# Supplementary material for: Integrated culturing, modeling and transcriptomics uncovers complex interactions and emergent behavior in a three-species synthetic gut community
Source: eLife. 2018 Oct 16;7:e37090. doi: 10.7554/eLife.37090 (PMC6237439; doi:10.7554/eLife.37090)
Supplement: Figure 3—source data 1. — The gas measurements are also included. [file elife-37090-fig3-data1.xlsx]

## Sheet: RI
		RI 14									RI 15									RI 16
Time (hours)		Species Log(cells/ ml)			Nutrients (mM)						Species Log(cells/ ml)			Nutrients (mM)						Species Log(cells/ ml)			Nutrients (mM)
		RI	FP	BH	Fructose	Formate	Acetate	Butyrate	Lactate		RI	FP	BH	Fructose	Formate	Acetate	Butyrate	Lactate		RI	FP	BH	Fructose	Formate	Acetate	Butyrate	Lactate
0.166667		8.42251	0	0	49.2599	0	48.1266	0.0453978	0.902901		8.64306	0	0	49.2192	1.2166	47.8213	2.111	2.37567		8.50761	0	0	46.3958	1.10797	44.9181	1.57757	1.25814
2		8.69128	0	0	48.209	0	47.1274	0.0859366	0.888099		9.07101	0	0	48.1072	1.31798	46.7999	4.44898	2.37197		8.95289	0	0	48.0628	1.22384	46.5223	3.31782	1.29515
3.33333		8.88002	0	0	47.9278	0	47.0608	0.643758	0.873298		9.3754	0	0	45.6372	1.35419	45.4899	7.903	2.36456		9.21374	0	0	46.2552	1.3035	45.0291	5.38342	1.29885
4.66667		9.11836	0	0	44.1237	0	45.0847	0.0472515	0.636471		9.45699	0	0	39.4094	2.31009	42.0372	15.178	2.32016		9.44917	0	0	41.5612	1.71627	42.4091	9.90807	1.24704
6		9.32279	0	0	39.7758	0.0434499	43.6081	0.176313	0.695678		9.59837	0	0	32.4175	3.17909	37.8518	21.8969	2.32756		9.03525	0	0	36.2382	2.42595	39.6392	15.2158	1.25444
7.33333		9.46503	0	0	34.1067	0.0663709	40.7549	0.0453978	0.71788		9.6311	0	0	26.1564	4.4681	34.3103	29.3724	2.36827		9.16704	0	0	31.7292	3.19357	37.7241	20.3987	1.26924
8.66667		9.53745	0	0	28.2749	0.0501717	37.9351	0.170368	0.762285		9.677	0	0	19.2773	5.92367	30.2304	36.5679	2.40897		9.48828	0	0	27.124	4.31603	36.0533	26.675	1.30995
10		9.64763	0	0	21.8694	0.0501717	35.1041	0.232963	0.784488		9.78778	0	0	11.1919	7.79202	27.5271	47.3159	2.58659		9.38317	0	0	20.8981	5.85126	34.1049	32.3421	1.33215
11.3333		9.67249	0	0	14.5981	0.109347	31.3294	0.636514	0.917703		9.90672	0	0	2.02968	8.7624	25.0291	55.1432	3.70041		9.62836	0	0	14.9608	7.65443	33.4943	38.9475	1.33215
12.6667		9.75776	0	0	7.40453	0.0434499	30.3081	0.136822	1.89461		9.86614	0	0	0	9.21863	25.0458	57.8103	4.25918		9.9067	0	0	9.73394	8.34239	34.3381	44.8946	1.35805
14		9.84235	0	0	0.0592066	0.0752575	29.9972	0.117947	3.5598		9.85514	0	0	0	9.06655	24.8404	58.1924	4.40349		9.92822	0	0	4.33134	8.45825	34.4824	50.2856	1.38766
15.3333		9.76639	0	0	0	0.0250858	29.098	0.820412	3.47839		9.69162	0	0	0	8.87103	24.8626	58.6048	4.58851		10.006	0	0	0	8.47274	35.4205	54.432	1.43206
16.6667		9.69704	0	0	0	0.0434499	28.8093	0.27521	3.5968		9.56634	0	0	0	8.85654	24.7405	58.7561	4.79574		10.0025	0	0	0	8.00927	34.932	53.6791	1.40616
18		9.63475	0	0	0	0.0752575	28.6539	0.515786	3.81143		9.45147	0	0	0	8.69723	24.4407	58.7145	4.90675		10.0464	0	0	0	7.99479	35.1596	54.1407	1.44686
24		9.51562	0	0	0	0.0663709	28.887	0.397717	4.39609		9.67196	0	0	0	8.5886	24.3075	59.369	4.93635		9.59019	0	0	0	8.03099	35.9034	55.1886	1.45796
30		9.55752	0	0	0	0.0752575	29.0203	0.244826	4.4923		9.55438	0	0	0	8.60308	24.0022	60.4131	4.95485		9.37238	0	0	0	9.24035	37.3911	56.7359	1.60968
48		9.15521	0	0	0	0.0904482	27.9545	0.267616	4.56631		9.29061	0	0	0	8.91448	23.3972	61.9037	4.96226		9.05083	0	0	0	9.68933	39.8723	58.8393	2.05003
		RI 14			RI 15			RI 16			Table headers state experiment identifiers (e.g. RI 14).
Time (hours)		H2 (mM)	CO2 (mM)		H2 (mM)	CO2 (mM)		H2 (mM)	CO2 (mM)		All tables report the mean across 3 technical replicates (gasses excepted).
0		0.0146199	0.064489		0.040353	0.0916005		2.37107e-05	0		Strain counts are obtained from qPCR data.
0.5		0.166797	0.210422		0.255218	0.320816		0.0571108	0.0784918
1		0.560235	0.392411		0.708971	0.656884		0.25572	0.261733		RI: Roseburia intestinalis L1-82
1.5		1.16764	0.609682		1.44592	1.15913		0.652891	0.495642		FP: Faecalibacterium prausnitzii A2-165
2		1.84612	0.868443		2.71936	1.78749		1.2987	0.800537		BH: Blautia hydrogenotrophica S5a33
2.5		2.64845	1.18687		4.55673	2.52092		2.2511	1.21852
3		3.78956	1.59213		6.49743	3.44842		3.52204	1.7809
3.5		5.02975	2.10259		8.57439	4.67769		4.89832	2.50056
4		6.25846	2.69703		10.8739	6.25318		6.43637	3.39198
4.5		7.73858	3.39429		13.0621	8.10647		8.39058	4.49385
5		9.70641	4.29009		15.2044	10.2333		10.5867	5.87108
5.5		11.9974	5.41705		17.4877	12.6105		12.7151	7.50992
6		14.2415	6.76343		19.9419	15.2214		14.9369	9.35919
6.5		16.5063	8.29588		22.6749	18.0459		17.3051	11.4065
7		18.8605	9.95567		25.5729	20.9879		19.6662	13.6221
7.5		21.3104	11.7663		28.556	24.1137		22.0532	16.0203
8		23.9802	13.7127		31.6567	27.4354		24.6465	18.5579
8.5		26.7532	15.7527		34.8505	30.8669		27.1559	20.878
9		29.7204	17.9229		38.4204	34.4892		29.6709	23.3304
9.5		33.2505	20.1977		42.2302	38.3115		32.5582	26.1709
10		36.9389	22.5913		46.3731	42.3351		35.3328	29.1214
10.5		40.2911	25.1269		50.8279	46.5725		37.9487	32.2518
11		43.5299	27.7344		55.481	50.924		40.3873	35.5614
11.5		46.9843	30.4522		60.5195	55.4831		43.1318	39.1339
12		50.8196	33.2738		64.2987	59.8608		46.3478	42.9534
12.5		54.9704	36.1269		65.926	63.5865		49.5752	46.92
13		59.3747	39.1063		66.5104	66.8136		52.8636	51.1039
13.5		63.9634	42.2047		66.7244	69.6025		56.2526	55.4279
14		68.8011	45.3821		66.8153	72.0132		59.7673	59.8431
14.5		72.5948	48.3656		66.8632	74.0855		63.2721	64.3834
15		74.1519	50.7795		66.898	75.7943		66.7589	68.8787
15.5		74.5147	52.709		66.9252	77.2287		69.749	73.2192
16		74.6187	54.2641		66.9422	78.4211		71.3748	77.0985
16.5		74.6677	55.4617		66.9575	79.3699		71.9093	80.2956
17		74.7002	56.4024		66.9718	80.1418		72.0933	83.0106
17.5		74.7255	57.1511		66.9844	80.7614		72.1589	85.3198
18		74.745	57.729		66.9979	81.2549		72.1788	87.2304
18.5		74.7609	58.1628		67.0138	81.657		72.1855	88.8231
19		74.7759	58.4769		67.0287	81.9744		72.1984	90.1098
19.5		74.7912	58.7061		67.0427	82.2248		72.2111	91.1402
20		74.8066	58.873		67.0577	82.4232		72.2274	91.9724
20.5		74.8189	58.9935		67.0761	82.5827		72.2447	92.6565
21		74.8285	59.0814		67.0954	82.7112		72.2633	93.2308
21.5		74.8414	59.1464		67.1126	82.8155		72.2896	93.7249
22		74.8556	59.1949		67.1499	82.9067		72.3218	94.1673
22.5		74.8679	59.2333		67.1999	82.9906		72.3576	94.5692
23		74.8807	59.2649		67.2347	83.0648		72.3938	94.9432
23.5		74.8936	59.2898		67.2601	83.1298		72.4268	95.2969
24		74.9053	59.3008		67.2853	83.1896		72.4595	95.6402
24.5		74.9174	59.3008		67.3108	83.2458		72.493	95.9772
25		74.9321	59.3008		67.3367	83.2982		72.525	96.2992
25.5		74.9466	59.3008		67.3631	83.3472		72.5585	96.6012
26		74.9594	59.3008		67.3921	83.3928		72.5953	96.8804
26.5		74.9732	59.3008		67.4211	83.4368		72.6339	97.1417
27		74.9884	59.3008		67.4497	83.4816		72.6695	97.391
27.5		75.0019	59.3008		67.4776	83.5277		72.6994	97.6295
28		75.0139	59.3008		67.5044	83.5741		72.7258	97.8564
28.5		75.0202	59.3008		67.5333	83.6202		72.7479	98.0754
29		75.0304	59.3008		67.5614	83.6643		72.7649	98.2875
29.5		75.0446	59.3008		67.5863	83.7074		72.78	98.4886
30		75.0572	59.3008		67.6136	83.7507		72.7948	98.6761
30.5		75.0774	59.3008		67.6492	83.7967		72.8052	98.8544
31		75.1006	59.3008		67.6865	83.8447		72.8141	99.0206
31.5		75.1209	59.3008		67.7204	83.8907		72.8243	99.1652
32		75.1405	59.3008		67.7548	83.9362		72.8334	99.2935
32.5		75.1615	59.3008		67.79	83.9809		72.8438	99.4111
33		75.1812	59.3008		67.8216	84.024		72.8531	99.5219
33.5		75.2014	59.3008		67.8515	84.065		72.8628	99.6276
34		75.2198	59.3008		67.8815	84.1035		72.8738	99.7292
34.5		75.2375	59.3008		67.913	84.1398		72.8834	99.8298
35		75.2599	59.3008		67.9495	84.1743		72.8931	99.9313
35.5		75.2837	59.3008		67.9844	84.2086		72.9022	100.034
36		75.3056	59.3008		68.017	84.2423		72.9098	100.137
36.5		75.3232	59.3008		68.0495	84.274		72.9192	100.244
37		75.3433	59.3008		68.0802	84.3052		72.9282	100.356
37.5		75.3665	59.3008		68.1106	84.3362		72.9382	100.477
38		75.3866	59.3008		68.1395	84.3655		72.9508	100.611
38.5		75.4052	59.3008		68.1691	84.3926		72.9596	100.764
39		75.4233	59.3008		68.202	84.4192		72.9681	100.944
39.5		75.4386	59.3008		68.2358	84.4454		72.9777	101.155
40		75.4542	59.3008		68.2679	84.4699		72.9868	101.404
40.5		75.4681	59.3008		68.2989	84.4931		72.9941	101.699
41		75.4804	59.3008		68.3292	84.5144		73.0014	102.032
41.5		75.4934	59.3008		68.3588	84.5246		73.0107	102.383
42		75.5043	59.3008		68.388	84.5246		73.0178	102.711
42.5		75.5154	59.3008		68.4195	84.5246		73.0234	102.978
43		75.5285	59.3008		68.4543	84.5246		73.0295	103.183
43.5		75.5447	59.3008		68.4871	84.5246		73.0355	103.339
44		75.5607	59.3008		68.5166	84.5246		73.0429	103.458
44.5		75.574	59.3008		68.5452	84.5246		73.051	103.55
45		75.5851	59.3008		68.5731	84.5246		73.057	103.625
45.5		75.5954	59.3008		68.6002	84.5246		73.064	103.691
46		75.606	59.3008		68.6264	84.5246		73.0733	103.749
46.5		75.617	59.3008		68.6527	84.5246		73.0818	103.798
47		75.6305	59.3008		68.6804	84.5246		73.0901	103.844
47.5		75.6496	59.3008		68.699	84.5352		73.0982	103.888
48		75.6669	59.3008		68.7152	84.5458		73.1085	103.934

## Sheet: FP
		FP 4									FP 14									FP 15
Time (hours)		Species Log(cells/ ml)			Nutrients (mM)						Species Log(cells/ ml)			Nutrients (mM)						Species Log(cells/ ml)			Nutrients (mM)
		RI	FP	BH	Fructose	Formate	Acetate	Butyrate	Lactate		RI	FP	BH	Fructose	Formate	Acetate	Butyrate	Lactate		RI	FP	BH	Fructose	Formate	Acetate	Butyrate	Lactate
0.166667		0	5.78299	0	49.4634	0.535882	47.5937	0.105928	0.0962108		0	6.21511	0	49.9815	1.10797	48.7427	0	2.09443		0	6.19144	0	50.4811	1.50626	49.4754	0	1.97972
2		0	6.75111	0	49.5485	0.506916	47.5826	0.189157	0.111012		0	6.87892	0	50.2664	1.23832	49.0258	0	2.07963		0	6.79756	0	50.7401	1.58592	49.6087	0	1.98342
3.33333		0	7.15854	0	49.3968	0.448983	47.6603	0.393448	0.133215		0	7.46045	0	50.544	1.35419	49.259	0.174025	2.10554		0	7.22294	0	50.9048	1.74524	49.6697	0.0529641	1.97602
4.66667		0	7.47908	0	49.63	0.434499	47.849	0.794461	0.192422		0	7.69141	0	51.334	1.60041	49.9195	0.571256	2.10184		0	7.59974	0	50.8344	1.91904	49.5143	0.412363	2.01303
6		0	7.57627	0	49.3894	0.347599	47.5715	1.11225	0.185021		0	7.89013	0	50.5902	1.75972	49.1424	0.945787	2.15364		0	7.68251	0	50.3719	2.10732	48.8426	0.749064	2.06113
7.33333		0	7.69404	0	49.6004	0.13035	47.5049	1.63432	0.207223		0	7.95871	0	50.6161	1.83938	48.7982	1.33167	2.14994		0	7.73926	0	50.7031	2.18698	48.9814	1.09333	2.06483
8.66667		0	7.89984	0	49.419	0.159316	46.9498	2.34555	0.222025		0	8.04911	0	50.877	1.9987	48.9425	1.72512	2.14254		0	7.76155	0	50.6161	2.23043	48.8149	1.35437	2.05373
10		0	7.77053	0	48.6456	0.434499	46.3281	3.05679	0.229426		0	8.09548	0	49.3339	2.12905	47.3328	2.12613	2.03523		0	7.83675	0	50.3645	2.38975	48.1932	1.75538	2.04263
11.3333		0	8.2892	0	47.6983	1.36143	45.4399	4.55491	0.214624		0	8.30694	0	49.0656	2.56355	47.1607	2.8071	1.97232		0	7.85998	0	50.1573	2.53458	48.1543	2.111	2.03523
12.6667		0	8.4761	0	46.0628	3.51944	44.685	7.39227	0.251628		0	8.523	0	49.2914	3.36013	47.194	3.77558	1.96122		0	7.93897	0	49.8705	2.76631	47.5937	2.56119	2.03153
14		0	8.62716	0	42.4142	6.06851	41.6764	10.9711	0.214624		0	8.70969	0	47.9759	5.35882	46.1227	5.80714	1.86501		0	8.06772	0	50.074	3.07046	47.2884	3.24973	2.01673
15.3333		0	8.86769	0	36.2308	10.9639	36.9248	15.458	0.222025		0	9.00084	0	45.1377	7.61822	44.0633	8.67098	1.85021		0	8.24075	0	49.7132	3.686	46.9997	4.38467	2.00562
16.6667		0	8.95469	0	33.9069	16.4675	35.637	21.1932	0.340438		0	9.1548	0	40.6713	10.3918	40.3608	12.9535	1.93902		0	8.4987	0	47.9259	5.19951	45.3566	6.09844	2.03153
18		0	9.01586	0	31.0058	18.3359	34.2381	24.8629	0.495856		0	9.15271	0	36.9782	14.7512	37.8684	18.8666	1.95382		0	8.82944	0	45.3745	8.02375	43.6248	9.81349	1.96862
19.3333		0	8.9895	0	28.8003	20.349	33.8385	26.6182	0.791889		0	9.1262	0	32.251	18.4952	35.1152	23.7922	2.06853		0	8.88905	0	40.9654	11.2608	40.0999	14.5689	1.96862
24		0	9.01562	0	26.8835	22.4057	34.0938	28.0029	1.39876		0	9.26201	0	26.4006	23.9844	33.2723	27.67	2.89742		0	9.05131	0	29.1815	22.4998	34.6878	26.9701	2.6532
30		0	8.88464	0	26.1175	21.7974	33.8829	28.6309	1.67999		0	9.13405	0	25.222	23.6875	32.8615	27.844	3.23046		0	8.98757	0	28.5431	23.0357	34.5379	28.1315	3.12315
48											0	8.93948	0	25.2202	24.093	33.5609	29.047	3.6042
		FP 4			FP 14			FP 15
Time (hours)		H2 (mM)	CO2 (mM)		H2 (mM)	CO2 (mM)		H2 (mM)	CO2 (mM)
0		0	0		0.00293531	0		0.00209849	0
0.5		0	0.00668892		0.0079674	0.00514005		0.00652847	0
1		0	0.0216061		0.0123473	0.0156087		0.00955956	0
1.5		0	0.0390425		0.0146304	0.0263789		0.0112851	0
2		0	0.0583161		0.0147237	0.0377794		0.0138034	0.00523572
2.5		0	0.0812878		0.014817	0.0497668		0.0152957	0.0166627
3		0	0.110422		0.0172284	0.0632072		0.0155859	0.0318249
3.5		0	0.14745		0.0201399	0.0802611		0.0158762	0.0539043
4		0	0.193671		0.0222409	0.103253		0.0171862	0.0849396
4.5		0	0.247316		0.0286934	0.132989		0.0195038	0.125675
5		0	0.306456		0.034427	0.170428		0.0206689	0.17752
5.5		0	0.371363		0.0408068	0.217152		0.0211934	0.238759
6		0	0.442892		0.0472766	0.273214		0.0217247	0.308074
6.5		0	0.519216		0.0504078	0.336704		0.0230375	0.384003
7		0	0.599073		0.0540249	0.405864		0.0243503	0.462601
7.5		0	0.683978		0.0578448	0.483006		0.0249132	0.545683
8		0	0.773741		0.060207	0.567045		0.0253119	0.633143
8.5		0	0.86735		0.0625128	0.654738		0.0278184	0.722297
9		0	0.967177		0.0659923	0.748823		0.0303248	0.81349
9.5		0	1.07525		0.0672247	0.850923		0.0363686	0.907538
10		0	1.19348		0.0678366	0.962511		0.0461234	1.00588
10.5		0	1.32305		0.0701728	1.08257		0.0540485	1.10904
11		0	1.46388		0.0744143	1.20939		0.0598979	1.21516
11.5		0	1.62363		0.0801607	1.34786		0.063888	1.32591
12		0	1.80824		0.0838352	1.50041		0.0667658	1.44189
12.5		0	2.02062		0.0842221	1.67316		0.0753338	1.55972
13		0	2.27724		0.0843579	1.87951		0.0839235	1.68655
13.5		0	2.59139		0.0873429	2.12438		0.0850131	1.82614
14		0	2.97713		0.0946862	2.42534		0.0874078	1.97815
14.5		0	3.44639		0.0992516	2.80129		0.0911075	2.14972
15		0	3.99964		0.102176	3.25099		0.0930999	2.34835
15.5		0	4.64757		0.106334	3.8193		0.0932424	2.58739
16		0	5.37385		0.107944	4.52241		0.0932424	2.87512
16.5		0	6.14142		0.108328	5.3082		0.0933169	3.22388
17		0	6.95327		0.108566	6.28413		0.0969162	3.66208
17.5		0	7.80072		0.108729	7.47723		0.101851	4.20784
18		0	8.66246		0.109494	8.79029		0.103589	4.8992
18.5		0	9.52045		0.110259	10.195		0.104001	5.76758
19		0	10.3577		0.110259	11.603		0.108528	6.79212
19.5		0	11.1831		0.110529	12.9909		0.117373	7.99846
20		0	11.9611		0.110799	14.2988		0.122033	9.34169
20.5		0	12.6544		0.110799	15.4416		0.126779	10.716
21		0	13.2667		0.111519	16.3911		0.131525	12.093
21.5		0	13.8018		0.112418	17.1285		0.131784	13.4346
22		0	14.2682		0.114937	17.6952		0.133078	14.6902
22.5		0	14.6715		0.117275	18.1316		0.142312	15.8094
23		0	15.0171		0.117275	18.472		0.152062	16.7443
23.5		0	15.3184		0.118085	18.7478		0.155427	17.4815
24		0	15.5907		0.120235	18.9806		0.157073	18.073
24.5		0	15.8346		0.122056	19.1773		0.159203	18.5527
25		0	16.0429		0.126463	19.3359		0.163649	18.9215
25.5		0	16.2197		0.13039	19.4651		0.166242	19.2037
26		0	16.3716		0.132881	19.5754		0.16865	19.4192
26.5		0	16.505		0.137958	19.6685		0.171243	19.5852
27		0	16.6217		0.147346	19.7476		0.171799	19.7172
27.5		0	16.7239		0.159033	19.8189		0.171984	19.8248
28		0	16.8151		0.16708	19.8812		0.172355	19.9142
28.5		0	16.8953		0.170241	19.9348		0.172725	19.99
29		0	16.965		0.170433	19.9822		0.172725	20.0538
29.5		0	17.026		0.171775	20.0239		0.174948	20.1078
30		0	17.0686		0.174182	20.052		0.178662	20.1448
30.5		0	17.108		0.175847	20.0762		0.183712	20.1797
31		0	17.1568		0.176659	20.1065		0.187467	20.221
31.5		0	17.2014		0.177573	20.1322		0.192309	20.2542
32		0	17.2424		0.178387	20.1437		0.199621	20.2813
32.5		0	17.2804		0.178691	20.1437		0.202586	20.2937
33		0	17.3162		0.178691	20.1437		0.203475	20.2937
33.5		0	17.3493		0.179402	20.1437		0.205748	20.2937
34		0	17.3791		0.180113	20.1437		0.207428	20.2937
34.5		0	17.4073		0.180215	20.1437		0.207428	20.2937
35		0	17.4346		0.18052	20.1437		0.21395	20.2937
35.5		0	17.4592		0.181739	20.1437		0.22057	20.2937
36		0	17.4816		0.196367	20.1437		0.221953	20.2937
36.5		0	17.4927		0.20998	20.1437		0.223633	20.2937
37		0	17.4927		0.216684	20.1437		0.229858	20.2937
37.5		0	17.4927		0.223694	20.1437		0.235886	20.2937
38		0	17.4927		0.225624	20.1437		0.238456	20.2937
38.5		0	17.4927		0.229485	20.1437		0.241815	20.2937
39		0	17.4927		0.234463	20.1437		0.242803	20.2937
39.5		0	17.4927		0.237206	20.1437		0.251005	20.2937
40		0	17.4927		0.237307	20.1437		0.260787	20.2937
40.5		0	17.4927		0.23751	20.1437		0.267704	20.2937
41		0	17.4927		0.239643	20.1437		0.27304	20.2937
41.5		0	17.4927		0.244418	20.1437		0.273535	20.2937
42		0	17.4927		0.24716	20.1437		0.274128	20.2937
42.5		0	17.4927		0.247364	20.1437		0.274325	20.2937
43		0	17.4927		0.247669	20.1437		0.274918	20.2937
43.5		0	17.4927		0.249903	20.1437		0.275511	20.2937
44		0	17.4927		0.252341	20.1437		0.281736	20.2937
44.5		0	17.4927		0.253052	20.1437		0.287863	20.2937
45		0	17.4927		0.255084	20.1437		0.288061	20.2937
45.5		0	17.4927		0.256811	20.1437		0.28984	20.2937
46		0	17.4927		0.258842	20.1437		0.291717	20.2937
46.5		0	17.4927		0.260874	20.1437		0.292112	20.2937
47		0	17.4927		0.262195	20.1437		0.292508	20.2937
47.5		0	17.4927		0.263515	20.1437		0.293002	20.2937
48		0	17.4927		0.263617	20.1437		0.293306	20.2937

## Sheet: BH
		BH 14									BH 15									BH 16
Time (hours)		Species Log(cells/ ml)			Nutrients (mM)						Species Log(cells/ ml)			Nutrients (mM)						Species Log(cells/ ml)			Nutrients (mM)
		RI	FP	BH	Fructose	Formate	Acetate	Butyrate	Lactate		RI	FP	BH	Fructose	Formate	Acetate	Butyrate	Lactate		RI	FP	BH	Fructose	Formate	Acetate	Butyrate	Lactate
0.166667		0	0	6.92951	49.9112	47.5487	1.23231	0	0.754885		0	0	7.38363	49.4412	50.1122	0.932556	0	1.99452		0	0	7.51134	50.6254	49.0694	0.793783	0	1.8132
2		0	0	7.38271	50.1073	47.3894	1.1879	0	0.784488		0	0	7.75379	49.3432	49.4677	1.01582	0	1.95752		0	0	7.80485	50.2997	49.1563	0.888149	0	1.791
3.33333		0	0	7.70481	49.8594	47.2735	1.28782	0	0.79929		0	0	7.98538	47.6058	47.5777	1.07133	0	1.96862		0	0	8.02089	50.1924	48.3308	1.05468	0	1.791
4.66667		0	0	7.85168	50.6032	47.708	1.35443	0	0.821492		0	0	8.14607	50.5514	49.924	1.24341	0	1.92422		0	0	8.16764	50.8289	48.8015	1.29892	0	1.8206
6		0	0	8.02464	50.5699	47.5053	1.39883	0	0.784488		0	0	8.2872	50.0981	48.5625	1.64863	0	1.94272		0	0	8.12387	50.9066	47.7515	1.5154	0	1.7947
7.33333		0	0	13.7213	48.283	45.159	1.55426	0	0.814091		0	0	8.49785	50.198	47.9253	2.45906	0	1.87981		0	0	8.5312	50.7993	46.9042	2.1149	0	1.8095
8.66667		0	0	13.7213	50.4144	46.3611	2.33139	0	0.843694		0	0	8.59416	49.4209	46.448	3.76908	0	1.85021		0	0	8.6669	50.037	45.0721	3.20289	0	1.8169
10		0	0	8.68438	49.6855	45.9411	3.25284	0	0.888099		0	0	8.87631	47.1877	43.2472	6.68332	0	1.94272		0	0	8.81725	48.7437	43.3051	5.51207	0	1.828
11.3333		0	0	9.0462	48.8714	43.8265	5.14016	0	0.865897		0	0	8.92884	45.9147	40.8791	10.5301	0	1.93902		0	0	9.04759	46.4772	40.2057	9.71968	0	1.96122
12.6667		0	0	9.13289	47.7094	41.9871	8.32639	0	1.03612		0	0	9.00254	43.6926	37.6349	13.6053	0	2.00192		0	0	9.24693	43.0118	35.4189	15.9645	0	2.05003
14		0	0	9.10278	45.1525	38.8008	11.3461	0	1.05092		0	0	9.10957	40.3752	34.1878	16.181	0	2.39047		0	0	9.32257	38.4936	30.6467	22.1982	0	2.39787
15.3333		0	0	9.3246	43.4318	36.7152	13.7441	0	1.21374		0	0	9.06433	38.982	32.8988	17.9295	0	3.05654		0	0	9.38729	35.3482	27.989	26.9387	0	3.01214
16.6667		0	0	9.47431	41.5742	34.8034	15.7979	0	1.53937		0	0	9.09854	37.8367	31.1101	18.7566	0	3.79663		0	0	9.37911	33.165	26.0555	28.615	0	3.84473
18		0	0	9.46061	40.3789	33.8909	17.2523	0	2.07223		0	0	9.08481	36.4583	29.4156	19.6947	0	4.60702		0	0	9.31047	30.6968	24.4116	29.7086	0	5.11027
19.3333											0	0	9.08834	36.005	27.7138	19.7169	0	5.22499		0	0	9.239	29.1278	22.3405	30.1638	0	6.2093
24.1667		0	0	9.39307	37.056	27.9238	19.2062	0	4.56631		0	0	9.15905	34.8228	22.5722	20.2775	0	6.2463		0	0	9.22122	27.1277	17.5972	31.9178	0	8.28893
30.1667		0	0	9.4042	35.9791	23.2312	19.8168	0	5.46181		0	0	9.38576	33.9013	16.1199	20.6606	0	6.85687		0	0	9.34182	25.9603	11.6156	32.4618	0	9.25844
48.1667		0	0	9.44685	33.3703	10.8335	19.5726	0	6.58674		0	0	9.62431	32.6173	2.49113	20.6328	0	7.94849
		BH 14			BH 15			BH 16
Time (hours)		H2 (mM)	CO2 (mM)		H2 (mM)	CO2 (mM)		H2 (mM)	CO2 (mM)
0		0.0153527	0.00663187		0.00758438	0		0.00209849	0
0.5		0.05509	0.0225006		0.0539067	0.0141949		0.00652847	0
1		0.108718	0.0417965		0.143914	0.0459986		0.00955956	0
1.5		0.137961	0.0608963		0.27434	0.0836954		0.0112851	0
2		0.173251	0.0820706		0.419841	0.126109		0.0138034	0.00523572
2.5		0.244394	0.107717		0.560255	0.173754		0.0152957	0.0166627
3		0.319284	0.136404		0.634604	0.2063		0.0155859	0.0318249
3.5		0.401088	0.168364		0.717634	0.24623		0.0158762	0.0539043
4		0.49063	0.203673		0.896506	0.3172		0.0171862	0.0849396
4.5		0.587513	0.243315		1.09367	0.400804		0.0195038	0.125675
5		0.690107	0.288131		1.31021	0.4987		0.0206689	0.17752
5.5		0.798687	0.339335		1.54096	0.609338		0.0211934	0.238759
6		0.914944	0.397541		1.78897	0.73315		0.0217247	0.308074
6.5		1.03819	0.462146		2.06712	0.871318		0.0230375	0.384003
7		1.16934	0.53315		2.36092	1.0272		0.0243503	0.462601
7.5		1.31448	0.612191		2.67407	1.20594		0.0249132	0.545683
8		1.47362	0.701822		3.03324	1.41201		0.0253119	0.633143
8.5		1.65466	0.804154		3.41924	1.63715		0.0278184	0.722297
9		1.84882	0.921523		3.82216	1.90758		0.0303248	0.81349
9.5		2.05641	1.05865		4.29425	2.24549		0.0363686	0.907538
10		2.31092	1.22067		4.8458	2.64037		0.0461234	1.00588
10.5		2.61552	1.41265		5.4588	3.1092		0.0540485	1.10904
11		2.95503	1.63848		6.10794	3.65241		0.0598979	1.21516
11.5		3.32415	1.90212		6.78039	4.25799		0.063888	1.32591
12		3.73328	2.2084		7.44106	4.91543		0.0667658	1.44189
12.5		4.15771	2.56188		8.08386	5.60592		0.0753338	1.55972
13		4.60169	2.96046		8.75018	6.32472		0.0839235	1.68655
13.5		5.06949	3.39697		9.41493	7.0606		0.0850131	1.82614
14		5.52839	3.86709		10.1023	7.80094		0.0874078	1.97815
14.5		5.98575	4.36233		10.8068	8.54482		0.0911075	2.14972
15		6.44868	4.87099		11.4941	9.27596		0.0930999	2.34835
15.5		6.91616	5.3879		12.2672	9.98863		0.0932424	2.58739
16		7.39189	5.90942		13.0125	10.6833		0.0932424	2.87512
16.5		7.86813	6.43015		13.624	11.3489		0.0933169	3.22388
17		8.32471	6.94474		14.2137	11.9814		0.0969162	3.66208
17.5		8.67137	7.29512		14.7771	12.5745		0.101851	4.20784
18		8.99505	7.63409		15.3107	13.1187		0.103589	4.8992
18.5		9.39446	8.10816		15.8443	13.6185		0.104001	5.76758
19		9.77969	8.55341		16.3617	14.0792		0.108528	6.79212
19.5		10.131	8.96927		16.8393	14.5024		0.117373	7.99846
20		10.4542	9.35782		17.3065	14.8922		0.122033	9.34169
20.5		10.7631	9.72002		17.7725	15.2563		0.126779	10.716
21		11.0603	10.0605		18.2224	15.6062		0.131525	12.093
21.5		11.342	10.3821		18.6765	15.9445		0.131784	13.4346
22		11.615	10.6852		19.1258	16.2737		0.133078	14.6902
22.5		11.8981	10.9696		19.5655	16.598		0.142312	15.8094
23		12.1751	11.2353		20.0128	16.9142		0.152062	16.7443
23.5		12.436	11.4874		20.4589	17.2259		0.155427	17.4815
24		12.6951	11.7336		20.9008	17.5383		0.157073	18.073
24.5		12.9384	11.9731		21.3307	17.8543		0.159203	18.5527
25		13.1889	12.2031		21.756	18.169		0.163649	18.9215
25.5		13.4461	12.4261		22.1913	18.4738		0.166242	19.2037
26		13.6845	12.6442		22.6202	18.7736		0.16865	19.4192
26.5		13.9207	12.8585		23.0486	19.0682		0.171243	19.5852
27		14.1706	13.0694		23.4669	19.3565		0.171799	19.7172
27.5		14.4256	13.2766		23.8743	19.6411		0.171984	19.8248
28		14.6785	13.4824		24.2963	19.9217		0.172355	19.9142
28.5		14.9329	13.6863		24.7205	20.1997		0.172725	19.99
29		15.1879	13.8869		25.1381	20.4768		0.172725	20.0538
29.5		15.4426	14.0875		25.5354	20.7536		0.174948	20.1078
30		15.6802	14.2927		25.9119	21.0313		0.178662	20.1448
30.5		15.9151	14.5023		26.3417	21.3108		0.183712	20.1797
31		16.1658	14.7069		26.7649	21.5898		0.187467	20.221
31.5		16.4196	14.9028		27.1191	21.8605		0.192309	20.2542
32		16.6702	15.0928		27.4847	22.1232		0.199621	20.2813
32.5		16.9165	15.2788		27.8712	22.381		0.202586	20.2937
33		17.1627	15.4617		28.2401	22.6319		0.203475	20.2937
33.5		17.4085	15.6415		28.5997	22.8759		0.205748	20.2937
34		17.6482	15.8208		28.959	23.1149		0.207428	20.2937
34.5		17.8773	15.9989		29.3071	23.3505		0.207428	20.2937
35		18.0994	16.1745		29.6398	23.5843		0.21395	20.2937
35.5		18.3243	16.35		29.9452	23.8134		0.22057	20.2937
36		18.5473	16.5242		30.2627	24.0354		0.221953	20.2937
36.5		18.7615	16.6965		30.593	24.2511		0.223633	20.2937
37		18.9902	16.8677		30.9175	24.4643		0.229858	20.2937
37.5		19.2206	17.0367		31.2402	24.6749		0.235886	20.2937
38		19.4296	17.2037		31.5985	24.8813		0.238456	20.2937
38.5		19.6303	17.3675		31.9537	25.0829		0.241815	20.2937
39		19.8274	17.5272		32.2567	25.2778		0.242803	20.2937
39.5		20.0254	17.6855		32.5528	25.4684		0.251005	20.2937
40		20.2205	17.8435		32.851	25.6562		0.260787	20.2937
40.5		20.4064	17.9975		33.1405	25.8407		0.267704	20.2937
41		20.5827	18.1472		33.4152	26.0198		0.27304	20.2937
41.5		20.7587	18.296		33.6805	26.1943		0.273535	20.2937
42		20.9335	18.4434		33.9333	26.3647		0.274128	20.2937
42.5		21.0974	18.5872		34.1884	26.5291		0.274325	20.2937
43		21.2604	18.7263		34.4415	26.6878		0.274918	20.2937
43.5		21.4206	18.8619		34.6807	26.8411		0.275511	20.2937
44		21.5711	18.9945		34.8953	26.9944		0.281736	20.2937
44.5		21.7205	19.1246		35.104	27.1459		0.287863	20.2937
45		21.869	19.2517		35.3167	27.2902		0.288061	20.2937
45.5		22.0118	19.3755		35.5163	27.4272		0.28984	20.2937
46		22.1508	19.4959		35.7088	27.5563		0.291717	20.2937
46.5		22.2839	19.6128		35.8836	27.6795		0.292112	20.2937
47		22.4105	19.727		36.0515	27.7976		0.292508	20.2937
47.5		22.5255	19.8383		36.2182	27.9095		0.293002	20.2937
48		22.6322	19.9506		36.3771	28.0158		0.293306	20.2937

## Sheet: RI-BH
		RI-BH 4									RI-BH 5									RI-BH 6									RI-BH 7
Time (hours)		Species Log(cells/ ml)			Nutrients (mM)						Species Log(cells/ ml)			Nutrients (mM)						Species Log(cells/ ml)			Nutrients (mM)						Species Log(cells/ ml)			Nutrients (mM)
		RI	FP	BH	Fructose	Formate	Acetate	Butyrate	Lactate		RI	FP	BH	Fructose	Formate	Acetate	Butyrate	Lactate		RI	FP	BH	Fructose	Formate	Acetate	Butyrate	Lactate		RI	FP	BH	Fructose	Formate	Acetate	Butyrate	Lactate
0.166667		8.37209	0	7.37537	45.4115	1.07176	43.708	2.01264	0.577265		8.15644	0	7.33419	48.1276	1.07176	1.73189	2.0656	0.577265		8.30815	0	7.61648	47.5725	0	47.96	1.48299	0.584665		8.25309	0	7.62462	47.8094	1.01383	1.86511	2.01264	0.592066
2		8.47095	0	7.98892	45.9184	0.970382	44.4185	4.45655	0.606868		8.2666	0	7.64425	47.6465	0.999348	1.98723	2.93572	0.614269		8.65314	0	7.96675	46.8139	0	47.2384	2.36825	0.569864		8.35801	0	8.06029	47.1174	0.840032	2.19817	2.64064	0.636471
3.33333		9.16114	0	8.62555	41.1486	0.782099	43.1529	9.55624	0.606868		8.53456	0	7.96439	47.2247	0.897965	2.17596	3.60912	0.62907		8.93854	0	8.218	47.4504	0	48.282	3.99501	0.62907		8.47334	0	8.55619	45.5188	0.521399	2.91979	3.03409	0.651273
4.66667		9.42675	0	8.70756	29.2518	0.724165	41.8762	20.255	0.695678		8.77636	0	8.36906	47.073	0.738649	2.74216	4.47168	0.80669		9.11682	0	8.38445	45.1155	0	47.3272	5.90928	0.569864		8.58334	0	8.73146	44.8194	0	4.99584	4.19173	0.851095
6		9.79229	0	8.89303	5.42851	0.0724165	36.0366	40.8656	1.7984		9.1031	0	8.52031	44.9711	0.391049	3.65251	6.11357	0.858496		9.50937	0	8.61137	40.0644	0	45.9728	10.6004	0.481054		9.14352	0	9.46439	37.4852	0	10.4802	7.4982	1.64298
7.33333		9.94203	0	9.14762	0	0	35.2928	44.8757	2.34606		9.20834	0	8.63247	41.2596	0	6.38357	8.30023	0.969509		9.77714	0	8.51735	32.2861	0	44.9958	18.6812	0.636471		9.57821	0	9.51514	15.9784	0	29.1868	15.3823	3.84843
8.66667		9.97125	0	9.29611	0	0	35.1707	45.2086	2.35346		9.5625	0	8.89078	34.1289	0	10.5024	13.2259	1.28034		9.92485	0	8.76776	20.6002	0	39.678	28.6384	0.814091		9.66705	0	9.67701	0	0	44.1299	21.7304	6.82356
10		9.94729	0	9.33065	0	0	36.2698	46.7597	2.55329		9.63817	0	9.18895	21.5586	0	18.8399	17.97	1.90201		9.97487	0	8.95436	7.58585	0	34.7266	41.4785	1.56157		9.57884	0	9.67077	0	0	44.3963	22.1617	6.86057
11.3333		9.94461	0	9.3939	0	0	35.0375	45.5718	2.61249		9.71832	0	9.39821	5.23609	0	32.7505	24.076	3.5376		10.0682	0	9.11615	0	0	33.5387	48.0157	2.03523		9.68214	0	9.85054	0	0	43.597	22.2147	6.72735
12.6667		9.96667	0	9.40104	0	0	36.292	47.0775	2.80491		9.8757	0	9.81879	0	0	38.3791	25.5817	3.75962		10.0598	0	9.27474	0	0	35.0597	48.3033	2.05003		9.54643	0	9.84092	0	0	47.4604	24.2197	7.34902
14		9.89894	0	9.36322	0	0	34.8709	45.0876	2.6865		9.77564	0	9.69311	0	0	40.1221	25.9978	3.73742		10.0936	0	9.37403	0	0	36.2698	48.5075	2.06483		9.52522	0	9.91134	0	0	45.7175	23.6901	7.09739
15.3333		9.78547	0	9.36175	0	0	36.514	47.2969	2.82712		9.77776	0	9.7509	0	0	40.1776	25.7708	3.71522		10.0314	0	9.41693	0	0	36.8138	48.7497	2.05743		9.55453	0	9.88305	0	0	44.0078	22.8805	6.83097
16.6667		9.65564	0	9.28997	0	0	36.1699	47.3575	2.80491		9.77409	0	9.79266	0	0	42.1982	27.2387	3.90764		10.0876	0	9.57475	0	0	36.4141	48.2806	2.05743		9.67758	0	9.9363	0	0	44.0855	22.8654	6.82356
18		9.55951	0	9.31162	0	0	36.3142	48.1065	2.82712		9.73343	0	9.80903	0	0	41.9428	27.2538	3.92984		10.0657	0	9.64816	0	0	37.5132	50.1192	2.17584		9.67863	0	9.97333	0	0	44.6406	23.569	6.98638
24.1667		9.30553	0	9.11831	0	0	35.7813	48.901	2.86412		9.80354	0	10.0635	0	0	40.977	27.1554	3.92984		10.0874	0	9.7894	0	0	37.6575	50.5126	2.37567		9.48627	0	10.0214	0	0	44.2076	23.9095	6.85317
30.1667		9.25299	0	8.9626	0	0	35.6037	49.249	2.86412		9.86417	0	9.98165	0	0	41.4988	27.9196	4.01865		9.96992	0	9.68774	0	0	38.6123	52.9111	2.44227		9.17776	0	9.86951	0	0	43.6969	24.3786	6.77916
48.1667		8.96638	0	8.88449	0	0	35.0486	48.6059	2.74571		9.32207	0	9.58304	0	0	40.3331	30.2803	4.01125		9.47383	0	9.43158	0	0	37.0913	55.1432	2.42747		8.81897	0	9.70124	0	0	46.9831	25.8692	7.1122
		RI-BH 4			RI-BH 5			RI-BH 6			RI-BH 7
Time (hours)		H2 (mM)	CO2 (mM)		H2 (mM)	CO2 (mM)		H2 (mM)	CO2 (mM)		H2 (mM)	CO2 (mM)
0		0.0481281	0.0772411		30.1067	46.8101		0.0607979	0.0779101		0	0
0.5		0.331711	0.275063		30.1184	46.9328		0.295596	0.254364		0.159076	0.0870412
1		0.914843	0.552609		30.1301	47.0395		0.727246	0.465915		0.649711	0.278253
1.5		1.77994	0.919134		30.1415	47.136		1.30877	0.708775		1.37474	0.504424
2		2.95106	1.40411		30.1526	47.2249		2.07051	0.99051		2.11382	0.753475
2.5		4.7536	2.07684		30.1641	47.3038		3.02393	1.32413		2.80892	1.02476
3		7.43225	3.04373		30.1771	47.3745		4.28738	1.73725		3.5184	1.32432
3.5		11.1647	4.43569		30.1902	47.4376		5.9934	2.26462		4.28311	1.65356
4		16.0371	6.42275		30.203	47.4944		7.73131	2.90534		5.21518	2.02953
4.5		21.7498	9.11924		30.2148	47.548		9.41898	3.66425		6.45843	2.48484
5		28.3951	12.6236		30.2265	47.5988		11.4811	4.59992		8.26325	3.08901
5.5		35.4325	17.0693		30.239	47.6469		13.8694	5.74469		10.815	3.92091
6		42.3819	22.5107		30.2514	47.6933		16.4986	7.1536		14.1131	5.06023
6.5		47.3341	28.311		30.2644	47.7389		19.445	8.87213		17.8286	6.54965
7		48.9802	33.6314		30.2779	47.7854		22.7048	10.8929		21.7832	8.44241
7.5		49.2291	38.4982		30.2921	47.8338		26.309	13.2886		25.6889	10.8161
8		49.2808	43.0004		30.3074	47.8844		30.0985	16.0947		29.2501	13.6437
8.5		49.2983	47.0199		30.3238	47.9363		33.9415	19.2937		31.5412	16.7426
9		49.3115	50.6595		30.3405	47.9881		37.9359	22.9541		32.216	19.7024
9.5		49.324	53.9128		30.3562	48.0414		41.9086	27.0325		32.3568	22.2837
10		49.3349	56.7769		30.3716	48.0976		45.8156	31.5396		32.3839	24.4714
10.5		49.3452	59.3073		30.3877	48.1571		49.6686	36.4006		32.396	26.4183
11		49.3553	61.4919		30.4033	48.2208		52.3678	41.1098		32.4169	28.2328
11.5		49.3656	63.3755		30.4188	48.2877		53.3808	45.3066		32.4338	29.855
12		49.3767	64.9873		30.4341	48.3571		53.6168	49.0023		32.45	31.3005
12.5		49.3877	66.3441		30.4481	48.4282		53.6793	52.2188		32.4655	32.5441
13		49.399	67.5077		30.4616	48.5016		53.6999	55.0015		32.4835	33.6265
13.5		49.4117	68.5108		30.4755	48.5773		53.7114	57.3869		32.5035	34.5783
14		49.426	69.3699		30.4898	48.654		53.7205	59.3903		32.5223	35.4047
14.5		49.4418	70.1063		30.5032	48.7313		53.7306	61.0753		32.5401	36.1206
15		49.4577	70.7239		30.5161	48.8106		53.7407	62.4786		32.558	36.7296
15.5		49.475	71.2449		30.5293	48.89		53.7502	63.6648		32.5785	37.259
16		49.4941	71.6899		30.5421	48.9681		53.7633	64.6634		32.5988	37.7201
16.5		49.5129	72.0667		30.5549	49.046		53.7773	65.4906		32.6182	38.1125
17		49.5316	72.3932		30.5683	49.1245		53.7896	66.1854		32.6411	38.4515
17.5		49.5504	72.68		30.5807	49.203		53.8021	66.7652		32.6675	38.7455
18		49.5706	72.9315		30.5938	49.2792		53.8168	67.2488		32.6948	39.0018
18.5		49.5905	73.1568		30.6076	49.3544		53.8325	67.6548		32.7237	39.2269
19		49.6109	73.3553		30.6196	49.4275		53.8448	67.9886		32.7548	39.4211
19.5		49.6328	73.5279		30.631	49.4973		53.8566	68.2611		32.7859	39.5885
20		49.6531	73.6799		30.6434	49.5655		53.8683	68.486		32.8158	39.7351
20.5		49.6735	73.8162		30.6569	49.6327		53.8813	68.6759		32.8484	39.8663
21		49.6943	73.9404		30.6698	49.6985		53.8964	68.8372		32.8832	39.986
21.5		49.7138	74.0568		30.6823	49.7616		53.9089	68.9726		32.915	40.0963
22		49.7344	74.1665		30.6941	49.8222		53.9209	69.0884		32.9457	40.1987
22.5		49.7564	74.27		30.7059	49.8803		53.9343	69.1888		32.9763	40.294
23		49.776	74.3669		30.719	49.9357		53.9477	69.2764		33.007	40.3826
23.5		49.7951	74.4564		30.7332	49.9899		53.9652	69.3552		33.0392	40.4665
24		49.8142	74.5417		30.746	50.0436		53.9837	69.4295		33.0729	40.5497
24.5		49.8322	74.6261		30.7603	50.0967		54.0023	69.499		33.1074	40.6326
25		49.8517	74.7081		30.7753	50.1497		54.0239	69.5625		33.1423	40.7131
25.5		49.8716	74.7877		30.7877	50.2026		54.0459	69.6205		33.1796	40.7903
26		49.8923	74.8647		22.6202	18.7736		54.0693	69.674		33.2155	40.8623
26.5		49.9133	74.9394		23.0486	19.0682		54.095	69.7251		33.249	40.9296
27		49.9352	75.012		23.4669	19.3565		54.1232	69.7757		33.283	40.9953
27.5		49.9585	75.0813		23.8743	19.6411		54.1535	69.8266		33.316	41.0603
28		49.9799	75.1486		24.2963	19.9217		54.1858	69.8781		33.3481	41.1243
28.5		50.0008	75.2142		24.7205	20.1997		54.2204	69.9312		33.3828	41.187
29		50.0211	75.2786		25.1381	20.4768		54.2558	69.9859		33.4182	41.2489
29.5		50.0419	75.3423		25.5354	20.7536		54.2909	70.0445		33.4511	41.3106
30		50.0646	75.4052		25.9119	21.0313		54.3288	70.1097		33.4887	41.3743
30.5		50.0895	75.4692		26.3417	21.3108		54.3673	70.1806		33.53	41.4405
31		50.1153	75.533		26.7649	21.5898		54.4046	70.2554		33.57	41.5085
31.5		50.1392	75.5953		27.1191	21.8605		54.4385	70.3336		33.6093	41.5782
32		50.1617	75.6567		27.4847	22.1232		54.4693	70.4138		33.6497	41.6486
32.5		50.1856	75.7175		27.8712	22.381		54.4999	70.4957		33.6925	41.7193
33		50.2107	75.7777		28.2401	22.6319		54.5211	70.5791		33.7396	41.7901
33.5		50.2341	75.8383		28.5997	22.8759		54.5392	70.6627		33.787	41.8627
34		50.2566	75.9008		28.959	23.1149		54.5649	70.7455		33.8317	41.9395
34.5		50.2797	75.9644		29.3071	23.3505		54.5908	70.8274		33.8822	42.0213
35		50.3031	76.0288		29.6398	23.5843		54.6125	70.9079		33.948	42.1122
35.5		50.3276	76.0955		29.9452	23.8134		54.6225	70.9877		34.0449	42.2156
36		50.352	76.1639		30.2627	24.0354		54.634	71.0646		34.1973	42.338
36.5		50.3759	76.2337		30.593	24.2511		54.6547	71.137		34.3749	42.4841
37		50.4027	76.3061		30.9175	24.4643		54.6733	71.2049		34.4961	42.6384
37.5		50.429	76.3801		31.2402	24.6749		54.6921	71.2686		34.5579	42.7884
38		50.4529	76.4571		31.5985	24.8813		54.7124	71.3293		34.603	42.9352
38.5		50.4748	76.5381		31.9537	25.0829		54.7318	71.3868		34.6426	43.081
39		50.4961	76.6232		32.2567	25.2778		54.7491	71.4406		34.6796	43.2289
39.5		50.5202	76.7126		32.5528	25.4684		54.767	71.4915		34.7141	43.373
40		50.5445	76.807		32.851	25.6562		54.7856	71.5395		34.7483	43.5041
40.5		50.5667	76.9073		33.1405	25.8407		54.8053	71.5839		34.7853	43.6196
41		50.5878	77.0147		33.4152	26.0198		54.8242	71.6255		34.8219	43.7215
41.5		50.6068	77.1259		33.6805	26.1943		54.8432	71.6646		34.8527	43.8124
42		50.6232	77.2311		33.9333	26.3647		54.8629	71.701		34.8848	43.8941
42.5		50.6393	77.3231		34.1884	26.5291		54.8819	71.7342		34.9204	43.9703
43		50.6557	77.4019		34.4415	26.6878		54.9007	71.7647		34.9564	44.0425
43.5		50.6722	77.4699		34.6807	26.8411		54.9201	71.7939		34.9962	44.1107
44		50.6907	77.5301		34.8953	26.9944		54.9382	71.822		35.0399	44.1769
44.5		50.7092	77.5836		35.104	27.1459		54.9564	71.8489		35.0849	44.243
45		50.7175	77.6315		35.3167	27.2902		54.9746	71.8746		35.1284	44.3067
45.5		50.7278	77.6761		35.5163	27.4272		54.9943	71.899		35.1692	44.3668
46		50.7481	77.7181		35.7088	27.5563		55.017	71.9221		35.2065	44.423
46.5		50.7669	77.7571		35.8836	27.6795		55.0384	71.9438		35.2429	44.4746
47		50.7872	77.7941		36.0515	27.7976		55.058	71.965		35.2814	44.5242
47.5		50.808	77.8289		36.2182	27.9095		55.078	71.985		35.3201	44.5741
48		50.8263	77.8639		36.3771	28.0158		55.1011	72.0053		35.3545	44.6257

## Sheet: FP-BH
		FP-BH 1									FP-BH 2									FP-BH 3
Time (hours)		Species Log(cells/ ml)			Nutrients (mM)						Species Log(cells/ ml)			Nutrients (mM)						Species Log(cells/ ml)			Nutrients (mM)
		RI	FP	BH	Fructose	Formate	Acetate	Butyrate	Lactate		RI	FP	BH	Fructose	Formate	Acetate	Butyrate	Lactate		RI	FP	BH	Fructose	Formate	Acetate	Butyrate	Lactate
0.166667		0	7.01973	7.58822	48.5827	1.2166	47.9267	0.680967	0.947306		0	1.8925e+06	1.97155e+07	0.198688	0.0250858	0.2035	0.0453978	0.976909		0	6.90334	7.60441	46.9546	1.10073	3.45268	0.416146	0.939905
2		0	7.31664	7.79049	48.6567	1.27453	48.1932	0.832293	0.98431		0	3.04495e+06	1.13884e+07	0.577585	0.0752575	0.535312	0.0680967	1.02131		0	7.19297	7.77108	47.2062	0.970382	3.73022	0.514508	0.976909
3.33333		0	7.63432	8.13673	48.0943	1.4773	48.2709	1.3014	1.02872		0	1.14914e+07	7.80489e+06	0.44631	0.0501717	0.466674	0.0472515	1.07312		0	7.76182	8.08354	47.7909	0.970382	4.07438	0.703666	1.02131
4.66667		0	8.03632	8.31777	46.2626	2.53458	48.0933	2.82223	1.06572		0	3.14637e+07	2.76643e+07	0.29434	0.0663709	0.183433	0.0346731	1.12493		0	8.23595	8.37333	45.5225	1.43385	4.796	1.84618	1.06572
6		0	8.32343	8.62892	42.9063	4.77949	47.516	6.43135	1.08052		0	1.76169e+08	1.69628e+08	0.128026	0.0752575	0.116965	0.081842	1.11753		0	8.70783	8.72864	43.0987	2.95459	6.39467	4.63814	1.09532
7.33333		0	8.67945	8.78639	36.5157	9.93555	48.0822	13.2259	1.06572		0	2.82117e+08	6.2319e+08	0.211895	0.109347	0.584827	0.0472515	1.12493		0	9.12436	8.80234	35.9902	5.21399	9.41438	8.92823	1.04352
8.66667		0	9.10712	9.12505	29.311	12.6874	48.393	19.627	1.12493		0	1.1733e+08	4.78281e+08	0.26942	0.0868998	0.51847	0.205965	1.73919		0	9.42698	9.02652	25.3256	5.40227	15.0763	12.1969	1.04352
10		0	9.30294	9.13092	21.6733	13.1219	51.8457	24.3559	1.13973		0	2.73053e+08	4.94042e+08	0.206296	0.139672	1.16712	0.443839	1.94642		0	9.51957	9.12538	18.7315	7.83547	27.4216	18.1743	1.05832
11.3333		0	9.42466	9.23298	16.9146	12.8612	54.6323	25.9373	1.16933		0	5.37998e+08	1.00934e+09	0.0279375	7.38507e-16	0.605331	0.176556	2.19805		0	9.58731	9.25653	12.1226	8.28445	35.97	20.3685	1.13233
12.6667		0	9.40374	9.31418	13.9617	10.4859	60.6606	27.3597	1.42836		0	1.47083e+08	1.06847e+09	0	0.0868998	2.64124	0.771206	2.50888		0	9.58933	9.43539	5.23979	6.64784	47.7491	21.5791	2.02783
14		0	9.38184	9.62645	9.7913	7.32855	64.0466	27.617	2.33866		0	1.71496e+08	1.33802e+09	0	0	1.86937	0.682982	2.58289		0	9.5593	9.62953	0	3.51944	55.7646	21.9801	3.70041
15.3333		0	9.40083	9.78071	6.2833	5.21399	68.5429	28.5703	3.63381		0	7.18416e+08	1.00046e+09	0	0	1.35329	0.24058	2.60509		0	9.49402	9.74211	0	1.3904	57.2634	22.1314	3.69301
16.6667		0	9.41395	9.7984	2.63099	3.46151	71.2961	28.8579	4.89935		0	2.10902e+07	8.02534e+08	0	0	0.909269	0.318055	2.6865		0	9.52877	9.81304	0	0.289666	58.4957	22.3962	3.76702
18		0	9.39257	9.84228	0	1.43385	74.6267	29.4707	5.43221		0	3.26528e+08	1.17039e+09	0	0	1.1363	0.403717	2.7087		0	9.53201	9.80352	0	0	58.3514	22.1087	3.78182
24		0	9.41272	10.0098	0	0	75.9589	29.5161	5.22499		0	9.45516e+07	6.73241e+08	0	0	1.46708	0.384097	2.96033		0	9.39557	9.96526	0	0	58.3847	22.6838	3.97425
30		0	9.26318	9.90727	0	0	74.2492	29.5237	4.97336		0	5.25466e+07	1.05123e+08	0	0	3.51848	1.11602	3.17496		0	9.27398	9.93034	0	0	60.5717	23.7582	4.62552
48		0	9.11028	9.59483	0	0	76.6028	30.9083	5.66163		0	7.06522e+07	1.24917e+08	0	0	1.32722	0.406262	3.44879		0	8.87585	9.37414	0	0	61.5043	24.1365	5.02516
		FP-BH 1			FP-BH 2			FP-BH 3
Time (hours)		H2 (mM)	CO2 (mM)		H2 (mM)	CO2 (mM)		H2 (mM)	CO2 (mM)
0		5.50435e-05	0		0.039143	0.0195683		0.0164986	0.00908272
0.5		0.0276045	0.0254763		0.133959	0.0672343		0.0950051	0.0403991
1		0.0878695	0.0833675		0.2752	0.126804		0.249433	0.0933623
1.5		0.181425	0.151402		0.477597	0.196921		0.482285	0.163534
2		0.361255	0.233505		0.73367	0.282576		0.817094	0.253537
2.5		0.646689	0.340494		1.02666	0.386961		1.23678	0.364825
3		1.05307	0.475716		1.3746	0.515349		1.76312	0.500084
3.5		1.63392	0.656185		1.8399	0.682545		2.50322	0.672407
4		2.44972	0.903935		2.54558	0.913599		3.51654	0.898909
4.5		3.50526	1.24198		3.51692	1.24423		4.59971	1.13632
5		4.81595	1.71387		4.666	1.71697		6.01947	1.48645
5.5		6.15093	2.36134		6.02002	2.34718		8.02212	2.04875
6		7.67538	3.21936		7.20863	3.12302		10.456	2.80727
6.5		9.76302	4.32004		8.12871	4.04715		13.4125	3.78639
7		12.352	5.6865		9.14426	5.14444		16.3952	4.96241
7.5		15.1237	7.37247		10.3083	6.46954		19.046	6.36575
8		17.6405	9.38533		11.7627	8.0181		21.6389	7.99768
8.5		20.0773	11.6501		13.5166	9.73882		24.2813	9.82296
9		22.7354	14.1721		15.7559	11.6064		27.0764	11.8507
9.5		25.5577	16.9229		18.0942	13.58		29.8047	14.0403
10		28.7074	19.8393		19.9584	15.5948		32.3985	16.3505
10.5		32.1478	22.8759		21.6474	17.5699		35.1339	18.716
11		35.559	25.94		23.2211	19.4212		37.9237	21.0708
11.5		38.8241	29.0397		24.5931	21.1293		40.7592	23.4422
12		41.7652	32.1127		25.6412	22.7502		43.386	25.8169
12.5		44.4487	35.0386		26.3189	24.1988		45.7809	28.1415
13		47.0066	37.923		26.7899	25.3593		48.2287	30.4641
13.5		49.7391	40.7724		27.1261	26.2616		50.3699	32.8153
14		52.6281	43.5799		27.355	27.1037		51.9911	35.2079
14.5		55.2296	46.3815		27.4918	27.9209		53.3355	37.5538
15		57.7248	49.0952		27.5515	28.5864		54.5396	39.6768
15.5		60.5493	51.7607		27.5743	29.1233		55.65	41.6064
16		63.474	54.3741		27.5944	29.5506		56.6153	43.4125
16.5		66.1168	56.9218		27.6172	29.8837		57.5303	45.0775
17		69.0758	59.4488		27.6422	30.1462		58.3847	46.6439
17.5		72.0397	61.9123		27.6686	30.3548		59.0451	48.1127
18		74.4219	64.2968		27.6981	30.5243		59.5896	49.455
18.5		76.3605	66.4714		27.7299	30.6621		59.9931	50.6749
19		77.8137	68.3189		27.7589	30.7675		60.2525	51.7576
19.5		78.919	69.927		27.7902	30.8491		60.3992	52.7122
20		79.7368	71.3413		27.8235	30.9155		60.4689	53.5434
20.5		80.3058	72.5519		27.8548	30.9707		60.5073	54.2642
21		80.6546	73.5594		27.8851	31.0176		60.5375	54.8828
21.5		80.8336	74.39		27.9158	31.0568		60.5674	55.4137
22		80.9074	75.0673		27.9469	31.0907		60.5946	55.8727
22.5		80.9428	75.6131		27.9772	31.1197		60.6213	56.2677
23		80.9676	76.0478		28.0091	31.1443		60.6514	56.6124
23.5		80.991	76.4062		28.0434	31.1663		60.6851	56.9172
24		81.0157	76.7274		28.081	31.1872		60.7171	57.1945
24.5		81.0444	77.0109		28.1181	31.208		60.7513	57.4463
25		81.073	77.2396		28.1506	31.2285		60.7908	57.6675
25.5		81.098	77.4202		28.1839	31.2479		60.8292	57.8619
26		81.1246	77.5677		28.2219	31.2572		60.8704	58.0344
26.5		81.1523	77.6903		28.259	31.2572		60.9143	58.1885
27		81.1795	77.7943		28.2926	31.2572		60.9584	58.3273
27.5		81.205	77.8827		28.3298	31.2572		61.004	58.4567
28		81.2364	77.9577		28.3655	31.2572		61.0542	58.5814
28.5		81.2562	78.0234		28.3984	31.2572		61.1061	58.7044
29		81.2703	78.0826		28.4357	31.2572		61.1639	58.8283
29.5		81.2999	78.136		28.4732	31.2572		61.2225	58.9583
30		81.33	78.1837		28.513	31.2572		61.2737	59.1027
30.5		81.3662	78.2291		28.5528	31.2572		61.3358	59.2758
31		81.4064	78.2725		28.5972	31.2572		61.4111	59.4879
31.5		81.4442	78.3096		28.6448	31.2572		61.4919	59.7465
32		81.4847	78.3411		28.6833	31.2572		61.5728	60.0658
32.5		81.5241	78.3685		28.7217	31.2572		61.6661	60.4151
33		81.5594	78.3921		28.7625	31.2572		61.7661	60.7474
33.5		81.5939	78.4028		28.804	31.2572		61.85	61.0504
34		81.6294	78.4028		28.8457	31.2572		61.9144	61.3171
34.5		81.6646	78.4028		28.8845	31.2572		61.9627	61.5509
35		81.6993	78.4028		28.9202	31.2572		62.0032	61.7577
35.5		81.7345	78.4028		28.9552	31.2572		62.0385	61.9381
36		81.7671	78.4028		28.9943	31.2572		62.0741	62.0962
36.5		81.799	78.4028		29.0351	31.2572		62.1104	62.2355
37		81.8311	78.4028		29.0735	31.2572		62.1421	62.3603
37.5		81.8643	78.4028		29.1117	31.2572		62.1734	62.4719
38		81.8956	78.4028		29.1516	31.2572		62.2088	62.571
38.5		81.9254	78.4028		29.1913	31.2572		62.246	62.6602
39		81.9572	78.4028		29.2312	31.2572		62.2837	62.7402
39.5		81.9896	78.4028		29.2713	31.2572		62.3195	62.8122
40		82.0194	78.4028		29.3104	31.2572		62.3554	62.8777
40.5		82.0465	78.4028		29.3501	31.2572		62.3918	62.9386
41		82.0726	78.4028		29.3894	31.2572		62.4271	62.9968
41.5		82.101	78.4028		29.4276	31.2572		62.463	63.0523
42		82.1328	78.4028		29.4642	31.2572		62.4991	63.1041
42.5		82.1601	78.4028		29.4982	31.2572		62.5346	63.1536
43		82.1841	78.4028		29.5258	31.2572		62.5712	63.2008
43.5		82.2075	78.4028		29.5565	31.2572		62.6106	63.2451
44		82.231	78.4028		29.5981	31.2572		62.6458	63.2882
44.5		82.2531	78.4028		29.6364	31.2572		62.6769	63.3301
45		82.2761	78.4028		29.6702	31.2572		62.7135	63.3716
45.5		82.3017	78.4028		29.7052	31.2572		62.7515	63.4145
46		82.3276	78.4028		29.7359	31.2572		62.785	63.4579
46.5		82.3518	78.4028		29.7702	31.2572		62.816	63.5025
47		82.3751	78.4028		29.8098	31.2572		62.8527	63.5481
47.5		82.3984	78.4028		29.8457	31.2572		62.8929	63.5957
48		82.4218	78.4028		29.8885	31.2572		62.9334	63.6494

## Sheet: RI-FP
		RI-FP 8									RI-FP 9
Time (hours)		Species Log(cells/ ml)			Nutrients (mM)						Species Log(cells/ ml)			Nutrients (mM)
		RI	FP	BH	Fructose	Formate	Acetate	Butyrate	Lactate		RI	FP	BH	Fructose	Formate	Acetate	Butyrate	Lactate
0.166667		8.07662	6.84957	0	48.9084	0	48.504	2.14883	0.62167		8.23571	6.87758	0	46.0406	0	46.9609	2.20179	1.48757
2		8.56741	7.34527	0	48.6086	0	48.6706	3.04165	0.599467		8.79767	7.18172	0	45.0414	0.0144833	46.8276	5.37207	1.58378
3.33333		8.65869	7.72731	0	47.4097	0.0579332	47.9711	4.20686	0.62907		9.03928	7.28518	0	39.3095	0.318633	44.2742	11.0771	1.62078
4.66667		8.89212	8.01203	0	46.1886	0.405533	48.282	6.64321	0.695678		9.25578	7.06082	0	30.9688	1.53523	39.9223	19.4227	2.31646
6		9.28763	8.49627	0	40.3456	1.27453	45.0069	10.8501	0.569864		9.56269	7.61244	0	21.603	2.83873	34.7932	27.67	3.04174
7.33333		9.39313	8.58912	0	34.758	2.91114	42.0871	16.9485	0.577265		9.53878	7.57306	0	13.3881	3.91049	31.4849	37.2716	3.89284
8.66667		9.36703	8.53388	0	29.6255	4.69259	39.9001	23.1983	0.606868		9.62827	7.63298	0	3.67451	4.67811	27.899	46.616	5.52842
10		9.55944	8.69784	0	25.8918	6.48852	39.0674	30.1971	0.725281		9.74484	7.77083	0	0	5.06916	26.9442	50.4899	6.66075
11.3333		9.66881	8.70202	0	21.0739	7.44442	36.514	34.4721	0.71048		9.7235	7.84015	0	0	5.11261	26.7666	50.0359	6.89017
12.6667		9.74143	8.75974	0	16.2522	8.03824	33.9828	38.6108	0.791889		9.58762	7.76715	0	0	5.19951	26.9331	50.2554	7.04559
14		9.79335	8.71867	0	11.9782	8.5886	32.7283	42.6437	0.843694		9.44021	7.76183	0	0	5.31537	26.6889	50.2781	7.07519
15.3333		9.90386	8.80278	0	7.78197	9.11	32.1288	47.2591	1.01391		9.3666	7.73501	0	0	5.37331	26.8443	50.3462	7.08259
16.6667		9.95195	8.84297	0	4.16297	9.47208	32.0289	50.7547	1.16193		9.18818	7.68933	0	0	5.46021	26.8554	51.2087	7.1566
18		10.0309	8.83293	0	0.510657	9.53002	31.4849	53.1911	1.23594		9.21426	7.72726	0	0	5.41676	26.6112	51.2541	7.1788
24		9.72403	8.65803	0	0	9.11	31.0075	53.6678	1.90201		8.91947	7.49394	0	0	5.40227	26.0339	51.587	7.26021
30		9.81449	8.43703	0	0	9.39967	32.5951	57.118	2.20545		8.83667	7.5965	0	0	5.64849	26.9997	54.2579	7.66726
48		9.32916	8.1526	0	0	8.99413	30.9742	58.3362	2.44227		8.42804	6.84784	0	0	5.41676	25.5676	52.2604	7.62285
		RI-FP 8			RI-FP 9
Time (hours)		H2 (mM)	CO2 (mM)		H2 (mM)	CO2 (mM)
0		0.0073721	0.03857		0.0661831	0.0901482
0.5		0.0944025	0.152061		0.509438	0.30561
1		0.366563	0.318823		1.59547	0.600095
1.5		0.815373	0.518188		3.48274	0.995557
2		1.40361	0.747491		6.81986	1.57264
2.5		2.10952	1.00927		11.2087	2.39082
3		3.0517	1.31966		16.2827	3.47786
3.5		4.48559	1.71923		22.4824	4.95535
4		6.56064	2.26135		29.005	6.8706
4.5		8.89718	2.96637		35.4287	9.16657
5		11.2176	3.841		42.0849	11.835
5.5		13.7021	4.90356		49.0983	14.829
6		16.4141	6.1873		56.5172	18.1698
6.5		19.2289	7.69626		63.9998	21.8284
7		21.9523	9.39449		71.4349	25.7106
7.5		24.6697	11.2741		78.9182	29.8725
8		27.392	13.3381		87.2215	34.2586
8.5		30.0989	15.5396		96.3744	38.7866
9		32.9499	17.8389		105.228	43.5813
9.5		35.9805	20.2077		113.226	48.4152
10		39.003	22.6859		118.231	52.8227
10.5		41.8838	25.2313		119.912	56.7272
11		44.6727	27.7501		120.443	60.1911
11.5		47.5169	30.3305		120.658	63.2931
12		50.7457	32.9687		120.79	66.1091
12.5		54.023	35.5876		120.93	68.6259
13		57.2173	38.2521		121.09	70.885
13.5		60.5733	40.9984		121.251	72.9193
14		63.9527	43.7817		121.43	74.7398
14.5		67.4361	46.5677		121.606	76.3744
15		71.0066	49.3085		121.772	77.8187
15.5		74.738	52.0576		121.935	79.1018
16		78.5382	54.8024		122.096	80.223
16.5		82.2548	57.4765		122.247	81.1858
17		86.0833	60.1813		122.399	82.0384
17.5		89.9768	62.9119		122.545	82.7827
18		93.9104	65.6359		122.675	83.4295
18.5		97.1749	68.2296		122.792	84.0026
19		98.9316	70.4178		122.899	84.5003
19.5		99.6112	72.2024		123.002	84.9311
20		99.8494	73.6987		123.104	85.303
20.5		99.9518	74.9571		123.197	85.6279
21		100.018	76.0182		123.282	85.9139
21.5		100.07	76.908		123.367	86.1635
22		100.118	77.6487		123.447	86.3831
22.5		100.16	78.2572		123.527	86.5792
23		100.206	78.7603		123.614	86.7563
23.5		100.251	79.1767		123.702	86.9203
24		100.296	79.5312		123.787	87.0751
24.5		100.344	79.8343		123.865	87.2181
25		100.391	80.084		123.938	87.3431
25.5		100.436	80.2901		124.006	87.4552
26		100.482	80.4574		124.07	87.5581
26.5		100.529	80.592		124.129	87.6514
27		100.574	80.7049		124.182	87.7353
27.5		100.619	80.8007		124.233	87.8113
28		100.663	80.8818		124.279	87.8823
28.5		100.707	80.9517		124.321	87.9483
29		100.755	81.0123		124.361	88.0083
29.5		100.801	81.0664		124.399	88.0637
30		100.85	81.1187		124.439	88.1163
30.5		100.903	81.1695		124.472	88.1669
31		100.942	81.2189		124.505	88.2146
31.5		100.977	81.2666		124.542	88.2582
32		101.025	81.3107		124.57	88.2984
32.5		101.078	81.353		124.597	88.3358
33		101.131	81.3954		124.628	88.3704
33.5		101.186	81.4391		124.66	88.4024
34		101.245	81.4841		124.686	88.432
34.5		101.311	81.531		124.712	88.4594
35		101.38	81.5787		124.736	88.4851
35.5		101.446	81.6271		124.755	88.5084
36		101.515	81.6794		124.776	88.5299
36.5		101.587	81.7354		124.794	88.5502
37		101.657	81.7928		124.812	88.5599
37.5		101.725	81.8514		124.83	88.5599
38		101.792	81.9117		124.845	88.5599
38.5		101.854	81.9712		124.857	88.5599
39		101.91	82.0295		124.872	88.5599
39.5		101.963	82.0874		124.888	88.5599
40		102.009	82.1447		124.904	88.5599
40.5		102.051	82.2015		124.919	88.5599
41		102.088	82.2567		124.933	88.5599
41.5		102.121	82.3099		124.946	88.5599
42		102.15	82.3615		124.961	88.5599
42.5		102.178	82.4124		124.976	88.5599
43		102.208	82.4621		124.989	88.5599
43.5		102.233	82.5095		125.005	88.5599
44		102.252	82.5544		125.019	88.5599
44.5		102.272	82.5965		125.026	88.5599
45		102.291	82.6356		125.034	88.5599
45.5		102.307	82.6721		125.046	88.5599
46		102.323	82.706		125.057	88.5599
46.5		102.34	82.7375		125.069	88.5599
47		102.354	82.7677		125.08	88.5599
47.5		102.368	82.7971		125.091	88.5599
48		102.382	82.826		125.097	88.5599

## Sheet: RI-FP-BH
		RI-FP-BH 10									RI-FP-BH 11									RI-FP-BH 12									RI-FP-BH 13									RI-FP-BH 14									RI-FP-BH 15
Time (hours)		Species Log(cells/ ml)			Nutrients (mM)						Species Log(cells/ ml)			Nutrients (mM)						Species Log(cells/ ml)			Nutrients (mM)						Species Log(cells/ ml)			Nutrients (mM)						Species Log(cells/ ml)			Nutrients (mM)						Species Log(cells/ ml)
		RI	FP	BH	Fructose	Formate	Acetate	Butyrate	Lactate		RI	FP	BH	Fructose	Formate	Acetate	Butyrate	Lactate		RI	FP	BH	Fructose	Formate	Acetate	Butyrate	Lactate		RI	FP	BH	Fructose	Formate	Acetate	Butyrate	Lactate		RI	FP	BH	Fructose	Formate	Acetate	Butyrate	Lactate		RI	FP	BH
0.166667		2.76903e+07	439475	3.17846e+06	0.0948491	0.0868998	0.019229	0.0917365	1.60598		1.58548e+07	1.18833e+06	6.93414e+06	0.346636	0	0.150183	0.0131052	0.658674		7.4571	6.35123	7.58395	50.1036	1.24556	2.33139	0	0.488455		5.74666	5.13611	6.47826	51.5209	6.41611	1.64863	0	2.06853		213724	91838.9	1.21125e+06	1.24539	0.160137	0.125726	0	2.09443		5.85592	5.18777	6.49272
2		7.09732e+07	553893	1.08343e+07	0.0669151	0.0250858	0.057687	0.0693463	1.791		4.02269e+07	2.25677e+06	1.07037e+07	0.149077	1.84627e-16	0.0333056	0.0131052	0.518058		7.34969	6.56608	7.85393	50.2146	1.14418	2.42021	0.20429	0.53286		6.32956	5.4478	6.92522	51.9039	6.03954	1.69303	0	2.05743		758174	214995	6.06635e+06	0.224874	0.0331854	0.273802	0	2.07963		6.23575	5.39975	6.78229
3.33333		1.47963e+08	3.48269e+06	2.09989e+07	0.0999112	0.0250858	0.019229	0.0917365	2.12404		1.25824e+07	1.03633e+07	2.81881e+07	0.240413	0.0501717	0.0333056	0.0524209	0.569864		7.35759	7.03154	8.0674	50.0074	1.0428	2.64224	0.151326	0.555062		6.13794	6.05535	7.20979	51.2045	6.63336	1.87621	0	2.05003		478966	777847	6.04541e+06	1.51487	0.0331854	0.327317	0	2.09443		5.74965	5.46234	6.71569
4.66667		1.62205e+08	4.52742e+06	4.5322e+07	0.915522	0	0.116965	0.27521	2.53848		9.90458e+07	1.25104e+07	1.67493e+08	0.730239	0.0501717	0.211519	0.129071	0.62167		7.30911	7.38701	8.26866	50.037	0.941415	2.9864	0.370749	0.569864		5.94693	6.73841	7.45622	51.3914	6.86509	1.99278	0	2.02413		74915.4	1.56826e+06	3.03481e+06	0.886056	0.0979633	0.0333056	0	2.10554		5.33822	5.61608	6.79971
6		3.13562e+08	1.06517e+07	8.32652e+06	0.173525	0.0501717	0.0333056	0.0945031	2.83452		1.87157e+08	5.57247e+07	1.01478e+08	0.118702	0.0434499	0.138662	0.0131052	0.584665		7.48128	7.84942	8.58952	48.8344	0.955898	3.93006	1.82348	0.62167		5.69941	7.14102	7.52401	50.7826	5.99609	2.03164	0.0680967	2.07963		176900	1.77285e+07	2.34143e+07	1.12805	0.0783305	0.0917164	0	2.10924		5.29649	6.51225	7.34916
7.33333		1.16218e+08	6.78603e+06	1.399e+08	0.254361	0.0250858	0.0666112	0.0453978	3.10095		3.8666e+08	6.18208e+07	5.24692e+07	0.187848	0.0250858	0.0881183	0.113494	0.614269		7.66434	8.16072	8.91924	46.9435	1.66558	5.3733	3.99501	0.62907		5.25447	7.10435	7.49543	51.136	6.60439	2.33694	0.442629	2.08333		61518.5	1.48633e+07	1.92895e+07	0.599681	0.229915	0.10835	0	2.17954		5.62386	7.13048	7.55243
8.66667		2.26632e+08	6.50228e+06	3.16838e+08	0.180488	0.0434499	0.0881183	0.183473	3.70041		3.4637e+08	1.59427e+08	1.3111e+08	0.0256372	0.0434499	0.138662	0.0131052	2.26465		7.83636	8.6757	9.00696	42.2032	3.38909	8.54843	7.71006	0.614269		5.54595	8.19698	8.0708	49.3376	6.53197	3.09187	1.71377	2.11664		52955.3	2.33239e+06	2.6817e+07	0.542041	0.0762956	0.125726	0	2.20545		5.17465	8.18458	8.06049
10		5.72307e+08	3.46242e+07	1.7064e+08	0.544791	0.0250858	0.452188	0.77076	5.89846		1.78058e+08	1.1855e+07	3.74484e+08	0.146856	0.0663709	0.419086	0.471788	6.01687		8.13709	9.13676	9.22907	34.214	4.18568	14.3214	11.9018	0.599467		5.56211	8.46723	8.31577	47.3079	7.50235	4.06883	3.94961	2.15364		32659	2.26481e+07	4.37808e+07	0.481754	0.0250858	0.368374	0	2.23875		5.34183	8.54179	8.42021
11.3333		3.07041e+08	3.88167e+07	6.02257e+08	0.0293711	0.0501717	0.185438	0.189006	8.13351		3.02137e+08	1.01933e+08	1.15667e+09	0	0.0904482	0.277324	0.312058	8.42954		8.29098	9.22041	9.48603	23.7715	5.28641	23.8024	15.98	1.00651		5.83059	9.01726	8.44742	43.935	10.6887	6.65001	7.10476	2.16474		84967.6	6.55019e+07	1.25601e+08	0.202604	0	0.507933	0	2.44597		5.44755	8.81696	8.51548
12.6667		3.06849e+08	9.24619e+06	9.43227e+08	0	0	0.0333056	0.0262104	8.40734		4.84487e+08	7.16973e+07	6.26411e+08	0	0.0250858	0.200756	0.141755	8.72558		8.52493	9.36457	9.57309	14.9201	6.35817	34.6156	19.4832	1.53197		5.86192	9.14094	8.80932	36.932	10.4859	11.2018	10.7858	2.17584		40270.7	4.49465e+07	2.08439e+08	0.594521	0.112886	0.665487	0	4.51451		5.52895	9.07689	8.98216
14		4.15365e+08	5.52637e+07	1.33222e+09	0	0	0.307664	0.236983	8.25933		3.15909e+08	8.64379e+07	7.2322e+08	0	0.0250858	0.317715	0.136193	8.74778		8.6301	9.44695	9.75434	6.47943	5.64849	44.8626	21.1705	3.6042		6.0113	9.28181	9.19821	27.211	12.5281	20.8548	15.0115	2.34606		102135	2.81824e+07	1.50683e+08	0.0854507	0.0651749	0.607389	0	10.165		5.67412	9.22697	9.27715
15.3333		5.61448e+08	3.61679e+07	8.22327e+08	0	0	0.462696	0.500063	8.0743		4.50824e+08	1.02083e+08	4.52284e+08	0	0	0.466278	0.507055	8.68117		8.68421	9.37733	9.79346	0	3.51944	49.8473	20.8754	6.05388		6.33288	9.45132	9.32589	18.6427	14.5702	30.3691	18.3634	2.29796		82325.8	5.49995e+07	2.19343e+08	0.0231091	0.0878004	0.388882	0	11.3751		5.88642	9.31986	9.29351
16.6667		1.70956e+08	2.11541e+07	1.9373e+09	0	0	0.704946	0.639744	7.85228		2.78321e+08	6.42771e+07	9.20935e+08	0	0	0.10175	0.081842	8.13351		8.62513	9.30223	9.91931	0	1.40488	53.4333	21.8893	5.95767		6.57375	9.55387	9.37865	11.0994	12.8901	41.2989	20.0507	2.6384		117916	1.47537e+08	1.95202e+08	0	0.0979633	0.666389	0	11.4935		6.22467	9.46517	9.38827
18		4.15547e+08	1.98839e+07	1.89047e+09	0	0	0.116965	0.0571243	7.62285		4.34127e+08	6.58262e+07	2.28967e+09	0	0	0.356126	0.26112	8.918		8.58814	9.25832	9.96608	0	0.202766	54.5323	22.2525	5.98727		6.8845	9.56321	9.56146	5.25829	7.00992	50.4913	20.4933	3.90024		37070.6	9.8239e+07	3.08246e+08	0	0	0.10835	0	11.3011		6.54457	9.47324	9.5142
24		7.01907e+08	2.49622e+06	1.28182e+09	0	0	0.476087	0.223558	7.74867		5.08282e+08	8.59307e+07	3.56425e+09	0	0	0.218399	0.335913	9.16223		8.52956	9.33207	10.0758	0	0	55.3428	22.994	6.15749		7.84866	9.40754	9.85399	0	0	61.4155	21.6207	5.98357		44967.9	5.97674e+06	4.87122e+08	0	0	0.466278	0	11.8302		7.61862	9.30158	9.89843
30		1.63289e+08	2.11157e+07	3.87731e+08	0	0	0.2587	0.270806	7.89668		4.41323e+08	2.76558e+07	3.36688e+08	0	0	0.126093	0.0945031	9.14742		8.28101	9.16544	10.0509	0	0	53.411	22.6308	6.09088		8.21748	9.40064	10.0408	0	0	61.7874	22.4303	6.13899		44876	1.63788e+07	6.66225e+08	0	0	0.544812	0	11.5712		8.18796	9.31073	10.1598
48		5.03043e+07	1.80388e+07	4.41599e+08	0	0	0.483027	0.671187	7.1196		5.2381e+08	5.0703e+07	4.90856e+08	0	0	0.195153	0.129071	9.33985		7.798	8.92336	9.71777	0	0	56.0089	24.3635	6.86057		7.91978	9.22937	9.9951	0	0	61.9872	23.2853	6.65335		53876.6	2.9624e+06	7.46429e+08	0	0	0.0824271	0	11.8561		7.68086	9.11099	9.76654
		RI-FP-BH 10			RI-FP-BH 11			RI-FP-BH 12			RI-FP-BH 13			RI-FP-BH 14			RI-FP-BH 15
Time (hours)		H2 (mM)	CO2 (mM)		H2 (mM)	CO2 (mM)		H2 (mM)	CO2 (mM)		H2 (mM)	CO2 (mM)		H2 (mM)	CO2 (mM)		H2 (mM)	CO2 (mM)
0		0.0893487	0.0813567		0.128473	0.0783778		0.00855079	0.0170607		0	0		0	0		0.000700737	0
0.5		0.445956	0.262048		0.528783	0.250891		0.0533836	0.0574955		0.0133543	0.00614703		0	0		0.00140147	0
1		1.15003	0.474074		1.10648	0.452438		0.132575	0.107617		0.0413198	0.0198336		0.0148442	0.00790932		0.012646	0.00644672
1.5		2.15402	0.718775		1.4356	0.566119		0.22827	0.161931		0.070699	0.0342874		0.0452187	0.0236956		0.0364092	0.0190257
2		3.43287	1.00437		1.87666	0.708429		0.361256	0.220421		0.103515	0.0480465		0.0804863	0.0396295		0.0609802	0.0316814
2.5		4.94468	1.33424		2.77259	1.00209		0.540951	0.284937		0.140521	0.061922		0.123509	0.0566699		0.0876011	0.0447683
3		6.76375	1.72758		3.91609	1.34276		0.76167	0.356943		0.184311	0.0758086		0.185301	0.0755135		0.119255	0.0581474
3.5		9.17014	2.22225		5.48535	1.75876		1.02911	0.440474		0.245831	0.0903059		0.285865	0.0972051		0.160299	0.0719401
4		12.3335	2.85473		7.64466	2.29011		1.37817	0.538271		0.332624	0.107153		0.431432	0.124137		0.220889	0.086416
4.5		15.8522	3.63305		10.3302	2.9751		1.82142	0.65721		0.461397	0.127818		0.615813	0.158351		0.311912	0.102798
5		19.4151	4.56947		13.207	3.83923		2.43422	0.809495		0.64188	0.154521		0.830537	0.202507		0.453022	0.123566
5.5		23.1126	5.66906		16.1647	4.88296		3.34695	1.01141		0.876832	0.189852		1.06822	0.258105		0.651481	0.150639
6		27.082	6.93647		19.4096	6.13175		4.56236	1.2934		1.18739	0.238053		1.34274	0.327628		0.909101	0.186442
6.5		31.1812	8.37295		22.9214	7.61407		6.26594	1.68056		1.58887	0.304067		1.69219	0.417354		1.22863	0.234629
7		35.0525	9.96206		26.4905	9.33127		8.39415	2.19819		2.11504	0.40039		2.17043	0.536313		1.62721	0.299905
7.5		39.0469	11.7123		30.0715	11.2738		10.928	2.8853		2.83679	0.547648		2.87699	0.703128		2.16353	0.394251
8		42.8655	13.578		33.3719	13.4086		14.0698	3.75879		3.80574	0.757222		3.86899	0.940429		2.92115	0.528495
8.5		45.8952	15.5217		36.0836	15.6776		16.9472	4.64617		5.04418	1.03956		5.21437	1.27887		3.93453	0.715382
9		48.2883	17.5934		38.6938	18.0731		19.4787	5.71532		6.57281	1.42486		6.96473	1.76461		5.2068	0.98439
9.5		50.3307	19.7865		41.5341	20.5616		22.0052	7.10931		8.42367	1.93725		9.32551	2.42078		6.76362	1.35097
10		52.3013	22.1356		44.6036	23.2484		24.3859	8.67195		10.6973	2.61286		12.0395	3.28999		8.69277	1.84391
10.5		54.139	24.6542		47.8735	26.1903		26.9459	10.3914		13.3861	3.47148		14.7921	4.41065		11.0309	2.50093
11		55.7565	27.3222		50.2829	29.1592		29.7302	12.2095		16.5051	4.50078		17.4036	5.77761		13.8506	3.33977
11.5		57.0851	30.2425		51.5182	31.9209		32.6688	14.1379		19.8032	5.75368		19.8694	7.47196		16.704	4.30997
12		57.8647	33.2929		52.3402	34.412		35.593	16.1584		22.7304	7.22412		22.4336	9.51062		19.294	5.45917
12.5		58.1558	36.1149		53.1045	36.6969		38.6063	18.2082		25.2841	8.85711		25.0621	11.84		21.7677	6.82741
13		58.2689	38.5937		53.8147	38.8269		41.6856	20.2937		28.0573	10.7126		28.3051	14.544		24.1947	8.40723
13.5		58.3132	40.8224		54.3976	40.7977		44.8219	22.3632		31.4506	12.7932		31.9564	17.5682		26.7868	10.1975
14		58.3329	42.8395		54.8616	42.62		48.1915	24.4313		35.5831	15.0504		35.5481	20.8116		29.7104	12.1859
14.5		58.3521	44.6602		55.2726	44.2966		51.2677	26.539		40.028	17.4485		39.137	24.1332		33.0273	14.3649
15		58.3723	46.2852		55.6721	45.7839		53.7781	28.6096		44.2301	19.903		42.1529	27.135		36.4706	16.6425
15.5		58.3918	47.7674		56.0182	47.1289		55.9252	30.6518		48.7962	22.4151		44.3719	29.7501		40.0761	19.0319
16		58.4106	49.1221		56.3139	48.3277		57.6472	32.5614		54.1199	24.9589		45.9917	32.0699		43.9911	21.4713
16.5		58.4274	50.3163		56.5434	49.3713		58.9876	34.236		59.8146	27.4437		46.6568	33.1557		48.1755	23.8772
17		58.4463	51.3885		56.7171	50.297		60.1211	35.7682		65.2206	29.9341		46.8935	33.9242		52.6583	26.3156
17.5		58.466	52.3493		56.7921	50.7412		61.0899	37.1824		69.6929	32.4505		47.2743	35.2534		57.2179	28.7884
18		58.489	53.2037		56.8245	51.0725		61.8989	38.4582		73.7166	34.9637		47.525	36.3038		61.4928	31.3193
18.5		58.516	53.9695		56.8783	51.6667		62.5664	39.6161		77.5484	37.44		47.7134	37.1238		65.3727	33.8727
19		58.542	54.6431		56.9148	52.1715		63.0732	40.6554		80.6182	39.8015		47.8747	37.7277		68.6179	36.323
19.5		58.5688	55.2302		56.9439	52.5969		63.4143	41.563		82.9274	42.025		48.0182	38.1705		71.2476	38.5994
20		58.5994	55.747		56.9719	52.9517		63.6181	42.3382		84.5209	44.0108		48.1554	38.4943		73.3327	40.6585
20.5		58.6354	56.2055		56.9989	53.2513		63.7168	42.9986		85.3537	45.6366		48.2997	38.7342		74.6423	42.497
21		58.6729	56.6152		57.0268	53.5057		63.7629	43.5514		85.6977	46.9133		48.4497	38.9162		75.2523	44.0434
21.5		58.7141	56.9818		57.0549	53.7208		63.7916	44.0157		85.8193	47.9315		48.5999	39.055		75.456	45.2476
22		58.7598	57.3108		57.084	53.9044		63.8144	44.4086		85.8662	48.7513		48.7458	39.1624		75.535	46.166
22.5		58.8139	57.6107		57.1127	54.064		63.8359	44.7382		85.9002	49.4136		48.8902	39.2478		75.5803	46.8699
23		58.88	57.8868		57.1436	54.2051		63.8537	45.0196		85.9345	49.9541		49.0339	39.3172		75.6203	47.4226
23.5		58.9559	58.1439		57.1829	54.3312		63.8726	45.2592		85.9744	50.3963		49.172	39.3757		75.6688	47.8671
24		59.0587	58.3927		57.2299	54.4481		63.8961	45.4679		86.032	50.7773		49.3078	39.43		75.7344	48.2422
24.5		59.1764	58.6357		57.2845	54.5579		63.9211	45.6541		86.125	51.1221		49.4148	39.4824		75.8167	48.6067
25		59.2976	58.8691		57.3409	54.6599		63.9477	45.815		86.2372	51.4242		49.5155	39.5274		75.9138	48.9603
25.5		59.4321	59.0963		57.3974	54.756		63.9769	45.9522		86.3346	51.6823		49.6452	39.5644		76.0336	49.2631
26		59.571	59.3205		57.4511	54.8458		64.0064	46.0704		86.4133	51.9042		49.7732	39.5963		76.1746	49.5165
26.5		59.7131	59.5409		57.5007	54.9303		64.0365	46.1735		86.4837	52.098		49.8944	39.6239		76.3013	49.734
27		59.8635	59.7584		57.5514	55.0137		64.0679	46.2641		86.5563	52.268		50.0103	39.6482		76.3947	49.9202
27.5		59.9918	59.9757		57.6054	55.0974		64.0999	46.3449		86.6233	52.416		50.122	39.6696		76.4705	50.0781
28		60.0957	60.1927		57.6619	55.1808		64.1297	46.4156		86.6832	52.545		50.2302	39.6795		76.5377	50.2124
28.5		60.1916	60.4079		57.716	55.2638		64.1597	46.4774		86.755	52.6592		50.3402	39.6795		76.5994	50.3256
29		60.2692	60.619		57.7689	55.3475		64.1909	46.533		86.8252	52.7613		50.449	39.6795		76.6585	50.4203
29.5		60.3329	60.8262		57.8222	55.4302		64.2235	46.5832		86.8841	52.8504		50.5538	39.6795		76.7168	50.5016
30		60.3897	61.0346		57.8755	55.5164		64.2592	46.629		86.9143	52.9179		50.6622	39.6795		76.7876	50.5743
30.5		60.4414	61.2427		57.9315	55.6066		64.2945	46.6725		86.9442	52.9831		50.7694	39.6795		76.8631	50.6502
31		60.4883	61.4431		57.9851	55.6957		64.3316	46.7136		87.0045	53.0565		50.8681	39.6795		76.928	50.7274
31.5		60.5351	61.6354		58.0304	55.784		64.3682	46.7516		87.0646	53.1192		50.9579	39.6795		76.9886	50.796
32		60.5783	61.8216		58.0724	55.8714		64.403	46.7866		87.126	53.1728		51.0451	39.6795		77.0486	50.8556
32.5		60.6151	62.0016		58.1138	55.9569		64.4391	46.8183		87.1883	53.2187		51.109	39.6795		77.1123	50.9038
33		60.6323	62.1786		58.1551	56.0406		64.4713	46.8473		87.247	53.2582		51.1732	39.6795		77.1784	50.9428
33.5		60.6501	62.3496		58.1973	56.124		64.5	46.8744		87.309	53.2934		51.2617	39.6795		77.2468	50.9767
34		60.6852	62.5126		58.2337	56.207		64.5333	46.8993		87.3735	53.3242		51.347	39.6795		77.3159	51.0058
34.5		60.7185	62.6703		58.2695	56.2896		64.5662	46.9224		87.4312	53.3517		51.4301	39.6795		77.3898	51.0309
35		60.7526	62.821		58.3061	56.3729		64.5987	46.9443		87.4865	53.3773		51.5092	39.6795		77.4639	51.043
35.5		60.7853	62.9644		58.3381	56.4581		64.6339	46.9655		87.5448	53.4006		51.5865	39.6795		77.5358	51.043
36		60.8117	63.1023		58.3692	56.5437		64.6641	46.9862		87.607	53.4237		51.6608	39.6795		77.6057	51.043
36.5		60.8351	63.2346		58.3961	56.628		64.6929	47.0063		87.666	53.4463		51.7308	39.6795		77.6718	51.043
37		60.8641	63.3621		58.4234	56.7108		64.7236	47.0258		87.7212	53.4566		51.8016	39.6795		77.7356	51.043
37.5		60.8955	63.4843		58.4538	56.7925		64.7546	47.0449		87.78	53.4566		51.8714	39.6795		77.798	51.043
38		60.9192	63.6007		58.4842	56.8738		64.7896	47.0636		87.8382	53.4566		51.9395	39.6795		77.8621	51.043
38.5		60.9403	63.7125		58.5129	56.9553		64.823	47.0826		87.8937	53.4566		52.0031	39.6795		77.9244	51.043
39		60.9658	63.8207		58.5395	57.0385		64.8536	47.1018		87.9516	53.4566		52.0647	39.6795		77.9858	51.043
39.5		60.9957	63.9252		58.5633	57.1225		64.8839	47.1208		88.0123	53.4566		52.1256	39.6795		78.0474	51.043
40		61.0241	64.0251		58.5867	57.2076		64.9097	47.139		88.0687	53.4566		52.1855	39.6795		78.1066	51.043
40.5		61.0521	64.1215		58.6125	57.2946		64.9347	47.1567		88.1228	53.4566		52.244	39.6795		78.1635	51.043
41		61.0806	64.214		58.6377	57.3834		64.9586	47.1742		88.1829	53.4566		52.3051	39.6795		78.2219	51.043
41.5		61.1077	64.3028		58.6605	57.4748		64.9794	47.1827		88.2418	53.4566		52.3667	39.6795		78.2982	51.043
42		61.1364	64.3888		58.682	57.5693		64.9996	47.1827		88.2832	53.4566		52.4195	39.6795		78.3951	51.043
42.5		61.1647	64.4715		58.7062	57.6666		65.0233	47.1827		88.3226	53.4566		52.4698	39.6795		78.4846	51.043
43		61.1946	64.5502		58.7343	57.7674		65.05	47.1827		88.3738	53.4566		52.5187	39.6795		78.555	51.043
43.5		61.2234	64.6269		58.7629	57.8736		65.0764	47.1827		88.4267	53.4566		52.5618	39.6795		78.6166	51.043
44		61.249	64.7023		58.793	57.9867		65.1029	47.1827		88.4794	53.4566		52.6055	39.6795		78.676	51.043
44.5		61.2719	64.7751		58.821	58.1073		65.1289	47.1827		88.5329	53.4566		52.6468	39.6795		78.7345	51.043
45		61.2929	64.8464		58.8449	58.2345		65.153	47.1827		88.5851	53.4566		52.6883	39.6795		78.791	51.043
45.5		61.315	64.9165		58.8682	58.3661		65.1766	47.1827		88.6345	53.4566		52.7304	39.6795		78.8455	51.043
46		61.3394	64.9865		58.8889	58.4918		65.201	47.1827		88.6829	53.4566		52.7692	39.6795		78.8992	51.043
46.5		61.3685	65.0564		58.9078	58.6017		65.2268	47.1827		88.7325	53.4566		52.8071	39.6795		78.952	51.043
47		61.4001	65.1257		58.9271	58.6971		65.253	47.1827		88.7832	53.4566		52.8462	39.6795		79.0032	51.043
47.5		61.4322	65.1966		58.9477	58.7796		65.2767	47.1827		88.8337	53.4566		52.8845	39.6795		79.0559	51.043
48		61.4648	65.2707		58.9697	58.856		65.3015	47.1827		88.8891	53.4566		52.9193	39.6795		79.1126	51.043
[truncated: 5 more columns]
