# Supplementary material for: Integrated culturing, modeling and transcriptomics uncovers complex interactions and emergent behavior in a three-species synthetic gut community
Source: eLife. 2018 Oct 16;7:e37090. doi: 10.7554/eLife.37090 (PMC6237439; doi:10.7554/eLife.37090)
Supplement: Figure 4—source data 1. [file elife-37090-fig4-data1.xlsx]

## Sheet: RI14
Time	RI	FP	BH	fructose	formate	acetate	butyrate	unknown compound	H20	CO2	lag_RI	lag_FP	lag_BH
0.05	2.67155	0	0	49.2449	0.00174436	48.1193	0.016272	30	0.030241	0.0853171	1.03873	0.112733	0.110517		All tables report simulation results for specific fermentation experiments with the kinetic model using parameterization 1.
0.1	2.69834	0	0	49.2295	0.0035388	48.1119	0.0330112	30	0.0463106	0.106743	1.07896	0.127087	0.122141		Experiment identifiers are given as sheet names.
0.15	2.72588	0	0	49.2136	0.00538441	48.1042	0.0502277	30	0.0628385	0.12878	1.12075	0.14327	0.134987		RI: Roseburia intestinalis L1-82
0.2	2.75421	0	0	49.1973	0.00728231	48.0964	0.067932	30	0.0798346	0.151442	1.16416	0.161512	0.149183		FP: Faecalibacterium prausnitzii A2-165
0.25	2.78333	0	0	49.1805	0.00923361	48.0883	0.0861344	30	0.0973089	0.174741	1.20925	0.182078	0.164873		BH: Blautia hydrogenotrophica S5a33
0.3	2.81327	0	0	49.1633	0.0112394	48.08	0.104846	30	0.115272	0.198691	1.25609	0.205261	0.182213
0.35	2.84404	0	0	49.1456	0.013301	48.0714	0.124076	30	0.133733	0.223306	1.30474	0.231397	0.201377
0.4	2.87566	0	0	49.1274	0.0154193	48.0627	0.143837	30	0.152703	0.2486	1.35527	0.26086	0.222556
0.45	2.90814	0	0	49.1086	0.0175957	48.0537	0.164139	30	0.172193	0.274587	1.40776	0.294076	0.245962
0.5	2.94151	0	0	49.0894	0.0198312	48.0444	0.184993	30	0.192213	0.30128	1.46228	0.331521	0.271831
0.55	2.97577	0	0	49.0697	0.0221271	48.0349	0.20641	30	0.212773	0.328693	1.51892	0.373735	0.30042
0.6	3.01096	0	0	49.0494	0.0244846	48.0251	0.228401	30	0.233885	0.356842	1.57775	0.421323	0.332016
0.65	3.04708	0	0	49.0286	0.0269049	48.0151	0.250978	30	0.255559	0.385741	1.63886	0.47497	0.366935
0.7	3.08416	0	0	49.0073	0.0293892	48.0048	0.274153	30	0.277807	0.415405	1.70233	0.535447	0.405526
0.75	3.12222	0	0	48.9853	0.0319387	47.9943	0.297936	30	0.300638	0.445847	1.76827	0.603624	0.448175
0.8	3.16126	0	0	48.9628	0.0345548	47.9835	0.32234	30	0.324066	0.477084	1.83675	0.680482	0.49531
0.85	3.20132	0	0	48.9398	0.0372386	47.9723	0.347375	30	0.3481	0.50913	1.90789	0.767127	0.547403
0.9	3.24241	0	0	48.9161	0.0399915	47.961	0.373055	30	0.372753	0.542	1.98179	0.864805	0.604974
0.95	3.28455	0	0	48.8918	0.0428148	47.9493	0.399392	30	0.398036	0.57571	2.05855	0.974919	0.6686
1	3.32775	0	0	48.867	0.0457097	47.9373	0.426396	30	0.42396	0.610276	2.13828	1.09905	0.738917
1.05	3.37205	0	0	48.8414	0.0486775	47.925	0.454081	30	0.450538	0.645713	2.22109	1.23899	0.81663
1.1	3.41745	0	0	48.8153	0.0517196	47.9124	0.482459	30	0.477781	0.682037	2.30712	1.39675	0.902516
1.15	3.46399	0	0	48.7885	0.0548374	47.8996	0.511543	30	0.505701	0.719264	2.39648	1.5746	0.997434
1.2	3.51167	0	0	48.761	0.0580321	47.8863	0.541344	30	0.534311	0.75741	2.4893	1.77509	1.10234
1.25	3.56052	0	0	48.7329	0.0613052	47.8728	0.571877	30	0.563622	0.796492	2.58571	2.00111	1.21827
1.3	3.61057	0	0	48.7041	0.0646581	47.859	0.603154	30	0.593647	0.836526	2.68586	2.25591	1.3464
1.35	3.66182	0	0	48.6745	0.0680921	47.8448	0.635187	30	0.6244	0.877529	2.78988	2.54315	1.488
1.4	3.7143	0	0	48.6443	0.0716086	47.8302	0.667991	30	0.655891	0.919517	2.89794	2.86697	1.64449
1.45	3.76804	0	0	48.6133	0.0752091	47.8154	0.701578	30	0.688135	0.962509	3.01018	3.23202	1.81745
1.5	3.82306	0	0	48.5817	0.0788951	47.8001	0.735962	30	0.721143	1.00652	3.12677	3.64354	2.00859
1.55	3.87937	0	0	48.5492	0.082668	47.7846	0.771156	30	0.75493	1.05157	3.24787	4.10747	2.21984
1.6	3.937	0	0	48.516	0.0865292	47.7686	0.807175	30	0.789508	1.09767	3.37367	4.63047	2.4533
1.65	3.99597	0	0	48.4821	0.0904803	47.7523	0.844032	30	0.824891	1.14485	3.50433	5.22006	2.71131
1.7	4.05631	0	0	48.4473	0.0945227	47.7356	0.881742	30	0.861092	1.19312	3.64006	5.88472	2.99647
1.75	4.11803	0	0	48.4118	0.0986581	47.7185	0.920318	30	0.898125	1.2425	3.78104	6.63402	3.31161
1.8	4.18116	0	0	48.3754	0.102888	47.7011	0.959775	30	0.936004	1.293	3.92749	7.47872	3.65989
1.85	4.24572	0	0	48.3382	0.107214	47.6833	1.00013	30	0.974743	1.34465	4.07961	8.43097	4.04481
1.9	4.31174	0	0	48.3002	0.111637	47.665	1.04139	30	1.01435	1.39747	4.23761	9.50447	4.47021
1.95	4.37925	0	0	48.2613	0.11616	47.6464	1.08358	30	1.05486	1.45147	4.40174	10.7147	4.94034
2	4.44825	0	0	48.2215	0.120783	47.6273	1.12671	30	1.09626	1.50667	4.57223	12.0789	5.45993
2.05	4.51878	0	0	48.1809	0.125509	47.6078	1.17079	30	1.13858	1.5631	4.74931	13.6169	6.03415
2.1	4.59087	0	0	48.1394	0.130339	47.5879	1.21585	30	1.18183	1.62077	4.93326	15.3508	6.66877
2.15	4.66454	0	0	48.097	0.135274	47.5676	1.26189	30	1.22603	1.6797	5.12433	17.3054	7.37014
2.2	4.73981	0	0	48.0536	0.140317	47.5468	1.30893	30	1.27119	1.73992	5.3228	19.5088	8.14526
2.25	4.81671	0	0	48.0093	0.14547	47.5256	1.35699	30	1.31733	1.80144	5.52896	21.9929	9.00191
2.3	4.89526	0	0	47.9641	0.150733	47.5039	1.40609	30	1.36447	1.86428	5.74311	24.7932	9.94865
2.35	4.9755	0	0	47.9179	0.156108	47.4818	1.45624	30	1.41261	1.92847	5.96554	27.9501	10.995
2.4	5.05744	0	0	47.8707	0.161599	47.4592	1.50745	30	1.46177	1.99403	6.1966	31.5089	12.1513
2.45	5.14112	0	0	47.8225	0.167205	47.4361	1.55975	30	1.51198	2.06097	6.4366	35.5209	13.4293
2.5	5.22656	0	0	47.7732	0.17293	47.4126	1.61315	30	1.56324	2.12932	6.6859	40.0437	14.8417
2.55	5.31378	0	0	47.723	0.178774	47.3885	1.66767	30	1.61558	2.1991	6.94485	45.1424	16.4026
2.6	5.40283	0	0	47.6717	0.18474	47.364	1.72332	30	1.66901	2.27034	7.21383	50.8903	18.1277
2.65	5.49372	0	0	47.6194	0.190829	47.339	1.78013	30	1.72354	2.34305	7.49323	57.3701	20.0342
2.7	5.58648	0	0	47.5659	0.197045	47.3134	1.8381	30	1.7792	2.41726	7.78345	64.675	22.1412
2.75	5.68115	0	0	47.5114	0.203387	47.2874	1.89727	30	1.836	2.49299	8.08492	72.9099	24.4698
2.8	5.77774	0	0	47.4558	0.209859	47.2608	1.95764	30	1.89395	2.57027	8.39806	82.1935	27.0433
2.85	5.8763	0	0	47.399	0.216462	47.2337	2.01924	30	1.95309	2.64911	8.72332	92.659	29.8875
2.9	5.97684	0	0	47.3411	0.223199	47.206	2.08208	30	2.01341	2.72955	9.06119	104.457	33.0308
2.95	6.07941	0	0	47.282	0.230071	47.1778	2.14618	30	2.07495	2.8116	9.41214	117.758	36.5047
3	6.18402	0	0	47.2217	0.23708	47.1491	2.21156	30	2.13772	2.89529	9.77668	132.751	40.3439
3.05	6.29072	0	0	47.1603	0.244228	47.1198	2.27825	30	2.20174	2.98065	10.1553	149.654	44.5869
3.1	6.39952	0	0	47.0976	0.251518	47.0899	2.34625	30	2.26702	3.06769	10.5487	168.71	49.2762
3.15	6.51047	0	0	47.0337	0.258952	47.0594	2.4156	30	2.33359	3.15645	10.9572	190.191	54.4586
3.2	6.6236	0	0	46.9685	0.266531	47.0284	2.4863	30	2.40147	3.24695	11.3816	214.408	60.1861
3.25	6.73893	0	0	46.9021	0.274258	46.9967	2.55838	30	2.47067	3.33922	11.8224	241.708	66.516
3.3	6.8565	0	0	46.8344	0.282136	46.9645	2.63186	30	2.54121	3.43327	12.2803	272.485	73.5115
3.35	6.97634	0	0	46.7654	0.290165	46.9316	2.70676	30	2.61311	3.52914	12.756	307.18	81.2428
3.4	7.09848	0	0	46.695	0.298348	46.8982	2.7831	30	2.6864	3.62686	13.25	346.293	89.7872
3.45	7.22296	0	0	46.6233	0.306689	46.8641	2.8609	30	2.76109	3.72644	13.7632	390.386	99.2302
3.5	7.34981	0	0	46.5502	0.315188	46.8293	2.94018	30	2.8372	3.82792	14.2963	440.093	109.666
3.55	7.47907	0	0	46.4758	0.323848	46.7939	3.02097	30	2.91475	3.93133	14.85	496.129	121.2
3.6	7.61076	0	0	46.3999	0.332671	46.7579	3.10328	30	2.99377	4.03668	15.4252	559.301	133.947
3.65	7.74493	0	0	46.3227	0.34166	46.7212	3.18713	30	3.07426	4.14402	16.0226	630.516	148.034
3.7	7.8816	0	0	46.2439	0.350817	46.6838	3.27255	30	3.15627	4.25335	16.6432	710.798	163.603
3.75	8.02081	0	0	46.1637	0.360145	46.6458	3.35956	30	3.2398	4.36472	17.2878	801.303	180.81
3.8	8.1626	0	0	46.0821	0.369645	46.607	3.44818	30	3.32487	4.47816	17.9574	903.332	199.826
3.85	8.30701	0	0	45.9989	0.37932	46.5676	3.53843	30	3.41151	4.59368	18.6529	1018.35	220.841
3.9	8.45406	0	0	45.9142	0.389172	46.5275	3.63034	30	3.49974	4.71132	19.3753	1148.02	244.068
3.95	8.60379	0	0	45.828	0.399204	46.4866	3.72392	30	3.58958	4.83111	20.1258	1294.19	269.736
4	8.75624	0	0	45.7401	0.409419	46.445	3.8192	30	3.68106	4.95307	20.9052	1458.98	298.105
4.05	8.91145	0	0	45.6507	0.419818	46.4027	3.91621	30	3.77418	5.07724	21.7149	1644.75	329.457
4.1	9.06945	0	0	45.5597	0.430404	46.3597	4.01496	30	3.86898	5.20364	22.556	1854.17	364.106
4.15	9.23028	0	0	45.4671	0.441179	46.3159	4.11548	30	3.96548	5.3323	23.4296	2090.26	402.4
4.2	9.39398	0	0	45.3728	0.452147	46.2713	4.21779	30	4.06369	5.46326	24.3371	2356.41	444.721
4.25	9.56057	0	0	45.2768	0.463309	46.226	4.32191	30	4.16365	5.59653	25.2797	2656.45	491.493
4.3	9.73011	0	0	45.1792	0.474668	46.1799	4.42787	30	4.26537	5.73216	26.2588	2994.69	543.184
4.35	9.90262	0	0	45.0798	0.486226	46.133	4.53569	30	4.36888	5.87017	27.2758	3376	600.311
4.4	10.0781	0	0	44.9787	0.497986	46.0854	4.64539	30	4.4742	6.01059	28.3322	3805.87	663.446
4.45	10.2567	0	0	44.8759	0.509951	46.0369	4.757	30	4.58134	6.15345	29.4296	4290.46	733.222
4.5	10.4384	0	0	44.7712	0.522122	45.9876	4.87054	30	4.69034	6.29878	30.5694	4836.76	810.335
4.55	10.6232	0	0	44.6648	0.534503	45.9375	4.98603	30	4.80121	6.44661	31.7534	5452.62	895.559
4.6	10.8111	0	0	44.5565	0.547096	45.8865	5.1035	30	4.91398	6.59697	32.9833	6146.89	989.746
4.65	11.0023	0	0	44.4464	0.559903	45.8348	5.22297	30	5.02867	6.7499	34.2607	6929.56	1093.84
4.7	11.1967	0	0	44.3345	0.572927	45.7822	5.34447	30	5.14531	6.90541	35.5877	7811.9	1208.88
4.75	11.3943	0	0	44.2206	0.58617	45.7287	5.46801	30	5.26391	7.06354	36.9661	8806.57	1336.02
4.8	11.5953	0	0	44.1048	0.599636	45.6743	5.59362	30	5.38449	7.22432	38.3978	9927.9	1476.53
4.85	11.7996	0	0	43.9871	0.613326	45.6191	5.72132	30	5.50709	7.38778	39.885	11192	1631.82
4.9	12.0073	0	0	43.8675	0.627242	45.5631	5.85114	30	5.63172	7.55395	41.4298	12617.1	1803.44
4.95	12.2185	0	0	43.7459	0.641389	45.5061	5.9831	30	5.7584	7.72286	43.0344	14223.6	1993.11
5	12.4331	0	0	43.6223	0.655766	45.4482	6.11722	30	5.88715	7.89454	44.7012	16034.7	2202.73
5.05	12.6512	0	0	43.4967	0.670379	45.3894	6.25353	30	6.01801	8.06901	46.4325	18076.3	2434.39
5.1	12.8728	0	0	43.369	0.685227	45.3298	6.39205	30	6.15098	8.24631	48.2309	20378	2690.42
5.15	13.098	0	0	43.2393	0.700315	45.2692	6.53279	30	6.2861	8.42646	50.099	22972.6	2973.37
5.2	13.3268	0	0	43.1075	0.715645	45.2076	6.67579	30	6.42338	8.6095	52.0394	25897.7	3286.08
5.25	13.5592	0	0	42.9736	0.731218	45.1452	6.82106	30	6.56284	8.79545	54.0549	29195.2	3631.69
5.3	13.7953	0	0	42.8376	0.747038	45.0818	6.96863	30	6.70451	8.98434	56.1485	32912.6	4013.63
5.35	14.0352	0	0	42.6995	0.763105	45.0174	7.11852	30	6.8484	9.1762	58.3232	37103.3	4435.75
5.4	14.2787	0	0	42.5592	0.779424	44.9521	7.27075	30	6.99454	9.37105	60.5821	41827.7	4902.27
5.45	14.5261	0	0	42.4167	0.795996	44.8858	7.42534	30	7.14294	9.56892	62.9286	47153.5	5417.84
5.5	14.7772	0	0	42.2721	0.812823	44.8186	7.5823	30	7.29363	9.76984	65.3659	53157.5	5987.65
5.55	15.0322	0	0	42.1252	0.829907	44.7504	7.74167	30	7.44663	9.97383	67.8976	59926	6617.37
5.6	15.2911	0	0	41.9761	0.847251	44.6812	7.90347	30	7.60195	10.1809	70.5273	67556.3	7313.33
5.65	15.5538	0	0	41.8247	0.864857	44.611	8.0677	30	7.75961	10.3911	73.2589	76158.1	8082.48
5.7	15.8205	0	0	41.6711	0.882726	44.5399	8.23439	30	7.91963	10.6045	76.0963	85855.2	8932.53
5.75	16.0912	0	0	41.5152	0.900861	44.4677	8.40356	30	8.08204	10.821	79.0437	96787	9871.97
5.8	16.3659	0	0	41.357	0.919264	44.3946	8.57522	30	8.24683	11.0408	82.1051	100000	10910.2
5.85	16.6446	0	0	41.1965	0.937936	44.3204	8.7494	30	8.41405	11.2637	85.2852	100000	12057.7
5.9	16.9273	0	0	41.0336	0.956879	44.2452	8.92611	30	8.58369	11.4899	88.5884	100000	13325.9
5.95	17.2141	0	0	40.8684	0.976096	44.169	9.10537	30	8.75578	11.7194	92.0195	100000	14727.5
6	17.505	0	0	40.7008	0.995587	44.0918	9.28719	30	8.93032	11.9521	95.5836	100000	16276.5
6.05	17.8001	0	0	40.5309	1.01535	44.0136	9.47159	30	9.10735	12.1881	99.2856	100000	17988.4
6.1	18.0993	0	0	40.3586	1.0354	43.9343	9.65858	30	9.28686	12.4275	103.131	100000	19880.4
6.15	18.4026	0	0	40.1838	1.05572	43.854	9.84818	30	9.46887	12.6702	107.126	100000	21971.3
6.2	18.7102	0	0	40.0067	1.07633	43.7727	10.0404	30	9.6534	12.9162	111.275	100000	24282.2
6.25	19.0219	0	0	39.8271	1.09722	43.6904	10.2352	30	9.84045	13.1656	115.584	100000	26836.2
6.3	19.3379	0	0	39.6451	1.11839	43.607	10.4327	30	10.03	13.4184	120.061	100000	29658.7
6.35	19.6581	0	0	39.4607	1.13984	43.5226	10.6329	30	10.2222	13.6746	124.711	100000	32778.2
6.4	19.9826	0	0	39.2737	1.16159	43.4371	10.8357	30	10.4169	13.9342	129.542	100000	36225.7
6.45	20.3114	0	0	39.0844	1.18361	43.3507	11.0412	30	10.6141	14.1972	134.559	100000	40035.8
6.5	20.6444	0	0	38.8925	1.20593	43.2632	11.2493	30	10.814	14.4636	139.771	100000	44246.7
6.55	20.9818	0	0	38.6982	1.22853	43.1746	11.4602	30	11.0164	14.7335	145.184	100000	48900.5
6.6	21.3234	0	0	38.5014	1.25142	43.085	11.6737	30	11.2214	15.0068	150.807	100000	54043.7
6.65	21.6694	0	0	38.3022	1.2746	42.9944	11.8899	30	11.4289	15.2836	156.648	100000	59727.9
6.7	22.0197	0	0	38.1004	1.29807	42.9028	12.1089	30	11.6391	15.5638	162.715	100000	66009.9
6.75	22.3743	0	0	37.8961	1.32183	42.8102	12.3305	30	11.8519	15.8475	169.018	100000	72952.7
6.8	22.7332	0	0	37.6894	1.34588	42.7165	12.5548	30	12.0672	16.1347	175.564	100000	80625.7
6.85	23.0965	0	0	37.4802	1.37021	42.6218	12.7818	30	12.2852	16.4253	182.364	100000	89105.7
6.9	23.4641	0	0	37.2684	1.39484	42.5261	13.0116	30	12.5057	16.7193	189.427	100000	98477.5
6.95	23.836	0	0	37.0542	1.41976	42.4294	13.244	30	12.7289	17.0168	196.764	100000	100001
7	24.2122	0	0	36.8375	1.44496	42.3317	13.4791	30	12.9546	17.3178	204.386	100000	100001
7.05	24.5927	0	0	36.6184	1.47046	42.233	13.717	30	13.1829	17.6222	212.302	100000	100001
7.1	24.9774	0	0	36.3967	1.49624	42.1333	13.9575	30	13.4138	17.93	220.525	100000	100001
7.15	25.3665	0	0	36.1726	1.52231	42.0327	14.2006	30	13.6472	18.2413	229.066	100000	100001
7.2	25.7598	0	0	35.9461	1.54866	41.9311	14.4465	30	13.8832	18.5559	237.938	100000	100001
7.25	26.1574	0	0	35.7171	1.5753	41.8285	14.6949	30	14.1218	18.874	247.154	100000	100001
7.3	26.5592	0	0	35.4856	1.60222	41.725	14.9461	30	14.3628	19.1954	256.727	100000	100001
7.35	26.9652	0	0	35.2518	1.62942	41.6205	15.1998	30	14.6064	19.5202	266.671	100000	100001
7.4	27.3753	0	0	35.0155	1.6569	41.5151	15.4561	30	14.8525	19.8484	276.999	100000	100001
7.45	27.7896	0	0	34.7769	1.68466	41.4088	15.7151	30	15.1011	20.1798	287.728	100000	100001
7.5	28.2081	0	0	34.5359	1.71269	41.3016	15.9766	30	15.3521	20.5145	298.873	100000	100001
7.55	28.6305	0	0	34.2925	1.741	41.1934	16.2406	30	15.6056	20.8525	310.449	100000	100001
7.6	29.0571	0	0	34.0469	1.76957	41.0845	16.5072	30	15.8615	21.1937	322.474	100000	100001
7.65	29.4876	0	0	33.7989	1.79842	40.9746	16.7763	30	16.1199	21.5381	334.964	100000	100001
7.7	29.9221	0	0	33.5486	1.82753	40.8639	17.0478	30	16.3805	21.8857	347.939	100000	100001
7.75	30.3605	0	0	33.2961	1.8569	40.7524	17.3218	30	16.6436	22.2364	361.415	100000	100001
7.8	30.8027	0	0	33.0414	1.88653	40.6401	17.5982	30	16.9089	22.5902	375.413	100000	100001
7.85	31.2488	0	0	32.7845	1.91642	40.527	17.877	30	17.1766	22.9471	389.954	100000	100001
7.9	31.6986	0	0	32.5254	1.94655	40.4131	18.1582	30	17.4465	23.3069	405.057	100000	100001
7.95	32.1521	0	0	32.2641	1.97694	40.2984	18.4416	30	17.7186	23.6697	420.746	100000	100001
8	32.6092	0	0	32.0008	2.00757	40.183	18.7273	30	17.9928	24.0355	437.042	100000	100001
8.05	33.0699	0	0	31.7355	2.03844	40.0669	19.0153	30	18.2693	24.404	453.969	100000	100001
8.1	33.5342	0	0	31.4681	2.06954	39.9501	19.3054	30	18.5478	24.7754	471.552	100000	100001
8.15	34.0018	0	0	31.1987	2.10087	39.8326	19.5977	30	18.8284	25.1495	489.816	100000	100001
8.2	34.4728	0	0	30.9274	2.13243	39.7145	19.8921	30	19.111	25.5263	508.787	100000	100001
8.25	34.9471	0	0	30.6542	2.16421	39.5958	20.1885	30	19.3956	25.9057	528.493	100000	100001
8.3	35.4246	0	0	30.3792	2.1962	39.4764	20.4869	30	19.6821	26.2877	548.962	100000	100001
8.35	35.9052	0	0	30.1024	2.2284	39.3565	20.7873	30	19.9704	26.6722	570.224	100000	100001
8.4	36.3888	0	0	29.8238	2.2608	39.236	21.0895	30	20.2606	27.0591	592.31	100000	100001
8.45	36.8754	0	0	29.5435	2.2934	39.1151	21.3937	30	20.5525	27.4484	615.251	100000	100001
8.5	37.3648	0	0	29.2616	2.32619	38.9936	21.6995	30	20.8462	27.8399	639.081	100000	100001
8.55	37.8569	0	0	28.9781	2.35917	38.8716	22.0071	30	21.1415	28.2336	663.834	100000	100001
8.6	38.3518	0	0	28.6931	2.39232	38.7492	22.3164	30	21.4384	28.6295	689.546	100000	100001
8.65	38.8491	0	0	28.4066	2.42564	38.6264	22.6272	30	21.7368	29.0274	716.254	100000	100001
8.7	39.3489	0	0	28.1188	2.45913	38.5032	22.9396	30	22.0367	29.4272	743.996	100000	100001
8.75	39.8511	0	0	27.8295	2.49277	38.3797	23.2535	30	22.3379	29.8289	772.812	100000	100001
8.8	40.3554	0	0	27.539	2.52656	38.2558	23.5687	30	22.6406	30.2324	802.745	100000	100001
8.85	40.8619	0	0	27.2473	2.5605	38.1317	23.8852	30	22.9444	30.6376	833.837	100000	100001
8.9	41.3704	0	0	26.9544	2.59456	38.0073	24.203	30	23.2495	31.0444	866.134	100000	100001
8.95	41.8807	0	0	26.6605	2.62876	37.8827	24.522	30	23.5557	31.4526	899.68	100000	100001
9	42.3928	0	0	26.3655	2.66307	37.7578	24.842	30	23.863	31.8623	934.527	100000	100001
9.05	42.9065	0	0	26.0696	2.69749	37.6328	25.1631	30	24.1712	32.2733	970.722	100000	100001
9.1	43.4217	0	0	25.7728	2.732	37.5077	25.4851	30	24.4803	32.6854	1008.32	100000	100001
9.15	43.9383	0	0	25.4753	2.76662	37.3825	25.808	30	24.7903	33.0987	1047.37	100000	100001
9.2	44.4561	0	0	25.177	2.80131	37.2573	26.1316	30	25.101	33.5129	1087.94	100000	100001
9.25	44.975	0	0	24.8781	2.83608	37.132	26.4559	30	25.4123	33.9281	1130.08	100000	100001
9.3	45.4949	0	0	24.5787	2.87091	37.0067	26.7809	30	25.7242	34.344	1173.85	100000	100001
9.35	46.0156	0	0	24.2788	2.90579	36.8815	27.1063	30	26.0367	34.7605	1219.31	100000	100001
9.4	46.537	0	0	23.9784	2.94073	36.7563	27.4322	30	26.3495	35.1777	1266.54	100000	100001
9.45	47.0589	0	0	23.6778	2.9757	36.6313	27.7584	30	26.6627	35.5952	1315.59	100000	100001
9.5	47.5813	0	0	23.3769	3.01069	36.5064	28.0848	30	26.9761	36.0131	1366.54	100000	100001
9.55	48.1038	0	0	23.0759	3.04571	36.3817	28.4115	30	27.2896	36.4312	1419.47	100000	100001
9.6	48.6266	0	0	22.7748	3.08073	36.2573	28.7381	30	27.6032	36.8493	1474.45	100000	100001
9.65	49.1492	0	0	22.4738	3.11575	36.133	29.0648	30	27.9168	37.2674	1531.56	100000	100001
9.7	49.6717	0	0	22.1728	3.15075	36.0091	29.3914	30	28.2303	37.6854	1590.88	100000	100001
9.75	50.1938	0	0	21.8721	3.18574	35.8855	29.7177	30	28.5436	38.1031	1652.49	100000	100001
9.8	50.7155	0	0	21.5716	3.22069	35.7623	30.0437	30	28.8566	38.5205	1716.5	100000	100001
9.85	51.2365	0	0	21.2715	3.2556	35.6394	30.3694	30	29.1692	38.9373	1782.98	100000	100001
9.9	51.7568	0	0	20.9718	3.29045	35.517	30.6945	30	29.4814	39.3535	1852.04	100000	100001
9.95	52.2761	0	0	20.6727	3.32525	35.3951	31.0191	30	29.793	39.7689	1923.77	100000	100001
10	52.7943	0	0	20.3742	3.35997	35.2737	31.343	30	30.1039	40.1835	1998.28	100000	100001
10.05	53.3113	0	0	20.0764	3.3946	35.1527	31.6661	30	30.4141	40.5971	2075.67	100000	100001
10.1	53.8269	0	0	19.7795	3.42915	35.0324	31.9883	30	30.7234	41.0096	2156.07	100000	100001
10.15	54.3409	0	0	19.4834	3.46359	34.9127	32.3096	30	31.0319	41.4208	2239.58	100000	100001
10.2	54.8533	0	0	19.1883	3.49792	34.7936	32.6298	30	31.3393	41.8307	2326.32	100000	100001
10.25	55.3638	0	0	18.8942	3.53212	34.6751	32.9489	30	31.6456	42.2391	2416.42	100000	100001
10.3	55.8723	0	0	18.6013	3.5662	34.5574	33.2668	30	31.9507	42.6459	2510.01	100000	100001
10.35	56.3788	0	0	18.3096	3.60013	34.4404	33.5833	30	32.2546	43.0511	2607.23	100000	100001
10.4	56.8829	0	0	18.0192	3.6339	34.3241	33.8984	30	32.557	43.4544	2708.21	100000	100001
10.45	57.3846	0	0	17.7302	3.66752	34.2087	34.2119	30	32.8581	43.8558	2813.1	100000	100001
10.5	57.8838	0	0	17.4427	3.70096	34.094	34.5239	30	33.1576	44.2551	2922.05	100000	100001
10.55	58.3803	0	0	17.1567	3.73423	33.9802	34.8342	30	33.4555	44.6523	3035.23	100000	100001
10.6	58.8739	0	0	16.8724	3.7673	33.8673	35.1427	30	33.7517	45.0472	3152.79	100000	100001
10.65	59.3646	0	0	16.5897	3.80018	33.7553	35.4494	30	34.0461	45.4397	3274.9	100000	100001
10.7	59.8522	0	0	16.3089	3.83284	33.6442	35.7542	30	34.3386	45.8298	3401.74	100000	100001
10.75	60.3365	0	0	16.0299	3.8653	33.534	36.0569	30	34.6292	46.2173	3533.49	100000	100001
10.8	60.8175	0	0	15.7529	3.89752	33.4249	36.3575	30	34.9178	46.6021	3670.35	100000	100001
10.85	61.295	0	0	15.4778	3.92951	33.3167	36.6559	30	35.2043	46.9841	3812.51	100000	100001
10.9	61.7689	0	0	15.2049	3.96127	33.2096	36.9521	30	35.4886	47.3632	3960.17	100000	100001
10.95	62.2391	0	0	14.934	3.99277	33.1035	37.246	30	35.7708	47.7393	4113.55	100000	100001
11	62.7054	0	0	14.6654	4.02401	32.9985	37.5374	30	36.0506	48.1124	4272.88	100000	100001
11.05	63.1678	0	0	14.3991	4.055	32.8945	37.8264	30	36.328	48.4823	4438.37	100000	100001
11.1	63.6262	0	0	14.1351	4.0857	32.7917	38.1129	30	36.603	48.849	4610.27	100000	100001
11.15	64.0804	0	0	13.8734	4.11614	32.69	38.3968	30	36.8755	49.2124	4788.84	100000	100001
11.2	64.5303	0	0	13.6143	4.14628	32.5894	38.678	30	37.1455	49.5723	4974.31	100000	100001
11.25	64.9759	0	0	13.3576	4.17614	32.49	38.9565	30	37.4128	49.9288	5166.98	100000	100001
11.3	65.417	0	0	13.1035	4.20569	32.3918	39.2322	30	37.6775	50.2817	5367.1	100000	100001
11.35	65.8536	0	0	12.852	4.23494	32.2947	39.5051	30	37.9395	50.631	5574.97	100000	100001
11.4	66.2856	0	0	12.6032	4.26389	32.1989	39.7751	30	38.1987	50.9766	5790.9	100000	100001
11.45	66.7129	0	0	12.3571	4.29252	32.1043	40.0421	30	38.4551	51.3184	6015.19	100000	100001
11.5	67.1354	0	0	12.1137	4.32082	32.0109	40.3062	30	38.7086	51.6564	6248.16	100000	100001
11.55	67.5531	0	0	11.8732	4.34881	31.9187	40.5672	30	38.9592	51.9905	6490.16	100000	100001
11.6	67.9658	0	0	11.6354	4.37646	31.8278	40.8252	30	39.2068	52.3208	6741.54	100000	100001
11.65	68.3736	0	0	11.4005	4.40378	31.7381	41.0801	30	39.4515	52.647	7002.64	100000	100001
11.7	68.7764	0	0	11.1685	4.43077	31.6497	41.3318	30	39.6931	52.9692	7273.87	100000	100001
11.75	69.174	0	0	10.9395	4.45741	31.5625	41.5803	30	39.9317	53.2873	7555.59	100000	100001
11.8	69.5665	0	0	10.7134	4.48371	31.4766	41.8256	30	40.1672	53.6013	7848.23	100000	100001
11.85	69.9539	0	0	10.4903	4.50966	31.392	42.0677	30	40.3996	53.9112	8152.2	100000	100001
11.9	70.336	0	0	10.2702	4.53526	31.3087	42.3065	30	40.6289	54.2169	8467.95	100000	100001
11.95	70.7128	0	0	10.0532	4.56051	31.2267	42.5421	30	40.855	54.5183	8795.92	100000	100001
12	71.0844	0	0	9.83914	4.5854	31.1459	42.7743	30	41.0779	54.8156	9136.6	100000	100001
12.05	71.4506	0	0	9.6282	4.60994	31.0664	43.0032	30	41.2977	55.1085	9490.47	100000	100001
12.1	71.8115	0	0	9.42033	4.63412	30.9882	43.2287	30	41.5142	55.3972	9858.05	100000	100001
12.15	72.167	0	0	9.21556	4.65794	30.9113	43.4509	30	41.7275	55.6817	10239.9	100000	100001
12.2	72.5171	0	0	9.01389	4.6814	30.8357	43.6697	30	41.9376	55.9618	10636.5	100000	100001
12.25	72.8618	0	0	8.81532	4.70449	30.7613	43.8852	30	42.1444	56.2375	11048.4	100000	100001
12.3	73.2012	0	0	8.61987	4.72723	30.6882	44.0973	30	42.348	56.509	11476.4	100000	100001
12.35	73.5351	0	0	8.42753	4.7496	30.6164	44.306	30	42.5484	56.7761	11920.8	100000	100001
12.4	73.8636	0	0	8.23831	4.77161	30.5459	44.5113	30	42.7455	57.0389	12382.6	100000	100001
12.45	74.1867	0	0	8.0522	4.79326	30.4766	44.7132	30	42.9393	57.2974	12862.1	100000	100001
12.5	74.5044	0	0	7.8692	4.81455	30.4086	44.9118	30	43.1299	57.5516	13360.3	100000	100001
12.55	74.8167	0	0	7.6893	4.83547	30.3418	45.107	30	43.3173	57.8015	13877.8	100000	100001
12.6	75.1237	0	0	7.5125	4.85604	30.2762	45.2988	30	43.5015	58.047	14415.3	100000	100001
12.65	75.4253	0	0	7.33878	4.87624	30.2119	45.4873	30	43.6825	58.2883	14973.6	100000	100001
12.7	75.7215	0	0	7.16813	4.89609	30.1488	45.6725	30	43.8602	58.5253	15553.6	100000	100001
12.75	76.0125	0	0	7.00055	4.91559	30.0869	45.8544	30	44.0348	58.7581	16156	100000	100001
12.8	76.2982	0	0	6.836	4.93473	30.0262	46.0329	30	44.2062	58.9866	16781.7	100000	100001
12.85	76.5786	0	0	6.67448	4.95351	29.9667	46.2082	30	44.3744	59.2109	17431.7	100000	100001
12.9	76.8538	0	0	6.51597	4.97195	29.9084	46.3802	30	44.5396	59.4311	18106.8	100000	100001
12.95	77.1238	0	0	6.36045	4.99004	29.8513	46.5489	30	44.7016	59.6471	18808.1	100000	100001
13	77.3886	0	0	6.20789	5.00779	29.7953	46.7144	30	44.8605	59.859	19536.6	100000	100001
13.05	77.6484	0	0	6.05827	5.02519	29.7404	46.8768	30	45.0163	60.0668	20293.3	100000	100001
13.1	77.9031	0	0	5.91157	5.04226	29.6867	47.036	30	45.1691	60.2705	21079.3	100000	100001
13.15	78.1527	0	0	5.76776	5.05898	29.6341	47.192	30	45.3189	60.4703	21895.7	100000	100001
13.2	78.3974	0	0	5.62682	5.07538	29.5826	47.3449	30	45.4658	60.666	22743.7	100000	100001
13.25	78.6372	0	0	5.48872	5.09144	29.5322	47.4948	30	45.6096	60.8578	23624.6	100000	100001
13.3	78.8721	0	0	5.35342	5.10718	29.4829	47.6416	30	45.7506	61.0457	24539.6	100000	100001
13.35	79.1021	0	0	5.2209	5.12259	29.4346	47.7854	30	45.8886	61.2298	25490.1	100000	100001
13.4	79.3274	0	0	5.09113	5.13769	29.3874	47.9262	30	46.0238	61.41	26477.4	100000	100001
13.45	79.548	0	0	4.96407	5.15247	29.3413	48.0641	30	46.1561	61.5865	27502.9	100000	100001
13.5	79.764	0	0	4.83969	5.16694	29.2961	48.199	30	46.2857	61.7592	28568.1	100000	100001
13.55	79.9753	0	0	4.71796	5.1811	29.2519	48.3311	30	46.4125	61.9283	29674.6	100000	100001
13.6	80.1821	0	0	4.59885	5.19495	29.2088	48.4604	30	46.5366	62.0938	30823.9	100000	100001
13.65	80.3844	0	0	4.48231	5.20851	29.1666	48.5868	30	46.658	62.2556	32017.7	100000	100001
13.7	80.5823	0	0	4.36832	5.22177	29.1253	48.7105	30	46.7767	62.4139	33257.8	100000	100001
13.75	80.7759	0	0	4.25684	5.23473	29.085	48.8315	30	46.8928	62.5688	34545.9	100000	100001
13.8	80.9651	0	0	4.14783	5.24741	29.0457	48.9498	30	47.0064	62.7202	35884	100000	100001
13.85	81.1501	0	0	4.04125	5.25981	29.0072	49.0654	30	47.1174	62.8682	37273.8	100000	100001
13.9	81.331	0	0	3.93707	5.27193	28.9697	49.1784	30	47.2259	63.0129	38717.4	100000	100001
13.95	81.5078	0	0	3.83526	5.28377	28.933	49.2889	30	47.332	63.1543	40217	100000	100001
14	81.6805	0	0	3.73576	5.29534	28.8972	49.3969	30	47.4356	63.2925	41774.7	100000	100001
14.05	81.8493	0	0	3.63856	5.30665	28.8622	49.5023	30	47.5369	63.4275	43392.7	100000	100001
14.1	82.0141	0	0	3.5436	5.3177	28.8281	49.6054	30	47.6358	63.5594	45073.3	100000	100001
14.15	82.1752	0	0	3.45085	5.32849	28.7948	49.706	30	47.7324	63.6882	46819.1	100000	100001
14.2	82.3324	0	0	3.36027	5.33902	28.7623	49.8043	30	47.8268	63.814	48632.4	100000	100001
14.25	82.486	0	0	3.27183	5.34931	28.7306	49.9003	30	47.9189	63.9368	50516	100000	100001
14.3	82.6359	0	0	3.18548	5.35935	28.6996	49.994	30	48.0088	64.0568	52472.6	100000	100001
14.35	82.7822	0	0	3.10119	5.36916	28.6695	50.0854	30	48.0966	64.1738	54504.9	100000	100001
14.4	82.925	0	0	3.01892	5.37873	28.64	50.1747	30	48.1823	64.2881	56616	100000	100001
14.45	83.0644	0	0	2.93863	5.38807	28.6113	50.2618	30	48.266	64.3996	58808.8	100000	100001
14.5	83.2004	0	0	2.86029	5.39718	28.5833	50.3468	30	48.3476	64.5084	61086.5	100000	100001
14.55	83.3331	0	0	2.78385	5.40607	28.556	50.4298	30	48.4272	64.6146	63452.5	100000	100001
14.6	83.4626	0	0	2.70929	5.41474	28.5294	50.5107	30	48.5049	64.7181	65910.1	100000	100001
14.65	83.5889	0	0	2.63655	5.4232	28.5034	50.5896	30	48.5806	64.8192	68462.8	100000	100001
14.7	83.712	0	0	2.56562	5.43145	28.4781	50.6666	30	48.6545	64.9177	71114.5	100000	100001
14.75	83.8321	0	0	2.49644	5.4395	28.4535	50.7416	30	48.7266	65.0138	73868.9	100000	100001
14.8	83.9492	0	0	2.42899	5.44735	28.4295	50.8148	30	48.7968	65.1074	76729.9	100000	100001
14.85	84.0634	0	0	2.36323	5.455	28.4061	50.8862	30	48.8653	65.1988	79701.7	100000	100001
14.9	84.1747	0	0	2.29912	5.46245	28.3832	50.9557	30	48.9321	65.2878	82788.7	100000	100001
14.95	84.2832	0	0	2.23664	5.46972	28.361	51.0235	30	48.9972	65.3746	85995.2	100000	100001
15	84.3889	0	0	2.17573	5.47681	28.3394	51.0896	30	49.0606	65.4592	89325.9	100000	100001
15.05	84.4919	0	0	2.11637	5.48371	28.3183	51.154	30	49.1225	65.5416	92785.6	100000	100001
15.1	84.5924	0	0	2.05853	5.49044	28.2978	51.2168	30	49.1827	65.622	96379.3	100000	100001
15.15	84.6902	0	0	2.00218	5.49699	28.2778	51.2779	30	49.2414	65.7002	100000	100000	100001
15.2	84.7855	0	0	1.94727	5.50338	28.2583	51.3375	30	49.2986	65.7765	100001	100000	100001
15.25	84.8784	0	0	1.89378	5.5096	28.2393	51.3955	30	49.3543	65.8508	100001	100000	100001
15.3	84.9689	0	0	1.84167	5.51566	28.2208	51.4521	30	49.4086	65.9232	100001	100000	100001
15.35	85.057	0	0	1.79093	5.52157	28.2029	51.5072	30	49.4615	65.9936	100001	100000	100001
15.4	85.1428	0	0	1.7415	5.52732	28.1854	51.5608	30	49.513	66.0623	100001	100000	100001
15.45	85.2263	0	0	1.69337	5.53291	28.1683	51.613	30	49.5631	66.1291	100001	100000	100001
15.5	85.3077	0	0	1.6465	5.53837	28.1517	51.6639	30	49.6119	66.1942	100001	100000	100001
15.55	85.3869	0	0	1.60087	5.54367	28.1356	51.7134	30	49.6595	66.2576	100001	100000	100001
15.6	85.4641	0	0	1.55644	5.54884	28.1199	51.7616	30	49.7057	66.3193	100001	100000	100001
15.65	85.5392	0	0	1.51319	5.55387	28.1046	51.8085	30	49.7508	66.3794	100001	100000	100001
15.7	85.6123	0	0	1.47108	5.55877	28.0897	51.8542	30	49.7947	66.4379	100001	100000	100001
15.75	85.6834	0	0	1.43009	5.56354	28.0752	51.8987	30	49.8374	66.4948	100001	100000	100001
15.8	85.7527	0	0	1.3902	5.56818	28.0611	51.942	30	49.8789	66.5502	100001	100000	100001
15.85	85.8201	0	0	1.35137	5.5727	28.0474	51.9841	30	49.9194	66.6041	100001	100000	100001
15.9	85.8857	0	0	1.31358	5.57709	28.0341	52.0251	30	49.9587	66.6566	100001	100000	100001
15.95	85.9495	0	0	1.27681	5.58137	28.0211	52.065	30	49.997	66.7077	100001	100000	100001
16	86.0116	0	0	1.24103	5.58553	28.0085	52.1038	30	50.0343	66.7574	100001	100000	100001
16.05	86.0721	0	0	1.20621	5.58958	27.9962	52.1416	30	50.0706	66.8057	100001	100000	100001
16.1	86.1309	0	0	1.17234	5.59352	27.9843	52.1784	30	50.1058	66.8528	100001	100000	100001
16.15	86.1881	0	0	1.13938	5.59735	27.9727	52.2141	30	50.1402	66.8986	100001	100000	100001
16.2	86.2438	0	0	1.10732	5.60108	27.9614	52.2489	30	50.1736	66.9431	100001	100000	100001
16.25	86.2979	0	0	1.07613	5.60471	27.9504	52.2827	30	50.2061	66.9864	100001	100000	100001
16.3	86.3506	0	0	1.0458	5.60824	27.9397	52.3157	30	50.2377	67.0285	100001	100000	100001
16.35	86.4018	0	0	1.01629	5.61167	27.9293	52.3477	30	50.2684	67.0695	100001	100000	100001
16.4	86.4517	0	0	0.987585	5.61501	27.9192	52.3788	30	50.2983	67.1094	100001	100000	100001
16.45	86.5001	0	0	0.959669	5.61826	27.9094	52.4091	30	50.3274	67.1482	100001	100000	100001
16.5	86.5473	0	0	0.93252	5.62142	27.8998	52.4386	30	50.3557	67.1859	100001	100000	100001
16.55	86.5931	0	0	0.906117	5.62449	27.8905	52.4672	30	50.3832	67.2225	100001	100000	100001
16.6	86.6377	0	0	0.880442	5.62747	27.8815	52.4951	30	50.4099	67.2582	100001	100000	100001
16.65	86.681	0	0	0.855475	5.63038	27.8727	52.5222	30	50.4359	67.2929	100001	100000	100001
16.7	86.7232	0	0	0.831198	5.6332	27.8642	52.5485	30	50.4612	67.3266	100001	100000	100001
16.75	86.7641	0	0	0.807593	5.63595	27.8559	52.5741	30	50.4858	67.3594	100001	100000	100001
16.8	86.804	0	0	0.784642	5.63862	27.8478	52.599	30	50.5097	67.3913	100001	100000	100001
16.85	86.8427	0	0	0.762329	5.64121	27.84	52.6233	30	50.5329	67.4223	100001	100000	100001
16.9	86.8804	0	0	0.740635	5.64374	27.8324	52.6468	30	50.5555	67.4524	100001	100000	100001
16.95	86.917	0	0	0.719546	5.64619	27.825	52.6697	30	50.5775	67.4817	100001	100000	100001
17	86.9526	0	0	0.699044	5.64857	27.8178	52.6919	30	50.5989	67.5101	100001	100000	100001
17.05	86.9872	0	0	0.679114	5.65089	27.8108	52.7135	30	50.6196	67.5378	100001	100000	100001
17.1	87.0208	0	0	0.659741	5.65315	27.804	52.7346	30	50.6398	67.5647	100001	100000	100001
17.15	87.0535	0	0	0.64091	5.65534	27.7974	52.755	30	50.6594	67.5909	100001	100000	100001
17.2	87.0853	0	0	0.622606	5.65747	27.7909	52.7749	30	50.6785	67.6163	100001	100000	100001
17.25	87.1162	0	0	0.604815	5.65953	27.7847	52.7942	30	50.697	67.641	100001	100000	100001
17.3	87.1462	0	0	0.587523	5.66155	27.7786	52.8129	30	50.715	67.665	100001	100000	100001
17.35	87.1754	0	0	0.570717	5.6635	27.7727	52.8312	30	50.7325	67.6884	100001	100000	100001
17.4	87.2037	0	0	0.554384	5.6654	27.767	52.8489	30	50.7496	67.7111	100001	100000	100001
17.45	87.2313	0	0	0.53851	5.66725	27.7614	52.8661	30	50.7661	67.7331	100001	100000	100001
17.5	87.2581	0	0	0.523084	5.66904	27.756	52.8828	30	50.7822	67.7545	100001	100000	100001
17.55	87.2841	0	0	0.508092	5.67079	27.7508	52.8991	30	50.7978	67.7754	100001	100000	100001
17.6	87.3094	0	0	0.493524	5.67248	27.7457	52.9149	30	50.8129	67.7956	100001	100000	100001
17.65	87.334	0	0	0.479367	5.67413	27.7407	52.9303	30	50.8277	67.8153	100001	100000	100001
17.7	87.3579	0	0	0.46561	5.67573	27.7359	52.9452	30	50.842	67.8344	100001	100000	100001
17.75	87.3811	0	0	0.452243	5.67728	27.7312	52.9597	30	50.8559	67.8529	100001	100000	100001
17.8	87.4036	0	0	0.439254	5.67879	27.7266	52.9738	30	50.8695	67.871	100001	100000	100001
17.85	87.4255	0	0	0.426634	5.68026	27.7222	52.9875	30	50.8826	67.8885	100001	100000	100001
17.9	87.4468	0	0	0.414372	5.68169	27.7179	53.0008	30	50.8954	67.9055	100001	100000	100001
17.95	87.4675	0	0	0.402458	5.68307	27.7138	53.0137	30	50.9078	67.9221	100001	100000	100001
18	87.4876	0	0	0.390883	5.68442	27.7097	53.0263	30	50.9199	67.9381	100001	100000	100001
18.05	87.5071	0	0	0.379637	5.68573	27.7058	53.0385	30	50.9316	67.9538	100001	100000	100001
18.1	87.5261	0	0	0.368711	5.687	27.7019	53.0504	30	50.943	67.9689	100001	100000	100001
18.15	87.5445	0	0	0.358096	5.68823	27.6982	53.0619	30	50.954	67.9837	100001	100000	100001
18.2	87.5624	0	0	0.347783	5.68943	27.6946	53.0731	30	50.9648	67.998	100001	100000	100001
18.25	87.5798	0	0	0.337764	5.6906	27.6911	53.0839	30	50.9752	68.0119	100001	100000	100001
18.3	87.5967	0	0	0.328031	5.69173	27.6877	53.0945	30	50.9853	68.0254	100001	100000	100001
18.35	87.6131	0	0	0.318576	5.69283	27.6844	53.1048	30	50.9952	68.0386	100001	100000	100001
18.4	87.6291	0	0	0.309391	5.6939	27.6812	53.1147	30	51.0048	68.0513	100001	100000	100001
18.45	87.6446	0	0	0.300468	5.69494	27.678	53.1244	30	51.014	68.0637	100001	100000	100001
18.5	87.6596	0	0	0.2918	5.69594	27.675	53.1338	30	51.0231	68.0758	100001	100000	100001
18.55	87.6742	0	0	0.28338	5.69692	27.6721	53.1429	30	51.0318	68.0875	100001	100000	100001
18.6	87.6884	0	0	0.2752	5.69788	27.6692	53.1518	30	51.0404	68.0988	100001	100000	100001
18.65	87.7022	0	0	0.267255	5.6988	27.6664	53.1604	30	51.0486	68.1099	100001	100000	100001
18.7	87.7156	0	0	0.259538	5.6997	27.6637	53.1688	30	51.0567	68.1206	100001	100000	100001
18.75	87.7286	0	0	0.252042	5.70057	27.6611	53.1769	30	51.0645	68.131	100001	100000	100001
18.8	87.7413	0	0	0.24476	5.70142	27.6585	53.1848	30	51.0721	68.1411	100001	100000	100001
18.85	87.7536	0	0	0.237688	5.70224	27.6561	53.1925	30	51.0794	68.1509	100001	100000	100001
18.9	87.7655	0	0	0.230818	5.70304	27.6537	53.2	30	51.0866	68.1605	100001	100000	100001
18.95	87.7771	0	0	0.224146	5.70381	27.6513	53.2072	30	51.0935	68.1697	100001	100000	100001
19	87.7883	0	0	0.217665	5.70457	27.6491	53.2142	30	51.1003	68.1787	100001	100000	100001
19.05	87.7992	0	0	0.21137	5.7053	27.6469	53.2211	30	51.1069	68.1875	100001	100000	100001
19.1	87.8099	0	0	0.205257	5.70601	27.6447	53.2277	30	51.1132	68.196	100001	100000	100001
19.15	87.8202	0	0	0.199319	5.7067	27.6427	53.2342	30	51.1194	68.2042	100001	100000	100001
19.2	87.8302	0	0	0.193552	5.70737	27.6406	53.2404	30	51.1254	68.2122	100001	100000	100001
19.25	87.8399	0	0	0.18795	5.70802	27.6387	53.2465	30	51.1313	68.22	100001	100000	100001
19.3	87.8494	0	0	0.18251	5.70866	27.6368	53.2524	30	51.1369	68.2276	100001	100000	100001
19.35	87.8585	0	0	0.177227	5.70927	27.6349	53.2581	30	51.1424	68.2349	100001	100000	100001
19.4	87.8674	0	0	0.172096	5.70987	27.6331	53.2637	30	51.1478	68.242	100001	100000	100001
19.45	87.8761	0	0	0.167112	5.71045	27.6314	53.2691	30	51.153	68.2489	100001	100000	100001
19.5	87.8845	0	0	0.162272	5.71101	27.6297	53.2744	30	51.158	68.2557	100001	100000	100001
19.55	87.8926	0	0	0.157572	5.71156	27.6281	53.2795	30	51.1629	68.2622	100001	100000	100001
19.6	87.9006	0	0	0.153007	5.71209	27.6265	53.2844	30	51.1677	68.2685	100001	100000	100001
19.65	87.9083	0	0	0.148574	5.7126	27.6249	53.2892	30	51.1723	68.2747	100001	100000	100001
19.7	87.9157	0	0	0.144269	5.7131	27.6234	53.2939	30	51.1768	68.2807	100001	100000	100001
19.75	87.923	0	0	0.140087	5.71359	27.6219	53.2984	30	51.1811	68.2865	100001	100000	100001
19.8	87.9301	0	0	0.136027	5.71406	27.6205	53.3028	30	51.1853	68.2921	100001	100000	100001
19.85	87.9369	0	0	0.132084	5.71452	27.6191	53.3071	30	51.1894	68.2976	100001	100000	100001
19.9	87.9435	0	0	0.128255	5.71497	27.6178	53.3113	30	51.1934	68.3029	100001	100000	100001
19.95	87.95	0	0	0.124536	5.7154	27.6165	53.3153	30	51.1973	68.3081	100001	100000	100001
20	87.9563	0	0	0.120925	5.71582	27.6152	53.3192	30	51.2011	68.3131	100001	100000	100001
20.05	87.9624	0	0	0.117418	5.71623	27.614	53.323	30	51.2047	68.318	100001	100000	100001
20.1	87.9683	0	0	0.114012	5.71662	27.6128	53.3267	30	51.2083	68.3227	100001	100000	100001
20.15	87.974	0	0	0.110705	5.71701	27.6117	53.3303	30	51.2117	68.3273	100001	100000	100001
20.2	87.9796	0	0	0.107494	5.71738	27.6106	53.3338	30	51.2151	68.3317	100001	100000	100001
20.25	87.985	0	0	0.104375	5.71775	27.6095	53.3372	30	51.2183	68.3361	100001	100000	100001
20.3	87.9903	0	0	0.101347	5.7181	27.6084	53.3405	30	51.2215	68.3403	100001	100000	100001
20.35	87.9954	0	0	0.0984057	5.71844	27.6074	53.3437	30	51.2245	68.3444	100001	100000	100001
20.4	88.0003	0	0	0.09555	5.71877	27.6064	53.3468	30	51.2275	68.3483	100001	100000	100001
20.45	88.0051	0	0	0.0927769	5.71909	27.6054	53.3498	30	51.2304	68.3522	100001	100000	100001
20.5	88.0098	0	0	0.0900841	5.71941	27.6045	53.3527	30	51.2332	68.3559	100001	100000	100001
20.55	88.0144	0	0	0.0874692	5.71971	27.6036	53.3555	30	51.2359	68.3596	100001	100000	100001
20.6	88.0188	0	0	0.08493	5.72001	27.6027	53.3583	30	51.2386	68.3631	100001	100000	100001
20.65	88.023	0	0	0.0824643	5.72029	27.6018	53.361	30	51.2411	68.3665	100001	100000	100001
20.7	88.0272	0	0	0.08007	5.72057	27.601	53.3635	30	51.2436	68.3698	100001	100000	100001
20.75	88.0312	0	0	0.0777451	5.72084	27.6002	53.3661	30	51.246	68.3731	100001	100000	100001
20.8	88.0352	0	0	0.0754876	5.72111	27.5994	53.3685	30	51.2484	68.3762	100001	100000	100001
20.85	88.039	0	0	0.0732954	5.72136	27.5986	53.3709	30	51.2507	68.3792	100001	100000	100001
20.9	88.0427	0	0	0.0711667	5.72161	27.5979	53.3732	30	51.2529	68.3822	100001	100000	100001
20.95	88.0462	0	0	0.0690998	5.72185	27.5971	53.3755	30	51.2551	68.3851	100001	100000	100001
21	88.0497	0	0	0.0670928	5.72208	27.5964	53.3776	30	51.2571	68.3879	100001	100000	100001
21.05	88.0531	0	0	0.0651439	5.72231	27.5958	53.3797	30	51.2592	68.3906	100001	100000	100001
21.1	88.0564	0	0	0.0632516	5.72253	27.5951	53.3818	30	51.2611	68.3932	100001	100000	100001
21.15	88.0596	0	0	0.0614141	5.72274	27.5945	53.3838	30	51.2631	68.3957	100001	100000	100001
21.2	88.0627	0	0	0.0596299	5.72295	27.5938	53.3857	30	51.2649	68.3982	100001	100000	100001
21.25	88.0657	0	0	0.0578974	5.72315	27.5932	53.3876	30	51.2667	68.4006	100001	100000	100001
21.3	88.0686	0	0	0.0562152	5.72335	27.5926	53.3894	30	51.2685	68.403	100001	100000	100001
21.35	88.0714	0	0	0.0545818	5.72354	27.5921	53.3912	30	51.2702	68.4052	100001	100000	100001
21.4	88.0742	0	0	0.0529958	5.72372	27.5915	53.3929	30	51.2718	68.4074	100001	100000	100001
21.45	88.0769	0	0	0.0514558	5.7239	27.591	53.3946	30	51.2734	68.4096	100001	100000	100001
21.5	88.0795	0	0	0.0499605	5.72407	27.5905	53.3962	30	51.275	68.4117	100001	100000	100001
21.55	88.082	0	0	0.0485086	5.72424	27.5899	53.3978	30	51.2765	68.4137	100001	100000	100001
21.6	88.0844	0	0	0.0470988	5.72441	27.5895	53.3993	30	51.278	68.4156	100001	100000	100001
21.65	88.0868	0	0	0.0457299	5.72457	27.589	53.4008	30	51.2794	68.4175	100001	100000	100001
21.7	88.0891	0	0	0.0444008	5.72472	27.5885	53.4023	30	51.2808	68.4194	100001	100000	100001
21.75	88.0914	0	0	0.0431102	5.72487	27.5881	53.4037	30	51.2821	68.4212	100001	100000	100001
21.8	88.0935	0	0	0.0418571	5.72502	27.5876	53.405	30	51.2834	68.4229	100001	100000	100001
21.85	88.0957	0	0	0.0406404	5.72516	27.5872	53.4063	30	51.2847	68.4246	100001	100000	100001
21.9	88.0977	0	0	0.039459	5.7253	27.5868	53.4076	30	51.2859	68.4262	100001	100000	100001
21.95	88.0997	0	0	0.0383119	5.72543	27.5864	53.4089	30	51.2871	68.4278	100001	100000	100001
22	88.1016	0	0	0.0371981	5.72556	27.586	53.4101	30	51.2883	68.4294	100001	100000	100001
22.05	88.1035	0	0	0.0361167	5.72569	27.5856	53.4112	30	51.2894	68.4309	100001	100000	100001
22.1	88.1053	0	0	0.0350666	5.72581	27.5853	53.4124	30	51.2905	68.4323	100001	100000	100001
22.15	88.1071	0	0	0.0340471	5.72593	27.5849	53.4135	30	51.2916	68.4338	100001	100000	100001
22.2	88.1088	0	0	0.0330571	5.72604	27.5846	53.4146	30	51.2926	68.4351	100001	100000	100001
22.25	88.1105	0	0	0.032096	5.72615	27.5842	53.4156	30	51.2936	68.4365	100001	100000	100001
22.3	88.1121	0	0	0.0311627	5.72626	27.5839	53.4166	30	51.2946	68.4378	100001	100000	100001
22.35	88.1137	0	0	0.0302566	5.72637	27.5836	53.4176	30	51.2955	68.439	100001	100000	100001
22.4	88.1152	0	0	0.0293768	5.72647	27.5833	53.4186	30	51.2964	68.4402	100001	100000	100001
22.45	88.1167	0	0	0.0285225	5.72657	27.583	53.4195	30	51.2973	68.4414	100001	100000	100001
22.5	88.1181	0	0	0.0276931	5.72666	27.5827	53.4204	30	51.2982	68.4426	100001	100000	100001
22.55	88.1195	0	0	0.0268877	5.72676	27.5824	53.4213	30	51.299	68.4437	100001	100000	100001
22.6	88.1209	0	0	0.0261058	5.72685	27.5821	53.4221	30	51.2998	68.4448	100001	100000	100001
22.65	88.1222	0	0	0.0253466	5.72694	27.5819	53.4229	30	51.3006	68.4458	100001	100000	100001
22.7	88.1235	0	0	0.0246095	5.72702	27.5816	53.4237	30	51.3014	68.4469	100001	100000	100001
22.75	88.1247	0	0	0.0238937	5.72711	27.5814	53.4245	30	51.3021	68.4479	100001	100000	100001
22.8	88.1259	0	0	0.0231988	5.72719	27.5811	53.4253	30	51.3029	68.4488	100001	100000	100001
22.85	88.1271	0	0	0.0225241	5.72727	27.5809	53.426	30	51.3036	68.4498	100001	100000	100001
22.9	88.1282	0	0	0.021869	5.72734	27.5806	53.4267	30	51.3043	68.4507	100001	100000	100001
22.95	88.1293	0	0	0.0212329	5.72742	27.5804	53.4274	30	51.3049	68.4516	100001	100000	100001
23	88.1304	0	0	0.0206153	5.72749	27.5802	53.4281	30	51.3056	68.4524	100001	100000	100001
23.05	88.1315	0	0	0.0200157	5.72756	27.58	53.4287	30	51.3062	68.4532	100001	100000	100001
23.1	88.1325	0	0	0.0194335	5.72763	27.5798	53.4293	30	51.3068	68.454	100001	100000	100001
23.15	88.1335	0	0	0.0188682	5.72769	27.5796	53.43	30	51.3074	68.4548	100001	100000	100001
23.2	88.1344	0	0	0.0183194	5.72776	27.5794	53.4306	30	51.308	68.4556	100001	100000	100001
23.25	88.1353	0	0	0.0177865	5.72782	27.5792	53.4311	30	51.3085	68.4563	100001	100000	100001
23.3	88.1362	0	0	0.0172691	5.72788	27.579	53.4317	30	51.309	68.4571	100001	100000	100001
23.35	88.1371	0	0	0.0167667	5.72794	27.5789	53.4322	30	51.3096	68.4578	100001	100000	100001
23.4	88.1379	0	0	0.016279	5.72799	27.5787	53.4328	30	51.3101	68.4584	100001	100000	100001
23.45	88.1388	0	0	0.0158054	5.72805	27.5785	53.4333	30	51.3106	68.4591	100001	100000	100001
23.5	88.1396	0	0	0.0153456	5.7281	27.5784	53.4338	30	51.311	68.4597	100001	100000	100001
23.55	88.1403	0	0	0.0148992	5.72815	27.5782	53.4343	30	51.3115	68.4603	100001	100000	100001
23.6	88.1411	0	0	0.0144658	5.7282	27.5781	53.4347	30	51.312	68.4609	100001	100000	100001
23.65	88.1418	0	0	0.0140449	5.72825	27.5779	53.4352	30	51.3124	68.4615	100001	100000	100001
23.7	88.1425	0	0	0.0136363	5.7283	27.5778	53.4356	30	51.3128	68.4621	100001	100000	100001
23.75	88.1432	0	0	0.0132396	5.72835	27.5776	53.4361	30	51.3132	68.4627	100001	100000	100001
23.8	88.1439	0	0	0.0128544	5.72839	27.5775	53.4365	30	51.3136	68.4632	100001	100000	100001
23.85	88.1445	0	0	0.0124805	5.72843	27.5774	53.4369	30	51.314	68.4637	100001	100000	100001
23.9	88.1452	0	0	0.0121174	5.72848	27.5772	53.4373	30	51.3144	68.4642	100001	100000	100001
23.95	88.1458	0	0	0.0117648	5.72852	27.5771	53.4377	30	51.3148	68.4647	100001	100000	100001
24	88.1464	0	0	0.0114225	5.72856	27.577	53.438	30	51.3151	68.4652	100001	100000	100001
24.05	88.147	0	0	0.0110902	5.7286	27.5769	53.4384	30	51.3155	68.4656	100001	100000	100001
24.1	88.1475	0	0	0.0107675	5.72863	27.5768	53.4387	30	51.3158	68.4661	100001	100000	100001
24.15	88.1481	0	0	0.0104542	5.72867	27.5767	53.4391	30	51.3161	68.4665	100001	100000	100001
24.2	88.1486	0	0	0.0101501	5.72871	27.5766	53.4394	30	51.3165	68.4669	100001	100000	100001
24.25	88.1491	0	0	0.00985475	5.72874	27.5764	53.4397	30	51.3168	68.4674	100001	100000	100001
24.3	88.1496	0	0	0.00956802	5.72877	27.5763	53.44	30	51.3171	68.4678	100001	100000	100001
24.35	88.1501	0	0	0.00928963	5.72881	27.5763	53.4404	30	51.3174	68.4681	100001	100000	100001
24.4	88.1506	0	0	0.00901933	5.72884	27.5762	53.4406	30	51.3176	68.4685	100001	100000	100001
24.45	88.151	0	0	0.0087569	5.72887	27.5761	53.4409	30	51.3179	68.4689	100001	100000	100001
24.5	88.1514	0	0	0.0085021	5.7289	27.576	53.4412	30	51.3182	68.4692	100001	100000	100001
24.55	88.1519	0	0	0.00825472	5.72893	27.5759	53.4415	30	51.3184	68.4696	100001	100000	100001
24.6	88.1523	0	0	0.00801453	5.72895	27.5758	53.4417	30	51.3187	68.4699	100001	100000	100001
24.65	88.1527	0	0	0.00778132	5.72898	27.5757	53.442	30	51.3189	68.4702	100001	100000	100001
24.7	88.1531	0	0	0.0075549	5.72901	27.5756	53.4422	30	51.3192	68.4705	100001	100000	100001
24.75	88.1535	0	0	0.00733507	5.72903	27.5756	53.4425	30	51.3194	68.4709	100001	100000	100001
24.8	88.1538	0	0	0.00712164	5.72906	27.5755	53.4427	30	51.3196	68.4711	100001	100000	100001
24.85	88.1542	0	0	0.00691441	5.72908	27.5754	53.4429	30	51.3198	68.4714	100001	100000	100001
24.9	88.1546	0	0	0.00671321	5.72911	27.5754	53.4431	30	51.32	68.4717	100001	100000	100001
24.95	88.1549	0	0	0.00651787	5.72913	27.5753	53.4434	30	51.3202	68.472	100001	100000	100001
25	88.1552	0	0	0.0063282	5.72915	27.5752	53.4436	30	51.3204	68.4723	100001	100000	100001
25.05	88.1555	0	0	0.00614406	5.72917	27.5752	53.4438	30	51.3206	68.4725	100001	100000	100001
25.1	88.1559	0	0	0.00596527	5.72919	27.5751	53.444	30	51.3208	68.4728	100001	100000	100001
25.15	88.1562	0	0	0.00579169	5.72921	27.575	53.4441	30	51.321	68.473	100001	100000	100001
25.2	88.1564	0	0	0.00562315	5.72923	27.575	53.4443	30	51.3212	68.4732	100001	100000	100001
25.25	88.1567	0	0	0.00545952	5.72925	27.5749	53.4445	30	51.3213	68.4735	100001	100000	100001
25.3	88.157	0	0	0.00530065	5.72927	27.5749	53.4447	30	51.3215	68.4737	100001	100000	100001
25.35	88.1573	0	0	0.00514641	5.72929	27.5748	53.4448	30	51.3217	68.4739	100001	100000	100001
25.4	88.1575	0	0	0.00499665	5.7293	27.5748	53.445	30	51.3218	68.4741	100001	100000	100001
25.45	88.1578	0	0	0.00485124	5.72932	27.5747	53.4452	30	51.322	68.4743	100001	100000	100001
25.5	88.158	0	0	0.00471007	5.72934	27.5747	53.4453	30	51.3221	68.4745	100001	100000	100001
25.55	88.1583	0	0	0.00457301	5.72935	27.5746	53.4455	30	51.3223	68.4747	100001	100000	100001
25.6	88.1585	0	0	0.00443993	5.72937	27.5746	53.4456	30	51.3224	68.4749	100001	100000	100001
25.65	88.1587	0	0	0.00431073	5.72938	27.5745	53.4458	30	51.3225	68.4751	100001	100000	100001
25.7	88.1589	0	0	0.00418528	5.7294	27.5745	53.4459	30	51.3227	68.4752	100001	100000	100001
25.75	88.1592	0	0	0.00406349	5.72941	27.5744	53.446	30	51.3228	68.4754	100001	100000	100001
25.8	88.1594	0	0	0.00394523	5.72943	27.5744	53.4462	30	51.3229	68.4756	100001	100000	100001
25.85	88.1596	0	0	0.00383042	5.72944	27.5743	53.4463	30	51.323	68.4757	100001	100000	100001
25.9	88.1598	0	0	0.00371896	5.72945	27.5743	53.4464	30	51.3232	68.4759	100001	100000	100001
25.95	88.1599	0	0	0.00361073	5.72947	27.5743	53.4465	30	51.3233	68.476	100001	100000	100001
26	88.1601	0	0	0.00350565	5.72948	27.5742	53.4466	30	51.3234	68.4762	100001	100000	100001
26.05	88.1603	0	0	0.00340363	5.72949	27.5742	53.4467	30	51.3235	68.4763	100001	100000	100001
26.1	88.1605	0	0	0.00330458	5.7295	27.5742	53.4468	30	51.3236	68.4765	100001	100000	100001
26.15	88.1606	0	0	0.00320841	5.72951	27.5741	53.4469	30	51.3237	68.4766	100001	100000	100001
26.2	88.1608	0	0	0.00311505	5.72952	27.5741	53.4471	30	51.3238	68.4767	100001	100000	100001
26.25	88.161	0	0	0.00302439	5.72953	27.5741	53.4471	30	51.3239	68.4768	100001	100000	100001
26.3	88.1611	0	0	0.00293638	5.72954	27.574	53.4472	30	51.324	68.477	100001	100000	100001
26.35	88.1613	0	0	0.00285092	5.72955	27.574	53.4473	30	51.3241	68.4771	100001	100000	100001
26.4	88.1614	0	0	0.00276796	5.72956	27.574	53.4474	30	51.3242	68.4772	100001	100000	100001
26.45	88.1615	0	0	0.0026874	5.72957	27.5739	53.4475	30	51.3242	68.4773	100001	100000	100001
26.5	88.1617	0	0	0.00260919	5.72958	27.5739	53.4476	30	51.3243	68.4774	100001	100000	100001
26.55	88.1618	0	0	0.00253326	5.72959	27.5739	53.4477	30	51.3244	68.4775	100001	100000	100001
26.6	88.1619	0	0	0.00245954	5.7296	27.5739	53.4478	30	51.3245	68.4776	100001	100000	100001
26.65	88.1621	0	0	0.00238796	5.72961	27.5738	53.4478	30	51.3245	68.4777	100001	100000	100001
26.7	88.1622	0	0	0.00231846	5.72962	27.5738	53.4479	30	51.3246	68.4778	100001	100000	100001
26.75	88.1623	0	0	0.00225099	5.72962	27.5738	53.448	30	51.3247	68.4779	100001	100000	100001
26.8	88.1624	0	0	0.00218548	5.72963	27.5738	53.4481	30	51.3248	68.478	100001	100000	100001
26.85	88.1625	0	0	0.00212188	5.72964	27.5737	53.4481	30	51.3248	68.4781	100001	100000	100001
26.9	88.1626	0	0	0.00206013	5.72965	27.5737	53.4482	30	51.3249	68.4782	100001	100000	100001
26.95	88.1627	0	0	0.00200017	5.72965	27.5737	53.4483	30	51.325	68.4783	100001	100000	100001
27	88.1628	0	0	0.00194196	5.72966	27.5737	53.4483	30	51.325	68.4783	100001	100000	100001
27.05	88.1629	0	0	0.00188545	5.72967	27.5737	53.4484	30	51.3251	68.4784	100001	100000	100001
27.1	88.163	0	0	0.00183057	5.72967	27.5736	53.4484	30	51.3251	68.4785	100001	100000	100001
27.15	88.1631	0	0	0.0017773	5.72968	27.5736	53.4485	30	51.3252	68.4786	100001	100000	100001
27.2	88.1632	0	0	0.00172557	5.72969	27.5736	53.4486	30	51.3252	68.4786	100001	100000	100001
27.25	88.1633	0	0	0.00167536	5.72969	27.5736	53.4486	30	51.3253	68.4787	100001	100000	100001
27.3	88.1634	0	0	0.0016266	5.7297	27.5736	53.4487	30	51.3253	68.4788	100001	100000	100001
27.35	88.1635	0	0	0.00157926	5.7297	27.5736	53.4487	30	51.3254	68.4788	100001	100000	100001
27.4	88.1635	0	0	0.0015333	5.72971	27.5735	53.4488	30	51.3254	68.4789	100001	100000	100001
27.45	88.1636	0	0	0.00148867	5.72971	27.5735	53.4488	30	51.3255	68.479	100001	100000	100001
27.5	88.1637	0	0	0.00144535	5.72972	27.5735	53.4489	30	51.3255	68.479	100001	100000	100001
27.55	88.1638	0	0	0.00140329	5.72972	27.5735	53.4489	30	51.3256	68.4791	100001	100000	100001
27.6	88.1638	0	0	0.00136245	5.72973	27.5735	53.449	30	51.3256	68.4791	100001	100000	100001
27.65	88.1639	0	0	0.00132279	5.72973	27.5735	53.449	30	51.3257	68.4792	100001	100000	100001
27.7	88.164	0	0	0.0012843	5.72974	27.5735	53.449	30	51.3257	68.4793	100001	100000	100001
27.75	88.164	0	0	0.00124692	5.72974	27.5734	53.4491	30	51.3257	68.4793	100001	100000	100001
27.8	88.1641	0	0	0.00121063	5.72975	27.5734	53.4491	30	51.3258	68.4794	100001	100000	100001
27.85	88.1642	0	0	0.0011754	5.72975	27.5734	53.4492	30	51.3258	68.4794	100001	100000	100001
27.9	88.1642	0	0	0.00114119	5.72975	27.5734	53.4492	30	51.3258	68.4795	100001	100000	100001
27.95	88.1643	0	0	0.00110798	5.72976	27.5734	53.4492	30	51.3259	68.4795	100001	100000	100001
28	88.1643	0	0	0.00107573	5.72976	27.5734	53.4493	30	51.3259	68.4795	100001	100000	100001
28.05	88.1644	0	0	0.00104442	5.72976	27.5734	53.4493	30	51.3259	68.4796	100001	100000	100001
28.1	88.1644	0	0	0.00101403	5.72977	27.5734	53.4493	30	51.326	68.4796	100001	100000	100001
28.15	88.1645	0	0	0.000984515	5.72977	27.5734	53.4494	30	51.326	68.4797	100001	100000	100001
28.2	88.1645	0	0	0.000955862	5.72978	27.5733	53.4494	30	51.326	68.4797	100001	100000	100001
28.25	88.1646	0	0	0.000928043	5.72978	27.5733	53.4494	30	51.3261	68.4798	100001	100000	100001
28.3	88.1646	0	0	0.000901034	5.72978	27.5733	53.4495	30	51.3261	68.4798	100001	100000	100001
28.35	88.1647	0	0	0.000874811	5.72978	27.5733	53.4495	30	51.3261	68.4798	100001	100000	100001
28.4	88.1647	0	0	0.000849351	5.72979	27.5733	53.4495	30	51.3261	68.4799	100001	100000	100001
28.45	88.1648	0	0	0.000824631	5.72979	27.5733	53.4495	30	51.3262	68.4799	100001	100000	100001
28.5	88.1648	0	0	0.000800631	5.72979	27.5733	53.4496	30	51.3262	68.4799	100001	100000	100001
28.55	88.1649	0	0	0.00077733	5.7298	27.5733	53.4496	30	51.3262	68.48	100001	100000	100001
28.6	88.1649	0	0	0.000754707	5.7298	27.5733	53.4496	30	51.3262	68.48	100001	100000	100001
28.65	88.1649	0	0	0.000732743	5.7298	27.5733	53.4496	30	51.3263	68.48	100001	100000	100001
28.7	88.165	0	0	0.000711417	5.7298	27.5733	53.4497	30	51.3263	68.4801	100001	100000	100001
28.75	88.165	0	0	0.000690712	5.72981	27.5732	53.4497	30	51.3263	68.4801	100001	100000	100001
28.8	88.165	0	0	0.00067061	5.72981	27.5732	53.4497	30	51.3263	68.4801	100001	100000	100001
28.85	88.1651	0	0	0.000651092	5.72981	27.5732	53.4497	30	51.3264	68.4801	100001	100000	100001
28.9	88.1651	0	0	0.000632143	5.72981	27.5732	53.4497	30	51.3264	68.4802	100001	100000	100001
28.95	88.1651	0	0	0.000613746	5.72981	27.5732	53.4498	30	51.3264	68.4802	100001	100000	100001
29	88.1652	0	0	0.000595883	5.72982	27.5732	53.4498	30	51.3264	68.4802	100001	100000	100001
29.05	88.1652	0	0	0.00057854	5.72982	27.5732	53.4498	30	51.3264	68.4802	100001	100000	100001
29.1	88.1652	0	0	0.000561703	5.72982	27.5732	53.4498	30	51.3264	68.4803	100001	100000	100001
29.15	88.1653	0	0	0.000545355	5.72982	27.5732	53.4498	30	51.3265	68.4803	100001	100000	100001
29.2	88.1653	0	0	0.000529483	5.72982	27.5732	53.4499	30	51.3265	68.4803	100001	100000	100001
29.25	88.1653	0	0	0.000514073	5.72983	27.5732	53.4499	30	51.3265	68.4803	100001	100000	100001
29.3	88.1653	0	0	0.000499112	5.72983	27.5732	53.4499	30	51.3265	68.4803	100001	100000	100001
29.35	88.1654	0	0	0.000484585	5.72983	27.5732	53.4499	30	51.3265	68.4804	100001	100000	100001
29.4	88.1654	0	0	0.000470482	5.72983	27.5732	53.4499	30	51.3265	68.4804	100001	100000	100001
29.45	88.1654	0	0	0.000456789	5.72983	27.5732	53.4499	30	51.3266	68.4804	100001	100000	100001
29.5	88.1654	0	0	0.000443495	5.72983	27.5732	53.4499	30	51.3266	68.4804	100001	100000	100001
29.55	88.1655	0	0	0.000430588	5.72984	27.5732	53.45	30	51.3266	68.4804	100001	100000	100001
29.6	88.1655	0	0	0.000418056	5.72984	27.5732	53.45	30	51.3266	68.4805	100001	100000	100001
29.65	88.1655	0	0	0.000405889	5.72984	27.5732	53.45	30	51.3266	68.4805	100001	100000	100001
29.7	88.1655	0	0	0.000394076	5.72984	27.5731	53.45	30	51.3266	68.4805	100001	100000	100001
29.75	88.1655	0	0	0.000382607	5.72984	27.5731	53.45	30	51.3266	68.4805	100001	100000	100001
29.8	88.1656	0	0	0.000371471	5.72984	27.5731	53.45	30	51.3266	68.4805	100001	100000	100001
29.85	88.1656	0	0	0.00036066	5.72984	27.5731	53.45	30	51.3267	68.4805	100001	100000	100001
29.9	88.1656	0	0	0.000350163	5.72985	27.5731	53.4501	30	51.3267	68.4806	100001	100000	100001
29.95	88.1656	0	0	0.000339972	5.72985	27.5731	53.4501	30	51.3267	68.4806	100001	100000	100001
30	88.1656	0	0	0.000330077	5.72985	27.5731	53.4501	30	51.3267	68.4806	100001	100000	100001
30.05	88.1657	0	0	0.000320471	5.72985	27.5731	53.4501	30	51.3267	68.4806	100001	100000	100001
30.1	88.1657	0	0	0.000311144	5.72985	27.5731	53.4501	30	51.3267	68.4806	100001	100000	100001
30.15	88.1657	0	0	0.000302088	5.72985	27.5731	53.4501	30	51.3267	68.4806	100001	100000	100001
30.2	88.1657	0	0	0.000293296	5.72985	27.5731	53.4501	30	51.3267	68.4806	100001	100000	100001
30.25	88.1657	0	0	0.00028476	5.72985	27.5731	53.4501	30	51.3267	68.4806	100001	100000	100001
30.3	88.1657	0	0	0.000276473	5.72985	27.5731	53.4501	30	51.3267	68.4807	100001	100000	100001
30.35	88.1657	0	0	0.000268426	5.72985	27.5731	53.4501	30	51.3268	68.4807	100001	100000	100001
30.4	88.1658	0	0	0.000260614	5.72986	27.5731	53.4501	30	51.3268	68.4807	100001	100000	100001
30.45	88.1658	0	0	0.000253029	5.72986	27.5731	53.4502	30	51.3268	68.4807	100001	100000	100001
30.5	88.1658	0	0	0.000245665	5.72986	27.5731	53.4502	30	51.3268	68.4807	100001	100000	100001
30.55	88.1658	0	0	0.000238515	5.72986	27.5731	53.4502	30	51.3268	68.4807	100001	100000	100001
30.6	88.1658	0	0	0.000231573	5.72986	27.5731	53.4502	30	51.3268	68.4807	100001	100000	100001
30.65	88.1658	0	0	0.000224833	5.72986	27.5731	53.4502	30	51.3268	68.4807	100001	100000	100001
30.7	88.1658	0	0	0.00021829	5.72986	27.5731	53.4502	30	51.3268	68.4807	100001	100000	100001
30.75	88.1658	0	0	0.000211937	5.72986	27.5731	53.4502	30	51.3268	68.4807	100001	100000	100001
30.8	88.1659	0	0	0.000205768	5.72986	27.5731	53.4502	30	51.3268	68.4808	100001	100000	100001
30.85	88.1659	0	0	0.00019978	5.72986	27.5731	53.4502	30	51.3268	68.4808	100001	100000	100001
30.9	88.1659	0	0	0.000193965	5.72986	27.5731	53.4502	30	51.3268	68.4808	100001	100000	100001
30.95	88.1659	0	0	0.00018832	5.72986	27.5731	53.4502	30	51.3268	68.4808	100001	100000	100001
31	88.1659	0	0	0.000182839	5.72986	27.5731	53.4502	30	51.3268	68.4808	100001	100000	100001
31.05	88.1659	0	0	0.000177518	5.72987	27.5731	53.4502	30	51.3268	68.4808	100001	100000	100001
31.1	88.1659	0	0	0.000172351	5.72987	27.5731	53.4502	30	51.3269	68.4808	100001	100000	100001
31.15	88.1659	0	0	0.000167335	5.72987	27.5731	53.4502	30	51.3269	68.4808	100001	100000	100001
31.2	88.1659	0	0	0.000162465	5.72987	27.5731	53.4503	30	51.3269	68.4808	100001	100000	100001
31.25	88.1659	0	0	0.000157736	5.72987	27.5731	53.4503	30	51.3269	68.4808	100001	100000	100001
31.3	88.1659	0	0	0.000153146	5.72987	27.5731	53.4503	30	51.3269	68.4808	100001	100000	100001
31.35	88.166	0	0	0.000148689	5.72987	27.5731	53.4503	30	51.3269	68.4808	100001	100000	100001
31.4	88.166	0	0	0.000144361	5.72987	27.5731	53.4503	30	51.3269	68.4808	100001	100000	100001
31.45	88.166	0	0	0.00014016	5.72987	27.5731	53.4503	30	51.3269	68.4808	100001	100000	100001
31.5	88.166	0	0	0.00013608	5.72987	27.5731	53.4503	30	51.3269	68.4809	100001	100000	100001
31.55	88.166	0	0	0.00013212	5.72987	27.5731	53.4503	30	51.3269	68.4809	100001	100000	100001
31.6	88.166	0	0	0.000128275	5.72987	27.5731	53.4503	30	51.3269	68.4809	100001	100000	100001
31.65	88.166	0	0	0.000124541	5.72987	27.5731	53.4503	30	51.3269	68.4809	100001	100000	100001
31.7	88.166	0	0	0.000120917	5.72987	27.5731	53.4503	30	51.3269	68.4809	100001	100000	100001
31.75	88.166	0	0	0.000117397	5.72987	27.573	53.4503	30	51.3269	68.4809	100001	100000	100001
31.8	88.166	0	0	0.000113981	5.72987	27.573	53.4503	30	51.3269	68.4809	100001	100000	100001
31.85	88.166	0	0	0.000110663	5.72987	27.573	53.4503	30	51.3269	68.4809	100001	100000	100001
31.9	88.166	0	0	0.000107443	5.72987	27.573	53.4503	30	51.3269	68.4809	100001	100000	100001
31.95	88.166	0	0	0.000104316	5.72987	27.573	53.4503	30	51.3269	68.4809	100001	100000	100001
32	88.166	0	0	0.000101279	5.72987	27.573	53.4503	30	51.3269	68.4809	100001	100000	100001
32.05	88.166	0	0	9.83318e-05	5.72987	27.573	53.4503	30	51.3269	68.4809	100001	100000	100001
32.1	88.166	0	0	9.54699e-05	5.72988	27.573	53.4503	30	51.3269	68.4809	100001	100000	100001
32.15	88.166	0	0	9.26914e-05	5.72988	27.573	53.4503	30	51.3269	68.4809	100001	100000	100001
32.2	88.1661	0	0	8.99937e-05	5.72988	27.573	53.4503	30	51.3269	68.4809	100001	100000	100001
32.25	88.1661	0	0	8.73745e-05	5.72988	27.573	53.4503	30	51.3269	68.4809	100001	100000	100001
32.3	88.1661	0	0	8.48315e-05	5.72988	27.573	53.4503	30	51.3269	68.4809	100001	100000	100001
32.35	88.1661	0	0	8.23625e-05	5.72988	27.573	53.4503	30	51.3269	68.4809	100001	100000	100001
32.4	88.1661	0	0	7.99654e-05	5.72988	27.573	53.4503	30	51.327	68.4809	100001	100000	100001
32.45	88.1661	0	0	7.76381e-05	5.72988	27.573	53.4503	30	51.327	68.4809	100001	100000	100001
32.5	88.1661	0	0	7.53785e-05	5.72988	27.573	53.4503	30	51.327	68.4809	100001	100000	100001
32.55	88.1661	0	0	7.31847e-05	5.72988	27.573	53.4504	30	51.327	68.4809	100001	100000	100001
32.6	88.1661	0	0	7.10546e-05	5.72988	27.573	53.4504	30	51.327	68.4809	100001	100000	100001
32.65	88.1661	0	0	6.89867e-05	5.72988	27.573	53.4504	30	51.327	68.4809	100001	100000	100001
32.7	88.1661	0	0	6.69789e-05	5.72988	27.573	53.4504	30	51.327	68.4809	100001	100000	100001
32.75	88.1661	0	0	6.50295e-05	5.72988	27.573	53.4504	30	51.327	68.481	100001	100000	100001
32.8	88.1661	0	0	6.31369e-05	5.72988	27.573	53.4504	30	51.327	68.481	100001	100000	100001
32.85	88.1661	0	0	6.12993e-05	5.72988	27.573	53.4504	30	51.327	68.481	100001	100000	100001
32.9	88.1661	0	0	5.95152e-05	5.72988	27.573	53.4504	30	51.327	68.481	100001	100000	100001
32.95	88.1661	0	0	5.77831e-05	5.72988	27.573	53.4504	30	51.327	68.481	100001	100000	100001
33	88.1661	0	0	5.61014e-05	5.72988	27.573	53.4504	30	51.327	68.481	100001	100000	100001
33.05	88.1661	0	0	5.44686e-05	5.72988	27.573	53.4504	30	51.327	68.481	100001	100000	100001
33.1	88.1661	0	0	5.28833e-05	5.72988	27.573	53.4504	30	51.327	68.481	100001	100000	100001
33.15	88.1661	0	0	5.13442e-05	5.72988	27.573	53.4504	30	51.327	68.481	100001	100000	100001
33.2	88.1661	0	0	4.98498e-05	5.72988	27.573	53.4504	30	51.327	68.481	100001	100000	100001
33.25	88.1661	0	0	4.8399e-05	5.72988	27.573	53.4504	30	51.327	68.481	100001	100000	100001
33.3	88.1661	0	0	4.69904e-05	5.72988	27.573	53.4504	30	51.327	68.481	100001	100000	100001
33.35	88.1661	0	0	4.56228e-05	5.72988	27.573	53.4504	30	51.327	68.481	100001	100000	100001
33.4	88.1661	0	0	4.42949e-05	5.72988	27.573	53.4504	30	51.327	68.481	100001	100000	100001
33.45	88.1661	0	0	4.30057e-05	5.72988	27.573	53.4504	30	51.327	68.481	100001	100000	100001
33.5	88.1661	0	0	4.17541e-05	5.72988	27.573	53.4504	30	51.327	68.481	100001	100000	100001
33.55	88.1661	0	0	4.05389e-05	5.72988	27.573	53.4504	30	51.327	68.481	100001	100000	100001
33.6	88.1661	0	0	3.9359e-05	5.72988	27.573	53.4504	30	51.327	68.481	100001	100000	100001
33.65	88.1661	0	0	3.82135e-05	5.72988	27.573	53.4504	30	51.327	68.481	100001	100000	100001
33.7	88.1661	0	0	3.71013e-05	5.72988	27.573	53.4504	30	51.327	68.481	100001	100000	100001
33.75	88.1661	0	0	3.60215e-05	5.72988	27.573	53.4504	30	51.327	68.481	100001	100000	100001
33.8	88.1661	0	0	3.49731e-05	5.72988	27.573	53.4504	30	51.327	68.481	100001	100000	100001
33.85	88.1661	0	0	3.39553e-05	5.72988	27.573	53.4504	30	51.327	68.481	100001	100000	100001
33.9	88.1662	0	0	3.2967e-05	5.72988	27.573	53.4504	30	51.327	68.481	100001	100000	100001
33.95	88.1662	0	0	3.20075e-05	5.72988	27.573	53.4504	30	51.327	68.481	100001	100000	100001
34	88.1662	0	0	3.1076e-05	5.72988	27.573	53.4504	30	51.327	68.481	100001	100000	100001
34.05	88.1662	0	0	3.01715e-05	5.72988	27.573	53.4504	30	51.327	68.481	100001	100000	100001
34.1	88.1662	0	0	2.92934e-05	5.72988	27.573	53.4504	30	51.327	68.481	100001	100000	100001
34.15	88.1662	0	0	2.84409e-05	5.72988	27.573	53.4504	30	51.327	68.481	100001	100000	100001
34.2	88.1662	0	0	2.76131e-05	5.72988	27.573	53.4504	30	51.327	68.481	100001	100000	100001
34.25	88.1662	0	0	2.68094e-05	5.72988	27.573	53.4504	30	51.327	68.481	100001	100000	100001
34.3	88.1662	0	0	2.60292e-05	5.72988	27.573	53.4504	30	51.327	68.481	100001	100000	100001
34.35	88.1662	0	0	2.52716e-05	5.72988	27.573	53.4504	30	51.327	68.481	100001	100000	100001
34.4	88.1662	0	0	2.45361e-05	5.72988	27.573	53.4504	30	51.327	68.481	100001	100000	100001
34.45	88.1662	0	0	2.3822e-05	5.72988	27.573	53.4504	30	51.327	68.481	100001	100000	100001
34.5	88.1662	0	0	2.31287e-05	5.72988	27.573	53.4504	30	51.327	68.481	100001	100000	100001
34.55	88.1662	0	0	2.24555e-05	5.72988	27.573	53.4504	30	51.327	68.481	100001	100000	100001
34.6	88.1662	0	0	2.1802e-05	5.72988	27.573	53.4504	30	51.327	68.481	100001	100000	100001
34.65	88.1662	0	0	2.11674e-05	5.72988	27.573	53.4504	30	51.327	68.481	100001	100000	100001
34.7	88.1662	0	0	2.05514e-05	5.72988	27.573	53.4504	30	51.327	68.481	100001	100000	100001
34.75	88.1662	0	0	1.99532e-05	5.72988	27.573	53.4504	30	51.327	68.481	100001	100000	100001
34.8	88.1662	0	0	1.93725e-05	5.72988	27.573	53.4504	30	51.327	68.481	100001	100000	100001
34.85	88.1662	0	0	1.88087e-05	5.72988	27.573	53.4504	30	51.327	68.481	100001	100000	100001
34.9	88.1662	0	0	1.82613e-05	5.72988	27.573	53.4504	30	51.327	68.481	100001	100000	100001
34.95	88.1662	0	0	1.77298e-05	5.72988	27.573	53.4504	30	51.327	68.481	100001	100000	100001
35	88.1662	0	0	1.72138e-05	5.72988	27.573	53.4504	30	51.327	68.481	100001	100000	100001
35.05	88.1662	0	0	1.67128e-05	5.72988	27.573	53.4504	30	51.327	68.481	100001	100000	100001
35.1	88.1662	0	0	1.62264e-05	5.72988	27.573	53.4504	30	51.327	68.481	100001	100000	100001
35.15	88.1662	0	0	1.57541e-05	5.72988	27.573	53.4504	30	51.327	68.481	100001	100000	100001
35.2	88.1662	0	0	1.52956e-05	5.72988	27.573	53.4504	30	51.327	68.481	100001	100000	100001
35.25	88.1662	0	0	1.48504e-05	5.72988	27.573	53.4504	30	51.327	68.481	100001	100000	100001
35.3	88.1662	0	0	1.44182e-05	5.72988	27.573	53.4504	30	51.327	68.481	100001	100000	100001
35.35	88.1662	0	0	1.39986e-05	5.72988	27.573	53.4504	30	51.327	68.481	100001	100000	100001
35.4	88.1662	0	0	1.35912e-05	5.72988	27.573	53.4504	30	51.327	68.481	100001	100000	100001
35.45	88.1662	0	0	1.31956e-05	5.72988	27.573	53.4504	30	51.327	68.481	100001	100000	100001
35.5	88.1662	0	0	1.28116e-05	5.72988	27.573	53.4504	30	51.327	68.481	100001	100000	100001
35.55	88.1662	0	0	1.24387e-05	5.72988	27.573	53.4504	30	51.327	68.481	100001	100000	100001
35.6	88.1662	0	0	1.20767e-05	5.72988	27.573	53.4504	30	51.327	68.481	100001	100000	100001
35.65	88.1662	0	0	1.17252e-05	5.72988	27.573	53.4504	30	51.327	68.481	100001	100000	100001
35.7	88.1662	0	0	1.13839e-05	5.72988	27.573	53.4504	30	51.327	68.481	100001	100000	100001
35.75	88.1662	0	0	1.10526e-05	5.72988	27.573	53.4504	30	51.327	68.481	100001	100000	100001
35.8	88.1662	0	0	1.07309e-05	5.72988	27.573	53.4504	30	51.327	68.481	100001	100000	100001
35.85	88.1662	0	0	1.04186e-05	5.72988	27.573	53.4504	30	51.327	68.481	100001	100000	100001
35.9	88.1662	0	0	1.01154e-05	5.72989	27.573	53.4504	30	51.327	68.481	100001	100000	100001
35.95	88.1662	0	0	9.82099e-06	5.72989	27.573	53.4504	30	51.327	68.481	100001	100000	100001
36	88.1662	0	0	9.53516e-06	5.72989	27.573	53.4504	30	51.327	68.481	100001	100000	100001
36.05	88.1662	0	0	9.25764e-06	5.72989	27.573	53.4504	30	51.327	68.481	100001	100000	100001
36.1	88.1662	0	0	8.9882e-06	5.72989	27.573	53.4504	30	51.327	68.481	100001	100000	100001
36.15	88.1662	0	0	8.72661e-06	5.72989	27.573	53.4504	30	51.327	68.481	100001	100000	100001
36.2	88.1662	0	0	8.47263e-06	5.72989	27.573	53.4504	30	51.327	68.481	100001	100000	100001
36.25	88.1662	0	0	8.22604e-06	5.72989	27.573	53.4504	30	51.327	68.481	100001	100000	100001
36.3	88.1662	0	0	7.98663e-06	5.72989	27.573	53.4504	30	51.327	68.481	100001	100000	100001
36.35	88.1662	0	0	7.75418e-06	5.72989	27.573	53.4504	30	51.327	68.481	100001	100000	100001
36.4	88.1662	0	0	7.5285e-06	5.72989	27.573	53.4504	30	51.327	68.481	100001	100000	100001
36.45	88.1662	0	0	7.30939e-06	5.72989	27.573	53.4504	30	51.327	68.481	100001	100000	100001
36.5	88.1662	0	0	7.09665e-06	5.72989	27.573	53.4504	30	51.327	68.481	100001	100000	100001
36.55	88.1662	0	0	6.89011e-06	5.72989	27.573	53.4504	30	51.327	68.481	100001	100000	100001
36.6	88.1662	0	0	6.68958e-06	5.72989	27.573	53.4504	30	51.327	68.481	100001	100000	100001
36.65	88.1662	0	0	6.49488e-06	5.72989	27.573	53.4504	30	51.327	68.481	100001	100000	100001
36.7	88.1662	0	0	6.30585e-06	5.72989	27.573	53.4504	30	51.327	68.481	100001	100000	100001
36.75	88.1662	0	0	6.12232e-06	5.72989	27.573	53.4504	30	51.327	68.481	100001	100000	100001
36.8	88.1662	0	0	5.94414e-06	5.72989	27.573	53.4504	30	51.327	68.481	100001	100000	100001
36.85	88.1662	0	0	5.77114e-06	5.72989	27.573	53.4504	30	51.327	68.481	100001	100000	100001
36.9	88.1662	0	0	5.60317e-06	5.72989	27.573	53.4504	30	51.327	68.481	100001	100000	100001
36.95	88.1662	0	0	5.4401e-06	5.72989	27.573	53.4504	30	51.327	68.481	100001	100000	100001
37	88.1662	0	0	5.28177e-06	5.72989	27.573	53.4504	30	51.327	68.481	100001	100000	100001
37.05	88.1662	0	0	5.12804e-06	5.72989	27.573	53.4504	30	51.327	68.481	100001	100000	100001
37.1	88.1662	0	0	4.9788e-06	5.72989	27.573	53.4504	30	51.327	68.481	100001	100000	100001
37.15	88.1662	0	0	4.83389e-06	5.72989	27.573	53.4504	30	51.327	68.481	100001	100000	100001
37.2	88.1662	0	0	4.6932e-06	5.72989	27.573	53.4504	30	51.327	68.481	100001	100000	100001
37.25	88.1662	0	0	4.55661e-06	5.72989	27.573	53.4504	30	51.327	68.481	100001	100000	100001
37.3	88.1662	0	0	4.42399e-06	5.72989	27.573	53.4504	30	51.327	68.481	100001	100000	100001
37.35	88.1662	0	0	4.29524e-06	5.72989	27.573	53.4504	30	51.327	68.481	100001	100000	100001
37.4	88.1662	0	0	4.17023e-06	5.72989	27.573	53.4504	30	51.327	68.481	100001	100000	100001
37.45	88.1662	0	0	4.04886e-06	5.72989	27.573	53.4504	30	51.327	68.481	100001	100000	100001
37.5	88.1662	0	0	3.93102e-06	5.72989	27.573	53.4504	30	51.327	68.481	100001	100000	100001
37.55	88.1662	0	0	3.81661e-06	5.72989	27.573	53.4504	30	51.327	68.481	100001	100000	100001
37.6	88.1662	0	0	3.70553e-06	5.72989	27.573	53.4504	30	51.327	68.481	100001	100000	100001
37.65	88.1662	0	0	3.59768e-06	5.72989	27.573	53.4504	30	51.327	68.481	100001	100000	100001
37.7	88.1662	0	0	3.49297e-06	5.72989	27.573	53.4504	30	51.327	68.481	100001	100000	100001
37.75	88.1662	0	0	3.39131e-06	5.72989	27.573	53.4504	30	51.327	68.481	100001	100000	100001
37.8	88.1662	0	0	3.29261e-06	5.72989	27.573	53.4504	30	51.327	68.481	100001	100000	100001
37.85	88.1662	0	0	3.19678e-06	5.72989	27.573	53.4504	30	51.327	68.481	100001	100000	100001
37.9	88.1662	0	0	3.10374e-06	5.72989	27.573	53.4504	30	51.327	68.481	100001	100000	100001
37.95	88.1662	0	0	3.01341e-06	5.72989	27.573	53.4504	30	51.327	68.481	100001	100000	100001
38	88.1662	0	0	2.9257e-06	5.72989	27.573	53.4504	30	51.327	68.481	100001	100000	100001
38.05	88.1662	0	0	2.84055e-06	5.72989	27.573	53.4504	30	51.327	68.481	100001	100000	100001
38.1	88.1662	0	0	2.75788e-06	5.72989	27.573	53.4504	30	51.327	68.481	100001	100000	100001
38.15	88.1662	0	0	2.67762e-06	5.72989	27.573	53.4504	30	51.327	68.481	100001	100000	100001
38.2	88.1662	0	0	2.59969e-06	5.72989	27.573	53.4504	30	51.327	68.481	100001	100000	100001
38.25	88.1662	0	0	2.52402e-06	5.72989	27.573	53.4504	30	51.327	68.481	100001	100000	100001
38.3	88.1662	0	0	2.45056e-06	5.72989	27.573	53.4504	30	51.327	68.481	100001	100000	100001
38.35	88.1662	0	0	2.37924e-06	5.72989	27.573	53.4504	30	51.327	68.481	100001	100000	100001
38.4	88.1662	0	0	2.31e-06	5.72989	27.573	53.4504	30	51.327	68.481	100001	100000	100001
38.45	88.1662	0	0	2.24276e-06	5.72989	27.573	53.4504	30	51.327	68.481	100001	100000	100001
38.5	88.1662	0	0	2.17749e-06	5.72989	27.573	53.4504	30	51.327	68.481	100001	100000	100001
38.55	88.1662	0	0	2.11412e-06	5.72989	27.573	53.4504	30	51.327	68.481	100001	100000	100001
38.6	88.1662	0	0	2.05259e-06	5.72989	27.573	53.4504	30	51.327	68.481	100001	100000	100001
38.65	88.1662	0	0	1.99285e-06	5.72989	27.573	53.4504	30	51.327	68.481	100001	100000	100001
38.7	88.1662	0	0	1.93485e-06	5.72989	27.573	53.4504	30	51.327	68.481	100001	100000	100001
38.75	88.1662	0	0	1.87853e-06	5.72989	27.573	53.4504	30	51.327	68.481	100001	100000	100001
38.8	88.1662	0	0	1.82386e-06	5.72989	27.573	53.4504	30	51.327	68.481	100001	100000	100001
38.85	88.1662	0	0	1.77078e-06	5.72989	27.573	53.4504	30	51.327	68.481	100001	100000	100001
38.9	88.1662	0	0	1.71924e-06	5.72989	27.573	53.4504	30	51.327	68.481	100001	100000	100001
38.95	88.1662	0	0	1.6692e-06	5.72989	27.573	53.4504	30	51.327	68.481	100001	100000	100001
39	88.1662	0	0	1.62062e-06	5.72989	27.573	53.4504	30	51.327	68.481	100001	100000	100001
39.05	88.1662	0	0	1.57346e-06	5.72989	27.573	53.4504	30	51.327	68.481	100001	100000	100001
39.1	88.1662	0	0	1.52766e-06	5.72989	27.573	53.4504	30	51.327	68.481	100001	100000	100001
39.15	88.1662	0	0	1.4832e-06	5.72989	27.573	53.4504	30	51.327	68.481	100001	100000	100001
39.2	88.1662	0	0	1.44003e-06	5.72989	27.573	53.4504	30	51.327	68.481	100001	100000	100001
39.25	88.1662	0	0	1.39812e-06	5.72989	27.573	53.4504	30	51.327	68.481	100001	100000	100001
39.3	88.1662	0	0	1.35743e-06	5.72989	27.573	53.4504	30	51.327	68.481	100001	100000	100001
39.35	88.1662	0	0	1.31792e-06	5.72989	27.573	53.4504	30	51.327	68.481	100001	100000	100001
39.4	88.1662	0	0	1.27956e-06	5.72989	27.573	53.4504	30	51.327	68.481	100001	100000	100001
39.45	88.1662	0	0	1.24232e-06	5.72989	27.573	53.4504	30	51.327	68.481	100001	100000	100001
39.5	88.1662	0	0	1.20617e-06	5.72989	27.573	53.4504	30	51.327	68.481	100001	100000	100001
39.55	88.1662	0	0	1.17106e-06	5.72989	27.573	53.4504	30	51.327	68.481	100001	100000	100001
39.6	88.1662	0	0	1.13698e-06	5.72989	27.573	53.4504	30	51.327	68.481	100001	100000	100001
39.65	88.1662	0	0	1.10389e-06	5.72989	27.573	53.4504	30	51.327	68.481	100001	100000	100001
39.7	88.1662	0	0	1.07176e-06	5.72989	27.573	53.4504	30	51.327	68.481	100001	100000	100001
39.75	88.1662	0	0	1.04057e-06	5.72989	27.573	53.4504	30	51.327	68.481	100001	100000	100001
39.8	88.1662	0	0	1.01028e-06	5.72989	27.573	53.4504	30	51.327	68.481	100001	100000	100001
39.85	88.1662	0	0	9.80879e-07	5.72989	27.573	53.4504	30	51.327	68.481	100001	100000	100001
39.9	88.1662	0	0	9.52331e-07	5.72989	27.573	53.4504	30	51.327	68.481	100001	100000	100001
39.95	88.1662	0	0	9.24614e-07	5.72989	27.573	53.4504	30	51.327	68.481	100001	100000	100001
40	88.1662	0	0	8.97704e-07	5.72989	27.573	53.4504	30	51.327	68.481	100001	100000	100001
40.05	88.1662	0	0	8.71577e-07	5.72989	27.573	53.4504	30	51.327	68.481	100001	100000	100001
40.1	88.1662	0	0	8.4621e-07	5.72989	27.573	53.4504	30	51.327	68.481	100001	100000	100001
40.15	88.1662	0	0	8.21582e-07	5.72989	27.573	53.4504	30	51.327	68.481	100001	100000	100001
40.2	88.1662	0	0	7.9767e-07	5.72989	27.573	53.4504	30	51.327	68.481	100001	100000	100001
40.25	88.1662	0	0	7.74454e-07	5.72989	27.573	53.4504	30	51.327	68.481	100001	100000	100001
40.3	88.1662	0	0	7.51915e-07	5.72989	27.573	53.4504	30	51.327	68.481	100001	100000	100001
40.35	88.1662	0	0	7.30031e-07	5.72989	27.573	53.4504	30	51.327	68.481	100001	100000	100001
40.4	88.1662	0	0	7.08784e-07	5.72989	27.573	53.4504	30	51.327	68.481	100001	100000	100001
40.45	88.1662	0	0	6.88155e-07	5.72989	27.573	53.4504	30	51.327	68.481	100001	100000	100001
40.5	88.1662	0	0	6.68126e-07	5.72989	27.573	53.4504	30	51.327	68.481	100001	100000	100001
40.55	88.1662	0	0	6.48681e-07	5.72989	27.573	53.4504	30	51.327	68.481	100001	100000	100001
40.6	88.1662	0	0	6.29802e-07	5.72989	27.573	53.4504	30	51.327	68.481	100001	100000	100001
40.65	88.1662	0	0	6.11472e-07	5.72989	27.573	53.4504	30	51.327	68.481	100001	100000	100001
40.7	88.1662	0	0	5.93675e-07	5.72989	27.573	53.4504	30	51.327	68.481	100001	100000	100001
40.75	88.1662	0	0	5.76397e-07	5.72989	27.573	53.4504	30	51.327	68.481	100001	100000	100001
40.8	88.1662	0	0	5.59621e-07	5.72989	27.573	53.4504	30	51.327	68.481	100001	100000	100001
40.85	88.1662	0	0	5.43334e-07	5.72989	27.573	53.4504	30	51.327	68.481	100001	100000	100001
40.9	88.1662	0	0	5.27521e-07	5.72989	27.573	53.4504	30	51.327	68.481	100001	100000	100001
40.95	88.1662	0	0	5.12167e-07	5.72989	27.573	53.4504	30	51.327	68.481	100001	100000	100001
41	88.1662	0	0	4.97261e-07	5.72989	27.573	53.4504	30	51.327	68.481	100001	100000	100001
41.05	88.1662	0	0	4.82788e-07	5.72989	27.573	53.4504	30	51.327	68.481	100001	100000	100001
41.1	88.1662	0	0	4.68737e-07	5.72989	27.573	53.4504	30	51.327	68.481	100001	100000	100001
41.15	88.1662	0	0	4.55095e-07	5.72989	27.573	53.4504	30	51.327	68.481	100001	100000	100001
41.2	88.1662	0	0	4.4185e-07	5.72989	27.573	53.4504	30	51.327	68.481	100001	100000	100001
41.25	88.1662	0	0	4.2899e-07	5.72989	27.573	53.4504	30	51.327	68.481	100001	100000	100001
41.3	88.1662	0	0	4.16504e-07	5.72989	27.573	53.4504	30	51.327	68.481	100001	100000	100001
41.35	88.1662	0	0	4.04382e-07	5.72989	27.573	53.4504	30	51.327	68.481	100001	100000	100001
41.4	88.1662	0	0	3.92613e-07	5.72989	27.573	53.4504	30	51.327	68.481	100001	100000	100001
41.45	88.1662	0	0	3.81187e-07	5.72989	27.573	53.4504	30	51.327	68.481	100001	100000	100001
41.5	88.1662	0	0	3.70092e-07	5.72989	27.573	53.4504	30	51.327	68.481	100001	100000	100001
41.55	88.1662	0	0	3.59321e-07	5.72989	27.573	53.4504	30	51.327	68.481	100001	100000	100001
41.6	88.1662	0	0	3.48863e-07	5.72989	27.573	53.4504	30	51.327	68.481	100001	100000	100001
41.65	88.1662	0	0	3.3871e-07	5.72989	27.573	53.4504	30	51.327	68.481	100001	100000	100001
41.7	88.1662	0	0	3.28852e-07	5.72989	27.573	53.4504	30	51.327	68.481	100001	100000	100001
41.75	88.1662	0	0	3.19281e-07	5.72989	27.573	53.4504	30	51.327	68.481	100001	100000	100001
41.8	88.1662	0	0	3.09988e-07	5.72989	27.573	53.4504	30	51.327	68.481	100001	100000	100001
41.85	88.1662	0	0	3.00966e-07	5.72989	27.573	53.4504	30	51.327	68.481	100001	100000	100001
41.9	88.1662	0	0	2.92207e-07	5.72989	27.573	53.4504	30	51.327	68.481	100001	100000	100001
41.95	88.1662	0	0	2.83703e-07	5.72989	27.573	53.4504	30	51.327	68.481	100001	100000	100001
42	88.1662	0	0	2.75446e-07	5.72989	27.573	53.4504	30	51.327	68.481	100001	100000	100001
42.05	88.1662	0	0	2.67429e-07	5.72989	27.573	53.4504	30	51.327	68.481	100001	100000	100001
42.1	88.1662	0	0	2.59645e-07	5.72989	27.573	53.4504	30	51.327	68.481	100001	100000	100001
42.15	88.1662	0	0	2.52089e-07	5.72989	27.573	53.4504	30	51.327	68.481	100001	100000	100001
42.2	88.1662	0	0	2.44752e-07	5.72989	27.573	53.4504	30	51.327	68.481	100001	100000	100001
42.25	88.1662	0	0	2.37629e-07	5.72989	27.573	53.4504	30	51.327	68.481	100001	100000	100001
42.3	88.1662	0	0	2.30713e-07	5.72989	27.573	53.4504	30	51.327	68.481	100001	100000	100001
42.35	88.1662	0	0	2.23998e-07	5.72989	27.573	53.4504	30	51.327	68.481	100001	100000	100001
42.4	88.1662	0	0	2.17478e-07	5.72989	27.573	53.4504	30	51.327	68.481	100001	100000	100001
42.45	88.1662	0	0	2.11149e-07	5.72989	27.573	53.4504	30	51.327	68.481	100001	100000	100001
42.5	88.1662	0	0	2.05004e-07	5.72989	27.573	53.4504	30	51.327	68.481	100001	100000	100001
42.55	88.1662	0	0	1.99037e-07	5.72989	27.573	53.4504	30	51.327	68.481	100001	100000	100001
42.6	88.1662	0	0	1.93245e-07	5.72989	27.573	53.4504	30	51.327	68.481	100001	100000	100001
42.65	88.1662	0	0	1.8762e-07	5.72989	27.573	53.4504	30	51.327	68.481	100001	100000	100001
42.7	88.1662	0	0	1.8216e-07	5.72989	27.573	53.4504	30	51.327	68.481	100001	100000	100001
42.75	88.1662	0	0	1.76858e-07	5.72989	27.573	53.4504	30	51.327	68.481	100001	100000	100001
42.8	88.1662	0	0	1.71711e-07	5.72989	27.573	53.4504	30	51.327	68.481	100001	100000	100001
42.85	88.1662	0	0	1.66714e-07	5.72989	27.573	53.4504	30	51.327	68.481	100001	100000	100001
42.9	88.1662	0	0	1.61862e-07	5.72989	27.573	53.4504	30	51.327	68.481	100001	100000	100001
42.95	88.1662	0	0	1.57151e-07	5.72989	27.573	53.4504	30	51.327	68.481	100001	100000	100001
43	88.1662	0	0	1.52578e-07	5.72989	27.573	53.4504	30	51.327	68.481	100001	100000	100001
43.05	88.1662	0	0	1.48137e-07	5.72989	27.573	53.4504	30	51.327	68.481	100001	100000	100001
43.1	88.1662	0	0	1.43826e-07	5.72989	27.573	53.4504	30	51.327	68.481	100001	100000	100001
43.15	88.1662	0	0	1.3964e-07	5.72989	27.573	53.4504	30	51.327	68.481	100001	100000	100001
43.2	88.1662	0	0	1.35576e-07	5.72989	27.573	53.4504	30	51.327	68.481	100001	100000	100001
43.25	88.1662	0	0	1.3163e-07	5.72989	27.573	53.4504	30	51.327	68.481	100001	100000	100001
43.3	88.1662	0	0	1.27799e-07	5.72989	27.573	53.4504	30	51.327	68.481	100001	100000	100001
43.35	88.1662	0	0	1.2408e-07	5.72989	27.573	53.4504	30	51.327	68.481	100001	100000	100001
43.4	88.1662	0	0	1.20469e-07	5.72989	27.573	53.4504	30	51.327	68.481	100001	100000	100001
43.45	88.1662	0	0	1.16963e-07	5.72989	27.573	53.4504	30	51.327	68.481	100001	100000	100001
43.5	88.1662	0	0	1.13559e-07	5.72989	27.573	53.4504	30	51.327	68.481	100001	100000	100001
43.55	88.1662	0	0	1.10254e-07	5.72989	27.573	53.4504	30	51.327	68.481	100001	100000	100001
43.6	88.1662	0	0	1.07045e-07	5.72989	27.573	53.4504	30	51.327	68.481	100001	100000	100001
43.65	88.1662	0	0	1.0393e-07	5.72989	27.573	53.4504	30	51.327	68.481	100001	100000	100001
43.7	88.1662	0	0	1.00905e-07	5.72989	27.573	53.4504	30	51.327	68.481	100001	100000	100001
43.75	88.1662	0	0	9.79682e-08	5.72989	27.573	53.4504	30	51.327	68.481	100001	100000	100001
43.8	88.1662	0	0	9.5117e-08	5.72989	27.573	53.4504	30	51.327	68.481	100001	100000	100001
43.85	88.1662	0	0	9.23488e-08	5.72989	27.573	53.4504	30	51.327	68.481	100001	100000	100001
43.9	88.1662	0	0	8.96611e-08	5.72989	27.573	53.4504	30	51.327	68.481	100001	100000	100001
43.95	88.1662	0	0	8.70516e-08	5.72989	27.573	53.4504	30	51.327	68.481	100001	100000	100001
44	88.1662	0	0	8.45181e-08	5.72989	27.573	53.4504	30	51.327	68.481	100001	100000	100001
44.05	88.1662	0	0	8.20583e-08	5.72989	27.573	53.4504	30	51.327	68.481	100001	100000	100001
44.1	88.1662	0	0	7.96701e-08	5.72989	27.573	53.4504	30	51.327	68.481	100001	100000	100001
44.15	88.1662	0	0	7.73515e-08	5.72989	27.573	53.4504	30	51.327	68.481	100001	100000	100001
44.2	88.1662	0	0	7.51003e-08	5.72989	27.573	53.4504	30	51.327	68.481	100001	100000	100001
44.25	88.1662	0	0	7.29146e-08	5.72989	27.573	53.4504	30	51.327	68.481	100001	100000	100001
44.3	88.1662	0	0	7.07925e-08	5.72989	27.573	53.4504	30	51.327	68.481	100001	100000	100001
44.35	88.1662	0	0	6.87322e-08	5.72989	27.573	53.4504	30	51.327	68.481	100001	100000	100001
44.4	88.1662	0	0	6.67319e-08	5.72989	27.573	53.4504	30	51.327	68.481	100001	100000	100001
44.45	88.1662	0	0	6.47898e-08	5.72989	27.573	53.4504	30	51.327	68.481	100001	100000	100001
44.5	88.1662	0	0	6.29041e-08	5.72989	27.573	53.4504	30	51.327	68.481	100001	100000	100001
44.55	88.1662	0	0	6.10734e-08	5.72989	27.573	53.4504	30	51.327	68.481	100001	100000	100001
44.6	88.1662	0	0	5.9296e-08	5.72989	27.573	53.4504	30	51.327	68.481	100001	100000	100001
44.65	88.1662	0	0	5.75703e-08	5.72989	27.573	53.4504	30	51.327	68.481	100001	100000	100001
44.7	88.1662	0	0	5.58948e-08	5.72989	27.573	53.4504	30	51.327	68.481	100001	100000	100001
44.75	88.1662	0	0	5.42681e-08	5.72989	27.573	53.4504	30	51.327	68.481	100001	100000	100001
44.8	88.1662	0	0	5.26887e-08	5.72989	27.573	53.4504	30	51.327	68.481	100001	100000	100001
44.85	88.1662	0	0	5.11552e-08	5.72989	27.573	53.4504	30	51.327	68.481	100001	100000	100001
44.9	88.1662	0	0	4.96664e-08	5.72989	27.573	53.4504	30	51.327	68.481	100001	100000	100001
44.95	88.1662	0	0	4.8221e-08	5.72989	27.573	53.4504	30	51.327	68.481	100001	100000	100001
45	88.1662	0	0	4.68176e-08	5.72989	27.573	53.4504	30	51.327	68.481	100001	100000	100001
45.05	88.1662	0	0	4.5455e-08	5.72989	27.573	53.4504	30	51.327	68.481	100001	100000	100001
45.1	88.1662	0	0	4.41321e-08	5.72989	27.573	53.4504	30	51.327	68.481	100001	100000	100001
45.15	88.1662	0	0	4.28477e-08	5.72989	27.573	53.4504	30	51.327	68.481	100001	100000	100001
45.2	88.1662	0	0	4.16007e-08	5.72989	27.573	53.4504	30	51.327	68.481	100001	100000	100001
45.25	88.1662	0	0	4.039e-08	5.72989	27.573	53.4504	30	51.327	68.481	100001	100000	100001
45.3	88.1662	0	0	3.92145e-08	5.72989	27.573	53.4504	30	51.327	68.481	100001	100000	100001
45.35	88.1662	0	0	3.80732e-08	5.72989	27.573	53.4504	30	51.327	68.481	100001	100000	100001
45.4	88.1662	0	0	3.69651e-08	5.72989	27.573	53.4504	30	51.327	68.481	100001	100000	100001
45.45	88.1662	0	0	3.58893e-08	5.72989	27.573	53.4504	30	51.327	68.481	100001	100000	100001
45.5	88.1662	0	0	3.48448e-08	5.72989	27.573	53.4504	30	51.327	68.481	100001	100000	100001
45.55	88.1662	0	0	3.38307e-08	5.72989	27.573	53.4504	30	51.327	68.481	100001	100000	100001
45.6	88.1662	0	0	3.28461e-08	5.72989	27.573	53.4504	30	51.327	68.481	100001	100000	100001
45.65	88.1662	0	0	3.18902e-08	5.72989	27.573	53.4504	30	51.327	68.481	100001	100000	100001
45.7	88.1662	0	0	3.09621e-08	5.72989	27.573	53.4504	30	51.327	68.481	100001	100000	100001
45.75	88.1662	0	0	3.0061e-08	5.72989	27.573	53.4504	30	51.327	68.481	100001	100000	100001
45.8	88.1662	0	0	2.91861e-08	5.72989	27.573	53.4504	30	51.327	68.481	100001	100000	100001
45.85	88.1662	0	0	2.83367e-08	5.72989	27.573	53.4504	30	51.327	68.481	100001	100000	100001
45.9	88.1662	0	0	2.7512e-08	5.72989	27.573	53.4504	30	51.327	68.481	100001	100000	100001
45.95	88.1662	0	0	2.67113e-08	5.72989	27.573	53.4504	30	51.327	68.481	100001	100000	100001
46	88.1662	0	0	2.59339e-08	5.72989	27.573	53.4504	30	51.327	68.481	100001	100000	100001
46.05	88.1662	0	0	2.51791e-08	5.72989	27.573	53.4504	30	51.327	68.481	100001	100000	100001
46.1	88.1662	0	0	2.44463e-08	5.72989	27.573	53.4504	30	51.327	68.481	100001	100000	100001
46.15	88.1662	0	0	2.37349e-08	5.72989	27.573	53.4504	30	51.327	68.481	100001	100000	100001
46.2	88.1662	0	0	2.30441e-08	5.72989	27.573	53.4504	30	51.327	68.481	100001	100000	100001
46.25	88.1662	0	0	2.23735e-08	5.72989	27.573	53.4504	30	51.327	68.481	100001	100000	100001
46.3	88.1662	0	0	2.17224e-08	5.72989	27.573	53.4504	30	51.327	68.481	100001	100000	100001
46.35	88.1662	0	0	2.10903e-08	5.72989	27.573	53.4504	30	51.327	68.481	100001	100000	100001
46.4	88.1662	0	0	2.04765e-08	5.72989	27.573	53.4504	30	51.327	68.481	100001	100000	100001
46.45	88.1662	0	0	1.98807e-08	5.72989	27.573	53.4504	30	51.327	68.481	100001	100000	100001
46.5	88.1662	0	0	1.93022e-08	5.72989	27.573	53.4504	30	51.327	68.481	100001	100000	100001
46.55	88.1662	0	0	1.87405e-08	5.72989	27.573	53.4504	30	51.327	68.481	100001	100000	100001
46.6	88.1662	0	0	1.81952e-08	5.72989	27.573	53.4504	30	51.327	68.481	100001	100000	100001
46.65	88.1662	0	0	1.76658e-08	5.72989	27.573	53.4504	30	51.327	68.481	100001	100000	100001
46.7	88.1662	0	0	1.71518e-08	5.72989	27.573	53.4504	30	51.327	68.481	100001	100000	100001
46.75	88.1662	0	0	1.66529e-08	5.72989	27.573	53.4504	30	51.327	68.481	100001	100000	100001
46.8	88.1662	0	0	1.61684e-08	5.72989	27.573	53.4504	30	51.327	68.481	100001	100000	100001
46.85	88.1662	0	0	1.5698e-08	5.72989	27.573	53.4504	30	51.327	68.481	100001	100000	100001
46.9	88.1662	0	0	1.52413e-08	5.72989	27.573	53.4504	30	51.327	68.481	100001	100000	100001
46.95	88.1662	0	0	1.47979e-08	5.72989	27.573	53.4504	30	51.327	68.481	100001	100000	100001
47	88.1662	0	0	1.43672e-08	5.72989	27.573	53.4504	30	51.327	68.481	100001	100000	100001
47.05	88.1662	0	0	1.39492e-08	5.72989	27.573	53.4504	30	51.327	68.481	100001	100000	100001
47.1	88.1662	0	0	1.35435e-08	5.72989	27.573	53.4504	30	51.327	68.481	100001	100000	100001
47.15	88.1662	0	0	1.31495e-08	5.72989	27.573	53.4504	30	51.327	68.481	100001	100000	100001
47.2	88.1662	0	0	1.2767e-08	5.72989	27.573	53.4504	30	51.327	68.481	100001	100000	100001
47.25	88.1662	0	0	1.23956e-08	5.72989	27.573	53.4504	30	51.327	68.481	100001	100000	100001
47.3	88.1662	0	0	1.2035e-08	5.72989	27.573	53.4504	30	51.327	68.481	100001	100000	100001
47.35	88.1662	0	0	1.16848e-08	5.72989	27.573	53.4504	30	51.327	68.481	100001	100000	100001
47.4	88.1662	0	0	1.13448e-08	5.72989	27.573	53.4504	30	51.327	68.481	100001	100000	100001
47.45	88.1662	0	0	1.10146e-08	5.72989	27.573	53.4504	30	51.327	68.481	100001	100000	100001
47.5	88.1662	0	0	1.06942e-08	5.72989	27.573	53.4504	30	51.327	68.481	100001	100000	100001
47.55	88.1662	0	0	1.0383e-08	5.72989	27.573	53.4504	30	51.327	68.481	100001	100000	100001
47.6	88.1662	0	0	1.00809e-08	5.72989	27.573	53.4504	30	51.327	68.481	100001	100000	100001
47.65	88.1662	0	0	9.78759e-09	5.72989	27.573	53.4504	30	51.327	68.481	100001	100000	100001
47.7	88.1662	0	0	9.50279e-09	5.72989	27.573	53.4504	30	51.327	68.481	100001	100000	100001
47.75	88.1662	0	0	9.22625e-09	5.72989	27.573	53.4504	30	51.327	68.481	100001	100000	100001
47.8	88.1662	0	0	8.95774e-09	5.72989	27.573	53.4504	30	51.327	68.481	100001	100000	100001
47.85	88.1662	0	0	8.69703e-09	5.72989	27.573	53.4504	30	51.327	68.481	100001	100000	100001
47.9	88.1662	0	0	8.44394e-09	5.72989	27.573	53.4504	30	51.327	68.481	100001	100000	100001
47.95	88.1662	0	0	8.19823e-09	5.72989	27.573	53.4504	30	51.327	68.481	100001	100000	100001
48	88.1662	0	0	7.95967e-09	5.72989	27.573	53.4504	30	51.327	68.481	100001	100000	100001
48.05	88.1662	0	0	7.72806e-09	5.72989	27.573	53.4504	30	51.327	68.481	100001	100000	100001

## Sheet: FP4
Time	RI	FP	BH	fructose	formate	acetate	butyrate	unknown compound	H20	CO2	lag_RI	lag_FP	lag_BH
0.05	0	0.00606716	0	49.4634	0.535882	47.5937	0.105928	30	0	3.72584e-09	0.103873	1.12733e-05	0.110518
0.1	0	0.00606716	0	49.4634	0.535882	47.5937	0.105928	30	0	7.92591e-09	0.107896	1.27088e-05	0.122141
0.15	0	0.00606717	0	49.4634	0.535882	47.5937	0.105928	30	0	1.26608e-08	0.112075	1.4327e-05	0.134987
0.2	0	0.00606717	0	49.4634	0.535882	47.5937	0.105928	30	0	1.79988e-08	0.116416	1.61513e-05	0.149184
0.25	0	0.00606717	0	49.4634	0.535882	47.5937	0.105928	30	0	2.40164e-08	0.120925	1.82079e-05	0.164874
0.3	0	0.00606718	0	49.4634	0.535882	47.5937	0.105928	30	0	3.08001e-08	0.125609	2.05263e-05	0.182214
0.35	0	0.00606718	0	49.4634	0.535882	47.5937	0.105928	30	0	3.84474e-08	0.130474	2.31399e-05	0.201378
0.4	0	0.00606719	0	49.4634	0.535882	47.5937	0.105928	30	0	4.70684e-08	0.135527	2.60863e-05	0.222557
0.45	0	0.0060672	0	49.4634	0.535882	47.5937	0.105928	30	0	5.67872e-08	0.140776	2.94078e-05	0.245963
0.5	0	0.0060672	0	49.4634	0.535882	47.5937	0.105928	30	0	6.77434e-08	0.146229	3.31523e-05	0.271832
0.55	0	0.00606721	0	49.4634	0.535882	47.5937	0.105928	30	0	8.00948e-08	0.151892	3.73736e-05	0.300421
0.6	0	0.00606722	0	49.4634	0.535882	47.5937	0.105928	30	0	9.4019e-08	0.157775	4.21324e-05	0.332017
0.65	0	0.00606723	0	49.4634	0.535883	47.5937	0.105928	30	0	1.09716e-07	0.163886	4.74972e-05	0.366936
0.7	0	0.00606724	0	49.4634	0.535883	47.5937	0.105928	30	0	1.27411e-07	0.170233	5.35449e-05	0.405527
0.75	0	0.00606725	0	49.4634	0.535883	47.5937	0.105928	30	0	1.47359e-07	0.176827	6.03626e-05	0.448177
0.8	0	0.00606727	0	49.4634	0.535883	47.5937	0.105928	30	0	1.69847e-07	0.183676	6.80485e-05	0.495312
0.85	0	0.00606728	0	49.4634	0.535883	47.5937	0.105928	30	0	1.95199e-07	0.19079	7.6713e-05	0.547404
0.9	0	0.0060673	0	49.4634	0.535883	47.5937	0.105929	30	0	2.23778e-07	0.198179	8.64807e-05	0.604975
0.95	0	0.00606732	0	49.4634	0.535883	47.5937	0.105929	30	0	2.55995e-07	0.205855	9.74921e-05	0.668601
1	0	0.00606734	0	49.4634	0.535883	47.5937	0.105929	30	0	2.92315e-07	0.213828	0.000109906	0.738919
1.05	0	0.00606737	0	49.4634	0.535883	47.5937	0.105929	30	0	3.33259e-07	0.22211	0.0001239	0.816631
1.1	0	0.0060674	0	49.4634	0.535883	47.5937	0.105929	30	0	3.79415e-07	0.230712	0.000139675	0.902517
1.15	0	0.00606743	0	49.4634	0.535883	47.5937	0.105929	30	0	4.31448e-07	0.239648	0.00015746	0.997436
1.2	0	0.00606747	0	49.4634	0.535883	47.5937	0.105929	30	0	4.90106e-07	0.24893	0.000177509	1.10234
1.25	0	0.00606751	0	49.4634	0.535883	47.5937	0.105929	30	0	5.56231e-07	0.258571	0.000200111	1.21827
1.3	0	0.00606755	0	49.4634	0.535883	47.5937	0.105929	30	0	6.30775e-07	0.268586	0.000225591	1.3464
1.35	0	0.00606761	0	49.4634	0.535883	47.5937	0.105929	30	0	7.14808e-07	0.278989	0.000254315	1.488
1.4	0	0.00606767	0	49.4634	0.535883	47.5937	0.105929	30	0	8.09539e-07	0.289794	0.000286696	1.64449
1.45	0	0.00606773	0	49.4634	0.535883	47.5937	0.105929	30	0	9.1633e-07	0.301018	0.000323201	1.81745
1.5	0	0.00606781	0	49.4634	0.535883	47.5937	0.10593	30	0	1.03671e-06	0.312677	0.000364353	2.00859
1.55	0	0.00606789	0	49.4634	0.535884	47.5937	0.10593	30	0	1.17242e-06	0.324787	0.000410745	2.21984
1.6	0	0.00606799	0	49.4634	0.535884	47.5937	0.10593	30	0	1.32541e-06	0.337367	0.000463045	2.4533
1.65	0	0.0060681	0	49.4634	0.535884	47.5937	0.10593	30	0	1.49786e-06	0.350433	0.000522003	2.71131
1.7	0	0.00606822	0	49.4634	0.535884	47.5937	0.105931	30	0	1.69227e-06	0.364006	0.000588469	2.99647
1.75	0	0.00606835	0	49.4634	0.535884	47.5937	0.105931	30	0	1.91141e-06	0.378105	0.000663397	3.31161
1.8	0	0.00606851	0	49.4634	0.535885	47.5937	0.105931	30	0	2.15845e-06	0.392749	0.000747866	3.65989
1.85	0	0.00606868	0	49.4634	0.535885	47.5937	0.105932	30	0	2.43693e-06	0.407961	0.00084309	4.04481
1.9	0	0.00606888	0	49.4634	0.535885	47.5937	0.105932	30	0	2.75084e-06	0.423761	0.000950439	4.4702
1.95	0	0.0060691	0	49.4634	0.535886	47.5937	0.105933	30	0	3.10469e-06	0.440174	0.00107146	4.94034
2	0	0.00606935	0	49.4634	0.535886	47.5937	0.105933	30	0	3.50356e-06	0.457223	0.00120788	5.45992
2.05	0	0.00606963	0	49.4634	0.535887	47.5937	0.105934	30	0	3.95317e-06	0.474932	0.00136168	6.03415
2.1	0	0.00606995	0	49.4634	0.535887	47.5937	0.105935	30	0	4.45998e-06	0.493326	0.00153506	6.66876
2.15	0	0.0060703	0	49.4634	0.535888	47.5937	0.105935	30	0	5.03124e-06	0.512433	0.00173052	7.37012
2.2	0	0.00607071	0	49.4634	0.535888	47.5937	0.105936	30	0	5.67514e-06	0.532281	0.00195086	8.14525
2.25	0	0.00607116	0	49.4634	0.535889	47.5937	0.105937	30	0	6.40091e-06	0.552896	0.00219926	9.00189
2.3	0	0.00607167	0	49.4634	0.53589	47.5937	0.105938	30	0	7.21895e-06	0.574311	0.00247929	9.94863
2.35	0	0.00607225	0	49.4634	0.535891	47.5937	0.10594	30	0	8.14095e-06	0.596555	0.00279497	10.9949
2.4	0	0.0060729	0	49.4634	0.535892	47.5937	0.105941	30	0	9.1801e-06	0.61966	0.00315085	12.1513
2.45	0	0.00607363	0	49.4634	0.535893	47.5937	0.105943	30	0	1.03513e-05	0.64366	0.00355204	13.4292
2.5	0	0.00607445	0	49.4634	0.535895	47.5937	0.105945	30	0	1.16711e-05	0.66859	0.00400431	14.8416
2.55	0	0.00607538	0	49.4634	0.535896	47.5937	0.105947	30	0	1.31586e-05	0.694485	0.00451417	16.4025
2.6	0	0.00607643	0	49.4634	0.535898	47.5937	0.105949	30	0	1.48348e-05	0.721383	0.00508895	18.1276
2.65	0	0.00607761	0	49.4634	0.5359	47.5937	0.105952	30	0	1.67236e-05	0.749323	0.00573692	20.0341
2.7	0	0.00607894	0	49.4634	0.535902	47.5937	0.105955	30	0	1.8852e-05	0.778346	0.00646739	22.1411
2.75	0	0.00608044	0	49.4634	0.535905	47.5937	0.105958	30	0	2.125e-05	0.808492	0.00729088	24.4697
2.8	0	0.00608213	0	49.4634	0.535908	47.5937	0.105962	30	0	2.39517e-05	0.839806	0.00821921	27.0432
2.85	0	0.00608403	0	49.4634	0.535911	47.5937	0.105966	30	0	2.69953e-05	0.872333	0.00926575	29.8874
2.9	0	0.00608617	0	49.4634	0.535914	47.5936	0.105971	30	0	3.04239e-05	0.906119	0.0104455	33.0307
2.95	0	0.00608859	0	49.4634	0.535918	47.5936	0.105977	29.9999	0	3.42856e-05	0.941214	0.0117755	36.5045
3	0	0.00609131	0	49.4634	0.535923	47.5936	0.105983	29.9999	0	3.86348e-05	0.977669	0.0132749	40.3438
3.05	0	0.00609437	0	49.4634	0.535928	47.5936	0.10599	29.9999	0	4.35324e-05	1.01553	0.0149652	44.5867
3.1	0	0.00609781	0	49.4634	0.535934	47.5936	0.105998	29.9999	0	4.90467e-05	1.05487	0.0168707	49.276
3.15	0	0.00610169	0	49.4634	0.535941	47.5936	0.106006	29.9999	0	5.52545e-05	1.09572	0.0190188	54.4584
3.2	0	0.00610606	0	49.4634	0.535948	47.5936	0.106016	29.9999	0	6.22418e-05	1.13816	0.0214404	60.1858
3.25	0	0.00611098	0	49.4634	0.535956	47.5936	0.106027	29.9999	0	7.01049e-05	1.18225	0.0241704	66.5156
3.3	0	0.0061165	0	49.4634	0.535965	47.5936	0.10604	29.9999	0	7.89517e-05	1.22804	0.0272479	73.5112
3.35	0	0.00612272	0	49.4633	0.535976	47.5936	0.106054	29.9999	0	8.89027e-05	1.2756	0.0307174	81.2424
3.4	0	0.00612972	0	49.4633	0.535988	47.5936	0.10607	29.9998	0	0.000100093	1.325	0.0346285	89.7868
3.45	0	0.00613758	0	49.4633	0.536001	47.5936	0.106088	29.9998	0	0.000112672	1.37632	0.0390377	99.2297
3.5	0	0.00614642	0	49.4633	0.536016	47.5936	0.106108	29.9998	0	0.000126809	1.42963	0.0440083	109.666
3.55	0	0.00615634	0	49.4633	0.536033	47.5936	0.10613	29.9998	0	0.000142689	1.485	0.0496118	121.199
3.6	0	0.00616748	0	49.4633	0.536051	47.5935	0.106155	29.9998	0	0.00016052	1.54252	0.0559288	133.946
3.65	0	0.00617999	0	49.4632	0.536072	47.5935	0.106184	29.9997	0	0.000180533	1.60226	0.0630501	148.033
3.7	0	0.00619402	0	49.4632	0.536096	47.5935	0.106215	29.9997	0	0.000202982	1.66432	0.0710781	163.602
3.75	0	0.00620975	0	49.4632	0.536123	47.5935	0.106251	29.9996	0	0.000228148	1.72878	0.0801283	180.808
3.8	0	0.00622737	0	49.4632	0.536152	47.5935	0.106291	29.9996	0	0.000256343	1.79574	0.0903309	199.824
3.85	0	0.0062471	0	49.4631	0.536185	47.5934	0.106336	29.9996	0	0.000287908	1.86529	0.101833	220.84
3.9	0	0.00626917	0	49.4631	0.536223	47.5934	0.106386	29.9995	0	0.000323217	1.93753	0.114799	244.066
3.95	0	0.00629383	0	49.463	0.536264	47.5934	0.106441	29.9994	0	0.000362679	2.01258	0.129416	269.735
4	0	0.00632137	0	49.463	0.53631	47.5933	0.106504	29.9994	0	0.00040674	2.09053	0.145894	298.103
4.05	0	0.00635209	0	49.4629	0.536362	47.5933	0.106573	29.9993	0	0.000455884	2.17149	0.16447	329.455
4.1	0	0.00638631	0	49.4629	0.53642	47.5933	0.106651	29.9992	0	0.000510633	2.2556	0.185412	364.104
4.15	0	0.00642438	0	49.4628	0.536484	47.5932	0.106737	29.9991	0	0.000571549	2.34296	0.20902	402.397
4.2	0	0.00646668	0	49.4627	0.536555	47.5932	0.106833	29.999	0	0.000639232	2.43371	0.235634	444.717
4.25	0	0.00651361	0	49.4627	0.536634	47.5931	0.106939	29.9989	0	0.000714323	2.52797	0.265637	491.489
4.3	0	0.0065656	0	49.4626	0.536722	47.593	0.107057	29.9988	0	0.000797498	2.62588	0.29946	543.179
4.35	0	0.00662308	0	49.4625	0.536819	47.593	0.107187	29.9986	0	0.000889469	2.72758	0.33759	600.306
4.4	0	0.00668652	0	49.4624	0.536925	47.5929	0.10733	29.9985	0	0.00099098	2.83322	0.380574	663.44
4.45	0	0.00675641	0	49.4622	0.537043	47.5928	0.107489	29.9983	0	0.0011028	2.94296	0.429032	733.215
4.5	0	0.00683324	0	49.4621	0.537172	47.5927	0.107663	29.9981	0	0.00122573	3.05694	0.48366	810.328
4.55	0	0.00691752	0	49.462	0.537314	47.5926	0.107853	29.9979	0	0.00136057	3.17534	0.545243	895.551
4.6	0	0.00700976	0	49.4618	0.53747	47.5925	0.108062	29.9977	0	0.00150816	3.29833	0.614668	989.737
4.65	0	0.00711048	0	49.4616	0.537639	47.5923	0.10829	29.9974	0	0.00166931	3.42608	0.692932	1093.83
4.7	0	0.00722019	0	49.4614	0.537824	47.5922	0.108539	29.9971	0	0.00184485	3.55877	0.781162	1208.87
4.75	0	0.00733941	0	49.4612	0.538025	47.592	0.108809	29.9968	0	0.00203561	3.69661	0.880626	1336.01
4.8	0	0.00746865	0	49.461	0.538243	47.5919	0.109101	29.9965	0	0.00224238	3.83978	0.992754	1476.51
4.85	0	0.00760838	0	49.4608	0.538478	47.5917	0.109418	29.9962	0	0.00246595	3.9885	1.11916	1631.8
4.9	0	0.00775909	0	49.4605	0.538732	47.5915	0.109759	29.9958	0	0.00270708	4.14298	1.26166	1803.42
4.95	0	0.00792122	0	49.4602	0.539005	47.5913	0.110126	29.9954	0	0.0029665	4.30344	1.4223	1993.09
5	0	0.00809524	0	49.4599	0.539298	47.591	0.11052	29.995	0	0.00324492	4.47012	1.6034	2202.7
5.05	0	0.00828154	0	49.4596	0.539611	47.5908	0.110942	29.9945	0	0.00354301	4.64325	1.80756	2434.36
5.1	0	0.00848054	0	49.4592	0.539947	47.5905	0.111392	29.994	0	0.00386141	4.82309	2.03771	2690.39
5.15	0	0.00869262	0	49.4589	0.540304	47.5903	0.111872	29.9935	0	0.00420074	5.0099	2.29717	2973.34
5.2	0	0.00891816	0	49.4585	0.540683	47.59	0.112383	29.9929	0	0.0045616	5.20394	2.58967	3286.05
5.25	0	0.0091575	0	49.4581	0.541087	47.5897	0.112925	29.9923	0	0.00494455	5.40549	2.9194	3631.64
5.3	0	0.009411	0	49.4576	0.541513	47.5893	0.113499	29.9917	0	0.00535015	5.61485	3.29112	4013.59
5.35	0	0.009679	0	49.4572	0.541965	47.589	0.114105	29.991	0	0.00577895	5.83232	3.71018	4435.7
5.4	0	0.00996184	0	49.4567	0.542441	47.5886	0.114746	29.9903	0	0.00623148	6.05822	4.18259	4902.21
5.45	0	0.0102598	0	49.4561	0.542943	47.5882	0.11542	29.9896	0	0.0067083	6.29286	4.71515	5417.78
5.5	0	0.0105734	0	49.4556	0.543471	47.5878	0.11613	29.9888	0	0.00720993	6.53659	5.31552	5987.57
5.55	0	0.0109028	0	49.455	0.544026	47.5874	0.116876	29.988	0	0.00773695	6.78976	5.99233	6617.29
5.6	0	0.0112484	0	49.4544	0.544608	47.587	0.117658	29.9871	0	0.00828992	7.05274	6.75532	7313.24
5.65	0	0.0116106	0	49.4538	0.545217	47.5865	0.118478	29.9862	0	0.00886943	7.3259	7.61546	8082.38
5.7	0	0.0119897	0	49.4531	0.545856	47.586	0.119337	29.9853	0	0.00947612	7.60964	8.58512	8932.41
5.75	0	0.0123863	0	49.4524	0.546524	47.5855	0.120235	29.9843	0	0.0101106	7.90437	9.67825	9871.84
5.8	0	0.0128007	0	49.4517	0.547222	47.585	0.121173	29.9833	0	0.0107736	8.21051	10.9106	10910.1
5.85	0	0.0132333	0	49.451	0.54795	47.5844	0.122152	29.9822	0	0.0114658	8.52852	12.2998	12057.5
5.9	0	0.0136847	0	49.4502	0.54871	47.5838	0.123174	29.9811	0	0.012188	8.85884	13.8659	13325.6
5.95	0	0.0141552	0	49.4494	0.549503	47.5832	0.12424	29.9799	0	0.0129409	9.20195	15.6314	14727.1
6	0	0.0146456	0	49.4485	0.550328	47.5826	0.12535	29.9787	0	0.0137255	9.55835	17.6217	16275.9
6.05	0	0.0151562	0	49.4476	0.551188	47.5819	0.126506	29.9774	0	0.0145425	9.92856	19.8654	17987.7
6.1	0	0.0156877	0	49.4467	0.552083	47.5812	0.127709	29.9761	0	0.0153929	10.3131	22.3949	19879.5
6.15	0	0.0162408	0	49.4457	0.553015	47.5805	0.128961	29.9747	0	0.0162778	10.7125	25.2464	21970.2
6.2	0	0.0168159	0	49.4447	0.553983	47.5798	0.130263	29.9733	0	0.017198	11.1275	28.4609	24280.8
6.25	0	0.0174139	0	49.4437	0.55499	47.579	0.131617	29.9718	0	0.0181548	11.5584	32.0848	26834.5
6.3	0	0.0180354	0	49.4426	0.556037	47.5782	0.133024	29.9703	0	0.0191492	12.0061	36.1701	29656.7
6.35	0	0.0186812	0	49.4415	0.557124	47.5773	0.134486	29.9687	0	0.0201825	12.4711	40.7756	32775.7
6.4	0	0.0193521	0	49.4403	0.558254	47.5765	0.136005	29.967	0	0.0212559	12.9541	45.9674	36222.7
6.45	0	0.0200488	0	49.4391	0.559427	47.5756	0.137583	29.9653	0	0.0223706	13.4559	51.8204	40032.3
6.5	0	0.0207722	0	49.4379	0.560646	47.5746	0.13922	29.9635	0	0.0235281	13.977	58.4185	44242.6
6.55	0	0.0215233	0	49.4365	0.56191	47.5737	0.140921	29.9616	0	0.0247298	14.5184	65.8569	48895.6
6.6	0	0.0223028	0	49.4352	0.563223	47.5727	0.142686	29.9597	0	0.0259771	15.0807	74.2423	54038
6.65	0	0.0231119	0	49.4338	0.564586	47.5716	0.144518	29.9576	0	0.0272716	15.6648	83.6954	59721.2
6.7	0	0.0239515	0	49.4323	0.566	47.5705	0.146418	29.9556	0	0.028615	16.2715	94.3522	66002.2
6.75	0	0.0248227	0	49.4308	0.567467	47.5694	0.148391	29.9534	0	0.0300089	16.9017	106.366	72943.7
6.8	0	0.0257266	0	49.4292	0.568989	47.5682	0.150437	29.9511	0	0.031455	17.5563	119.909	80615.2
6.85	0	0.0266642	0	49.4276	0.570568	47.567	0.15256	29.9488	0	0.0329553	18.2363	135.177	89093.6
6.9	0	0.0276368	0	49.4259	0.572206	47.5658	0.154762	29.9464	0	0.0345115	18.9426	152.389	98463.7
6.95	0	0.0286457	0	49.4242	0.573905	47.5645	0.157046	29.9439	0	0.0361256	19.6763	171.792	100002
7	0	0.029692	0	49.4223	0.575667	47.5631	0.159415	29.9413	0	0.0377998	20.4384	193.666	100001
7.05	0	0.0307772	0	49.4204	0.577494	47.5617	0.161872	29.9386	0	0.039536	21.23	218.326	100001
7.1	0	0.0319025	0	49.4185	0.579389	47.5602	0.164419	29.9358	0	0.0413366	22.0523	246.125	100001
7.15	0	0.0330695	0	49.4165	0.581354	47.5587	0.167062	29.9329	0	0.0432038	22.9064	277.466	100001
7.2	0	0.0342797	0	49.4143	0.583392	47.5572	0.169801	29.9299	0	0.04514	23.7936	312.796	100001
7.25	0	0.0355345	0	49.4122	0.585505	47.5555	0.172642	29.9268	0	0.0471477	24.7151	352.624	100001
7.3	0	0.0368356	0	49.4099	0.587696	47.5539	0.175588	29.9235	0	0.0492294	25.6724	397.523	100001
7.35	0	0.0381846	0	49.4076	0.589968	47.5521	0.178642	29.9202	0	0.0513879	26.6667	448.139	100001
7.4	0	0.0395833	0	49.4051	0.592323	47.5503	0.181809	29.9167	0	0.0536258	27.6995	505.2	100001
7.45	0	0.0410334	0	49.4026	0.594766	47.5484	0.185092	29.9131	0	0.0559459	28.7724	569.527	100001
7.5	0	0.0425368	0	49.4	0.597297	47.5465	0.188495	29.9094	0	0.0583514	29.8868	642.045	100001
7.55	0	0.0440955	0	49.3973	0.599922	47.5445	0.192024	29.9055	0	0.0608453	31.0443	723.797	100001
7.6	0	0.0457113	0	49.3945	0.602643	47.5424	0.195683	29.9015	0	0.0634307	32.2467	815.958	100001
7.65	0	0.0473865	0	49.3915	0.605464	47.5402	0.199475	29.8973	0	0.0661109	33.4957	919.852	100001
7.7	0	0.0491231	0	49.3885	0.608389	47.538	0.203407	29.893	0	0.0688894	34.793	1036.97	100001
7.75	0	0.0509233	0	49.3854	0.61142	47.5356	0.207482	29.8885	0	0.0717698	36.1406	1169.01	100001
7.8	0	0.0527895	0	49.3821	0.614563	47.5332	0.211707	29.8839	0	0.0747557	37.5403	1317.86	100001
7.85	0	0.054724	0	49.3788	0.61782	47.5307	0.216087	29.8791	0	0.0778509	38.9943	1485.66	100001
7.9	0	0.0567293	0	49.3753	0.621197	47.5281	0.220627	29.8741	0	0.0810594	40.5046	1674.82	100001
7.95	0	0.0588079	0	49.3717	0.624698	47.5254	0.225333	29.8689	0	0.0843852	42.0734	1888.08	100001
8	0	0.0609626	0	49.3679	0.628326	47.5227	0.230211	29.8636	0	0.0878327	43.703	2128.48	100001
8.05	0	0.063196	0	49.364	0.632087	47.5198	0.235268	29.858	0	0.0914061	45.3956	2399.5	100001
8.1	0	0.065511	0	49.36	0.635986	47.5168	0.240509	29.8523	0	0.0951102	47.1539	2705.02	100001
8.15	0	0.0679106	0	49.3558	0.640027	47.5137	0.245942	29.8463	0	0.0989495	48.9802	3049.44	100001
8.2	0	0.0703977	0	49.3515	0.644215	47.5105	0.251573	29.8401	0	0.102929	50.8772	3437.72	100001
8.25	0	0.0729756	0	49.347	0.648556	47.5071	0.257409	29.8337	0	0.107054	52.8478	3875.44	100001
8.3	0	0.0756476	0	49.3424	0.653056	47.5037	0.263458	29.8271	0	0.111329	54.8946	4368.89	100001
8.35	0	0.0784169	0	49.3375	0.657719	47.5001	0.269728	29.8202	0	0.11576	57.0208	4925.17	100001
8.4	0	0.0812872	0	49.3325	0.662553	47.4964	0.276226	29.8131	0	0.120352	59.2293	5552.28	100001
8.45	0	0.0842621	0	49.3274	0.667563	47.4925	0.282961	29.8057	0	0.125112	61.5233	6259.25	100001
8.5	0	0.0873452	0	49.322	0.672755	47.4885	0.289942	29.798	0	0.130045	63.9062	7056.22	100001
8.55	0	0.0905406	0	49.3164	0.678136	47.4844	0.297176	29.7901	0	0.135157	66.3813	7954.68	100001
8.6	0	0.0938522	0	49.3107	0.683712	47.4801	0.304674	29.7819	0	0.140456	68.9524	8967.53	100001
8.65	0	0.0972843	0	49.3047	0.689492	47.4757	0.312444	29.7733	0	0.145947	71.623	10109.3	100001
8.7	0	0.100841	0	49.2985	0.695482	47.4711	0.320496	29.7645	0	0.151638	74.397	11396.5	100001
8.75	0	0.104527	0	49.2921	0.701689	47.4663	0.328841	29.7553	0	0.157536	77.2785	12847.6	100001
8.8	0	0.108347	0	49.2854	0.708121	47.4614	0.337489	29.7458	0	0.163647	80.2716	14483.5	100001
8.85	0	0.112305	0	49.2786	0.714787	47.4563	0.346451	29.736	0	0.169981	83.3806	16327.7	100001
8.9	0	0.116407	0	49.2714	0.721695	47.451	0.355738	29.7258	0	0.176544	86.61	18406.6	100001
8.95	0	0.120658	0	49.264	0.728853	47.4455	0.365362	29.7152	0	0.183345	89.9646	20750.3	100001
9	0	0.125063	0	49.2564	0.736271	47.4398	0.375334	29.7043	0	0.190393	93.449	23392.4	100001
9.05	0	0.129627	0	49.2484	0.743957	47.4339	0.385667	29.693	0	0.197695	97.0684	26370.9	100001
9.1	0	0.134356	0	49.2402	0.751921	47.4278	0.396374	29.6812	0	0.205262	100.828	29728.7	100001
9.15	0	0.139256	0	49.2317	0.760173	47.4214	0.407469	29.669	0	0.213103	104.733	33514	100001
9.2	0	0.144334	0	49.2228	0.768723	47.4149	0.418964	29.6564	0	0.221227	108.79	37781.2	100001
9.25	0	0.149594	0	49.2137	0.777582	47.4081	0.430874	29.6433	0	0.229644	113.003	42591.8	100001
9.3	0	0.155045	0	49.2042	0.786761	47.401	0.443214	29.6298	0	0.238365	117.38	48014.9	100001
9.35	0	0.160692	0	49.1943	0.796271	47.3937	0.455999	29.6158	0	0.2474	121.926	54128.6	100001
9.4	0	0.166543	0	49.1842	0.806124	47.3862	0.469245	29.6012	0	0.256761	126.649	61020.7	100001
9.45	0	0.172604	0	49.1736	0.816331	47.3784	0.482968	29.5862	0	0.266459	131.554	68790.3	100001
9.5	0	0.178884	0	49.1627	0.826905	47.3702	0.497184	29.5706	0	0.276506	136.649	77549.2	100001
9.55	0	0.185389	0	49.1514	0.83786	47.3618	0.511912	29.5544	0	0.286914	141.942	87423.4	100001
9.6	0	0.192127	0	49.1396	0.849208	47.3531	0.527168	29.5376	0	0.297696	147.439	98554.9	100001
9.65	0	0.199108	0	49.1275	0.860963	47.3441	0.542972	29.5203	0	0.308865	153.15	100000	100001
9.7	0	0.206339	0	49.1149	0.87314	47.3348	0.559343	29.5023	0	0.320434	159.082	100000	100001
9.75	0	0.213828	0	49.1019	0.885752	47.3251	0.5763	29.4837	0	0.332418	165.243	100000	100001
9.8	0	0.221586	0	49.0884	0.898816	47.3151	0.593863	29.4644	0	0.34483	171.643	100000	100001
9.85	0	0.229621	0	49.0744	0.912347	47.3047	0.612054	29.4445	0	0.357686	178.291	100000	100001
9.9	0	0.237943	0	49.0599	0.926361	47.294	0.630895	29.4238	0	0.371001	185.197	100000	100001
9.95	0	0.246562	0	49.0449	0.940875	47.2829	0.650408	29.4024	0	0.384792	192.371	100000	100001
10	0	0.255487	0	49.0293	0.955906	47.2713	0.670616	29.3802	0	0.399073	199.822	100000	100001
10.05	0	0.264731	0	49.0133	0.971472	47.2594	0.691542	29.3572	0	0.413861	207.561	100000	100001
10.1	0	0.274302	0	48.9966	0.98759	47.2471	0.713212	29.3334	0	0.429176	215.6	100000	100001
10.15	0	0.284213	0	48.9793	1.00428	47.2343	0.735651	29.3088	0	0.445033	223.951	100000	100001
10.2	0	0.294476	0	48.9615	1.02156	47.221	0.758885	29.2833	0	0.461454	232.626	100000	100001
10.25	0	0.305101	0	48.943	1.03946	47.2073	0.782941	29.2569	0	0.478455	241.636	100000	100001
10.3	0	0.316102	0	48.9238	1.05798	47.1931	0.807848	29.2296	0	0.496056	250.995	100000	100001
10.35	0	0.327491	0	48.904	1.07716	47.1785	0.833632	29.2013	0	0.514279	260.716	100000	100001
10.4	0	0.339281	0	48.8835	1.09702	47.1633	0.860325	29.172	0	0.533143	270.814	100000	100001
10.45	0	0.351486	0	48.8622	1.11757	47.1475	0.887956	29.1416	0	0.55267	281.303	100000	100001
10.5	0	0.364119	0	48.8402	1.13884	47.1312	0.916558	29.1102	0	0.572883	292.198	100000	100001
10.55	0	0.377195	0	48.8175	1.16086	47.1144	0.946162	29.0777	0	0.593805	303.516	100000	100001
10.6	0	0.390729	0	48.7939	1.18365	47.0969	0.976802	29.0441	0	0.615458	315.271	100000	100001
10.65	0	0.404735	0	48.7695	1.20724	47.0789	1.00851	29.0093	0	0.637868	327.482	100000	100001
10.7	0	0.419229	0	48.7443	1.23165	47.0602	1.04133	28.9733	0	0.661059	340.166	100000	100001
10.75	0	0.434227	0	48.7182	1.2569	47.0409	1.07528	28.936	0	0.685056	353.341	100000	100001
10.8	0	0.449746	0	48.6911	1.28304	47.0209	1.11042	28.8975	0	0.709886	367.027	100000	100001
10.85	0	0.465802	0	48.6632	1.31008	47.0003	1.14677	28.8576	0	0.735576	381.242	100000	100001
10.9	0	0.482413	0	48.6343	1.33805	46.9789	1.18438	28.8163	0	0.762153	396.008	100000	100001
10.95	0	0.499597	0	48.6043	1.36699	46.9568	1.22328	28.7736	0	0.789647	411.346	100000	100001
11	0	0.517371	0	48.5734	1.39692	46.9339	1.26352	28.7294	0	0.818086	427.278	100000	100001
11.05	0	0.535755	0	48.5414	1.42788	46.9102	1.30514	28.6837	0	0.847501	443.827	100000	100001
11.1	0	0.554768	0	48.5083	1.45989	46.8858	1.34819	28.6365	0	0.877922	461.017	100000	100001
11.15	0	0.57443	0	48.474	1.49301	46.8605	1.3927	28.5876	0	0.90938	478.873	100000	100001
11.2	0	0.59476	0	48.4386	1.52724	46.8343	1.43873	28.5371	0	0.941909	497.42	100000	100001
11.25	0	0.615781	0	48.402	1.56264	46.8073	1.48632	28.4849	0	0.975541	516.686	100000	100001
11.3	0	0.637512	0	48.3642	1.59923	46.7794	1.53552	28.4309	0	1.01031	536.698	100000	100001
11.35	0	0.659975	0	48.325	1.63706	46.7505	1.58638	28.375	0	1.04625	557.485	100000	100001
11.4	0	0.683193	0	48.2846	1.67616	46.7207	1.63894	28.3173	0	1.0834	579.077	100000	100001
11.45	0	0.707189	0	48.2428	1.71657	46.6899	1.69327	28.2577	0	1.12179	601.505	100000	100001
11.5	0	0.731985	0	48.1996	1.75833	46.6581	1.74941	28.1961	0	1.16147	624.803	100000	100001
11.55	0	0.757606	0	48.155	1.80147	46.6252	1.80741	28.1324	0	1.20246	649.002	100000	100001
11.6	0	0.784074	0	48.1089	1.84605	46.5912	1.86734	28.0667	0	1.24481	674.139	100000	100001
11.65	0	0.811416	0	48.0612	1.89209	46.5562	1.92924	27.9987	0	1.28856	700.25	100000	100001
11.7	0	0.839656	0	48.012	1.93965	46.52	1.99317	27.9285	0	1.33374	727.371	100000	100001
11.75	0	0.86882	0	47.9612	1.98876	46.4826	2.0592	27.8561	0	1.3804	755.544	100000	100001
11.8	0	0.898933	0	47.9088	2.03947	46.444	2.12738	27.7812	0	1.42858	784.807	100000	100001
11.85	0	0.930022	0	47.8546	2.09182	46.4042	2.19776	27.704	0	1.47833	815.204	100000	100001
11.9	0	0.962113	0	47.7987	2.14586	46.3631	2.27042	27.6242	0	1.52967	846.778	100000	100001
11.95	0	0.995235	0	47.741	2.20164	46.3207	2.3454	27.5419	0	1.58267	879.575	100000	100001
12	0	1.02941	0	47.6814	2.2592	46.277	2.42279	27.457	0	1.63735	913.643	100000	100001
12.05	0	1.06468	0	47.6199	2.31858	46.2319	2.50262	27.3694	0	1.69378	949.029	100000	100001
12.1	0	1.10106	0	47.5565	2.37984	46.1853	2.58498	27.279	0	1.75198	985.787	100000	100001
12.15	0	1.13858	0	47.4911	2.44303	46.1374	2.66993	27.1857	0	1.81201	1023.97	100000	100001
12.2	0	1.17727	0	47.4237	2.50818	46.088	2.75752	27.0896	0	1.87392	1063.63	100000	100001
12.25	0	1.21716	0	47.3542	2.57536	46.0371	2.84783	26.9904	0	1.93774	1104.82	100000	100001
12.3	0	1.25828	0	47.2825	2.6446	45.9846	2.94093	26.8883	0	2.00353	1147.61	100000	100001
12.35	0	1.30065	0	47.2086	2.71596	45.9305	3.03687	26.783	0	2.07134	1192.06	100000	100001
12.4	0	1.34432	0	47.1325	2.78949	45.8749	3.13572	26.6745	0	2.1412	1238.23	100000	100001
12.45	0	1.3893	0	47.0541	2.86524	45.8175	3.23756	26.5627	0	2.21317	1286.19	100000	100001
12.5	0	1.43562	0	46.9733	2.94325	45.7586	3.34244	26.4476	0	2.28729	1336.01	100000	100001
12.55	0	1.48332	0	46.8901	3.02358	45.6978	3.45044	26.329	0	2.36361	1387.75	100000	100001
12.6	0	1.53243	0	46.8045	3.10628	45.6354	3.56161	26.207	0	2.44218	1441.5	100000	100001
12.65	0	1.58297	0	46.7163	3.19138	45.5711	3.67603	26.0814	0	2.52304	1497.34	100000	100001
12.7	0	1.63497	0	46.6257	3.27895	45.505	3.79376	25.9522	0	2.60624	1555.33	100000	100001
12.75	0	1.68846	0	46.5324	3.36903	45.4371	3.91486	25.8193	0	2.69182	1615.57	100000	100001
12.8	0	1.74346	0	46.4364	3.46166	45.3673	4.03939	25.6826	0	2.77983	1678.14	100000	100001
12.85	0	1.80001	0	46.3377	3.55689	45.2956	4.16743	25.542	0	2.87032	1743.14	100000	100001
12.9	0	1.85814	0	46.2363	3.65477	45.2219	4.29901	25.3976	0	2.96331	1810.66	100000	100001
12.95	0	1.91786	0	46.1321	3.75534	45.1463	4.43422	25.2492	0	3.05886	1880.78	100000	100001
13	0	1.9792	0	46.0251	3.85864	45.0687	4.5731	25.0968	0	3.15701	1953.63	100000	100001
13.05	0	2.04219	0	45.9152	3.96471	44.989	4.7157	24.9402	0	3.25779	2029.3	100000	100001
13.1	0	2.10684	0	45.8023	4.07359	44.9073	4.86208	24.7796	0	3.36124	2107.9	100000	100001
13.15	0	2.17319	0	45.6865	4.18532	44.8235	5.01229	24.6147	0	3.4674	2189.54	100000	100001
13.2	0	2.24125	0	45.5677	4.29993	44.7377	5.16638	24.4456	0	3.57629	2274.34	100000	100001
13.25	0	2.31104	0	45.4459	4.41746	44.6497	5.32439	24.2721	0	3.68796	2362.43	100000	100001
13.3	0	2.38258	0	45.3209	4.53793	44.5596	5.48635	24.0944	0	3.80242	2453.93	100000	100001
13.35	0	2.45588	0	45.1929	4.66137	44.4674	5.65231	23.9122	0	3.9197	2548.97	100000	100001
13.4	0	2.53096	0	45.0618	4.78781	44.373	5.82229	23.7256	0	4.03983	2647.7	100000	100001
13.45	0	2.60784	0	44.9275	4.91726	44.2764	5.99633	23.5346	0	4.16283	2750.25	100000	100001
13.5	0	2.68651	0	44.7901	5.04975	44.1777	6.17445	23.3391	0	4.28871	2856.77	100000	100001
13.55	0	2.76699	0	44.6495	5.18528	44.0767	6.35667	23.1391	0	4.41748	2967.42	100000	100001
13.6	0	2.84929	0	44.5057	5.32387	43.9737	6.54299	22.9346	0	4.54916	3082.35	100000	100001
13.65	0	2.93341	0	44.3587	5.46553	43.8684	6.73343	22.7256	0	4.68375	3201.74	100000	100001
13.7	0	3.01935	0	44.2085	5.61024	43.761	6.92799	22.512	0	4.82125	3325.74	100000	100001
13.75	0	3.1071	0	44.0551	5.75802	43.6514	7.12666	22.2939	0	4.96165	3454.55	100000	100001
13.8	0	3.19666	0	43.8986	5.90884	43.5397	7.32943	22.0714	0	5.10495	3588.35	100000	100001
13.85	0	3.28803	0	43.7388	6.06271	43.4259	7.53629	21.8443	0	5.25114	3727.34	100000	100001
13.9	0	3.38119	0	43.5759	6.21959	43.31	7.7472	21.6128	0	5.40019	3871.7	100000	100001
13.95	0	3.47612	0	43.4099	6.37946	43.192	7.96214	21.3769	0	5.55209	4021.66	100000	100001
14	0	3.57282	0	43.2408	6.54229	43.0719	8.18105	21.1366	0	5.7068	4177.42	100000	100001
14.05	0	3.67125	0	43.0686	6.70805	42.9499	8.40391	20.892	0	5.8643	4339.22	100000	100001
14.1	0	3.7714	0	42.8933	6.8767	42.8258	8.63064	20.6432	0	6.02453	4507.29	100000	100001
14.15	0	3.87323	0	42.7152	7.04818	42.6999	8.86117	20.3901	0	6.18745	4681.86	100000	100001
14.2	0	3.9767	0	42.534	7.22243	42.5721	9.09545	20.133	0	6.35302	4863.2	100000	100001
14.25	0	4.0818	0	42.3501	7.39941	42.4424	9.33338	19.8718	0	6.52117	5051.56	100000	100001
14.3	0	4.18846	0	42.1633	7.57903	42.311	9.57487	19.6068	0	6.69183	5247.21	100000	100001
14.35	0	4.29665	0	41.9739	7.76123	42.1779	9.81981	19.3379	0	6.86494	5450.44	100000	100001
14.4	0	4.40632	0	41.7818	7.94592	42.0432	10.0681	19.0654	0	7.04041	5661.55	100000	100001
14.45	0	4.51742	0	41.5872	8.133	41.9069	10.3196	18.7893	0	7.21817	5880.83	100000	100001
14.5	0	4.62989	0	41.3902	8.3224	41.7691	10.5743	18.5098	0	7.39811	6108.6	100000	100001
14.55	0	4.74366	0	41.1908	8.51399	41.6299	10.8318	18.2271	0	7.58015	6345.19	100000	100001
14.6	0	4.85868	0	40.9892	8.70768	41.4894	11.0922	17.9413	0	7.76418	6590.95	100000	100001
14.65	0	4.97487	0	40.7856	8.90335	41.3477	11.3553	17.6525	0	7.95009	6846.23	100000	100001
14.7	0	5.09216	0	40.5799	9.10087	41.2049	11.6209	17.361	0	8.13776	7111.4	100000	100001
14.75	0	5.21048	0	40.3725	9.30012	41.061	11.8887	17.067	0	8.32707	7386.83	100000	100001
14.8	0	5.32975	0	40.1633	9.50096	40.9163	12.1587	16.7707	0	8.51789	7672.93	100000	100001
14.85	0	5.44987	0	39.9526	9.70324	40.7707	12.4307	16.4722	0	8.71008	7970.12	100000	100001
14.9	0	5.57077	0	39.7404	9.90683	40.6244	12.7044	16.1717	0	8.90352	8278.81	100000	100001
14.95	0	5.69235	0	39.5271	10.1116	40.4775	12.9797	15.8696	0	9.09805	8599.46	100000	100001
15	0	5.81452	0	39.3127	10.3173	40.3301	13.2563	15.566	0	9.29353	8932.53	100000	100001
15.05	0	5.93719	0	39.0973	10.5239	40.1824	13.534	15.2612	0	9.48979	9278.5	100000	100001
15.1	0	6.06026	0	38.8812	10.7311	40.0345	13.8126	14.9553	0	9.6867	9637.88	100000	100001
15.15	0	6.18362	0	38.6646	10.9389	39.8864	14.0919	14.6488	0	9.88409	10011.2	100000	100001
15.2	0	6.30718	0	38.4475	11.147	39.7383	14.3717	14.3417	0	10.0818	10398.9	100000	100001
15.25	0	6.43084	0	38.2303	11.3552	39.5904	14.6516	14.0344	0	10.2796	10801.7	100000	100001
15.3	0	6.55448	0	38.013	11.5634	39.4428	14.9315	13.7272	0	10.4775	11220	100000	100001
15.35	0	6.67801	0	37.7959	11.7714	39.2955	15.2112	13.4202	0	10.6751	11654.6	100000	100001
15.4	0	6.80132	0	37.5791	11.9791	39.1488	15.4904	13.1138	0	10.8724	12106	100000	100001
15.45	0	6.9243	0	37.3629	12.1862	39.0027	15.7688	12.8082	0	11.0692	12574.9	100000	100001
15.5	0	7.04685	0	37.1473	12.3926	38.8574	16.0463	12.5037	0	11.2652	13061.9	100000	100001
15.55	0	7.16886	0	36.9327	12.598	38.7129	16.3225	12.2005	0	11.4605	13567.9	100000	100001
15.6	0	7.29023	0	36.7192	12.8024	38.5695	16.5973	11.8989	0	11.6547	14093.4	100000	100001
15.65	0	7.41086	0	36.5069	13.0056	38.4271	16.8704	11.5991	0	11.8477	14639.2	100000	100001
15.7	0	7.53065	0	36.2961	13.2073	38.286	17.1416	11.3014	0	12.0393	15206.2	100000	100001
15.75	0	7.6495	0	36.0869	13.4074	38.1463	17.4107	11.0061	0	12.2295	15795.2	100000	100001
15.8	0	7.76731	0	35.8794	13.6058	38.008	17.6774	10.7133	0	12.418	16406.9	100000	100001
15.85	0	7.88399	0	35.6739	13.8023	37.8712	17.9415	10.4234	0	12.6047	17042.4	100000	100001
15.9	0	7.99945	0	35.4706	13.9967	37.7362	18.203	10.1364	0	12.7894	17702.5	100000	100001
15.95	0	8.11361	0	35.2695	14.189	37.6028	18.4614	9.85276	0	12.9721	18388.1	100000	100001
16	0	8.22638	0	35.0708	14.3789	37.4713	18.7167	9.57253	0	13.1525	19100.3	100000	100001
16.05	0	8.33768	0	34.8746	14.5663	37.3417	18.9687	9.29595	0	13.3306	19840.1	100000	100001
16.1	0	8.44744	0	34.6811	14.7511	37.2142	19.2172	9.0232	0	13.5062	20608.6	100000	100001
16.15	0	8.55558	0	34.4905	14.9333	37.0887	19.462	8.75446	0	13.6792	21406.8	100000	100001
16.2	0	8.66205	0	34.3027	15.1126	36.9653	19.7031	8.48989	0	13.8496	22235.9	100000	100001
16.25	0	8.76677	0	34.118	15.2889	36.8442	19.9402	8.22965	0	14.0171	23097.1	100000	100001
16.3	0	8.8697	0	33.9365	15.4622	36.7253	20.1732	7.97388	0	14.1818	23991.7	100000	100001
16.35	0	8.97078	0	33.7581	15.6325	36.6087	20.402	7.7227	0	14.3435	24920.9	100000	100001
16.4	0	9.06996	0	33.5831	15.7995	36.4945	20.6266	7.47623	0	14.5022	25886.1	100000	100001
16.45	0	9.1672	0	33.4115	15.9632	36.3827	20.8467	7.23458	0	14.6578	26888.7	100000	100001
16.5	0	9.26247	0	33.2434	16.1237	36.2733	21.0624	6.99784	0	14.8102	27930.2	100000	100001
16.55	0	9.35573	0	33.0787	16.2807	36.1664	21.2736	6.76608	0	14.9595	29012	100000	100001
16.6	0	9.44696	0	32.9176	16.4343	36.0619	21.4801	6.53939	0	15.1054	30135.6	100000	100001
16.65	0	9.53612	0	32.7602	16.5845	35.9599	21.682	6.31781	0	15.2481	31302.8	100000	100001
16.7	0	9.62322	0	32.6063	16.7312	35.8605	21.8792	6.10138	0	15.3874	32515.3	100000	100001
16.75	0	9.70822	0	32.4562	16.8743	35.7636	22.0716	5.89015	0	15.5234	33774.6	100000	100001
16.8	0	9.79113	0	32.3097	17.0139	35.6691	22.2593	5.68413	0	15.6561	35082.8	100000	100001
16.85	0	9.87193	0	32.1669	17.15	35.5772	22.4422	5.48333	0	15.7854	36441.6	100000	100001
16.9	0	9.95063	0	32.0279	17.2825	35.4878	22.6204	5.28777	0	15.9113	37853	100000	100001
16.95	0	10.0272	0	31.8925	17.4115	35.4009	22.7938	5.09741	0	16.0339	39319.1	100000	100001
17	0	10.1017	0	31.7608	17.537	35.3164	22.9625	4.91226	0	16.1531	40842	100000	100001
17.05	0	10.1742	0	31.6327	17.659	35.2344	23.1265	4.73228	0	16.269	42423.9	100000	100001
17.1	0	10.2445	0	31.5083	17.7774	35.1549	23.2858	4.55743	0	16.3815	44067	100000	100001
17.15	0	10.3128	0	31.3875	17.8925	35.0777	23.4405	4.38768	0	16.4908	45773.8	100000	100001
17.2	0	10.3791	0	31.2703	18.0041	35.0029	23.5905	4.22297	0	16.5969	47546.7	100000	100001
17.25	0	10.4434	0	31.1566	18.1123	34.9305	23.736	4.06325	0	16.6997	49388.2	100000	100001
17.3	0	10.5057	0	31.0464	18.2172	34.8603	23.8771	3.90845	0	16.7994	51301.1	100000	100001
17.35	0	10.566	0	30.9397	18.3189	34.7924	24.0137	3.7585	0	16.8959	53288.1	100000	100001
17.4	0	10.6244	0	30.8363	18.4172	34.7267	24.1459	3.61332	0	16.9894	55352	100000	100001
17.45	0	10.681	0	30.7363	18.5124	34.6633	24.2739	3.47285	0	17.0799	57495.9	100000	100001
17.5	0	10.7356	0	30.6395	18.6045	34.6019	24.3977	3.33699	0	17.1673	59722.8	100000	100001
17.55	0	10.7885	0	30.546	18.6935	34.5427	24.5174	3.20565	0	17.2519	62035.9	100000	100001
17.6	0	10.8396	0	30.4556	18.7795	34.4855	24.633	3.07875	0	17.3336	64438.7	100000	100001
17.65	0	10.8889	0	30.3683	18.8626	34.4302	24.7446	2.95619	0	17.4125	66934.5	100000	100001
17.7	0	10.9365	0	30.284	18.9427	34.377	24.8524	2.83788	0	17.4887	69527	100000	100001
17.75	0	10.9824	0	30.2027	19.0201	34.3257	24.9564	2.72372	0	17.5622	72219.8	100000	100001
17.8	0	11.0268	0	30.1243	19.0947	34.2762	25.0568	2.6136	0	17.6331	75017	100000	100001
17.85	0	11.0695	0	30.0486	19.1667	34.2285	25.1535	2.50743	0	17.7015	77922.6	100000	100001
17.9	0	11.1107	0	29.9757	19.236	34.1826	25.2467	2.40511	0	17.7673	80940.6	100000	100001
17.95	0	11.1503	0	29.9054	19.3028	34.1384	25.3365	2.30652	0	17.8308	84075.6	100000	100001
18	0	11.1885	0	29.8378	19.3671	34.0958	25.423	2.21158	0	17.8919	87331.9	100000	100001
18.05	0	11.2253	0	29.7726	19.4291	34.0549	25.5063	2.12018	0	17.9508	90714.4	100000	100001
18.1	0	11.2607	0	29.7099	19.4887	34.0155	25.5864	2.03221	0	18.0074	94227.9	100000	100001
18.15	0	11.2948	0	29.6496	19.5461	33.9776	25.6635	1.94758	0	18.0619	97877.5	100000	100001
18.2	0	11.3275	0	29.5916	19.6012	33.9412	25.7377	1.86619	0	18.1143	100002	100000	100001
18.25	0	11.359	0	29.5358	19.6542	33.9062	25.809	1.78792	0	18.1647	100002	100000	100001
18.3	0	11.3893	0	29.4821	19.7052	33.8726	25.8775	1.71269	0	18.2132	100002	100000	100001
18.35	0	11.4184	0	29.4306	19.7542	33.8403	25.9434	1.6404	0	18.2597	100002	100000	100001
18.4	0	11.4463	0	29.3811	19.8013	33.8093	26.0067	1.57095	0	18.3044	100002	100000	100001
18.45	0	11.4732	0	29.3335	19.8465	33.7796	26.0675	1.50425	0	18.3474	100002	100000	100001
18.5	0	11.4989	0	29.2879	19.8899	33.751	26.1258	1.4402	0	18.3886	100002	100000	100001
18.55	0	11.5237	0	29.244	19.9316	33.7236	26.1818	1.37871	0	18.4282	100002	100000	100001
18.6	0	11.5474	0	29.2019	19.9715	33.6973	26.2356	1.3197	0	18.4662	100002	100000	100001
18.65	0	11.5702	0	29.1615	20.0099	33.6721	26.2872	1.26308	0	18.5026	100002	100000	100001
18.7	0	11.5921	0	29.1228	20.0467	33.6479	26.3367	1.20876	0	18.5376	100002	100000	100001
18.75	0	11.613	0	29.0856	20.082	33.6247	26.3841	1.15666	0	18.5712	100002	100000	100001
18.8	0	11.6332	0	29.05	20.1159	33.6025	26.4296	1.1067	0	18.6033	100002	100000	100001
18.85	0	11.6524	0	29.0158	20.1484	33.5812	26.4733	1.0588	0	18.6342	100002	100000	100001
18.9	0	11.6709	0	28.9831	20.1795	33.5608	26.5151	1.01288	0	18.6637	100002	100000	100001
18.95	0	11.6886	0	28.9517	20.2093	33.5412	26.5552	0.968864	0	18.6921	100002	100000	100001
19	0	11.7056	0	28.9216	20.2379	33.5225	26.5936	0.926689	0	18.7192	100002	100000	100001
19.05	0	11.7219	0	28.8928	20.2653	33.5045	26.6305	0.88628	0	18.7453	100002	100000	100001
19.1	0	11.7374	0	28.8652	20.2915	33.4873	26.6657	0.847568	0	18.7702	100002	100000	100001
19.15	0	11.7523	0	28.8387	20.3166	33.4708	26.6995	0.810488	0	18.7941	100002	100000	100001
19.2	0	11.7666	0	28.8134	20.3407	33.4551	26.7319	0.774977	0	18.8169	100002	100000	100001
19.25	0	11.7803	0	28.7891	20.3637	33.44	26.7628	0.740972	0	18.8388	100002	100000	100001
19.3	0	11.7934	0	28.7659	20.3858	33.4255	26.7925	0.708414	0	18.8598	100002	100000	100001
19.35	0	11.806	0	28.7437	20.4069	33.4117	26.8209	0.677246	0	18.8798	100002	100000	100001
19.4	0	11.818	0	28.7224	20.4271	33.3985	26.8481	0.647411	0	18.8991	100002	100000	100001
19.45	0	11.8295	0	28.702	20.4465	33.3858	26.8741	0.618856	0	18.9174	100002	100000	100001
19.5	0	11.8405	0	28.6825	20.465	33.3737	26.899	0.591529	0	18.935	100002	100000	100001
19.55	0	11.851	0	28.6638	20.4827	33.3621	26.9228	0.565379	0	18.9519	100002	100000	100001
19.6	0	11.8611	0	28.646	20.4997	33.351	26.9456	0.540359	0	18.968	100002	100000	100001
19.65	0	11.8707	0	28.6289	20.5159	33.3404	26.9674	0.516422	0	18.9834	100002	100000	100001
19.7	0	11.8799	0	28.6126	20.5314	33.3302	26.9883	0.493522	0	18.9981	100002	100000	100001
19.75	0	11.8887	0	28.5969	20.5463	33.3205	27.0082	0.471618	0	19.0122	100002	100000	100001
19.8	0	11.8971	0	28.582	20.5605	33.3113	27.0273	0.450668	0	19.0257	100002	100000	100001
19.85	0	11.9052	0	28.5677	20.574	33.3024	27.0456	0.430631	0	19.0386	100002	100000	100001
19.9	0	11.9129	0	28.554	20.587	33.2939	27.063	0.41147	0	19.051	100002	100000	100001
19.95	0	11.9203	0	28.5409	20.5994	33.2858	27.0797	0.393147	0	19.0628	100002	100000	100001
20	0	11.9273	0	28.5284	20.6113	33.278	27.0957	0.375627	0	19.074	100002	100000	100001
20.05	0	11.9341	0	28.5165	20.6227	33.2706	27.111	0.358877	0	19.0848	100002	100000	100001
20.1	0	11.9405	0	28.5051	20.6335	33.2635	27.1255	0.342862	0	19.0951	100002	100000	100001
20.15	0	11.9467	0	28.4941	20.6439	33.2568	27.1395	0.327553	0	19.105	100002	100000	100001
20.2	0	11.9526	0	28.4837	20.6538	33.2503	27.1528	0.312918	0	19.1144	100002	100000	100001
20.25	0	11.9582	0	28.4737	20.6633	33.2441	27.1656	0.298928	0	19.1234	100002	100000	100001
20.3	0	11.9636	0	28.4642	20.6724	33.2382	27.1778	0.285557	0	19.132	100002	100000	100001
20.35	0	11.9687	0	28.455	20.681	33.2325	27.1894	0.272777	0	19.1403	100002	100000	100001
20.4	0	11.9736	0	28.4463	20.6893	33.2271	27.2005	0.260562	0	19.1481	100002	100000	100001
20.45	0	11.9783	0	28.438	20.6972	33.2219	27.2112	0.248889	0	19.1556	100002	100000	100001
20.5	0	11.9828	0	28.43	20.7048	33.217	27.2213	0.237734	0	19.1628	100002	100000	100001
20.55	0	11.9871	0	28.4224	20.712	33.2123	27.231	0.227073	0	19.1697	100002	100000	100001
20.6	0	11.9912	0	28.4151	20.7189	33.2078	27.2403	0.216887	0	19.1762	100002	100000	100001
20.65	0	11.9951	0	28.4082	20.7255	33.2035	27.2492	0.207153	0	19.1825	100002	100000	100001
20.7	0	11.9989	0	28.4016	20.7318	33.1994	27.2577	0.197853	0	19.1885	100002	100000	100001
20.75	0	12.0025	0	28.3952	20.7378	33.1954	27.2658	0.188967	0	19.1942	100002	100000	100001
20.8	0	12.0059	0	28.3892	20.7436	33.1917	27.2735	0.180477	0	19.1997	100002	100000	100001
20.85	0	12.0091	0	28.3834	20.7491	33.1881	27.2809	0.172365	0	19.2049	100002	100000	100001
20.9	0	12.0123	0	28.3778	20.7543	33.1847	27.2879	0.164616	0	19.2099	100002	100000	100001
20.95	0	12.0152	0	28.3726	20.7593	33.1814	27.2947	0.157213	0	19.2147	100002	100000	100001
21	0	12.0181	0	28.3675	20.7641	33.1783	27.3011	0.150141	0	19.2192	100002	100000	100001
21.05	0	12.0208	0	28.3627	20.7687	33.1753	27.3073	0.143384	0	19.2236	100002	100000	100001
21.1	0	12.0234	0	28.3581	20.7731	33.1724	27.3132	0.136931	0	19.2277	100002	100000	100001
21.15	0	12.0259	0	28.3537	20.7772	33.1697	27.3188	0.130766	0	19.2317	100002	100000	100001
21.2	0	12.0282	0	28.3495	20.7812	33.1671	27.3241	0.124877	0	19.2355	100002	100000	100001
21.25	0	12.0305	0	28.3455	20.785	33.1646	27.3293	0.119252	0	19.2391	100002	100000	100001
21.3	0	12.0327	0	28.3416	20.7887	33.1622	27.3342	0.113879	0	19.2426	100002	100000	100001
21.35	0	12.0347	0	28.338	20.7922	33.16	27.3388	0.108747	0	19.2459	100002	100000	100001
21.4	0	12.0367	0	28.3345	20.7955	33.1578	27.3433	0.103846	0	19.249	100002	100000	100001
21.45	0	12.0386	0	28.3311	20.7987	33.1557	27.3476	0.0991642	0	19.252	100002	100000	100001
21.5	0	12.0404	0	28.3279	20.8017	33.1538	27.3516	0.0946928	0	19.2549	100002	100000	100001
21.55	0	12.0421	0	28.3249	20.8046	33.1519	27.3555	0.0904223	0	19.2577	100002	100000	100001
21.6	0	12.0438	0	28.322	20.8074	33.1501	27.3593	0.0863438	0	19.2603	100002	100000	100001
21.65	0	12.0453	0	28.3192	20.81	33.1484	27.3628	0.0824485	0	19.2628	100002	100000	100001
21.7	0	12.0468	0	28.3165	20.8125	33.1467	27.3662	0.0787284	0	19.2652	100002	100000	100001
21.75	0	12.0482	0	28.314	20.8149	33.1451	27.3694	0.0751756	0	19.2675	100002	100000	100001
21.8	0	12.0496	0	28.3116	20.8172	33.1436	27.3725	0.0717827	0	19.2697	100002	100000	100001
21.85	0	12.0509	0	28.3093	20.8194	33.1422	27.3755	0.0685425	0	19.2718	100002	100000	100001
21.9	0	12.0522	0	28.3071	20.8215	33.1408	27.3783	0.0654481	0	19.2738	100002	100000	100001
21.95	0	12.0534	0	28.3049	20.8235	33.1395	27.381	0.0624931	0	19.2757	100002	100000	100001
22	0	12.0545	0	28.3029	20.8254	33.1383	27.3836	0.0596711	0	19.2775	100002	100000	100001
22.05	0	12.0556	0	28.301	20.8273	33.1371	27.386	0.0569763	0	19.2792	100002	100000	100001
22.1	0	12.0566	0	28.2992	20.829	33.136	27.3884	0.0544029	0	19.2809	100002	100000	100001
22.15	0	12.0576	0	28.2974	20.8307	33.1349	27.3906	0.0519455	0	19.2824	100002	100000	100001
22.2	0	12.0585	0	28.2957	20.8323	33.1338	27.3927	0.0495989	0	19.284	100002	100000	100001
22.25	0	12.0594	0	28.2941	20.8338	33.1329	27.3948	0.047358	0	19.2854	100002	100000	100001
22.3	0	12.0603	0	28.2926	20.8352	33.1319	27.3967	0.0452182	0	19.2868	100002	100000	100001
22.35	0	12.0611	0	28.2912	20.8366	33.131	27.3986	0.0431749	0	19.2881	100002	100000	100001
22.4	0	12.0619	0	28.2898	20.8379	33.1301	27.4004	0.0412238	0	19.2894	100002	100000	100001
22.45	0	12.0627	0	28.2884	20.8392	33.1293	27.4021	0.0393607	0	19.2906	100002	100000	100001
22.5	0	12.0634	0	28.2872	20.8404	33.1285	27.4037	0.0375817	0	19.2917	100002	100000	100001
22.55	0	12.0641	0	28.286	20.8415	33.1278	27.4052	0.035883	0	19.2928	100002	100000	100001
22.6	0	12.0647	0	28.2848	20.8426	33.1271	27.4067	0.0342609	0	19.2938	100002	100000	100001
22.65	0	12.0653	0	28.2837	20.8437	33.1264	27.4081	0.0327121	0	19.2948	100002	100000	100001
22.7	0	12.0659	0	28.2826	20.8447	33.1257	27.4095	0.0312332	0	19.2958	100002	100000	100001
22.75	0	12.0665	0	28.2816	20.8457	33.1251	27.4108	0.0298211	0	19.2967	100002	100000	100001
22.8	0	12.067	0	28.2807	20.8466	33.1245	27.412	0.0284727	0	19.2976	100002	100000	100001
22.85	0	12.0676	0	28.2797	20.8474	33.1239	27.4132	0.0271853	0	19.2984	100002	100000	100001
22.9	0	12.0681	0	28.2789	20.8483	33.1234	27.4143	0.0259559	0	19.2992	100002	100000	100001
22.95	0	12.0685	0	28.278	20.8491	33.1229	27.4153	0.0247822	0	19.2999	100002	100000	100001
23	0	12.069	0	28.2772	20.8498	33.1224	27.4164	0.0236614	0	19.3007	100002	100000	100001
23.05	0	12.0694	0	28.2765	20.8506	33.1219	27.4173	0.0225913	0	19.3013	100002	100000	100001
23.1	0	12.0698	0	28.2757	20.8512	33.1215	27.4183	0.0215695	0	19.302	100002	100000	100001
23.15	0	12.0702	0	28.275	20.8519	33.121	27.4192	0.020594	0	19.3026	100002	100000	100001
23.2	0	12.0706	0	28.2744	20.8525	33.1206	27.42	0.0196625	0	19.3032	100002	100000	100001
23.25	0	12.0709	0	28.2737	20.8531	33.1202	27.4208	0.0187731	0	19.3038	100002	100000	100001
23.3	0	12.0713	0	28.2731	20.8537	33.1199	27.4216	0.0179239	0	19.3044	100002	100000	100001
23.35	0	12.0716	0	28.2726	20.8543	33.1195	27.4223	0.0171131	0	19.3049	100002	100000	100001
23.4	0	12.0719	0	28.272	20.8548	33.1192	27.423	0.0163389	0	19.3054	100002	100000	100001
23.45	0	12.0722	0	28.2715	20.8553	33.1188	27.4237	0.0155997	0	19.3059	100002	100000	100001
23.5	0	12.0725	0	28.271	20.8558	33.1185	27.4244	0.014894	0	19.3063	100002	100000	100001
23.55	0	12.0728	0	28.2705	20.8562	33.1182	27.425	0.0142202	0	19.3067	100002	100000	100001
23.6	0	12.073	0	28.27	20.8567	33.1179	27.4256	0.0135768	0	19.3072	100002	100000	100001
23.65	0	12.0733	0	28.2696	20.8571	33.1177	27.4261	0.0129625	0	19.3075	100002	100000	100001
23.7	0	12.0735	0	28.2692	20.8575	33.1174	27.4266	0.012376	0	19.3079	100002	100000	100001
23.75	0	12.0737	0	28.2688	20.8579	33.1172	27.4272	0.0118161	0	19.3083	100002	100000	100001
23.8	0	12.074	0	28.2684	20.8582	33.1169	27.4276	0.0112814	0	19.3086	100002	100000	100001
23.85	0	12.0742	0	28.268	20.8586	33.1167	27.4281	0.010771	0	19.309	100002	100000	100001
23.9	0	12.0744	0	28.2677	20.8589	33.1165	27.4286	0.0102836	0	19.3093	100002	100000	100001
23.95	0	12.0746	0	28.2673	20.8592	33.1163	27.429	0.00981825	0	19.3096	100002	100000	100001
24	0	12.0747	0	28.267	20.8595	33.1161	27.4294	0.00937397	0	19.3099	100002	100000	100001
24.05	0	12.0749	0	28.2667	20.8598	33.1159	27.4298	0.00894978	0	19.3101	100002	100000	100001
24.1	0	12.0751	0	28.2664	20.8601	33.1157	27.4301	0.00854478	0	19.3104	100002	100000	100001
24.15	0	12.0752	0	28.2662	20.8603	33.1155	27.4305	0.0081581	0	19.3106	100002	100000	100001
24.2	0	12.0754	0	28.2659	20.8606	33.1154	27.4308	0.00778892	0	19.3109	100002	100000	100001
24.25	0	12.0755	0	28.2656	20.8608	33.1152	27.4311	0.00743643	0	19.3111	100002	100000	100001
24.3	0	12.0756	0	28.2654	20.8611	33.1151	27.4315	0.0070999	0	19.3113	100002	100000	100001
24.35	0	12.0758	0	28.2652	20.8613	33.1149	27.4317	0.00677859	0	19.3115	100002	100000	100001
24.4	0	12.0759	0	28.265	20.8615	33.1148	27.432	0.00647181	0	19.3117	100002	100000	100001
24.45	0	12.076	0	28.2648	20.8617	33.1147	27.4323	0.00617892	0	19.3119	100002	100000	100001
24.5	0	12.0761	0	28.2646	20.8619	33.1145	27.4325	0.00589927	0	19.3121	100002	100000	100001
24.55	0	12.0762	0	28.2644	20.862	33.1144	27.4328	0.00563228	0	19.3123	100002	100000	100001
24.6	0	12.0763	0	28.2642	20.8622	33.1143	27.433	0.00537738	0	19.3124	100002	100000	100001
24.65	0	12.0764	0	28.264	20.8624	33.1142	27.4332	0.005134	0	19.3126	100002	100000	100001
24.7	0	12.0765	0	28.2638	20.8625	33.1141	27.4335	0.00490164	0	19.3127	100002	100000	100001
24.75	0	12.0766	0	28.2637	20.8627	33.114	27.4337	0.00467979	0	19.3129	100002	100000	100001
24.8	0	12.0767	0	28.2635	20.8628	33.1139	27.4338	0.00446799	0	19.313	100002	100000	100001
24.85	0	12.0768	0	28.2634	20.863	33.1138	27.434	0.00426576	0	19.3131	100002	100000	100001
24.9	0	12.0769	0	28.2632	20.8631	33.1137	27.4342	0.00407269	0	19.3133	100002	100000	100001
24.95	0	12.0769	0	28.2631	20.8632	33.1137	27.4344	0.00388835	0	19.3134	100002	100000	100001
25	0	12.077	0	28.263	20.8633	33.1136	27.4345	0.00371236	0	19.3135	100002	100000	100001
25.05	0	12.0771	0	28.2629	20.8635	33.1135	27.4347	0.00354433	0	19.3136	100002	100000	100001
25.1	0	12.0771	0	28.2628	20.8636	33.1134	27.4348	0.00338391	0	19.3137	100002	100000	100001
25.15	0	12.0772	0	28.2626	20.8637	33.1134	27.435	0.00323074	0	19.3138	100002	100000	100001
25.2	0	12.0773	0	28.2625	20.8638	33.1133	27.4351	0.00308451	0	19.3139	100002	100000	100001
25.25	0	12.0773	0	28.2624	20.8639	33.1132	27.4352	0.0029449	0	19.314	100002	100000	100001
25.3	0	12.0774	0	28.2623	20.864	33.1132	27.4354	0.0028116	0	19.3141	100002	100000	100001
25.35	0	12.0774	0	28.2623	20.864	33.1131	27.4355	0.00268434	0	19.3142	100002	100000	100001
25.4	0	12.0775	0	28.2622	20.8641	33.1131	27.4356	0.00256284	0	19.3142	100002	100000	100001
25.45	0	12.0775	0	28.2621	20.8642	33.113	27.4357	0.00244683	0	19.3143	100002	100000	100001
25.5	0	12.0776	0	28.262	20.8643	33.113	27.4358	0.00233608	0	19.3144	100002	100000	100001
25.55	0	12.0776	0	28.2619	20.8644	33.1129	27.4359	0.00223034	0	19.3145	100002	100000	100001
25.6	0	12.0776	0	28.2619	20.8644	33.1129	27.436	0.00212938	0	19.3145	100002	100000	100001
25.65	0	12.0777	0	28.2618	20.8645	33.1128	27.4361	0.002033	0	19.3146	100002	100000	100001
25.7	0	12.0777	0	28.2617	20.8645	33.1128	27.4362	0.00194097	0	19.3146	100002	100000	100001
25.75	0	12.0778	0	28.2617	20.8646	33.1128	27.4362	0.00185311	0	19.3147	100002	100000	100001
25.8	0	12.0778	0	28.2616	20.8647	33.1127	27.4363	0.00176923	0	19.3148	100002	100000	100001
25.85	0	12.0778	0	28.2615	20.8647	33.1127	27.4364	0.00168915	0	19.3148	100002	100000	100001
25.9	0	12.0779	0	28.2615	20.8648	33.1127	27.4365	0.00161269	0	19.3149	100002	100000	100001
25.95	0	12.0779	0	28.2614	20.8648	33.1126	27.4365	0.00153969	0	19.3149	100002	100000	100001
26	0	12.0779	0	28.2614	20.8649	33.1126	27.4366	0.00146999	0	19.3149	100002	100000	100001
26.05	0	12.0779	0	28.2613	20.8649	33.1126	27.4366	0.00140345	0	19.315	100002	100000	100001
26.1	0	12.078	0	28.2613	20.865	33.1125	27.4367	0.00133992	0	19.315	100002	100000	100001
26.15	0	12.078	0	28.2613	20.865	33.1125	27.4368	0.00127927	0	19.3151	100002	100000	100001
26.2	0	12.078	0	28.2612	20.865	33.1125	27.4368	0.00122136	0	19.3151	100002	100000	100001
26.25	0	12.078	0	28.2612	20.8651	33.1125	27.4369	0.00116608	0	19.3151	100002	100000	100001
26.3	0	12.0781	0	28.2611	20.8651	33.1124	27.4369	0.00111329	0	19.3152	100002	100000	100001
26.35	0	12.0781	0	28.2611	20.8651	33.1124	27.437	0.0010629	0	19.3152	100002	100000	100001
26.4	0	12.0781	0	28.2611	20.8652	33.1124	27.437	0.00101478	0	19.3152	100002	100000	100001
26.45	0	12.0781	0	28.261	20.8652	33.1124	27.437	0.000968847	0	19.3153	100002	100000	100001
26.5	0	12.0781	0	28.261	20.8652	33.1123	27.4371	0.00092499	0	19.3153	100002	100000	100001
26.55	0	12.0781	0	28.261	20.8653	33.1123	27.4371	0.000883119	0	19.3153	100002	100000	100001
26.6	0	12.0782	0	28.2609	20.8653	33.1123	27.4372	0.000843142	0	19.3154	100002	100000	100001
26.65	0	12.0782	0	28.2609	20.8653	33.1123	27.4372	0.000804976	0	19.3154	100002	100000	100001
26.7	0	12.0782	0	28.2609	20.8653	33.1123	27.4372	0.000768537	0	19.3154	100002	100000	100001
26.75	0	12.0782	0	28.2609	20.8654	33.1123	27.4373	0.000733747	0	19.3154	100002	100000	100001
26.8	0	12.0782	0	28.2608	20.8654	33.1122	27.4373	0.000700533	0	19.3154	100002	100000	100001
26.85	0	12.0782	0	28.2608	20.8654	33.1122	27.4373	0.000668822	0	19.3155	100002	100000	100001
26.9	0	12.0782	0	28.2608	20.8654	33.1122	27.4373	0.000638546	0	19.3155	100002	100000	100001
26.95	0	12.0783	0	28.2608	20.8654	33.1122	27.4374	0.00060964	0	19.3155	100002	100000	100001
27	0	12.0783	0	28.2608	20.8655	33.1122	27.4374	0.000582044	0	19.3155	100002	100000	100001
27.05	0	12.0783	0	28.2607	20.8655	33.1122	27.4374	0.000555696	0	19.3155	100002	100000	100001
27.1	0	12.0783	0	28.2607	20.8655	33.1122	27.4374	0.000530541	0	19.3156	100002	100000	100001
27.15	0	12.0783	0	28.2607	20.8655	33.1122	27.4375	0.000506525	0	19.3156	100002	100000	100001
27.2	0	12.0783	0	28.2607	20.8655	33.1122	27.4375	0.000483595	0	19.3156	100002	100000	100001
27.25	0	12.0783	0	28.2607	20.8655	33.1121	27.4375	0.000461704	0	19.3156	100002	100000	100001
27.3	0	12.0783	0	28.2607	20.8656	33.1121	27.4375	0.000440804	0	19.3156	100002	100000	100001
27.35	0	12.0783	0	28.2606	20.8656	33.1121	27.4375	0.00042085	0	19.3156	100002	100000	100001
27.4	0	12.0783	0	28.2606	20.8656	33.1121	27.4376	0.000401799	0	19.3156	100002	100000	100001
27.45	0	12.0783	0	28.2606	20.8656	33.1121	27.4376	0.00038361	0	19.3156	100002	100000	100001
27.5	0	12.0784	0	28.2606	20.8656	33.1121	27.4376	0.000366245	0	19.3157	100002	100000	100001
27.55	0	12.0784	0	28.2606	20.8656	33.1121	27.4376	0.000349666	0	19.3157	100002	100000	100001
27.6	0	12.0784	0	28.2606	20.8656	33.1121	27.4376	0.000333837	0	19.3157	100002	100000	100001
27.65	0	12.0784	0	28.2606	20.8656	33.1121	27.4376	0.000318725	0	19.3157	100002	100000	100001
27.7	0	12.0784	0	28.2606	20.8657	33.1121	27.4376	0.000304297	0	19.3157	100002	100000	100001
27.75	0	12.0784	0	28.2605	20.8657	33.1121	27.4377	0.000290522	0	19.3157	100002	100000	100001
27.8	0	12.0784	0	28.2605	20.8657	33.1121	27.4377	0.000277371	0	19.3157	100002	100000	100001
27.85	0	12.0784	0	28.2605	20.8657	33.1121	27.4377	0.000264814	0	19.3157	100002	100000	100001
27.9	0	12.0784	0	28.2605	20.8657	33.112	27.4377	0.000252827	0	19.3157	100002	100000	100001
27.95	0	12.0784	0	28.2605	20.8657	33.112	27.4377	0.000241382	0	19.3157	100002	100000	100001
28	0	12.0784	0	28.2605	20.8657	33.112	27.4377	0.000230455	0	19.3157	100002	100000	100001
28.05	0	12.0784	0	28.2605	20.8657	33.112	27.4377	0.000220023	0	19.3158	100002	100000	100001
28.1	0	12.0784	0	28.2605	20.8657	33.112	27.4377	0.000210063	0	19.3158	100002	100000	100001
28.15	0	12.0784	0	28.2605	20.8657	33.112	27.4377	0.000200553	0	19.3158	100002	100000	100001
28.2	0	12.0784	0	28.2605	20.8657	33.112	27.4377	0.000191475	0	19.3158	100002	100000	100001
28.25	0	12.0784	0	28.2605	20.8657	33.112	27.4378	0.000182807	0	19.3158	100002	100000	100001
28.3	0	12.0784	0	28.2605	20.8657	33.112	27.4378	0.000174532	0	19.3158	100002	100000	100001
28.35	0	12.0784	0	28.2605	20.8657	33.112	27.4378	0.000166631	0	19.3158	100002	100000	100001
28.4	0	12.0784	0	28.2605	20.8658	33.112	27.4378	0.000159088	0	19.3158	100002	100000	100001
28.45	0	12.0784	0	28.2604	20.8658	33.112	27.4378	0.000151886	0	19.3158	100002	100000	100001
28.5	0	12.0784	0	28.2604	20.8658	33.112	27.4378	0.000145011	0	19.3158	100002	100000	100001
28.55	0	12.0784	0	28.2604	20.8658	33.112	27.4378	0.000138446	0	19.3158	100002	100000	100001
28.6	0	12.0784	0	28.2604	20.8658	33.112	27.4378	0.000132179	0	19.3158	100002	100000	100001
28.65	0	12.0785	0	28.2604	20.8658	33.112	27.4378	0.000126195	0	19.3158	100002	100000	100001
28.7	0	12.0785	0	28.2604	20.8658	33.112	27.4378	0.000120483	0	19.3158	100002	100000	100001
28.75	0	12.0785	0	28.2604	20.8658	33.112	27.4378	0.000115029	0	19.3158	100002	100000	100001
28.8	0	12.0785	0	28.2604	20.8658	33.112	27.4378	0.000109822	0	19.3158	100002	100000	100001
28.85	0	12.0785	0	28.2604	20.8658	33.112	27.4378	0.00010485	0	19.3158	100002	100000	100001
28.9	0	12.0785	0	28.2604	20.8658	33.112	27.4378	0.000100104	0	19.3158	100002	100000	100001
28.95	0	12.0785	0	28.2604	20.8658	33.112	27.4378	9.55722e-05	0	19.3158	100002	100000	100001
29	0	12.0785	0	28.2604	20.8658	33.112	27.4378	9.12458e-05	0	19.3158	100002	100000	100001
29.05	0	12.0785	0	28.2604	20.8658	33.112	27.4378	8.71152e-05	0	19.3158	100002	100000	100001
29.1	0	12.0785	0	28.2604	20.8658	33.112	27.4378	8.31717e-05	0	19.3158	100002	100000	100001
29.15	0	12.0785	0	28.2604	20.8658	33.112	27.4378	7.94066e-05	0	19.3158	100002	100000	100001
29.2	0	12.0785	0	28.2604	20.8658	33.112	27.4379	7.5812e-05	0	19.3158	100002	100000	100001
29.25	0	12.0785	0	28.2604	20.8658	33.112	27.4379	7.23801e-05	0	19.3158	100002	100000	100001
29.3	0	12.0785	0	28.2604	20.8658	33.112	27.4379	6.91036e-05	0	19.3159	100002	100000	100001
29.35	0	12.0785	0	28.2604	20.8658	33.112	27.4379	6.59754e-05	0	19.3159	100002	100000	100001
29.4	0	12.0785	0	28.2604	20.8658	33.112	27.4379	6.29888e-05	0	19.3159	100002	100000	100001
29.45	0	12.0785	0	28.2604	20.8658	33.112	27.4379	6.01374e-05	0	19.3159	100002	100000	100001
29.5	0	12.0785	0	28.2604	20.8658	33.112	27.4379	5.7415e-05	0	19.3159	100002	100000	100001
29.55	0	12.0785	0	28.2604	20.8658	33.112	27.4379	5.48159e-05	0	19.3159	100002	100000	100001
29.6	0	12.0785	0	28.2604	20.8658	33.112	27.4379	5.23345e-05	0	19.3159	100002	100000	100001
29.65	0	12.0785	0	28.2604	20.8658	33.112	27.4379	4.99654e-05	0	19.3159	100002	100000	100001
29.7	0	12.0785	0	28.2604	20.8658	33.112	27.4379	4.77035e-05	0	19.3159	100002	100000	100001
29.75	0	12.0785	0	28.2604	20.8658	33.112	27.4379	4.55441e-05	0	19.3159	100002	100000	100001
29.8	0	12.0785	0	28.2604	20.8658	33.112	27.4379	4.34824e-05	0	19.3159	100002	100000	100001
29.85	0	12.0785	0	28.2604	20.8658	33.112	27.4379	4.1514e-05	0	19.3159	100002	100000	100001
29.9	0	12.0785	0	28.2604	20.8658	33.112	27.4379	3.96347e-05	0	19.3159	100002	100000	100001
29.95	0	12.0785	0	28.2604	20.8658	33.112	27.4379	3.78405e-05	0	19.3159	100002	100000	100001
30	0	12.0785	0	28.2604	20.8658	33.112	27.4379	3.61275e-05	0	19.3159	100002	100000	100001
30.05	0	12.0785	0	28.2604	20.8658	33.112	27.4379	3.44921e-05	0	19.3159	100002	100000	100001
30.1	0	12.0785	0	28.2604	20.8658	33.112	27.4379	3.29307e-05	0	19.3159	100002	100000	100001
30.15	0	12.0785	0	28.2604	20.8658	33.112	27.4379	3.144e-05	0	19.3159	100002	100000	100001
30.2	0	12.0785	0	28.2604	20.8658	33.112	27.4379	3.00167e-05	0	19.3159	100002	100000	100001
30.25	0	12.0785	0	28.2604	20.8658	33.112	27.4379	2.86579e-05	0	19.3159	100002	100000	100001
30.3	0	12.0785	0	28.2604	20.8658	33.1119	27.4379	2.73606e-05	0	19.3159	100002	100000	100001
30.35	0	12.0785	0	28.2604	20.8658	33.1119	27.4379	2.6122e-05	0	19.3159	100002	100000	100001
30.4	0	12.0785	0	28.2604	20.8658	33.1119	27.4379	2.49395e-05	0	19.3159	100002	100000	100001
30.45	0	12.0785	0	28.2604	20.8658	33.1119	27.4379	2.38105e-05	0	19.3159	100002	100000	100001
30.5	0	12.0785	0	28.2604	20.8658	33.1119	27.4379	2.27327e-05	0	19.3159	100002	100000	100001
30.55	0	12.0785	0	28.2604	20.8658	33.1119	27.4379	2.17036e-05	0	19.3159	100002	100000	100001
30.6	0	12.0785	0	28.2604	20.8658	33.1119	27.4379	2.07211e-05	0	19.3159	100002	100000	100001
30.65	0	12.0785	0	28.2604	20.8658	33.1119	27.4379	1.97831e-05	0	19.3159	100002	100000	100001
30.7	0	12.0785	0	28.2604	20.8658	33.1119	27.4379	1.88875e-05	0	19.3159	100002	100000	100001
30.75	0	12.0785	0	28.2604	20.8659	33.1119	27.4379	1.80325e-05	0	19.3159	100002	100000	100001
30.8	0	12.0785	0	28.2604	20.8659	33.1119	27.4379	1.72162e-05	0	19.3159	100002	100000	100001
30.85	0	12.0785	0	28.2604	20.8659	33.1119	27.4379	1.64369e-05	0	19.3159	100002	100000	100001
30.9	0	12.0785	0	28.2604	20.8659	33.1119	27.4379	1.56928e-05	0	19.3159	100002	100000	100001
30.95	0	12.0785	0	28.2604	20.8659	33.1119	27.4379	1.49824e-05	0	19.3159	100002	100000	100001
31	0	12.0785	0	28.2604	20.8659	33.1119	27.4379	1.43042e-05	0	19.3159	100002	100000	100001
31.05	0	12.0785	0	28.2603	20.8659	33.1119	27.4379	1.36566e-05	0	19.3159	100002	100000	100001
31.1	0	12.0785	0	28.2603	20.8659	33.1119	27.4379	1.30384e-05	0	19.3159	100002	100000	100001
31.15	0	12.0785	0	28.2603	20.8659	33.1119	27.4379	1.24482e-05	0	19.3159	100002	100000	100001
31.2	0	12.0785	0	28.2603	20.8659	33.1119	27.4379	1.18847e-05	0	19.3159	100002	100000	100001
31.25	0	12.0785	0	28.2603	20.8659	33.1119	27.4379	1.13467e-05	0	19.3159	100002	100000	100001
31.3	0	12.0785	0	28.2603	20.8659	33.1119	27.4379	1.0833e-05	0	19.3159	100002	100000	100001
31.35	0	12.0785	0	28.2603	20.8659	33.1119	27.4379	1.03426e-05	0	19.3159	100002	100000	100001
31.4	0	12.0785	0	28.2603	20.8659	33.1119	27.4379	9.87444e-06	0	19.3159	100002	100000	100001
31.45	0	12.0785	0	28.2603	20.8659	33.1119	27.4379	9.42744e-06	0	19.3159	100002	100000	100001
31.5	0	12.0785	0	28.2603	20.8659	33.1119	27.4379	9.00067e-06	0	19.3159	100002	100000	100001
31.55	0	12.0785	0	28.2603	20.8659	33.1119	27.4379	8.59323e-06	0	19.3159	100002	100000	100001
31.6	0	12.0785	0	28.2603	20.8659	33.1119	27.4379	8.20422e-06	0	19.3159	100002	100000	100001
31.65	0	12.0785	0	28.2603	20.8659	33.1119	27.4379	7.83283e-06	0	19.3159	100002	100000	100001
31.7	0	12.0785	0	28.2603	20.8659	33.1119	27.4379	7.47825e-06	0	19.3159	100002	100000	100001
31.75	0	12.0785	0	28.2603	20.8659	33.1119	27.4379	7.13972e-06	0	19.3159	100002	100000	100001
31.8	0	12.0785	0	28.2603	20.8659	33.1119	27.4379	6.81651e-06	0	19.3159	100002	100000	100001
31.85	0	12.0785	0	28.2603	20.8659	33.1119	27.4379	6.50794e-06	0	19.3159	100002	100000	100001
31.9	0	12.0785	0	28.2603	20.8659	33.1119	27.4379	6.21334e-06	0	19.3159	100002	100000	100001
31.95	0	12.0785	0	28.2603	20.8659	33.1119	27.4379	5.93207e-06	0	19.3159	100002	100000	100001
32	0	12.0785	0	28.2603	20.8659	33.1119	27.4379	5.66353e-06	0	19.3159	100002	100000	100001
32.05	0	12.0785	0	28.2603	20.8659	33.1119	27.4379	5.40715e-06	0	19.3159	100002	100000	100001
32.1	0	12.0785	0	28.2603	20.8659	33.1119	27.4379	5.16238e-06	0	19.3159	100002	100000	100001
32.15	0	12.0785	0	28.2603	20.8659	33.1119	27.4379	4.92868e-06	0	19.3159	100002	100000	100001
32.2	0	12.0785	0	28.2603	20.8659	33.1119	27.4379	4.70557e-06	0	19.3159	100002	100000	100001
32.25	0	12.0785	0	28.2603	20.8659	33.1119	27.4379	4.49255e-06	0	19.3159	100002	100000	100001
32.3	0	12.0785	0	28.2603	20.8659	33.1119	27.4379	4.28918e-06	0	19.3159	100002	100000	100001
32.35	0	12.0785	0	28.2603	20.8659	33.1119	27.4379	4.09502e-06	0	19.3159	100002	100000	100001
32.4	0	12.0785	0	28.2603	20.8659	33.1119	27.4379	3.90964e-06	0	19.3159	100002	100000	100001
32.45	0	12.0785	0	28.2603	20.8659	33.1119	27.4379	3.73266e-06	0	19.3159	100002	100000	100001
32.5	0	12.0785	0	28.2603	20.8659	33.1119	27.4379	3.56369e-06	0	19.3159	100002	100000	100001
32.55	0	12.0785	0	28.2603	20.8659	33.1119	27.4379	3.40236e-06	0	19.3159	100002	100000	100001
32.6	0	12.0785	0	28.2603	20.8659	33.1119	27.4379	3.24834e-06	0	19.3159	100002	100000	100001
32.65	0	12.0785	0	28.2603	20.8659	33.1119	27.4379	3.10129e-06	0	19.3159	100002	100000	100001
32.7	0	12.0785	0	28.2603	20.8659	33.1119	27.4379	2.9609e-06	0	19.3159	100002	100000	100001
32.75	0	12.0785	0	28.2603	20.8659	33.1119	27.4379	2.82687e-06	0	19.3159	100002	100000	100001
32.8	0	12.0785	0	28.2603	20.8659	33.1119	27.4379	2.6989e-06	0	19.3159	100002	100000	100001
32.85	0	12.0785	0	28.2603	20.8659	33.1119	27.4379	2.57672e-06	0	19.3159	100002	100000	100001
32.9	0	12.0785	0	28.2603	20.8659	33.1119	27.4379	2.46008e-06	0	19.3159	100002	100000	100001
32.95	0	12.0785	0	28.2603	20.8659	33.1119	27.4379	2.34872e-06	0	19.3159	100002	100000	100001
33	0	12.0785	0	28.2603	20.8659	33.1119	27.4379	2.24239e-06	0	19.3159	100002	100000	100001
33.05	0	12.0785	0	28.2603	20.8659	33.1119	27.4379	2.14088e-06	0	19.3159	100002	100000	100001
33.1	0	12.0785	0	28.2603	20.8659	33.1119	27.4379	2.04397e-06	0	19.3159	100002	100000	100001
33.15	0	12.0785	0	28.2603	20.8659	33.1119	27.4379	1.95144e-06	0	19.3159	100002	100000	100001
33.2	0	12.0785	0	28.2603	20.8659	33.1119	27.4379	1.8631e-06	0	19.3159	100002	100000	100001
33.25	0	12.0785	0	28.2603	20.8659	33.1119	27.4379	1.77876e-06	0	19.3159	100002	100000	100001
33.3	0	12.0785	0	28.2603	20.8659	33.1119	27.4379	1.69824e-06	0	19.3159	100002	100000	100001
33.35	0	12.0785	0	28.2603	20.8659	33.1119	27.4379	1.62136e-06	0	19.3159	100002	100000	100001
33.4	0	12.0785	0	28.2603	20.8659	33.1119	27.4379	1.54797e-06	0	19.3159	100002	100000	100001
33.45	0	12.0785	0	28.2603	20.8659	33.1119	27.4379	1.47789e-06	0	19.3159	100002	100000	100001
33.5	0	12.0785	0	28.2603	20.8659	33.1119	27.4379	1.41099e-06	0	19.3159	100002	100000	100001
33.55	0	12.0785	0	28.2603	20.8659	33.1119	27.4379	1.34712e-06	0	19.3159	100002	100000	100001
33.6	0	12.0785	0	28.2603	20.8659	33.1119	27.4379	1.28613e-06	0	19.3159	100002	100000	100001
33.65	0	12.0785	0	28.2603	20.8659	33.1119	27.4379	1.22791e-06	0	19.3159	100002	100000	100001
33.7	0	12.0785	0	28.2603	20.8659	33.1119	27.4379	1.17233e-06	0	19.3159	100002	100000	100001
33.75	0	12.0785	0	28.2603	20.8659	33.1119	27.4379	1.11926e-06	0	19.3159	100002	100000	100001
33.8	0	12.0785	0	28.2603	20.8659	33.1119	27.4379	1.06859e-06	0	19.3159	100002	100000	100001
33.85	0	12.0785	0	28.2603	20.8659	33.1119	27.4379	1.02022e-06	0	19.3159	100002	100000	100001
33.9	0	12.0785	0	28.2603	20.8659	33.1119	27.4379	9.74032e-07	0	19.3159	100002	100000	100001
33.95	0	12.0785	0	28.2603	20.8659	33.1119	27.4379	9.29939e-07	0	19.3159	100002	100000	100001
34	0	12.0785	0	28.2603	20.8659	33.1119	27.4379	8.87842e-07	0	19.3159	100002	100000	100001
34.05	0	12.0785	0	28.2603	20.8659	33.1119	27.4379	8.47651e-07	0	19.3159	100002	100000	100001
34.1	0	12.0785	0	28.2603	20.8659	33.1119	27.4379	8.09279e-07	0	19.3159	100002	100000	100001
34.15	0	12.0785	0	28.2603	20.8659	33.1119	27.4379	7.72644e-07	0	19.3159	100002	100000	100001
34.2	0	12.0785	0	28.2603	20.8659	33.1119	27.4379	7.37668e-07	0	19.3159	100002	100000	100001
34.25	0	12.0785	0	28.2603	20.8659	33.1119	27.4379	7.04274e-07	0	19.3159	100002	100000	100001
34.3	0	12.0785	0	28.2603	20.8659	33.1119	27.4379	6.72393e-07	0	19.3159	100002	100000	100001
34.35	0	12.0785	0	28.2603	20.8659	33.1119	27.4379	6.41955e-07	0	19.3159	100002	100000	100001
34.4	0	12.0785	0	28.2603	20.8659	33.1119	27.4379	6.12894e-07	0	19.3159	100002	100000	100001
34.45	0	12.0785	0	28.2603	20.8659	33.1119	27.4379	5.85149e-07	0	19.3159	100002	100000	100001
34.5	0	12.0785	0	28.2603	20.8659	33.1119	27.4379	5.58661e-07	0	19.3159	100002	100000	100001
34.55	0	12.0785	0	28.2603	20.8659	33.1119	27.4379	5.33371e-07	0	19.3159	100002	100000	100001
34.6	0	12.0785	0	28.2603	20.8659	33.1119	27.4379	5.09226e-07	0	19.3159	100002	100000	100001
34.65	0	12.0785	0	28.2603	20.8659	33.1119	27.4379	4.86174e-07	0	19.3159	100002	100000	100001
34.7	0	12.0785	0	28.2603	20.8659	33.1119	27.4379	4.64166e-07	0	19.3159	100002	100000	100001
34.75	0	12.0785	0	28.2603	20.8659	33.1119	27.4379	4.43154e-07	0	19.3159	100002	100000	100001
34.8	0	12.0785	0	28.2603	20.8659	33.1119	27.4379	4.23093e-07	0	19.3159	100002	100000	100001
34.85	0	12.0785	0	28.2603	20.8659	33.1119	27.4379	4.03941e-07	0	19.3159	100002	100000	100001
34.9	0	12.0785	0	28.2603	20.8659	33.1119	27.4379	3.85655e-07	0	19.3159	100002	100000	100001
34.95	0	12.0785	0	28.2603	20.8659	33.1119	27.4379	3.68197e-07	0	19.3159	100002	100000	100001
35	0	12.0785	0	28.2603	20.8659	33.1119	27.4379	3.5153e-07	0	19.3159	100002	100000	100001
35.05	0	12.0785	0	28.2603	20.8659	33.1119	27.4379	3.35617e-07	0	19.3159	100002	100000	100001
35.1	0	12.0785	0	28.2603	20.8659	33.1119	27.4379	3.20424e-07	0	19.3159	100002	100000	100001
35.15	0	12.0785	0	28.2603	20.8659	33.1119	27.4379	3.05919e-07	0	19.3159	100002	100000	100001
35.2	0	12.0785	0	28.2603	20.8659	33.1119	27.4379	2.92071e-07	0	19.3159	100002	100000	100001
35.25	0	12.0785	0	28.2603	20.8659	33.1119	27.4379	2.7885e-07	0	19.3159	100002	100000	100001
35.3	0	12.0785	0	28.2603	20.8659	33.1119	27.4379	2.66227e-07	0	19.3159	100002	100000	100001
35.35	0	12.0785	0	28.2603	20.8659	33.1119	27.4379	2.54175e-07	0	19.3159	100002	100000	100001
35.4	0	12.0785	0	28.2603	20.8659	33.1119	27.4379	2.42669e-07	0	19.3159	100002	100000	100001
35.45	0	12.0785	0	28.2603	20.8659	33.1119	27.4379	2.31684e-07	0	19.3159	100002	100000	100001
35.5	0	12.0785	0	28.2603	20.8659	33.1119	27.4379	2.21196e-07	0	19.3159	100002	100000	100001
35.55	0	12.0785	0	28.2603	20.8659	33.1119	27.4379	2.11183e-07	0	19.3159	100002	100000	100001
35.6	0	12.0785	0	28.2603	20.8659	33.1119	27.4379	2.01623e-07	0	19.3159	100002	100000	100001
35.65	0	12.0785	0	28.2603	20.8659	33.1119	27.4379	1.92496e-07	0	19.3159	100002	100000	100001
35.7	0	12.0785	0	28.2603	20.8659	33.1119	27.4379	1.83782e-07	0	19.3159	100002	100000	100001
35.75	0	12.0785	0	28.2603	20.8659	33.1119	27.4379	1.75463e-07	0	19.3159	100002	100000	100001
35.8	0	12.0785	0	28.2603	20.8659	33.1119	27.4379	1.6752e-07	0	19.3159	100002	100000	100001
35.85	0	12.0785	0	28.2603	20.8659	33.1119	27.4379	1.59937e-07	0	19.3159	100002	100000	100001
35.9	0	12.0785	0	28.2603	20.8659	33.1119	27.4379	1.52697e-07	0	19.3159	100002	100000	100001
35.95	0	12.0785	0	28.2603	20.8659	33.1119	27.4379	1.45785e-07	0	19.3159	100002	100000	100001
36	0	12.0785	0	28.2603	20.8659	33.1119	27.4379	1.39185e-07	0	19.3159	100002	100000	100001
36.05	0	12.0785	0	28.2603	20.8659	33.1119	27.4379	1.32885e-07	0	19.3159	100002	100000	100001
36.1	0	12.0785	0	28.2603	20.8659	33.1119	27.4379	1.26869e-07	0	19.3159	100002	100000	100001
36.15	0	12.0785	0	28.2603	20.8659	33.1119	27.4379	1.21126e-07	0	19.3159	100002	100000	100001
36.2	0	12.0785	0	28.2603	20.8659	33.1119	27.4379	1.15643e-07	0	19.3159	100002	100000	100001
36.25	0	12.0785	0	28.2603	20.8659	33.1119	27.4379	1.10408e-07	0	19.3159	100002	100000	100001
36.3	0	12.0785	0	28.2603	20.8659	33.1119	27.4379	1.0541e-07	0	19.3159	100002	100000	100001
36.35	0	12.0785	0	28.2603	20.8659	33.1119	27.4379	1.00638e-07	0	19.3159	100002	100000	100001
36.4	0	12.0785	0	28.2603	20.8659	33.1119	27.4379	9.60827e-08	0	19.3159	100002	100000	100001
36.45	0	12.0785	0	28.2603	20.8659	33.1119	27.4379	9.17332e-08	0	19.3159	100002	100000	100001
36.5	0	12.0785	0	28.2603	20.8659	33.1119	27.4379	8.75806e-08	0	19.3159	100002	100000	100001
36.55	0	12.0785	0	28.2603	20.8659	33.1119	27.4379	8.36161e-08	0	19.3159	100002	100000	100001
36.6	0	12.0785	0	28.2603	20.8659	33.1119	27.4379	7.98309e-08	0	19.3159	100002	100000	100001
36.65	0	12.0785	0	28.2603	20.8659	33.1119	27.4379	7.62171e-08	0	19.3159	100002	100000	100001
36.7	0	12.0785	0	28.2603	20.8659	33.1119	27.4379	7.2767e-08	0	19.3159	100002	100000	100001
36.75	0	12.0785	0	28.2603	20.8659	33.1119	27.4379	6.9473e-08	0	19.3159	100002	100000	100001
36.8	0	12.0785	0	28.2603	20.8659	33.1119	27.4379	6.63281e-08	0	19.3159	100002	100000	100001
36.85	0	12.0785	0	28.2603	20.8659	33.1119	27.4379	6.33255e-08	0	19.3159	100002	100000	100001
36.9	0	12.0785	0	28.2603	20.8659	33.1119	27.4379	6.04589e-08	0	19.3159	100002	100000	100001
36.95	0	12.0785	0	28.2603	20.8659	33.1119	27.4379	5.77221e-08	0	19.3159	100002	100000	100001
37	0	12.0785	0	28.2603	20.8659	33.1119	27.4379	5.51091e-08	0	19.3159	100002	100000	100001
37.05	0	12.0785	0	28.2603	20.8659	33.1119	27.4379	5.26145e-08	0	19.3159	100002	100000	100001
37.1	0	12.0785	0	28.2603	20.8659	33.1119	27.4379	5.02327e-08	0	19.3159	100002	100000	100001
37.15	0	12.0785	0	28.2603	20.8659	33.1119	27.4379	4.79588e-08	0	19.3159	100002	100000	100001
37.2	0	12.0785	0	28.2603	20.8659	33.1119	27.4379	4.57879e-08	0	19.3159	100002	100000	100001
37.25	0	12.0785	0	28.2603	20.8659	33.1119	27.4379	4.37153e-08	0	19.3159	100002	100000	100001
37.3	0	12.0785	0	28.2603	20.8659	33.1119	27.4379	4.17366e-08	0	19.3159	100002	100000	100001
37.35	0	12.0785	0	28.2603	20.8659	33.1119	27.4379	3.98474e-08	0	19.3159	100002	100000	100001
37.4	0	12.0785	0	28.2603	20.8659	33.1119	27.4379	3.80439e-08	0	19.3159	100002	100000	100001
37.45	0	12.0785	0	28.2603	20.8659	33.1119	27.4379	3.63221e-08	0	19.3159	100002	100000	100001
37.5	0	12.0785	0	28.2603	20.8659	33.1119	27.4379	3.46782e-08	0	19.3159	100002	100000	100001
37.55	0	12.0785	0	28.2603	20.8659	33.1119	27.4379	3.31086e-08	0	19.3159	100002	100000	100001
37.6	0	12.0785	0	28.2603	20.8659	33.1119	27.4379	3.161e-08	0	19.3159	100002	100000	100001
37.65	0	12.0785	0	28.2603	20.8659	33.1119	27.4379	3.01794e-08	0	19.3159	100002	100000	100001
37.7	0	12.0785	0	28.2603	20.8659	33.1119	27.4379	2.88136e-08	0	19.3159	100002	100000	100001
37.75	0	12.0785	0	28.2603	20.8659	33.1119	27.4379	2.75096e-08	0	19.3159	100002	100000	100001
37.8	0	12.0785	0	28.2603	20.8659	33.1119	27.4379	2.62644e-08	0	19.3159	100002	100000	100001
37.85	0	12.0785	0	28.2603	20.8659	33.1119	27.4379	2.50756e-08	0	19.3159	100002	100000	100001
37.9	0	12.0785	0	28.2603	20.8659	33.1119	27.4379	2.39407e-08	0	19.3159	100002	100000	100001
37.95	0	12.0785	0	28.2603	20.8659	33.1119	27.4379	2.28571e-08	0	19.3159	100002	100000	100001
38	0	12.0785	0	28.2603	20.8659	33.1119	27.4379	2.18225e-08	0	19.3159	100002	100000	100001
38.05	0	12.0785	0	28.2603	20.8659	33.1119	27.4379	2.08347e-08	0	19.3159	100002	100000	100001
38.1	0	12.0785	0	28.2603	20.8659	33.1119	27.4379	1.98916e-08	0	19.3159	100002	100000	100001
38.15	0	12.0785	0	28.2603	20.8659	33.1119	27.4379	1.89912e-08	0	19.3159	100002	100000	100001
38.2	0	12.0785	0	28.2603	20.8659	33.1119	27.4379	1.81316e-08	0	19.3159	100002	100000	100001
38.25	0	12.0785	0	28.2603	20.8659	33.1119	27.4379	1.7311e-08	0	19.3159	100002	100000	100001
38.3	0	12.0785	0	28.2603	20.8659	33.1119	27.4379	1.65275e-08	0	19.3159	100002	100000	100001
38.35	0	12.0785	0	28.2603	20.8659	33.1119	27.4379	1.57795e-08	0	19.3159	100002	100000	100001
38.4	0	12.0785	0	28.2603	20.8659	33.1119	27.4379	1.50653e-08	0	19.3159	100002	100000	100001
38.45	0	12.0785	0	28.2603	20.8659	33.1119	27.4379	1.43835e-08	0	19.3159	100002	100000	100001
38.5	0	12.0785	0	28.2603	20.8659	33.1119	27.4379	1.37326e-08	0	19.3159	100002	100000	100001
38.55	0	12.0785	0	28.2603	20.8659	33.1119	27.4379	1.3111e-08	0	19.3159	100002	100000	100001
38.6	0	12.0785	0	28.2603	20.8659	33.1119	27.4379	1.25179e-08	0	19.3159	100002	100000	100001
38.65	0	12.0785	0	28.2603	20.8659	33.1119	27.4379	1.19518e-08	0	19.3159	100002	100000	100001
38.7	0	12.0785	0	28.2603	20.8659	33.1119	27.4379	1.14113e-08	0	19.3159	100002	100000	100001
38.75	0	12.0785	0	28.2603	20.8659	33.1119	27.4379	1.08954e-08	0	19.3159	100002	100000	100001
38.8	0	12.0785	0	28.2603	20.8659	33.1119	27.4379	1.04028e-08	0	19.3159	100002	100000	100001
38.85	0	12.0785	0	28.2603	20.8659	33.1119	27.4379	9.93237e-09	0	19.3159	100002	100000	100001
38.9	0	12.0785	0	28.2603	20.8659	33.1119	27.4379	9.48298e-09	0	19.3159	100002	100000	100001
38.95	0	12.0785	0	28.2603	20.8659	33.1119	27.4379	9.05431e-09	0	19.3159	100002	100000	100001
39	0	12.0785	0	28.2603	20.8659	33.1119	27.4379	8.64555e-09	0	19.3159	100002	100000	100001
39.05	0	12.0785	0	28.2603	20.8659	33.1119	27.4379	8.25539e-09	0	19.3159	100002	100000	100001
39.1	0	12.0785	0	28.2603	20.8659	33.1119	27.4379	7.88291e-09	0	19.3159	100002	100000	100001
39.15	0	12.0785	0	28.2603	20.8659	33.1119	27.4379	7.52723e-09	0	19.3159	100002	100000	100001
39.2	0	12.0785	0	28.2603	20.8659	33.1119	27.4379	7.18744e-09	0	19.3159	100002	100000	100001
39.25	0	12.0785	0	28.2603	20.8659	33.1119	27.4379	6.86265e-09	0	19.3159	100002	100000	100001
39.3	0	12.0785	0	28.2603	20.8659	33.1119	27.4379	6.55201e-09	0	19.3159	100002	100000	100001
39.35	0	12.0785	0	28.2603	20.8659	33.1119	27.4379	6.25586e-09	0	19.3159	100002	100000	100001
39.4	0	12.0785	0	28.2603	20.8659	33.1119	27.4379	5.97295e-09	0	19.3159	100002	100000	100001
39.45	0	12.0785	0	28.2603	20.8659	33.1119	27.4379	5.70269e-09	0	19.3159	100002	100000	100001
39.5	0	12.0785	0	28.2603	20.8659	33.1119	27.4379	5.44453e-09	0	19.3159	100002	100000	100001
39.55	0	12.0785	0	28.2603	20.8659	33.1119	27.4379	5.19796e-09	0	19.3159	100002	100000	100001
39.6	0	12.0785	0	28.2603	20.8659	33.1119	27.4379	4.96242e-09	0	19.3159	100002	100000	100001
39.65	0	12.0785	0	28.2603	20.8659	33.1119	27.4379	4.73738e-09	0	19.3159	100002	100000	100001
39.7	0	12.0785	0	28.2603	20.8659	33.1119	27.4379	4.52247e-09	0	19.3159	100002	100000	100001
39.75	0	12.0785	0	28.2603	20.8659	33.1119	27.4379	4.31728e-09	0	19.3159	100002	100000	100001
39.8	0	12.0785	0	28.2603	20.8659	33.1119	27.4379	4.12144e-09	0	19.3159	100002	100000	100001
39.85	0	12.0785	0	28.2603	20.8659	33.1119	27.4379	3.93458e-09	0	19.3159	100002	100000	100001
39.9	0	12.0785	0	28.2603	20.8659	33.1119	27.4379	3.75607e-09	0	19.3159	100002	100000	100001
39.95	0	12.0785	0	28.2603	20.8659	33.1119	27.4379	3.58571e-09	0	19.3159	100002	100000	100001
40	0	12.0785	0	28.2603	20.8659	33.1119	27.4379	3.42315e-09	0	19.3159	100002	100000	100001
40.05	0	12.0785	0	28.2603	20.8659	33.1119	27.4379	3.26803e-09	0	19.3159	100002	100000	100001
40.1	0	12.0785	0	28.2603	20.8659	33.1119	27.4379	3.12004e-09	0	19.3159	100002	100000	100001
40.15	0	12.0785	0	28.2603	20.8659	33.1119	27.4379	2.97885e-09	0	19.3159	100002	100000	100001
40.2	0	12.0785	0	28.2603	20.8659	33.1119	27.4379	2.84413e-09	0	19.3159	100002	100000	100001
40.25	0	12.0785	0	28.2603	20.8659	33.1119	27.4379	2.71556e-09	0	19.3159	100002	100000	100001
40.3	0	12.0785	0	28.2603	20.8659	33.1119	27.4379	2.59283e-09	0	19.3159	100002	100000	100001
40.35	0	12.0785	0	28.2603	20.8659	33.1119	27.4379	2.47562e-09	0	19.3159	100002	100000	100001
40.4	0	12.0785	0	28.2603	20.8659	33.1119	27.4379	2.36368e-09	0	19.3159	100002	100000	100001
40.45	0	12.0785	0	28.2603	20.8659	33.1119	27.4379	2.25716e-09	0	19.3159	100002	100000	100001
40.5	0	12.0785	0	28.2603	20.8659	33.1119	27.4379	2.15556e-09	0	19.3159	100002	100000	100001
40.55	0	12.0785	0	28.2603	20.8659	33.1119	27.4379	2.05861e-09	0	19.3159	100002	100000	100001
40.6	0	12.0785	0	28.2603	20.8659	33.1119	27.4379	1.96606e-09	0	19.3159	100002	100000	100001
40.65	0	12.0785	0	28.2603	20.8659	33.1119	27.4379	1.87765e-09	0	19.3159	100002	100000	100001
40.7	0	12.0785	0	28.2603	20.8659	33.1119	27.4379	1.7931e-09	0	19.3159	100002	100000	100001
40.75	0	12.0785	0	28.2603	20.8659	33.1119	27.4379	1.71214e-09	0	19.3159	100002	100000	100001
40.8	0	12.0785	0	28.2603	20.8659	33.1119	27.4379	1.63492e-09	0	19.3159	100002	100000	100001
40.85	0	12.0785	0	28.2603	20.8659	33.1119	27.4379	1.56159e-09	0	19.3159	100002	100000	100001
40.9	0	12.0785	0	28.2603	20.8659	33.1119	27.4379	1.49157e-09	0	19.3159	100002	100000	100001
40.95	0	12.0785	0	28.2603	20.8659	33.1119	27.4379	1.4247e-09	0	19.3159	100002	100000	100001
41	0	12.0785	0	28.2603	20.8659	33.1119	27.4379	1.36078e-09	0	19.3159	100002	100000	100001
41.05	0	12.0785	0	28.2603	20.8659	33.1119	27.4379	1.29962e-09	0	19.3159	100002	100000	100001
41.1	0	12.0785	0	28.2603	20.8659	33.1119	27.4379	1.24105e-09	0	19.3159	100002	100000	100001
41.15	0	12.0785	0	28.2603	20.8659	33.1119	27.4379	1.18485e-09	0	19.3159	100002	100000	100001
41.2	0	12.0785	0	28.2603	20.8659	33.1119	27.4379	1.13141e-09	0	19.3159	100002	100000	100001
41.25	0	12.0785	0	28.2603	20.8659	33.1119	27.4379	1.08047e-09	0	19.3159	100002	100000	100001
41.3	0	12.0785	0	28.2603	20.8659	33.1119	27.4379	1.0318e-09	0	19.3159	100002	100000	100001
41.35	0	12.0785	0	28.2603	20.8659	33.1119	27.4379	9.8527e-10	0	19.3159	100002	100000	100001
41.4	0	12.0785	0	28.2603	20.8659	33.1119	27.4379	9.40785e-10	0	19.3159	100002	100000	100001
41.45	0	12.0785	0	28.2603	20.8659	33.1119	27.4379	8.98239e-10	0	19.3159	100002	100000	100001
41.5	0	12.0785	0	28.2603	20.8659	33.1119	27.4379	8.5753e-10	0	19.3159	100002	100000	100001
41.55	0	12.0785	0	28.2603	20.8659	33.1119	27.4379	8.18568e-10	0	19.3159	100002	100000	100001
41.6	0	12.0785	0	28.2603	20.8659	33.1119	27.4379	7.81447e-10	0	19.3159	100002	100000	100001
41.65	0	12.0785	0	28.2603	20.8659	33.1119	27.4379	7.45983e-10	0	19.3159	100002	100000	100001
41.7	0	12.0785	0	28.2603	20.8659	33.1119	27.4379	7.12106e-10	0	19.3159	100002	100000	100001
41.75	0	12.0785	0	28.2603	20.8659	33.1119	27.4379	6.79755e-10	0	19.3159	100002	100000	100001
41.8	0	12.0785	0	28.2603	20.8659	33.1119	27.4379	6.48867e-10	0	19.3159	100002	100000	100001
41.85	0	12.0785	0	28.2603	20.8659	33.1119	27.4379	6.19387e-10	0	19.3159	100002	100000	100001
41.9	0	12.0785	0	28.2603	20.8659	33.1119	27.4379	5.91262e-10	0	19.3159	100002	100000	100001
41.95	0	12.0785	0	28.2603	20.8659	33.1119	27.4379	5.64421e-10	0	19.3159	100002	100000	100001
42	0	12.0785	0	28.2603	20.8659	33.1119	27.4379	5.3878e-10	0	19.3159	100002	100000	100001
42.05	0	12.0785	0	28.2603	20.8659	33.1119	27.4379	5.1431e-10	0	19.3159	100002	100000	100001
42.1	0	12.0785	0	28.2603	20.8659	33.1119	27.4379	4.9096e-10	0	19.3159	100002	100000	100001
42.15	0	12.0785	0	28.2603	20.8659	33.1119	27.4379	4.68676e-10	0	19.3159	100002	100000	100001
42.2	0	12.0785	0	28.2603	20.8659	33.1119	27.4379	4.47405e-10	0	19.3159	100002	100000	100001
42.25	0	12.0785	0	28.2603	20.8659	33.1119	27.4379	4.27096e-10	0	19.3159	100002	100000	100001
42.3	0	12.0785	0	28.2603	20.8659	33.1119	27.4379	4.07696e-10	0	19.3159	100002	100000	100001
42.35	0	12.0785	0	28.2603	20.8659	33.1119	27.4379	3.89225e-10	0	19.3159	100002	100000	100001
42.4	0	12.0785	0	28.2603	20.8659	33.1119	27.4379	3.7165e-10	0	19.3159	100002	100000	100001
42.45	0	12.0785	0	28.2603	20.8659	33.1119	27.4379	3.54899e-10	0	19.3159	100002	100000	100001
42.5	0	12.0785	0	28.2603	20.8659	33.1119	27.4379	3.38935e-10	0	19.3159	100002	100000	100001
42.55	0	12.0785	0	28.2603	20.8659	33.1119	27.4379	3.23719e-10	0	19.3159	100002	100000	100001
42.6	0	12.0785	0	28.2603	20.8659	33.1119	27.4379	3.09213e-10	0	19.3159	100002	100000	100001
42.65	0	12.0785	0	28.2603	20.8659	33.1119	27.4379	2.95379e-10	0	19.3159	100002	100000	100001
42.7	0	12.0785	0	28.2603	20.8659	33.1119	27.4379	2.8218e-10	0	19.3159	100002	100000	100001
42.75	0	12.0785	0	28.2603	20.8659	33.1119	27.4379	2.69616e-10	0	19.3159	100002	100000	100001
42.8	0	12.0785	0	28.2603	20.8659	33.1119	27.4379	2.57634e-10	0	19.3159	100002	100000	100001
42.85	0	12.0785	0	28.2603	20.8659	33.1119	27.4379	2.46199e-10	0	19.3159	100002	100000	100001
42.9	0	12.0785	0	28.2603	20.8659	33.1119	27.4379	2.35276e-10	0	19.3159	100002	100000	100001
42.95	0	12.0785	0	28.2603	20.8659	33.1119	27.4379	2.24832e-10	0	19.3159	100002	100000	100001
43	0	12.0785	0	28.2603	20.8659	33.1119	27.4379	2.14833e-10	0	19.3159	100002	100000	100001
43.05	0	12.0785	0	28.2603	20.8659	33.1119	27.4379	2.05243e-10	0	19.3159	100002	100000	100001
43.1	0	12.0785	0	28.2603	20.8659	33.1119	27.4379	1.96055e-10	0	19.3159	100002	100000	100001
43.15	0	12.0785	0	28.2603	20.8659	33.1119	27.4379	1.8735e-10	0	19.3159	100002	100000	100001
43.2	0	12.0785	0	28.2603	20.8659	33.1119	27.4379	1.79034e-10	0	19.3159	100002	100000	100001
43.25	0	12.0785	0	28.2603	20.8659	33.1119	27.4379	1.71091e-10	0	19.3159	100002	100000	100001
43.3	0	12.0785	0	28.2603	20.8659	33.1119	27.4379	1.63508e-10	0	19.3159	100002	100000	100001
43.35	0	12.0785	0	28.2603	20.8659	33.1119	27.4379	1.56271e-10	0	19.3159	100002	100000	100001
43.4	0	12.0785	0	28.2603	20.8659	33.1119	27.4379	1.4937e-10	0	19.3159	100002	100000	100001
43.45	0	12.0785	0	28.2603	20.8659	33.1119	27.4379	1.42797e-10	0	19.3159	100002	100000	100001
43.5	0	12.0785	0	28.2603	20.8659	33.1119	27.4379	1.36501e-10	0	19.3159	100002	100000	100001
43.55	0	12.0785	0	28.2603	20.8659	33.1119	27.4379	1.30441e-10	0	19.3159	100002	100000	100001
43.6	0	12.0785	0	28.2603	20.8659	33.1119	27.4379	1.24633e-10	0	19.3159	100002	100000	100001
43.65	0	12.0785	0	28.2603	20.8659	33.1119	27.4379	1.19063e-10	0	19.3159	100002	100000	100001
43.7	0	12.0785	0	28.2603	20.8659	33.1119	27.4379	1.13714e-10	0	19.3159	100002	100000	100001
43.75	0	12.0785	0	28.2603	20.8659	33.1119	27.4379	1.0857e-10	0	19.3159	100002	100000	100001
43.8	0	12.0785	0	28.2603	20.8659	33.1119	27.4379	1.03615e-10	0	19.3159	100002	100000	100001
43.85	0	12.0785	0	28.2603	20.8659	33.1119	27.4379	9.88343e-11	0	19.3159	100002	100000	100001
43.9	0	12.0785	0	28.2603	20.8659	33.1119	27.4379	9.42961e-11	0	19.3159	100002	100000	100001
43.95	0	12.0785	0	28.2603	20.8659	33.1119	27.4379	8.99735e-11	0	19.3159	100002	100000	100001
44	0	12.0785	0	28.2603	20.8659	33.1119	27.4379	8.58481e-11	0	19.3159	100002	100000	100001
44.05	0	12.0785	0	28.2603	20.8659	33.1119	27.4379	8.19196e-11	0	19.3159	100002	100000	100001
44.1	0	12.0785	0	28.2603	20.8659	33.1119	27.4379	7.81897e-11	0	19.3159	100002	100000	100001
44.15	0	12.0785	0	28.2603	20.8659	33.1119	27.4379	7.46619e-11	0	19.3159	100002	100000	100001
44.2	0	12.0785	0	28.2603	20.8659	33.1119	27.4379	7.13412e-11	0	19.3159	100002	100000	100001
44.25	0	12.0785	0	28.2603	20.8659	33.1119	27.4379	6.82243e-11	0	19.3159	100002	100000	100001
44.3	0	12.0785	0	28.2603	20.8659	33.1119	27.4379	6.51833e-11	0	19.3159	100002	100000	100001
44.35	0	12.0785	0	28.2603	20.8659	33.1119	27.4379	6.22924e-11	0	19.3159	100002	100000	100001
44.4	0	12.0785	0	28.2603	20.8659	33.1119	27.4379	5.95429e-11	0	19.3159	100002	100000	100001
44.45	0	12.0785	0	28.2603	20.8659	33.1119	27.4379	5.69249e-11	0	19.3159	100002	100000	100001
44.5	0	12.0785	0	28.2603	20.8659	33.1119	27.4379	5.44278e-11	0	19.3159	100002	100000	100001
44.55	0	12.0785	0	28.2603	20.8659	33.1119	27.4379	5.20395e-11	0	19.3159	100002	100000	100001
44.6	0	12.0785	0	28.2603	20.8659	33.1119	27.4379	4.97471e-11	0	19.3159	100002	100000	100001
44.65	0	12.0785	0	28.2603	20.8659	33.1119	27.4379	4.75644e-11	0	19.3159	100002	100000	100001
44.7	0	12.0785	0	28.2603	20.8659	33.1119	27.4379	4.55248e-11	0	19.3159	100002	100000	100001
44.75	0	12.0785	0	28.2603	20.8659	33.1119	27.4379	4.35856e-11	0	19.3159	100002	100000	100001
44.8	0	12.0785	0	28.2603	20.8659	33.1119	27.4379	4.17405e-11	0	19.3159	100002	100000	100001
44.85	0	12.0785	0	28.2603	20.8659	33.1119	27.4379	3.99833e-11	0	19.3159	100002	100000	100001
44.9	0	12.0785	0	28.2603	20.8659	33.1119	27.4379	3.83073e-11	0	19.3159	100002	100000	100001
44.95	0	12.0785	0	28.2603	20.8659	33.1119	27.4379	3.67059e-11	0	19.3159	100002	100000	100001
45	0	12.0785	0	28.2603	20.8659	33.1119	27.4379	3.51721e-11	0	19.3159	100002	100000	100001
45.05	0	12.0785	0	28.2603	20.8659	33.1119	27.4379	3.3709e-11	0	19.3159	100002	100000	100001
45.1	0	12.0785	0	28.2603	20.8659	33.1119	27.4379	3.23112e-11	0	19.3159	100002	100000	100001
45.15	0	12.0785	0	28.2603	20.8659	33.1119	27.4379	3.09694e-11	0	19.3159	100002	100000	100001
45.2	0	12.0785	0	28.2603	20.8659	33.1119	27.4379	2.96781e-11	0	19.3159	100002	100000	100001
45.25	0	12.0785	0	28.2603	20.8659	33.1119	27.4379	2.84321e-11	0	19.3159	100002	100000	100001
45.3	0	12.0785	0	28.2603	20.8659	33.1119	27.4379	2.7226e-11	0	19.3159	100002	100000	100001
45.35	0	12.0785	0	28.2603	20.8659	33.1119	27.4379	2.60543e-11	0	19.3159	100002	100000	100001
45.4	0	12.0785	0	28.2603	20.8659	33.1119	27.4379	2.49117e-11	0	19.3159	100002	100000	100001
45.45	0	12.0785	0	28.2603	20.8659	33.1119	27.4379	2.38618e-11	0	19.3159	100002	100000	100001
45.5	0	12.0785	0	28.2603	20.8659	33.1119	27.4379	2.28588e-11	0	19.3159	100002	100000	100001
45.55	0	12.0785	0	28.2603	20.8659	33.1119	27.4379	2.18972e-11	0	19.3159	100002	100000	100001
45.6	0	12.0785	0	28.2603	20.8659	33.1119	27.4379	2.09743e-11	0	19.3159	100002	100000	100001
45.65	0	12.0785	0	28.2603	20.8659	33.1119	27.4379	2.00873e-11	0	19.3159	100002	100000	100001
45.7	0	12.0785	0	28.2603	20.8659	33.1119	27.4379	1.92334e-11	0	19.3159	100002	100000	100001
45.75	0	12.0785	0	28.2603	20.8659	33.1119	27.4379	1.84097e-11	0	19.3159	100002	100000	100001
45.8	0	12.0785	0	28.2603	20.8659	33.1119	27.4379	1.76134e-11	0	19.3159	100002	100000	100001
45.85	0	12.0785	0	28.2603	20.8659	33.1119	27.4379	1.68414e-11	0	19.3159	100002	100000	100001
45.9	0	12.0785	0	28.2603	20.8659	33.1119	27.4379	1.60909e-11	0	19.3159	100002	100000	100001
45.95	0	12.0785	0	28.2603	20.8659	33.1119	27.4379	1.53587e-11	0	19.3159	100002	100000	100001
46	0	12.0785	0	28.2603	20.8659	33.1119	27.4379	1.46417e-11	0	19.3159	100002	100000	100001
46.05	0	12.0785	0	28.2603	20.8659	33.1119	27.4379	1.39369e-11	0	19.3159	100002	100000	100001
46.1	0	12.0785	0	28.2603	20.8659	33.1119	27.4379	1.3241e-11	0	19.3159	100002	100000	100001
46.15	0	12.0785	0	28.2603	20.8659	33.1119	27.4379	1.25509e-11	0	19.3159	100002	100000	100001
46.2	0	12.0785	0	28.2603	20.8659	33.1119	27.4379	1.18632e-11	0	19.3159	100002	100000	100001
46.25	0	12.0785	0	28.2603	20.8659	33.1119	27.4379	1.11879e-11	0	19.3159	100002	100000	100001
46.3	0	12.0785	0	28.2603	20.8659	33.1119	27.4379	1.06163e-11	0	19.3159	100002	100000	100001
46.35	0	12.0785	0	28.2603	20.8659	33.1119	27.4379	1.00636e-11	0	19.3159	100002	100000	100001
46.4	0	12.0785	0	28.2603	20.8659	33.1119	27.4379	9.52877e-12	0	19.3159	100002	100000	100001
46.45	0	12.0785	0	28.2603	20.8659	33.1119	27.4379	9.01097e-12	0	19.3159	100002	100000	100001
46.5	0	12.0785	0	28.2603	20.8659	33.1119	27.4379	8.50926e-12	0	19.3159	100002	100000	100001
46.55	0	12.0785	0	28.2603	20.8659	33.1119	27.4379	8.02275e-12	0	19.3159	100002	100000	100001
46.6	0	12.0785	0	28.2603	20.8659	33.1119	27.4379	7.55059e-12	0	19.3159	100002	100000	100001
46.65	0	12.0785	0	28.2603	20.8659	33.1119	27.4379	7.09195e-12	0	19.3159	100002	100000	100001
46.7	0	12.0785	0	28.2603	20.8659	33.1119	27.4379	6.64606e-12	0	19.3159	100002	100000	100001
46.75	0	12.0785	0	28.2603	20.8659	33.1119	27.4379	6.21217e-12	0	19.3159	100002	100000	100001
46.8	0	12.0785	0	28.2603	20.8659	33.1119	27.4379	5.78955e-12	0	19.3159	100002	100000	100001
46.85	0	12.0785	0	28.2603	20.8659	33.1119	27.4379	5.37751e-12	0	19.3159	100002	100000	100001
46.9	0	12.0785	0	28.2603	20.8659	33.1119	27.4379	4.97541e-12	0	19.3159	100002	100000	100001
46.95	0	12.0785	0	28.2603	20.8659	33.1119	27.4379	4.58263e-12	0	19.3159	100002	100000	100001
47	0	12.0785	0	28.2603	20.8659	33.1119	27.4379	4.19856e-12	0	19.3159	100002	100000	100001
47.05	0	12.0785	0	28.2603	20.8659	33.1119	27.4379	3.82266e-12	0	19.3159	100002	100000	100001
47.1	0	12.0785	0	28.2603	20.8659	33.1119	27.4379	3.468e-12	0	19.3159	100002	100000	100001
47.15	0	12.0785	0	28.2603	20.8659	33.1119	27.4379	3.15968e-12	0	19.3159	100002	100000	100001
47.2	0	12.0785	0	28.2603	20.8659	33.1119	27.4379	2.86904e-12	0	19.3159	100002	100000	100001
47.25	0	12.0785	0	28.2603	20.8659	33.1119	27.4379	2.59669e-12	0	19.3159	100002	100000	100001
47.3	0	12.0785	0	28.2603	20.8659	33.1119	27.4379	2.34328e-12	0	19.3159	100002	100000	100001
47.35	0	12.0785	0	28.2603	20.8659	33.1119	27.4379	2.10954e-12	0	19.3159	100002	100000	100001
47.4	0	12.0785	0	28.2603	20.8659	33.1119	27.4379	1.89626e-12	0	19.3159	100002	100000	100001
47.45	0	12.0785	0	28.2603	20.8659	33.1119	27.4379	1.70433e-12	0	19.3159	100002	100000	100001
47.5	0	12.0785	0	28.2603	20.8659	33.1119	27.4379	1.53467e-12	0	19.3159	100002	100000	100001
47.55	0	12.0785	0	28.2603	20.8659	33.1119	27.4379	1.38829e-12	0	19.3159	100002	100000	100001
47.6	0	12.0785	0	28.2603	20.8659	33.1119	27.4379	1.26628e-12	0	19.3159	100002	100000	100001
47.65	0	12.0785	0	28.2603	20.8659	33.1119	27.4379	1.16979e-12	0	19.3159	100002	100000	100001
47.7	0	12.0785	0	28.2603	20.8659	33.1119	27.4379	1.10003e-12	0	19.3159	100002	100000	100001
47.75	0	12.0785	0	28.2603	20.8659	33.1119	27.4379	1.0583e-12	0	19.3159	100002	100000	100001
47.8	0	12.0785	0	28.2603	20.8659	33.1119	27.4379	1.04596e-12	0	19.3159	100002	100000	100001
47.85	0	12.0785	0	28.2603	20.8659	33.1119	27.4379	1.06443e-12	0	19.3159	100002	100000	100001
47.9	0	12.0785	0	28.2603	20.8659	33.1119	27.4379	1.11523e-12	0	19.3159	100002	100000	100001
47.95	0	12.0785	0	28.2603	20.8659	33.1119	27.4379	1.14927e-12	0	19.3159	100002	100000	100001
48	0	12.0785	0	28.2603	20.8659	33.1119	27.4379	1.14303e-12	0	19.3159	100002	100000	100001
48.05	0	12.0785	0	28.2603	20.8659	33.1119	27.4379	1.14815e-12	0	19.3159	100002	100000	100001

## Sheet: BH14
Time	RI	FP	BH	fructose	formate	acetate	butyrate	unknown compound	H20	CO2	lag_RI	lag_FP	lag_BH
0.05	0	0	0.0850532	49.9111	47.5486	1.23233	0	30	0.0153873	0.00666308	0.103873	0.112734	0.0110518
0.1	0	0	0.0850915	49.9111	47.5485	1.23235	0	30	0.0154256	0.00669754	0.107896	0.127088	0.0122141
0.15	0	0	0.0851338	49.911	47.5484	1.23238	0	30	0.0154679	0.00673561	0.112075	0.14327	0.0134987
0.2	0	0	0.0851805	49.9109	47.5483	1.2324	0	30	0.0155146	0.00677764	0.116416	0.161513	0.0149184
0.25	0	0	0.085232	49.9109	47.5482	1.23243	0	30	0.0155662	0.00682405	0.120925	0.182079	0.0164874
0.3	0	0	0.085289	49.9108	47.548	1.23247	0	30	0.0156231	0.00687529	0.125609	0.205263	0.0182214
0.35	0	0	0.0853518	49.9107	47.5479	1.23251	0	30	0.015686	0.00693186	0.130474	0.231399	0.0201378
0.4	0	0	0.0854212	49.9106	47.5477	1.23255	0	30	0.0157554	0.00699431	0.135527	0.260863	0.0222557
0.45	0	0	0.0854978	49.9105	47.5475	1.23259	0	30	0.015832	0.00706322	0.140776	0.294078	0.0245964
0.5	0	0	0.0855823	49.9103	47.5473	1.23264	0	30	0.0159165	0.00713928	0.146229	0.331523	0.0271832
0.55	0	0	0.0856755	49.9102	47.5471	1.2327	0	30	0.0160097	0.0072232	0.151892	0.373736	0.0300421
0.6	0	0	0.0857784	49.91	47.5468	1.23276	0	30	0.0161126	0.00731578	0.157775	0.421325	0.0332017
0.65	0	0	0.0858919	49.9099	47.5466	1.23283	0	30	0.016226	0.0074179	0.163886	0.474972	0.0366936
0.7	0	0	0.086017	49.9097	47.5463	1.23291	0	30	0.0163512	0.00753051	0.170233	0.535449	0.0405527
0.75	0	0	0.086155	49.9095	47.5459	1.23299	0	30	0.0164891	0.00765467	0.176827	0.603627	0.0448177
0.8	0	0	0.086307	49.9092	47.5455	1.23308	0	30	0.0166412	0.00779153	0.183676	0.680485	0.0495312
0.85	0	0	0.0864746	49.909	47.5451	1.23318	0	30	0.0168088	0.00794234	0.19079	0.76713	0.0547405
0.9	0	0	0.0866592	49.9087	47.5447	1.23329	0	30	0.0169934	0.00810849	0.198179	0.864807	0.0604976
0.95	0	0	0.0868625	49.9084	47.5442	1.23341	0	30	0.0171967	0.00829148	0.205855	0.974921	0.0668602
1	0	0	0.0870864	49.908	47.5436	1.23355	0	30	0.0174205	0.00849294	0.213828	1.09906	0.0738919
1.05	0	0	0.0873327	49.9077	47.543	1.23369	0	30	0.0176669	0.00871466	0.22211	1.239	0.0816632
1.1	0	0	0.0876037	49.9072	47.5424	1.23386	0	30	0.0179379	0.00895857	0.230712	1.39676	0.0902518
1.15	0	0	0.0879017	49.9068	47.5416	1.23404	0	30	0.0182359	0.00922677	0.239648	1.5746	0.0997437
1.2	0	0	0.0882293	49.9063	47.5408	1.23423	0	30	0.0185634	0.00952154	0.24893	1.77509	0.110234
1.25	0	0	0.088589	49.9057	47.5399	1.23445	0	30	0.0189232	0.00984535	0.258571	2.00111	0.121827
1.3	0	0	0.088984	49.9051	47.539	1.23469	0	30	0.0193182	0.0102008	0.268586	2.25591	0.13464
1.35	0	0	0.0894174	49.9045	47.5379	1.23495	0	30	0.0197516	0.0105909	0.278989	2.54315	0.1488
1.4	0	0	0.0898926	49.9037	47.5368	1.23523	0	30	0.0202268	0.0110186	0.289794	2.86696	0.16445
1.45	0	0	0.0904133	49.9029	47.5355	1.23554	0	30	0.0207475	0.0114872	0.301018	3.23201	0.181745
1.5	0	0	0.0909834	49.9021	47.5341	1.23589	0	30	0.0213175	0.0120002	0.312677	3.64353	0.200859
1.55	0	0	0.091607	49.9011	47.5326	1.23626	0	30	0.0219411	0.0125615	0.324787	4.10745	0.221984
1.6	0	0	0.0922886	49.9001	47.5309	1.23667	0	30	0.0226227	0.0131749	0.337367	4.63045	0.24533
1.65	0	0	0.0930329	49.8989	47.5291	1.23712	0	30	0.023367	0.0138448	0.350433	5.22003	0.271132
1.7	0	0	0.0938448	49.8977	47.5271	1.2376	0	30	0.024179	0.0145755	0.364006	5.88469	0.299647
1.75	0	0	0.0947296	49.8963	47.5249	1.23813	0	30	0.0250638	0.0153719	0.378105	6.63397	0.331161
1.8	0	0	0.0956927	49.8949	47.5225	1.23871	0	30	0.0260269	0.0162387	0.392749	7.47866	0.365989
1.85	0	0	0.0967399	49.8933	47.52	1.23934	0	30	0.027074	0.0171811	0.407961	8.43091	0.404481
1.9	0	0	0.097877	49.8915	47.5172	1.24002	0	30	0.0282112	0.0182045	0.423762	9.5044	0.447021
1.95	0	0	0.0991103	49.8896	47.5142	1.24076	0	30	0.0294444	0.0193144	0.440174	10.7146	0.494034
2	0	0	0.100446	49.8876	47.5109	1.24156	0	30	0.0307802	0.0205166	0.457223	12.0788	0.545992
2.05	0	0	0.101891	49.8854	47.5073	1.24243	0	30	0.0322249	0.0218169	0.474932	13.6168	0.603415
2.1	0	0	0.103451	49.883	47.5035	1.24337	0	30	0.0337854	0.0232213	0.493326	15.3506	0.666877
2.15	0	0	0.105134	49.8804	47.4994	1.24438	0	30	0.0354684	0.024736	0.512433	17.3052	0.737013
2.2	0	0	0.106947	49.8777	47.495	1.24546	0	30	0.0372809	0.0263672	0.532281	19.5086	0.814525
2.25	0	0	0.108896	49.8747	47.4902	1.24663	0	30	0.0392298	0.0281213	0.552897	21.9926	0.90019
2.3	0	0	0.110988	49.8715	47.485	1.24789	0	30	0.0413224	0.0300046	0.574311	24.7929	0.994863
2.35	0	0	0.113232	49.868	47.4796	1.24923	0	30	0.0435658	0.0320237	0.596555	27.9497	1.09949
2.4	0	0	0.115633	49.8644	47.4737	1.25068	0	30	0.0459671	0.0341848	0.61966	31.5085	1.21513
2.45	0	0	0.118199	49.8604	47.4674	1.25221	0	30	0.0485336	0.0364947	0.64366	35.5204	1.34293
2.5	0	0	0.120938	49.8563	47.4607	1.25386	0	30	0.0512725	0.0389597	0.66859	40.0431	1.48416
2.55	0	0	0.123857	49.8518	47.4535	1.25561	0	30	0.0541911	0.0415864	0.694485	45.1417	1.64025
2.6	0	0	0.126962	49.847	47.4459	1.25747	0	30	0.0572966	0.0443814	0.721384	50.8895	1.81276
2.65	0	0	0.130262	49.842	47.4378	1.25945	0	30	0.0605963	0.0473511	0.749324	57.3692	2.00341
2.7	0	0	0.133763	49.8366	47.4292	1.26155	0	30	0.0640975	0.0505022	0.778346	64.6739	2.21411
2.75	0	0	0.137473	49.831	47.4201	1.26378	0	30	0.0678076	0.0538413	0.808492	72.9087	2.44697
2.8	0	0	0.1414	49.8249	47.4105	1.26614	0	30	0.0717339	0.057375	0.839806	82.192	2.70432
2.85	0	0	0.14555	49.8186	47.4004	1.26863	0	30	0.0758839	0.06111	0.872333	92.6573	2.98874
2.9	0	0	0.149931	49.8119	47.3896	1.27125	0	30	0.0802652	0.0650531	0.906119	104.455	3.30307
2.95	0	0	0.154551	49.8048	47.3783	1.27403	0	30	0.0848854	0.0692113	0.941214	117.755	3.65045
3	0	0	0.159418	49.7974	47.3664	1.27695	0	30	0.0897524	0.0735916	0.977669	132.749	4.03437
3.05	0	0	0.16454	49.7895	47.3538	1.28002	0	30	0.0948741	0.0782011	1.01554	149.651	4.45867
3.1	0	0	0.169925	49.7813	47.3407	1.28325	0	30	0.100259	0.0830473	1.05487	168.706	4.9276
3.15	0	0	0.175581	49.7726	47.3268	1.28664	0	30	0.105915	0.0881377	1.09572	190.187	5.44584
3.2	0	0	0.181517	49.7636	47.3123	1.29021	0	30	0.111851	0.0934802	1.13816	214.403	6.01858
3.25	0	0	0.187742	49.754	47.297	1.29394	0	30	0.118076	0.0990828	1.18225	241.703	6.65156
3.3	0	0	0.194265	49.744	47.281	1.29785	0	30	0.124599	0.104954	1.22804	272.478	7.35111
3.35	0	0	0.201096	49.7336	47.2643	1.30195	0	30	0.131431	0.111102	1.2756	307.172	8.12424
3.4	0	0	0.208245	49.7226	47.2468	1.30624	0	30	0.13858	0.117536	1.325	346.284	8.97867
3.45	0	0	0.215723	49.7112	47.2285	1.31073	0	30	0.146057	0.124266	1.37632	390.376	9.92297
3.5	0	0	0.223539	49.6992	47.2094	1.31542	0	30	0.153873	0.131301	1.42963	440.082	10.9666
3.55	0	0	0.231706	49.6867	47.1894	1.32032	0	30	0.16204	0.138651	1.485	496.116	12.1199
3.6	0	0	0.240234	49.6737	47.1685	1.32544	0	30	0.170569	0.146326	1.54252	559.286	13.3946
3.65	0	0	0.249137	49.66	47.1467	1.33078	0	30	0.179471	0.154339	1.60226	630.498	14.8033
3.7	0	0	0.258427	49.6458	47.124	1.33635	0	30	0.188761	0.162699	1.66432	710.778	16.3602
3.75	0	0	0.268116	49.631	47.1002	1.34216	0	30	0.19845	0.17142	1.72878	801.28	18.0808
3.8	0	0	0.278219	49.6155	47.0755	1.34823	0	30	0.208554	0.180513	1.79574	903.306	19.9824
3.85	0	0	0.288751	49.5994	47.0497	1.35455	0	30	0.219085	0.189991	1.86529	1018.32	22.084
3.9	0	0	0.299725	49.5826	47.0229	1.36113	0	30	0.230059	0.199868	1.93753	1147.98	24.4066
3.95	0	0	0.311158	49.565	46.9949	1.36799	0	30	0.241492	0.210157	2.01258	1294.15	26.9734
4	0	0	0.323066	49.5468	46.9658	1.37513	0	30	0.2534	0.220874	2.09053	1458.93	29.8103
4.05	0	0	0.335465	49.5278	46.9355	1.38257	0	30	0.265799	0.232033	2.17149	1644.7	32.9454
4.1	0	0	0.348373	49.508	46.9039	1.39032	0	30	0.278707	0.243651	2.2556	1854.11	36.4103
4.15	0	0	0.361809	49.4874	46.871	1.39838	0	30	0.292143	0.255743	2.34296	2090.19	40.2397
4.2	0	0	0.37579	49.466	46.8369	1.40677	0	30	0.306124	0.268326	2.43371	2356.33	44.4717
4.25	0	0	0.390338	49.4437	46.8013	1.4155	0	30	0.320672	0.281419	2.52797	2656.36	49.1488
4.3	0	0	0.405472	49.4205	46.7643	1.42458	0	30	0.335806	0.29504	2.62588	2994.59	54.3179
4.35	0	0	0.421213	49.3963	46.7258	1.43402	0	30	0.351547	0.309207	2.72758	3375.88	60.0305
4.4	0	0	0.437584	49.3712	46.6858	1.44385	0	30	0.367918	0.323941	2.83323	3805.73	66.344
4.45	0	0	0.454607	49.3451	46.6442	1.45406	0	30	0.384941	0.339262	2.94296	4290.3	73.3215
4.5	0	0	0.472306	49.318	46.601	1.46468	0	30	0.402641	0.355191	3.05694	4836.58	81.0328
4.55	0	0	0.490706	49.2897	46.556	1.47572	0	30	0.42104	0.371751	3.17534	5452.41	89.5551
4.6	0	0	0.509832	49.2604	46.5093	1.48719	0	30	0.440166	0.388964	3.29833	6146.66	98.9737
4.65	0	0	0.529711	49.2299	46.4608	1.49912	0	30	0.460045	0.406855	3.42608	6929.3	109.383
4.7	0	0	0.550369	49.1982	46.4103	1.51152	0	30	0.480703	0.425447	3.55877	7811.59	120.887
4.75	0	0	0.571835	49.1652	46.3579	1.5244	0	30	0.502169	0.444767	3.69661	8806.22	133.6
4.8	0	0	0.594139	49.1309	46.3035	1.53778	0	30	0.524473	0.46484	3.83978	9927.5	147.651
4.85	0	0	0.61731	49.0953	46.247	1.55168	0	30	0.547645	0.485695	3.9885	11191.6	163.18
4.9	0	0	0.641381	49.0584	46.1883	1.56612	0	30	0.571715	0.507358	4.14298	12616.5	180.342
4.95	0	0	0.666383	49.0199	46.1273	1.58113	0	30	0.596717	0.52986	4.30344	14223	199.309
5	0	0	0.69235	48.98	46.064	1.59671	0	30	0.622684	0.55323	4.47012	16034	220.27
5.05	0	0	0.719317	48.9386	45.9982	1.61289	0	30	0.649651	0.5775	4.64326	18075.5	243.436
5.1	0	0	0.747319	48.8955	45.93	1.62969	0	30	0.677653	0.602702	4.82309	20377.1	269.039
5.15	0	0	0.776393	48.8508	45.8591	1.64713	0	30	0.706727	0.628869	5.0099	22971.6	297.334
5.2	0	0	0.806578	48.8044	45.7856	1.66524	0	30	0.736912	0.656035	5.20394	25896.6	328.604
5.25	0	0	0.837913	48.7561	45.7093	1.68404	0	30	0.768247	0.684237	5.40549	29193.9	363.164
5.3	0	0	0.870437	48.7061	45.6301	1.70356	0	30	0.800772	0.713509	5.61485	32911.1	401.358
5.35	0	0	0.904194	48.6541	45.548	1.72381	0	30	0.834528	0.74389	5.83232	37101.6	443.57
5.4	0	0	0.939226	48.6001	45.4628	1.74483	0	30	0.869561	0.775419	6.05822	41825.7	490.22
5.45	0	0	0.975578	48.5441	45.3744	1.76664	0	30	0.905912	0.808135	6.29286	47151.3	541.777
5.5	0	0	1.01329	48.486	45.2827	1.78927	0	30	0.943629	0.84208	6.53659	53155	598.757
5.55	0	0	1.05242	48.4257	45.1876	1.81275	0	30	0.982757	0.877296	6.78976	59923.1	661.728
5.6	0	0	1.09301	48.3631	45.089	1.8371	0	30	1.02335	0.913826	7.05274	67552.9	731.323
5.65	0	0	1.13511	48.2981	44.9867	1.86236	0	30	1.06545	0.951715	7.3259	76154.3	808.237
5.7	0	0	1.17877	48.2307	44.8807	1.88856	0	30	1.1091	0.991009	7.60964	85850.9	893.24
5.75	0	0	1.22404	48.1608	44.7709	1.91572	0	30	1.15438	1.03175	7.90437	96782.1	987.183
5.8	0	0	1.27098	48.0883	44.657	1.94389	0	30	1.20132	1.074	8.21052	100004	1091.01
5.85	0	0	1.31965	48.0131	44.5391	1.97308	0	30	1.24998	1.1178	8.52852	100004	1205.75
5.9	0	0	1.37009	47.9351	44.4168	2.00335	0	30	1.30042	1.16319	8.85884	100004	1332.57
5.95	0	0	1.42236	47.8543	44.2902	2.03471	0	30	1.3527	1.21024	9.20196	100004	1472.72
6	0	0	1.47653	47.7704	44.1591	2.06721	0	30	1.40687	1.25899	9.55836	100004	1627.62
6.05	0	0	1.53266	47.6835	44.0233	2.10089	0	30	1.46299	1.30951	9.92857	100004	1798.81
6.1	0	0	1.5908	47.5934	43.8827	2.13578	0	30	1.52114	1.36184	10.3131	100004	1988
6.15	0	0	1.65103	47.5001	43.7371	2.17191	0	30	1.58136	1.41604	10.7126	100004	2197.09
6.2	0	0	1.7134	47.4034	43.5865	2.20933	0	30	1.64373	1.47217	11.1275	100004	2428.18
6.25	0	0	1.77797	47.3032	43.4306	2.24808	0	30	1.70831	1.53029	11.5585	100004	2683.56
6.3	0	0	1.84483	47.1994	43.2694	2.28819	0	30	1.77516	1.59046	12.0061	100004	2965.82
6.35	0	0	1.91403	47.0919	43.1026	2.32971	0	30	1.84436	1.65274	12.4711	100004	3277.75
6.4	0	0	1.98564	46.9805	42.9301	2.37268	0	30	1.91597	1.71719	12.9542	100004	3622.49
6.45	0	0	2.05973	46.8653	42.7517	2.41713	0	30	1.99006	1.78387	13.4559	100004	4003.5
6.5	0	0	2.13638	46.7459	42.5673	2.46312	0	30	2.06671	1.85285	13.9771	100004	4424.58
6.55	0	0	2.21565	46.6224	42.3768	2.51068	0	30	2.14598	1.9242	14.5184	100004	4889.94
6.6	0	0	2.29761	46.4946	42.18	2.55986	0	30	2.22795	1.99797	15.0807	100004	5404.25
6.65	0	0	2.38235	46.3624	41.9767	2.61071	0	30	2.31269	2.07423	15.6648	100004	5972.65
6.7	0	0	2.46993	46.2256	41.7667	2.66325	0	30	2.40027	2.15305	16.2715	100004	6600.84
6.75	0	0	2.56043	46.0842	41.55	2.71755	0	30	2.49076	2.2345	16.9018	100004	7295.1
6.8	0	0	2.65392	45.9379	41.3263	2.77364	0	30	2.58425	2.31864	17.5564	100004	8062.38
6.85	0	0	2.75047	45.7867	41.0955	2.83158	0	30	2.6808	2.40554	18.2364	100004	8910.36
6.9	0	0	2.85016	45.6305	40.8575	2.89139	0	30	2.78049	2.49526	18.9427	100004	9847.52
6.95	0	0	2.95306	45.4691	40.612	2.95313	0	30	2.8834	2.58787	19.6764	100004	10883.3
7	0	0	3.05925	45.3023	40.359	3.01685	0	30	2.98959	2.68344	20.4385	100004	12027.9
7.05	0	0	3.1688	45.1301	40.0984	3.08258	0	30	3.09913	2.78204	21.2301	100004	13293
7.1	0	0	3.28178	44.9522	39.8298	3.15036	0	30	3.21212	2.88372	22.0523	100004	14691.1
7.15	0	0	3.39826	44.7687	39.5533	3.22025	0	30	3.3286	2.98855	22.9065	100004	16236.3
7.2	0	0	3.51832	44.5793	39.2687	3.29229	0	30	3.44865	3.0966	23.7937	100004	17944
7.25	0	0	3.64201	44.3839	38.9759	3.3665	0	30	3.57235	3.20793	24.7152	100004	19831.3
7.3	0	0	3.76942	44.1824	38.6747	3.44294	0	30	3.69975	3.32259	25.6725	100004	21917.1
7.35	0	0	3.90059	43.9746	38.3651	3.52165	0	30	3.83092	3.44065	26.6668	100004	24222.2
7.4	0	0	4.0356	43.7605	38.0469	3.60265	0	30	3.96593	3.56215	27.6996	100004	26769.9
7.45	0	0	4.1745	43.5399	37.7201	3.68599	0	30	4.10483	3.68716	28.7725	100004	29585.5
7.5	0	0	4.31734	43.3127	37.3845	3.7717	0	30	4.24768	3.81573	29.8869	100004	32697.2
7.55	0	0	4.4642	43.0788	37.0402	3.85981	0	30	4.39453	3.94789	31.0445	100004	36136.2
7.6	0	0	4.6151	42.838	36.6869	3.95035	0	30	4.54543	4.0837	32.2468	100004	39936.9
7.65	0	0	4.7701	42.5903	36.3248	4.04335	0	30	4.70043	4.2232	33.4958	100004	44137.3
7.7	0	0	4.92923	42.3355	35.9538	4.13884	0	30	4.85957	4.36643	34.7931	100004	48779.6
7.75	0	0	5.09255	42.0736	35.5737	4.23682	0	30	5.02288	4.51341	36.1407	100004	53910
7.8	0	0	5.26006	41.8044	35.1848	4.33733	0	30	5.1904	4.66417	37.5405	100004	59580.2
7.85	0	0	5.43181	41.5279	34.7868	4.44038	0	30	5.36215	4.81875	38.9945	100004	65846.6
7.9	0	0	5.60781	41.244	34.38	4.54598	0	30	5.53814	4.97714	40.5048	100004	72772.2
7.95	0	0	5.78807	40.9527	33.9643	4.65414	0	30	5.71841	5.13938	42.0736	100004	80426.2
8	0	0	5.9726	40.6538	33.5398	4.76486	0	30	5.90294	5.30546	43.7032	100004	88885.1
8.05	0	0	6.16141	40.3473	33.1066	4.87814	0	30	6.09174	5.47538	45.3959	100004	98233.6
8.1	0	0	6.35448	40.0332	32.6648	4.99398	0	30	6.28481	5.64914	47.1542	100004	100001
8.15	0	0	6.55179	39.7114	32.2145	5.11237	0	30	6.48212	5.82672	48.9806	100004	100001
8.2	0	0	6.75332	39.3819	31.7559	5.23329	0	30	6.68366	6.00811	50.8777	100004	100001
8.25	0	0	6.95905	39.0448	31.2892	5.35672	0	30	6.88938	6.19326	52.8483	100004	100001
8.3	0	0	7.16892	38.7	30.8146	5.48265	0	30	7.09925	6.38214	54.8951	100004	100001
8.35	0	0	7.38289	38.3474	30.3322	5.61103	0	30	7.31323	6.57472	57.0213	100004	100001
8.4	0	0	7.6009	37.9873	29.8424	5.74184	0	30	7.53124	6.77093	59.2299	100004	100001
8.45	0	0	7.82288	37.6195	29.3455	5.87503	0	30	7.75322	6.97071	61.524	100004	100001
8.5	0	0	8.04876	37.2442	28.8416	6.01055	0	30	7.97909	7.174	63.9069	100004	100001
8.55	0	0	8.27844	36.8614	28.3312	6.14836	0	30	8.20877	7.38071	66.3821	100004	100001
8.6	0	0	8.51182	36.4713	27.8146	6.28839	0	30	8.44216	7.59076	68.9531	100004	100001
8.65	0	0	8.7488	36.0738	27.2921	6.43058	0	30	8.67913	7.80404	71.6238	100004	100001
8.7	0	0	8.98926	35.6692	26.7642	6.57485	0	30	8.91959	8.02045	74.3979	100004	100001
8.75	0	0	9.23306	35.2575	26.2313	6.72113	0	30	9.16339	8.23987	77.2794	100004	100001
8.8	0	0	9.48006	34.839	25.6938	6.86933	0	30	9.4104	8.46217	80.2726	100004	100001
8.85	0	0	9.73013	34.4138	25.1522	7.01937	0	30	9.66046	8.68723	83.3817	100004	100001
8.9	0	0	9.98309	33.982	24.607	7.17115	0	30	9.91343	8.9149	86.6112	100004	100001
8.95	0	0	10.2388	33.5439	24.0586	7.32457	0	30	10.1691	9.14502	89.9658	100004	100001
9	0	0	10.497	33.0997	23.5077	7.47951	0	30	10.4274	9.37744	93.4503	100004	100001
9.05	0	0	10.7576	32.6497	22.9548	7.63588	0	30	10.688	9.61199	97.0698	100004	100001
9.1	0	0	11.0204	32.194	22.4003	7.79355	0	30	10.9508	9.84849	100.83	100004	100001
9.15	0	0	11.2852	31.733	21.845	7.9524	0	30	11.2155	10.0868	104.735	100004	100001
9.2	0	0	11.5517	31.2669	21.2893	8.1123	0	30	11.482	10.3266	108.791	100004	100001
9.25	0	0	11.8197	30.796	20.7338	8.27313	0	30	11.7501	10.5679	113.005	100004	100001
9.3	0	0	12.0891	30.3207	20.1792	8.43474	0	30	12.0194	10.8103	117.382	100004	100001
9.35	0	0	12.3595	29.8413	19.626	8.59701	0	30	12.2899	11.0537	121.928	100004	100001
9.4	0	0	12.6308	29.358	19.0749	8.7598	0	30	12.5612	11.2979	126.651	100004	100001
9.45	0	0	12.9028	28.8713	18.5264	8.92295	0	30	12.8331	11.5426	131.556	100004	100001
9.5	0	0	13.1751	28.3815	17.9812	9.08634	0	30	13.1054	11.7877	136.652	100004	100001
9.55	0	0	13.4475	27.8891	17.4398	9.2498	0	30	13.3778	12.0329	141.944	100004	100001
9.6	0	0	13.7198	27.3942	16.9028	9.4132	0	30	13.6502	12.278	147.442	100004	100001
9.65	0	0	13.9918	26.8975	16.3708	9.5764	0	30	13.9222	12.5228	153.153	100004	100001
9.7	0	0	14.2632	26.3992	15.8443	9.73924	0	30	14.1936	12.767	159.085	100004	100001
9.75	0	0	14.5338	25.8997	15.3239	9.90158	0	30	14.4641	13.0105	165.247	100004	100001
9.8	0	0	14.8033	25.3995	14.8101	10.0633	0	30	14.7336	13.2531	171.647	100004	100001
9.85	0	0	15.0715	24.899	14.3034	10.2242	0	30	15.0018	13.4944	178.295	100004	100001
9.9	0	0	15.3381	24.3985	13.8043	10.3842	0	30	15.2685	13.7344	185.201	100004	100001
9.95	0	0	15.603	23.8985	13.3132	10.5431	0	30	15.5333	13.9728	192.374	100004	100001
10	0	0	15.8659	23.3993	12.8306	10.7008	0	30	15.7963	14.2094	199.825	100004	100001
10.05	0	0	16.1266	22.9015	12.3569	10.8573	0	30	16.057	14.4441	207.564	100004	100001
10.1	0	0	16.3849	22.4053	11.8923	11.0122	0	30	16.3152	14.6765	215.604	100004	100001
10.15	0	0	16.6406	21.9112	11.4374	11.1657	0	30	16.5709	14.9067	223.954	100004	100001
10.2	0	0	16.8935	21.4196	10.9923	11.3174	0	30	16.8238	15.1343	232.629	100004	100001
10.25	0	0	17.1434	20.9308	10.5573	11.4673	0	30	17.0738	15.3592	241.639	100004	100001
10.3	0	0	17.3902	20.4452	10.1328	11.6154	0	30	17.3205	15.5813	250.998	100004	100001
10.35	0	0	17.6337	19.9632	9.71881	11.7615	0	30	17.564	15.8004	260.719	100004	100001
10.4	0	0	17.8737	19.4851	9.31564	11.9055	0	30	17.804	16.0164	270.818	100004	100001
10.45	0	0	18.1101	19.0112	8.92339	12.0473	0	30	18.0404	16.2292	281.307	100004	100001
10.5	0	0	18.3427	18.542	8.54217	12.1869	0	30	18.2731	16.4386	292.202	100004	100001
10.55	0	0	18.5715	18.0776	8.17207	12.3242	0	30	18.5019	16.6445	303.52	100004	100001
10.6	0	0	18.7964	17.6184	7.81314	12.4591	0	30	18.7267	16.8469	315.276	100004	100001
10.65	0	0	19.0172	17.1646	7.4654	12.5916	0	30	18.9475	17.0456	327.487	100004	100001
10.7	0	0	19.2339	16.7166	7.12884	12.7216	0	30	19.1642	17.2406	340.171	100004	100001
10.75	0	0	19.4463	16.2745	6.80343	12.8491	0	30	19.3766	17.4318	353.347	100004	100001
10.8	0	0	19.6545	15.8387	6.4891	12.974	0	30	19.5848	17.6191	367.032	100004	100001
10.85	0	0	19.8583	15.4092	6.18576	13.0963	0	30	19.7886	17.8026	381.248	100004	100001
10.9	0	0	20.0577	14.9864	5.89332	13.2159	0	30	19.988	17.982	396.015	100004	100001
10.95	0	0	20.2527	14.5704	5.61163	13.3329	0	30	20.183	18.1576	411.353	100004	100001
11	0	0	20.4433	14.1613	5.34055	13.4473	0	30	20.3736	18.3291	427.285	100004	100001
11.05	0	0	20.6294	13.7593	5.07991	13.5589	0	30	20.5597	18.4966	443.835	100004	100001
11.1	0	0	20.811	13.3646	4.82952	13.6679	0	30	20.7414	18.6601	461.025	100004	100001
11.15	0	0	20.9882	12.9772	4.58918	13.7742	0	30	20.9186	18.8195	478.882	100004	100001
11.2	0	0	21.161	12.5973	4.35868	13.8779	0	30	21.0913	18.975	497.43	100004	100001
11.25	0	0	21.3293	12.225	4.13779	13.9789	0	30	21.2596	19.1265	516.696	100004	100001
11.3	0	0	21.4932	11.8602	3.92628	14.0772	0	30	21.4235	19.274	536.708	100004	100001
11.35	0	0	21.6527	11.503	3.7239	14.1729	0	30	21.583	19.4175	557.496	100004	100001
11.4	0	0	21.8079	11.1536	3.53041	14.266	0	30	21.7382	19.5572	579.088	100004	100001
11.45	0	0	21.9587	10.8119	3.34554	14.3565	0	30	21.8891	19.693	601.517	100004	100001
11.5	0	0	22.1054	10.4779	3.16905	14.4445	0	30	22.0357	19.825	624.815	100004	100001
11.55	0	0	22.2478	10.1516	3.00066	14.53	0	30	22.1781	19.9531	649.015	100004	100001
11.6	0	0	22.3861	9.83308	2.84011	14.613	0	30	22.3164	20.0776	674.152	100004	100001
11.65	0	0	22.5203	9.52221	2.68714	14.6935	0	30	22.4507	20.1984	700.263	100004	100001
11.7	0	0	22.6505	9.21899	2.54147	14.7716	0	30	22.5809	20.3156	727.385	100004	100001
11.75	0	0	22.7768	8.92336	2.40284	14.8474	0	30	22.7071	20.4292	755.557	100004	100001
11.8	0	0	22.8992	8.63528	2.27099	14.9208	0	30	22.8295	20.5394	784.821	100004	100001
11.85	0	0	23.0178	8.35468	2.14566	14.992	0	30	22.9481	20.6461	815.218	100004	100001
11.9	0	0	23.1327	8.08148	2.02659	15.0609	0	30	23.063	20.7495	846.793	100004	100001
11.95	0	0	23.2439	7.8156	1.91353	15.1276	0	30	23.1743	20.8496	879.59	100004	100001
12	0	0	23.3516	7.55695	1.80623	15.1922	0	30	23.2819	20.9465	913.658	100004	100001
12.05	0	0	23.4558	7.30545	1.70445	15.2548	0	30	23.3861	21.0403	949.045	100004	100001
12.1	0	0	23.5566	7.06098	1.60795	15.3152	0	30	23.4869	21.131	985.803	100004	100001
12.15	0	0	23.654	6.82344	1.5165	15.3737	0	30	23.5844	21.2188	1023.98	100004	100001
12.2	0	0	23.7483	6.59272	1.42987	15.4303	0	30	23.6786	21.3036	1063.64	100004	100001
12.25	0	0	23.8394	6.3687	1.34785	15.4849	0	30	23.7697	21.3855	1104.84	100004	100001
12.3	0	0	23.9274	6.15126	1.27022	15.5377	0	30	23.8577	21.4647	1147.63	100004	100001
12.35	0	0	24.0124	5.94029	1.19678	15.5887	0	30	23.9427	21.5412	1192.08	100004	100001
12.4	0	0	24.0945	5.73565	1.12733	15.638	0	30	24.0248	21.6151	1238.25	100004	100001
12.45	0	0	24.1737	5.53722	1.06167	15.6855	0	30	24.1041	21.6865	1286.21	100004	100001
12.5	0	0	24.2503	5.34486	0.999622	15.7315	0	30	24.1806	21.7554	1336.03	100004	100001
12.55	0	0	24.3241	5.15846	0.941009	15.7758	0	30	24.2545	21.8218	1387.78	100004	100001
12.6	0	0	24.3954	4.97787	0.885657	15.8185	0	30	24.3257	21.886	1441.53	100004	100001
12.65	0	0	24.4642	4.80296	0.833402	15.8598	0	30	24.3945	21.9479	1497.36	100004	100001
12.7	0	0	24.5305	4.6336	0.784087	15.8996	0	30	24.4608	22.0075	1555.35	100004	100001
12.75	0	0	24.5944	4.46965	0.737559	15.938	0	30	24.5248	22.0651	1615.6	100004	100001
12.8	0	0	24.6561	4.31098	0.693674	15.975	0	30	24.5864	22.1206	1678.17	100004	100001
12.85	0	0	24.7155	4.15747	0.652292	16.0106	0	30	24.6459	22.1741	1743.17	100004	100001
12.9	0	0	24.7728	4.00896	0.613283	16.045	0	30	24.7032	22.2257	1810.69	100004	100001
12.95	0	0	24.8281	3.86534	0.576519	16.0781	0	30	24.7584	22.2754	1880.82	100004	100001
13	0	0	24.8813	3.72647	0.54188	16.1101	0	30	24.8116	22.3233	1953.66	100004	100001
13.05	0	0	24.9326	3.59223	0.509251	16.1408	0	30	24.8629	22.3694	2029.33	100004	100001
13.1	0	0	24.982	3.46248	0.478521	16.1705	0	30	24.9123	22.4139	2107.93	100004	100001
13.15	0	0	25.0295	3.33711	0.449587	16.199	0	30	24.9599	22.4567	2189.57	100004	100001
13.2	0	0	25.0754	3.21598	0.42235	16.2265	0	30	25.0057	22.4979	2274.38	100004	100001
13.25	0	0	25.1195	3.09897	0.396716	16.253	0	30	25.0498	22.5377	2362.47	100004	100001
13.3	0	0	25.162	2.98597	0.372594	16.2785	0	30	25.0923	22.5759	2453.97	100004	100001
13.35	0	0	25.2029	2.87685	0.3499	16.303	0	30	25.1332	22.6127	2549.01	100004	100001
13.4	0	0	25.2423	2.7715	0.328553	16.3267	0	30	25.1726	22.6482	2647.74	100004	100001
13.45	0	0	25.2802	2.6698	0.308476	16.3494	0	30	25.2105	22.6823	2750.29	100004	100001
13.5	0	0	25.3167	2.57165	0.289598	16.3713	0	30	25.247	22.7151	2856.81	100004	100001
13.55	0	0	25.3518	2.47693	0.271849	16.3924	0	30	25.2821	22.7467	2967.46	100004	100001
13.6	0	0	25.3856	2.38554	0.255165	16.4127	0	30	25.3159	22.7772	3082.39	100004	100001
13.65	0	0	25.4181	2.29737	0.239483	16.4322	0	30	25.3485	22.8064	3201.78	100004	100001
13.7	0	0	25.4494	2.21231	0.224747	16.451	0	30	25.3798	22.8346	3325.79	100004	100001
13.75	0	0	25.4796	2.13028	0.2109	16.469	0	30	25.4099	22.8617	3454.6	100004	100001
13.8	0	0	25.5085	2.05116	0.19789	16.4864	0	30	25.4389	22.8878	3588.4	100004	100001
13.85	0	0	25.5364	1.97487	0.18567	16.5031	0	30	25.4667	22.9129	3727.38	100004	100001
13.9	0	0	25.5632	1.90132	0.174191	16.5192	0	30	25.4935	22.937	3871.75	100004	100001
13.95	0	0	25.589	1.8304	0.163411	16.5347	0	30	25.5193	22.9602	4021.71	100004	100001
14	0	0	25.6138	1.76205	0.153288	16.5496	0	30	25.5441	22.9825	4177.47	100004	100001
14.05	0	0	25.6377	1.69616	0.143783	16.5639	0	30	25.568	23.004	4339.27	100004	100001
14.1	0	0	25.6606	1.63266	0.134858	16.5777	0	30	25.591	23.0247	4507.34	100004	100001
14.15	0	0	25.6827	1.57147	0.126481	16.5909	0	30	25.613	23.0445	4681.91	100004	100001
14.2	0	0	25.7039	1.5125	0.118617	16.6037	0	30	25.6343	23.0637	4863.25	100004	100001
14.25	0	0	25.7243	1.45569	0.111236	16.6159	0	30	25.6547	23.082	5051.61	100004	100001
14.3	0	0	25.744	1.40095	0.104308	16.6277	0	30	25.6743	23.0997	5247.27	100004	100001
14.35	0	0	25.7629	1.34822	0.0978075	16.639	0	30	25.6932	23.1167	5450.5	100004	100001
14.4	0	0	25.781	1.29742	0.0917075	16.6499	0	30	25.7113	23.133	5661.6	100004	100001
14.45	0	0	25.7985	1.2485	0.0859839	16.6604	0	30	25.7288	23.1487	5880.89	100004	100001
14.5	0	0	25.8152	1.20138	0.0806139	16.6704	0	30	25.7456	23.1638	6108.66	100004	100001
14.55	0	0	25.8314	1.15599	0.0755762	16.6801	0	30	25.7617	23.1784	6345.26	100004	100001
14.6	0	0	25.8469	1.11229	0.0708502	16.6894	0	30	25.7772	23.1923	6591.02	100004	100001
14.65	0	0	25.8618	1.0702	0.0664173	16.6984	0	30	25.7921	23.2057	6846.29	100004	100001
14.7	0	0	25.8761	1.02968	0.0622593	16.707	0	30	25.8065	23.2186	7111.46	100004	100001
14.75	0	0	25.8899	0.990663	0.0583595	16.7153	0	30	25.8203	23.2311	7386.9	100004	100001
14.8	0	0	25.9032	0.953098	0.054702	16.7232	0	30	25.8335	23.243	7673	100004	100001
14.85	0	0	25.9159	0.916933	0.0512721	16.7308	0	30	25.8463	23.2544	7970.19	100004	100001
14.9	0	0	25.9282	0.882118	0.0480556	16.7382	0	30	25.8585	23.2655	8278.88	100004	100001
14.95	0	0	25.9399	0.848604	0.0450396	16.7453	0	30	25.8703	23.2761	8599.53	100004	100001
15	0	0	25.9513	0.816344	0.0422116	16.7521	0	30	25.8816	23.2863	8932.6	100004	100001
15.05	0	0	25.9621	0.785293	0.03956	16.7586	0	30	25.8925	23.296	9278.58	100004	100001
15.1	0	0	25.9726	0.755406	0.037074	16.7649	0	30	25.9029	23.3055	9637.95	100004	100001
15.15	0	0	25.9827	0.726641	0.0347432	16.7709	0	30	25.913	23.3145	10011.2	100004	100001
15.2	0	0	25.9923	0.698958	0.0325582	16.7767	0	30	25.9227	23.3232	10399	100004	100001
15.25	0	0	26.0016	0.672316	0.0305099	16.7823	0	30	25.9319	23.3316	10801.8	100004	100001
15.3	0	0	26.0105	0.646678	0.0285897	16.7876	0	30	25.9409	23.3396	11220.1	100004	100001
15.35	0	0	26.0191	0.622006	0.0267898	16.7928	0	30	25.9495	23.3473	11654.7	100004	100001
15.4	0	0	26.0274	0.598265	0.0251027	16.7977	0	30	25.9577	23.3548	12106.1	100004	100001
15.45	0	0	26.0353	0.575421	0.0235213	16.8025	0	30	25.9656	23.3619	12575	100004	100001
15.5	0	0	26.0429	0.55344	0.0220391	16.8071	0	30	25.9733	23.3688	13062	100004	100001
15.55	0	0	26.0503	0.53229	0.02065	16.8115	0	30	25.9806	23.3754	13567.9	100004	100001
15.6	0	0	26.0573	0.511942	0.019348	16.8157	0	30	25.9876	23.3817	14093.4	100004	100001
15.65	0	0	26.0641	0.492364	0.0181278	16.8197	0	30	25.9944	23.3878	14639.3	100004	100001
15.7	0	0	26.0706	0.473528	0.0169842	16.8236	0	30	26.0009	23.3936	15206.3	100004	100001
15.75	0	0	26.0768	0.455407	0.0159126	16.8274	0	30	26.0072	23.3993	15795.2	100004	100001
15.8	0	0	26.0828	0.437974	0.0149083	16.831	0	30	26.0132	23.4047	16407	100004	100001
15.85	0	0	26.0886	0.421203	0.0139672	16.8345	0	30	26.019	23.4099	17042.5	100004	100001
15.9	0	0	26.0942	0.40507	0.0130853	16.8378	0	30	26.0245	23.4149	17702.6	100004	100001
15.95	0	0	26.0995	0.38955	0.0122589	16.841	0	30	26.0299	23.4197	18388.2	100004	100001
16	0	0	26.1047	0.374621	0.0114846	16.8441	0	30	26.035	23.4243	19100.4	100004	100001
16.05	0	0	26.1096	0.36026	0.010759	16.847	0	30	26.0399	23.4287	19840.2	100004	100001
16.1	0	0	26.1143	0.346446	0.0100792	16.8499	0	30	26.0447	23.433	20608.6	100004	100001
16.15	0	0	26.1189	0.333159	0.00944218	16.8526	0	30	26.0492	23.4371	21406.8	100004	100001
16.2	0	0	26.1233	0.320378	0.00884534	16.8553	0	30	26.0536	23.441	22235.9	100004	100001
16.25	0	0	26.1275	0.308085	0.00828613	16.8578	0	30	26.0578	23.4448	23097.2	100004	100001
16.3	0	0	26.1315	0.296261	0.0077622	16.8602	0	30	26.0618	23.4485	23991.7	100004	100001
16.35	0	0	26.1354	0.284889	0.00727132	16.8625	0	30	26.0657	23.452	24921	100004	100001
16.4	0	0	26.1391	0.27395	0.00681141	16.8648	0	30	26.0695	23.4553	25886.2	100004	100001
16.45	0	0	26.1427	0.26343	0.00638054	16.8669	0	30	26.0731	23.4586	26888.8	100004	100001
16.5	0	0	26.1462	0.253312	0.00597687	16.869	0	30	26.0765	23.4617	27930.2	100004	100001
16.55	0	0	26.1495	0.243581	0.00559869	16.871	0	30	26.0798	23.4647	29012	100004	100001
16.6	0	0	26.1527	0.234222	0.0052444	16.8729	0	30	26.083	23.4675	30135.7	100004	100001
16.65	0	0	26.1558	0.225222	0.00491248	16.8748	0	30	26.0861	23.4703	31302.9	100004	100001
16.7	0	0	26.1587	0.216566	0.00460154	16.8765	0	30	26.089	23.473	32515.3	100004	100001
16.75	0	0	26.1615	0.208241	0.00431025	16.8782	0	30	26.0919	23.4755	33774.6	100004	100001
16.8	0	0	26.1643	0.200235	0.00403737	16.8799	0	30	26.0946	23.478	35082.8	100004	100001
16.85	0	0	26.1669	0.192536	0.00378174	16.8814	0	30	26.0972	23.4803	36441.6	100004	100001
16.9	0	0	26.1694	0.185132	0.00354227	16.8829	0	30	26.0997	23.4826	37853	100004	100001
16.95	0	0	26.1718	0.178011	0.00331794	16.8844	0	30	26.1022	23.4848	39319.1	100004	100001
17	0	0	26.1741	0.171164	0.0031078	16.8858	0	30	26.1045	23.4868	40842	100004	100001
17.05	0	0	26.1764	0.164579	0.00291095	16.8871	0	30	26.1067	23.4889	42423.8	100004	100001
17.1	0	0	26.1785	0.158247	0.00272655	16.8884	0	30	26.1089	23.4908	44067	100004	100001
17.15	0	0	26.1806	0.152158	0.00255382	16.8897	0	30	26.1109	23.4926	45773.7	100004	100001
17.2	0	0	26.1826	0.146303	0.00239202	16.8908	0	30	26.1129	23.4944	47546.6	100004	100001
17.25	0	0	26.1845	0.140672	0.00224046	16.892	0	30	26.1148	23.4962	49388.2	100004	100001
17.3	0	0	26.1863	0.135257	0.00209849	16.8931	0	30	26.1167	23.4978	51301	100004	100001
17.35	0	0	26.1881	0.130051	0.00196551	16.8941	0	30	26.1184	23.4994	53288	100004	100001
17.4	0	0	26.1898	0.125044	0.00184095	16.8952	0	30	26.1201	23.5009	55351.9	100004	100001
17.45	0	0	26.1914	0.12023	0.00172428	16.8961	0	30	26.1217	23.5024	57495.7	100004	100001
17.5	0	0	26.193	0.115601	0.00161499	16.8971	0	30	26.1233	23.5038	59722.6	100004	100001
17.55	0	0	26.1945	0.111149	0.00151263	16.898	0	30	26.1248	23.5051	62035.7	100004	100001
17.6	0	0	26.1959	0.106869	0.00141674	16.8988	0	30	26.1262	23.5064	64438.5	100004	100001
17.65	0	0	26.1973	0.102753	0.00132693	16.8997	0	30	26.1276	23.5077	66934.3	100004	100001
17.7	0	0	26.1986	0.0987955	0.00124281	16.9005	0	30	26.129	23.5089	69526.7	100004	100001
17.75	0	0	26.1999	0.0949901	0.00116402	16.9013	0	30	26.1303	23.51	72219.6	100004	100001
17.8	0	0	26.2012	0.091331	0.00109022	16.902	0	30	26.1315	23.5112	75016.7	100004	100001
17.85	0	0	26.2023	0.0878127	0.0010211	16.9027	0	30	26.1327	23.5122	77922.2	100004	100001
17.9	0	0	26.2035	0.0844297	0.000956356	16.9034	0	30	26.1338	23.5133	80940.2	100004	100001
17.95	0	0	26.2046	0.0811768	0.000895714	16.904	0	30	26.1349	23.5142	84075.1	100004	100001
18	0	0	26.2056	0.0780491	0.000838916	16.9047	0	30	26.136	23.5152	87331.5	100004	100001
18.05	0	0	26.2067	0.0750417	0.000785717	16.9053	0	30	26.137	23.5161	90713.9	100004	100001
18.1	0	0	26.2076	0.0721501	0.000735889	16.9059	0	30	26.138	23.517	94227.4	100004	100001
18.15	0	0	26.2086	0.0693697	0.00068922	16.9064	0	30	26.1389	23.5178	97876.9	100004	100001
18.2	0	0	26.2095	0.0666964	0.000645509	16.907	0	30	26.1398	23.5186	100001	100004	100001
18.25	0	0	26.2103	0.064126	0.000604568	16.9075	0	30	26.1407	23.5194	100001	100004	100001
18.3	0	0	26.2112	0.0616545	0.000566223	16.908	0	30	26.1415	23.5202	100001	100004	100001
18.35	0	0	26.212	0.0592782	0.00053031	16.9085	0	30	26.1423	23.5209	100001	100004	100001
18.4	0	0	26.2127	0.0569933	0.000496674	16.9089	0	30	26.1431	23.5216	100001	100004	100001
18.45	0	0	26.2135	0.0547965	0.000465171	16.9094	0	30	26.1438	23.5222	100001	100004	100001
18.5	0	0	26.2142	0.0526843	0.000435665	16.9098	0	30	26.1445	23.5229	100001	100004	100001
18.55	0	0	26.2149	0.0506534	0.00040803	16.9102	0	30	26.1452	23.5235	100001	100004	100001
18.6	0	0	26.2155	0.0487007	0.000382147	16.9106	0	30	26.1458	23.5241	100001	100004	100001
18.65	0	0	26.2161	0.0468233	0.000357906	16.911	0	30	26.1465	23.5246	100001	100004	100001
18.7	0	0	26.2167	0.0450181	0.000335202	16.9113	0	30	26.1471	23.5252	100001	100004	100001
18.75	0	0	26.2173	0.0432825	0.000313938	16.9117	0	30	26.1477	23.5257	100001	100004	100001
18.8	0	0	26.2179	0.0416138	0.000294022	16.912	0	30	26.1482	23.5262	100001	100004	100001
18.85	0	0	26.2184	0.0400094	0.000275368	16.9124	0	30	26.1488	23.5267	100001	100004	100001
18.9	0	0	26.2189	0.0384667	0.000257897	16.9127	0	30	26.1493	23.5272	100001	100004	100001
18.95	0	0	26.2194	0.0369835	0.000241534	16.913	0	30	26.1498	23.5276	100001	100004	100001
19	0	0	26.2199	0.0355574	0.000226209	16.9132	0	30	26.1503	23.528	100001	100004	100001
19.05	0	0	26.2204	0.0341864	0.000211856	16.9135	0	30	26.1507	23.5285	100001	100004	100001
19.1	0	0	26.2208	0.0328681	0.000198414	16.9138	0	30	26.1512	23.5289	100001	100004	100001
19.15	0	0	26.2213	0.0316007	0.000185825	16.914	0	30	26.1516	23.5292	100001	100004	100001
19.2	0	0	26.2217	0.0303821	0.000174034	16.9143	0	30	26.152	23.5296	100001	100004	100001
19.25	0	0	26.2221	0.0292104	0.000162991	16.9145	0	30	26.1524	23.53	100001	100004	100001
19.3	0	0	26.2224	0.0280839	0.000152649	16.9148	0	30	26.1528	23.5303	100001	100004	100001
19.35	0	0	26.2228	0.0270009	0.000142963	16.915	0	30	26.1531	23.5306	100001	100004	100001
19.4	0	0	26.2231	0.0259596	0.000133891	16.9152	0	30	26.1535	23.5309	100001	100004	100001
19.45	0	0	26.2235	0.0249584	0.000125395	16.9154	0	30	26.1538	23.5312	100001	100004	100001
19.5	0	0	26.2238	0.0239959	0.000117438	16.9156	0	30	26.1541	23.5315	100001	100004	100001
19.55	0	0	26.2241	0.0230704	0.000109986	16.9158	0	30	26.1544	23.5318	100001	100004	100001
19.6	0	0	26.2244	0.0221806	0.000103006	16.9159	0	30	26.1547	23.5321	100001	100004	100001
19.65	0	0	26.2247	0.0213251	9.64697e-05	16.9161	0	30	26.155	23.5323	100001	100004	100001
19.7	0	0	26.225	0.0205026	9.03477e-05	16.9163	0	30	26.1553	23.5326	100001	100004	100001
19.75	0	0	26.2252	0.0197118	8.46141e-05	16.9164	0	30	26.1556	23.5328	100001	100004	100001
19.8	0	0	26.2255	0.0189516	7.92443e-05	16.9166	0	30	26.1558	23.5331	100001	100004	100001
19.85	0	0	26.2257	0.0182206	7.42151e-05	16.9167	0	30	26.1561	23.5333	100001	100004	100001
19.9	0	0	26.226	0.0175178	6.95051e-05	16.9169	0	30	26.1563	23.5335	100001	100004	100001
19.95	0	0	26.2262	0.0168421	6.50942e-05	16.917	0	30	26.1565	23.5337	100001	100004	100001
20	0	0	26.2264	0.0161924	6.09633e-05	16.9171	0	30	26.1567	23.5339	100001	100004	100001
20.05	0	0	26.2266	0.0155679	5.70945e-05	16.9173	0	30	26.157	23.5341	100001	100004	100001
20.1	0	0	26.2268	0.0149674	5.34712e-05	16.9174	0	30	26.1572	23.5343	100001	100004	100001
20.15	0	0	26.227	0.01439	5.00777e-05	16.9175	0	30	26.1573	23.5344	100001	100004	100001
20.2	0	0	26.2272	0.0138349	4.68996e-05	16.9176	0	30	26.1575	23.5346	100001	100004	100001
20.25	0	0	26.2274	0.0133013	4.39231e-05	16.9177	0	30	26.1577	23.5348	100001	100004	100001
20.3	0	0	26.2276	0.0127882	4.11355e-05	16.9178	0	30	26.1579	23.5349	100001	100004	100001
20.35	0	0	26.2277	0.0122949	3.85249e-05	16.9179	0	30	26.1581	23.5351	100001	100004	100001
20.4	0	0	26.2279	0.0118206	3.60799e-05	16.918	0	30	26.1582	23.5352	100001	100004	100001
20.45	0	0	26.228	0.0113646	3.37901e-05	16.9181	0	30	26.1584	23.5353	100001	100004	100001
20.5	0	0	26.2282	0.0109262	3.16456e-05	16.9182	0	30	26.1585	23.5355	100001	100004	100001
20.55	0	0	26.2283	0.0105047	2.96371e-05	16.9183	0	30	26.1586	23.5356	100001	100004	100001
20.6	0	0	26.2284	0.0100995	2.77562e-05	16.9184	0	30	26.1588	23.5357	100001	100004	100001
20.65	0	0	26.2286	0.00970989	2.59946e-05	16.9184	0	30	26.1589	23.5358	100001	100004	100001
20.7	0	0	26.2287	0.00933531	2.43448e-05	16.9185	0	30	26.159	23.5359	100001	100004	100001
20.75	0	0	26.2288	0.00897518	2.27997e-05	16.9186	0	30	26.1592	23.5361	100001	100004	100001
20.8	0	0	26.2289	0.00862894	2.13527e-05	16.9187	0	30	26.1593	23.5362	100001	100004	100001
20.85	0	0	26.2291	0.00829606	1.99975e-05	16.9187	0	30	26.1594	23.5363	100001	100004	100001
20.9	0	0	26.2292	0.00797601	1.87283e-05	16.9188	0	30	26.1595	23.5364	100001	100004	100001
20.95	0	0	26.2293	0.00766832	1.75397e-05	16.9189	0	30	26.1596	23.5365	100001	100004	100001
21	0	0	26.2294	0.00737249	1.64265e-05	16.9189	0	30	26.1597	23.5365	100001	100004	100001
21.05	0	0	26.2295	0.00708807	1.5384e-05	16.919	0	30	26.1598	23.5366	100001	100004	100001
21.1	0	0	26.2295	0.00681462	1.44076e-05	16.919	0	30	26.1599	23.5367	100001	100004	100001
21.15	0	0	26.2296	0.00655172	1.34932e-05	16.9191	0	30	26.16	23.5368	100001	100004	100001
21.2	0	0	26.2297	0.00629896	1.26368e-05	16.9191	0	30	26.1601	23.5369	100001	100004	100001
21.25	0	0	26.2298	0.00605596	1.18348e-05	16.9192	0	30	26.1601	23.5369	100001	100004	100001
21.3	0	0	26.2299	0.00582232	1.10837e-05	16.9192	0	30	26.1602	23.537	100001	100004	100001
21.35	0	0	26.23	0.0055977	1.03802e-05	16.9193	0	30	26.1603	23.5371	100001	100004	100001
21.4	0	0	26.23	0.00538174	9.72136e-06	16.9193	0	30	26.1604	23.5371	100001	100004	100001
21.45	0	0	26.2301	0.00517412	9.10436e-06	16.9194	0	30	26.1604	23.5372	100001	100004	100001
21.5	0	0	26.2302	0.0049745	8.52651e-06	16.9194	0	30	26.1605	23.5373	100001	100004	100001
21.55	0	0	26.2302	0.00478259	7.98535e-06	16.9194	0	30	26.1606	23.5373	100001	100004	100001
21.6	0	0	26.2303	0.00459807	7.47853e-06	16.9195	0	30	26.1606	23.5374	100001	100004	100001
21.65	0	0	26.2303	0.00442068	7.00388e-06	16.9195	0	30	26.1607	23.5374	100001	100004	100001
21.7	0	0	26.2304	0.00425013	6.55935e-06	16.9195	0	30	26.1607	23.5375	100001	100004	100001
21.75	0	0	26.2305	0.00408616	6.14303e-06	16.9196	0	30	26.1608	23.5375	100001	100004	100001
21.8	0	0	26.2305	0.00392851	5.75313e-06	16.9196	0	30	26.1608	23.5376	100001	100004	100001
21.85	0	0	26.2306	0.00377695	5.38798e-06	16.9196	0	30	26.1609	23.5376	100001	100004	100001
21.9	0	0	26.2306	0.00363123	5.046e-06	16.9197	0	30	26.1609	23.5377	100001	100004	100001
21.95	0	0	26.2307	0.00349113	4.72573e-06	16.9197	0	30	26.161	23.5377	100001	100004	100001
22	0	0	26.2307	0.00335644	4.42579e-06	16.9197	0	30	26.161	23.5377	100001	100004	100001
22.05	0	0	26.2307	0.00322695	4.14488e-06	16.9197	0	30	26.1611	23.5378	100001	100004	100001
22.1	0	0	26.2308	0.00310245	3.88181e-06	16.9198	0	30	26.1611	23.5378	100001	100004	100001
22.15	0	0	26.2308	0.00298275	3.63542e-06	16.9198	0	30	26.1612	23.5379	100001	100004	100001
22.2	0	0	26.2309	0.00286767	3.40468e-06	16.9198	0	30	26.1612	23.5379	100001	100004	100001
22.25	0	0	26.2309	0.00275703	3.18859e-06	16.9198	0	30	26.1612	23.5379	100001	100004	100001
22.3	0	0	26.2309	0.00265066	2.98621e-06	16.9199	0	30	26.1613	23.538	100001	100004	100001
22.35	0	0	26.231	0.0025484	2.79667e-06	16.9199	0	30	26.1613	23.538	100001	100004	100001
22.4	0	0	26.231	0.00245008	2.61916e-06	16.9199	0	30	26.1613	23.538	100001	100004	100001
22.45	0	0	26.231	0.00235555	2.45292e-06	16.9199	0	30	26.1614	23.538	100001	100004	100001
22.5	0	0	26.2311	0.00226467	2.29723e-06	16.9199	0	30	26.1614	23.5381	100001	100004	100001
22.55	0	0	26.2311	0.00217729	2.15142e-06	16.92	0	30	26.1614	23.5381	100001	100004	100001
22.6	0	0	26.2311	0.00209329	2.01487e-06	16.92	0	30	26.1615	23.5381	100001	100004	100001
22.65	0	0	26.2312	0.00201253	1.88698e-06	16.92	0	30	26.1615	23.5382	100001	100004	100001
22.7	0	0	26.2312	0.00193488	1.76721e-06	16.92	0	30	26.1615	23.5382	100001	100004	100001
22.75	0	0	26.2312	0.00186023	1.65505e-06	16.92	0	30	26.1615	23.5382	100001	100004	100001
22.8	0	0	26.2312	0.00178846	1.55e-06	16.92	0	30	26.1616	23.5382	100001	100004	100001
22.85	0	0	26.2312	0.00171945	1.45162e-06	16.92	0	30	26.1616	23.5382	100001	100004	100001
22.9	0	0	26.2313	0.00165311	1.35948e-06	16.9201	0	30	26.1616	23.5383	100001	100004	100001
22.95	0	0	26.2313	0.00158933	1.27319e-06	16.9201	0	30	26.1616	23.5383	100001	100004	100001
23	0	0	26.2313	0.00152801	1.19238e-06	16.9201	0	30	26.1616	23.5383	100001	100004	100001
23.05	0	0	26.2313	0.00146906	1.1167e-06	16.9201	0	30	26.1617	23.5383	100001	100004	100001
23.1	0	0	26.2314	0.00141238	1.04582e-06	16.9201	0	30	26.1617	23.5383	100001	100004	100001
23.15	0	0	26.2314	0.00135789	9.79441e-07	16.9201	0	30	26.1617	23.5383	100001	100004	100001
23.2	0	0	26.2314	0.0013055	9.17273e-07	16.9201	0	30	26.1617	23.5384	100001	100004	100001
23.25	0	0	26.2314	0.00125513	8.59053e-07	16.9201	0	30	26.1617	23.5384	100001	100004	100001
23.3	0	0	26.2314	0.0012067	8.04527e-07	16.9201	0	30	26.1618	23.5384	100001	100004	100001
23.35	0	0	26.2314	0.00116014	7.53462e-07	16.9202	0	30	26.1618	23.5384	100001	100004	100001
23.4	0	0	26.2314	0.00111538	7.05639e-07	16.9202	0	30	26.1618	23.5384	100001	100004	100001
23.45	0	0	26.2315	0.00107235	6.6085e-07	16.9202	0	30	26.1618	23.5384	100001	100004	100001
23.5	0	0	26.2315	0.00103098	6.18905e-07	16.9202	0	30	26.1618	23.5384	100001	100004	100001
23.55	0	0	26.2315	0.000991198	5.79622e-07	16.9202	0	30	26.1618	23.5385	100001	100004	100001
23.6	0	0	26.2315	0.000952955	5.42832e-07	16.9202	0	30	26.1618	23.5385	100001	100004	100001
23.65	0	0	26.2315	0.000916187	5.08377e-07	16.9202	0	30	26.1619	23.5385	100001	100004	100001
23.7	0	0	26.2315	0.000880838	4.76109e-07	16.9202	0	30	26.1619	23.5385	100001	100004	100001
23.75	0	0	26.2315	0.000846853	4.4589e-07	16.9202	0	30	26.1619	23.5385	100001	100004	100001
23.8	0	0	26.2316	0.000814179	4.17588e-07	16.9202	0	30	26.1619	23.5385	100001	100004	100001
23.85	0	0	26.2316	0.000782766	3.91083e-07	16.9202	0	30	26.1619	23.5385	100001	100004	100001
23.9	0	0	26.2316	0.000752565	3.6626e-07	16.9202	0	30	26.1619	23.5385	100001	100004	100001
23.95	0	0	26.2316	0.000723529	3.43013e-07	16.9202	0	30	26.1619	23.5385	100001	100004	100001
24	0	0	26.2316	0.000695613	3.21241e-07	16.9202	0	30	26.1619	23.5385	100001	100004	100001
24.05	0	0	26.2316	0.000668775	3.00851e-07	16.9203	0	30	26.1619	23.5386	100001	100004	100001
24.1	0	0	26.2316	0.000642971	2.81755e-07	16.9203	0	30	26.1619	23.5386	100001	100004	100001
24.15	0	0	26.2316	0.000618164	2.63872e-07	16.9203	0	30	26.1619	23.5386	100001	100004	100001
24.2	0	0	26.2316	0.000594313	2.47123e-07	16.9203	0	30	26.162	23.5386	100001	100004	100001
24.25	0	0	26.2316	0.000571383	2.31437e-07	16.9203	0	30	26.162	23.5386	100001	100004	100001
24.3	0	0	26.2316	0.000549338	2.16748e-07	16.9203	0	30	26.162	23.5386	100001	100004	100001
24.35	0	0	26.2316	0.000528143	2.0299e-07	16.9203	0	30	26.162	23.5386	100001	100004	100001
24.4	0	0	26.2317	0.000507765	1.90106e-07	16.9203	0	30	26.162	23.5386	100001	100004	100001
24.45	0	0	26.2317	0.000488174	1.78039e-07	16.9203	0	30	26.162	23.5386	100001	100004	100001
24.5	0	0	26.2317	0.000469339	1.66739e-07	16.9203	0	30	26.162	23.5386	100001	100004	100001
24.55	0	0	26.2317	0.000451231	1.56155e-07	16.9203	0	30	26.162	23.5386	100001	100004	100001
24.6	0	0	26.2317	0.000433821	1.46244e-07	16.9203	0	30	26.162	23.5386	100001	100004	100001
24.65	0	0	26.2317	0.000417083	1.36961e-07	16.9203	0	30	26.162	23.5386	100001	100004	100001
24.7	0	0	26.2317	0.00040099	1.28268e-07	16.9203	0	30	26.162	23.5386	100001	100004	100001
24.75	0	0	26.2317	0.000385519	1.20127e-07	16.9203	0	30	26.162	23.5386	100001	100004	100001
24.8	0	0	26.2317	0.000370645	1.12502e-07	16.9203	0	30	26.162	23.5386	100001	100004	100001
24.85	0	0	26.2317	0.000356344	1.05361e-07	16.9203	0	30	26.162	23.5386	100001	100004	100001
24.9	0	0	26.2317	0.000342595	9.86739e-08	16.9203	0	30	26.162	23.5387	100001	100004	100001
24.95	0	0	26.2317	0.000329377	9.24112e-08	16.9203	0	30	26.162	23.5387	100001	100004	100001
25	0	0	26.2317	0.000316669	8.65459e-08	16.9203	0	30	26.1621	23.5387	100001	100004	100001
25.05	0	0	26.2317	0.000304451	8.10528e-08	16.9203	0	30	26.1621	23.5387	100001	100004	100001
25.1	0	0	26.2317	0.000292704	7.59085e-08	16.9203	0	30	26.1621	23.5387	100001	100004	100001
25.15	0	0	26.2317	0.000281411	7.10906e-08	16.9203	0	30	26.1621	23.5387	100001	100004	100001
25.2	0	0	26.2317	0.000270553	6.65786e-08	16.9203	0	30	26.1621	23.5387	100001	100004	100001
25.25	0	0	26.2317	0.000260114	6.23529e-08	16.9203	0	30	26.1621	23.5387	100001	100004	100001
25.3	0	0	26.2317	0.000250078	5.83953e-08	16.9203	0	30	26.1621	23.5387	100001	100004	100001
25.35	0	0	26.2317	0.00024043	5.4689e-08	16.9203	0	30	26.1621	23.5387	100001	100004	100001
25.4	0	0	26.2317	0.000231153	5.12179e-08	16.9203	0	30	26.1621	23.5387	100001	100004	100001
25.45	0	0	26.2317	0.000222234	4.79671e-08	16.9203	0	30	26.1621	23.5387	100001	100004	100001
25.5	0	0	26.2318	0.00021366	4.49226e-08	16.9203	0	30	26.1621	23.5387	100001	100004	100001
25.55	0	0	26.2318	0.000205416	4.20713e-08	16.9203	0	30	26.1621	23.5387	100001	100004	100001
25.6	0	0	26.2318	0.000197491	3.94011e-08	16.9203	0	30	26.1621	23.5387	100001	100004	100001
25.65	0	0	26.2318	0.000189871	3.69003e-08	16.9204	0	30	26.1621	23.5387	100001	100004	100001
25.7	0	0	26.2318	0.000182545	3.45582e-08	16.9204	0	30	26.1621	23.5387	100001	100004	100001
25.75	0	0	26.2318	0.000175502	3.23649e-08	16.9204	0	30	26.1621	23.5387	100001	100004	100001
25.8	0	0	26.2318	0.000168731	3.03107e-08	16.9204	0	30	26.1621	23.5387	100001	100004	100001
25.85	0	0	26.2318	0.000162221	2.83869e-08	16.9204	0	30	26.1621	23.5387	100001	100004	100001
25.9	0	0	26.2318	0.000155962	2.65852e-08	16.9204	0	30	26.1621	23.5387	100001	100004	100001
25.95	0	0	26.2318	0.000149944	2.48978e-08	16.9204	0	30	26.1621	23.5387	100001	100004	100001
26	0	0	26.2318	0.000144159	2.33176e-08	16.9204	0	30	26.1621	23.5387	100001	100004	100001
26.05	0	0	26.2318	0.000138597	2.18376e-08	16.9204	0	30	26.1621	23.5387	100001	100004	100001
26.1	0	0	26.2318	0.000133249	2.04516e-08	16.9204	0	30	26.1621	23.5387	100001	100004	100001
26.15	0	0	26.2318	0.000128108	1.91535e-08	16.9204	0	30	26.1621	23.5387	100001	100004	100001
26.2	0	0	26.2318	0.000123165	1.79378e-08	16.9204	0	30	26.1621	23.5387	100001	100004	100001
26.25	0	0	26.2318	0.000118413	1.67993e-08	16.9204	0	30	26.1621	23.5387	100001	100004	100001
26.3	0	0	26.2318	0.000113844	1.57331e-08	16.9204	0	30	26.1621	23.5387	100001	100004	100001
26.35	0	0	26.2318	0.000109452	1.47345e-08	16.9204	0	30	26.1621	23.5387	100001	100004	100001
26.4	0	0	26.2318	0.000105229	1.37993e-08	16.9204	0	30	26.1621	23.5387	100001	100004	100001
26.45	0	0	26.2318	0.000101169	1.29235e-08	16.9204	0	30	26.1621	23.5387	100001	100004	100001
26.5	0	0	26.2318	9.72655e-05	1.21032e-08	16.9204	0	30	26.1621	23.5387	100001	100004	100001
26.55	0	0	26.2318	9.35127e-05	1.1335e-08	16.9204	0	30	26.1621	23.5387	100001	100004	100001
26.6	0	0	26.2318	8.99047e-05	1.06156e-08	16.9204	0	30	26.1621	23.5387	100001	100004	100001
26.65	0	0	26.2318	8.64359e-05	9.94182e-09	16.9204	0	30	26.1621	23.5387	100001	100004	100001
26.7	0	0	26.2318	8.31009e-05	9.31082e-09	16.9204	0	30	26.1621	23.5387	100001	100004	100001
26.75	0	0	26.2318	7.98946e-05	8.71986e-09	16.9204	0	30	26.1621	23.5387	100001	100004	100001
26.8	0	0	26.2318	7.68121e-05	8.16641e-09	16.9204	0	30	26.1621	23.5387	100001	100004	100001
26.85	0	0	26.2318	7.38484e-05	7.64809e-09	16.9204	0	30	26.1621	23.5387	100001	100004	100001
26.9	0	0	26.2318	7.09991e-05	7.16267e-09	16.9204	0	30	26.1621	23.5387	100001	100004	100001
26.95	0	0	26.2318	6.82598e-05	6.70805e-09	16.9204	0	30	26.1621	23.5387	100001	100004	100001
27	0	0	26.2318	6.56261e-05	6.28229e-09	16.9204	0	30	26.1621	23.5387	100001	100004	100001
27.05	0	0	26.2318	6.3094e-05	5.88356e-09	16.9204	0	30	26.1621	23.5387	100001	100004	100001
27.1	0	0	26.2318	6.06597e-05	5.51013e-09	16.9204	0	30	26.1621	23.5387	100001	100004	100001
27.15	0	0	26.2318	5.83192e-05	5.1604e-09	16.9204	0	30	26.1621	23.5387	100001	100004	100001
27.2	0	0	26.2318	5.60691e-05	4.83287e-09	16.9204	0	30	26.1621	23.5387	100001	100004	100001
27.25	0	0	26.2318	5.39058e-05	4.52613e-09	16.9204	0	30	26.1621	23.5387	100001	100004	100001
27.3	0	0	26.2318	5.18259e-05	4.23886e-09	16.9204	0	30	26.1621	23.5387	100001	100004	100001
27.35	0	0	26.2318	4.98263e-05	3.96982e-09	16.9204	0	30	26.1621	23.5387	100001	100004	100001
27.4	0	0	26.2318	4.79039e-05	3.71785e-09	16.9204	0	30	26.1621	23.5387	100001	100004	100001
27.45	0	0	26.2318	4.60556e-05	3.48188e-09	16.9204	0	30	26.1621	23.5387	100001	100004	100001
27.5	0	0	26.2318	4.42786e-05	3.26089e-09	16.9204	0	30	26.1621	23.5387	100001	100004	100001
27.55	0	0	26.2318	4.25702e-05	3.05392e-09	16.9204	0	30	26.1621	23.5387	100001	100004	100001
27.6	0	0	26.2318	4.09277e-05	2.86009e-09	16.9204	0	30	26.1621	23.5387	100001	100004	100001
27.65	0	0	26.2318	3.93486e-05	2.67856e-09	16.9204	0	30	26.1621	23.5387	100001	100004	100001
27.7	0	0	26.2318	3.78304e-05	2.50855e-09	16.9204	0	30	26.1621	23.5387	100001	100004	100001
27.75	0	0	26.2318	3.63708e-05	2.34933e-09	16.9204	0	30	26.1621	23.5387	100001	100004	100001
27.8	0	0	26.2318	3.49675e-05	2.20022e-09	16.9204	0	30	26.1621	23.5387	100001	100004	100001
27.85	0	0	26.2318	3.36183e-05	2.06057e-09	16.9204	0	30	26.1621	23.5387	100001	100004	100001
27.9	0	0	26.2318	3.23212e-05	1.92979e-09	16.9204	0	30	26.1621	23.5387	100001	100004	100001
27.95	0	0	26.2318	3.10742e-05	1.8073e-09	16.9204	0	30	26.1621	23.5387	100001	100004	100001
28	0	0	26.2318	2.98752e-05	1.6926e-09	16.9204	0	30	26.1621	23.5387	100001	100004	100001
28.05	0	0	26.2318	2.87226e-05	1.58517e-09	16.9204	0	30	26.1621	23.5387	100001	100004	100001
28.1	0	0	26.2318	2.76144e-05	1.48456e-09	16.9204	0	30	26.1621	23.5387	100001	100004	100001
28.15	0	0	26.2318	2.65489e-05	1.39033e-09	16.9204	0	30	26.1621	23.5387	100001	100004	100001
28.2	0	0	26.2318	2.55246e-05	1.30209e-09	16.9204	0	30	26.1621	23.5387	100001	100004	100001
28.25	0	0	26.2318	2.45398e-05	1.21944e-09	16.9204	0	30	26.1621	23.5387	100001	100004	100001
28.3	0	0	26.2318	2.35929e-05	1.14205e-09	16.9204	0	30	26.1621	23.5387	100001	100004	100001
28.35	0	0	26.2318	2.26826e-05	1.06956e-09	16.9204	0	30	26.1621	23.5387	100001	100004	100001
28.4	0	0	26.2318	2.18075e-05	1.00168e-09	16.9204	0	30	26.1621	23.5387	100001	100004	100001
28.45	0	0	26.2318	2.09661e-05	9.38099e-10	16.9204	0	30	26.1621	23.5387	100001	100004	100001
28.5	0	0	26.2318	2.01571e-05	8.78558e-10	16.9204	0	30	26.1621	23.5387	100001	100004	100001
28.55	0	0	26.2318	1.93794e-05	8.22796e-10	16.9204	0	30	26.1621	23.5387	100001	100004	100001
28.6	0	0	26.2318	1.86317e-05	7.70573e-10	16.9204	0	30	26.1621	23.5387	100001	100004	100001
28.65	0	0	26.2318	1.79128e-05	7.21665e-10	16.9204	0	30	26.1622	23.5387	100001	100004	100001
28.7	0	0	26.2318	1.72217e-05	6.75861e-10	16.9204	0	30	26.1622	23.5387	100001	100004	100001
28.75	0	0	26.2318	1.65572e-05	6.32964e-10	16.9204	0	30	26.1622	23.5387	100001	100004	100001
28.8	0	0	26.2318	1.59184e-05	5.9279e-10	16.9204	0	30	26.1622	23.5388	100001	100004	100001
28.85	0	0	26.2318	1.53042e-05	5.55166e-10	16.9204	0	30	26.1622	23.5388	100001	100004	100001
28.9	0	0	26.2318	1.47137e-05	5.1993e-10	16.9204	0	30	26.1622	23.5388	100001	100004	100001
28.95	0	0	26.2318	1.4146e-05	4.86929e-10	16.9204	0	30	26.1622	23.5388	100001	100004	100001
29	0	0	26.2318	1.36002e-05	4.56024e-10	16.9204	0	30	26.1622	23.5388	100001	100004	100001
29.05	0	0	26.2318	1.30755e-05	4.2708e-10	16.9204	0	30	26.1622	23.5388	100001	100004	100001
29.1	0	0	26.2318	1.2571e-05	3.99973e-10	16.9204	0	30	26.1622	23.5388	100001	100004	100001
29.15	0	0	26.2318	1.2086e-05	3.74587e-10	16.9204	0	30	26.1622	23.5388	100001	100004	100001
29.2	0	0	26.2318	1.16197e-05	3.50812e-10	16.9204	0	30	26.1622	23.5388	100001	100004	100001
29.25	0	0	26.2318	1.11713e-05	3.28546e-10	16.9204	0	30	26.1622	23.5388	100001	100004	100001
29.3	0	0	26.2318	1.07403e-05	3.07694e-10	16.9204	0	30	26.1622	23.5388	100001	100004	100001
29.35	0	0	26.2318	1.03259e-05	2.88164e-10	16.9204	0	30	26.1622	23.5388	100001	100004	100001
29.4	0	0	26.2318	9.92751e-06	2.69874e-10	16.9204	0	30	26.1622	23.5388	100001	100004	100001
29.45	0	0	26.2318	9.54448e-06	2.52746e-10	16.9204	0	30	26.1622	23.5388	100001	100004	100001
29.5	0	0	26.2318	9.17622e-06	2.36704e-10	16.9204	0	30	26.1622	23.5388	100001	100004	100001
29.55	0	0	26.2318	8.82217e-06	2.2168e-10	16.9204	0	30	26.1622	23.5388	100001	100004	100001
29.6	0	0	26.2318	8.48179e-06	2.0761e-10	16.9204	0	30	26.1622	23.5388	100001	100004	100001
29.65	0	0	26.2318	8.15453e-06	1.94433e-10	16.9204	0	30	26.1622	23.5388	100001	100004	100001
29.7	0	0	26.2318	7.8399e-06	1.82093e-10	16.9204	0	30	26.1622	23.5388	100001	100004	100001
29.75	0	0	26.2318	7.53742e-06	1.70535e-10	16.9204	0	30	26.1622	23.5388	100001	100004	100001
29.8	0	0	26.2318	7.2466e-06	1.59711e-10	16.9204	0	30	26.1622	23.5388	100001	100004	100001
29.85	0	0	26.2318	6.967e-06	1.49574e-10	16.9204	0	30	26.1622	23.5388	100001	100004	100001
29.9	0	0	26.2318	6.69819e-06	1.40081e-10	16.9204	0	30	26.1622	23.5388	100001	100004	100001
29.95	0	0	26.2318	6.43976e-06	1.3119e-10	16.9204	0	30	26.1622	23.5388	100001	100004	100001
30	0	0	26.2318	6.19129e-06	1.22863e-10	16.9204	0	30	26.1622	23.5388	100001	100004	100001
30.05	0	0	26.2318	5.95241e-06	1.15065e-10	16.9204	0	30	26.1622	23.5388	100001	100004	100001
30.1	0	0	26.2318	5.72275e-06	1.07762e-10	16.9204	0	30	26.1622	23.5388	100001	100004	100001
30.15	0	0	26.2318	5.50195e-06	1.00922e-10	16.9204	0	30	26.1622	23.5388	100001	100004	100001
30.2	0	0	26.2318	5.28966e-06	9.45169e-11	16.9204	0	30	26.1622	23.5388	100001	100004	100001
30.25	0	0	26.2318	5.08557e-06	8.85179e-11	16.9204	0	30	26.1622	23.5388	100001	100004	100001
30.3	0	0	26.2318	4.88936e-06	8.28997e-11	16.9204	0	30	26.1622	23.5388	100001	100004	100001
30.35	0	0	26.2318	4.70071e-06	7.76381e-11	16.9204	0	30	26.1622	23.5388	100001	100004	100001
30.4	0	0	26.2318	4.51934e-06	7.27103e-11	16.9204	0	30	26.1622	23.5388	100001	100004	100001
30.45	0	0	26.2318	4.34497e-06	6.80954e-11	16.9204	0	30	26.1622	23.5388	100001	100004	100001
30.5	0	0	26.2318	4.17733e-06	6.37735e-11	16.9204	0	30	26.1622	23.5388	100001	100004	100001
30.55	0	0	26.2318	4.01615e-06	5.97257e-11	16.9204	0	30	26.1622	23.5388	100001	100004	100001
30.6	0	0	26.2318	3.8612e-06	5.5935e-11	16.9204	0	30	26.1622	23.5388	100001	100004	100001
30.65	0	0	26.2318	3.71222e-06	5.23848e-11	16.9204	0	30	26.1622	23.5388	100001	100004	100001
30.7	0	0	26.2318	3.56899e-06	4.90599e-11	16.9204	0	30	26.1622	23.5388	100001	100004	100001
30.75	0	0	26.2318	3.43129e-06	4.59461e-11	16.9204	0	30	26.1622	23.5388	100001	100004	100001
30.8	0	0	26.2318	3.2989e-06	4.30299e-11	16.9204	0	30	26.1622	23.5388	100001	100004	100001
30.85	0	0	26.2318	3.17162e-06	4.02988e-11	16.9204	0	30	26.1622	23.5388	100001	100004	100001
30.9	0	0	26.2318	3.04925e-06	3.7741e-11	16.9204	0	30	26.1622	23.5388	100001	100004	100001
30.95	0	0	26.2318	2.9316e-06	3.53456e-11	16.9204	0	30	26.1622	23.5388	100001	100004	100001
31	0	0	26.2318	2.81849e-06	3.31022e-11	16.9204	0	30	26.1622	23.5388	100001	100004	100001
31.05	0	0	26.2318	2.70974e-06	3.10012e-11	16.9204	0	30	26.1622	23.5388	100001	100004	100001
31.1	0	0	26.2318	2.60519e-06	2.90336e-11	16.9204	0	30	26.1622	23.5388	100001	100004	100001
31.15	0	0	26.2318	2.50467e-06	2.71908e-11	16.9204	0	30	26.1622	23.5388	100001	100004	100001
31.2	0	0	26.2318	2.40804e-06	2.5465e-11	16.9204	0	30	26.1622	23.5388	100001	100004	100001
31.25	0	0	26.2318	2.31513e-06	2.38488e-11	16.9204	0	30	26.1622	23.5388	100001	100004	100001
31.3	0	0	26.2318	2.2258e-06	2.23351e-11	16.9204	0	30	26.1622	23.5388	100001	100004	100001
31.35	0	0	26.2318	2.13992e-06	2.09175e-11	16.9204	0	30	26.1622	23.5388	100001	100004	100001
31.4	0	0	26.2318	2.05736e-06	1.95898e-11	16.9204	0	30	26.1622	23.5388	100001	100004	100001
31.45	0	0	26.2318	1.97798e-06	1.83465e-11	16.9204	0	30	26.1622	23.5388	100001	100004	100001
31.5	0	0	26.2318	1.90166e-06	1.7182e-11	16.9204	0	30	26.1622	23.5388	100001	100004	100001
31.55	0	0	26.2318	1.82829e-06	1.60915e-11	16.9204	0	30	26.1622	23.5388	100001	100004	100001
31.6	0	0	26.2318	1.75775e-06	1.50702e-11	16.9204	0	30	26.1622	23.5388	100001	100004	100001
31.65	0	0	26.2318	1.68993e-06	1.41137e-11	16.9204	0	30	26.1622	23.5388	100001	100004	100001
31.7	0	0	26.2318	1.62473e-06	1.32179e-11	16.9204	0	30	26.1622	23.5388	100001	100004	100001
31.75	0	0	26.2318	1.56204e-06	1.23789e-11	16.9204	0	30	26.1622	23.5388	100001	100004	100001
31.8	0	0	26.2318	1.50177e-06	1.15932e-11	16.9204	0	30	26.1622	23.5388	100001	100004	100001
31.85	0	0	26.2318	1.44383e-06	1.08574e-11	16.9204	0	30	26.1622	23.5388	100001	100004	100001
31.9	0	0	26.2318	1.38812e-06	1.01683e-11	16.9204	0	30	26.1622	23.5388	100001	100004	100001
31.95	0	0	26.2318	1.33456e-06	9.52292e-12	16.9204	0	30	26.1622	23.5388	100001	100004	100001
32	0	0	26.2318	1.28307e-06	8.9185e-12	16.9204	0	30	26.1622	23.5388	100001	100004	100001
32.05	0	0	26.2318	1.23357e-06	8.35244e-12	16.9204	0	30	26.1622	23.5388	100001	100004	100001
32.1	0	0	26.2318	1.18597e-06	7.82231e-12	16.9204	0	30	26.1622	23.5388	100001	100004	100001
32.15	0	0	26.2318	1.14021e-06	7.32583e-12	16.9204	0	30	26.1622	23.5388	100001	100004	100001
32.2	0	0	26.2318	1.09622e-06	6.86086e-12	16.9204	0	30	26.1622	23.5388	100001	100004	100001
32.25	0	0	26.2318	1.05392e-06	6.4254e-12	16.9204	0	30	26.1622	23.5388	100001	100004	100001
32.3	0	0	26.2318	1.01326e-06	6.01758e-12	16.9204	0	30	26.1622	23.5388	100001	100004	100001
32.35	0	0	26.2318	9.74166e-07	5.63565e-12	16.9204	0	30	26.1622	23.5388	100001	100004	100001
32.4	0	0	26.2318	9.36579e-07	5.27795e-12	16.9204	0	30	26.1622	23.5388	100001	100004	100001
32.45	0	0	26.2318	9.00443e-07	4.94296e-12	16.9204	0	30	26.1622	23.5388	100001	100004	100001
32.5	0	0	26.2318	8.65701e-07	4.62923e-12	16.9204	0	30	26.1622	23.5388	100001	100004	100001
32.55	0	0	26.2318	8.323e-07	4.33542e-12	16.9204	0	30	26.1622	23.5388	100001	100004	100001
32.6	0	0	26.2318	8.00187e-07	4.06025e-12	16.9204	0	30	26.1622	23.5388	100001	100004	100001
32.65	0	0	26.2318	7.69314e-07	3.80255e-12	16.9204	0	30	26.1622	23.5388	100001	100004	100001
32.7	0	0	26.2318	7.39631e-07	3.56123e-12	16.9204	0	30	26.1622	23.5388	100001	100004	100001
32.75	0	0	26.2318	7.11094e-07	3.33524e-12	16.9204	0	30	26.1622	23.5388	100001	100004	100001
32.8	0	0	26.2318	6.83658e-07	3.1236e-12	16.9204	0	30	26.1622	23.5388	100001	100004	100001
32.85	0	0	26.2318	6.57281e-07	2.92539e-12	16.9204	0	30	26.1622	23.5388	100001	100004	100001
32.9	0	0	26.2318	6.31922e-07	2.73982e-12	16.9204	0	30	26.1622	23.5388	100001	100004	100001
32.95	0	0	26.2318	6.07541e-07	2.56602e-12	16.9204	0	30	26.1622	23.5388	100001	100004	100001
33	0	0	26.2318	5.84101e-07	2.40321e-12	16.9204	0	30	26.1622	23.5388	100001	100004	100001
33.05	0	0	26.2318	5.61565e-07	2.25073e-12	16.9204	0	30	26.1622	23.5388	100001	100004	100001
33.1	0	0	26.2318	5.39899e-07	2.10797e-12	16.9204	0	30	26.1622	23.5388	100001	100004	100001
33.15	0	0	26.2318	5.19068e-07	1.97426e-12	16.9204	0	30	26.1622	23.5388	100001	100004	100001
33.2	0	0	26.2318	4.99042e-07	1.84899e-12	16.9204	0	30	26.1622	23.5388	100001	100004	100001
33.25	0	0	26.2318	4.79787e-07	1.73166e-12	16.9204	0	30	26.1622	23.5388	100001	100004	100001
33.3	0	0	26.2318	4.61276e-07	1.62179e-12	16.9204	0	30	26.1622	23.5388	100001	100004	100001
33.35	0	0	26.2318	4.43479e-07	1.51888e-12	16.9204	0	30	26.1622	23.5388	100001	100004	100001
33.4	0	0	26.2318	4.26369e-07	1.42248e-12	16.9204	0	30	26.1622	23.5388	100001	100004	100001
33.45	0	0	26.2318	4.09918e-07	1.33219e-12	16.9204	0	30	26.1622	23.5388	100001	100004	100001
33.5	0	0	26.2318	3.94102e-07	1.24764e-12	16.9204	0	30	26.1622	23.5388	100001	100004	100001
33.55	0	0	26.2318	3.78897e-07	1.16846e-12	16.9204	0	30	26.1622	23.5388	100001	100004	100001
33.6	0	0	26.2318	3.64278e-07	1.09429e-12	16.9204	0	30	26.1622	23.5388	100001	100004	100001
33.65	0	0	26.2318	3.50223e-07	1.02484e-12	16.9204	0	30	26.1622	23.5388	100001	100004	100001
33.7	0	0	26.2318	3.36711e-07	9.59807e-13	16.9204	0	30	26.1622	23.5388	100001	100004	100001
33.75	0	0	26.2318	3.2372e-07	8.98908e-13	16.9204	0	30	26.1622	23.5388	100001	100004	100001
33.8	0	0	26.2318	3.1123e-07	8.41877e-13	16.9204	0	30	26.1622	23.5388	100001	100004	100001
33.85	0	0	26.2318	2.99222e-07	7.88475e-13	16.9204	0	30	26.1622	23.5388	100001	100004	100001
33.9	0	0	26.2318	2.87677e-07	7.38475e-13	16.9204	0	30	26.1622	23.5388	100001	100004	100001
33.95	0	0	26.2318	2.76578e-07	6.91651e-13	16.9204	0	30	26.1622	23.5388	100001	100004	100001
34	0	0	26.2318	2.65907e-07	6.47791e-13	16.9204	0	30	26.1622	23.5388	100001	100004	100001
34.05	0	0	26.2318	2.55648e-07	6.06716e-13	16.9204	0	30	26.1622	23.5388	100001	100004	100001
34.1	0	0	26.2318	2.45785e-07	5.68252e-13	16.9204	0	30	26.1622	23.5388	100001	100004	100001
34.15	0	0	26.2318	2.36302e-07	5.3222e-13	16.9204	0	30	26.1622	23.5388	100001	100004	100001
34.2	0	0	26.2318	2.27185e-07	4.98456e-13	16.9204	0	30	26.1622	23.5388	100001	100004	100001
34.25	0	0	26.2318	2.1842e-07	4.66829e-13	16.9204	0	30	26.1622	23.5388	100001	100004	100001
34.3	0	0	26.2318	2.09993e-07	4.37208e-13	16.9204	0	30	26.1622	23.5388	100001	100004	100001
34.35	0	0	26.2318	2.01891e-07	4.0946e-13	16.9204	0	30	26.1622	23.5388	100001	100004	100001
34.4	0	0	26.2318	1.94101e-07	3.83468e-13	16.9204	0	30	26.1622	23.5388	100001	100004	100001
34.45	0	0	26.2318	1.86612e-07	3.59122e-13	16.9204	0	30	26.1622	23.5388	100001	100004	100001
34.5	0	0	26.2318	1.79412e-07	3.3632e-13	16.9204	0	30	26.1622	23.5388	100001	100004	100001
34.55	0	0	26.2318	1.7249e-07	3.14966e-13	16.9204	0	30	26.1622	23.5388	100001	100004	100001
34.6	0	0	26.2318	1.65835e-07	2.9497e-13	16.9204	0	30	26.1622	23.5388	100001	100004	100001
34.65	0	0	26.2318	1.59437e-07	2.76246e-13	16.9204	0	30	26.1622	23.5388	100001	100004	100001
34.7	0	0	26.2318	1.53285e-07	2.58713e-13	16.9204	0	30	26.1622	23.5388	100001	100004	100001
34.75	0	0	26.2318	1.47371e-07	2.42295e-13	16.9204	0	30	26.1622	23.5388	100001	100004	100001
34.8	0	0	26.2318	1.41685e-07	2.26917e-13	16.9204	0	30	26.1622	23.5388	100001	100004	100001
34.85	0	0	26.2318	1.36219e-07	2.12522e-13	16.9204	0	30	26.1622	23.5388	100001	100004	100001
34.9	0	0	26.2318	1.30963e-07	1.99047e-13	16.9204	0	30	26.1622	23.5388	100001	100004	100001
34.95	0	0	26.2318	1.25911e-07	1.86429e-13	16.9204	0	30	26.1622	23.5388	100001	100004	100001
35	0	0	26.2318	1.21053e-07	1.74612e-13	16.9204	0	30	26.1622	23.5388	100001	100004	100001
35.05	0	0	26.2318	1.16382e-07	1.63549e-13	16.9204	0	30	26.1622	23.5388	100001	100004	100001
35.1	0	0	26.2318	1.11892e-07	1.53188e-13	16.9204	0	30	26.1622	23.5388	100001	100004	100001
35.15	0	0	26.2318	1.07575e-07	1.43483e-13	16.9204	0	30	26.1622	23.5388	100001	100004	100001
35.2	0	0	26.2318	1.03425e-07	1.34389e-13	16.9204	0	30	26.1622	23.5388	100001	100004	100001
35.25	0	0	26.2318	9.94346e-08	1.25873e-13	16.9204	0	30	26.1622	23.5388	100001	100004	100001
35.3	0	0	26.2318	9.55983e-08	1.17896e-13	16.9204	0	30	26.1622	23.5388	100001	100004	100001
35.35	0	0	26.2318	9.191e-08	1.10425e-13	16.9204	0	30	26.1622	23.5388	100001	100004	100001
35.4	0	0	26.2318	8.8364e-08	1.03427e-13	16.9204	0	30	26.1622	23.5388	100001	100004	100001
35.45	0	0	26.2318	8.49547e-08	9.68697e-14	16.9204	0	30	26.1622	23.5388	100001	100004	100001
35.5	0	0	26.2318	8.1677e-08	9.07266e-14	16.9204	0	30	26.1622	23.5388	100001	100004	100001
35.55	0	0	26.2318	7.85258e-08	8.49709e-14	16.9204	0	30	26.1622	23.5388	100001	100004	100001
35.6	0	0	26.2318	7.54961e-08	7.95774e-14	16.9204	0	30	26.1622	23.5388	100001	100004	100001
35.65	0	0	26.2318	7.25833e-08	7.45265e-14	16.9204	0	30	26.1622	23.5388	100001	100004	100001
35.7	0	0	26.2318	6.97829e-08	6.97961e-14	16.9204	0	30	26.1622	23.5388	100001	100004	100001
35.75	0	0	26.2318	6.70906e-08	6.53667e-14	16.9204	0	30	26.1622	23.5388	100001	100004	100001
35.8	0	0	26.2318	6.45021e-08	6.12199e-14	16.9204	0	30	26.1622	23.5388	100001	100004	100001
35.85	0	0	26.2318	6.20135e-08	5.7336e-14	16.9204	0	30	26.1622	23.5388	100001	100004	100001
35.9	0	0	26.2318	5.96209e-08	5.36988e-14	16.9204	0	30	26.1622	23.5388	100001	100004	100001
35.95	0	0	26.2318	5.73206e-08	5.02918e-14	16.9204	0	30	26.1622	23.5388	100001	100004	100001
36	0	0	26.2318	5.51091e-08	4.70991e-14	16.9204	0	30	26.1622	23.5388	100001	100004	100001
36.05	0	0	26.2318	5.29829e-08	4.41121e-14	16.9204	0	30	26.1622	23.5388	100001	100004	100001
36.1	0	0	26.2318	5.09388e-08	4.13155e-14	16.9204	0	30	26.1622	23.5388	100001	100004	100001
36.15	0	0	26.2318	4.89735e-08	3.86975e-14	16.9204	0	30	26.1622	23.5388	100001	100004	100001
36.2	0	0	26.2318	4.7084e-08	3.62465e-14	16.9204	0	30	26.1622	23.5388	100001	100004	100001
36.25	0	0	26.2318	4.52674e-08	3.3951e-14	16.9204	0	30	26.1622	23.5388	100001	100004	100001
36.3	0	0	26.2318	4.3521e-08	3.18007e-14	16.9204	0	30	26.1622	23.5388	100001	100004	100001
36.35	0	0	26.2318	4.18419e-08	2.97856e-14	16.9204	0	30	26.1622	23.5388	100001	100004	100001
36.4	0	0	26.2318	4.02275e-08	2.7896e-14	16.9204	0	30	26.1622	23.5388	100001	100004	100001
36.45	0	0	26.2318	3.86755e-08	2.61277e-14	16.9204	0	30	26.1622	23.5388	100001	100004	100001
36.5	0	0	26.2318	3.71833e-08	2.44716e-14	16.9204	0	30	26.1622	23.5388	100001	100004	100001
36.55	0	0	26.2318	3.57487e-08	2.2921e-14	16.9204	0	30	26.1622	23.5388	100001	100004	100001
36.6	0	0	26.2318	3.43695e-08	2.14695e-14	16.9204	0	30	26.1622	23.5388	100001	100004	100001
36.65	0	0	26.2318	3.30435e-08	2.01087e-14	16.9204	0	30	26.1622	23.5388	100001	100004	100001
36.7	0	0	26.2318	3.17686e-08	1.88336e-14	16.9204	0	30	26.1622	23.5388	100001	100004	100001
36.75	0	0	26.2318	3.05429e-08	1.76381e-14	16.9204	0	30	26.1622	23.5388	100001	100004	100001
36.8	0	0	26.2318	2.93645e-08	1.65174e-14	16.9204	0	30	26.1622	23.5388	100001	100004	100001
36.85	0	0	26.2318	2.82316e-08	1.54708e-14	16.9204	0	30	26.1622	23.5388	100001	100004	100001
36.9	0	0	26.2318	2.71425e-08	1.44922e-14	16.9204	0	30	26.1622	23.5388	100001	100004	100001
36.95	0	0	26.2318	2.60954e-08	1.35773e-14	16.9204	0	30	26.1622	23.5388	100001	100004	100001
37	0	0	26.2318	2.50887e-08	1.27223e-14	16.9204	0	30	26.1622	23.5388	100001	100004	100001
37.05	0	0	26.2318	2.41209e-08	1.19231e-14	16.9204	0	30	26.1622	23.5388	100001	100004	100001
37.1	0	0	26.2318	2.31904e-08	1.11757e-14	16.9204	0	30	26.1622	23.5388	100001	100004	100001
37.15	0	0	26.2318	2.22959e-08	1.04797e-14	16.9204	0	30	26.1622	23.5388	100001	100004	100001
37.2	0	0	26.2318	2.1436e-08	9.82927e-15	16.9204	0	30	26.1622	23.5388	100001	100004	100001
37.25	0	0	26.2318	2.06092e-08	9.22053e-15	16.9204	0	30	26.1622	23.5388	100001	100004	100001
37.3	0	0	26.2318	1.98144e-08	8.64922e-15	16.9204	0	30	26.1622	23.5388	100001	100004	100001
37.35	0	0	26.2318	1.90501e-08	8.11075e-15	16.9204	0	30	26.1622	23.5388	100001	100004	100001
37.4	0	0	26.2318	1.83152e-08	7.60012e-15	16.9204	0	30	26.1622	23.5388	100001	100004	100001
37.45	0	0	26.2318	1.76088e-08	7.12819e-15	16.9204	0	30	26.1622	23.5388	100001	100004	100001
37.5	0	0	26.2318	1.69298e-08	6.68669e-15	16.9204	0	30	26.1622	23.5388	100001	100004	100001
37.55	0	0	26.2318	1.62769e-08	6.27159e-15	16.9204	0	30	26.1622	23.5388	100001	100004	100001
37.6	0	0	26.2318	1.56491e-08	5.88038e-15	16.9204	0	30	26.1622	23.5388	100001	100004	100001
37.65	0	0	26.2318	1.50455e-08	5.5105e-15	16.9204	0	30	26.1622	23.5388	100001	100004	100001
37.7	0	0	26.2318	1.44651e-08	5.15938e-15	16.9204	0	30	26.1622	23.5388	100001	100004	100001
37.75	0	0	26.2318	1.39071e-08	4.83059e-15	16.9204	0	30	26.1622	23.5388	100001	100004	100001
37.8	0	0	26.2318	1.33707e-08	4.5225e-15	16.9204	0	30	26.1622	23.5388	100001	100004	100001
37.85	0	0	26.2318	1.2855e-08	4.23259e-15	16.9204	0	30	26.1622	23.5388	100001	100004	100001
37.9	0	0	26.2318	1.23591e-08	3.96012e-15	16.9204	0	30	26.1622	23.5388	100001	100004	100001
37.95	0	0	26.2318	1.18824e-08	3.70457e-15	16.9204	0	30	26.1622	23.5388	100001	100004	100001
38	0	0	26.2318	1.14239e-08	3.4656e-15	16.9204	0	30	26.1622	23.5388	100001	100004	100001
38.05	0	0	26.2318	1.09832e-08	3.24069e-15	16.9204	0	30	26.1622	23.5388	100001	100004	100001
38.1	0	0	26.2318	1.05595e-08	3.02838e-15	16.9204	0	30	26.1622	23.5388	100001	100004	100001
38.15	0	0	26.2318	1.01522e-08	2.82917e-15	16.9204	0	30	26.1622	23.5388	100001	100004	100001
38.2	0	0	26.2318	9.76056e-09	2.64245e-15	16.9204	0	30	26.1622	23.5388	100001	100004	100001
38.25	0	0	26.2318	9.38407e-09	2.46762e-15	16.9204	0	30	26.1622	23.5388	100001	100004	100001
38.3	0	0	26.2318	9.02212e-09	2.30413e-15	16.9204	0	30	26.1622	23.5388	100001	100004	100001
38.35	0	0	26.2318	8.67416e-09	2.15156e-15	16.9204	0	30	26.1622	23.5388	100001	100004	100001
38.4	0	0	26.2318	8.33963e-09	2.00958e-15	16.9204	0	30	26.1622	23.5388	100001	100004	100001
38.45	0	0	26.2318	8.01802e-09	1.87758e-15	16.9204	0	30	26.1622	23.5388	100001	100004	100001
38.5	0	0	26.2318	7.70881e-09	1.75506e-15	16.9204	0	30	26.1622	23.5388	100001	100004	100001
38.55	0	0	26.2318	7.41151e-09	1.64153e-15	16.9204	0	30	26.1622	23.5388	100001	100004	100001
38.6	0	0	26.2318	7.12565e-09	1.53645e-15	16.9204	0	30	26.1622	23.5388	100001	100004	100001
38.65	0	0	26.2318	6.85085e-09	1.4397e-15	16.9204	0	30	26.1622	23.5388	100001	100004	100001
38.7	0	0	26.2318	6.58698e-09	1.35178e-15	16.9204	0	30	26.1622	23.5388	100001	100004	100001
38.75	0	0	26.2318	6.33342e-09	1.27145e-15	16.9204	0	30	26.1622	23.5388	100001	100004	100001
38.8	0	0	26.2318	6.08977e-09	1.19818e-15	16.9204	0	30	26.1622	23.5388	100001	100004	100001
38.85	0	0	26.2318	5.85566e-09	1.13135e-15	16.9204	0	30	26.1622	23.5388	100001	100004	100001
38.9	0	0	26.2318	5.63069e-09	1.07028e-15	16.9204	0	30	26.1622	23.5388	100001	100004	100001
38.95	0	0	26.2318	5.41448e-09	1.0142e-15	16.9204	0	30	26.1622	23.5388	100001	100004	100001
39	0	0	26.2318	5.20665e-09	9.62214e-16	16.9204	0	30	26.1622	23.5388	100001	100004	100001
39.05	0	0	26.2318	5.00683e-09	9.13336e-16	16.9204	0	30	26.1622	23.5388	100001	100004	100001
39.1	0	0	26.2318	4.81462e-09	8.66445e-16	16.9204	0	30	26.1622	23.5388	100001	100004	100001
39.15	0	0	26.2318	4.62964e-09	8.20286e-16	16.9204	0	30	26.1622	23.5388	100001	100004	100001
39.2	0	0	26.2318	4.45149e-09	7.73457e-16	16.9204	0	30	26.1622	23.5388	100001	100004	100001
39.25	0	0	26.2318	4.27977e-09	7.24394e-16	16.9204	0	30	26.1622	23.5388	100001	100004	100001
39.3	0	0	26.2318	4.11509e-09	6.81768e-16	16.9204	0	30	26.1622	23.5388	100001	100004	100001
39.35	0	0	26.2318	3.95688e-09	6.42154e-16	16.9204	0	30	26.1622	23.5388	100001	100004	100001
39.4	0	0	26.2318	3.80468e-09	6.03286e-16	16.9204	0	30	26.1622	23.5388	100001	100004	100001
39.45	0	0	26.2318	3.65823e-09	5.65028e-16	16.9204	0	30	26.1622	23.5388	100001	100004	100001
39.5	0	0	26.2318	3.51732e-09	5.27333e-16	16.9204	0	30	26.1622	23.5388	100001	100004	100001
39.55	0	0	26.2318	3.3817e-09	4.90251e-16	16.9204	0	30	26.1622	23.5388	100001	100004	100001
39.6	0	0	26.2318	3.25118e-09	4.53928e-16	16.9204	0	30	26.1622	23.5388	100001	100004	100001
39.65	0	0	26.2318	3.12558e-09	4.18339e-16	16.9204	0	30	26.1622	23.5388	100001	100004	100001
39.7	0	0	26.2318	3.00479e-09	3.82913e-16	16.9204	0	30	26.1622	23.5388	100001	100004	100001
39.75	0	0	26.2318	2.88861e-09	3.48589e-16	16.9204	0	30	26.1622	23.5388	100001	100004	100001
39.8	0	0	26.2318	2.77686e-09	3.1579e-16	16.9204	0	30	26.1622	23.5388	100001	100004	100001
39.85	0	0	26.2318	2.66943e-09	2.85048e-16	16.9204	0	30	26.1622	23.5388	100001	100004	100001
39.9	0	0	26.2318	2.56618e-09	2.5701e-16	16.9204	0	30	26.1622	23.5388	100001	100004	100001
39.95	0	0	26.2318	2.467e-09	2.32441e-16	16.9204	0	30	26.1622	23.5388	100001	100004	100001
40	0	0	26.2318	2.3718e-09	2.12233e-16	16.9204	0	30	26.1622	23.5388	100001	100004	100001
40.05	0	0	26.2318	2.28016e-09	1.91915e-16	16.9204	0	30	26.1622	23.5388	100001	100004	100001
40.1	0	0	26.2318	2.19199e-09	1.72237e-16	16.9204	0	30	26.1622	23.5388	100001	100004	100001
40.15	0	0	26.2318	2.10725e-09	1.54997e-16	16.9204	0	30	26.1622	23.5388	100001	100004	100001
40.2	0	0	26.2318	2.02582e-09	1.40315e-16	16.9204	0	30	26.1622	23.5388	100001	100004	100001
40.25	0	0	26.2318	1.94759e-09	1.28293e-16	16.9204	0	30	26.1622	23.5388	100001	100004	100001
40.3	0	0	26.2318	1.87242e-09	1.19002e-16	16.9204	0	30	26.1622	23.5388	100001	100004	100001
40.35	0	0	26.2318	1.8002e-09	1.12485e-16	16.9204	0	30	26.1622	23.5388	100001	100004	100001
40.4	0	0	26.2318	1.73081e-09	1.08373e-16	16.9204	0	30	26.1622	23.5388	100001	100004	100001
40.45	0	0	26.2318	1.66417e-09	1.04506e-16	16.9204	0	30	26.1622	23.5388	100001	100004	100001
40.5	0	0	26.2318	1.60015e-09	1.0178e-16	16.9204	0	30	26.1622	23.5388	100001	100004	100001
40.55	0	0	26.2318	1.53864e-09	9.96732e-17	16.9204	0	30	26.1622	23.5388	100001	100004	100001
40.6	0	0	26.2318	1.47951e-09	9.75556e-17	16.9204	0	30	26.1622	23.5388	100001	100004	100001
40.65	0	0	26.2318	1.42266e-09	9.46819e-17	16.9204	0	30	26.1622	23.5388	100001	100004	100001
40.7	0	0	26.2318	1.36797e-09	9.01846e-17	16.9204	0	30	26.1622	23.5388	100001	100004	100001
40.75	0	0	26.2318	1.31532e-09	8.30662e-17	16.9204	0	30	26.1622	23.5388	100001	100004	100001
40.8	0	0	26.2318	1.26476e-09	7.75812e-17	16.9204	0	30	26.1622	23.5388	100001	100004	100001
40.85	0	0	26.2318	1.21623e-09	7.41149e-17	16.9204	0	30	26.1622	23.5388	100001	100004	100001
40.9	0	0	26.2318	1.16956e-09	7.01777e-17	16.9204	0	30	26.1622	23.5388	100001	100004	100001
40.95	0	0	26.2318	1.12467e-09	6.56597e-17	16.9204	0	30	26.1622	23.5388	100001	100004	100001
41	0	0	26.2318	1.08148e-09	6.0479e-17	16.9204	0	30	26.1622	23.5388	100001	100004	100001
41.05	0	0	26.2318	1.0399e-09	5.45851e-17	16.9204	0	30	26.1622	23.5388	100001	100004	100001
41.1	0	0	26.2318	9.99855e-10	4.79626e-17	16.9204	0	30	26.1622	23.5388	100001	100004	100001
41.15	0	0	26.2318	9.6128e-10	4.06874e-17	16.9204	0	30	26.1622	23.5388	100001	100004	100001
41.2	0	0	26.2318	9.24248e-10	3.3459e-17	16.9204	0	30	26.1622	23.5388	100001	100004	100001
41.25	0	0	26.2318	8.88615e-10	2.61008e-17	16.9204	0	30	26.1622	23.5388	100001	100004	100001
41.3	0	0	26.2318	8.54329e-10	1.88771e-17	16.9204	0	30	26.1622	23.5388	100001	100004	100001
41.35	0	0	26.2318	8.21341e-10	1.2119e-17	16.9204	0	30	26.1622	23.5388	100001	100004	100001
41.4	0	0	26.2318	7.89611e-10	6.22894e-18	16.9204	0	30	26.1622	23.5388	100001	100004	100001
41.45	0	0	26.2318	7.59096e-10	1.6846e-18	16.9204	0	30	26.1622	23.5388	100001	100004	100001
41.5	0	0	26.2318	7.29764e-10	-9.56398e-19	16.9204	0	30	26.1622	23.5388	100001	100004	100001
41.55	0	0	26.2318	7.0153e-10	-4.33341e-18	16.9204	0	30	26.1622	23.5388	100001	100004	100001
41.6	0	0	26.2318	6.74338e-10	-9.72036e-18	16.9204	0	30	26.1622	23.5388	100001	100004	100001
41.65	0	0	26.2318	6.48181e-10	-1.52053e-17	16.9204	0	30	26.1622	23.5388	100001	100004	100001
41.7	0	0	26.2318	6.23024e-10	-2.09147e-17	16.9204	0	30	26.1622	23.5388	100001	100004	100001
41.75	0	0	26.2318	5.98834e-10	-2.70127e-17	16.9204	0	30	26.1622	23.5388	100001	100004	100001
41.8	0	0	26.2318	5.75579e-10	-3.37045e-17	16.9204	0	30	26.1622	23.5388	100001	100004	100001
41.85	0	0	26.2318	5.5323e-10	-4.12402e-17	16.9204	0	30	26.1622	23.5388	100001	100004	100001
41.9	0	0	26.2318	5.31759e-10	-4.98595e-17	16.9204	0	30	26.1622	23.5388	100001	100004	100001
41.95	0	0	26.2318	5.11101e-10	-5.44456e-17	16.9204	0	30	26.1622	23.5388	100001	100004	100001
42	0	0	26.2318	4.9125e-10	-5.78522e-17	16.9204	0	30	26.1622	23.5388	100001	100004	100001
42.05	0	0	26.2318	4.72176e-10	-5.973e-17	16.9204	0	30	26.1622	23.5388	100001	100004	100001
42.1	0	0	26.2318	4.53852e-10	-5.96798e-17	16.9204	0	30	26.1622	23.5388	100001	100004	100001
42.15	0	0	26.2318	4.36249e-10	-5.72496e-17	16.9204	0	30	26.1622	23.5388	100001	100004	100001
42.2	0	0	26.2318	4.19342e-10	-5.19311e-17	16.9204	0	30	26.1622	23.5388	100001	100004	100001
42.25	0	0	26.2318	4.03103e-10	-4.31571e-17	16.9204	0	30	26.1622	23.5388	100001	100004	100001
42.3	0	0	26.2318	3.8751e-10	-3.44202e-17	16.9204	0	30	26.1622	23.5388	100001	100004	100001
42.35	0	0	26.2318	3.72541e-10	-2.92113e-17	16.9204	0	30	26.1622	23.5388	100001	100004	100001
42.4	0	0	26.2318	3.58167e-10	-2.465e-17	16.9204	0	30	26.1622	23.5388	100001	100004	100001
42.45	0	0	26.2318	3.44363e-10	-2.14594e-17	16.9204	0	30	26.1622	23.5388	100001	100004	100001
42.5	0	0	26.2318	3.31102e-10	-2.04965e-17	16.9204	0	30	26.1622	23.5388	100001	100004	100001
42.55	0	0	26.2318	3.18359e-10	-2.2761e-17	16.9204	0	30	26.1622	23.5388	100001	100004	100001
42.6	0	0	26.2318	3.06107e-10	-2.94042e-17	16.9204	0	30	26.1622	23.5388	100001	100004	100001
42.65	0	0	26.2318	2.94319e-10	-4.17379e-17	16.9204	0	30	26.1622	23.5388	100001	100004	100001
42.7	0	0	26.2318	2.83081e-10	-4.1575e-17	16.9204	0	30	26.1622	23.5388	100001	100004	100001
42.75	0	0	26.2318	2.72313e-10	-3.96632e-17	16.9204	0	30	26.1622	23.5388	100001	100004	100001
42.8	0	0	26.2318	2.61988e-10	-3.7339e-17	16.9204	0	30	26.1622	23.5388	100001	100004	100001
42.85	0	0	26.2318	2.52086e-10	-3.49331e-17	16.9204	0	30	26.1622	23.5388	100001	100004	100001
42.9	0	0	26.2318	2.42584e-10	-3.29245e-17	16.9204	0	30	26.1622	23.5388	100001	100004	100001
42.95	0	0	26.2318	2.33462e-10	-3.19579e-17	16.9204	0	30	26.1622	23.5388	100001	100004	100001
43	0	0	26.2318	2.24695e-10	-3.28612e-17	16.9204	0	30	26.1622	23.5388	100001	100004	100001
43.05	0	0	26.2318	2.16259e-10	-3.66628e-17	16.9204	0	30	26.1622	23.5388	100001	100004	100001
43.1	0	0	26.2318	2.08127e-10	-4.46094e-17	16.9204	0	30	26.1622	23.5388	100001	100004	100001
43.15	0	0	26.2318	2.00272e-10	-5.81835e-17	16.9204	0	30	26.1622	23.5388	100001	100004	100001
43.2	0	0	26.2318	1.92664e-10	-7.91205e-17	16.9204	0	30	26.1622	23.5388	100001	100004	100001
43.25	0	0	26.2318	1.85271e-10	-1.09426e-16	16.9204	0	30	26.1622	23.5388	100001	100004	100001
43.3	0	0	26.2318	1.78167e-10	-1.39796e-16	16.9204	0	30	26.1622	23.5388	100001	100004	100001
43.35	0	0	26.2318	1.71592e-10	-1.43557e-16	16.9204	0	30	26.1622	23.5388	100001	100004	100001
43.4	0	0	26.2318	1.65285e-10	-1.47261e-16	16.9204	0	30	26.1622	23.5388	100001	100004	100001
43.45	0	0	26.2318	1.5923e-10	-1.51425e-16	16.9204	0	30	26.1622	23.5388	100001	100004	100001
43.5	0	0	26.2318	1.5341e-10	-1.56711e-16	16.9204	0	30	26.1622	23.5388	100001	100004	100001
43.55	0	0	26.2318	1.47809e-10	-1.63943e-16	16.9204	0	30	26.1622	23.5388	100001	100004	100001
43.6	0	0	26.2318	1.42407e-10	-1.74114e-16	16.9204	0	30	26.1622	23.5388	100001	100004	100001
43.65	0	0	26.2318	1.37184e-10	-1.88405e-16	16.9204	0	30	26.1622	23.5388	100001	100004	100001
43.7	0	0	26.2318	1.32119e-10	-2.08193e-16	16.9204	0	30	26.1622	23.5388	100001	100004	100001
43.75	0	0	26.2318	1.2719e-10	-2.35064e-16	16.9204	0	30	26.1622	23.5388	100001	100004	100001
43.8	0	0	26.2318	1.22372e-10	-2.70826e-16	16.9204	0	30	26.1622	23.5388	100001	100004	100001
43.85	0	0	26.2318	1.17639e-10	-3.17522e-16	16.9204	0	30	26.1622	23.5388	100001	100004	100001
43.9	0	0	26.2318	1.12963e-10	-3.77442e-16	16.9204	0	30	26.1622	23.5388	100001	100004	100001
43.95	0	0	26.2318	1.08602e-10	-4.2034e-16	16.9204	0	30	26.1622	23.5388	100001	100004	100001
44	0	0	26.2318	1.0455e-10	-4.46247e-16	16.9204	0	30	26.1622	23.5388	100001	100004	100001
44.05	0	0	26.2318	1.00641e-10	-4.73108e-16	16.9204	0	30	26.1622	23.5388	100001	100004	100001
44.1	0	0	26.2318	9.68671e-11	-5.01121e-16	16.9204	0	30	26.1622	23.5388	100001	100004	100001
44.15	0	0	26.2318	9.32197e-11	-5.30528e-16	16.9204	0	30	26.1622	23.5388	100001	100004	100001
44.2	0	0	26.2318	8.96902e-11	-5.61621e-16	16.9204	0	30	26.1622	23.5388	100001	100004	100001
44.25	0	0	26.2318	8.62697e-11	-5.94744e-16	16.9204	0	30	26.1622	23.5388	100001	100004	100001
44.3	0	0	26.2318	8.29491e-11	-6.30296e-16	16.9204	0	30	26.1622	23.5388	100001	100004	100001
44.35	0	0	26.2318	7.97188e-11	-6.68737e-16	16.9204	0	30	26.1622	23.5388	100001	100004	100001
44.4	0	0	26.2318	7.65691e-11	-7.10586e-16	16.9204	0	30	26.1622	23.5388	100001	100004	100001
44.45	0	0	26.2318	7.34898e-11	-7.56432e-16	16.9204	0	30	26.1622	23.5388	100001	100004	100001
44.5	0	0	26.2318	7.04702e-11	-8.06929e-16	16.9204	0	30	26.1622	23.5388	100001	100004	100001
44.55	0	0	26.2318	6.74992e-11	-8.62806e-16	16.9204	0	30	26.1622	23.5388	100001	100004	100001
44.6	0	0	26.2318	6.47595e-11	-9.00256e-16	16.9204	0	30	26.1622	23.5388	100001	100004	100001
44.65	0	0	26.2318	6.21209e-11	-9.35092e-16	16.9204	0	30	26.1622	23.5388	100001	100004	100001
44.7	0	0	26.2318	5.95727e-11	-9.68036e-16	16.9204	0	30	26.1622	23.5388	100001	100004	100001
44.75	0	0	26.2318	5.71133e-11	-9.98639e-16	16.9204	0	30	26.1622	23.5388	100001	100004	100001
44.8	0	0	26.2318	5.47414e-11	-1.02642e-15	16.9204	0	30	26.1622	23.5388	100001	100004	100001
44.85	0	0	26.2318	5.24559e-11	-1.05087e-15	16.9204	0	30	26.1622	23.5388	100001	100004	100001
44.9	0	0	26.2318	5.02561e-11	-1.07143e-15	16.9204	0	30	26.1622	23.5388	100001	100004	100001
44.95	0	0	26.2318	4.81414e-11	-1.08752e-15	16.9204	0	30	26.1622	23.5388	100001	100004	100001
45	0	0	26.2318	4.61116e-11	-1.09851e-15	16.9204	0	30	26.1622	23.5388	100001	100004	100001
45.05	0	0	26.2318	4.41667e-11	-1.10375e-15	16.9204	0	30	26.1622	23.5388	100001	100004	100001
45.1	0	0	26.2318	4.2307e-11	-1.10252e-15	16.9204	0	30	26.1622	23.5388	100001	100004	100001
45.15	0	0	26.2318	4.05329e-11	-1.0941e-15	16.9204	0	30	26.1622	23.5388	100001	100004	100001
45.2	0	0	26.2318	3.88298e-11	-1.08348e-15	16.9204	0	30	26.1622	23.5388	100001	100004	100001
45.25	0	0	26.2318	3.71641e-11	-1.08289e-15	16.9204	0	30	26.1622	23.5388	100001	100004	100001
45.3	0	0	26.2318	3.55663e-11	-1.0804e-15	16.9204	0	30	26.1622	23.5388	100001	100004	100001
45.35	0	0	26.2318	3.40343e-11	-1.07633e-15	16.9204	0	30	26.1622	23.5388	100001	100004	100001
45.4	0	0	26.2318	3.25661e-11	-1.07105e-15	16.9204	0	30	26.1622	23.5388	100001	100004	100001
45.45	0	0	26.2318	3.11597e-11	-1.06498e-15	16.9204	0	30	26.1622	23.5388	100001	100004	100001
45.5	0	0	26.2318	2.98128e-11	-1.05864e-15	16.9204	0	30	26.1622	23.5388	100001	100004	100001
45.55	0	0	26.2318	2.85231e-11	-1.05258e-15	16.9204	0	30	26.1622	23.5388	100001	100004	100001
45.6	0	0	26.2318	2.72881e-11	-1.04744e-15	16.9204	0	30	26.1622	23.5388	100001	100004	100001
45.65	0	0	26.2318	2.61051e-11	-1.04392e-15	16.9204	0	30	26.1622	23.5388	100001	100004	100001
45.7	0	0	26.2318	2.49712e-11	-1.0428e-15	16.9204	0	30	26.1622	23.5388	100001	100004	100001
45.75	0	0	26.2318	2.38834e-11	-1.04493e-15	16.9204	0	30	26.1622	23.5388	100001	100004	100001
45.8	0	0	26.2318	2.28384e-11	-1.05127e-15	16.9204	0	30	26.1622	23.5388	100001	100004	100001
45.85	0	0	26.2318	2.1863e-11	-1.04216e-15	16.9204	0	30	26.1622	23.5388	100001	100004	100001
45.9	0	0	26.2318	2.09545e-11	-1.01801e-15	16.9204	0	30	26.1622	23.5388	100001	100004	100001
45.95	0	0	26.2318	2.0096e-11	-9.88707e-16	16.9204	0	30	26.1622	23.5388	100001	100004	100001
46	0	0	26.2318	1.92861e-11	-9.53578e-16	16.9204	0	30	26.1622	23.5388	100001	100004	100001
46.05	0	0	26.2318	1.85233e-11	-9.11889e-16	16.9204	0	30	26.1622	23.5388	100001	100004	100001
46.1	0	0	26.2318	1.78059e-11	-8.62833e-16	16.9204	0	30	26.1622	23.5388	100001	100004	100001
46.15	0	0	26.2318	1.71323e-11	-8.05529e-16	16.9204	0	30	26.1622	23.5388	100001	100004	100001
46.2	0	0	26.2318	1.65006e-11	-7.39018e-16	16.9204	0	30	26.1622	23.5388	100001	100004	100001
46.25	0	0	26.2318	1.59089e-11	-6.62262e-16	16.9204	0	30	26.1622	23.5388	100001	100004	100001
46.3	0	0	26.2318	1.53552e-11	-5.74138e-16	16.9204	0	30	26.1622	23.5388	100001	100004	100001
46.35	0	0	26.2318	1.48374e-11	-4.73438e-16	16.9204	0	30	26.1622	23.5388	100001	100004	100001
46.4	0	0	26.2318	1.43531e-11	-3.58865e-16	16.9204	0	30	26.1622	23.5388	100001	100004	100001
46.45	0	0	26.2318	1.39e-11	-2.29027e-16	16.9204	0	30	26.1622	23.5388	100001	100004	100001
46.5	0	0	26.2318	1.34733e-11	-1.55554e-16	16.9204	0	30	26.1622	23.5388	100001	100004	100001
46.55	0	0	26.2318	1.30717e-11	-9.09987e-17	16.9204	0	30	26.1622	23.5388	100001	100004	100001
46.6	0	0	26.2318	1.26921e-11	-3.54166e-17	16.9204	0	30	26.1622	23.5388	100001	100004	100001
46.65	0	0	26.2318	1.23314e-11	8.61051e-18	16.9204	0	30	26.1622	23.5388	100001	100004	100001
46.7	0	0	26.2318	1.19862e-11	3.82509e-17	16.9204	0	30	26.1622	23.5388	100001	100004	100001
46.75	0	0	26.2318	1.16529e-11	5.04135e-17	16.9204	0	30	26.1622	23.5388	100001	100004	100001
46.8	0	0	26.2318	1.13276e-11	4.17385e-17	16.9204	0	30	26.1622	23.5388	100001	100004	100001
46.85	0	0	26.2318	1.10062e-11	8.58755e-18	16.9204	0	30	26.1622	23.5388	100001	100004	100001
46.9	0	0	26.2318	1.06846e-11	-5.29658e-17	16.9204	0	30	26.1622	23.5388	100001	100004	100001
46.95	0	0	26.2318	1.03581e-11	-1.47145e-16	16.9204	0	30	26.1622	23.5388	100001	100004	100001
47	0	0	26.2318	1.00219e-11	-2.78483e-16	16.9204	0	30	26.1622	23.5388	100001	100004	100001
47.05	0	0	26.2318	9.6711e-12	-4.51826e-16	16.9204	0	30	26.1622	23.5388	100001	100004	100001
47.1	0	0	26.2318	9.31128e-12	-6.47956e-16	16.9204	0	30	26.1622	23.5388	100001	100004	100001
47.15	0	0	26.2318	8.97025e-12	-7.98635e-16	16.9204	0	30	26.1622	23.5388	100001	100004	100001
47.2	0	0	26.2318	8.63392e-12	-9.27794e-16	16.9204	0	30	26.1622	23.5388	100001	100004	100001
47.25	0	0	26.2318	8.30632e-12	-1.01908e-15	16.9204	0	30	26.1622	23.5388	100001	100004	100001
47.3	0	0	26.2318	7.99253e-12	-1.05343e-15	16.9204	0	30	26.1622	23.5388	100001	100004	100001
47.35	0	0	26.2318	7.69879e-12	-1.00892e-15	16.9204	0	30	26.1622	23.5388	100001	100004	100001
47.4	0	0	26.2318	7.43254e-12	-8.60624e-16	16.9204	0	30	26.1622	23.5388	100001	100004	100001
47.45	0	0	26.2318	7.14739e-12	-8.07448e-16	16.9204	0	30	26.1622	23.5388	100001	100004	100001
47.5	0	0	26.2318	6.86416e-12	-7.73613e-16	16.9204	0	30	26.1622	23.5388	100001	100004	100001
47.55	0	0	26.2318	6.58598e-12	-7.58529e-16	16.9204	0	30	26.1622	23.5388	100001	100004	100001
47.6	0	0	26.2318	6.31128e-12	-7.83507e-16	16.9204	0	30	26.1622	23.5388	100001	100004	100001
47.65	0	0	26.2318	6.03788e-12	-8.7474e-16	16.9204	0	30	26.1622	23.5388	100001	100004	100001
47.7	0	0	26.2318	5.76301e-12	-1.06367e-15	16.9204	0	30	26.1622	23.5388	100001	100004	100001
47.75	0	0	26.2318	5.49945e-12	-1.22796e-15	16.9204	0	30	26.1622	23.5388	100001	100004	100001
47.8	0	0	26.2318	5.25916e-12	-1.25226e-15	16.9204	0	30	26.1622	23.5388	100001	100004	100001
47.85	0	0	26.2318	5.0326e-12	-1.22995e-15	16.9204	0	30	26.1622	23.5388	100001	100004	100001
47.9	0	0	26.2318	4.82199e-12	-1.13765e-15	16.9204	0	30	26.1622	23.5388	100001	100004	100001
47.95	0	0	26.2318	4.62985e-12	-9.46766e-16	16.9204	0	30	26.1622	23.5388	100001	100004	100001
48	0	0	26.2318	4.45903e-12	-6.23162e-16	16.9204	0	30	26.1622	23.5388	100001	100004	100001
48.05	0	0	26.2318	4.30712e-12	-1.84433e-16	16.9204	0	30	26.1622	23.5388	100001	100004	100001

## Sheet: RI_BH4
Time	RI	FP	BH	fructose	formate	acetate	butyrate	unknown compound	H20	CO2	lag_RI	lag_FP	lag_BH
0.05	2.37719	0	0.237771	45.3978	1.07316	43.7026	2.02617	30	0.0615524	0.0949537	1.03873	0.112733	0.110518
0.1	2.39946	0	0.238243	45.3836	1.07458	43.697	2.04009	30	0.0753823	0.113189	1.07896	0.127088	0.122141
0.15	2.42234	0	0.238759	45.3689	1.07604	43.6912	2.05439	30	0.0896291	0.131961	1.12075	0.14327	0.134987
0.2	2.44586	0	0.239325	45.3537	1.07754	43.6854	2.06909	30	0.104304	0.151283	1.16416	0.161513	0.149184
0.25	2.47002	0	0.239943	45.338	1.07907	43.6794	2.08419	30	0.119419	0.171168	1.20925	0.182078	0.164873
0.3	2.49484	0	0.240618	45.3217	1.08064	43.6732	2.0997	30	0.134985	0.191631	1.25609	0.205262	0.182214
0.35	2.52033	0	0.241354	45.3049	1.08224	43.6669	2.11563	30	0.151016	0.212685	1.30474	0.231398	0.201377
0.4	2.5465	0	0.242157	45.2874	1.08388	43.6605	2.13199	30	0.167523	0.234347	1.35527	0.260862	0.222557
0.45	2.57337	0	0.243031	45.2694	1.08556	43.6539	2.14878	30	0.184519	0.25663	1.40776	0.294078	0.245963
0.5	2.60095	0	0.243982	45.2508	1.08727	43.6472	2.16602	30	0.202018	0.279549	1.46229	0.331523	0.271832
0.55	2.62925	0	0.245014	45.2315	1.08902	43.6404	2.18371	30	0.220032	0.303121	1.51892	0.373735	0.300421
0.6	2.65829	0	0.246133	45.2115	1.0908	43.6334	2.20186	30	0.238575	0.32736	1.57775	0.421323	0.332016
0.65	2.68808	0	0.247345	45.1908	1.09263	43.6263	2.22048	30	0.25766	0.352282	1.63886	0.47497	0.366935
0.7	2.71864	0	0.248654	45.1694	1.09449	43.619	2.23957	30	0.277301	0.377903	1.70233	0.535448	0.405526
0.75	2.74997	0	0.250068	45.1472	1.09638	43.6116	2.25915	30	0.297513	0.404239	1.76827	0.603626	0.448176
0.8	2.78208	0	0.251591	45.1243	1.09832	43.604	2.27923	30	0.318307	0.431305	1.83676	0.680486	0.495312
0.85	2.81501	0	0.253229	45.1005	1.10028	43.5963	2.29981	30	0.3397	0.459118	1.9079	0.767132	0.547405
0.9	2.84875	0	0.254988	45.076	1.10229	43.5885	2.32089	30	0.361703	0.487694	1.98179	0.864811	0.604976
0.95	2.88332	0	0.256872	45.0506	1.10433	43.5805	2.3425	30	0.384331	0.517048	2.05855	0.974927	0.668603
1	2.91874	0	0.258887	45.0243	1.10642	43.5724	2.36464	30	0.407597	0.547197	2.13828	1.09906	0.738921
1.05	2.95502	0	0.261037	44.9971	1.10853	43.5641	2.38731	30	0.431515	0.578155	2.2211	1.23901	0.816634
1.1	2.99217	0	0.263328	44.9691	1.11069	43.5557	2.41053	30	0.456096	0.609938	2.30712	1.39677	0.902521
1.15	3.03021	0	0.265763	44.9401	1.11288	43.5471	2.43431	30	0.481355	0.642561	2.39648	1.57462	0.997441
1.2	3.06915	0	0.268346	44.9101	1.11511	43.5384	2.45865	30	0.507303	0.676039	2.4893	1.77512	1.10234
1.25	3.10901	0	0.27108	44.8792	1.11738	43.5295	2.48356	30	0.533952	0.710386	2.58571	2.00114	1.21828
1.3	3.1498	0	0.273969	44.8473	1.11969	43.5205	2.50905	30	0.561314	0.745617	2.68586	2.25595	1.34641
1.35	3.19153	0	0.277015	44.8144	1.12203	43.5114	2.53513	30	0.5894	0.781745	2.78989	2.5432	1.48801
1.4	3.23423	0	0.28022	44.7805	1.12442	43.502	2.56182	30	0.618222	0.818785	2.89794	2.86702	1.64451
1.45	3.27789	0	0.283586	44.7455	1.12685	43.4925	2.58911	30	0.647789	0.856749	3.01018	3.23208	1.81746
1.5	3.32255	0	0.287115	44.7095	1.12931	43.4829	2.61702	30	0.678111	0.89565	3.12677	3.64362	2.00861
1.55	3.36821	0	0.290806	44.6725	1.13182	43.4731	2.64556	30	0.7092	0.935502	3.24787	4.10757	2.21986
1.6	3.41489	0	0.294661	44.6344	1.13437	43.4631	2.67473	30	0.741064	0.976316	3.37367	4.63058	2.45333
1.65	3.46261	0	0.298681	44.5952	1.13696	43.453	2.70456	30	0.773712	1.01811	3.50433	5.22019	2.71135
1.7	3.51137	0	0.302865	44.5549	1.1396	43.4426	2.73503	30	0.807155	1.06088	3.64006	5.88488	2.9965
1.75	3.5612	0	0.307213	44.5136	1.14228	43.4321	2.76618	30	0.8414	1.10466	3.78105	6.6342	3.31165
1.8	3.61211	0	0.311724	44.4711	1.14501	43.4215	2.798	30	0.876457	1.14945	3.92749	7.47893	3.65994
1.85	3.66412	0	0.316398	44.4276	1.14778	43.4106	2.8305	30	0.912334	1.19526	4.07961	8.43122	4.04487
1.9	3.71723	0	0.321235	44.3829	1.15061	43.3995	2.8637	30	0.949041	1.2421	4.23762	9.50477	4.47027
1.95	3.77148	0	0.326233	44.3371	1.15348	43.3882	2.8976	30	0.986585	1.29	4.40174	10.715	4.94042
2	3.82686	0	0.331393	44.2902	1.1564	43.3768	2.93221	30	1.02498	1.33895	4.57223	12.0794	5.46001
2.05	3.88341	0	0.336711	44.2422	1.15937	43.3651	2.96756	30	1.06422	1.38897	4.74932	13.6174	6.03425
2.1	3.94113	0	0.342189	44.193	1.16239	43.3532	3.00363	30	1.10433	1.44008	4.93326	15.3513	6.66889
2.15	4.00004	0	0.347826	44.1427	1.16546	43.3411	3.04045	30	1.14531	1.49228	5.12433	17.306	7.37026
2.2	4.06016	0	0.353619	44.0912	1.16859	43.3288	3.07802	30	1.18718	1.54559	5.32281	19.5096	8.14541
2.25	4.1215	0	0.35957	44.0386	1.17177	43.3162	3.11636	30	1.22994	1.60002	5.52897	21.9937	9.00208
2.3	4.18408	0	0.365676	43.9848	1.17501	43.3034	3.15548	30	1.27359	1.65558	5.74311	24.7942	9.94884
2.35	4.24792	0	0.371938	43.9298	1.1783	43.2904	3.19538	30	1.31816	1.71229	5.96555	27.9512	10.9952
2.4	4.31304	0	0.378355	43.8737	1.18165	43.2772	3.23608	30	1.36364	1.77016	6.1966	31.5102	12.1516
2.45	4.37945	0	0.384927	43.8163	1.18506	43.2637	3.27758	30	1.41006	1.8292	6.4366	35.5224	13.4296
2.5	4.44716	0	0.391653	43.7578	1.18852	43.2499	3.3199	30	1.45742	1.88942	6.6859	40.0455	14.842
2.55	4.5162	0	0.398534	43.698	1.19205	43.2359	3.36305	30	1.50572	1.95085	6.94485	45.1445	16.4029
2.6	4.58659	0	0.40557	43.6371	1.19564	43.2217	3.40704	30	1.55499	2.01349	7.21384	50.8927	18.1281
2.65	4.65833	0	0.41276	43.5749	1.19929	43.2072	3.45188	30	1.60523	2.07736	7.49324	57.3729	20.0346
2.7	4.73146	0	0.420105	43.5114	1.203	43.1924	3.49759	30	1.65644	2.14247	7.78346	64.6782	22.1417
2.75	4.80598	0	0.427605	43.4467	1.20678	43.1773	3.54416	30	1.70866	2.20883	8.08492	72.9137	24.4704
2.8	4.88191	0	0.435261	43.3808	1.21062	43.162	3.59162	30	1.76187	2.27647	8.39806	82.1977	27.044
2.85	4.95928	0	0.443073	43.3135	1.21452	43.1464	3.63998	30	1.81611	2.34539	8.72333	92.664	29.8882
2.9	5.0381	0	0.451043	43.245	1.2185	43.1305	3.68924	30	1.87137	2.41562	9.06119	104.463	33.0316
2.95	5.11838	0	0.45917	43.1752	1.22253	43.1143	3.73942	30	1.92767	2.48717	9.41214	117.764	36.5056
3	5.20016	0	0.467456	43.1041	1.22664	43.0979	3.79052	30	1.98502	2.56004	9.77669	132.759	40.345
3.05	5.28344	0	0.475902	43.0316	1.23081	43.0811	3.84257	30	2.04343	2.63427	10.1554	149.663	44.5881
3.1	5.36824	0	0.484509	42.9578	1.23505	43.0641	3.89558	30	2.10292	2.70986	10.5487	168.72	49.2776
3.15	5.45459	0	0.493278	42.8826	1.23936	43.0467	3.94954	30	2.1635	2.78683	10.9572	190.203	54.4602
3.2	5.5425	0	0.502211	42.8061	1.24374	43.0291	4.00449	30	2.22517	2.86519	11.3816	214.421	60.1878
3.25	5.63199	0	0.511308	42.7282	1.2482	43.0111	4.06042	30	2.28797	2.94497	11.8225	241.724	66.5179
3.3	5.72308	0	0.520571	42.6489	1.25272	42.9928	4.11735	30	2.35188	3.02618	12.2804	272.502	73.5137
3.35	5.81579	0	0.530001	42.5682	1.25731	42.9742	4.17529	30	2.41694	3.10884	12.756	307.2	81.2453
3.4	5.91014	0	0.539601	42.486	1.26198	42.9553	4.23426	30	2.48315	3.19296	13.25	346.316	89.79
3.45	6.00614	0	0.549372	42.4024	1.26672	42.936	4.29427	30	2.55052	3.27855	13.7632	390.412	99.2334
3.5	6.10383	0	0.559314	42.3174	1.27153	42.9164	4.35532	30	2.61908	3.36565	14.2963	440.123	109.67
3.55	6.20321	0	0.569431	42.2308	1.27642	42.8965	4.41743	30	2.68882	3.45426	14.85	496.164	121.204
3.6	6.30431	0	0.579724	42.1428	1.28138	42.8763	4.48062	30	2.75977	3.5444	15.4252	559.341	133.951
3.65	6.40714	0	0.590194	42.0533	1.28642	42.8557	4.54489	30	2.83194	3.63609	16.0226	630.561	148.039
3.7	6.51173	0	0.600844	41.9622	1.29154	42.8348	4.61026	30	2.90535	3.72935	16.6432	710.85	163.609
3.75	6.61809	0	0.611675	41.8696	1.29672	42.8135	4.67673	30	2.98	3.82419	17.2878	801.363	180.816
3.8	6.72625	0	0.622689	41.7755	1.30199	42.7919	4.74433	30	3.05591	3.92063	17.9574	903.4	199.833
3.85	6.83623	0	0.633888	41.6797	1.30733	42.7699	4.81307	30	3.13309	4.01869	18.6529	1018.43	220.849
3.9	6.94804	0	0.645274	41.5824	1.31275	42.7475	4.88295	30	3.21156	4.11838	19.3753	1148.11	244.076
3.95	7.0617	0	0.65685	41.4835	1.31825	42.7248	4.95399	30	3.29134	4.21973	20.1258	1294.3	269.746
4	7.17724	0	0.668616	41.383	1.32382	42.7017	5.0262	30	3.37242	4.32275	20.9053	1459.1	298.116
4.05	7.29467	0	0.680576	41.2808	1.32947	42.6783	5.09959	30	3.45484	4.42746	21.715	1644.88	329.469
4.1	7.41401	0	0.692731	41.1769	1.3352	42.6545	5.17418	30	3.5386	4.53387	22.556	1854.33	364.12
4.15	7.53529	0	0.705083	41.0714	1.34101	42.6303	5.24998	30	3.62372	4.64201	23.4296	2090.44	402.416
4.2	7.65852	0	0.717634	40.9642	1.3469	42.6057	5.327	30	3.71021	4.75189	24.3371	2356.61	444.738
4.25	7.78372	0	0.730386	40.8553	1.35287	42.5808	5.40525	30	3.79808	4.86353	25.2797	2656.68	491.512
4.3	7.91091	0	0.743342	40.7446	1.35891	42.5554	5.48474	30	3.88735	4.97694	26.2588	2994.96	543.205
4.35	8.04011	0	0.756503	40.6322	1.36504	42.5297	5.5655	30	3.97804	5.09215	27.2758	3376.3	600.335
4.4	8.17135	0	0.769872	40.5181	1.37124	42.5036	5.64752	30	4.07014	5.20917	28.3323	3806.21	663.474
4.45	8.30463	0	0.783451	40.4022	1.37753	42.4771	5.73082	30	4.16369	5.32801	29.4296	4290.85	733.252
4.5	8.43997	0	0.797241	40.2845	1.38389	42.4502	5.81541	30	4.25869	5.4487	30.5694	4837.21	810.37
4.55	8.57741	0	0.811245	40.165	1.39033	42.4228	5.90131	30	4.35516	5.57125	31.7534	5453.13	895.598
4.6	8.71695	0	0.825465	40.0436	1.39685	42.3951	5.98852	30	4.4531	5.69568	32.9833	6147.47	989.79
4.65	8.85861	0	0.839902	39.9204	1.40345	42.367	6.07706	30	4.55253	5.82201	34.2608	6930.23	1093.89
4.7	9.00242	0	0.85456	39.7954	1.41013	42.3385	6.16694	30	4.65347	5.95024	35.5877	7812.65	1208.93
4.75	9.14838	0	0.869439	39.6685	1.41689	42.3095	6.25816	30	4.75593	6.0804	36.9661	8807.44	1336.08
4.8	9.29652	0	0.884542	39.5397	1.42372	42.2801	6.35075	30	4.85992	6.21251	38.3978	9928.89	1476.6
4.85	9.44685	0	0.899871	39.409	1.43064	42.2504	6.44471	30	4.96545	6.34657	39.885	11193.1	1631.89
4.9	9.5994	0	0.915427	39.2764	1.43763	42.2201	6.54005	30	5.07253	6.48261	41.4298	12618.4	1803.52
4.95	9.75417	0	0.931214	39.1419	1.4447	42.1895	6.63678	30	5.18118	6.62063	43.0345	14225	1993.2
5	9.91119	0	0.947231	39.0054	1.45184	42.1585	6.73492	30	5.29141	6.76066	44.7012	16036.3	2202.83
5.05	10.0705	0	0.963482	38.867	1.45906	42.127	6.83447	30	5.40323	6.90271	46.4326	18078.2	2434.51
5.1	10.232	0	0.979968	38.7266	1.46636	42.0951	6.93544	30	5.51665	7.04679	48.231	20380.1	2690.55
5.15	10.3959	0	0.996691	38.5842	1.47374	42.0627	7.03784	30	5.63168	7.19292	50.099	22975.1	2973.52
5.2	10.562	0	1.01365	38.4399	1.48118	42.0299	7.14169	30	5.74833	7.34111	52.0394	25900.5	3286.25
5.25	10.7305	0	1.03085	38.2935	1.4887	41.9967	7.24698	30	5.86661	7.49137	54.055	29198.5	3631.87
5.3	10.9013	0	1.0483	38.1451	1.4963	41.963	7.35373	30	5.98654	7.64371	56.1486	32916.3	4013.84
5.35	11.0744	0	1.06599	37.9946	1.50397	41.9289	7.46196	30	6.10812	7.79815	58.3233	37107.5	4435.98
5.4	11.25	0	1.08392	37.8422	1.51171	41.8944	7.57165	30	6.23136	7.9547	60.5822	41832.4	4902.52
5.45	11.4278	0	1.1021	37.6876	1.51951	41.8594	7.68283	30	6.35627	8.11337	62.9286	47158.9	5418.13
5.5	11.6081	0	1.12052	37.531	1.52739	41.8239	7.7955	30	6.48286	8.27417	65.3659	53163.7	5987.96
5.55	11.7908	0	1.1392	37.3724	1.53534	41.7881	7.90967	30	6.61114	8.43711	67.8976	59933	6617.73
5.6	11.9759	0	1.15813	37.2116	1.54335	41.7517	8.02534	30	6.74111	8.60221	70.5274	67564.2	7313.73
5.65	12.1634	0	1.1773	37.0488	1.55143	41.715	8.14252	30	6.87278	8.76946	73.259	76167.2	8082.92
5.7	12.3533	0	1.19673	36.8838	1.55958	41.6777	8.26122	30	7.00616	8.93888	76.0964	85865.6	8933.02
5.75	12.5456	0	1.21642	36.7168	1.56779	41.6401	8.38143	30	7.14125	9.11047	79.0437	96798.7	9872.52
5.8	12.7404	0	1.23636	36.5476	1.57606	41.6019	8.50318	30	7.27807	9.28425	82.1053	100000	10910.9
5.85	12.9376	0	1.25655	36.3764	1.58438	41.5634	8.62645	30	7.4166	9.46022	85.2853	100000	12058.4
5.9	13.1373	0	1.27701	36.203	1.59277	41.5243	8.75126	30	7.55687	9.63838	88.5885	100000	13326.7
5.95	13.3395	0	1.29771	36.0275	1.60122	41.4848	8.8776	30	7.69887	9.81873	92.0197	100000	14728.3
6	13.5441	0	1.31868	35.8499	1.60972	41.4449	9.00549	30	7.8426	10.0013	95.5837	100000	16277.3
6.05	13.7512	0	1.33991	35.6701	1.61827	41.4045	9.13491	30	7.98808	10.1861	99.2858	100000	17989.3
6.1	13.9607	0	1.36139	35.4882	1.62688	41.3637	9.26588	30	8.13529	10.373	103.131	100000	19881.3
6.15	14.1728	0	1.38313	35.3042	1.63553	41.3224	9.3984	30	8.28425	10.5622	107.126	100000	21972.3
6.2	14.3872	0	1.40514	35.118	1.64424	41.2807	9.53246	30	8.43495	10.7536	111.275	100000	24283.1
6.25	14.6042	0	1.4274	34.9297	1.65298	41.2385	9.66806	30	8.58739	10.9472	115.585	100000	26837
6.3	14.8236	0	1.44992	34.7393	1.66177	41.1959	9.80521	30	8.74158	11.1431	120.061	100000	29659.5
6.35	15.0456	0	1.4727	34.5468	1.67061	41.1529	9.9439	30	8.8975	11.3411	124.711	100000	32778.9
6.4	15.2699	0	1.49574	34.3521	1.67947	41.1094	10.0841	30	9.05516	11.5413	129.542	100000	36226.3
6.45	15.4967	0	1.51904	34.1554	1.68838	41.0654	10.2259	30	9.21455	11.7437	134.559	100000	40036.4
6.5	15.726	0	1.5426	33.9565	1.69732	41.0211	10.3692	30	9.37568	11.9484	139.771	100000	44247.2
6.55	15.9578	0	1.56641	33.7555	1.70629	40.9762	10.514	30	9.53853	12.1552	145.184	100000	48900.8
6.6	16.1919	0	1.59049	33.5524	1.71528	40.931	10.6604	30	9.7031	12.3642	150.807	100000	54043.7
6.65	16.4285	0	1.61482	33.3472	1.7243	40.8853	10.8082	30	9.86938	12.5753	156.648	100000	59727.6
6.7	16.6675	0	1.6394	33.14	1.73334	40.8392	10.9576	30	10.0374	12.7887	162.715	100000	66009.2
6.75	16.9089	0	1.66424	32.9307	1.7424	40.7927	11.1085	30	10.2071	13.0042	169.018	100000	72951.4
6.8	17.1527	0	1.68933	32.7194	1.75148	40.7458	11.2609	30	10.3784	13.2218	175.564	100000	80623.8
6.85	17.3989	0	1.71467	32.506	1.76056	40.6985	11.4147	30	10.5515	13.4415	182.364	100000	89103.1
6.9	17.6474	0	1.74027	32.2906	1.76966	40.6507	11.5701	30	10.7262	13.6634	189.427	100000	98474.2
6.95	17.8983	0	1.76611	32.0732	1.77876	40.6025	11.7269	30	10.9026	13.8873	196.764	100000	100003
7	18.1515	0	1.7922	31.8538	1.78786	40.554	11.8851	30	11.0806	14.1134	204.385	100000	100003
7.05	18.407	0	1.81853	31.6324	1.79696	40.505	12.0448	30	11.2602	14.3415	212.301	100000	100003
7.1	18.6648	0	1.8451	31.4091	1.80606	40.4557	12.2059	30	11.4414	14.5716	220.524	100000	100003
7.15	18.9248	0	1.87192	31.1839	1.81514	40.406	12.3684	30	11.6243	14.8038	229.065	100000	100003
7.2	19.1871	0	1.89897	30.9568	1.82422	40.3559	12.5323	30	11.8087	15.0379	237.937	100000	100003
7.25	19.4515	0	1.92625	30.7278	1.83327	40.3054	12.6976	30	11.9946	15.2741	247.153	100000	100003
7.3	19.7182	0	1.95377	30.497	1.8423	40.2546	12.8643	30	12.1821	15.5121	256.726	100000	100003
7.35	19.987	0	1.98152	30.2643	1.85131	40.2034	13.0323	30	12.3712	15.7521	266.67	100000	100003
7.4	20.2579	0	2.00949	30.0299	1.86029	40.1519	13.2016	30	12.5617	15.994	276.999	100000	100003
7.45	20.5308	0	2.03769	29.7936	1.86923	40.1	13.3722	30	12.7537	16.2378	287.728	100000	100003
7.5	20.8059	0	2.0661	29.5557	1.87813	40.0478	13.5441	30	12.9471	16.4834	298.873	100000	100003
7.55	21.0829	0	2.09473	29.3161	1.88699	39.9952	13.7172	30	13.1419	16.7308	310.449	100000	100003
7.6	21.3619	0	2.12357	29.0748	1.89581	39.9424	13.8916	30	13.3382	16.9799	322.474	100000	100003
7.65	21.6428	0	2.15262	28.8318	1.90457	39.8892	14.0672	30	13.5358	17.2308	334.965	100000	100003
7.7	21.9256	0	2.18188	28.5873	1.91327	39.8358	14.2439	30	13.7347	17.4834	347.939	100000	100003
7.75	22.2103	0	2.21133	28.3413	1.92191	39.782	14.4219	30	13.935	17.7376	361.416	100000	100003
7.8	22.4967	0	2.24098	28.0937	1.93049	39.728	14.6009	30	14.1365	17.9935	375.415	100000	100003
7.85	22.785	0	2.27082	27.8446	1.93899	39.6737	14.781	30	14.3393	18.2509	389.956	100000	100003
7.9	23.0749	0	2.30084	27.5942	1.94742	39.6191	14.9622	30	14.5432	18.5099	405.06	100000	100003
7.95	23.3665	0	2.33104	27.3423	1.95577	39.5643	15.1445	30	14.7484	18.7703	420.75	100000	100003
8	23.6596	0	2.36142	27.0891	1.96402	39.5093	15.3277	30	14.9547	19.0322	437.047	100000	100003
8.05	23.9544	0	2.39197	26.8347	1.97219	39.454	15.5119	30	15.1621	19.2955	453.975	100000	100003
8.1	24.2506	0	2.42268	26.579	1.98026	39.3985	15.6971	30	15.3705	19.5601	471.559	100000	100003
8.15	24.5483	0	2.45356	26.3221	1.98823	39.3428	15.8831	30	15.58	19.826	489.824	100000	100003
8.2	24.8473	0	2.48458	26.0641	1.99609	39.2869	16.07	30	15.7904	20.0932	508.797	100000	100003
8.25	25.1477	0	2.51576	25.8049	2.00384	39.2308	16.2577	30	16.0018	20.3615	528.504	100000	100003
8.3	25.4493	0	2.54707	25.5448	2.01147	39.1746	16.4463	30	16.2141	20.631	548.975	100000	100003
8.35	25.7522	0	2.57852	25.2837	2.01898	39.1182	16.6355	30	16.4273	20.9016	570.238	100000	100003
8.4	26.0562	0	2.6101	25.0217	2.02636	39.0616	16.8255	30	16.6413	21.1732	592.326	100000	100003
8.45	26.3612	0	2.6418	24.7588	2.0336	39.0049	17.0162	30	16.856	21.4458	615.269	100000	100003
8.5	26.6673	0	2.67362	24.4951	2.04071	38.9481	17.2075	30	17.0714	21.7193	639.1	100000	100003
8.55	26.9743	0	2.70554	24.2306	2.04767	38.8912	17.3993	30	17.2876	21.9936	663.855	100000	100003
8.6	27.2821	0	2.73757	23.9655	2.05449	38.8342	17.5917	30	17.5043	22.2687	689.568	100000	100003
8.65	27.5908	0	2.76969	23.6998	2.06114	38.7772	17.7847	30	17.7216	22.5445	716.277	100000	100003
8.7	27.9002	0	2.80191	23.4335	2.06764	38.72	17.978	30	17.9395	22.821	744.021	100000	100003
8.75	28.2102	0	2.8342	23.1667	2.07398	38.6629	18.1718	30	18.1578	23.0981	772.839	100000	100003
8.8	28.5208	0	2.86656	22.8994	2.08014	38.6056	18.3659	30	18.3765	23.3758	802.774	100000	100003
8.85	28.8319	0	2.89899	22.6319	2.08613	38.5484	18.5604	30	18.5956	23.6538	833.868	100000	100003
8.9	29.1435	0	2.93149	22.364	2.09193	38.4912	18.7551	30	18.815	23.9323	866.167	100000	100003
8.95	29.4554	0	2.96403	22.0959	2.09755	38.4339	18.95	30	19.0347	24.2111	899.717	100000	100003
9	29.7675	0	2.99661	21.8276	2.10298	38.3767	19.1451	30	19.2546	24.4902	934.565	100000	100003
9.05	30.0799	0	3.02923	21.5592	2.10822	38.3196	19.3404	30	19.4746	24.7694	970.765	100000	100003
9.1	30.3924	0	3.06188	21.2908	2.11325	38.2624	19.5357	30	19.6948	25.0488	1008.37	100000	100003
9.15	30.7049	0	3.09455	21.0225	2.11808	38.2054	19.731	30	19.915	25.3282	1047.42	100000	100003
9.2	31.0174	0	3.12723	20.7542	2.1227	38.1484	19.9263	30	20.1351	25.6076	1087.99	100000	100003
9.25	31.3298	0	3.15992	20.4862	2.1271	38.0915	20.1215	30	20.3552	25.8869	1130.13	100000	100003
9.3	31.6419	0	3.1926	20.2184	2.13129	38.0348	20.3166	30	20.5752	26.1661	1173.91	100000	100003
9.35	31.9538	0	3.22527	19.9509	2.13525	37.9782	20.5115	30	20.795	26.445	1219.38	100000	100003
9.4	32.2653	0	3.25792	19.6838	2.13898	37.9217	20.7062	30	21.0145	26.7235	1266.61	100000	100003
9.45	32.5763	0	3.29054	19.4172	2.14248	37.8653	20.9006	30	21.2338	27.0017	1315.67	100000	100003
9.5	32.8868	0	3.32313	19.1511	2.14575	37.8092	21.0947	30	21.4527	27.2795	1366.63	100000	100003
9.55	33.1967	0	3.35567	18.8856	2.14878	37.7532	21.2884	30	21.6712	27.5567	1419.56	100000	100003
9.6	33.5059	0	3.38817	18.6208	2.15156	37.6975	21.4816	30	21.8892	27.8333	1474.55	100000	100003
9.65	33.8143	0	3.4206	18.3567	2.1541	37.6419	21.6744	30	22.1067	28.1092	1531.66	100000	100003
9.7	34.1219	0	3.45296	18.0934	2.15638	37.5866	21.8666	30	22.3236	28.3844	1590.99	100000	100003
9.75	34.4285	0	3.48525	17.8311	2.15842	37.5315	22.0582	30	22.5398	28.6587	1652.61	100000	100003
9.8	34.7341	0	3.51746	17.5696	2.16019	37.4767	22.2492	30	22.7554	28.9322	1716.62	100000	100003
9.85	35.0386	0	3.54958	17.3092	2.16171	37.4222	22.4396	30	22.9702	29.2047	1783.12	100000	100003
9.9	35.3419	0	3.5816	17.0499	2.16296	37.3679	22.6291	30	23.1842	29.4762	1852.18	100000	100003
9.95	35.644	0	3.61351	16.7917	2.16395	37.314	22.8179	30	23.3974	29.7465	1923.92	100000	100003
10	35.9447	0	3.64531	16.5348	2.16467	37.2604	23.0059	30	23.6096	30.0157	1998.44	100000	100003
10.05	36.244	0	3.67698	16.2791	2.16512	37.2071	23.1929	30	23.8208	30.2837	2075.85	100000	100003
10.1	36.5418	0	3.70853	16.0248	2.1653	37.1541	23.379	30	24.0311	30.5503	2156.26	100000	100003
10.15	36.838	0	3.73995	15.7719	2.1652	37.1015	23.5642	30	24.2402	30.8156	2239.77	100000	100003
10.2	37.1326	0	3.77122	15.5204	2.16483	37.0493	23.7483	30	24.4483	31.0794	2326.53	100000	100003
10.25	37.4255	0	3.80234	15.2705	2.16418	36.9974	23.9314	30	24.6551	31.3417	2416.64	100000	100003
10.3	37.7166	0	3.8333	15.0222	2.16326	36.946	24.1133	30	24.8607	31.6025	2510.25	100000	100003
10.35	38.0059	0	3.8641	14.7756	2.16205	36.8949	24.2941	30	25.0651	31.8616	2607.48	100000	100003
10.4	38.2932	0	3.89473	14.5306	2.16057	36.8443	24.4737	30	25.2681	32.119	2708.47	100000	100003
10.45	38.5786	0	3.92518	14.2874	2.1588	36.794	24.652	30	25.4698	32.3747	2813.38	100000	100003
10.5	38.8619	0	3.95545	14.0461	2.15675	36.7443	24.8291	30	25.67	32.6286	2922.35	100000	100003
10.55	39.143	0	3.98553	13.8066	2.15442	36.6949	25.0048	30	25.8688	32.8806	3035.55	100000	100003
10.6	39.422	0	4.01542	13.569	2.15181	36.646	25.1792	30	26.0661	33.1307	3153.12	100000	100003
10.65	39.6988	0	4.0451	13.3334	2.14891	36.5976	25.3522	30	26.2618	33.3788	3275.26	100000	100003
10.7	39.9732	0	4.07458	13.0998	2.14574	36.5497	25.5237	30	26.456	33.6249	3402.12	100000	100003
10.75	40.2453	0	4.10384	12.8683	2.14228	36.5022	25.6937	30	26.6485	33.8689	3533.89	100000	100003
10.8	40.515	0	4.13289	12.6389	2.13855	36.4553	25.8623	30	26.8394	34.1108	3670.77	100000	100003
10.85	40.7822	0	4.16172	12.4117	2.13453	36.4088	26.0293	30	27.0285	34.3505	3812.95	100000	100003
10.9	41.0469	0	4.19031	12.1866	2.13024	36.3629	26.1948	30	27.2159	34.588	3960.64	100000	100003
10.95	41.3091	0	4.21868	11.9638	2.12567	36.3175	26.3586	30	27.4016	34.8233	4114.05	100000	100003
11	41.5686	0	4.24681	11.7433	2.12083	36.2726	26.5208	30	27.5854	35.0562	4273.4	100000	100003
11.05	41.8255	0	4.2747	11.525	2.11572	36.2282	26.6814	30	27.7675	35.2868	4438.93	100000	100003
11.1	42.0797	0	4.30234	11.3091	2.11033	36.1843	26.8402	30	27.9476	35.5151	4610.86	100000	100003
11.15	42.3312	0	4.32973	11.0956	2.10467	36.1411	26.9974	30	28.1259	35.7409	4789.46	100000	100003
11.2	42.5798	0	4.35687	10.8845	2.09875	36.0983	27.1528	30	28.3022	35.9643	4974.97	100000	100003
11.25	42.8257	0	4.38375	10.6758	2.09257	36.0561	27.3065	30	28.4767	36.1852	5167.67	100000	100003
11.3	43.0688	0	4.41038	10.4696	2.08612	36.0145	27.4584	30	28.6491	36.4036	5367.83	100000	100003
11.35	43.3089	0	4.43674	10.2659	2.07942	35.9734	27.6085	30	28.8196	36.6194	5575.74	100000	100003
11.4	43.5462	0	4.46283	10.0646	2.07246	35.9329	27.7568	30	28.988	36.8327	5791.71	100000	100003
11.45	43.7806	0	4.48865	9.86593	2.06525	35.8929	27.9033	30	29.1545	37.0434	6016.04	100000	100003
11.5	44.0119	0	4.51421	9.66977	2.05779	35.8536	28.0479	30	29.3188	37.2516	6249.06	100000	100003
11.55	44.2404	0	4.53949	9.47616	2.05008	35.8147	28.1907	30	29.4812	37.457	6491.11	100000	100003
11.6	44.4658	0	4.56449	9.28513	2.04214	35.7765	28.3316	30	29.6414	37.6599	6742.53	100000	100003
11.65	44.6882	0	4.58921	9.09669	2.03396	35.7389	28.4706	30	29.7996	37.8601	7003.7	100000	100003
11.7	44.9076	0	4.61366	8.91086	2.02554	35.7018	28.6077	30	29.9557	38.0576	7274.97	100000	100003
11.75	45.124	0	4.63782	8.72763	2.0169	35.6653	28.7429	30	30.1097	38.2524	7556.76	100000	100003
11.8	45.3373	0	4.6617	8.54701	2.00803	35.6294	28.8762	30	30.2615	38.4446	7849.46	100000	100003
11.85	45.5475	0	4.6853	8.36902	1.99894	35.594	29.0076	30	30.4113	38.634	8153.49	100000	100003
11.9	45.7547	0	4.70861	8.19366	1.98963	35.5593	29.1371	30	30.5589	38.8207	8469.31	100000	100003
11.95	45.9589	0	4.73164	8.02092	1.98012	35.5251	29.2647	30	30.7044	39.0048	8797.35	100000	100003
12	46.1599	0	4.75438	7.85082	1.97039	35.4915	29.3904	30	30.8478	39.1861	9138.1	100000	100003
12.05	46.3579	0	4.77683	7.68334	1.96047	35.4585	29.5141	30	30.989	39.3647	9492.05	100000	100003
12.1	46.5528	0	4.799	7.51849	1.95035	35.426	29.6359	30	31.1281	39.5405	9859.71	100000	100003
12.15	46.7446	0	4.82088	7.35626	1.94004	35.3941	29.7558	30	31.2651	39.7137	10241.6	100000	100003
12.2	46.9334	0	4.84247	7.19664	1.92954	35.3628	29.8738	30	31.4	39.8841	10638.3	100000	100003
12.25	47.1191	0	4.86377	7.03964	1.91886	35.3321	29.9898	30	31.5327	40.0519	11050.4	100000	100003
12.3	47.3017	0	4.88479	6.88524	1.908	35.3019	30.104	30	31.6633	40.2169	11478.4	100000	100003
12.35	47.4814	0	4.90551	6.73342	1.89697	35.2722	30.2163	30	31.7918	40.3793	11923	100000	100003
12.4	47.658	0	4.92596	6.58419	1.88578	35.2432	30.3266	30	31.9182	40.5389	12384.8	100000	100003
12.45	47.8315	0	4.94612	6.43752	1.87442	35.2147	30.4351	30	32.0425	40.6959	12864.5	100000	100003
12.5	48.0021	0	4.96599	6.29341	1.86291	35.1867	30.5417	30	32.1647	40.8503	13362.8	100000	100003
12.55	48.1697	0	4.98558	6.15183	1.85125	35.1593	30.6465	30	32.2849	41.002	13880.4	100000	100003
12.6	48.3343	0	5.00489	6.01278	1.83945	35.1324	30.7494	30	32.403	41.1511	14418	100000	100003
12.65	48.496	0	5.02392	5.87623	1.82751	35.1061	30.8504	30	32.519	41.2976	14976.5	100000	100003
12.7	48.6548	0	5.04267	5.74216	1.81543	35.0803	30.9497	30	32.633	41.4414	15556.6	100000	100003
12.75	48.8106	0	5.06114	5.61057	1.80322	35.055	31.0471	30	32.745	41.5827	16159.1	100000	100003
12.8	48.9636	0	5.07934	5.48141	1.7909	35.0302	31.1427	30	32.855	41.7215	16785	100000	100003
12.85	49.1137	0	5.09726	5.35469	1.77845	35.006	31.2365	30	32.963	41.8577	17435.2	100000	100003
12.9	49.261	0	5.1149	5.23036	1.7659	34.9823	31.3286	30	33.069	41.9914	18110.5	100000	100003
12.95	49.4055	0	5.13228	5.10842	1.75324	34.959	31.4189	30	33.173	42.1226	18812	100000	100003
13	49.5472	0	5.14939	4.98883	1.74047	34.9363	31.5074	30	33.2752	42.2514	19540.6	100000	100003
13.05	49.6861	0	5.16623	4.87158	1.72762	34.9141	31.5943	30	33.3754	42.3777	20297.5	100000	100003
13.1	49.8223	0	5.18281	4.75663	1.71467	34.8923	31.6794	30	33.4737	42.5016	21083.7	100000	100003
13.15	49.9559	0	5.19912	4.64396	1.70163	34.8711	31.7628	30	33.5701	42.6231	21900.3	100000	100003
13.2	50.0867	0	5.21518	4.53355	1.68852	34.8503	31.8446	30	33.6647	42.7422	22748.6	100000	100003
13.25	50.215	0	5.23098	4.42536	1.67533	34.83	31.9248	30	33.7574	42.8591	23629.7	100000	100003
13.3	50.3406	0	5.24652	4.31938	1.66208	34.8101	32.0033	30	33.8483	42.9735	24545	100000	100003
13.35	50.4636	0	5.26181	4.21557	1.64875	34.7907	32.0802	30	33.9375	43.0858	25495.7	100000	100003
13.4	50.5842	0	5.27685	4.1139	1.63537	34.7717	32.1555	30	34.0248	43.1957	26483.2	100000	100003
13.45	50.7022	0	5.29164	4.01435	1.62194	34.7532	32.2293	30	34.1104	43.3034	27509	100000	100003
13.5	50.8177	0	5.30618	3.91689	1.60846	34.7351	32.3015	30	34.1943	43.409	28574.5	100000	100003
13.55	50.9309	0	5.32049	3.82148	1.59493	34.7175	32.3722	30	34.2765	43.5123	29681.3	100000	100003
13.6	51.0416	0	5.33456	3.7281	1.58136	34.7002	32.4414	30	34.357	43.6136	30831	100000	100003
13.65	51.1499	0	5.34838	3.63673	1.56776	34.6834	32.5091	30	34.4358	43.7127	32025.2	100000	100003
13.7	51.2559	0	5.36198	3.54732	1.55413	34.667	32.5754	30	34.513	43.8097	33265.6	100000	100003
13.75	51.3597	0	5.37534	3.45985	1.54047	34.651	32.6402	30	34.5886	43.9047	34554.1	100000	100003
13.8	51.4611	0	5.38848	3.37428	1.52679	34.6354	32.7036	30	34.6626	43.9977	35892.5	100000	100003
13.85	51.5604	0	5.40139	3.2906	1.51309	34.6201	32.7657	30	34.7351	44.0887	37282.7	100000	100003
13.9	51.6574	0	5.41408	3.20877	1.49938	34.6053	32.8263	30	34.806	44.1778	38726.8	100000	100003
13.95	51.7523	0	5.42655	3.12875	1.48566	34.5908	32.8856	30	34.8754	44.2649	40226.9	100000	100003
14	51.8451	0	5.4388	3.05052	1.47194	34.5767	32.9436	30	34.9433	44.3502	41785	100000	100003
14.05	51.9357	0	5.45084	2.97405	1.45822	34.5629	33.0003	30	35.0097	44.4336	43403.4	100000	100003
14.1	52.0244	0	5.46266	2.89931	1.4445	34.5495	33.0557	30	35.0748	44.5151	45084.6	100000	100003
14.15	52.111	0	5.47428	2.82627	1.43079	34.5365	33.1098	30	35.1384	44.5949	46830.9	100000	100003
14.2	52.1957	0	5.4857	2.75489	1.41709	34.5238	33.1627	30	35.2006	44.6729	48644.8	100000	100003
14.25	52.2784	0	5.49691	2.68515	1.40341	34.5114	33.2144	30	35.2614	44.7491	50529	100000	100003
14.3	52.3592	0	5.50792	2.61701	1.38975	34.4993	33.2649	30	35.3209	44.8237	52486.1	100000	100003
14.35	52.4381	0	5.51874	2.55046	1.3761	34.4876	33.3142	30	35.3791	44.8965	54519.1	100000	100003
14.4	52.5152	0	5.52936	2.48545	1.36249	34.4761	33.3624	30	35.4359	44.9678	56630.8	100000	100003
14.45	52.5905	0	5.5398	2.42197	1.3489	34.465	33.4095	30	35.4915	45.0374	58824.3	100000	100003
14.5	52.664	0	5.55004	2.35997	1.33534	34.4542	33.4554	30	35.5459	45.1054	61102.8	100000	100003
14.55	52.7357	0	5.56011	2.29944	1.32182	34.4436	33.5003	30	35.599	45.1719	63469.5	100000	100003
14.6	52.8058	0	5.56999	2.24034	1.30834	34.4334	33.5441	30	35.6509	45.2369	65927.9	100000	100003
14.65	52.8742	0	5.57969	2.18265	1.2949	34.4234	33.5868	30	35.7017	45.3003	68481.5	100000	100003
14.7	52.941	0	5.58921	2.12633	1.28151	34.4137	33.6286	30	35.7513	45.3623	71134.1	100000	100003
14.75	53.0062	0	5.59856	2.07136	1.26816	34.4043	33.6693	30	35.7997	45.4229	73889.3	100000	100003
14.8	53.0698	0	5.60775	2.01772	1.25486	34.3951	33.709	30	35.8471	45.482	76751.3	100000	100003
14.85	53.1319	0	5.61676	1.96537	1.24161	34.3862	33.7478	30	35.8933	45.5398	79724.2	100000	100003
14.9	53.1924	0	5.62561	1.91429	1.22842	34.3776	33.7857	30	35.9385	45.5962	82812.1	100000	100003
14.95	53.2515	0	5.6343	1.86445	1.21529	34.3692	33.8226	30	35.9827	45.6513	86019.7	100000	100003
15	53.3091	0	5.64282	1.81583	1.20221	34.361	33.8586	30	36.0258	45.7051	89351.6	100000	100003
15.05	53.3654	0	5.65119	1.7684	1.1892	34.3531	33.8938	30	36.0679	45.7576	92812.4	100000	100003
15.1	53.4202	0	5.65941	1.72213	1.17625	34.3454	33.9281	30	36.109	45.8088	96407.4	100000	100003
15.15	53.4737	0	5.66747	1.67701	1.16337	34.3379	33.9615	30	36.1492	45.8589	100001	100000	100003
15.2	53.5259	0	5.67539	1.633	1.15056	34.3306	33.9941	30	36.1884	45.9077	100001	100000	100003
15.25	53.5767	0	5.68316	1.59008	1.13781	34.3235	34.0259	30	36.2267	45.9554	100001	100000	100003
15.3	53.6263	0	5.69079	1.54822	1.12514	34.3167	34.0569	30	36.2641	46.002	100001	100000	100003
15.35	53.6747	0	5.69827	1.50741	1.11254	34.31	34.0871	30	36.3006	46.0474	100001	100000	100003
15.4	53.7219	0	5.70562	1.46762	1.10002	34.3036	34.1166	30	36.3362	46.0918	100001	100000	100003
15.45	53.7678	0	5.71283	1.42883	1.08757	34.2973	34.1453	30	36.371	46.135	100001	100000	100003
15.5	53.8127	0	5.7199	1.39101	1.0752	34.2913	34.1733	30	36.405	46.1772	100001	100000	100003
15.55	53.8563	0	5.72685	1.35415	1.06291	34.2854	34.2006	30	36.4381	46.2184	100001	100000	100003
15.6	53.8989	0	5.73366	1.31822	1.05071	34.2797	34.2272	30	36.4705	46.2586	100001	100000	100003
15.65	53.9404	0	5.74035	1.28321	1.03858	34.2741	34.2532	30	36.502	46.2978	100001	100000	100003
15.7	53.9808	0	5.74691	1.24908	1.02654	34.2688	34.2784	30	36.5329	46.3361	100001	100000	100003
15.75	54.0202	0	5.75335	1.21582	1.01458	34.2636	34.3031	30	36.563	46.3734	100001	100000	100003
15.8	54.0586	0	5.75967	1.18341	1.00271	34.2585	34.3271	30	36.5923	46.4098	100001	100000	100003
15.85	54.096	0	5.76588	1.15183	0.99093	34.2536	34.3504	30	36.621	46.4453	100001	100000	100003
15.9	54.1325	0	5.77196	1.12105	0.979235	34.2489	34.3732	30	36.6489	46.48	100001	100000	100003
15.95	54.168	0	5.77794	1.09107	0.967629	34.2443	34.3954	30	36.6762	46.5137	100001	100000	100003
16	54.2026	0	5.7838	1.06186	0.956112	34.2399	34.417	30	36.7028	46.5467	100001	100000	100003
16.05	54.2363	0	5.78955	1.03341	0.944686	34.2356	34.4381	30	36.7288	46.5788	100001	100000	100003
16.1	54.2691	0	5.79519	1.00568	0.933352	34.2314	34.4586	30	36.7541	46.6102	100001	100000	100003
16.15	54.3011	0	5.80073	0.97868	0.922109	34.2274	34.4786	30	36.7788	46.6407	100001	100000	100003
16.2	54.3322	0	5.80617	0.952376	0.910959	34.2235	34.4981	30	36.803	46.6705	100001	100000	100003
16.25	54.3626	0	5.8115	0.926755	0.899902	34.2197	34.517	30	36.8265	46.6996	100001	100000	100003
16.3	54.3921	0	5.81674	0.901802	0.888939	34.216	34.5355	30	36.8495	46.728	100001	100000	100003
16.35	54.4209	0	5.82187	0.877499	0.87807	34.2125	34.5535	30	36.8719	46.7556	100001	100000	100003
16.4	54.4489	0	5.82691	0.853831	0.867295	34.2091	34.571	30	36.8937	46.7825	100001	100000	100003
16.45	54.4762	0	5.83186	0.830782	0.856616	34.2058	34.588	30	36.915	46.8088	100001	100000	100003
16.5	54.5027	0	5.83671	0.808337	0.846032	34.2026	34.6046	30	36.9358	46.8344	100001	100000	100003
16.55	54.5286	0	5.84148	0.786481	0.835543	34.1995	34.6208	30	36.9561	46.8594	100001	100000	100003
16.6	54.5538	0	5.84615	0.7652	0.82515	34.1965	34.6365	30	36.9759	46.8838	100001	100000	100003
16.65	54.5783	0	5.85074	0.744479	0.814852	34.1936	34.6519	30	36.9952	46.9075	100001	100000	100003
16.7	54.6022	0	5.85524	0.724305	0.804651	34.1908	34.6668	30	37.014	46.9307	100001	100000	100003
16.75	54.6254	0	5.85965	0.704663	0.794546	34.1882	34.6813	30	37.0324	46.9532	100001	100000	100003
16.8	54.6481	0	5.86399	0.68554	0.784538	34.1856	34.6955	30	37.0503	46.9752	100001	100000	100003
16.85	54.6701	0	5.86824	0.666923	0.774625	34.1831	34.7092	30	37.0678	46.9967	100001	100000	100003
16.9	54.6915	0	5.87242	0.6488	0.764809	34.1806	34.7226	30	37.0848	47.0176	100001	100000	100003
16.95	54.7124	0	5.87652	0.631158	0.755089	34.1783	34.7357	30	37.1014	47.038	100001	100000	100003
17	54.7327	0	5.88054	0.613985	0.745465	34.176	34.7484	30	37.1176	47.0579	100001	100000	100003
17.05	54.7525	0	5.88448	0.597268	0.735938	34.1739	34.7607	30	37.1334	47.0772	100001	100000	100003
17.1	54.7717	0	5.88836	0.580997	0.726506	34.1718	34.7728	30	37.1489	47.0961	100001	100000	100003
17.15	54.7905	0	5.89216	0.56516	0.71717	34.1697	34.7845	30	37.1639	47.1145	100001	100000	100003
17.2	54.8087	0	5.89589	0.549745	0.707929	34.1678	34.7959	30	37.1786	47.1325	100001	100000	100003
17.25	54.8264	0	5.89955	0.534743	0.698784	34.1659	34.8069	30	37.1929	47.1499	100001	100000	100003
17.3	54.8437	0	5.90314	0.520142	0.689734	34.1641	34.8177	30	37.2068	47.167	100001	100000	100003
17.35	54.8605	0	5.90667	0.505932	0.680778	34.1624	34.8282	30	37.2204	47.1836	100001	100000	100003
17.4	54.8768	0	5.91013	0.492103	0.671917	34.1607	34.8385	30	37.2337	47.1998	100001	100000	100003
17.45	54.8928	0	5.91353	0.478646	0.66315	34.1591	34.8484	30	37.2466	47.2156	100001	100000	100003
17.5	54.9082	0	5.91686	0.465549	0.654477	34.1575	34.8581	30	37.2593	47.231	100001	100000	100003
17.55	54.9233	0	5.92014	0.452805	0.645898	34.156	34.8675	30	37.2716	47.246	100001	100000	100003
17.6	54.938	0	5.92335	0.440404	0.637411	34.1546	34.8767	30	37.2836	47.2606	100001	100000	100003
17.65	54.9522	0	5.92651	0.428337	0.629017	34.1532	34.8856	30	37.2953	47.2748	100001	100000	100003
17.7	54.9661	0	5.9296	0.416596	0.620715	34.1519	34.8942	30	37.3067	47.2887	100001	100000	100003
17.75	54.9796	0	5.93264	0.405171	0.612505	34.1506	34.9027	30	37.3179	47.3023	100001	100000	100003
17.8	54.9927	0	5.93562	0.394055	0.604386	34.1494	34.9109	30	37.3287	47.3155	100001	100000	100003
17.85	55.0055	0	5.93855	0.383239	0.596358	34.1482	34.9189	30	37.3393	47.3283	100001	100000	100003
17.9	55.018	0	5.94143	0.372715	0.588421	34.147	34.9266	30	37.3497	47.3409	100001	100000	100003
17.95	55.0301	0	5.94425	0.362477	0.580573	34.146	34.9342	30	37.3597	47.3531	100001	100000	100003
18	55.0418	0	5.94702	0.352516	0.572814	34.1449	34.9416	30	37.3696	47.365	100001	100000	100003
18.05	55.0533	0	5.94974	0.342825	0.565144	34.1439	34.9487	30	37.3792	47.3766	100001	100000	100003
18.1	55.0644	0	5.95241	0.333397	0.557562	34.143	34.9557	30	37.3885	47.3879	100001	100000	100003
18.15	55.0752	0	5.95503	0.324225	0.550068	34.1421	34.9625	30	37.3976	47.3989	100001	100000	100003
18.2	55.0858	0	5.9576	0.315302	0.54266	34.1412	34.969	30	37.4065	47.4097	100001	100000	100003
18.25	55.096	0	5.96013	0.306622	0.53534	34.1403	34.9754	30	37.4152	47.4201	100001	100000	100003
18.3	55.106	0	5.96261	0.298177	0.528104	34.1395	34.9817	30	37.4237	47.4304	100001	100000	100003
18.35	55.1157	0	5.96504	0.289963	0.520954	34.1388	34.9877	30	37.4319	47.4403	100001	100000	100003
18.4	55.1251	0	5.96744	0.281972	0.513889	34.138	34.9936	30	37.44	47.45	100001	100000	100003
18.45	55.1343	0	5.96978	0.274199	0.506908	34.1373	34.9994	30	37.4478	47.4595	100001	100000	100003
18.5	55.1432	0	5.97209	0.266638	0.50001	34.1367	35.005	30	37.4555	47.4687	100001	100000	100003
18.55	55.1519	0	5.97435	0.259284	0.493194	34.136	35.0104	30	37.463	47.4777	100001	100000	100003
18.6	55.1604	0	5.97658	0.25213	0.486461	34.1354	35.0157	30	37.4703	47.4864	100001	100000	100003
18.65	55.1686	0	5.97876	0.245172	0.479809	34.1349	35.0208	30	37.4774	47.495	100001	100000	100003
18.7	55.1766	0	5.9809	0.238403	0.473237	34.1343	35.0258	30	37.4843	47.5033	100001	100000	100003
18.75	55.1844	0	5.98301	0.23182	0.466746	34.1338	35.0306	30	37.4911	47.5114	100001	100000	100003
18.8	55.1919	0	5.98507	0.225417	0.460334	34.1333	35.0354	30	37.4977	47.5193	100001	100000	100003
18.85	55.1993	0	5.9871	0.219189	0.454	34.1328	35.04	30	37.5041	47.527	100001	100000	100003
18.9	55.2064	0	5.9891	0.213132	0.447745	34.1324	35.0444	30	37.5104	47.5345	100001	100000	100003
18.95	55.2134	0	5.99105	0.20724	0.441567	34.132	35.0488	30	37.5165	47.5418	100001	100000	100003
19	55.2201	0	5.99298	0.20151	0.435466	34.1316	35.053	30	37.5225	47.549	100001	100000	100003
19.05	55.2267	0	5.99486	0.195937	0.42944	34.1312	35.0571	30	37.5284	47.5559	100001	100000	100003
19.1	55.2331	0	5.99672	0.190517	0.42349	34.1308	35.0611	30	37.534	47.5627	100001	100000	100003
19.15	55.2393	0	5.99854	0.185246	0.417614	34.1305	35.065	30	37.5396	47.5693	100001	100000	100003
19.2	55.2454	0	6.00033	0.180119	0.411812	34.1302	35.0688	30	37.545	47.5758	100001	100000	100003
19.25	55.2513	0	6.00209	0.175134	0.406084	34.1299	35.0725	30	37.5503	47.5821	100001	100000	100003
19.3	55.257	0	6.00381	0.170285	0.400428	34.1296	35.076	30	37.5555	47.5882	100001	100000	100003
19.35	55.2625	0	6.00551	0.165569	0.394843	34.1293	35.0795	30	37.5605	47.5942	100001	100000	100003
19.4	55.2679	0	6.00717	0.160984	0.38933	34.1291	35.0829	30	37.5654	47.6	100001	100000	100003
19.45	55.2732	0	6.00881	0.156524	0.383887	34.1289	35.0862	30	37.5702	47.6057	100001	100000	100003
19.5	55.2783	0	6.01041	0.152187	0.378513	34.1287	35.0894	30	37.5749	47.6112	100001	100000	100003
19.55	55.2833	0	6.01199	0.147969	0.373209	34.1285	35.0925	30	37.5794	47.6166	100001	100000	100003
19.6	55.2881	0	6.01354	0.143868	0.367973	34.1283	35.0955	30	37.5839	47.6219	100001	100000	100003
19.65	55.2928	0	6.01507	0.139879	0.362804	34.1281	35.0985	30	37.5882	47.627	100001	100000	100003
19.7	55.2974	0	6.01656	0.136001	0.357703	34.128	35.1013	30	37.5925	47.632	100001	100000	100003
19.75	55.3019	0	6.01803	0.132229	0.352667	34.1278	35.1041	30	37.5966	47.6369	100001	100000	100003
19.8	55.3062	0	6.01948	0.128562	0.347697	34.1277	35.1068	30	37.6007	47.6417	100001	100000	100003
19.85	55.3104	0	6.02089	0.124995	0.342792	34.1276	35.1094	30	37.6046	47.6463	100001	100000	100003
19.9	55.3145	0	6.02229	0.121527	0.337951	34.1275	35.112	30	37.6084	47.6509	100001	100000	100003
19.95	55.3185	0	6.02366	0.118155	0.333173	34.1274	35.1145	30	37.6122	47.6553	100001	100000	100003
20	55.3223	0	6.025	0.114875	0.328458	34.1273	35.1169	30	37.6159	47.6596	100001	100000	100003
20.05	55.3261	0	6.02633	0.111686	0.323805	34.1272	35.1192	30	37.6194	47.6638	100001	100000	100003
20.1	55.3297	0	6.02762	0.108586	0.319214	34.1272	35.1215	30	37.6229	47.6679	100001	100000	100003
20.15	55.3333	0	6.0289	0.105571	0.314683	34.1271	35.1237	30	37.6263	47.6719	100001	100000	100003
20.2	55.3368	0	6.03016	0.102639	0.310212	34.1271	35.1259	30	37.6297	47.6757	100001	100000	100003
20.25	55.3401	0	6.03139	0.0997882	0.305801	34.1271	35.128	30	37.6329	47.6795	100001	100000	100003
20.3	55.3434	0	6.0326	0.0970163	0.301448	34.127	35.13	30	37.6361	47.6832	100001	100000	100003
20.35	55.3466	0	6.03379	0.094321	0.297153	34.127	35.132	30	37.6392	47.6869	100001	100000	100003
20.4	55.3496	0	6.03496	0.0917004	0.292916	34.127	35.134	30	37.6422	47.6904	100001	100000	100003
20.45	55.3527	0	6.03611	0.0891522	0.288736	34.127	35.1358	30	37.6452	47.6938	100001	100000	100003
20.5	55.3556	0	6.03724	0.0866745	0.284611	34.127	35.1377	30	37.648	47.6972	100001	100000	100003
20.55	55.3584	0	6.03835	0.0842654	0.280542	34.127	35.1394	30	37.6509	47.7004	100001	100000	100003
20.6	55.3612	0	6.03944	0.0819229	0.276528	34.127	35.1412	30	37.6536	47.7036	100001	100000	100003
20.65	55.3639	0	6.04051	0.0796454	0.272568	34.1271	35.1428	30	37.6563	47.7067	100001	100000	100003
20.7	55.3665	0	6.04156	0.0774309	0.268661	34.1271	35.1445	30	37.6589	47.7098	100001	100000	100003
20.75	55.369	0	6.0426	0.0752778	0.264808	34.1271	35.1461	30	37.6615	47.7127	100001	100000	100003
20.8	55.3715	0	6.04361	0.0731843	0.261006	34.1272	35.1476	30	37.664	47.7156	100001	100000	100003
20.85	55.3739	0	6.04461	0.0711488	0.257257	34.1272	35.1491	30	37.6664	47.7185	100001	100000	100003
20.9	55.3762	0	6.0456	0.0691697	0.253558	34.1273	35.1506	30	37.6688	47.7212	100001	100000	100003
20.95	55.3785	0	6.04656	0.0672455	0.24991	34.1274	35.152	30	37.6711	47.7239	100001	100000	100003
21	55.3807	0	6.04751	0.0653746	0.246312	34.1274	35.1533	30	37.6734	47.7265	100001	100000	100003
21.05	55.3828	0	6.04845	0.0635557	0.242762	34.1275	35.1547	30	37.6756	47.7291	100001	100000	100003
21.1	55.3849	0	6.04936	0.0617872	0.239262	34.1276	35.156	30	37.6778	47.7316	100001	100000	100003
21.15	55.3869	0	6.05027	0.0600677	0.235809	34.1276	35.1573	30	37.6799	47.734	100001	100000	100003
21.2	55.3889	0	6.05115	0.0583959	0.232404	34.1277	35.1585	30	37.682	47.7364	100001	100000	100003
21.25	55.3908	0	6.05202	0.0567705	0.229046	34.1278	35.1597	30	37.684	47.7387	100001	100000	100003
21.3	55.3927	0	6.05288	0.0551902	0.225734	34.1279	35.1608	30	37.6859	47.7409	100001	100000	100003
21.35	55.3945	0	6.05372	0.0536539	0.222468	34.128	35.162	30	37.6879	47.7431	100001	100000	100003
21.4	55.3962	0	6.05455	0.0521601	0.219247	34.1281	35.1631	30	37.6898	47.7453	100001	100000	100003
21.45	55.3979	0	6.05536	0.0507078	0.21607	34.1282	35.1641	30	37.6916	47.7474	100001	100000	100003
21.5	55.3996	0	6.05616	0.0492959	0.212938	34.1283	35.1652	30	37.6934	47.7494	100001	100000	100003
21.55	55.4012	0	6.05695	0.0479231	0.209849	34.1284	35.1662	30	37.6952	47.7514	100001	100000	100003
21.6	55.4028	0	6.05772	0.0465885	0.206803	34.1285	35.1672	30	37.6969	47.7534	100001	100000	100003
21.65	55.4043	0	6.05848	0.045291	0.203799	34.1286	35.1681	30	37.6985	47.7553	100001	100000	100003
21.7	55.4058	0	6.05923	0.0440295	0.200837	34.1287	35.1691	30	37.7002	47.7572	100001	100000	100003
21.75	55.4073	0	6.05997	0.042803	0.197917	34.1288	35.17	30	37.7018	47.759	100001	100000	100003
21.8	55.4087	0	6.06069	0.0416107	0.195037	34.1289	35.1708	30	37.7034	47.7608	100001	100000	100003
21.85	55.41	0	6.0614	0.0404514	0.192197	34.129	35.1717	30	37.7049	47.7625	100001	100000	100003
21.9	55.4114	0	6.0621	0.0393244	0.189398	34.1291	35.1725	30	37.7064	47.7642	100001	100000	100003
21.95	55.4126	0	6.06279	0.0382288	0.186637	34.1292	35.1733	30	37.7078	47.7658	100001	100000	100003
22	55.4139	0	6.06346	0.0371636	0.183916	34.1294	35.1741	30	37.7093	47.7674	100001	100000	100003
22.05	55.4151	0	6.06413	0.036128	0.181232	34.1295	35.1749	30	37.7107	47.769	100001	100000	100003
22.1	55.4163	0	6.06478	0.0351212	0.178587	34.1296	35.1756	30	37.712	47.7705	100001	100000	100003
22.15	55.4175	0	6.06542	0.0341424	0.175978	34.1297	35.1763	30	37.7134	47.772	100001	100000	100003
22.2	55.4186	0	6.06605	0.0331908	0.173407	34.1298	35.177	30	37.7147	47.7735	100001	100000	100003
22.25	55.4197	0	6.06667	0.0322657	0.170871	34.13	35.1777	30	37.7159	47.7749	100001	100000	100003
22.3	55.4207	0	6.06728	0.0313664	0.168372	34.1301	35.1784	30	37.7172	47.7763	100001	100000	100003
22.35	55.4218	0	6.06788	0.030492	0.165907	34.1302	35.179	30	37.7184	47.7777	100001	100000	100003
22.4	55.4228	0	6.06847	0.029642	0.163478	34.1303	35.1796	30	37.7196	47.779	100001	100000	100003
22.45	55.4237	0	6.06905	0.0288156	0.161083	34.1305	35.1803	30	37.7208	47.7803	100001	100000	100003
22.5	55.4247	0	6.06963	0.0280123	0.158722	34.1306	35.1808	30	37.7219	47.7816	100001	100000	100003
22.55	55.4256	0	6.07019	0.0272313	0.156395	34.1307	35.1814	30	37.723	47.7828	100001	100000	100003
22.6	55.4265	0	6.07074	0.026472	0.154101	34.1308	35.182	30	37.7241	47.7841	100001	100000	100003
22.65	55.4274	0	6.07128	0.0257339	0.151839	34.131	35.1825	30	37.7252	47.7852	100001	100000	100003
22.7	55.4282	0	6.07182	0.0250163	0.14961	34.1311	35.1831	30	37.7262	47.7864	100001	100000	100003
22.75	55.429	0	6.07234	0.0243187	0.147412	34.1312	35.1836	30	37.7272	47.7875	100001	100000	100003
22.8	55.4298	0	6.07286	0.0236405	0.145246	34.1313	35.1841	30	37.7282	47.7886	100001	100000	100003
22.85	55.4306	0	6.07337	0.0229812	0.14311	34.1315	35.1845	30	37.7292	47.7897	100001	100000	100003
22.9	55.4314	0	6.07387	0.0223403	0.141005	34.1316	35.185	30	37.7301	47.7908	100001	100000	100003
22.95	55.4321	0	6.07436	0.0217172	0.138931	34.1317	35.1855	30	37.7311	47.7918	100001	100000	100003
23	55.4328	0	6.07484	0.0211115	0.136886	34.1318	35.1859	30	37.732	47.7928	100001	100000	100003
23.05	55.4335	0	6.07532	0.0205226	0.13487	34.132	35.1864	30	37.7329	47.7938	100001	100000	100003
23.1	55.4342	0	6.07579	0.0199501	0.132883	34.1321	35.1868	30	37.7337	47.7947	100001	100000	100003
23.15	55.4348	0	6.07625	0.0193936	0.130925	34.1322	35.1872	30	37.7346	47.7957	100001	100000	100003
23.2	55.4355	0	6.0767	0.0188526	0.128994	34.1324	35.1876	30	37.7354	47.7966	100001	100000	100003
23.25	55.4361	0	6.07714	0.0183267	0.127092	34.1325	35.188	30	37.7363	47.7975	100001	100000	100003
23.3	55.4367	0	6.07758	0.0178154	0.125217	34.1326	35.1883	30	37.7371	47.7984	100001	100000	100003
23.35	55.4373	0	6.07801	0.0173184	0.123368	34.1327	35.1887	30	37.7378	47.7992	100001	100000	100003
23.4	55.4378	0	6.07844	0.0168352	0.121547	34.1328	35.1891	30	37.7386	47.8001	100001	100000	100003
23.45	55.4384	0	6.07885	0.0163655	0.119752	34.133	35.1894	30	37.7393	47.8009	100001	100000	100003
23.5	55.4389	0	6.07926	0.0159088	0.117982	34.1331	35.1898	30	37.7401	47.8017	100001	100000	100003
23.55	55.4394	0	6.07967	0.0154649	0.116238	34.1332	35.1901	30	37.7408	47.8025	100001	100000	100003
23.6	55.4399	0	6.08006	0.0150334	0.11452	34.1333	35.1904	30	37.7415	47.8032	100001	100000	100003
23.65	55.4404	0	6.08045	0.0146139	0.112826	34.1335	35.1907	30	37.7422	47.804	100001	100000	100003
23.7	55.4409	0	6.08084	0.0142061	0.111157	34.1336	35.191	30	37.7429	47.8047	100001	100000	100003
23.75	55.4414	0	6.08122	0.0138096	0.109512	34.1337	35.1913	30	37.7435	47.8054	100001	100000	100003
23.8	55.4418	0	6.08159	0.0134243	0.10789	34.1338	35.1916	30	37.7442	47.8061	100001	100000	100003
23.85	55.4423	0	6.08195	0.0130496	0.106292	34.1339	35.1919	30	37.7448	47.8068	100001	100000	100003
23.9	55.4427	0	6.08231	0.0126854	0.104718	34.1341	35.1921	30	37.7454	47.8075	100001	100000	100003
23.95	55.4431	0	6.08267	0.0123314	0.103166	34.1342	35.1924	30	37.746	47.8081	100001	100000	100003
24	55.4435	0	6.08302	0.0119872	0.101637	34.1343	35.1926	30	37.7466	47.8087	100001	100000	100003
24.05	55.4439	0	6.08336	0.0116526	0.10013	34.1344	35.1929	30	37.7472	47.8094	100001	100000	100003
24.1	55.4443	0	6.0837	0.0113274	0.0986446	34.1345	35.1931	30	37.7477	47.81	100001	100000	100003
24.15	55.4447	0	6.08403	0.0110112	0.0971811	34.1346	35.1934	30	37.7483	47.8106	100001	100000	100003
24.2	55.445	0	6.08435	0.0107038	0.0957389	34.1347	35.1936	30	37.7488	47.8112	100001	100000	100003
24.25	55.4454	0	6.08468	0.0104051	0.0943177	34.1349	35.1938	30	37.7494	47.8117	100001	100000	100003
24.3	55.4457	0	6.08499	0.0101146	0.0929171	34.135	35.194	30	37.7499	47.8123	100001	100000	100003
24.35	55.4461	0	6.0853	0.00983225	0.0915371	34.1351	35.1942	30	37.7504	47.8128	100001	100000	100003
24.4	55.4464	0	6.08561	0.00955777	0.0901771	34.1352	35.1944	30	37.7509	47.8134	100001	100000	100003
24.45	55.4467	0	6.08591	0.00929096	0.088837	34.1353	35.1946	30	37.7514	47.8139	100001	100000	100003
24.5	55.447	0	6.0862	0.00903158	0.0875164	34.1354	35.1948	30	37.7519	47.8144	100001	100000	100003
24.55	55.4473	0	6.0865	0.00877944	0.0862152	34.1355	35.195	30	37.7523	47.8149	100001	100000	100003
24.6	55.4476	0	6.08678	0.00853433	0.0849329	34.1356	35.1952	30	37.7528	47.8154	100001	100000	100003
24.65	55.4479	0	6.08706	0.00829606	0.0836695	34.1357	35.1953	30	37.7533	47.8159	100001	100000	100003
24.7	55.4481	0	6.08734	0.00806444	0.0824245	34.1358	35.1955	30	37.7537	47.8163	100001	100000	100003
24.75	55.4484	0	6.08762	0.00783928	0.0811977	34.1359	35.1957	30	37.7541	47.8168	100001	100000	100003
24.8	55.4487	0	6.08788	0.00762041	0.0799889	34.136	35.1958	30	37.7546	47.8172	100001	100000	100003
24.85	55.4489	0	6.08815	0.00740764	0.0787978	34.1361	35.196	30	37.755	47.8177	100001	100000	100003
24.9	55.4492	0	6.08841	0.0072008	0.0776242	34.1362	35.1962	30	37.7554	47.8181	100001	100000	100003
24.95	55.4494	0	6.08866	0.00699974	0.0764678	34.1363	35.1963	30	37.7558	47.8185	100001	100000	100003
25	55.4496	0	6.08892	0.00680429	0.0753283	34.1364	35.1964	30	37.7562	47.8189	100001	100000	100003
25.05	55.4499	0	6.08916	0.00661429	0.0742056	34.1365	35.1966	30	37.7565	47.8193	100001	100000	100003
25.1	55.4501	0	6.08941	0.0064296	0.0730994	34.1366	35.1967	30	37.7569	47.8197	100001	100000	100003
25.15	55.4503	0	6.08965	0.00625006	0.0720094	34.1367	35.1969	30	37.7573	47.8201	100001	100000	100003
25.2	55.4505	0	6.08989	0.00607553	0.0709355	34.1368	35.197	30	37.7576	47.8205	100001	100000	100003
25.25	55.4507	0	6.09012	0.00590586	0.0698773	34.1369	35.1971	30	37.758	47.8209	100001	100000	100003
25.3	55.4509	0	6.09035	0.00574094	0.0688347	34.137	35.1972	30	37.7583	47.8212	100001	100000	100003
25.35	55.4511	0	6.09057	0.00558062	0.0678075	34.1371	35.1973	30	37.7587	47.8216	100001	100000	100003
25.4	55.4513	0	6.09079	0.00542477	0.0667953	34.1372	35.1975	30	37.759	47.8219	100001	100000	100003
25.45	55.4514	0	6.09101	0.00527328	0.0657981	34.1373	35.1976	30	37.7593	47.8223	100001	100000	100003
25.5	55.4516	0	6.09123	0.00512601	0.0648156	34.1374	35.1977	30	37.7597	47.8226	100001	100000	100003
25.55	55.4518	0	6.09144	0.00498285	0.0638476	34.1374	35.1978	30	37.76	47.8229	100001	100000	100003
25.6	55.4519	0	6.09165	0.00484368	0.0628938	34.1375	35.1979	30	37.7603	47.8232	100001	100000	100003
25.65	55.4521	0	6.09185	0.00470841	0.0619541	34.1376	35.198	30	37.7606	47.8235	100001	100000	100003
25.7	55.4523	0	6.09205	0.00457691	0.0610283	34.1377	35.1981	30	37.7609	47.8239	100001	100000	100003
25.75	55.4524	0	6.09225	0.00444908	0.0601161	34.1378	35.1982	30	37.7612	47.8242	100001	100000	100003
25.8	55.4525	0	6.09244	0.00432482	0.0592174	34.1379	35.1983	30	37.7614	47.8244	100001	100000	100003
25.85	55.4527	0	6.09264	0.00420403	0.058332	34.138	35.1984	30	37.7617	47.8247	100001	100000	100003
25.9	55.4528	0	6.09283	0.0040866	0.0574597	34.138	35.1984	30	37.762	47.825	100001	100000	100003
25.95	55.453	0	6.09301	0.00397246	0.0566003	34.1381	35.1985	30	37.7623	47.8253	100001	100000	100003
26	55.4531	0	6.09319	0.00386151	0.0557535	34.1382	35.1986	30	37.7625	47.8256	100001	100000	100003
26.05	55.4532	0	6.09337	0.00375365	0.0549194	34.1383	35.1987	30	37.7628	47.8258	100001	100000	100003
26.1	55.4533	0	6.09355	0.00364881	0.0540975	34.1384	35.1988	30	37.763	47.8261	100001	100000	100003
26.15	55.4535	0	6.09373	0.00354689	0.0532878	34.1384	35.1988	30	37.7633	47.8263	100001	100000	100003
26.2	55.4536	0	6.0939	0.00344781	0.0524901	34.1385	35.1989	30	37.7635	47.8266	100001	100000	100003
26.25	55.4537	0	6.09407	0.0033515	0.0517042	34.1386	35.199	30	37.7637	47.8268	100001	100000	100003
26.3	55.4538	0	6.09423	0.00325789	0.05093	34.1387	35.1991	30	37.764	47.8271	100001	100000	100003
26.35	55.4539	0	6.0944	0.00316688	0.0501672	34.1387	35.1991	30	37.7642	47.8273	100001	100000	100003
26.4	55.454	0	6.09456	0.00307842	0.0494158	34.1388	35.1992	30	37.7644	47.8275	100001	100000	100003
26.45	55.4541	0	6.09472	0.00299243	0.0486755	34.1389	35.1992	30	37.7647	47.8277	100001	100000	100003
26.5	55.4542	0	6.09487	0.00290884	0.0479462	34.1389	35.1993	30	37.7649	47.828	100001	100000	100003
26.55	55.4543	0	6.09503	0.00282758	0.0472277	34.139	35.1994	30	37.7651	47.8282	100001	100000	100003
26.6	55.4544	0	6.09518	0.00274859	0.0465198	34.1391	35.1994	30	37.7653	47.8284	100001	100000	100003
26.65	55.4545	0	6.09533	0.00267181	0.0458225	34.1392	35.1995	30	37.7655	47.8286	100001	100000	100003
26.7	55.4546	0	6.09547	0.00259717	0.0451355	34.1392	35.1995	30	37.7657	47.8288	100001	100000	100003
26.75	55.4547	0	6.09562	0.00252462	0.0444587	34.1393	35.1996	30	37.7659	47.829	100001	100000	100003
26.8	55.4547	0	6.09576	0.00245409	0.043792	34.1394	35.1996	30	37.7661	47.8292	100001	100000	100003
26.85	55.4548	0	6.0959	0.00238553	0.0431352	34.1394	35.1997	30	37.7663	47.8294	100001	100000	100003
26.9	55.4549	0	6.09604	0.00231889	0.0424882	34.1395	35.1997	30	37.7664	47.8296	100001	100000	100003
26.95	55.455	0	6.09617	0.00225411	0.0418508	34.1396	35.1998	30	37.7666	47.8297	100001	100000	100003
27	55.4551	0	6.09631	0.00219113	0.0412228	34.1396	35.1998	30	37.7668	47.8299	100001	100000	100003
27.05	55.4551	0	6.09644	0.00212992	0.0406043	34.1397	35.1999	30	37.767	47.8301	100001	100000	100003
27.1	55.4552	0	6.09657	0.00207041	0.0399949	34.1397	35.1999	30	37.7672	47.8303	100001	100000	100003
27.15	55.4553	0	6.09669	0.00201257	0.0393946	34.1398	35.2	30	37.7673	47.8304	100001	100000	100003
27.2	55.4553	0	6.09682	0.00195635	0.0388032	34.1399	35.2	30	37.7675	47.8306	100001	100000	100003
27.25	55.4554	0	6.09694	0.00190169	0.0382206	34.1399	35.2	30	37.7676	47.8308	100001	100000	100003
27.3	55.4555	0	6.09706	0.00184856	0.0376467	34.14	35.2001	30	37.7678	47.8309	100001	100000	100003
27.35	55.4555	0	6.09718	0.00179691	0.0370814	34.14	35.2001	30	37.768	47.8311	100001	100000	100003
27.4	55.4556	0	6.0973	0.00174671	0.0365245	34.1401	35.2002	30	37.7681	47.8312	100001	100000	100003
27.45	55.4556	0	6.09742	0.00169791	0.0359758	34.1401	35.2002	30	37.7683	47.8314	100001	100000	100003
27.5	55.4557	0	6.09753	0.00165047	0.0354354	34.1402	35.2002	30	37.7684	47.8315	100001	100000	100003
27.55	55.4557	0	6.09764	0.00160436	0.034903	34.1403	35.2003	30	37.7686	47.8317	100001	100000	100003
27.6	55.4558	0	6.09775	0.00155953	0.0343786	34.1403	35.2003	30	37.7687	47.8318	100001	100000	100003
27.65	55.4559	0	6.09786	0.00151596	0.033862	34.1404	35.2003	30	37.7688	47.832	100001	100000	100003
27.7	55.4559	0	6.09797	0.0014736	0.0333531	34.1404	35.2004	30	37.769	47.8321	100001	100000	100003
27.75	55.4559	0	6.09807	0.00143243	0.0328518	34.1405	35.2004	30	37.7691	47.8322	100001	100000	100003
27.8	55.456	0	6.09818	0.00139241	0.032358	34.1405	35.2004	30	37.7692	47.8324	100001	100000	100003
27.85	55.456	0	6.09828	0.0013535	0.0318715	34.1406	35.2005	30	37.7694	47.8325	100001	100000	100003
27.9	55.4561	0	6.09838	0.00131569	0.0313923	34.1406	35.2005	30	37.7695	47.8326	100001	100000	100003
27.95	55.4561	0	6.09848	0.00127892	0.0309203	34.1407	35.2005	30	37.7696	47.8327	100001	100000	100003
28	55.4562	0	6.09858	0.00124319	0.0304553	34.1407	35.2005	30	37.7697	47.8329	100001	100000	100003
28.05	55.4562	0	6.09867	0.00120845	0.0299973	34.1408	35.2006	30	37.7699	47.833	100001	100000	100003
28.1	55.4563	0	6.09877	0.00117469	0.0295461	34.1408	35.2006	30	37.77	47.8331	100001	100000	100003
28.15	55.4563	0	6.09886	0.00114186	0.0291017	34.1409	35.2006	30	37.7701	47.8332	100001	100000	100003
28.2	55.4563	0	6.09895	0.00110996	0.0286639	34.1409	35.2006	30	37.7702	47.8333	100001	100000	100003
28.25	55.4564	0	6.09904	0.00107895	0.0282326	34.141	35.2007	30	37.7703	47.8334	100001	100000	100003
28.3	55.4564	0	6.09913	0.0010488	0.0278078	34.141	35.2007	30	37.7704	47.8335	100001	100000	100003
28.35	55.4564	0	6.09922	0.00101949	0.0273894	34.141	35.2007	30	37.7705	47.8336	100001	100000	100003
28.4	55.4565	0	6.0993	0.000991004	0.0269772	34.1411	35.2007	30	37.7706	47.8338	100001	100000	100003
28.45	55.4565	0	6.09939	0.000963313	0.0265712	34.1411	35.2007	30	37.7708	47.8339	100001	100000	100003
28.5	55.4565	0	6.09947	0.000936396	0.0261713	34.1412	35.2008	30	37.7709	47.834	100001	100000	100003
28.55	55.4566	0	6.09955	0.000910231	0.0257773	34.1412	35.2008	30	37.771	47.8341	100001	100000	100003
28.6	55.4566	0	6.09963	0.000884796	0.0253893	34.1413	35.2008	30	37.7711	47.8342	100001	100000	100003
28.65	55.4566	0	6.09971	0.000860072	0.025007	34.1413	35.2008	30	37.7712	47.8342	100001	100000	100003
28.7	55.4566	0	6.09979	0.000836039	0.0246305	34.1413	35.2008	30	37.7712	47.8343	100001	100000	100003
28.75	55.4567	0	6.09987	0.000812677	0.0242596	34.1414	35.2008	30	37.7713	47.8344	100001	100000	100003
28.8	55.4567	0	6.09995	0.000789969	0.0238943	34.1414	35.2009	30	37.7714	47.8345	100001	100000	100003
28.85	55.4567	0	6.10002	0.000767894	0.0235344	34.1415	35.2009	30	37.7715	47.8346	100001	100000	100003
28.9	55.4568	0	6.10009	0.000746437	0.02318	34.1415	35.2009	30	37.7716	47.8347	100001	100000	100003
28.95	55.4568	0	6.10017	0.000725578	0.0228308	34.1415	35.2009	30	37.7717	47.8348	100001	100000	100003
29	55.4568	0	6.10024	0.000705302	0.0224869	34.1416	35.2009	30	37.7718	47.8349	100001	100000	100003
29.05	55.4568	0	6.10031	0.000685593	0.0221482	34.1416	35.2009	30	37.7719	47.8349	100001	100000	100003
29.1	55.4568	0	6.10038	0.000666435	0.0218145	34.1416	35.201	30	37.772	47.835	100001	100000	100003
29.15	55.4569	0	6.10044	0.000647812	0.0214858	34.1417	35.201	30	37.772	47.8351	100001	100000	100003
29.2	55.4569	0	6.10051	0.00062971	0.0211621	34.1417	35.201	30	37.7721	47.8352	100001	100000	100003
29.25	55.4569	0	6.10058	0.000612113	0.0208432	34.1418	35.201	30	37.7722	47.8353	100001	100000	100003
29.3	55.4569	0	6.10064	0.000595007	0.0205291	34.1418	35.201	30	37.7723	47.8353	100001	100000	100003
29.35	55.457	0	6.10071	0.00057838	0.0202197	34.1418	35.201	30	37.7723	47.8354	100001	100000	100003
29.4	55.457	0	6.10077	0.000562217	0.0199149	34.1419	35.201	30	37.7724	47.8355	100001	100000	100003
29.45	55.457	0	6.10083	0.000546506	0.0196147	34.1419	35.201	30	37.7725	47.8355	100001	100000	100003
29.5	55.457	0	6.10089	0.000531234	0.0193191	34.1419	35.2011	30	37.7726	47.8356	100001	100000	100003
29.55	55.457	0	6.10095	0.000516389	0.0190278	34.142	35.2011	30	37.7726	47.8357	100001	100000	100003
29.6	55.457	0	6.10101	0.000501958	0.018741	34.142	35.2011	30	37.7727	47.8357	100001	100000	100003
29.65	55.4571	0	6.10107	0.000487931	0.0184584	34.142	35.2011	30	37.7728	47.8358	100001	100000	100003
29.7	55.4571	0	6.10113	0.000474295	0.0181801	34.142	35.2011	30	37.7728	47.8359	100001	100000	100003
29.75	55.4571	0	6.10118	0.000461041	0.017906	34.1421	35.2011	30	37.7729	47.8359	100001	100000	100003
29.8	55.4571	0	6.10124	0.000448157	0.017636	34.1421	35.2011	30	37.773	47.836	100001	100000	100003
29.85	55.4571	0	6.10129	0.000435633	0.01737	34.1421	35.2011	30	37.773	47.8361	100001	100000	100003
29.9	55.4571	0	6.10135	0.000423459	0.0171081	34.1422	35.2011	30	37.7731	47.8361	100001	100000	100003
29.95	55.4571	0	6.1014	0.000411625	0.01685	34.1422	35.2011	30	37.7732	47.8362	100001	100000	100003
30	55.4572	0	6.10145	0.000400122	0.0165959	34.1422	35.2012	30	37.7732	47.8362	100001	100000	100003
30.05	55.4572	0	6.1015	0.00038894	0.0163455	34.1422	35.2012	30	37.7733	47.8363	100001	100000	100003
30.1	55.4572	0	6.10155	0.000378071	0.016099	34.1423	35.2012	30	37.7733	47.8364	100001	100000	100003
30.15	55.4572	0	6.1016	0.000367505	0.0158561	34.1423	35.2012	30	37.7734	47.8364	100001	100000	100003
30.2	55.4572	0	6.10165	0.000357234	0.0156169	34.1423	35.2012	30	37.7734	47.8365	100001	100000	100003
30.25	55.4572	0	6.1017	0.000347251	0.0153813	34.1424	35.2012	30	37.7735	47.8365	100001	100000	100003
30.3	55.4572	0	6.10175	0.000337546	0.0151492	34.1424	35.2012	30	37.7736	47.8366	100001	100000	100003
30.35	55.4572	0	6.1018	0.000328113	0.0149206	34.1424	35.2012	30	37.7736	47.8366	100001	100000	100003
30.4	55.4573	0	6.10184	0.000318944	0.0146955	34.1424	35.2012	30	37.7737	47.8367	100001	100000	100003
30.45	55.4573	0	6.10189	0.00031003	0.0144737	34.1425	35.2012	30	37.7737	47.8367	100001	100000	100003
30.5	55.4573	0	6.10193	0.000301366	0.0142553	34.1425	35.2012	30	37.7738	47.8368	100001	100000	100003
30.55	55.4573	0	6.10198	0.000292944	0.0140402	34.1425	35.2012	30	37.7738	47.8368	100001	100000	100003
30.6	55.4573	0	6.10202	0.000284757	0.0138283	34.1425	35.2012	30	37.7739	47.8369	100001	100000	100003
30.65	55.4573	0	6.10206	0.000276799	0.0136196	34.1426	35.2012	30	37.7739	47.8369	100001	100000	100003
30.7	55.4573	0	6.10211	0.000269063	0.013414	34.1426	35.2012	30	37.774	47.837	100001	100000	100003
30.75	55.4573	0	6.10215	0.000261544	0.0132115	34.1426	35.2013	30	37.774	47.837	100001	100000	100003
30.8	55.4573	0	6.10219	0.000254234	0.0130121	34.1426	35.2013	30	37.7741	47.837	100001	100000	100003
30.85	55.4573	0	6.10223	0.000247129	0.0128157	34.1426	35.2013	30	37.7741	47.8371	100001	100000	100003
30.9	55.4574	0	6.10227	0.000240222	0.0126222	34.1427	35.2013	30	37.7741	47.8371	100001	100000	100003
30.95	55.4574	0	6.10231	0.000233509	0.0124316	34.1427	35.2013	30	37.7742	47.8372	100001	100000	100003
31	55.4574	0	6.10234	0.000226983	0.0122439	34.1427	35.2013	30	37.7742	47.8372	100001	100000	100003
31.05	55.4574	0	6.10238	0.000220639	0.0120591	34.1427	35.2013	30	37.7743	47.8372	100001	100000	100003
31.1	55.4574	0	6.10242	0.000214473	0.011877	34.1427	35.2013	30	37.7743	47.8373	100001	100000	100003
31.15	55.4574	0	6.10246	0.000208479	0.0116976	34.1428	35.2013	30	37.7744	47.8373	100001	100000	100003
31.2	55.4574	0	6.10249	0.000202652	0.011521	34.1428	35.2013	30	37.7744	47.8374	100001	100000	100003
31.25	55.4574	0	6.10253	0.000196989	0.011347	34.1428	35.2013	30	37.7744	47.8374	100001	100000	100003
31.3	55.4574	0	6.10256	0.000191483	0.0111757	34.1428	35.2013	30	37.7745	47.8374	100001	100000	100003
31.35	55.4574	0	6.1026	0.000186132	0.0110069	34.1428	35.2013	30	37.7745	47.8375	100001	100000	100003
31.4	55.4574	0	6.10263	0.00018093	0.0108406	34.1429	35.2013	30	37.7745	47.8375	100001	100000	100003
31.45	55.4574	0	6.10266	0.000175873	0.0106769	34.1429	35.2013	30	37.7746	47.8375	100001	100000	100003
31.5	55.4574	0	6.1027	0.000170958	0.0105157	34.1429	35.2013	30	37.7746	47.8376	100001	100000	100003
31.55	55.4574	0	6.10273	0.00016618	0.0103568	34.1429	35.2013	30	37.7747	47.8376	100001	100000	100003
31.6	55.4574	0	6.10276	0.000161536	0.0102004	34.1429	35.2013	30	37.7747	47.8376	100001	100000	100003
31.65	55.4574	0	6.10279	0.000157021	0.0100463	34.143	35.2013	30	37.7747	47.8377	100001	100000	100003
31.7	55.4575	0	6.10282	0.000152633	0.00989454	34.143	35.2013	30	37.7748	47.8377	100001	100000	100003
31.75	55.4575	0	6.10285	0.000148367	0.00974506	34.143	35.2013	30	37.7748	47.8377	100001	100000	100003
31.8	55.4575	0	6.10288	0.00014422	0.00959784	34.143	35.2013	30	37.7748	47.8378	100001	100000	100003
31.85	55.4575	0	6.10291	0.000140189	0.00945284	34.143	35.2013	30	37.7749	47.8378	100001	100000	100003
31.9	55.4575	0	6.10294	0.000136271	0.00931002	34.143	35.2013	30	37.7749	47.8378	100001	100000	100003
31.95	55.4575	0	6.10297	0.000132463	0.00916936	34.1431	35.2013	30	37.7749	47.8379	100001	100000	100003
32	55.4575	0	6.103	0.000128761	0.00903082	34.1431	35.2014	30	37.775	47.8379	100001	100000	100003
32.05	55.4575	0	6.10303	0.000125162	0.00889437	34.1431	35.2014	30	37.775	47.8379	100001	100000	100003
32.1	55.4575	0	6.10305	0.000121664	0.00875997	34.1431	35.2014	30	37.775	47.8379	100001	100000	100003
32.15	55.4575	0	6.10308	0.000118263	0.0086276	34.1431	35.2014	30	37.775	47.838	100001	100000	100003
32.2	55.4575	0	6.10311	0.000114958	0.00849723	34.1431	35.2014	30	37.7751	47.838	100001	100000	100003
32.25	55.4575	0	6.10313	0.000111745	0.00836882	34.1432	35.2014	30	37.7751	47.838	100001	100000	100003
32.3	55.4575	0	6.10316	0.000108622	0.00824235	34.1432	35.2014	30	37.7751	47.8381	100001	100000	100003
32.35	55.4575	0	6.10318	0.000105586	0.00811779	34.1432	35.2014	30	37.7752	47.8381	100001	100000	100003
32.4	55.4575	0	6.10321	0.000102635	0.0079951	34.1432	35.2014	30	37.7752	47.8381	100001	100000	100003
32.45	55.4575	0	6.10323	9.97667e-05	0.00787427	34.1432	35.2014	30	37.7752	47.8381	100001	100000	100003
32.5	55.4575	0	6.10326	9.69783e-05	0.00775526	34.1432	35.2014	30	37.7752	47.8382	100001	100000	100003
32.55	55.4575	0	6.10328	9.42679e-05	0.00763804	34.1432	35.2014	30	37.7753	47.8382	100001	100000	100003
32.6	55.4575	0	6.10331	9.16332e-05	0.0075226	34.1432	35.2014	30	37.7753	47.8382	100001	100000	100003
32.65	55.4575	0	6.10333	8.90722e-05	0.00740889	34.1433	35.2014	30	37.7753	47.8382	100001	100000	100003
32.7	55.4575	0	6.10335	8.65826e-05	0.0072969	34.1433	35.2014	30	37.7753	47.8382	100001	100000	100003
32.75	55.4575	0	6.10337	8.41627e-05	0.0071866	34.1433	35.2014	30	37.7754	47.8383	100001	100000	100003
32.8	55.4575	0	6.1034	8.18105e-05	0.00707797	34.1433	35.2014	30	37.7754	47.8383	100001	100000	100003
32.85	55.4575	0	6.10342	7.9524e-05	0.00697097	34.1433	35.2014	30	37.7754	47.8383	100001	100000	100003
32.9	55.4575	0	6.10344	7.73014e-05	0.00686559	34.1433	35.2014	30	37.7754	47.8383	100001	100000	100003
32.95	55.4575	0	6.10346	7.51408e-05	0.0067618	34.1433	35.2014	30	37.7755	47.8384	100001	100000	100003
33	55.4575	0	6.10348	7.30407e-05	0.00665958	34.1433	35.2014	30	37.7755	47.8384	100001	100000	100003
33.05	55.4575	0	6.1035	7.09992e-05	0.00655889	34.1434	35.2014	30	37.7755	47.8384	100001	100000	100003
33.1	55.4576	0	6.10352	6.90149e-05	0.00645973	34.1434	35.2014	30	37.7755	47.8384	100001	100000	100003
33.15	55.4576	0	6.10354	6.7086e-05	0.00636207	34.1434	35.2014	30	37.7755	47.8384	100001	100000	100003
33.2	55.4576	0	6.10356	6.5211e-05	0.00626588	34.1434	35.2014	30	37.7756	47.8385	100001	100000	100003
33.25	55.4576	0	6.10358	6.33884e-05	0.00617114	34.1434	35.2014	30	37.7756	47.8385	100001	100000	100003
33.3	55.4576	0	6.1036	6.16167e-05	0.00607783	34.1434	35.2014	30	37.7756	47.8385	100001	100000	100003
33.35	55.4576	0	6.10362	5.98945e-05	0.00598593	34.1434	35.2014	30	37.7756	47.8385	100001	100000	100003
33.4	55.4576	0	6.10364	5.82205e-05	0.00589542	34.1434	35.2014	30	37.7756	47.8385	100001	100000	100003
33.45	55.4576	0	6.10365	5.65933e-05	0.00580628	34.1434	35.2014	30	37.7757	47.8385	100001	100000	100003
33.5	55.4576	0	6.10367	5.50115e-05	0.00571848	34.1435	35.2014	30	37.7757	47.8386	100001	100000	100003
33.55	55.4576	0	6.10369	5.3474e-05	0.005632	34.1435	35.2014	30	37.7757	47.8386	100001	100000	100003
33.6	55.4576	0	6.10371	5.19794e-05	0.00554683	34.1435	35.2014	30	37.7757	47.8386	100001	100000	100003
33.65	55.4576	0	6.10372	5.05265e-05	0.00546295	34.1435	35.2014	30	37.7757	47.8386	100001	100000	100003
33.7	55.4576	0	6.10374	4.91144e-05	0.00538034	34.1435	35.2014	30	37.7757	47.8386	100001	100000	100003
33.75	55.4576	0	6.10376	4.77416e-05	0.00529897	34.1435	35.2014	30	37.7758	47.8386	100001	100000	100003
33.8	55.4576	0	6.10377	4.64073e-05	0.00521883	34.1435	35.2014	30	37.7758	47.8387	100001	100000	100003
33.85	55.4576	0	6.10379	4.51102e-05	0.00513991	34.1435	35.2014	30	37.7758	47.8387	100001	100000	100003
33.9	55.4576	0	6.1038	4.38494e-05	0.00506217	34.1435	35.2014	30	37.7758	47.8387	100001	100000	100003
33.95	55.4576	0	6.10382	4.26238e-05	0.00498561	34.1435	35.2014	30	37.7758	47.8387	100001	100000	100003
34	55.4576	0	6.10383	4.14325e-05	0.0049102	34.1436	35.2014	30	37.7759	47.8387	100001	100000	100003
34.05	55.4576	0	6.10385	4.02744e-05	0.00483594	34.1436	35.2014	30	37.7759	47.8387	100001	100000	100003
34.1	55.4576	0	6.10386	3.91488e-05	0.00476279	34.1436	35.2014	30	37.7759	47.8388	100001	100000	100003
34.15	55.4576	0	6.10388	3.80546e-05	0.00469076	34.1436	35.2014	30	37.7759	47.8388	100001	100000	100003
34.2	55.4576	0	6.10389	3.6991e-05	0.0046198	34.1436	35.2014	30	37.7759	47.8388	100001	100000	100003
34.25	55.4576	0	6.10391	3.5957e-05	0.00454993	34.1436	35.2014	30	37.7759	47.8388	100001	100000	100003
34.3	55.4576	0	6.10392	3.49521e-05	0.0044811	34.1436	35.2014	30	37.7759	47.8388	100001	100000	100003
34.35	55.4576	0	6.10393	3.39752e-05	0.00441332	34.1436	35.2014	30	37.776	47.8388	100001	100000	100003
34.4	55.4576	0	6.10395	3.30256e-05	0.00434656	34.1436	35.2014	30	37.776	47.8388	100001	100000	100003
34.45	55.4576	0	6.10396	3.21025e-05	0.00428081	34.1436	35.2014	30	37.776	47.8388	100001	100000	100003
34.5	55.4576	0	6.10397	3.12052e-05	0.00421605	34.1436	35.2014	30	37.776	47.8389	100001	100000	100003
34.55	55.4576	0	6.10399	3.0333e-05	0.00415228	34.1436	35.2014	30	37.776	47.8389	100001	100000	100003
34.6	55.4576	0	6.104	2.94852e-05	0.00408946	34.1436	35.2014	30	37.776	47.8389	100001	100000	100003
34.65	55.4576	0	6.10401	2.86611e-05	0.0040276	34.1437	35.2014	30	37.776	47.8389	100001	100000	100003
34.7	55.4576	0	6.10402	2.786e-05	0.00396667	34.1437	35.2014	30	37.7761	47.8389	100001	100000	100003
34.75	55.4576	0	6.10404	2.70813e-05	0.00390666	34.1437	35.2014	30	37.7761	47.8389	100001	100000	100003
34.8	55.4576	0	6.10405	2.63244e-05	0.00384755	34.1437	35.2014	30	37.7761	47.8389	100001	100000	100003
34.85	55.4576	0	6.10406	2.55886e-05	0.00378935	34.1437	35.2014	30	37.7761	47.8389	100001	100000	100003
34.9	55.4576	0	6.10407	2.48734e-05	0.00373202	34.1437	35.2014	30	37.7761	47.839	100001	100000	100003
34.95	55.4576	0	6.10408	2.41782e-05	0.00367555	34.1437	35.2014	30	37.7761	47.839	100001	100000	100003
35	55.4576	0	6.10409	2.35024e-05	0.00361994	34.1437	35.2014	30	37.7761	47.839	100001	100000	100003
35.05	55.4576	0	6.10411	2.28455e-05	0.00356517	34.1437	35.2014	30	37.7761	47.839	100001	100000	100003
35.1	55.4576	0	6.10412	2.2207e-05	0.00351123	34.1437	35.2014	30	37.7761	47.839	100001	100000	100003
35.15	55.4576	0	6.10413	2.15863e-05	0.00345811	34.1437	35.2014	30	37.7762	47.839	100001	100000	100003
35.2	55.4576	0	6.10414	2.09829e-05	0.00340578	34.1437	35.2014	30	37.7762	47.839	100001	100000	100003
35.25	55.4576	0	6.10415	2.03965e-05	0.00335425	34.1437	35.2014	30	37.7762	47.839	100001	100000	100003
35.3	55.4576	0	6.10416	1.98264e-05	0.0033035	34.1437	35.2014	30	37.7762	47.839	100001	100000	100003
35.35	55.4576	0	6.10417	1.92722e-05	0.00325352	34.1437	35.2014	30	37.7762	47.839	100001	100000	100003
35.4	55.4576	0	6.10418	1.87336e-05	0.00320429	34.1438	35.2014	30	37.7762	47.8391	100001	100000	100003
35.45	55.4576	0	6.10419	1.821e-05	0.0031558	34.1438	35.2014	30	37.7762	47.8391	100001	100000	100003
35.5	55.4576	0	6.1042	1.7701e-05	0.00310805	34.1438	35.2014	30	37.7762	47.8391	100001	100000	100003
35.55	55.4576	0	6.10421	1.72062e-05	0.00306102	34.1438	35.2014	30	37.7762	47.8391	100001	100000	100003
35.6	55.4576	0	6.10422	1.67253e-05	0.0030147	34.1438	35.2014	30	37.7762	47.8391	100001	100000	100003
35.65	55.4576	0	6.10423	1.62578e-05	0.00296908	34.1438	35.2014	30	37.7763	47.8391	100001	100000	100003
35.7	55.4576	0	6.10423	1.58034e-05	0.00292415	34.1438	35.2014	30	37.7763	47.8391	100001	100000	100003
35.75	55.4576	0	6.10424	1.53617e-05	0.0028799	34.1438	35.2014	30	37.7763	47.8391	100001	100000	100003
35.8	55.4576	0	6.10425	1.49323e-05	0.00283632	34.1438	35.2014	30	37.7763	47.8391	100001	100000	100003
35.85	55.4576	0	6.10426	1.4515e-05	0.0027934	34.1438	35.2014	30	37.7763	47.8391	100001	100000	100003
35.9	55.4576	0	6.10427	1.41093e-05	0.00275112	34.1438	35.2014	30	37.7763	47.8391	100001	100000	100003
35.95	55.4576	0	6.10428	1.37149e-05	0.00270949	34.1438	35.2014	30	37.7763	47.8391	100001	100000	100003
36	55.4576	0	6.10429	1.33316e-05	0.00266849	34.1438	35.2014	30	37.7763	47.8392	100001	100000	100003
36.05	55.4576	0	6.10429	1.2959e-05	0.0026281	34.1438	35.2014	30	37.7763	47.8392	100001	100000	100003
36.1	55.4576	0	6.1043	1.25967e-05	0.00258833	34.1438	35.2014	30	37.7763	47.8392	100001	100000	100003
36.15	55.4576	0	6.10431	1.22447e-05	0.00254916	34.1438	35.2014	30	37.7763	47.8392	100001	100000	100003
36.2	55.4576	0	6.10432	1.19024e-05	0.00251058	34.1438	35.2014	30	37.7764	47.8392	100001	100000	100003
36.25	55.4576	0	6.10433	1.15697e-05	0.00247258	34.1438	35.2014	30	37.7764	47.8392	100001	100000	100003
36.3	55.4576	0	6.10433	1.12464e-05	0.00243516	34.1438	35.2014	30	37.7764	47.8392	100001	100000	100003
36.35	55.4576	0	6.10434	1.0932e-05	0.00239831	34.1438	35.2014	30	37.7764	47.8392	100001	100000	100003
36.4	55.4576	0	6.10435	1.06265e-05	0.00236201	34.1439	35.2014	30	37.7764	47.8392	100001	100000	100003
36.45	55.4576	0	6.10435	1.03294e-05	0.00232626	34.1439	35.2014	30	37.7764	47.8392	100001	100000	100003
36.5	55.4576	0	6.10436	1.00407e-05	0.00229105	34.1439	35.2014	30	37.7764	47.8392	100001	100000	100003
36.55	55.4576	0	6.10437	9.76008e-06	0.00225638	34.1439	35.2014	30	37.7764	47.8392	100001	100000	100003
36.6	55.4576	0	6.10438	9.48728e-06	0.00222223	34.1439	35.2014	30	37.7764	47.8392	100001	100000	100003
36.65	55.4576	0	6.10438	9.22211e-06	0.00218859	34.1439	35.2014	30	37.7764	47.8392	100001	100000	100003
36.7	55.4576	0	6.10439	8.96434e-06	0.00215547	34.1439	35.2014	30	37.7764	47.8393	100001	100000	100003
36.75	55.4576	0	6.1044	8.71377e-06	0.00212284	34.1439	35.2014	30	37.7764	47.8393	100001	100000	100003
36.8	55.4576	0	6.1044	8.47022e-06	0.00209071	34.1439	35.2014	30	37.7764	47.8393	100001	100000	100003
36.85	55.4576	0	6.10441	8.23347e-06	0.00205907	34.1439	35.2014	30	37.7764	47.8393	100001	100000	100003
36.9	55.4576	0	6.10441	8.00335e-06	0.0020279	34.1439	35.2014	30	37.7765	47.8393	100001	100000	100003
36.95	55.4576	0	6.10442	7.77965e-06	0.00199721	34.1439	35.2014	30	37.7765	47.8393	100001	100000	100003
37	55.4576	0	6.10443	7.5622e-06	0.00196698	34.1439	35.2014	30	37.7765	47.8393	100001	100000	100003
37.05	55.4576	0	6.10443	7.35082e-06	0.0019372	34.1439	35.2014	30	37.7765	47.8393	100001	100000	100003
37.1	55.4576	0	6.10444	7.14536e-06	0.00190788	34.1439	35.2014	30	37.7765	47.8393	100001	100000	100003
37.15	55.4576	0	6.10444	6.94565e-06	0.001879	34.1439	35.2014	30	37.7765	47.8393	100001	100000	100003
37.2	55.4576	0	6.10445	6.75151e-06	0.00185056	34.1439	35.2014	30	37.7765	47.8393	100001	100000	100003
37.25	55.4576	0	6.10446	6.5628e-06	0.00182255	34.1439	35.2014	30	37.7765	47.8393	100001	100000	100003
37.3	55.4576	0	6.10446	6.37937e-06	0.00179496	34.1439	35.2014	30	37.7765	47.8393	100001	100000	100003
37.35	55.4576	0	6.10447	6.20105e-06	0.00176779	34.1439	35.2014	30	37.7765	47.8393	100001	100000	100003
37.4	55.4576	0	6.10447	6.02773e-06	0.00174103	34.1439	35.2014	30	37.7765	47.8393	100001	100000	100003
37.45	55.4576	0	6.10448	5.85925e-06	0.00171467	34.1439	35.2014	30	37.7765	47.8393	100001	100000	100003
37.5	55.4576	0	6.10448	5.69548e-06	0.00168872	34.1439	35.2014	30	37.7765	47.8393	100001	100000	100003
37.55	55.4576	0	6.10449	5.53629e-06	0.00166315	34.1439	35.2014	30	37.7765	47.8393	100001	100000	100003
37.6	55.4576	0	6.10449	5.38155e-06	0.00163798	34.1439	35.2014	30	37.7765	47.8394	100001	100000	100003
37.65	55.4576	0	6.1045	5.23112e-06	0.00161318	34.1439	35.2014	30	37.7765	47.8394	100001	100000	100003
37.7	55.4576	0	6.1045	5.08491e-06	0.00158876	34.1439	35.2014	30	37.7765	47.8394	100001	100000	100003
37.75	55.4576	0	6.10451	4.94278e-06	0.00156471	34.1439	35.2014	30	37.7765	47.8394	100001	100000	100003
37.8	55.4576	0	6.10451	4.80463e-06	0.00154102	34.1439	35.2014	30	37.7766	47.8394	100001	100000	100003
37.85	55.4576	0	6.10452	4.67034e-06	0.0015177	34.144	35.2014	30	37.7766	47.8394	100001	100000	100003
37.9	55.4576	0	6.10452	4.5398e-06	0.00149472	34.144	35.2014	30	37.7766	47.8394	100001	100000	100003
37.95	55.4576	0	6.10453	4.4129e-06	0.00147209	34.144	35.2014	30	37.7766	47.8394	100001	100000	100003
38	55.4576	0	6.10453	4.28956e-06	0.00144981	34.144	35.2014	30	37.7766	47.8394	100001	100000	100003
38.05	55.4576	0	6.10454	4.16966e-06	0.00142786	34.144	35.2014	30	37.7766	47.8394	100001	100000	100003
38.1	55.4576	0	6.10454	4.05312e-06	0.00140624	34.144	35.2014	30	37.7766	47.8394	100001	100000	100003
38.15	55.4576	0	6.10454	3.93983e-06	0.00138495	34.144	35.2014	30	37.7766	47.8394	100001	100000	100003
38.2	55.4576	0	6.10455	3.82971e-06	0.00136399	34.144	35.2014	30	37.7766	47.8394	100001	100000	100003
38.25	55.4576	0	6.10455	3.72266e-06	0.00134334	34.144	35.2014	30	37.7766	47.8394	100001	100000	100003
38.3	55.4576	0	6.10456	3.61861e-06	0.001323	34.144	35.2014	30	37.7766	47.8394	100001	100000	100003
38.35	55.4576	0	6.10456	3.51747e-06	0.00130297	34.144	35.2014	30	37.7766	47.8394	100001	100000	100003
38.4	55.4576	0	6.10456	3.41915e-06	0.00128324	34.144	35.2014	30	37.7766	47.8394	100001	100000	100003
38.45	55.4576	0	6.10457	3.32358e-06	0.00126382	34.144	35.2014	30	37.7766	47.8394	100001	100000	100003
38.5	55.4576	0	6.10457	3.23069e-06	0.00124468	34.144	35.2014	30	37.7766	47.8394	100001	100000	100003
38.55	55.4576	0	6.10458	3.14039e-06	0.00122584	34.144	35.2014	30	37.7766	47.8394	100001	100000	100003
38.6	55.4576	0	6.10458	3.05261e-06	0.00120728	34.144	35.2014	30	37.7766	47.8394	100001	100000	100003
38.65	55.4576	0	6.10458	2.96728e-06	0.001189	34.144	35.2014	30	37.7766	47.8394	100001	100000	100003
38.7	55.4576	0	6.10459	2.88435e-06	0.001171	34.144	35.2014	30	37.7766	47.8394	100001	100000	100003
38.75	55.4576	0	6.10459	2.80373e-06	0.00115327	34.144	35.2014	30	37.7766	47.8394	100001	100000	100003
38.8	55.4576	0	6.10459	2.72536e-06	0.00113581	34.144	35.2014	30	37.7766	47.8394	100001	100000	100003
38.85	55.4576	0	6.1046	2.64918e-06	0.00111862	34.144	35.2014	30	37.7766	47.8394	100001	100000	100003
38.9	55.4576	0	6.1046	2.57513e-06	0.00110168	34.144	35.2014	30	37.7766	47.8394	100001	100000	100003
38.95	55.4576	0	6.1046	2.50316e-06	0.001085	34.144	35.2014	30	37.7766	47.8395	100001	100000	100003
39	55.4576	0	6.10461	2.43319e-06	0.00106857	34.144	35.2014	30	37.7767	47.8395	100001	100000	100003
39.05	55.4576	0	6.10461	2.36518e-06	0.00105239	34.144	35.2014	30	37.7767	47.8395	100001	100000	100003
39.1	55.4576	0	6.10461	2.29907e-06	0.00103646	34.144	35.2014	30	37.7767	47.8395	100001	100000	100003
39.15	55.4576	0	6.10462	2.23481e-06	0.00102077	34.144	35.2014	30	37.7767	47.8395	100001	100000	100003
39.2	55.4576	0	6.10462	2.17234e-06	0.00100531	34.144	35.2014	30	37.7767	47.8395	100001	100000	100003
39.25	55.4576	0	6.10462	2.11163e-06	0.000990091	34.144	35.2014	30	37.7767	47.8395	100001	100000	100003
39.3	55.4576	0	6.10463	2.0526e-06	0.0009751	34.144	35.2014	30	37.7767	47.8395	100001	100000	100003
39.35	55.4576	0	6.10463	1.99523e-06	0.000960336	34.144	35.2014	30	37.7767	47.8395	100001	100000	100003
39.4	55.4576	0	6.10463	1.93946e-06	0.000945796	34.144	35.2014	30	37.7767	47.8395	100001	100000	100003
39.45	55.4576	0	6.10463	1.88525e-06	0.000931476	34.144	35.2014	30	37.7767	47.8395	100001	100000	100003
39.5	55.4576	0	6.10464	1.83256e-06	0.000917372	34.144	35.2014	30	37.7767	47.8395	100001	100000	100003
39.55	55.4576	0	6.10464	1.78134e-06	0.000903482	34.144	35.2014	30	37.7767	47.8395	100001	100000	100003
39.6	55.4576	0	6.10464	1.73155e-06	0.000889802	34.144	35.2014	30	37.7767	47.8395	100001	100000	100003
39.65	55.4576	0	6.10465	1.68315e-06	0.000876329	34.144	35.2014	30	37.7767	47.8395	100001	100000	100003
39.7	55.4576	0	6.10465	1.6361e-06	0.000863061	34.144	35.2014	30	37.7767	47.8395	100001	100000	100003
39.75	55.4576	0	6.10465	1.59037e-06	0.000849993	34.144	35.2014	30	37.7767	47.8395	100001	100000	100003
39.8	55.4576	0	6.10465	1.54592e-06	0.000837123	34.144	35.2014	30	37.7767	47.8395	100001	100000	100003
39.85	55.4576	0	6.10466	1.50271e-06	0.000824447	34.144	35.2014	30	37.7767	47.8395	100001	100000	100003
39.9	55.4576	0	6.10466	1.46071e-06	0.000811964	34.144	35.2014	30	37.7767	47.8395	100001	100000	100003
39.95	55.4576	0	6.10466	1.41988e-06	0.000799669	34.144	35.2014	30	37.7767	47.8395	100001	100000	100003
40	55.4576	0	6.10466	1.38019e-06	0.000787561	34.144	35.2014	30	37.7767	47.8395	100001	100000	100003
40.05	55.4576	0	6.10467	1.34161e-06	0.000775636	34.144	35.2014	30	37.7767	47.8395	100001	100000	100003
40.1	55.4576	0	6.10467	1.30411e-06	0.000763892	34.144	35.2014	30	37.7767	47.8395	100001	100000	100003
40.15	55.4576	0	6.10467	1.26766e-06	0.000752325	34.144	35.2014	30	37.7767	47.8395	100001	100000	100003
40.2	55.4576	0	6.10467	1.23223e-06	0.000740933	34.144	35.2014	30	37.7767	47.8395	100001	100000	100003
40.25	55.4576	0	6.10468	1.19779e-06	0.000729714	34.144	35.2014	30	37.7767	47.8395	100001	100000	100003
40.3	55.4576	0	6.10468	1.16431e-06	0.000718665	34.144	35.2014	30	37.7767	47.8395	100001	100000	100003
40.35	55.4576	0	6.10468	1.13176e-06	0.000707783	34.144	35.2014	30	37.7767	47.8395	100001	100000	100003
40.4	55.4576	0	6.10468	1.10013e-06	0.000697065	34.144	35.2014	30	37.7767	47.8395	100001	100000	100003
40.45	55.4576	0	6.10468	1.06938e-06	0.00068651	34.1441	35.2014	30	37.7767	47.8395	100001	100000	100003
40.5	55.4576	0	6.10469	1.03949e-06	0.000676115	34.1441	35.2014	30	37.7767	47.8395	100001	100000	100003
40.55	55.4576	0	6.10469	1.01043e-06	0.000665877	34.1441	35.2014	30	37.7767	47.8395	100001	100000	100003
40.6	55.4576	0	6.10469	9.82192e-07	0.000655794	34.1441	35.2014	30	37.7767	47.8395	100001	100000	100003
40.65	55.4576	0	6.10469	9.54739e-07	0.000645864	34.1441	35.2014	30	37.7767	47.8395	100001	100000	100003
40.7	55.4576	0	6.10469	9.28053e-07	0.000636084	34.1441	35.2014	30	37.7767	47.8395	100001	100000	100003
40.75	55.4576	0	6.1047	9.02112e-07	0.000626452	34.1441	35.2014	30	37.7767	47.8395	100001	100000	100003
40.8	55.4576	0	6.1047	8.76897e-07	0.000616966	34.1441	35.2014	30	37.7767	47.8395	100001	100000	100003
40.85	55.4576	0	6.1047	8.52387e-07	0.000607624	34.1441	35.2014	30	37.7767	47.8395	100001	100000	100003
40.9	55.4576	0	6.1047	8.28562e-07	0.000598423	34.1441	35.2014	30	37.7767	47.8395	100001	100000	100003
40.95	55.4576	0	6.1047	8.05403e-07	0.000589361	34.1441	35.2014	30	37.7767	47.8395	100001	100000	100003
41	55.4576	0	6.10471	7.82891e-07	0.000580436	34.1441	35.2014	30	37.7767	47.8395	100001	100000	100003
41.05	55.4576	0	6.10471	7.61008e-07	0.000571647	34.1441	35.2014	30	37.7768	47.8395	100001	100000	100003
41.1	55.4576	0	6.10471	7.39737e-07	0.000562991	34.1441	35.2014	30	37.7768	47.8395	100001	100000	100003
41.15	55.4576	0	6.10471	7.1906e-07	0.000554465	34.1441	35.2014	30	37.7768	47.8396	100001	100000	100003
41.2	55.4576	0	6.10471	6.98962e-07	0.000546069	34.1441	35.2014	30	37.7768	47.8396	100001	100000	100003
41.25	55.4576	0	6.10471	6.79425e-07	0.0005378	34.1441	35.2014	30	37.7768	47.8396	100001	100000	100003
41.3	55.4576	0	6.10472	6.60434e-07	0.000529656	34.1441	35.2014	30	37.7768	47.8396	100001	100000	100003
41.35	55.4576	0	6.10472	6.41974e-07	0.000521636	34.1441	35.2014	30	37.7768	47.8396	100001	100000	100003
41.4	55.4576	0	6.10472	6.2403e-07	0.000513736	34.1441	35.2014	30	37.7768	47.8396	100001	100000	100003
41.45	55.4576	0	6.10472	6.06588e-07	0.000505957	34.1441	35.2014	30	37.7768	47.8396	100001	100000	100003
41.5	55.4576	0	6.10472	5.89633e-07	0.000498295	34.1441	35.2014	30	37.7768	47.8396	100001	100000	100003
41.55	55.4576	0	6.10472	5.73152e-07	0.000490749	34.1441	35.2014	30	37.7768	47.8396	100001	100000	100003
41.6	55.4576	0	6.10472	5.57132e-07	0.000483318	34.1441	35.2014	30	37.7768	47.8396	100001	100000	100003
41.65	55.4576	0	6.10473	5.41559e-07	0.000475999	34.1441	35.2014	30	37.7768	47.8396	100001	100000	100003
41.7	55.4576	0	6.10473	5.26422e-07	0.000468791	34.1441	35.2014	30	37.7768	47.8396	100001	100000	100003
41.75	55.4576	0	6.10473	5.11708e-07	0.000461692	34.1441	35.2014	30	37.7768	47.8396	100001	100000	100003
41.8	55.4576	0	6.10473	4.97405e-07	0.0004547	34.1441	35.2014	30	37.7768	47.8396	100001	100000	100003
41.85	55.4576	0	6.10473	4.83502e-07	0.000447814	34.1441	35.2014	30	37.7768	47.8396	100001	100000	100003
41.9	55.4576	0	6.10473	4.69988e-07	0.000441033	34.1441	35.2014	30	37.7768	47.8396	100001	100000	100003
41.95	55.4576	0	6.10473	4.56851e-07	0.000434354	34.1441	35.2014	30	37.7768	47.8396	100001	100000	100003
42	55.4576	0	6.10474	4.44081e-07	0.000427777	34.1441	35.2014	30	37.7768	47.8396	100001	100000	100003
42.05	55.4576	0	6.10474	4.31669e-07	0.000421299	34.1441	35.2014	30	37.7768	47.8396	100001	100000	100003
42.1	55.4576	0	6.10474	4.19603e-07	0.000414919	34.1441	35.2014	30	37.7768	47.8396	100001	100000	100003
42.15	55.4576	0	6.10474	4.07875e-07	0.000408635	34.1441	35.2014	30	37.7768	47.8396	100001	100000	100003
42.2	55.4576	0	6.10474	3.96474e-07	0.000402447	34.1441	35.2014	30	37.7768	47.8396	100001	100000	100003
42.25	55.4576	0	6.10474	3.85392e-07	0.000396353	34.1441	35.2014	30	37.7768	47.8396	100001	100000	100003
42.3	55.4576	0	6.10474	3.7462e-07	0.00039035	34.1441	35.2014	30	37.7768	47.8396	100001	100000	100003
42.35	55.4576	0	6.10474	3.64149e-07	0.000384439	34.1441	35.2014	30	37.7768	47.8396	100001	100000	100003
42.4	55.4576	0	6.10475	3.53971e-07	0.000378617	34.1441	35.2014	30	37.7768	47.8396	100001	100000	100003
42.45	55.4576	0	6.10475	3.44077e-07	0.000372884	34.1441	35.2014	30	37.7768	47.8396	100001	100000	100003
42.5	55.4576	0	6.10475	3.34459e-07	0.000367237	34.1441	35.2014	30	37.7768	47.8396	100001	100000	100003
42.55	55.4576	0	6.10475	3.25111e-07	0.000361675	34.1441	35.2014	30	37.7768	47.8396	100001	100000	100003
42.6	55.4576	0	6.10475	3.16023e-07	0.000356198	34.1441	35.2014	30	37.7768	47.8396	100001	100000	100003
42.65	55.4576	0	6.10475	3.0719e-07	0.000350804	34.1441	35.2014	30	37.7768	47.8396	100001	100000	100003
42.7	55.4576	0	6.10475	2.98604e-07	0.000345491	34.1441	35.2014	30	37.7768	47.8396	100001	100000	100003
42.75	55.4576	0	6.10475	2.90258e-07	0.000340259	34.1441	35.2014	30	37.7768	47.8396	100001	100000	100003
42.8	55.4576	0	6.10475	2.82145e-07	0.000335106	34.1441	35.2014	30	37.7768	47.8396	100001	100000	100003
42.85	55.4576	0	6.10476	2.74258e-07	0.000330032	34.1441	35.2014	30	37.7768	47.8396	100001	100000	100003
42.9	55.4576	0	6.10476	2.66592e-07	0.000325034	34.1441	35.2014	30	37.7768	47.8396	100001	100000	100003
42.95	55.4576	0	6.10476	2.59141e-07	0.000320111	34.1441	35.2014	30	37.7768	47.8396	100001	100000	100003
43	55.4576	0	6.10476	2.51897e-07	0.000315263	34.1441	35.2014	30	37.7768	47.8396	100001	100000	100003
43.05	55.4576	0	6.10476	2.44857e-07	0.000310489	34.1441	35.2014	30	37.7768	47.8396	100001	100000	100003
43.1	55.4576	0	6.10476	2.38013e-07	0.000305787	34.1441	35.2014	30	37.7768	47.8396	100001	100000	100003
43.15	55.4576	0	6.10476	2.3136e-07	0.000301156	34.1441	35.2014	30	37.7768	47.8396	100001	100000	100003
43.2	55.4576	0	6.10476	2.24893e-07	0.000296595	34.1441	35.2014	30	37.7768	47.8396	100001	100000	100003
43.25	55.4576	0	6.10476	2.18607e-07	0.000292104	34.1441	35.2014	30	37.7768	47.8396	100001	100000	100003
43.3	55.4576	0	6.10476	2.12497e-07	0.00028768	34.1441	35.2014	30	37.7768	47.8396	100001	100000	100003
43.35	55.4576	0	6.10476	2.06557e-07	0.000283323	34.1441	35.2014	30	37.7768	47.8396	100001	100000	100003
43.4	55.4576	0	6.10477	2.00784e-07	0.000279033	34.1441	35.2014	30	37.7768	47.8396	100001	100000	100003
43.45	55.4576	0	6.10477	1.95172e-07	0.000274807	34.1441	35.2014	30	37.7768	47.8396	100001	100000	100003
43.5	55.4576	0	6.10477	1.89716e-07	0.000270645	34.1441	35.2014	30	37.7768	47.8396	100001	100000	100003
43.55	55.4576	0	6.10477	1.84413e-07	0.000266546	34.1441	35.2014	30	37.7768	47.8396	100001	100000	100003
43.6	55.4576	0	6.10477	1.79259e-07	0.00026251	34.1441	35.2014	30	37.7768	47.8396	100001	100000	100003
43.65	55.4576	0	6.10477	1.74248e-07	0.000258534	34.1441	35.2014	30	37.7768	47.8396	100001	100000	100003
43.7	55.4576	0	6.10477	1.69378e-07	0.000254619	34.1441	35.2014	30	37.7768	47.8396	100001	100000	100003
43.75	55.4576	0	6.10477	1.64644e-07	0.000250763	34.1441	35.2014	30	37.7768	47.8396	100001	100000	100003
43.8	55.4576	0	6.10477	1.60042e-07	0.000246965	34.1441	35.2014	30	37.7768	47.8396	100001	100000	100003
43.85	55.4576	0	6.10477	1.55568e-07	0.000243225	34.1441	35.2014	30	37.7768	47.8396	100001	100000	100003
43.9	55.4576	0	6.10477	1.5122e-07	0.000239541	34.1441	35.2014	30	37.7768	47.8396	100001	100000	100003
43.95	55.4576	0	6.10477	1.46993e-07	0.000235914	34.1441	35.2014	30	37.7768	47.8396	100001	100000	100003
44	55.4576	0	6.10477	1.42884e-07	0.000232341	34.1441	35.2014	30	37.7768	47.8396	100001	100000	100003
44.05	55.4576	0	6.10478	1.38891e-07	0.000228822	34.1441	35.2014	30	37.7768	47.8396	100001	100000	100003
44.1	55.4576	0	6.10478	1.35008e-07	0.000225357	34.1441	35.2014	30	37.7768	47.8396	100001	100000	100003
44.15	55.4576	0	6.10478	1.31235e-07	0.000221944	34.1441	35.2014	30	37.7768	47.8396	100001	100000	100003
44.2	55.4576	0	6.10478	1.27567e-07	0.000218583	34.1441	35.2014	30	37.7768	47.8396	100001	100000	100003
44.25	55.4576	0	6.10478	1.24001e-07	0.000215272	34.1441	35.2014	30	37.7768	47.8396	100001	100000	100003
44.3	55.4576	0	6.10478	1.20535e-07	0.000212012	34.1441	35.2014	30	37.7768	47.8396	100001	100000	100003
44.35	55.4576	0	6.10478	1.17166e-07	0.000208801	34.1441	35.2014	30	37.7768	47.8396	100001	100000	100003
44.4	55.4576	0	6.10478	1.13891e-07	0.000205639	34.1441	35.2014	30	37.7768	47.8396	100001	100000	100003
44.45	55.4576	0	6.10478	1.10708e-07	0.000202525	34.1441	35.2014	30	37.7768	47.8396	100001	100000	100003
44.5	55.4576	0	6.10478	1.07613e-07	0.000199457	34.1441	35.2014	30	37.7768	47.8396	100001	100000	100003
44.55	55.4576	0	6.10478	1.04605e-07	0.000196437	34.1441	35.2014	30	37.7768	47.8396	100001	100000	100003
44.6	55.4576	0	6.10478	1.01681e-07	0.000193462	34.1441	35.2014	30	37.7768	47.8396	100001	100000	100003
44.65	55.4576	0	6.10478	9.88394e-08	0.000190532	34.1441	35.2014	30	37.7768	47.8396	100001	100000	100003
44.7	55.4576	0	6.10478	9.60767e-08	0.000187646	34.1441	35.2014	30	37.7768	47.8396	100001	100000	100003
44.75	55.4576	0	6.10478	9.33914e-08	0.000184804	34.1441	35.2014	30	37.7768	47.8396	100001	100000	100003
44.8	55.4576	0	6.10479	9.0781e-08	0.000182006	34.1441	35.2014	30	37.7768	47.8396	100001	100000	100003
44.85	55.4576	0	6.10479	8.82437e-08	0.000179249	34.1441	35.2014	30	37.7768	47.8396	100001	100000	100003
44.9	55.4576	0	6.10479	8.57773e-08	0.000176534	34.1441	35.2014	30	37.7768	47.8396	100001	100000	100003
44.95	55.4576	0	6.10479	8.33799e-08	0.000173861	34.1441	35.2014	30	37.7768	47.8396	100001	100000	100003
45	55.4576	0	6.10479	8.10495e-08	0.000171228	34.1441	35.2014	30	37.7768	47.8396	100001	100000	100003
45.05	55.4576	0	6.10479	7.87841e-08	0.000168635	34.1441	35.2014	30	37.7768	47.8396	100001	100000	100003
45.1	55.4576	0	6.10479	7.6582e-08	0.000166081	34.1441	35.2014	30	37.7768	47.8396	100001	100000	100003
45.15	55.4576	0	6.10479	7.44416e-08	0.000163565	34.1441	35.2014	30	37.7768	47.8396	100001	100000	100003
45.2	55.4576	0	6.10479	7.2361e-08	0.000161088	34.1441	35.2014	30	37.7768	47.8396	100001	100000	100003
45.25	55.4576	0	6.10479	7.03386e-08	0.000158648	34.1441	35.2014	30	37.7768	47.8396	100001	100000	100003
45.3	55.4576	0	6.10479	6.83727e-08	0.000156246	34.1441	35.2014	30	37.7768	47.8396	100001	100000	100003
45.35	55.4576	0	6.10479	6.64617e-08	0.000153879	34.1441	35.2014	30	37.7768	47.8396	100001	100000	100003
45.4	55.4576	0	6.10479	6.46041e-08	0.000151549	34.1441	35.2014	30	37.7768	47.8396	100001	100000	100003
45.45	55.4576	0	6.10479	6.27985e-08	0.000149254	34.1441	35.2014	30	37.7768	47.8396	100001	100000	100003
45.5	55.4576	0	6.10479	6.10433e-08	0.000146993	34.1441	35.2014	30	37.7768	47.8396	100001	100000	100003
45.55	55.4576	0	6.10479	5.93372e-08	0.000144767	34.1441	35.2014	30	37.7768	47.8396	100001	100000	100003
45.6	55.4576	0	6.10479	5.76787e-08	0.000142575	34.1441	35.2014	30	37.7768	47.8396	100001	100000	100003
45.65	55.4576	0	6.10479	5.60666e-08	0.000140415	34.1441	35.2014	30	37.7768	47.8396	100001	100000	100003
45.7	55.4576	0	6.10479	5.44995e-08	0.000138289	34.1441	35.2014	30	37.7768	47.8396	100001	100000	100003
45.75	55.4576	0	6.10479	5.29763e-08	0.000136194	34.1441	35.2014	30	37.7768	47.8396	100001	100000	100003
45.8	55.4576	0	6.10479	5.14956e-08	0.000134132	34.1441	35.2014	30	37.7768	47.8396	100001	100000	100003
45.85	55.4576	0	6.1048	5.00563e-08	0.0001321	34.1441	35.2014	30	37.7768	47.8396	100001	100000	100003
45.9	55.4576	0	6.1048	4.86573e-08	0.0001301	34.1441	35.2014	30	37.7768	47.8396	100001	100000	100003
45.95	55.4576	0	6.1048	4.72973e-08	0.000128129	34.1441	35.2014	30	37.7768	47.8396	100001	100000	100003
46	55.4576	0	6.1048	4.59753e-08	0.000126189	34.1441	35.2014	30	37.7768	47.8396	100001	100000	100003
46.05	55.4576	0	6.1048	4.46903e-08	0.000124277	34.1441	35.2014	30	37.7768	47.8396	100001	100000	100003
46.1	55.4576	0	6.1048	4.34412e-08	0.000122395	34.1441	35.2014	30	37.7768	47.8396	100001	100000	100003
46.15	55.4576	0	6.1048	4.2227e-08	0.000120542	34.1441	35.2014	30	37.7768	47.8396	100001	100000	100003
46.2	55.4576	0	6.1048	4.10468e-08	0.000118716	34.1441	35.2014	30	37.7768	47.8396	100001	100000	100003
46.25	55.4576	0	6.1048	3.98995e-08	0.000116918	34.1441	35.2014	30	37.7768	47.8396	100001	100000	100003
46.3	55.4576	0	6.1048	3.87843e-08	0.000115147	34.1441	35.2014	30	37.7768	47.8396	100001	100000	100003
46.35	55.4576	0	6.1048	3.77003e-08	0.000113403	34.1441	35.2014	30	37.7768	47.8396	100001	100000	100003
46.4	55.4576	0	6.1048	3.66466e-08	0.000111686	34.1441	35.2014	30	37.7768	47.8396	100001	100000	100003
46.45	55.4576	0	6.1048	3.56223e-08	0.000109994	34.1441	35.2014	30	37.7768	47.8396	100001	100000	100003
46.5	55.4576	0	6.1048	3.46267e-08	0.000108328	34.1441	35.2014	30	37.7768	47.8396	100001	100000	100003
46.55	55.4576	0	6.1048	3.36589e-08	0.000106688	34.1441	35.2014	30	37.7768	47.8396	100001	100000	100003
46.6	55.4576	0	6.1048	3.27181e-08	0.000105072	34.1441	35.2014	30	37.7768	47.8396	100001	100000	100003
46.65	55.4576	0	6.1048	3.18036e-08	0.000103481	34.1441	35.2014	30	37.7768	47.8396	100001	100000	100003
46.7	55.4576	0	6.1048	3.09147e-08	0.000101913	34.1441	35.2014	30	37.7768	47.8396	100001	100000	100003
46.75	55.4576	0	6.1048	3.00507e-08	0.00010037	34.1441	35.2014	30	37.7768	47.8396	100001	100000	100003
46.8	55.4576	0	6.1048	2.92108e-08	9.88497e-05	34.1441	35.2014	30	37.7768	47.8396	100001	100000	100003
46.85	55.4576	0	6.1048	2.83944e-08	9.73526e-05	34.1441	35.2014	30	37.7768	47.8396	100001	100000	100003
46.9	55.4576	0	6.1048	2.76007e-08	9.58782e-05	34.1441	35.2014	30	37.7768	47.8396	100001	100000	100003
46.95	55.4576	0	6.1048	2.68293e-08	9.44261e-05	34.1441	35.2014	30	37.7768	47.8396	100001	100000	100003
47	55.4576	0	6.1048	2.60794e-08	9.2996e-05	34.1441	35.2014	30	37.7768	47.8396	100001	100000	100003
47.05	55.4576	0	6.1048	2.53505e-08	9.15875e-05	34.1441	35.2014	30	37.7768	47.8396	100001	100000	100003
47.1	55.4576	0	6.1048	2.4642e-08	9.02004e-05	34.1441	35.2014	30	37.7768	47.8396	100001	100000	100003
47.15	55.4576	0	6.1048	2.39533e-08	8.88343e-05	34.1441	35.2014	30	37.7768	47.8396	100001	100000	100003
47.2	55.4576	0	6.1048	2.32838e-08	8.74888e-05	34.1441	35.2014	30	37.7768	47.8396	100001	100000	100003
47.25	55.4576	0	6.1048	2.2633e-08	8.61638e-05	34.1441	35.2014	30	37.7768	47.8396	100001	100000	100003
47.3	55.4576	0	6.1048	2.20004e-08	8.48588e-05	34.1441	35.2014	30	37.7768	47.8396	100001	100000	100003
47.35	55.4576	0	6.1048	2.13855e-08	8.35736e-05	34.1441	35.2014	30	37.7768	47.8396	100001	100000	100003
47.4	55.4576	0	6.1048	2.07878e-08	8.23078e-05	34.1441	35.2014	30	37.7768	47.8396	100001	100000	100003
47.45	55.4576	0	6.10481	2.02068e-08	8.10613e-05	34.1441	35.2014	30	37.7769	47.8396	100001	100000	100003
47.5	55.4576	0	6.10481	1.9642e-08	7.98335e-05	34.1441	35.2014	30	37.7769	47.8396	100001	100000	100003
47.55	55.4576	0	6.10481	1.9093e-08	7.86244e-05	34.1441	35.2014	30	37.7769	47.8396	100001	100000	100003
47.6	55.4576	0	6.10481	1.85594e-08	7.74336e-05	34.1441	35.2014	30	37.7769	47.8396	100001	100000	100003
47.65	55.4576	0	6.10481	1.80406e-08	7.62609e-05	34.1441	35.2014	30	37.7769	47.8396	100001	100000	100003
47.7	55.4576	0	6.10481	1.75364e-08	7.51059e-05	34.1441	35.2014	30	37.7769	47.8396	100001	100000	100003
47.75	55.4576	0	6.10481	1.70463e-08	7.39684e-05	34.1441	35.2014	30	37.7769	47.8396	100001	100000	100003
47.8	55.4576	0	6.10481	1.65698e-08	7.28481e-05	34.1441	35.2014	30	37.7769	47.8396	100001	100000	100003
47.85	55.4576	0	6.10481	1.61067e-08	7.17448e-05	34.1441	35.2014	30	37.7769	47.8396	100001	100000	100003
47.9	55.4576	0	6.10481	1.56565e-08	7.06581e-05	34.1441	35.2014	30	37.7769	47.8396	100001	100000	100003
47.95	55.4576	0	6.10481	1.52189e-08	6.9588e-05	34.1441	35.2014	30	37.7769	47.8396	100001	100000	100003
48	55.4576	0	6.10481	1.47935e-08	6.85341e-05	34.1441	35.2014	30	37.7769	47.8396	100001	100000	100003
48.05	55.4576	0	6.10481	1.43801e-08	6.74961e-05	34.1441	35.2014	30	37.7769	47.8396	100001	100000	100003

## Sheet: RI_FP8
Time	RI	FP	BH	fructose	formate	acetate	butyrate	unknown compound	H20	CO2	lag_RI	lag_FP	lag_BH
0.05	1.19507	0.0707242	0	48.9071	0.000143183	48.5034	2.15016	30	0.00865393	0.0402791	0.103873	1.12733e-05	0.110517
0.1	1.19729	0.0707242	0	48.9059	0.000291653	48.5028	2.15155	30	0.00998304	0.0420513	0.107896	1.27088e-05	0.122141
0.15	1.19959	0.0707243	0	48.9045	0.000445594	48.5022	2.15298	30	0.0113611	0.0438888	0.112075	1.43269e-05	0.134986
0.2	1.20197	0.0707243	0	48.9032	0.0006052	48.5015	2.15447	30	0.0127898	0.0457938	0.116416	1.61512e-05	0.149183
0.25	1.20444	0.0707243	0	48.9018	0.000770667	48.5008	2.15602	30	0.014271	0.0477687	0.120925	1.82077e-05	0.164873
0.3	1.20699	0.0707244	0	48.9003	0.000942201	48.5001	2.15762	30	0.0158063	0.049816	0.125609	2.05261e-05	0.182213
0.35	1.20965	0.0707244	0	48.8988	0.00112001	48.4994	2.15927	30	0.0173978	0.0519381	0.130474	2.31398e-05	0.201377
0.4	1.2124	0.0707245	0	48.8972	0.00130432	48.4986	2.16099	30	0.0190474	0.0541375	0.135527	2.60862e-05	0.222556
0.45	1.21525	0.0707246	0	48.8955	0.00149534	48.4978	2.16277	30	0.020757	0.0564171	0.140776	2.94079e-05	0.245963
0.5	1.2182	0.0707247	0	48.8938	0.00169331	48.497	2.16462	30	0.0225286	0.0587794	0.146228	3.31524e-05	0.271832
0.55	1.22126	0.0707248	0	48.8921	0.00189846	48.4961	2.16653	30	0.0243645	0.0612274	0.151892	3.73738e-05	0.300421
0.6	1.22443	0.0707249	0	48.8902	0.00211105	48.4952	2.16851	30	0.0262667	0.0637639	0.157775	4.21327e-05	0.332017
0.65	1.22771	0.070725	0	48.8883	0.00233132	48.4943	2.17057	30	0.0282375	0.0663918	0.163886	4.74976e-05	0.366937
0.7	1.23112	0.0707251	0	48.8864	0.00255953	48.4934	2.17269	30	0.0302793	0.0691144	0.170233	5.35455e-05	0.405528
0.75	1.23464	0.0707252	0	48.8844	0.00279595	48.4924	2.1749	30	0.0323943	0.0719346	0.176827	6.03636e-05	0.448179
0.8	1.23829	0.0707254	0	48.8823	0.00304085	48.4914	2.17718	30	0.034585	0.0748558	0.183675	6.80499e-05	0.495315
0.85	1.24207	0.0707256	0	48.8801	0.00329453	48.4903	2.17954	30	0.0368539	0.0778813	0.190789	7.67148e-05	0.547409
0.9	1.24599	0.0707258	0	48.8778	0.00355725	48.4892	2.18199	30	0.0392036	0.0810145	0.198179	8.64831e-05	0.604981
0.95	1.25004	0.070726	0	48.8755	0.00382934	48.4881	2.18453	30	0.0416366	0.084259	0.205855	9.74952e-05	0.668609
1	1.25424	0.0707263	0	48.8731	0.00411109	48.4869	2.18715	30	0.0441558	0.0876183	0.213828	0.00010991	0.738928
1.05	1.25859	0.0707266	0	48.8706	0.00440283	48.4857	2.18987	30	0.0467638	0.0910962	0.22211	0.000123905	0.816644
1.1	1.26309	0.0707269	0	48.868	0.00470487	48.4845	2.19268	30	0.0494636	0.0946964	0.230712	0.000139682	0.902532
1.15	1.26775	0.0707273	0	48.8653	0.00501756	48.4832	2.19559	30	0.0522581	0.098423	0.239648	0.000157468	0.997454
1.2	1.27257	0.0707277	0	48.8625	0.00534123	48.4818	2.19861	30	0.0551502	0.10228	0.24893	0.000177518	1.10236
1.25	1.27756	0.0707282	0	48.8596	0.00567624	48.4804	2.20172	30	0.0581431	0.106271	0.258571	0.000200122	1.2183
1.3	1.28272	0.0707288	0	48.8567	0.00602296	48.479	2.20495	30	0.0612398	0.110401	0.268586	0.000225604	1.34643
1.35	1.28806	0.0707294	0	48.8536	0.00638175	48.4775	2.20829	30	0.0644437	0.114674	0.278989	0.000254331	1.48804
1.4	1.29358	0.0707301	0	48.8504	0.006753	48.476	2.21174	30	0.0677579	0.119094	0.289794	0.000286715	1.64454
1.45	1.29929	0.0707308	0	48.8471	0.00713711	48.4744	2.21532	30	0.071186	0.123666	0.301018	0.000323224	1.8175
1.5	1.3052	0.0707317	0	48.8437	0.00753448	48.4727	2.21901	30	0.0747312	0.128394	0.312677	0.00036438	2.00865
1.55	1.31131	0.0707327	0	48.8402	0.00794552	48.471	2.22283	30	0.0783973	0.133284	0.324787	0.000410778	2.21991
1.6	1.31763	0.0707338	0	48.8365	0.00837066	48.4693	2.22678	30	0.0821878	0.13834	0.337367	0.000463083	2.45338
1.65	1.32416	0.0707351	0	48.8328	0.00881035	48.4674	2.23087	30	0.0861064	0.143566	0.350433	0.000522049	2.71141
1.7	1.33091	0.0707365	0	48.8289	0.00926503	48.4655	2.23509	30	0.0901568	0.148969	0.364006	0.000588523	2.99658
1.75	1.33789	0.0707381	0	48.8249	0.00973517	48.4636	2.23946	30	0.094343	0.154553	0.378105	0.000663461	3.31173
1.8	1.3451	0.0707399	0	48.8207	0.0102212	48.4616	2.24397	30	0.0986688	0.160324	0.392749	0.000747941	3.66004
1.85	1.35255	0.0707419	0	48.8164	0.0107237	48.4595	2.24863	30	0.103138	0.166286	0.407961	0.000843178	4.04498
1.9	1.36024	0.0707442	0	48.812	0.0112432	48.4574	2.25344	30	0.107755	0.172446	0.423761	0.000950542	4.4704
1.95	1.36819	0.0707468	0	48.8074	0.0117801	48.4551	2.25841	29.9999	0.112525	0.178809	0.440174	0.00107158	4.94056
2	1.3764	0.0707497	0	48.8027	0.0123349	48.4529	2.26355	29.9999	0.11745	0.185381	0.457223	0.00120802	5.46017
2.05	1.38488	0.0707529	0	48.7978	0.0129084	48.4505	2.26886	29.9999	0.122536	0.192167	0.474932	0.00136184	6.03444
2.1	1.39363	0.0707566	0	48.7927	0.0135009	48.448	2.27433	29.9999	0.127786	0.199174	0.493326	0.00153525	6.6691
2.15	1.40266	0.0707608	0	48.7875	0.0141132	48.4455	2.27999	29.9999	0.133207	0.206408	0.512433	0.00173074	7.3705
2.2	1.41198	0.0707655	0	48.7821	0.0147457	48.4429	2.28583	29.9999	0.138801	0.213874	0.532281	0.00195112	8.14568
2.25	1.42161	0.0707707	0	48.7766	0.0153992	48.4402	2.29185	29.9999	0.144573	0.221579	0.552897	0.00219956	9.00239
2.3	1.43153	0.0707767	0	48.7709	0.0160743	48.4375	2.29807	29.9999	0.150529	0.22953	0.574311	0.00247963	9.94919
2.35	1.44177	0.0707834	0	48.7649	0.0167717	48.4346	2.30449	29.9999	0.156673	0.237733	0.596555	0.00279537	10.9956
2.4	1.45233	0.070791	0	48.7588	0.0174921	48.4316	2.3111	29.9998	0.16301	0.246195	0.61966	0.00315131	12.152
2.45	1.46323	0.0707995	0	48.7526	0.0182362	48.4286	2.31793	29.9998	0.169545	0.254922	0.64366	0.00355257	13.4301
2.5	1.47446	0.0708091	0	48.7461	0.0190047	48.4255	2.32497	29.9998	0.176283	0.263921	0.66859	0.00400493	14.8426
2.55	1.48603	0.0708199	0	48.7394	0.0197986	48.4222	2.33223	29.9998	0.183229	0.2732	0.694485	0.00451489	16.4036
2.6	1.49796	0.0708321	0	48.7325	0.0206186	48.4189	2.33972	29.9997	0.190389	0.282765	0.721384	0.00508978	18.1288
2.65	1.51026	0.0708458	0	48.7254	0.0214656	48.4154	2.34743	29.9997	0.197766	0.292624	0.749324	0.00573788	20.0355
2.7	1.52293	0.0708613	0	48.7181	0.0223405	48.4119	2.35539	29.9997	0.205368	0.302784	0.778346	0.00646849	22.1426
2.75	1.53598	0.0708787	0	48.7105	0.0232442	48.4082	2.36358	29.9996	0.213199	0.313253	0.808492	0.00729214	24.4714
2.8	1.54942	0.0708984	0	48.7027	0.024178	48.4045	2.37203	29.9996	0.221264	0.324038	0.839806	0.00822067	27.0452
2.85	1.56327	0.0709205	0	48.6947	0.0251427	48.4006	2.38073	29.9995	0.229569	0.335147	0.872333	0.00926743	29.8896
2.9	1.57752	0.0709454	0	48.6865	0.0261396	48.3966	2.38969	29.9995	0.238121	0.346589	0.906119	0.0104475	33.0332
2.95	1.59219	0.0709735	0	48.678	0.0271698	48.3925	2.39893	29.9994	0.246923	0.358371	0.941215	0.0117778	36.5074
3	1.60729	0.0710052	0	48.6692	0.0282347	48.3882	2.40844	29.9993	0.255983	0.370501	0.977669	0.0132775	40.3469
3.05	1.62283	0.0710408	0	48.6602	0.0293358	48.3838	2.41823	29.9992	0.265306	0.382988	1.01554	0.0149681	44.5904
3.1	1.63881	0.0710809	0	48.6509	0.0304744	48.3793	2.42831	29.9991	0.274898	0.395842	1.05487	0.016874	49.28
3.15	1.65526	0.071126	0	48.6414	0.0316521	48.3747	2.43869	29.999	0.284764	0.409069	1.09572	0.0190227	54.463
3.2	1.67217	0.0711768	0	48.6316	0.0328708	48.3699	2.44937	29.9989	0.294912	0.42268	1.13816	0.0214449	60.191
3.25	1.68956	0.0712339	0	48.6214	0.0341322	48.365	2.46037	29.9987	0.305346	0.436684	1.18225	0.0241755	66.5215
3.3	1.70744	0.0712983	0	48.611	0.0354384	48.3599	2.47169	29.9986	0.316073	0.45109	1.22804	0.0272538	73.5177
3.35	1.72582	0.0713706	0	48.6003	0.0367915	48.3547	2.48334	29.9984	0.3271	0.465908	1.2756	0.0307241	81.2498
3.4	1.7447	0.0714519	0	48.5893	0.0381939	48.3494	2.49533	29.9982	0.338432	0.481148	1.325	0.0346363	89.795
3.45	1.76411	0.0715434	0	48.578	0.0396482	48.3438	2.50767	29.998	0.350077	0.49682	1.37632	0.0390466	99.239
3.5	1.78405	0.0716461	0	48.5663	0.041157	48.3382	2.52036	29.9977	0.362039	0.512934	1.42963	0.0440185	109.676
3.55	1.80453	0.0717615	0	48.5543	0.0427235	48.3323	2.53342	29.9974	0.374327	0.529502	1.485	0.0496235	121.211
3.6	1.82556	0.0718911	0	48.542	0.0443508	48.3263	2.54686	29.9971	0.386945	0.546535	1.54252	0.0559421	133.959
3.65	1.84715	0.0720365	0	48.5293	0.0460425	48.3201	2.56069	29.9967	0.399902	0.564043	1.60226	0.0630654	148.048
3.7	1.86932	0.0721996	0	48.5162	0.0478025	48.3137	2.57491	29.9963	0.413204	0.58204	1.66432	0.0710956	163.619
3.75	1.89208	0.0723824	0	48.5028	0.049635	48.3071	2.58955	29.9959	0.426857	0.600537	1.72878	0.0801484	180.827
3.8	1.91543	0.0725873	0	48.489	0.0515446	48.3004	2.60461	29.9954	0.440869	0.619546	1.79574	0.0903539	199.845
3.85	1.93939	0.0728166	0	48.4748	0.0535361	48.2934	2.6201	29.9948	0.455246	0.639082	1.86529	0.101859	220.864
3.9	1.96397	0.073073	0	48.4602	0.055615	48.2862	2.63605	29.9942	0.469995	0.659158	1.93753	0.114829	244.092
3.95	1.98919	0.0733596	0	48.4452	0.057787	48.2789	2.65245	29.9935	0.485123	0.679788	2.01258	0.12945	269.764
4	2.01505	0.0736796	0	48.4297	0.0600584	48.2713	2.66934	29.9927	0.500638	0.700987	2.09053	0.145933	298.136
4.05	2.04156	0.0740365	0	48.4138	0.0624358	48.2634	2.68672	29.9918	0.516547	0.722769	2.1715	0.164516	329.492
4.1	2.06874	0.074434	0	48.3975	0.0649264	48.2553	2.70461	29.9908	0.532857	0.745152	2.2556	0.185464	364.146
4.15	2.09661	0.0748762	0	48.3806	0.067538	48.247	2.72302	29.9897	0.549575	0.76815	2.34296	0.209079	402.444
4.2	2.12516	0.0753675	0	48.3633	0.0702787	48.2384	2.74198	29.9885	0.566709	0.791781	2.43371	0.235702	444.77
4.25	2.15443	0.0759125	0	48.3455	0.073157	48.2296	2.76151	29.9871	0.584266	0.816063	2.52797	0.265714	491.548
4.3	2.18441	0.0765161	0	48.3272	0.0761822	48.2205	2.78161	29.9856	0.602255	0.841014	2.62588	0.299548	543.245
4.35	2.21512	0.0771834	0	48.3084	0.0793636	48.2111	2.80232	29.9839	0.620682	0.866651	2.72758	0.33769	600.38
4.4	2.24658	0.0779198	0	48.289	0.0827113	48.2014	2.82364	29.9821	0.639556	0.892994	2.83323	0.380689	663.524
4.45	2.27879	0.0787309	0	48.269	0.0862355	48.1914	2.84561	29.9801	0.658884	0.920063	2.94296	0.429164	733.308
4.5	2.31177	0.0796224	0	48.2485	0.0899467	48.181	2.86825	29.9779	0.678674	0.947877	3.05695	0.48381	810.432
4.55	2.34554	0.0806001	0	48.2273	0.0938556	48.1704	2.89157	29.9755	0.698936	0.976456	3.17535	0.545415	895.668
4.6	2.38011	0.0816699	0	48.2055	0.0979732	48.1594	2.91559	29.9728	0.719675	1.00582	3.29833	0.614864	989.868
4.65	2.41549	0.0828378	0	48.1831	0.10231	48.148	2.94035	29.9699	0.740902	1.03599	3.42608	0.693156	1093.98
4.7	2.45169	0.0841098	0	48.1601	0.106878	48.1363	2.96586	29.9667	0.762624	1.06699	3.55877	0.781417	1209.03
4.75	2.48873	0.0854915	0	48.1363	0.111687	48.1242	2.99214	29.9633	0.78485	1.09884	3.69661	0.880916	1336.19
4.8	2.52663	0.0869889	0	48.1119	0.116747	48.1118	3.01921	29.9596	0.807588	1.13155	3.83979	0.993086	1476.72
4.85	2.5654	0.0886075	0	48.0867	0.12207	48.0989	3.0471	29.9556	0.830847	1.16515	3.9885	1.11954	1632.03
4.9	2.60504	0.0903527	0	48.0609	0.127666	48.0856	3.07583	29.9512	0.854636	1.19966	4.14298	1.26209	1803.68
4.95	2.64559	0.0922296	0	48.0343	0.133543	48.0719	3.10543	29.9466	0.878964	1.2351	4.30345	1.4228	1993.37
5	2.68705	0.0942432	0	48.0069	0.139711	48.0578	3.1359	29.9416	0.903839	1.27149	4.47013	1.60396	2203.02
5.05	2.72943	0.0963983	0	47.9787	0.14618	48.0433	3.16727	29.9362	0.92927	1.30885	4.64326	1.8082	2434.72
5.1	2.77276	0.0986993	0	47.9497	0.152958	48.0283	3.19956	29.9305	0.955268	1.34719	4.8231	2.03844	2690.79
5.15	2.81705	0.101151	0	47.92	0.160054	48.0128	3.23279	29.9244	0.981841	1.38654	5.0099	2.298	2973.78
5.2	2.86232	0.103756	0	47.8894	0.167474	47.9969	3.26697	29.9179	1.009	1.42692	5.20394	2.59061	3286.55
5.25	2.90857	0.10652	0	47.8579	0.175227	47.9804	3.30214	29.911	1.03675	1.46835	5.4055	2.92048	3632.2
5.3	2.95583	0.109446	0	47.8256	0.183321	47.9635	3.3383	29.9038	1.06511	1.51084	5.61486	3.29235	4014.21
5.35	3.00411	0.112537	0	47.7924	0.191762	47.9461	3.37548	29.8961	1.09408	1.55441	5.83233	3.71158	4436.4
5.4	3.05343	0.115798	0	47.7583	0.200558	47.9282	3.41369	29.888	1.12367	1.59909	6.05822	4.18418	4902.98
5.45	3.10381	0.119232	0	47.7233	0.209715	47.9098	3.45295	29.8795	1.1539	1.64488	6.29287	4.71696	5418.65
5.5	3.15527	0.122842	0	47.6874	0.219242	47.8909	3.49328	29.8705	1.18477	1.69182	6.5366	5.31759	5988.54
5.55	3.20781	0.126633	0	47.6506	0.229146	47.8714	3.5347	29.8611	1.21629	1.73992	6.78977	5.99469	6618.37
5.6	3.26146	0.130607	0	47.6128	0.239434	47.8514	3.57723	29.8512	1.24848	1.7892	7.05274	6.75801	7314.44
5.65	3.31623	0.13477	0	47.574	0.250114	47.8308	3.62089	29.8408	1.28135	1.83968	7.3259	7.61852	8083.73
5.7	3.37215	0.139124	0	47.5342	0.261193	47.8097	3.6657	29.83	1.3149	1.89138	7.60965	8.58861	8933.91
5.75	3.42923	0.143675	0	47.4934	0.272681	47.788	3.71167	29.8187	1.34915	1.94433	7.90438	9.68221	9873.52
5.8	3.4875	0.148426	0	47.4516	0.284585	47.7657	3.75884	29.8069	1.38411	1.99854	8.21052	10.9151	10911.9
5.85	3.54695	0.153382	0	47.4087	0.296916	47.7429	3.80723	29.7946	1.41978	2.05404	8.52853	12.3049	12059.6
5.9	3.60763	0.158549	0	47.3647	0.309681	47.7194	3.85685	29.7818	1.45619	2.11084	8.85885	13.8717	13327.9
5.95	3.66954	0.163931	0	47.3197	0.322892	47.6953	3.90773	29.7684	1.49334	2.16898	9.20196	15.6381	14729.7
6	3.73271	0.169533	0	47.2736	0.336559	47.6706	3.95989	29.7545	1.53124	2.22848	9.55837	17.6293	16278.8
6.05	3.79715	0.175362	0	47.2263	0.350692	47.6453	4.01336	29.74	1.5699	2.28936	9.92857	19.8741	17990.9
6.1	3.86289	0.181423	0	47.1779	0.365304	47.6192	4.06817	29.7249	1.60934	2.35165	10.3131	22.4047	19883.1
6.15	3.92994	0.187723	0	47.1283	0.380405	47.5926	4.12434	29.7093	1.64957	2.41537	10.7126	25.2575	21974.2
6.2	3.99833	0.194267	0	47.0776	0.396008	47.5652	4.1819	29.693	1.69061	2.48055	11.1275	28.4736	24285.3
6.25	4.06807	0.201064	0	47.0256	0.412126	47.5372	4.24087	29.6761	1.73245	2.54722	11.5585	32.0992	26839.5
6.3	4.13918	0.20812	0	46.9723	0.428773	47.5084	4.3013	29.6586	1.77512	2.6154	12.0061	36.1865	29662.3
6.35	4.21169	0.215443	0	46.9178	0.445963	47.479	4.36319	29.6404	1.81863	2.68512	12.4711	40.7942	32781.9
6.4	4.28562	0.22304	0	46.862	0.463709	47.4488	4.4266	29.6215	1.86298	2.75642	12.9542	45.9887	36229.7
6.45	4.36099	0.23092	0	46.8049	0.482029	47.4178	4.49154	29.6019	1.9082	2.82932	13.4559	51.8445	40040.1
6.5	4.43781	0.239091	0	46.7464	0.500936	47.3861	4.55806	29.5816	1.9543	2.90386	13.9771	58.446	44251.2
6.55	4.51612	0.247562	0	46.6866	0.520448	47.3536	4.62618	29.5606	2.00128	2.98006	14.5184	65.888	48905.2
6.6	4.59593	0.256342	0	46.6253	0.540581	47.3203	4.69594	29.5387	2.04917	3.05796	15.0807	74.2777	54048.7
6.65	4.67727	0.265441	0	46.5626	0.561353	47.2861	4.76738	29.5161	2.09797	3.13758	15.6648	83.7357	59733.2
6.7	4.76015	0.274868	0	46.4985	0.582782	47.2512	4.84052	29.4927	2.1477	3.21897	16.2715	94.398	66015.5
6.75	4.84461	0.284635	0	46.4328	0.604887	47.2153	4.91542	29.4684	2.19838	3.30216	16.9017	106.418	72958.6
6.8	4.93066	0.29475	0	46.3656	0.627687	47.1786	4.9921	29.4433	2.25	3.38719	17.5564	119.968	80631.8
6.85	5.01832	0.305226	0	46.2969	0.651202	47.141	5.0706	29.4173	2.3026	3.47408	18.2364	135.244	89112.1
6.9	5.10762	0.316074	0	46.2266	0.675452	47.1025	5.15098	29.3903	2.35618	3.56287	18.9427	152.465	98484.1
6.95	5.19858	0.327305	0	46.1546	0.70046	47.0631	5.23325	29.3624	2.41076	3.65361	19.6764	171.879	100000
7	5.29122	0.338931	0	46.081	0.726245	47.0227	5.31748	29.3335	2.46634	3.74633	20.4384	193.764	100000
7.05	5.38558	0.350965	0	46.0057	0.752832	46.9813	5.40369	29.3036	2.52296	3.84107	21.23	218.437	100000
7.1	5.48166	0.363419	0	45.9287	0.780243	46.9389	5.49194	29.2727	2.58061	3.93786	22.0523	246.251	100000
7.15	5.5795	0.376307	0	45.8499	0.808502	46.8955	5.58227	29.2406	2.63931	4.03675	22.9064	277.607	100000
7.2	5.67912	0.389643	0	45.7693	0.837633	46.8511	5.67472	29.2075	2.69908	4.13778	23.7936	312.955	100000
7.25	5.78054	0.403439	0	45.6869	0.867662	46.8056	5.76935	29.1732	2.75993	4.241	24.7152	352.803	100000
7.3	5.88379	0.417712	0	45.6025	0.898614	46.759	5.86619	29.1377	2.82188	4.34643	25.6724	397.725	100000
7.35	5.98888	0.432474	0	45.5163	0.930516	46.7113	5.9653	29.1011	2.88494	4.45413	26.6668	448.367	100000
7.4	6.09586	0.447743	0	45.4281	0.963394	46.6624	6.06672	29.0631	2.94912	4.56413	27.6996	505.457	100000
7.45	6.20473	0.463532	0	45.3378	0.997278	46.6124	6.17051	29.0239	3.01445	4.67649	28.7724	569.817	100000
7.5	6.31552	0.479859	0	45.2456	1.0322	46.5612	6.27672	28.9833	3.08092	4.79125	29.8868	642.372	100000
7.55	6.42826	0.496739	0	45.1512	1.06817	46.5088	6.3854	28.9414	3.14856	4.90845	31.0444	724.166	100000
7.6	6.54297	0.514189	0	45.0548	1.10525	46.4552	6.4966	28.898	3.21739	5.02814	32.2468	816.373	100000
7.65	6.65967	0.532227	0	44.9561	1.14344	46.4002	6.61038	28.8532	3.28741	5.15036	33.4957	920.32	100000
7.7	6.7784	0.55087	0	44.8552	1.18279	46.344	6.72679	28.8068	3.35865	5.27517	34.7931	1037.5	100000
7.75	6.89916	0.570136	0	44.7521	1.22333	46.2865	6.84589	28.759	3.43111	5.40261	36.1406	1169.61	100000
7.8	7.02199	0.590044	0	44.6467	1.26508	46.2276	6.96773	28.7095	3.50481	5.53273	37.5404	1318.53	100000
7.85	7.14691	0.610613	0	44.5389	1.30809	46.1674	7.09237	28.6584	3.57976	5.66557	38.9944	1486.42	100000
7.9	7.27395	0.631861	0	44.4287	1.35238	46.1057	7.21987	28.6056	3.65598	5.8012	40.5047	1675.68	100000
7.95	7.40312	0.653808	0	44.316	1.398	46.0426	7.3503	28.551	3.73348	5.93965	42.0735	1889.04	100000
8	7.53445	0.676475	0	44.2008	1.44497	45.9781	7.4837	28.4947	3.81228	6.08098	43.703	2129.56	100000
8.05	7.66797	0.699882	0	44.0831	1.49333	45.912	7.62014	28.4365	3.89239	6.22525	45.3957	2400.72	100000
8.1	7.80369	0.72405	0	43.9628	1.54312	45.8444	7.75968	28.3765	3.97382	6.37249	47.154	2706.4	100000
8.15	7.94163	0.748999	0	43.8399	1.59438	45.7753	7.90238	28.3145	4.05659	6.52277	48.9803	3051	100000
8.2	8.08183	0.774752	0	43.7142	1.64714	45.7046	8.0483	28.2505	4.14071	6.67613	50.8773	3439.47	100000
8.25	8.2243	0.80133	0	43.5858	1.70144	45.6323	8.19752	28.1844	4.22619	6.83263	52.8479	3877.41	100000
8.3	8.36906	0.828755	0	43.4546	1.75732	45.5583	8.35009	28.1163	4.31304	6.99232	54.8948	4371.12	100000
8.35	8.51613	0.857051	0	43.3205	1.81483	45.4827	8.50607	28.046	4.40129	7.15525	57.0209	4927.68	100000
8.4	8.66554	0.886239	0	43.1835	1.87399	45.4054	8.66553	27.9734	4.49093	7.32147	59.2294	5555.11	100000
8.45	8.8173	0.916344	0	43.0436	1.93486	45.3263	8.82854	27.8986	4.58199	7.49105	61.5234	6262.44	100000
8.5	8.97143	0.947388	0	42.9007	1.99746	45.2455	8.99515	27.8215	4.67447	7.66403	63.9063	7059.82	100000
8.55	9.12796	0.979395	0	42.7547	2.06185	45.1629	9.16545	27.742	4.76838	7.84046	66.3815	7958.73	100000
8.6	9.28689	1.01239	0	42.6055	2.12806	45.0784	9.33948	27.66	4.86374	8.0204	68.9525	8972.1	100000
8.65	9.44825	1.04639	0	42.4533	2.19613	44.9921	9.51731	27.5755	4.96056	8.20389	71.6231	10114.5	100000
8.7	9.61206	1.08143	0	42.2977	2.26611	44.904	9.69902	27.4884	5.05884	8.391	74.3972	11402.4	100000
8.75	9.77832	1.11753	0	42.139	2.33804	44.8139	9.88466	27.3987	5.1586	8.58177	77.2787	12854.2	100000
8.8	9.94706	1.15471	0	41.9769	2.41197	44.7218	10.0743	27.3063	5.25984	8.77625	80.2718	14490.9	100000
8.85	10.1183	1.19301	0	41.8114	2.48792	44.6278	10.268	27.2111	5.36258	8.9745	83.3808	16336	100000
8.9	10.292	1.23243	0	41.6425	2.56595	44.5318	10.4658	27.1132	5.46682	9.17656	86.6102	18416	100000
8.95	10.4683	1.27301	0	41.4701	2.64609	44.4338	10.6679	27.0123	5.57256	9.38248	89.9647	20760.9	100000
9	10.647	1.31477	0	41.2942	2.7284	44.3337	10.8742	26.9085	5.67982	9.59231	93.4492	23404.3	100000
9.05	10.8283	1.35774	0	41.1147	2.8129	44.2316	11.0847	26.8018	5.7886	9.8061	97.0686	26384.4	100000
9.1	11.0122	1.40193	0	40.9316	2.89964	44.1273	11.2997	26.6919	5.89891	10.0239	100.828	29743.8	100000
9.15	11.1986	1.44738	0	40.7448	2.98867	44.0209	11.5191	26.579	6.01075	10.2457	104.733	33531	100000
9.2	11.3875	1.49411	0	40.5544	3.08002	43.9124	11.743	26.4629	6.12412	10.4717	108.79	37800.5	100000
9.25	11.579	1.54213	0	40.3601	3.17372	43.8017	11.9714	26.3436	6.23903	10.7017	113.003	42613.5	100000
9.3	11.7731	1.59148	0	40.1621	3.26982	43.6887	12.2044	26.2209	6.35549	10.9359	117.38	48039.4	100000
9.35	11.9698	1.64217	0	39.9602	3.36836	43.5736	12.4421	26.095	6.47348	11.1744	121.926	54156.2	100000
9.4	12.169	1.69423	0	39.7544	3.46937	43.4563	12.6845	25.9656	6.59302	11.417	126.649	61051.8	100000
9.45	12.3708	1.74767	0	39.5447	3.57289	43.3367	12.9316	25.8328	6.7141	11.664	131.554	68825.4	100000
9.5	12.5752	1.80252	0	39.3311	3.67895	43.2148	13.1835	25.6965	6.83672	11.9152	136.649	77588.8	100000
9.55	12.7821	1.85879	0	39.1135	3.78758	43.0906	13.4402	25.5567	6.96088	12.1708	141.942	87468	100000
9.6	12.9916	1.91651	0	38.8918	3.89881	42.9642	13.7019	25.4132	7.08658	12.4308	147.439	98605.1	100000
9.65	13.2037	1.97569	0	38.6662	4.01268	42.8355	13.9684	25.2662	7.2138	12.6951	153.151	100002	100000
9.7	13.4182	2.03634	0	38.4364	4.1292	42.7045	14.2398	25.1154	7.34255	12.9638	159.083	100002	100000
9.75	13.6354	2.09849	0	38.2026	4.2484	42.5711	14.5162	24.961	7.47282	13.2369	165.244	100002	100000
9.8	13.855	2.16214	0	37.9647	4.37031	42.4355	14.7976	24.8028	7.6046	13.5145	171.644	100002	100000
9.85	14.0771	2.22731	0	37.7226	4.49494	42.2975	15.084	24.6409	7.73788	13.7965	178.292	100002	100000
9.9	14.3017	2.29401	0	37.4764	4.6223	42.1572	15.3754	24.4751	7.87265	14.0829	185.198	100002	100000
9.95	14.5288	2.36225	0	37.2261	4.75243	42.0147	15.6718	24.3056	8.00891	14.3737	192.371	100002	100000
10	14.7584	2.43203	0	36.9717	4.88531	41.8698	15.9732	24.1322	8.14662	14.669	199.822	100002	100000
10.05	14.9903	2.50336	0	36.7131	5.02098	41.7227	16.2797	23.9549	8.28579	14.9687	207.562	100002	100000
10.1	15.2246	2.57624	0	36.4504	5.15942	41.5733	16.5911	23.7738	8.4264	15.2728	215.601	100002	100000
10.15	15.4614	2.65068	0	36.1836	5.30064	41.4217	16.9076	23.5888	8.56842	15.5812	223.951	100002	100000
10.2	15.7004	2.72668	0	35.9127	5.44463	41.2678	17.2291	23.3999	8.71185	15.8941	232.625	100002	100000
10.25	15.9417	2.80423	0	35.6377	5.5914	41.1118	17.5555	23.2072	8.85666	16.2112	241.635	100002	100000
10.3	16.1854	2.88333	0	35.3586	5.74092	40.9535	17.8868	23.0107	9.00283	16.5327	250.994	100002	100000
10.35	16.4312	2.96397	0	35.0756	5.89319	40.7932	18.223	22.8103	9.15033	16.8584	260.716	100002	100000
10.4	16.6792	3.04613	0	34.7885	6.04817	40.6307	18.5641	22.6061	9.29915	17.1883	270.814	100002	100000
10.45	16.9294	3.12982	0	34.4976	6.20586	40.4662	18.9099	22.3981	9.44925	17.5223	281.303	100002	100000
10.5	17.1817	3.21501	0	34.2028	6.36622	40.2997	19.2604	22.1865	9.60062	17.8604	292.198	100002	100000
10.55	17.436	3.30167	0	33.9041	6.52921	40.1312	19.6156	21.9711	9.75321	18.2025	303.516	100002	100000
10.6	17.6923	3.38981	0	33.6017	6.69479	39.9608	19.9754	21.7521	9.90701	18.5486	315.272	100002	100000
10.65	17.9506	3.47938	0	33.2956	6.86294	39.7885	20.3396	21.5295	10.062	18.8986	327.484	100002	100000
10.7	18.2108	3.57037	0	32.9859	7.03359	39.6145	20.7082	21.3034	10.2181	19.2523	340.168	100002	100000
10.75	18.4728	3.66274	0	32.6727	7.2067	39.4387	21.081	21.0739	10.3753	19.6097	353.343	100002	100000
10.8	18.7366	3.75646	0	32.356	7.38219	39.2612	21.4581	20.841	10.5335	19.9706	367.029	100002	100000
10.85	19.002	3.85149	0	32.036	7.56002	39.0822	21.8392	20.6048	10.6928	20.3351	381.244	100002	100000
10.9	19.2692	3.9478	0	31.7128	7.7401	38.9016	22.2242	20.3655	10.8531	20.7029	396.01	100002	100000
10.95	19.5379	4.04534	0	31.3864	7.92236	38.7196	22.613	20.1231	11.0143	21.0739	411.348	100002	100000
11	19.8081	4.14407	0	31.0571	8.10673	38.5363	23.0054	19.8777	11.1765	21.4481	427.28	100002	100000
11.05	20.0798	4.24394	0	30.7249	8.29311	38.3517	23.4013	19.6296	11.3395	21.8252	443.83	100002	100000
11.1	20.3528	4.34489	0	30.3899	8.48141	38.1659	23.8005	19.3787	11.5033	22.2051	461.02	100002	100000
11.15	20.6271	4.44689	0	30.0523	8.67155	37.9791	24.2028	19.1252	11.6679	22.5878	478.876	100002	100000
11.2	20.9026	4.54985	0	29.7123	8.8634	37.7913	24.6081	18.8694	11.8332	22.9729	497.424	100002	100000
11.25	21.1793	4.65374	0	29.3699	9.05688	37.6026	25.0162	18.6112	11.9992	23.3605	516.69	100002	100000
11.3	21.457	4.75848	0	29.0254	9.25187	37.4131	25.4269	18.3509	12.1658	23.7502	536.702	100002	100000
11.35	21.7356	4.86401	0	28.6788	9.44826	37.223	25.84	18.0887	12.333	24.142	557.489	100002	100000
11.4	22.0152	4.97027	0	28.3305	9.64592	37.0323	26.2553	17.8246	12.5007	24.5356	579.082	100002	100000
11.45	22.2955	5.07717	0	27.9805	9.84473	36.8412	26.6725	17.559	12.6689	24.931	601.511	100002	100000
11.5	22.5766	5.18466	0	27.629	10.0446	36.6497	27.0916	17.2919	12.8376	25.3278	624.808	100002	100000
11.55	22.8583	5.29265	0	27.2762	10.2453	36.458	27.5121	17.0235	13.0066	25.7259	649.008	100002	100000
11.6	23.1405	5.40108	0	26.9223	10.4468	36.2662	27.9339	16.7541	13.1759	26.1251	674.145	100002	100000
11.65	23.4231	5.50986	0	26.5674	10.6489	36.0744	28.3569	16.4838	13.3455	26.5253	700.256	100002	100000
11.7	23.7061	5.61891	0	26.2118	10.8515	35.8828	28.7806	16.2128	13.5153	26.9262	727.378	100002	100000
11.75	23.9893	5.72816	0	25.8557	11.0545	35.6913	29.205	15.9413	13.6852	27.3276	755.551	100002	100000
11.8	24.2727	5.83753	0	25.4992	11.2576	35.5003	29.6297	15.6695	13.8552	27.7293	784.814	100002	100000
11.85	24.5562	5.94693	0	25.1425	11.4609	35.3097	30.0546	15.3976	14.0253	28.1311	815.212	100002	100000
11.9	24.8397	6.05629	0	24.7859	11.664	35.1197	30.4793	15.1259	14.1954	28.5328	846.786	100002	100000
11.95	25.123	6.16551	0	24.4295	11.8669	34.9304	30.9037	14.8544	14.3654	28.9343	879.583	100002	100000
12	25.4061	6.27453	0	24.0736	12.0695	34.7419	31.3275	14.5835	14.5353	29.3352	913.651	100002	100000
12.05	25.689	6.38326	0	23.7182	12.2715	34.5544	31.7504	14.3134	14.705	29.7355	949.038	100002	100000
12.1	25.9715	6.49162	0	23.3637	12.4729	34.3679	32.1723	14.0441	14.8745	30.1348	985.796	100002	100000
12.15	26.2534	6.59952	0	23.0103	12.6736	34.1825	32.5928	13.7759	15.0437	30.5331	1023.98	100002	100000
12.2	26.5349	6.7069	0	22.658	12.8732	33.9984	33.0118	13.5091	15.2125	30.93	1063.64	100002	100000
12.25	26.8156	6.81367	0	22.3071	13.0718	33.8156	33.4291	13.2438	15.381	31.3255	1104.83	100002	100000
12.3	27.0957	6.91976	0	21.9578	13.2693	33.6343	33.8443	12.9801	15.549	31.7192	1147.63	100002	100000
12.35	27.3749	7.0251	0	21.6102	13.4654	33.4545	34.2573	12.7184	15.7165	32.1111	1192.08	100002	100000
12.4	27.6532	7.12961	0	21.2646	13.66	33.2763	34.6678	12.4587	15.8835	32.501	1238.25	100002	100000
12.45	27.9305	7.23323	0	20.9211	13.8531	33.0999	35.0757	12.2012	16.0499	32.8886	1286.21	100002	100000
12.5	28.2068	7.33589	0	20.5799	14.0445	32.9252	35.4808	11.9461	16.2157	33.2739	1336.02	100002	100000
12.55	28.4819	7.43752	0	20.2411	14.234	32.7524	35.8828	11.6935	16.3807	33.6566	1387.77	100002	100000
12.6	28.7557	7.53807	0	19.9048	14.4217	32.5816	36.2816	11.4436	16.545	34.0366	1441.52	100002	100000
12.65	29.0283	7.63748	0	19.5713	14.6074	32.4127	36.6771	11.1966	16.7086	34.4137	1497.35	100002	100000
12.7	29.2995	7.73568	0	19.2407	14.7909	32.246	37.0689	10.9526	16.8713	34.7877	1555.35	100002	100000
12.75	29.5692	7.83264	0	18.9131	14.9723	32.0814	37.457	10.7116	17.0332	35.1587	1615.59	100002	100000
12.8	29.8375	7.9283	0	18.5886	15.1513	31.9189	37.8412	10.4739	17.1941	35.5263	1678.16	100002	100000
12.85	30.1042	8.02262	0	18.2673	15.328	31.7588	38.2214	10.2395	17.3541	35.8906	1743.16	100002	100000
12.9	30.3692	8.11555	0	17.9494	15.5023	31.6009	38.5975	10.0086	17.5131	36.2513	1810.68	100002	100000
12.95	30.6325	8.20706	0	17.635	15.674	31.4453	38.9692	9.78121	17.6711	36.6084	1880.81	100002	100000
13	30.8941	8.29711	0	17.3241	15.8432	31.2921	39.3366	9.55743	17.8281	36.9617	1953.65	100002	100000
13.05	31.1538	8.38568	0	17.0169	16.0098	31.1412	39.6994	9.33735	17.9839	37.3112	2029.32	100002	100000
13.1	31.4117	8.47272	0	16.7135	16.1736	30.9928	40.0577	9.12103	18.1387	37.6568	2107.92	100002	100000
13.15	31.6677	8.55823	0	16.4138	16.3348	30.8468	40.4113	8.90854	18.2922	37.9984	2189.57	100002	100000
13.2	31.9217	8.64218	0	16.118	16.4932	30.7033	40.7601	8.69993	18.4447	38.3359	2274.37	100002	100000
13.25	32.1737	8.72455	0	15.8261	16.6488	30.5622	41.1041	8.49524	18.5959	38.6693	2362.46	100002	100000
13.3	32.4237	8.80533	0	15.5382	16.8015	30.4237	41.4432	8.2945	18.7458	38.9986	2453.96	100002	100000
13.35	32.6716	8.88451	0	15.2544	16.9515	30.2876	41.7774	8.09775	18.8946	39.3235	2549.01	100002	100000
13.4	32.9173	8.96207	0	14.9746	17.0986	30.1539	42.1066	7.90501	19.042	39.6442	2647.74	100002	100000
13.45	33.1609	9.03802	0	14.6989	17.2428	30.0228	42.4307	7.71628	19.1881	39.9606	2750.29	100002	100000
13.5	33.4023	9.11235	0	14.4273	17.3841	29.8941	42.7499	7.53157	19.333	40.2726	2856.81	100002	100000
13.55	33.6414	9.18506	0	14.1598	17.5226	29.7679	43.064	7.35088	19.4765	40.5803	2967.46	100002	100000
13.6	33.8783	9.25615	0	13.8965	17.6582	29.6442	43.373	7.1742	19.6186	40.8836	3082.39	100002	100000
13.65	34.1129	9.32564	0	13.6374	17.7909	29.5228	43.677	7.00153	19.7594	41.1824	3201.78	100002	100000
13.7	34.3452	9.39353	0	13.3824	17.9208	29.4039	43.9759	6.83283	19.8988	41.4769	3325.79	100002	100000
13.75	34.5752	9.45982	0	13.1316	18.0479	29.2874	44.2697	6.66809	20.0368	41.767	3454.61	100002	100000
13.8	34.8029	9.52454	0	12.8849	18.1721	29.1733	44.5585	6.50726	20.1733	42.0526	3588.41	100002	100000
13.85	35.0282	9.58769	0	12.6424	18.2935	29.0615	44.8423	6.35033	20.3085	42.3339	3727.39	100002	100000
13.9	35.2511	9.6493	0	12.4039	18.4122	28.9521	45.1211	6.19725	20.4423	42.6108	3871.76	100002	100000
13.95	35.4717	9.70937	0	12.1696	18.5282	28.8449	45.3949	6.04797	20.5746	42.8834	4021.72	100002	100000
14	35.6898	9.76793	0	11.9393	18.6414	28.74	45.6638	5.90245	20.7055	43.1516	4177.49	100002	100000
14.05	35.9055	9.82499	0	11.713	18.7519	28.6374	45.9279	5.76064	20.8349	43.4155	4339.29	100002	100000
14.1	36.1189	9.88059	0	11.4908	18.8599	28.5369	46.1871	5.62248	20.9629	43.6751	4507.36	100002	100000
14.15	36.3298	9.93474	0	11.2725	18.9652	28.4387	46.4415	5.48792	21.0895	43.9305	4681.93	100002	100000
14.2	36.5383	9.98746	0	11.0581	19.0679	28.3425	46.6912	5.3569	21.2146	44.1816	4863.27	100002	100000
14.25	36.7443	10.0388	0	10.8476	19.1682	28.2485	46.9361	5.22936	21.3382	44.4286	5051.64	100002	100000
14.3	36.948	10.0887	0	10.641	19.2659	28.1565	47.1765	5.10524	21.4604	44.6714	5247.29	100002	100000
14.35	37.1492	10.1373	0	10.4381	19.3612	28.0665	47.4123	4.98447	21.5811	44.9101	5450.53	100002	100000
14.4	37.348	10.1846	0	10.239	19.4542	27.9786	47.6436	4.86698	21.7004	45.1448	5661.64	100002	100000
14.45	37.5443	10.2306	0	10.0436	19.5448	27.8925	47.8704	4.75272	21.8182	45.3755	5880.92	100002	100000
14.5	37.7383	10.2753	0	9.85182	19.6331	27.8084	48.0929	4.64161	21.9346	45.6022	6108.7	100002	100000
14.55	37.9299	10.3188	0	9.66365	19.7191	27.7262	48.311	4.53358	22.0495	45.825	6345.3	100002	100000
14.6	38.119	10.361	0	9.47903	19.8029	27.6458	48.5249	4.42857	22.163	46.0439	6591.07	100002	100000
14.65	38.3058	10.4021	0	9.2979	19.8846	27.5673	48.7346	4.3265	22.2751	46.2591	6846.35	100002	100000
14.7	38.4902	10.442	0	9.12021	19.9642	27.4904	48.9402	4.22732	22.3857	46.4704	7111.52	100002	100000
14.75	38.6722	10.4808	0	8.9459	20.0417	27.4154	49.1418	4.13094	22.4949	46.6781	7386.96	100002	100000
14.8	38.8518	10.5185	0	8.77492	20.1172	27.342	49.3394	4.03731	22.6027	46.8821	7673.07	100002	100000
14.85	39.0291	10.5551	0	8.60721	20.1907	27.2702	49.533	3.94634	22.7091	47.0825	7970.26	100002	100000
14.9	39.204	10.5906	0	8.44271	20.2623	27.2001	49.7229	3.85799	22.814	47.2793	8278.96	100002	100000
14.95	39.3767	10.6252	0	8.28138	20.332	27.1315	49.909	3.77217	22.9176	47.4727	8599.62	100002	100000
15	39.547	10.6587	0	8.12316	20.3999	27.0645	50.0913	3.68882	23.0198	47.6626	8932.7	100002	100000
15.05	39.715	10.6913	0	7.96799	20.466	26.999	50.2701	3.60788	23.1206	47.8491	9278.68	100002	100000
15.1	39.8807	10.7229	0	7.81582	20.5304	26.935	50.4453	3.52928	23.22	48.0323	9638.05	100002	100000
15.15	40.0442	10.7536	0	7.66658	20.5931	26.8725	50.617	3.45296	23.3181	48.2122	10011.4	100002	100000
15.2	40.2054	10.7835	0	7.52024	20.6541	26.8113	50.7852	3.37885	23.4148	48.3889	10399.1	100002	100000
15.25	40.3644	10.8124	0	7.37673	20.7135	26.7515	50.9502	3.3069	23.5102	48.5624	10801.9	100002	100000
15.3	40.5211	10.8405	0	7.23601	20.7713	26.693	51.1118	3.23704	23.6043	48.7328	11220.3	100002	100000
15.35	40.6757	10.8678	0	7.09801	20.8277	26.6359	51.2702	3.16921	23.697	48.9001	11654.8	100002	100000
15.4	40.8281	10.8943	0	6.96269	20.8825	26.58	51.4254	3.10336	23.7885	49.0644	12106.3	100002	100000
15.45	40.9783	10.9201	0	6.82999	20.9359	26.5254	51.5775	3.03942	23.8786	49.2258	12575.1	100002	100000
15.5	41.1264	10.945	0	6.69988	20.9879	26.472	51.7266	2.97735	23.9674	49.3842	13062.2	100002	100000
15.55	41.2723	10.9693	0	6.57228	21.0385	26.4198	51.8728	2.91709	24.055	49.5398	13568.1	100002	100000
15.6	41.4162	10.9928	0	6.44716	21.0878	26.3688	52.016	2.85858	24.1413	49.6925	14093.6	100002	100000
15.65	41.5579	11.0157	0	6.32447	21.1358	26.3189	52.1563	2.80178	24.2264	49.8425	14639.5	100002	100000
15.7	41.6976	11.0379	0	6.20416	21.1825	26.2701	52.2939	2.74662	24.3102	49.9898	15206.5	100002	100000
15.75	41.8353	11.0594	0	6.08618	21.228	26.2224	52.4287	2.69307	24.3928	50.1343	15795.5	100002	100000
15.8	41.9709	11.0804	0	5.97049	21.2723	26.1757	52.5608	2.64108	24.4741	50.2763	16407.3	100002	100000
15.85	42.1045	11.1007	0	5.85704	21.3155	26.1301	52.6903	2.59059	24.5543	50.4157	17042.8	100002	100000
15.9	42.2361	11.1204	0	5.74579	21.3575	26.0854	52.8173	2.54156	24.6333	50.5526	17702.9	100002	100000
15.95	42.3658	11.1396	0	5.63669	21.3985	26.0418	52.9417	2.49395	24.7111	50.687	18388.5	100002	100000
16	42.4935	11.1582	0	5.5297	21.4384	25.9991	53.0636	2.44772	24.7877	50.8189	19100.7	100002	100000
16.05	42.6193	11.1762	0	5.42478	21.4772	25.9573	53.1832	2.40282	24.8632	50.9485	19840.5	100002	100000
16.1	42.7432	11.1938	0	5.32188	21.5151	25.9164	53.3003	2.35921	24.9375	51.0757	20609	100002	100000
16.15	42.8652	11.2108	0	5.22097	21.552	25.8764	53.4152	2.31685	25.0107	51.2006	21407.2	100002	100000
16.2	42.9854	11.2274	0	5.12201	21.5879	25.8373	53.5278	2.27571	25.0828	51.3232	22236.4	100002	100000
16.25	43.1037	11.2435	0	5.02496	21.6229	25.7991	53.6381	2.23574	25.1538	51.4436	23097.6	100002	100000
16.3	43.2202	11.2591	0	4.92977	21.657	25.7616	53.7463	2.19691	25.2237	51.5618	23992.2	100002	100000
16.35	43.3349	11.2743	0	4.83642	21.6903	25.725	53.8524	2.15919	25.2926	51.6778	24921.5	100002	100000
16.4	43.4478	11.289	0	4.74486	21.7227	25.6892	53.9564	2.12254	25.3603	51.7918	25886.7	100002	100000
16.45	43.559	11.3033	0	4.65506	21.7543	25.6541	54.0583	2.08693	25.427	51.9036	26889.4	100002	100000
16.5	43.6685	11.3173	0	4.56698	21.7851	25.6198	54.1582	2.05232	25.4927	52.0135	27930.8	100002	100000
16.55	43.7762	11.3308	0	4.4806	21.8151	25.5862	54.2562	2.01869	25.5573	52.1213	29012.6	100002	100000
16.6	43.8822	11.344	0	4.39587	21.8443	25.5533	54.3522	1.986	25.6209	52.2272	30136.3	100002	100000
16.65	43.9866	11.3567	0	4.31276	21.8728	25.5211	54.4464	1.95423	25.6836	52.3311	31303.6	100002	100000
16.7	44.0893	11.3692	0	4.23125	21.9006	25.4896	54.5388	1.92335	25.7452	52.4332	32516	100002	100000
16.75	44.1904	11.3813	0	4.15129	21.9278	25.4588	54.6293	1.89333	25.8059	52.5334	33775.4	100002	100000
16.8	44.2899	11.393	0	4.07287	21.9542	25.4286	54.7181	1.86414	25.8655	52.6318	35083.6	100002	100000
16.85	44.3878	11.4044	0	3.99594	21.98	25.399	54.8051	1.83576	25.9243	52.7284	36442.4	100002	100000
16.9	44.4841	11.4155	0	3.92048	22.0052	25.3701	54.8905	1.80816	25.9821	52.8232	37853.9	100002	100000
16.95	44.5789	11.4263	0	3.84645	22.0297	25.3418	54.9741	1.78133	26.039	52.9163	39320.1	100002	100000
17	44.6722	11.4368	0	3.77384	22.0536	25.3141	55.0562	1.75522	26.0949	53.0077	40843	100002	100000
17.05	44.7639	11.447	0	3.70262	22.077	25.2869	55.1367	1.72984	26.15	53.0975	42425	100002	100000
17.1	44.8542	11.457	0	3.63274	22.0998	25.2603	55.2156	1.70514	26.2041	53.1856	44068.2	100002	100000
17.15	44.943	11.4667	0	3.5642	22.122	25.2343	55.293	1.68112	26.2574	53.2721	45775.1	100002	100000
17.2	45.0303	11.4761	0	3.49696	22.1437	25.2088	55.3689	1.65774	26.3098	53.357	47548	100002	100000
17.25	45.1163	11.4852	0	3.431	22.1649	25.1838	55.4433	1.635	26.3614	53.4404	49389.7	100002	100000
17.3	45.2008	11.4941	0	3.36629	22.1855	25.1594	55.5163	1.61287	26.4121	53.5223	51302.7	100002	100000
17.35	45.2839	11.5028	0	3.30281	22.2057	25.1354	55.5879	1.59133	26.462	53.6027	53289.7	100002	100000
17.4	45.3657	11.5112	0	3.24053	22.2254	25.1119	55.6581	1.57037	26.511	53.6816	55353.7	100002	100000
17.45	45.4461	11.5194	0	3.17943	22.2446	25.089	55.7269	1.54997	26.5593	53.759	57497.7	100002	100000
17.5	45.5252	11.5274	0	3.11949	22.2633	25.0665	55.7945	1.5301	26.6067	53.8351	59724.7	100002	100000
17.55	45.603	11.5352	0	3.06069	22.2817	25.0444	55.8607	1.51077	26.6534	53.9098	62037.9	100002	100000
17.6	45.6794	11.5428	0	3.003	22.2995	25.0228	55.9256	1.49194	26.6993	53.9831	64440.7	100002	100000
17.65	45.7547	11.5502	0	2.9464	22.317	25.0017	55.9893	1.47361	26.7444	54.055	66936.6	100002	100000
17.7	45.8286	11.5573	0	2.89087	22.3341	24.9809	56.0518	1.45575	26.7888	54.1257	69529.1	100002	100000
17.75	45.9013	11.5643	0	2.83639	22.3507	24.9606	56.1131	1.43837	26.8324	54.1951	72222.1	100002	100000
17.8	45.9728	11.5712	0	2.78294	22.367	24.9407	56.1732	1.42143	26.8753	54.2632	75019.3	100002	100000
17.85	46.0431	11.5778	0	2.73049	22.3829	24.9212	56.2322	1.40494	26.9175	54.33	77924.9	100002	100000
17.9	46.1122	11.5843	0	2.67904	22.3984	24.9022	56.29	1.38887	26.9589	54.3957	80943	100002	100000
17.95	46.1802	11.5906	0	2.62856	22.4135	24.8834	56.3468	1.37321	26.9997	54.4601	84078.1	100002	100000
18	46.247	11.5967	0	2.57904	22.4284	24.8651	56.4024	1.35795	27.0398	54.5234	87334.5	100002	100000
18.05	46.3126	11.6027	0	2.53044	22.4428	24.8471	56.457	1.34309	27.0792	54.5855	90717.1	100002	100000
18.1	46.3772	11.6085	0	2.48277	22.457	24.8295	56.5105	1.3286	27.1179	54.6464	94230.7	100002	100000
18.15	46.4406	11.6142	0	2.43599	22.4708	24.8123	56.563	1.31448	27.156	54.7063	97880.4	100002	100000
18.2	46.503	11.6197	0	2.39009	22.4843	24.7954	56.6146	1.30072	27.1934	54.765	100001	100002	100000
18.25	46.5643	11.6251	0	2.34506	22.4975	24.7788	56.6651	1.2873	27.2302	54.8227	100001	100002	100000
18.3	46.6245	11.6304	0	2.30087	22.5104	24.7626	56.7147	1.27422	27.2663	54.8793	100001	100002	100000
18.35	46.6838	11.6355	0	2.25752	22.523	24.7467	56.7633	1.26147	27.3019	54.9349	100001	100002	100000
18.4	46.742	11.6405	0	2.21498	22.5353	24.7311	56.811	1.24903	27.3368	54.9895	100001	100002	100000
18.45	46.7992	11.6454	0	2.17325	22.5474	24.7158	56.8578	1.23691	27.3711	55.0431	100001	100002	100000
18.5	46.8554	11.6502	0	2.1323	22.5592	24.7008	56.9037	1.22508	27.4048	55.0956	100001	100002	100000
18.55	46.9106	11.6548	0	2.09212	22.5707	24.6861	56.9487	1.21355	27.438	55.1473	100001	100002	100000
18.6	46.9649	11.6593	0	2.0527	22.5819	24.6717	56.9929	1.2023	27.4706	55.1979	100001	100002	100000
18.65	47.0183	11.6638	0	2.01402	22.593	24.6576	57.0363	1.19133	27.5026	55.2477	100001	100002	100000
18.7	47.0707	11.6681	0	1.97607	22.6037	24.6438	57.0788	1.18063	27.534	55.2965	100001	100002	100000
[truncated: 587 more rows]

## Sheet: FP_BH1
Time	RI	FP	BH	fructose	formate	acetate	butyrate	unknown compound	H20	CO2	lag_RI	lag_FP	lag_BH
[truncated: 961 more rows]

## Sheet: RI_BH7
Time	RI	FP	BH	fructose	formate	acetate	butyrate	unknown compound	H20	CO2	lag_RI	lag_FP	lag_BH
[truncated: 961 more rows]

[truncated: 3 more sheets: FP_BH3, RI_FP_BH10, RI_FP_BH12]
