# Supplementary material for: Integrated culturing, modeling and transcriptomics uncovers complex interactions and emergent behavior in a three-species synthetic gut community
Source: eLife. 2018 Oct 16;7:e37090. doi: 10.7554/eLife.37090 (PMC6237439; doi:10.7554/eLife.37090)
Supplement: Figure 5—source data 1. [file elife-37090-fig5-data1.xlsx]

## Sheet: RI14
Time	RI	FP	BH	fructose	formate	acetate	butyrate	unknown compound	H20	CO2	lag_RI	lag_FP	lag_BH
0.05	2.68333	0	0	49.2462	-0.000453754	48.1166	0.0199652	30	0.0259637	0.0833954	1.1121	0.112733	0.109543		All tables report simulation results for specific fermentation experiments with the kinetic model using parameterization 2.
0.1	2.72367	0	0	49.2315	-0.000937781	48.106	0.0412624	30	0.0380644	0.103563	1.23677	0.127087	0.119998		Experiment identifiers are given as sheet names.
0.15	2.7666	0	0	49.2158	-0.00145302	48.0947	0.0639329	30	0.0509454	0.125032	1.37541	0.14327	0.13145		RI: Roseburia intestinalis L1-82
0.2	2.81222	0	0	49.1992	-0.00200035	48.0827	0.0880156	30	0.0646287	0.147837	1.5296	0.161512	0.143994		FP: Faecalibacterium prausnitzii A2-165
0.25	2.86057	0	0	49.1816	-0.00258059	48.07	0.113546	30	0.0791346	0.172014	1.70107	0.182077	0.157736		BH: Blautia hydrogenotrophica S5a33
0.3	2.91173	0	0	49.163	-0.00319448	48.0565	0.140557	30	0.0944819	0.197592	1.89176	0.20526	0.172789
0.35	2.96575	0	0	49.1434	-0.00384272	48.0423	0.16908	30	0.110688	0.224602	2.10382	0.231396	0.189279
0.4	3.02268	0	0	49.1226	-0.00452594	48.0273	0.199141	30	0.127768	0.25307	2.33966	0.26086	0.207343
0.45	3.08258	0	0	49.1008	-0.00524471	48.0116	0.230767	30	0.145738	0.283019	2.60195	0.294075	0.227131
0.5	3.14548	0	0	49.0779	-0.00599959	47.995	0.263982	30	0.16461	0.314472	2.89363	0.331521	0.248807
0.55	3.21144	0	0	49.0539	-0.00679105	47.9777	0.298806	30	0.184396	0.347449	3.21801	0.373733	0.272551
0.6	3.28048	0	0	49.0288	-0.00761956	47.9595	0.33526	30	0.205109	0.38197	3.57875	0.42132	0.298562
0.65	3.35265	0	0	49.0025	-0.00848554	47.9405	0.373364	30	0.226758	0.418053	3.97993	0.474966	0.327054
0.7	3.42797	0	0	48.9751	-0.00938943	47.9207	0.413135	30	0.249356	0.455715	4.42608	0.535442	0.358266
0.75	3.50649	0	0	48.9465	-0.0103316	47.9001	0.454591	30	0.27291	0.494973	4.92224	0.603619	0.392457
0.8	3.58823	0	0	48.9168	-0.0113125	47.8786	0.497749	30	0.297432	0.535842	5.47402	0.680477	0.429911
0.85	3.67322	0	0	48.8858	-0.0123324	47.8563	0.542627	30	0.322931	0.57834	6.08766	0.767121	0.470938
0.9	3.76151	0	0	48.8537	-0.0133919	47.8331	0.589243	30	0.349417	0.622484	6.77009	0.864797	0.515882
0.95	3.85312	0	0	48.8203	-0.0144912	47.8091	0.637614	30	0.376901	0.66829	7.52901	0.974909	0.565114
1	3.9481	0	0	48.7858	-0.0156309	47.7842	0.68776	30	0.405393	0.715777	8.37302	1.09904	0.619045
1.05	4.04647	0	0	48.75	-0.0168114	47.7583	0.739701	30	0.434905	0.764963	9.31163	1.23898	0.678122
1.1	4.14828	0	0	48.7129	-0.0180331	47.7316	0.793457	30	0.465448	0.815869	10.3555	1.39674	0.742838
1.15	4.25357	0	0	48.6746	-0.0192966	47.704	0.84905	30	0.497035	0.868514	11.5163	1.57458	0.813729
1.2	4.36238	0	0	48.635	-0.0206024	47.6755	0.906504	30	0.529679	0.922921	12.8073	1.77507	0.891386
1.25	4.47477	0	0	48.5941	-0.021951	47.646	0.965843	30	0.563395	0.979113	14.243	2.00109	0.976454
1.3	4.59077	0	0	48.5518	-0.023343	47.6156	1.02709	30	0.598196	1.03712	15.8396	2.25588	1.06964
1.35	4.71045	0	0	48.5083	-0.0247792	47.5843	1.09028	30	0.634099	1.09695	17.6152	2.54312	1.17172
1.4	4.83386	0	0	48.4634	-0.02626	47.5519	1.15544	30	0.671121	1.15866	19.5899	2.86693	1.28354
1.45	4.96105	0	0	48.4171	-0.0277863	47.5186	1.2226	30	0.709278	1.22225	21.7859	3.23197	1.40603
1.5	5.09208	0	0	48.3694	-0.0293588	47.4843	1.29179	30	0.748589	1.28777	24.2282	3.64349	1.54022
1.55	5.22703	0	0	48.3202	-0.0309781	47.449	1.36304	30	0.789073	1.35524	26.9441	4.1074	1.6872
1.6	5.36596	0	0	48.2697	-0.0326452	47.4127	1.43639	30	0.830751	1.42471	29.9646	4.63039	1.84822
1.65	5.50893	0	0	48.2176	-0.0343609	47.3753	1.51188	30	0.873643	1.49619	33.3236	5.21997	2.0246
1.7	5.65602	0	0	48.1641	-0.036126	47.3368	1.58955	30	0.917771	1.56974	37.0592	5.88462	2.21782
1.75	5.80731	0	0	48.109	-0.0379415	47.2973	1.66943	30	0.963158	1.64539	41.2135	6.63389	2.42947
1.8	5.96288	0	0	48.0524	-0.0398083	47.2567	1.75157	30	1.00983	1.72317	45.8335	7.47857	2.66132
1.85	6.1228	0	0	47.9942	-0.0417274	47.2149	1.836	30	1.0578	1.80313	50.9715	8.4308	2.9153
1.9	6.28716	0	0	47.9344	-0.0436997	47.172	1.92279	30	1.10711	1.88531	56.6854	9.50428	3.19352
1.95	6.45605	0	0	47.8729	-0.0457264	47.128	2.01196	30	1.15778	1.96976	63.0398	10.7144	3.49829
2	6.62956	0	0	47.8097	-0.0478085	47.0827	2.10357	30	1.20983	2.05651	70.1066	12.0787	3.83214
2.05	6.80778	0	0	47.7449	-0.0499472	47.0363	2.19767	30	1.2633	2.14562	77.9655	13.6166	4.19785
2.1	6.99081	0	0	47.6782	-0.0521434	46.9886	2.29431	30	1.31821	2.23713	86.7054	15.3504	4.59847
2.15	7.17873	0	0	47.6098	-0.0543986	46.9396	2.39354	30	1.37458	2.3311	96.4251	17.305	5.03732
2.2	7.37167	0	0	47.5396	-0.0567138	46.8894	2.49541	30	1.43246	2.42756	107.234	19.5084	5.51804
2.25	7.5697	0	0	47.4675	-0.0590902	46.8379	2.59997	30	1.49187	2.52658	119.255	21.9923	6.04465
2.3	7.77295	0	0	47.3935	-0.0615291	46.785	2.70728	30	1.55285	2.6282	132.624	24.7926	6.62151
2.35	7.98151	0	0	47.3176	-0.0640319	46.7308	2.8174	30	1.61542	2.73248	147.491	27.9493	7.25342
2.4	8.1955	0	0	47.2397	-0.0665998	46.6752	2.93039	30	1.67961	2.83948	164.025	31.5081	7.94564
2.45	8.41503	0	0	47.1598	-0.0692341	46.6182	3.0463	30	1.74547	2.94924	182.412	35.5199	8.70392
2.5	8.6402	0	0	47.0779	-0.0719362	46.5598	3.16519	30	1.81303	3.06183	202.86	40.0426	9.53456
2.55	8.87115	0	0	46.9938	-0.0747076	46.4999	3.28713	30	1.88231	3.1773	225.601	45.1412	10.4445
2.6	9.10798	0	0	46.9076	-0.0775495	46.4385	3.41218	30	1.95336	3.29572	250.891	50.8889	11.4412
2.65	9.35081	0	0	46.8192	-0.0804635	46.3756	3.54039	30	2.02621	3.41713	279.016	57.3685	12.5331
2.7	9.59977	0	0	46.7286	-0.083451	46.3112	3.67184	30	2.10089	3.54161	310.293	64.6731	13.7292
2.75	9.85497	0	0	46.6357	-0.0865134	46.2452	3.80659	30	2.17746	3.66922	345.077	72.9078	15.0394
2.8	10.1165	0	0	46.5405	-0.0896524	46.1775	3.9447	30	2.25593	3.8	383.76	82.191	16.4747
2.85	10.3846	0	0	46.4429	-0.0928693	46.1083	4.08625	30	2.33635	3.93404	426.78	92.6562	18.0469
2.9	10.6593	0	0	46.3429	-0.0961657	46.0374	4.23129	30	2.41876	4.07139	474.622	104.454	19.7692
2.95	10.9408	0	0	46.2404	-0.0995431	45.9647	4.3799	30	2.5032	4.21212	527.827	117.754	21.6558
3	11.2291	0	0	46.1355	-0.103003	45.8904	4.53214	30	2.5897	4.35629	586.996	132.747	23.7225
3.05	11.5245	0	0	46.028	-0.106547	45.8143	4.68809	30	2.67831	4.50397	652.798	149.65	25.9864
3.1	11.827	0	0	45.9179	-0.110177	45.7364	4.84781	30	2.76906	4.65522	725.977	168.704	28.4664
3.15	12.1368	0	0	45.8051	-0.113895	45.6568	5.01137	30	2.86199	4.81011	807.359	190.185	31.183
3.2	12.454	0	0	45.6896	-0.117701	45.5752	5.17885	30	2.95715	4.96871	897.864	214.401	34.1589
3.25	12.7787	0	0	45.5714	-0.121598	45.4918	5.35032	30	3.05458	5.13108	998.515	241.7	37.4188
3.3	13.1111	0	0	45.4504	-0.125587	45.4065	5.52585	30	3.15431	5.2973	1110.45	272.475	40.9898
3.35	13.4514	0	0	45.3266	-0.12967	45.3193	5.7055	30	3.25638	5.46743	1234.93	307.169	44.9016
3.4	13.7996	0	0	45.1998	-0.133849	45.2301	5.88936	30	3.36085	5.64153	1373.37	346.28	49.1868
3.45	14.1559	0	0	45.0701	-0.138125	45.139	6.07749	30	3.46774	5.81968	1527.32	390.371	53.8808
3.5	14.5204	0	0	44.9374	-0.142499	45.0458	6.26996	30	3.5771	6.00195	1698.53	440.076	59.0228
3.55	14.8933	0	0	44.8017	-0.146974	44.9505	6.46685	30	3.68897	6.1884	1888.94	496.11	64.6556
3.6	15.2747	0	0	44.6629	-0.151551	44.8532	6.66823	30	3.80339	6.3791	2100.69	559.279	70.8259
3.65	15.6648	0	0	44.5209	-0.156231	44.7538	6.87416	30	3.92039	6.57411	2336.17	630.491	77.5851
3.7	16.0636	0	0	44.3757	-0.161017	44.6522	7.08473	30	4.04003	6.77351	2598.06	710.77	84.9893
3.75	16.4713	0	0	44.2273	-0.165909	44.5485	7.3	30	4.16235	6.97736	2889.3	801.27	93.1001
3.8	16.888	0	0	44.0757	-0.17091	44.4426	7.52003	30	4.28737	7.18573	3213.19	903.295	101.985
3.85	17.3139	0	0	43.9206	-0.176021	44.3346	7.74491	30	4.41513	7.39868	3573.39	1018.31	111.718
3.9	17.7491	0	0	43.7622	-0.181243	44.2242	7.97469	30	4.54569	7.61628	3973.97	1147.97	122.379
3.95	18.1937	0	0	43.6004	-0.186578	44.1116	8.20944	30	4.67907	7.83858	4419.45	1294.14	134.058
4	18.6479	0	0	43.4351	-0.192028	43.9968	8.44923	30	4.81532	8.06566	4914.87	1458.92	146.852
4.05	19.1117	0	0	43.2662	-0.197594	43.8796	8.69413	30	4.95447	8.29756	5465.83	1644.68	160.867
4.1	19.5853	0	0	43.0938	-0.203277	43.7601	8.94419	30	5.09655	8.53437	6078.55	1854.09	176.219
4.15	20.0688	0	0	42.9179	-0.209079	43.6383	9.19948	30	5.2416	8.77612	6759.95	2090.17	193.036
4.2	20.5623	0	0	42.7382	-0.215001	43.5141	9.46006	30	5.38965	9.02288	7517.74	2356.31	211.458
4.25	21.0659	0	0	42.5549	-0.221045	43.3876	9.72599	30	5.54075	9.2747	8360.48	2656.33	231.638
4.3	21.5798	0	0	42.3678	-0.227212	43.2586	9.99731	30	5.69491	9.53164	9297.69	2994.55	253.744
4.35	22.104	0	0	42.177	-0.233502	43.1273	10.2741	30	5.85218	9.79375	10340	3375.84	277.96
4.4	22.6387	0	0	41.9824	-0.239918	42.9935	10.5564	30	6.01257	10.0611	11499.1	3805.68	304.486
4.45	23.1839	0	0	41.784	-0.24646	42.8573	10.8442	30	6.17612	10.3337	12788.1	4290.25	333.544
4.5	23.7397	0	0	41.5817	-0.25313	42.7186	11.1377	30	6.34286	10.6116	14221.7	4836.52	365.376
4.55	24.3061	0	0	41.3755	-0.259927	42.5775	11.4368	30	6.51281	10.8948	15815.9	5452.35	400.245
4.6	24.8834	0	0	41.1653	-0.266855	42.4339	11.7416	30	6.68598	11.1834	17588.9	6146.58	438.441
4.65	25.4715	0	0	40.9513	-0.273912	42.2879	12.0521	30	6.86242	11.4775	19560.6	6929.21	480.283
4.7	26.0705	0	0	40.7332	-0.2811	42.1394	12.3684	30	7.04212	11.777	21753.3	7811.5	526.118
4.75	26.6805	0	0	40.5112	-0.28842	41.9885	12.6905	30	7.22512	12.082	24191.9	8806.12	576.327
4.8	27.3015	0	0	40.2851	-0.295872	41.8351	13.0184	30	7.41142	12.3925	26903.8	9927.38	631.328
4.85	27.9336	0	0	40.0551	-0.303457	41.6792	13.3521	30	7.60105	12.7085	29919.7	11191.4	691.578
4.9	28.5768	0	0	39.8209	-0.311175	41.5209	13.6917	30	7.794	13.0301	33273.7	12616.4	757.578
4.95	29.2311	0	0	39.5828	-0.319027	41.3601	14.0372	30	7.9903	13.3573	37003.7	14222.8	829.876
5	29.8966	0	0	39.3405	-0.327013	41.1969	14.3886	30	8.18994	13.69	41151.8	16033.8	909.074
5.05	30.5732	0	0	39.0942	-0.335132	41.0313	14.7458	30	8.39293	14.0283	45764.9	18075.3	995.83
5.1	31.261	0	0	38.8439	-0.343386	40.8633	15.109	30	8.59926	14.3722	50895.1	20376.8	1090.87
5.15	31.96	0	0	38.5895	-0.351773	40.6929	15.478	30	8.80895	14.7217	56600.5	22971.4	1194.97
5.2	32.6701	0	0	38.331	-0.360295	40.5201	15.853	30	9.02198	15.0768	62945.4	25896.3	1309.01
5.25	33.3913	0	0	38.0685	-0.368949	40.345	16.2338	30	9.23835	15.4374	70001.6	29193.6	1433.93
5.3	34.1236	0	0	37.8019	-0.377737	40.1676	16.6204	30	9.45804	15.8035	77848.8	32910.7	1570.78
5.35	34.8669	0	0	37.5313	-0.386657	39.9879	17.0129	30	9.68104	16.1752	86575.6	37101.2	1720.68
5.4	35.6213	0	0	37.2568	-0.395709	39.8059	17.4112	30	9.90734	16.5524	96280.7	41825.2	1884.89
5.45	36.3865	0	0	36.9782	-0.404892	39.6218	17.8152	30	10.1369	16.935	100000	47150.9	2064.78
5.5	37.1625	0	0	36.6957	-0.414204	39.4354	18.225	30	10.3697	17.323	100000	53154.6	2261.83
5.55	37.9493	0	0	36.4093	-0.423646	39.2469	18.6404	30	10.6058	17.7164	100000	59922.9	2477.69
5.6	38.7468	0	0	36.1191	-0.433215	39.0564	19.0615	30	10.845	18.1151	100000	67553.3	2714.15
5.65	39.5547	0	0	35.825	-0.44291	38.8638	19.488	30	11.0874	18.5191	100000	76155.3	2973.18
5.7	40.373	0	0	35.5271	-0.45273	38.6692	19.9201	30	11.3329	18.9282	100000	85852.6	3256.92
5.75	41.2016	0	0	35.2255	-0.462673	38.4726	20.3576	30	11.5815	19.3425	100000	96784.8	3567.75
5.8	42.0403	0	0	34.9202	-0.472738	38.2742	20.8005	30	11.8331	19.7619	100000	100000	3908.26
5.85	42.889	0	0	34.6113	-0.482921	38.0739	21.2485	30	12.0876	20.1862	100000	100000	4281.25
5.9	43.7473	0	0	34.2989	-0.493222	37.8719	21.7018	30	12.3452	20.6154	100000	100000	4689.83
5.95	44.6153	0	0	33.9829	-0.503637	37.6681	22.16	30	12.6056	21.0494	100000	100000	5137.41
6	45.4926	0	0	33.6636	-0.514165	37.4628	22.6233	30	12.8687	21.488	100000	100000	5627.7
6.05	46.3791	0	0	33.3409	-0.524803	37.2558	23.0913	30	13.1347	21.9313	100000	100000	6164.81
6.1	47.2745	0	0	33.015	-0.535547	37.0474	23.5641	30	13.4033	22.379	100000	100000	6753.16
6.15	48.1786	0	0	32.6859	-0.546396	36.8375	24.0414	30	13.6745	22.831	100000	100000	7397.65
6.2	49.0911	0	0	32.3537	-0.557346	36.6264	24.5232	30	13.9483	23.2873	100000	100000	8103.64
6.25	50.0117	0	0	32.0186	-0.568395	36.4139	25.0094	30	14.2245	23.7476	100000	100000	8877
6.3	50.9403	0	0	31.6806	-0.579537	36.2003	25.4996	30	14.5031	24.2119	100000	100000	9724.16
6.35	51.8765	0	0	31.3399	-0.590771	35.9856	25.9939	30	14.7839	24.68	100000	100000	10652.2
6.4	52.8199	0	0	30.9964	-0.602093	35.7698	26.4921	30	15.0669	25.1517	100000	100000	11668.8
6.45	53.7704	0	0	30.6505	-0.613498	35.5532	26.9939	30	15.3521	25.6269	100000	100000	12782.4
6.5	54.7275	0	0	30.3021	-0.624983	35.3357	27.4993	30	15.6392	26.1055	100000	100000	14002.3
6.55	55.6909	0	0	29.9514	-0.636545	35.1175	28.008	30	15.9282	26.5872	100000	100000	15338.6
6.6	56.6603	0	0	29.5985	-0.648178	34.8987	28.5198	30	16.2191	27.0719	100000	100000	16802.4
6.65	57.6354	0	0	29.2436	-0.659878	34.6793	29.0346	30	16.5116	27.5594	100000	100000	18406
6.7	58.6157	0	0	28.8868	-0.671642	34.4594	29.5523	30	16.8057	28.0496	100000	100000	20162.5
6.75	59.6009	0	0	28.5282	-0.683465	34.2392	30.0724	30	17.1012	28.5422	100000	100000	22086.7
6.8	60.5906	0	0	28.1679	-0.695341	34.0188	30.595	30	17.3981	29.037	100000	100000	24194.5
6.85	61.5844	0	0	27.8061	-0.707267	33.7981	31.1198	30	17.6963	29.534	100000	100000	26503.5
6.9	62.582	0	0	27.443	-0.719238	33.5775	31.6465	30	17.9956	30.0327	100000	100000	29032.8
6.95	63.5829	0	0	27.0787	-0.731248	33.3568	32.1749	30	18.2958	30.5332	100000	100000	31803.5
7	64.5867	0	0	26.7133	-0.743294	33.1363	32.7049	30	18.597	31.0351	100000	100000	34838.6
7.05	65.5929	0	0	26.3471	-0.755369	32.9161	33.2362	30	18.8988	31.5382	100000	100000	38163.4
7.1	66.6013	0	0	25.98	-0.767469	32.6961	33.7686	30	19.2014	32.0424	100000	100000	41805.4
7.15	67.6113	0	0	25.6124	-0.779589	32.4767	34.3019	30	19.5043	32.5474	100000	100000	45795
7.2	68.6225	0	0	25.2443	-0.791724	32.2577	34.8358	30	19.8077	33.053	100000	100000	50165.4
7.25	69.6345	0	0	24.8759	-0.803868	32.0394	35.3702	30	20.1113	33.559	100000	100000	54952.9
7.3	70.6468	0	0	24.5074	-0.816016	31.8218	35.9047	30	20.415	34.0651	100000	100000	60197.2
7.35	71.6591	0	0	24.139	-0.828163	31.6051	36.4392	30	20.7187	34.5713	100000	100000	65942.1
7.4	72.6708	0	0	23.7707	-0.840304	31.3893	36.9734	30	21.0222	35.0772	100000	100000	72235.1
7.45	73.6816	0	0	23.4028	-0.852433	31.1744	37.5071	30	21.3255	35.5825	100000	100000	79128.8
7.5	74.691	0	0	23.0353	-0.864546	30.9607	38.04	30	21.6283	36.0873	100000	100000	86680.3
7.55	75.6986	0	0	22.6686	-0.876637	30.7482	38.572	30	21.9306	36.591	100000	100000	94952.5
7.6	76.7039	0	0	22.3026	-0.888701	30.537	39.1029	30	22.2321	37.0937	100000	100000	100003
7.65	77.7066	0	0	21.9377	-0.900733	30.3272	39.6322	30	22.5329	37.595	100000	100000	100003
7.7	78.7061	0	0	21.5739	-0.912727	30.1188	40.16	30	22.8328	38.0948	100000	100000	100003
7.75	79.702	0	0	21.2113	-0.924678	29.9119	40.6858	30	23.1316	38.5927	100000	100000	100003
7.8	80.6941	0	0	20.8502	-0.936583	29.7067	41.2096	30	23.4292	39.0888	100000	100000	100003
7.85	81.6818	0	0	20.4907	-0.948436	29.5031	41.7312	30	23.7255	39.5826	100000	100000	100003
7.9	82.6648	0	0	20.1329	-0.960231	29.3013	42.2502	30	24.0204	40.0741	100000	100000	100003
7.95	83.6427	0	0	19.777	-0.971966	29.1014	42.7665	30	24.3138	40.5631	100000	100000	100003
8	84.615	0	0	19.423	-0.983634	28.9033	43.2799	30	24.6055	41.0492	100000	100000	100003
8.05	85.5814	0	0	19.0712	-0.995231	28.7072	43.7902	30	24.8954	41.5324	100000	100000	100003
8.1	86.5416	0	0	18.7217	-1.00675	28.5131	44.2971	30	25.1834	42.0125	100000	100000	100003
8.15	87.4951	0	0	18.3747	-1.0182	28.3212	44.8006	30	25.4695	42.4893	100000	100000	100003
8.2	88.4417	0	0	18.0301	-1.02955	28.1313	45.3004	30	25.7535	42.9626	100000	100000	100003
8.25	89.3809	0	0	17.6882	-1.04082	27.9437	45.7963	30	26.0352	43.4322	100000	100000	100003
8.3	90.3125	0	0	17.3491	-1.052	27.7583	46.2881	30	26.3147	43.898	100000	100000	100003
8.35	91.2361	0	0	17.013	-1.06309	27.5752	46.7758	30	26.5918	44.3598	100000	100000	100003
8.4	92.1514	0	0	16.6798	-1.07407	27.3944	47.2591	30	26.8664	44.8174	100000	100000	100003
8.45	93.0582	0	0	16.3497	-1.08495	27.216	47.7379	30	27.1384	45.2708	100000	100000	100003
8.5	93.9561	0	0	16.0229	-1.09573	27.04	48.212	30	27.4078	45.7198	100000	100000	100003
8.55	94.8449	0	0	15.6994	-1.10639	26.8665	48.6813	30	27.6744	46.1642	100000	100000	100003
8.6	95.7243	0	0	15.3792	-1.11695	26.6955	49.1456	30	27.9383	46.6039	100000	100000	100003
8.65	96.5941	0	0	15.0626	-1.12738	26.5269	49.6049	30	28.1992	47.0388	100000	100000	100003
8.7	97.4541	0	0	14.7496	-1.1377	26.3609	50.0589	30	28.4572	47.4688	100000	100000	100003
8.75	98.304	0	0	14.4402	-1.1479	26.1974	50.5077	30	28.7122	47.8937	100000	100000	100003
8.8	99.1437	0	0	14.1346	-1.15798	26.0365	50.951	30	28.9641	48.3136	100000	100000	100003
8.85	99.9729	0	0	13.8327	-1.16793	25.8781	51.3889	30	29.2128	48.7282	100000	100000	100003
8.9	100.792	0	0	13.5348	-1.17775	25.7224	51.8211	30	29.4584	49.1375	100000	100000	100003
8.95	101.599	0	0	13.2407	-1.18745	25.5693	52.2476	30	29.7008	49.5414	100000	100000	100003
9	102.396	0	0	12.9507	-1.19701	25.4187	52.6684	30	29.9398	49.9398	100000	100000	100003
9.05	103.182	0	0	12.6646	-1.20644	25.2708	53.0833	30	30.1756	50.3327	100000	100000	100003
9.1	103.957	0	0	12.3826	-1.21573	25.1255	53.4923	30	30.408	50.7201	100000	100000	100003
9.15	104.72	0	0	12.1048	-1.22489	24.9829	53.8953	30	30.637	51.1017	100000	100000	100003
9.2	105.472	0	0	11.8311	-1.23392	24.8428	54.2924	30	30.8626	51.4777	100000	100000	100003
9.25	106.212	0	0	11.5616	-1.2428	24.7053	54.6833	30	31.0847	51.8479	100000	100000	100003
9.3	106.941	0	0	11.2962	-1.25155	24.5705	55.0682	30	31.3034	52.2124	100000	100000	100003
9.35	107.659	0	0	11.0352	-1.26016	24.4382	55.4469	30	31.5185	52.571	100000	100000	100003
9.4	108.364	0	0	10.7783	-1.26862	24.3085	55.8195	30	31.7302	52.9238	100000	100000	100003
9.45	109.058	0	0	10.5257	-1.27695	24.1813	56.1859	30	31.9384	53.2708	100000	100000	100003
9.5	109.74	0	0	10.2774	-1.28514	24.0567	56.5461	30	32.1431	53.6119	100000	100000	100003
9.55	110.411	0	0	10.0333	-1.29318	23.9347	56.9001	30	32.3442	53.9472	100000	100000	100003
9.6	111.07	0	0	9.79351	-1.30109	23.8151	57.248	30	32.5419	54.2766	100000	100000	100003
9.65	111.717	0	0	9.55797	-1.30886	23.698	57.5896	30	32.736	54.6001	100000	100000	100003
9.7	112.352	0	0	9.32669	-1.31648	23.5834	57.9251	30	32.9266	54.9178	100000	100000	100003
9.75	112.976	0	0	9.09965	-1.32396	23.4712	58.2545	30	33.1137	55.2297	100000	100000	100003
9.8	113.588	0	0	8.87684	-1.33131	23.3614	58.5776	30	33.2974	55.5357	100000	100000	100003
9.85	114.189	0	0	8.65825	-1.33852	23.2541	58.8947	30	33.4775	55.836	100000	100000	100003
9.9	114.778	0	0	8.44385	-1.34558	23.149	59.2057	30	33.6542	56.1305	100000	100000	100003
9.95	115.355	0	0	8.23363	-1.35251	23.0464	59.5107	30	33.8275	56.4193	100000	100000	100003
10	115.921	0	0	8.02755	-1.35931	22.946	59.8096	30	33.9973	56.7024	100000	100000	100003
10.05	116.476	0	0	7.82559	-1.36597	22.8479	60.1025	30	34.1638	56.9798	100000	100000	100003
10.1	117.02	0	0	7.62772	-1.37249	22.752	60.3896	30	34.3269	57.2516	100000	100000	100003
10.15	117.552	0	0	7.4339	-1.37888	22.6583	60.6707	30	34.4866	57.5178	100000	100000	100003
10.2	118.074	0	0	7.2441	-1.38514	22.5668	60.946	30	34.643	57.7785	100000	100000	100003
10.25	118.584	0	0	7.05828	-1.39126	22.4775	61.2156	30	34.7962	58.0338	100000	100000	100003
10.3	119.084	0	0	6.87639	-1.39726	22.3902	61.4794	30	34.9461	58.2836	100000	100000	100003
10.35	119.573	0	0	6.69841	-1.40313	22.3051	61.7376	30	35.0928	58.5281	100000	100000	100003
10.4	120.051	0	0	6.52429	-1.40887	22.222	61.9901	30	35.2363	58.7673	100000	100000	100003
10.45	120.519	0	0	6.35397	-1.41448	22.1409	62.2372	30	35.3767	59.0012	100000	100000	100003
10.5	120.977	0	0	6.18741	-1.41997	22.0617	62.4788	30	35.5139	59.23	100000	100000	100003
10.55	121.424	0	0	6.02456	-1.42534	21.9845	62.715	30	35.6482	59.4537	100000	100000	100003
10.6	121.861	0	0	5.86538	-1.43059	21.9093	62.9459	30	35.7793	59.6724	100000	100000	100003
10.65	122.289	0	0	5.70982	-1.43572	21.8358	63.1716	30	35.9076	59.8861	100000	100000	100003
10.7	122.706	0	0	5.55782	-1.44073	21.7642	63.3921	30	36.0328	60.0948	100000	100000	100003
10.75	123.114	0	0	5.40932	-1.44562	21.6945	63.6075	30	36.1552	60.2988	100000	100000	100003
10.8	123.513	0	0	5.26428	-1.45041	21.6264	63.8178	30	36.2748	60.4981	100000	100000	100003
10.85	123.902	0	0	5.12265	-1.45507	21.5601	64.0233	30	36.3915	60.6926	100000	100000	100003
10.9	124.282	0	0	4.98436	-1.45963	21.4955	64.2239	30	36.5055	60.8826	100000	100000	100003
10.95	124.653	0	0	4.84937	-1.46408	21.4326	64.4197	30	36.6167	61.068	100000	100000	100003
11	125.014	0	0	4.71762	-1.46843	21.3712	64.6108	30	36.7253	61.249	100000	100000	100003
11.05	125.368	0	0	4.58905	-1.47267	21.3115	64.7973	30	36.8313	61.4256	100000	100000	100003
11.1	125.712	0	0	4.46361	-1.4768	21.2533	64.9793	30	36.9347	61.5979	100000	100000	100003
11.15	126.048	0	0	4.34124	-1.48084	21.1967	65.1568	30	37.0355	61.766	100000	100000	100003
11.2	126.376	0	0	4.22189	-1.48477	21.1415	65.3299	30	37.1339	61.9299	100000	100000	100003
11.25	126.696	0	0	4.10549	-1.48861	21.0878	65.4987	30	37.2298	62.0898	100000	100000	100003
11.3	127.008	0	0	3.992	-1.49235	21.0355	65.6633	30	37.3233	62.2457	100000	100000	100003
11.35	127.312	0	0	3.88137	-1.496	20.9846	65.8238	30	37.4145	62.3977	100000	100000	100003
11.4	127.608	0	0	3.77352	-1.49955	20.9351	65.9803	30	37.5034	62.5458	100000	100000	100003
11.45	127.897	0	0	3.66841	-1.50302	20.8869	66.1327	30	37.59	62.6902	100000	100000	100003
11.5	128.178	0	0	3.56598	-1.50639	20.84	66.2813	30	37.6745	62.8309	100000	100000	100003
11.55	128.452	0	0	3.46618	-1.50968	20.7944	66.4261	30	37.7567	62.968	100000	100000	100003
11.6	128.72	0	0	3.36895	-1.51289	20.75	66.5671	30	37.8368	63.1015	100000	100000	100003
11.65	128.98	0	0	3.27424	-1.51601	20.7068	66.7045	30	37.9149	63.2316	100000	100000	100003
11.7	129.233	0	0	3.18199	-1.51905	20.6648	66.8383	30	37.9909	63.3583	100000	100000	100003
11.75	129.48	0	0	3.09216	-1.52201	20.6239	66.9686	30	38.065	63.4817	100000	100000	100003
11.8	129.72	0	0	3.00468	-1.5249	20.5842	67.0955	30	38.1371	63.6019	100000	100000	100003
11.85	129.954	0	0	2.91951	-1.52771	20.5456	67.2191	30	38.2073	63.7189	100000	100000	100003
11.9	130.182	0	0	2.83659	-1.53044	20.508	67.3393	30	38.2756	63.8328	100000	100000	100003
11.95	130.404	0	0	2.75588	-1.5331	20.4715	67.4564	30	38.3421	63.9437	100000	100000	100003
12	130.62	0	0	2.67732	-1.53569	20.436	67.5704	30	38.4069	64.0516	100000	100000	100003
12.05	130.83	0	0	2.60087	-1.53821	20.4015	67.6813	30	38.4699	64.1566	100000	100000	100003
12.1	131.034	0	0	2.52647	-1.54066	20.3679	67.7892	30	38.5312	64.2588	100000	100000	100003
12.15	131.233	0	0	2.45408	-1.54305	20.3353	67.8942	30	38.5909	64.3582	100000	100000	100003
12.2	131.426	0	0	2.38365	-1.54537	20.3036	67.9963	30	38.6489	64.455	100000	100000	100003
12.25	131.615	0	0	2.31513	-1.54763	20.2728	68.0957	30	38.7054	64.5491	100000	100000	100003
12.3	131.798	0	0	2.24848	-1.54983	20.2429	68.1924	30	38.7603	64.6406	100000	100000	100003
12.35	131.976	0	0	2.18365	-1.55196	20.2138	68.2864	30	38.8137	64.7297	100000	100000	100003
12.4	132.149	0	0	2.12061	-1.55404	20.1855	68.3779	30	38.8657	64.8163	100000	100000	100003
12.45	132.318	0	0	2.05929	-1.55606	20.158	68.4668	30	38.9162	64.9005	100000	100000	100003
12.5	132.481	0	0	1.99967	-1.55803	20.1314	68.5533	30	38.9654	64.9824	100000	100000	100003
12.55	132.641	0	0	1.9417	-1.55994	20.1054	68.6374	30	39.0132	65.062	100000	100000	100003
12.6	132.795	0	0	1.88533	-1.5618	20.0802	68.7192	30	39.0596	65.1395	100000	100000	100003
12.65	132.946	0	0	1.83054	-1.56361	20.0558	68.7987	30	39.1048	65.2147	100000	100000	100003
12.7	133.092	0	0	1.77727	-1.56536	20.032	68.8759	30	39.1487	65.2879	100000	100000	100003
12.75	133.235	0	0	1.72549	-1.56707	20.0089	68.951	30	39.1913	65.359	100000	100000	100003
12.8	133.373	0	0	1.67516	-1.56873	19.9865	69.024	30	39.2328	65.4282	100000	100000	100003
12.85	133.507	0	0	1.62625	-1.57034	19.9648	69.095	30	39.2731	65.4954	100000	100000	100003
12.9	133.638	0	0	1.57871	-1.57191	19.9436	69.1639	30	39.3123	65.5607	100000	100000	100003
12.95	133.765	0	0	1.53252	-1.57343	19.9231	69.231	30	39.3504	65.6241	100000	100000	100003
13	133.888	0	0	1.48763	-1.57491	19.9032	69.2961	30	39.3874	65.6858	100000	100000	100003
13.05	134.008	0	0	1.44401	-1.57635	19.8838	69.3593	30	39.4233	65.7457	100000	100000	100003
13.1	134.124	0	0	1.40163	-1.57775	19.865	69.4208	30	39.4583	65.8039	100000	100000	100003
13.15	134.237	0	0	1.36045	-1.5791	19.8467	69.4805	30	39.4922	65.8605	100000	100000	100003
13.2	134.347	0	0	1.32045	-1.58042	19.829	69.5386	30	39.5252	65.9154	100000	100000	100003
13.25	134.454	0	0	1.28159	-1.5817	19.8118	69.5949	30	39.5572	65.9688	100000	100000	100003
13.3	134.558	0	0	1.24385	-1.58295	19.7951	69.6497	30	39.5883	66.0206	100000	100000	100003
13.35	134.659	0	0	1.20718	-1.58416	19.7789	69.7029	30	39.6185	66.071	100000	100000	100003
13.4	134.756	0	0	1.17157	-1.58533	19.7632	69.7545	30	39.6479	66.1199	100000	100000	100003
13.45	134.851	0	0	1.13698	-1.58647	19.7479	69.8047	30	39.6764	66.1674	100000	100000	100003
13.5	134.944	0	0	1.10339	-1.58758	19.733	69.8534	30	39.7041	66.2136	100000	100000	100003
13.55	135.033	0	0	1.07076	-1.58865	19.7186	69.9008	30	39.731	66.2584	100000	100000	100003
13.6	135.12	0	0	1.03908	-1.5897	19.7047	69.9467	30	39.7571	66.3019	100000	100000	100003
13.65	135.205	0	0	1.00831	-1.59071	19.6911	69.9913	30	39.7824	66.3442	100000	100000	100003
13.7	135.287	0	0	0.978436	-1.5917	19.6779	70.0347	30	39.807	66.3852	100000	100000	100003
13.75	135.367	0	0	0.949427	-1.59265	19.6651	70.0768	30	39.831	66.4251	100000	100000	100003
13.8	135.444	0	0	0.92126	-1.59358	19.6527	70.1176	30	39.8542	66.4637	100000	100000	100003
13.85	135.519	0	0	0.893912	-1.59448	19.6407	70.1573	30	39.8767	66.5013	100000	100000	100003
13.9	135.592	0	0	0.86736	-1.59536	19.629	70.1958	30	39.8986	66.5378	100000	100000	100003
13.95	135.663	0	0	0.841582	-1.59621	19.6177	70.2332	30	39.9198	66.5732	100000	100000	100003
14	135.732	0	0	0.816556	-1.59703	19.6067	70.2695	30	39.9405	66.6076	100000	100000	100003
14.05	135.798	0	0	0.792261	-1.59783	19.596	70.3047	30	39.9605	66.6409	100000	100000	100003
14.1	135.863	0	0	0.768676	-1.59861	19.5856	70.3389	30	39.9799	66.6733	100000	100000	100003
14.15	135.926	0	0	0.745782	-1.59937	19.5756	70.3722	30	39.9988	66.7048	100000	100000	100003
14.2	135.987	0	0	0.723558	-1.6001	19.5658	70.4044	30	40.0171	66.7353	100000	100000	100003
14.25	136.046	0	0	0.701986	-1.60081	19.5564	70.4357	30	40.0349	66.7649	100000	100000	100003
14.3	136.104	0	0	0.681048	-1.6015	19.5472	70.4661	30	40.0521	66.7937	100000	100000	100003
14.35	136.16	0	0	0.660725	-1.60217	19.5383	70.4955	30	40.0689	66.8216	100000	100000	100003
14.4	136.214	0	0	0.640999	-1.60282	19.5296	70.5241	30	40.0852	66.8487	100000	100000	100003
14.45	136.267	0	0	0.621855	-1.60345	19.5212	70.5519	30	40.1009	66.875	100000	100000	100003
14.5	136.318	0	0	0.603274	-1.60407	19.5131	70.5789	30	40.1162	66.9005	100000	100000	100003
14.55	136.367	0	0	0.585241	-1.60466	19.5052	70.605	30	40.1311	66.9253	100000	100000	100003
14.6	136.415	0	0	0.567741	-1.60524	19.4975	70.6304	30	40.1455	66.9493	100000	100000	100003
14.65	136.462	0	0	0.550757	-1.6058	19.4901	70.655	30	40.1595	66.9727	100000	100000	100003
14.7	136.507	0	0	0.534276	-1.60634	19.4828	70.679	30	40.1731	66.9953	100000	100000	100003
14.75	136.551	0	0	0.518282	-1.60687	19.4758	70.7022	30	40.1863	67.0173	100000	100000	100003
14.8	136.594	0	0	0.502761	-1.60738	19.4691	70.7247	30	40.1991	67.0386	100000	100000	100003
14.85	136.635	0	0	0.4877	-1.60788	19.4625	70.7465	30	40.2115	67.0593	100000	100000	100003
14.9	136.675	0	0	0.473086	-1.60836	19.4561	70.7677	30	40.2235	67.0794	100000	100000	100003
14.95	136.714	0	0	0.458905	-1.60882	19.4499	70.7883	30	40.2352	67.0988	100000	100000	100003
15	136.752	0	0	0.445145	-1.60928	19.4439	70.8082	30	40.2466	67.1177	100000	100000	100003
15.05	136.789	0	0	0.431794	-1.60972	19.438	70.8276	30	40.2576	67.1361	100000	100000	100003
15.1	136.824	0	0	0.41884	-1.61015	19.4324	70.8464	30	40.2683	67.1539	100000	100000	100003
15.15	136.859	0	0	0.406271	-1.61056	19.4269	70.8646	30	40.2786	67.1711	100000	100000	100003
15.2	136.892	0	0	0.394076	-1.61096	19.4215	70.8823	30	40.2887	67.1879	100000	100000	100003
15.25	136.925	0	0	0.382243	-1.61135	19.4164	70.8995	30	40.2984	67.2042	100000	100000	100003
15.3	136.956	0	0	0.370764	-1.61173	19.4114	70.9161	30	40.3079	67.2199	100000	100000	100003
15.35	136.987	0	0	0.359626	-1.6121	19.4065	70.9323	30	40.3171	67.2352	100000	100000	100003
15.4	137.017	0	0	0.34882	-1.61245	19.4018	70.948	30	40.326	67.2501	100000	100000	100003
15.45	137.045	0	0	0.338336	-1.6128	19.3972	70.9632	30	40.3346	67.2645	100000	100000	100003
15.5	137.073	0	0	0.328166	-1.61313	19.3928	70.9779	30	40.343	67.2784	100000	100000	100003
15.55	137.101	0	0	0.318299	-1.61346	19.3885	70.9922	30	40.3511	67.292	100000	100000	100003
15.6	137.127	0	0	0.308726	-1.61378	19.3843	71.0061	30	40.359	67.3051	100000	100000	100003
15.65	137.152	0	0	0.29944	-1.61408	19.3802	71.0196	30	40.3667	67.3179	100000	100000	100003
15.7	137.177	0	0	0.290431	-1.61438	19.3763	71.0327	30	40.3741	67.3303	100000	100000	100003
15.75	137.201	0	0	0.281691	-1.61467	19.3725	71.0453	30	40.3813	67.3423	100000	100000	100003
15.8	137.224	0	0	0.273213	-1.61495	19.3688	71.0576	30	40.3883	67.3539	100000	100000	100003
15.85	137.247	0	0	0.264988	-1.61522	19.3652	71.0696	30	40.3951	67.3652	100000	100000	100003
15.9	137.269	0	0	0.257009	-1.61548	19.3617	71.0811	30	40.4016	67.3762	100000	100000	100003
15.95	137.29	0	0	0.249269	-1.61574	19.3583	71.0924	30	40.408	67.3868	100000	100000	100003
16	137.311	0	0	0.241761	-1.61598	19.3551	71.1033	30	40.4142	67.3971	100000	100000	100003
16.05	137.331	0	0	0.234478	-1.61622	19.3519	71.1138	30	40.4202	67.4071	100000	100000	100003
16.1	137.35	0	0	0.227414	-1.61646	19.3488	71.1241	30	40.426	67.4168	100000	100000	100003
16.15	137.369	0	0	0.220561	-1.61668	19.3458	71.134	30	40.4317	67.4262	100000	100000	100003
16.2	137.387	0	0	0.213913	-1.6169	19.3429	71.1437	30	40.4372	67.4354	100000	100000	100003
16.25	137.405	0	0	0.207465	-1.61711	19.3401	71.153	30	40.4425	67.4442	100000	100000	100003
16.3	137.422	0	0	0.201211	-1.61732	19.3374	71.1621	30	40.4476	67.4528	100000	100000	100003
16.35	137.439	0	0	0.195144	-1.61752	19.3348	71.1709	30	40.4526	67.4612	100000	100000	100003
16.4	137.455	0	0	0.18926	-1.61771	19.3322	71.1794	30	40.4575	67.4692	100000	100000	100003
16.45	137.471	0	0	0.183552	-1.6179	19.3297	71.1877	30	40.4622	67.4771	100000	100000	100003
16.5	137.486	0	0	0.178016	-1.61808	19.3273	71.1957	30	40.4667	67.4847	100000	100000	100003
16.55	137.501	0	0	0.172646	-1.61826	19.325	71.2035	30	40.4712	67.4921	100000	100000	100003
16.6	137.515	0	0	0.167437	-1.61843	19.3227	71.2111	30	40.4755	67.4992	100000	100000	100003
16.65	137.529	0	0	0.162385	-1.6186	19.3205	71.2184	30	40.4796	67.5062	100000	100000	100003
16.7	137.542	0	0	0.157485	-1.61876	19.3184	71.2255	30	40.4837	67.5129	100000	100000	100003
16.75	137.555	0	0	0.152733	-1.61892	19.3163	71.2324	30	40.4876	67.5194	100000	100000	100003
16.8	137.568	0	0	0.148123	-1.61907	19.3143	71.2391	30	40.4914	67.5257	100000	100000	100003
16.85	137.58	0	0	0.143652	-1.61922	19.3123	71.2456	30	40.4951	67.5319	100000	100000	100003
16.9	137.592	0	0	0.139315	-1.61936	19.3105	71.2519	30	40.4986	67.5378	100000	100000	100003
16.95	137.604	0	0	0.135109	-1.6195	19.3086	71.258	30	40.5021	67.5436	100000	100000	100003
17	137.615	0	0	0.13103	-1.61963	19.3068	71.2639	30	40.5055	67.5492	100000	100000	100003
17.05	137.626	0	0	0.127073	-1.61976	19.3051	71.2696	30	40.5087	67.5547	100000	100000	100003
17.1	137.636	0	0	0.123236	-1.61989	19.3035	71.2752	30	40.5119	67.5599	100000	100000	100003
17.15	137.647	0	0	0.119514	-1.62001	19.3018	71.2806	30	40.515	67.565	100000	100000	100003
17.2	137.657	0	0	0.115904	-1.62013	19.3003	71.2858	30	40.5179	67.57	100000	100000	100003
17.25	137.666	0	0	0.112403	-1.62025	19.2987	71.2909	30	40.5208	67.5748	100000	100000	100003
17.3	137.675	0	0	0.109008	-1.62036	19.2973	71.2958	30	40.5236	67.5795	100000	100000	100003
17.35	137.685	0	0	0.105715	-1.62047	19.2958	71.3006	30	40.5263	67.584	100000	100000	100003
17.4	137.693	0	0	0.102521	-1.62057	19.2944	71.3052	30	40.529	67.5884	100000	100000	100003
17.45	137.702	0	0	0.0994231	-1.62068	19.2931	71.3097	30	40.5315	67.5926	100000	100000	100003
17.5	137.71	0	0	0.0964189	-1.62077	19.2918	71.3141	30	40.534	67.5968	100000	100000	100003
17.55	137.718	0	0	0.0935052	-1.62087	19.2905	71.3183	30	40.5364	67.6008	100000	100000	100003
17.6	137.726	0	0	0.0906795	-1.62096	19.2893	71.3224	30	40.5387	67.6047	100000	100000	100003
17.65	137.733	0	0	0.0879389	-1.62105	19.2881	71.3264	30	40.541	67.6084	100000	100000	100003
17.7	137.741	0	0	0.0852811	-1.62114	19.2869	71.3302	30	40.5432	67.6121	100000	100000	100003
17.75	137.748	0	0	0.0827035	-1.62123	19.2858	71.334	30	40.5453	67.6156	100000	100000	100003
17.8	137.755	0	0	0.0802036	-1.62131	19.2847	71.3376	30	40.5474	67.619	100000	100000	100003
17.85	137.761	0	0	0.0777791	-1.62139	19.2837	71.3411	30	40.5493	67.6224	100000	100000	100003
17.9	137.768	0	0	0.0754278	-1.62147	19.2827	71.3445	30	40.5513	67.6256	100000	100000	100003
17.95	137.774	0	0	0.0731475	-1.62154	19.2817	71.3478	30	40.5532	67.6287	100000	100000	100003
18	137.78	0	0	0.070936	-1.62161	19.2807	71.351	30	40.555	67.6318	100000	100000	100003
18.05	137.786	0	0	0.0687913	-1.62169	19.2798	71.3542	30	40.5568	67.6347	100000	100000	100003
18.1	137.792	0	0	0.0667113	-1.62175	19.2789	71.3572	30	40.5585	67.6376	100000	100000	100003
18.15	137.797	0	0	0.0646941	-1.62182	19.278	71.3601	30	40.5601	67.6403	100000	100000	100003
18.2	137.803	0	0	0.0627378	-1.62189	19.2771	71.3629	30	40.5617	67.643	100000	100000	100003
18.25	137.808	0	0	0.0608406	-1.62195	19.2763	71.3657	30	40.5633	67.6456	100000	100000	100003
18.3	137.813	0	0	0.0590007	-1.62201	19.2755	71.3684	30	40.5648	67.6482	100000	100000	100003
18.35	137.818	0	0	0.0572164	-1.62207	19.2747	71.371	30	40.5663	67.6506	100000	100000	100003
18.4	137.823	0	0	0.0554859	-1.62212	19.274	71.3735	30	40.5677	67.653	100000	100000	100003
18.45	137.827	0	0	0.0538078	-1.62218	19.2733	71.3759	30	40.5691	67.6553	100000	100000	100003
18.5	137.832	0	0	0.0521803	-1.62223	19.2726	71.3783	30	40.5704	67.6575	100000	100000	100003
18.55	137.836	0	0	0.050602	-1.62229	19.2719	71.3805	30	40.5717	67.6597	100000	100000	100003
18.6	137.84	0	0	0.0490714	-1.62234	19.2712	71.3828	30	40.573	67.6618	100000	100000	100003
18.65	137.844	0	0	0.047587	-1.62238	19.2706	71.3849	30	40.5742	67.6638	100000	100000	100003
18.7	137.848	0	0	0.0461475	-1.62243	19.2699	71.387	30	40.5754	67.6658	100000	100000	100003
18.75	137.852	0	0	0.0447515	-1.62248	19.2693	71.389	30	40.5766	67.6677	100000	100000	100003
18.8	137.856	0	0	0.0433977	-1.62252	19.2687	71.391	30	40.5777	67.6696	100000	100000	100003
18.85	137.859	0	0	0.0420848	-1.62257	19.2682	71.3929	30	40.5788	67.6714	100000	100000	100003
18.9	137.863	0	0	0.0408116	-1.62261	19.2676	71.3947	30	40.5798	67.6732	100000	100000	100003
18.95	137.866	0	0	0.0395769	-1.62265	19.2671	71.3965	30	40.5808	67.6748	100000	100000	100003
19	137.87	0	0	0.0383795	-1.62269	19.2666	71.3983	30	40.5818	67.6765	100000	100000	100003
19.05	137.873	0	0	0.0372183	-1.62273	19.2661	71.4	30	40.5828	67.6781	100000	100000	100003
19.1	137.876	0	0	0.0360922	-1.62276	19.2656	71.4016	30	40.5837	67.6796	100000	100000	100003
19.15	137.879	0	0	0.0350001	-1.6228	19.2651	71.4032	30	40.5846	67.6811	100000	100000	100003
19.2	137.882	0	0	0.0339411	-1.62283	19.2646	71.4047	30	40.5855	67.6826	100000	100000	100003
19.25	137.885	0	0	0.0329141	-1.62287	19.2642	71.4062	30	40.5863	67.684	100000	100000	100003
19.3	137.887	0	0	0.0319181	-1.6229	19.2638	71.4076	30	40.5871	67.6854	100000	100000	100003
19.35	137.89	0	0	0.0309523	-1.62293	19.2633	71.409	30	40.5879	67.6867	100000	100000	100003
19.4	137.893	0	0	0.0300156	-1.62296	19.2629	71.4104	30	40.5887	67.688	100000	100000	100003
19.45	137.895	0	0	0.0291073	-1.62299	19.2625	71.4117	30	40.5895	67.6892	100000	100000	100003
19.5	137.897	0	0	0.0282265	-1.62302	19.2621	71.413	30	40.5902	67.6904	100000	100000	100003
19.55	137.9	0	0	0.0273723	-1.62305	19.2618	71.4142	30	40.5909	67.6916	100000	100000	100003
19.6	137.902	0	0	0.0265439	-1.62308	19.2614	71.4154	30	40.5916	67.6927	100000	100000	100003
19.65	137.904	0	0	0.0257406	-1.6231	19.2611	71.4166	30	40.5922	67.6939	100000	100000	100003
19.7	137.906	0	0	0.0249616	-1.62313	19.2607	71.4177	30	40.5929	67.6949	100000	100000	100003
19.75	137.908	0	0	0.0242061	-1.62316	19.2604	71.4188	30	40.5935	67.696	100000	100000	100003
19.8	137.91	0	0	0.0234735	-1.62318	19.2601	71.4199	30	40.5941	67.697	100000	100000	100003
19.85	137.912	0	0	0.0227631	-1.6232	19.2598	71.4209	30	40.5947	67.6979	100000	100000	100003
19.9	137.914	0	0	0.0220741	-1.62323	19.2595	71.4219	30	40.5953	67.6989	100000	100000	100003
19.95	137.916	0	0	0.021406	-1.62325	19.2592	71.4229	30	40.5958	67.6998	100000	100000	100003
20	137.918	0	0	0.0207581	-1.62327	19.2589	71.4238	30	40.5963	67.7007	100000	100000	100003
20.05	137.92	0	0	0.0201298	-1.62329	19.2586	71.4247	30	40.5969	67.7016	100000	100000	100003
20.1	137.921	0	0	0.0195205	-1.62331	19.2584	71.4256	30	40.5974	67.7024	100000	100000	100003
20.15	137.923	0	0	0.0189297	-1.62333	19.2581	71.4265	30	40.5979	67.7032	100000	100000	100003
20.2	137.925	0	0	0.0183567	-1.62335	19.2579	71.4273	30	40.5983	67.704	100000	100000	100003
20.25	137.926	0	0	0.0178011	-1.62337	19.2576	71.4281	30	40.5988	67.7048	100000	100000	100003
20.3	137.928	0	0	0.0172623	-1.62338	19.2574	71.4289	30	40.5992	67.7055	100000	100000	100003
20.35	137.929	0	0	0.0167397	-1.6234	19.2572	71.4297	30	40.5997	67.7062	100000	100000	100003
20.4	137.93	0	0	0.016233	-1.62342	19.2569	71.4304	30	40.6001	67.7069	100000	100000	100003
20.45	137.932	0	0	0.0157417	-1.62343	19.2567	71.4311	30	40.6005	67.7076	100000	100000	100003
20.5	137.933	0	0	0.0152651	-1.62345	19.2565	71.4318	30	40.6009	67.7082	100000	100000	100003
20.55	137.934	0	0	0.0148031	-1.62347	19.2563	71.4325	30	40.6013	67.7089	100000	100000	100003
20.6	137.936	0	0	0.0143549	-1.62348	19.2561	71.4331	30	40.6016	67.7095	100000	100000	100003
20.65	137.937	0	0	0.0139204	-1.62349	19.2559	71.4338	30	40.602	67.7101	100000	100000	100003
20.7	137.938	0	0	0.013499	-1.62351	19.2558	71.4344	30	40.6023	67.7107	100000	100000	100003
20.75	137.939	0	0	0.0130904	-1.62352	19.2556	71.435	30	40.6027	67.7112	100000	100000	100003
20.8	137.94	0	0	0.0126941	-1.62353	19.2554	71.4355	30	40.603	67.7118	100000	100000	100003
20.85	137.941	0	0	0.0123098	-1.62355	19.2552	71.4361	30	40.6033	67.7123	100000	100000	100003
20.9	137.942	0	0	0.0119372	-1.62356	19.2551	71.4366	30	40.6036	67.7128	100000	100000	100003
20.95	137.943	0	0	0.0115758	-1.62357	19.2549	71.4372	30	40.6039	67.7133	100000	100000	100003
21	137.944	0	0	0.0112253	-1.62358	19.2548	71.4377	30	40.6042	67.7138	100000	100000	100003
21.05	137.945	0	0	0.0108855	-1.62359	19.2546	71.4382	30	40.6045	67.7143	100000	100000	100003
21.1	137.946	0	0	0.010556	-1.62361	19.2545	71.4386	30	40.6048	67.7147	100000	100000	100003
21.15	137.947	0	0	0.0102364	-1.62362	19.2543	71.4391	30	40.605	67.7151	100000	100000	100003
21.2	137.948	0	0	0.0099265	-1.62363	19.2542	71.4395	30	40.6053	67.7156	100000	100000	100003
21.25	137.949	0	0	0.00962598	-1.62364	19.2541	71.44	30	40.6055	67.716	100000	100000	100003
21.3	137.949	0	0	0.00933456	-1.62365	19.2539	71.4404	30	40.6058	67.7164	100000	100000	100003
21.35	137.95	0	0	0.00905196	-1.62365	19.2538	71.4408	30	40.606	67.7168	100000	100000	100003
21.4	137.951	0	0	0.00877791	-1.62366	19.2537	71.4412	30	40.6062	67.7172	100000	100000	100003
21.45	137.952	0	0	0.00851216	-1.62367	19.2536	71.4416	30	40.6064	67.7175	100000	100000	100003
21.5	137.952	0	0	0.00825445	-1.62368	19.2535	71.442	30	40.6066	67.7179	100000	100000	100003
21.55	137.953	0	0	0.00800455	-1.62369	19.2534	71.4423	30	40.6069	67.7182	100000	100000	100003
21.6	137.954	0	0	0.0077622	-1.6237	19.2533	71.4427	30	40.6071	67.7185	100000	100000	100003
21.65	137.954	0	0	0.0075272	-1.62371	19.2532	71.443	30	40.6072	67.7189	100000	100000	100003
21.7	137.955	0	0	0.0072993	-1.62371	19.2531	71.4434	30	40.6074	67.7192	100000	100000	100003
21.75	137.956	0	0	0.00707831	-1.62372	19.253	71.4437	30	40.6076	67.7195	100000	100000	100003
21.8	137.956	0	0	0.00686401	-1.62373	19.2529	71.444	30	40.6078	67.7198	100000	100000	100003
21.85	137.957	0	0	0.00665619	-1.62373	19.2528	71.4443	30	40.608	67.7201	100000	100000	100003
21.9	137.957	0	0	0.00645466	-1.62374	19.2527	71.4446	30	40.6081	67.7203	100000	100000	100003
21.95	137.958	0	0	0.00625924	-1.62375	19.2526	71.4449	30	40.6083	67.7206	100000	100000	100003
22	137.958	0	0	0.00606973	-1.62375	19.2525	71.4451	30	40.6085	67.7209	100000	100000	100003
22.05	137.959	0	0	0.00588596	-1.62376	19.2524	71.4454	30	40.6086	67.7211	100000	100000	100003
22.1	137.959	0	0	0.00570775	-1.62377	19.2524	71.4457	30	40.6087	67.7214	100000	100000	100003
22.15	137.96	0	0	0.00553494	-1.62377	19.2523	71.4459	30	40.6089	67.7216	100000	100000	100003
22.2	137.96	0	0	0.00536735	-1.62378	19.2522	71.4462	30	40.609	67.7218	100000	100000	100003
22.25	137.961	0	0	0.00520484	-1.62378	19.2521	71.4464	30	40.6092	67.7221	100000	100000	100003
22.3	137.961	0	0	0.00504725	-1.62379	19.2521	71.4466	30	40.6093	67.7223	100000	100000	100003
22.35	137.962	0	0	0.00489444	-1.62379	19.252	71.4468	30	40.6094	67.7225	100000	100000	100003
22.4	137.962	0	0	0.00474625	-1.6238	19.2519	71.4471	30	40.6095	67.7227	100000	100000	100003
22.45	137.962	0	0	0.00460254	-1.6238	19.2519	71.4473	30	40.6097	67.7229	100000	100000	100003
22.5	137.963	0	0	0.00446318	-1.62381	19.2518	71.4475	30	40.6098	67.7231	100000	100000	100003
22.55	137.963	0	0	0.00432805	-1.62381	19.2518	71.4477	30	40.6099	67.7233	100000	100000	100003
22.6	137.963	0	0	0.00419701	-1.62381	19.2517	71.4479	30	40.61	67.7234	100000	100000	100003
22.65	137.964	0	0	0.00406993	-1.62382	19.2517	71.448	30	40.6101	67.7236	100000	100000	100003
22.7	137.964	0	0	0.0039467	-1.62382	19.2516	71.4482	30	40.6102	67.7238	100000	100000	100003
22.75	137.964	0	0	0.0038272	-1.62383	19.2516	71.4484	30	40.6103	67.724	100000	100000	100003
22.8	137.965	0	0	0.00371132	-1.62383	19.2515	71.4486	30	40.6104	67.7241	100000	100000	100003
22.85	137.965	0	0	0.00359895	-1.62383	19.2515	71.4487	30	40.6105	67.7243	100000	100000	100003
22.9	137.965	0	0	0.00348998	-1.62384	19.2514	71.4489	30	40.6106	67.7244	100000	100000	100003
22.95	137.966	0	0	0.0033843	-1.62384	19.2514	71.449	30	40.6107	67.7246	100000	100000	100003
23	137.966	0	0	0.00328183	-1.62385	19.2513	71.4492	30	40.6107	67.7247	100000	100000	100003
23.05	137.966	0	0	0.00318246	-1.62385	19.2513	71.4493	30	40.6108	67.7248	100000	100000	100003
23.1	137.966	0	0	0.0030861	-1.62385	19.2512	71.4495	30	40.6109	67.725	100000	100000	100003
23.15	137.967	0	0	0.00299266	-1.62385	19.2512	71.4496	30	40.611	67.7251	100000	100000	100003
23.2	137.967	0	0	0.00290204	-1.62386	19.2511	71.4497	30	40.6111	67.7252	100000	100000	100003
23.25	137.967	0	0	0.00281417	-1.62386	19.2511	71.4499	30	40.6111	67.7253	100000	100000	100003
23.3	137.967	0	0	0.00272896	-1.62386	19.2511	71.45	30	40.6112	67.7255	100000	100000	100003
23.35	137.968	0	0	0.00264633	-1.62387	19.251	71.4501	30	40.6113	67.7256	100000	100000	100003
23.4	137.968	0	0	0.0025662	-1.62387	19.251	71.4502	30	40.6113	67.7257	100000	100000	100003
23.45	137.968	0	0	0.0024885	-1.62387	19.251	71.4503	30	40.6114	67.7258	100000	100000	100003
23.5	137.968	0	0	0.00241315	-1.62387	19.2509	71.4504	30	40.6115	67.7259	100000	100000	100003
23.55	137.969	0	0	0.00234008	-1.62388	19.2509	71.4506	30	40.6115	67.726	100000	100000	100003
23.6	137.969	0	0	0.00226923	-1.62388	19.2509	71.4507	30	40.6116	67.7261	100000	100000	100003
23.65	137.969	0	0	0.00220052	-1.62388	19.2508	71.4508	30	40.6116	67.7262	100000	100000	100003
23.7	137.969	0	0	0.00213389	-1.62388	19.2508	71.4509	30	40.6117	67.7263	100000	100000	100003
23.75	137.969	0	0	0.00206928	-1.62389	19.2508	71.4509	30	40.6117	67.7264	100000	100000	100003
23.8	137.969	0	0	0.00200662	-1.62389	19.2508	71.451	30	40.6118	67.7265	100000	100000	100003
23.85	137.97	0	0	0.00194586	-1.62389	19.2507	71.4511	30	40.6118	67.7265	100000	100000	100003
23.9	137.97	0	0	0.00188694	-1.62389	19.2507	71.4512	30	40.6119	67.7266	100000	100000	100003
23.95	137.97	0	0	0.0018298	-1.62389	19.2507	71.4513	30	40.6119	67.7267	100000	100000	100003
24	137.97	0	0	0.0017744	-1.62389	19.2507	71.4514	30	40.612	67.7268	100000	100000	100003
24.05	137.97	0	0	0.00172067	-1.6239	19.2506	71.4514	30	40.612	67.7268	100000	100000	100003
24.1	137.97	0	0	0.00166857	-1.6239	19.2506	71.4515	30	40.6121	67.7269	100000	100000	100003
24.15	137.971	0	0	0.00161805	-1.6239	19.2506	71.4516	30	40.6121	67.727	100000	100000	100003
24.2	137.971	0	0	0.00156905	-1.6239	19.2506	71.4517	30	40.6122	67.7271	100000	100000	100003
24.25	137.971	0	0	0.00152154	-1.6239	19.2505	71.4517	30	40.6122	67.7271	100000	100000	100003
24.3	137.971	0	0	0.00147547	-1.6239	19.2505	71.4518	30	40.6122	67.7272	100000	100000	100003
24.35	137.971	0	0	0.00143079	-1.62391	19.2505	71.4519	30	40.6123	67.7272	100000	100000	100003
24.4	137.971	0	0	0.00138747	-1.62391	19.2505	71.4519	30	40.6123	67.7273	100000	100000	100003
24.45	137.971	0	0	0.00134546	-1.62391	19.2505	71.452	30	40.6123	67.7274	100000	100000	100003
24.5	137.971	0	0	0.00130472	-1.62391	19.2505	71.4521	30	40.6124	67.7274	100000	100000	100003
24.55	137.971	0	0	0.00126521	-1.62391	19.2504	71.4521	30	40.6124	67.7275	100000	100000	100003
24.6	137.972	0	0	0.0012269	-1.62391	19.2504	71.4522	30	40.6124	67.7275	100000	100000	100003
24.65	137.972	0	0	0.00118975	-1.62391	19.2504	71.4522	30	40.6125	67.7276	100000	100000	100003
24.7	137.972	0	0	0.00115372	-1.62392	19.2504	71.4523	30	40.6125	67.7276	100000	100000	100003
24.75	137.972	0	0	0.00111879	-1.62392	19.2504	71.4523	30	40.6125	67.7277	100000	100000	100003
24.8	137.972	0	0	0.00108491	-1.62392	19.2504	71.4524	30	40.6126	67.7277	100000	100000	100003
24.85	137.972	0	0	0.00105206	-1.62392	19.2503	71.4524	30	40.6126	67.7278	100000	100000	100003
24.9	137.972	0	0	0.0010202	-1.62392	19.2503	71.4525	30	40.6126	67.7278	100000	100000	100003
24.95	137.972	0	0	0.000989311	-1.62392	19.2503	71.4525	30	40.6126	67.7279	100000	100000	100003
25	137.972	0	0	0.000959355	-1.62392	19.2503	71.4526	30	40.6127	67.7279	100000	100000	100003
25.05	137.972	0	0	0.000930305	-1.62392	19.2503	71.4526	30	40.6127	67.7279	100000	100000	100003
25.1	137.972	0	0	0.000902135	-1.62392	19.2503	71.4526	30	40.6127	67.728	100000	100000	100003
25.15	137.973	0	0	0.000874819	-1.62392	19.2503	71.4527	30	40.6127	67.728	100000	100000	100003
25.2	137.973	0	0	0.000848329	-1.62393	19.2503	71.4527	30	40.6128	67.728	100000	100000	100003
25.25	137.973	0	0	0.000822642	-1.62393	19.2502	71.4528	30	40.6128	67.7281	100000	100000	100003
25.3	137.973	0	0	0.000797732	-1.62393	19.2502	71.4528	30	40.6128	67.7281	100000	100000	100003
25.35	137.973	0	0	0.000773576	-1.62393	19.2502	71.4528	30	40.6128	67.7281	100000	100000	100003
25.4	137.973	0	0	0.000750152	-1.62393	19.2502	71.4529	30	40.6128	67.7282	100000	100000	100003
25.45	137.973	0	0	0.000727437	-1.62393	19.2502	71.4529	30	40.6129	67.7282	100000	100000	100003
25.5	137.973	0	0	0.00070541	-1.62393	19.2502	71.4529	30	40.6129	67.7282	100000	100000	100003
25.55	137.973	0	0	0.00068405	-1.62393	19.2502	71.453	30	40.6129	67.7283	100000	100000	100003
25.6	137.973	0	0	0.000663337	-1.62393	19.2502	71.453	30	40.6129	67.7283	100000	100000	100003
25.65	137.973	0	0	0.000643251	-1.62393	19.2502	71.453	30	40.6129	67.7283	100000	100000	100003
25.7	137.973	0	0	0.000623773	-1.62393	19.2502	71.453	30	40.6129	67.7284	100000	100000	100003
25.75	137.973	0	0	0.000604885	-1.62393	19.2502	71.4531	30	40.613	67.7284	100000	100000	100003
25.8	137.973	0	0	0.000586569	-1.62393	19.2501	71.4531	30	40.613	67.7284	100000	100000	100003
25.85	137.973	0	0	0.000568807	-1.62393	19.2501	71.4531	30	40.613	67.7284	100000	100000	100003
25.9	137.973	0	0	0.000551584	-1.62394	19.2501	71.4531	30	40.613	67.7285	100000	100000	100003
25.95	137.973	0	0	0.000534882	-1.62394	19.2501	71.4532	30	40.613	67.7285	100000	100000	100003
26	137.974	0	0	0.000518685	-1.62394	19.2501	71.4532	30	40.613	67.7285	100000	100000	100003
26.05	137.974	0	0	0.000502979	-1.62394	19.2501	71.4532	30	40.613	67.7285	100000	100000	100003
26.1	137.974	0	0	0.000487749	-1.62394	19.2501	71.4532	30	40.6131	67.7285	100000	100000	100003
26.15	137.974	0	0	0.00047298	-1.62394	19.2501	71.4533	30	40.6131	67.7286	100000	100000	100003
26.2	137.974	0	0	0.000458657	-1.62394	19.2501	71.4533	30	40.6131	67.7286	100000	100000	100003
26.25	137.974	0	0	0.000444769	-1.62394	19.2501	71.4533	30	40.6131	67.7286	100000	100000	100003
26.3	137.974	0	0	0.000431301	-1.62394	19.2501	71.4533	30	40.6131	67.7286	100000	100000	100003
26.35	137.974	0	0	0.000418241	-1.62394	19.2501	71.4533	30	40.6131	67.7286	100000	100000	100003
26.4	137.974	0	0	0.000405577	-1.62394	19.2501	71.4534	30	40.6131	67.7287	100000	100000	100003
26.45	137.974	0	0	0.000393296	-1.62394	19.2501	71.4534	30	40.6131	67.7287	100000	100000	100003
26.5	137.974	0	0	0.000381386	-1.62394	19.2501	71.4534	30	40.6131	67.7287	100000	100000	100003
26.55	137.974	0	0	0.000369838	-1.62394	19.25	71.4534	30	40.6131	67.7287	100000	100000	100003
26.6	137.974	0	0	0.000358639	-1.62394	19.25	71.4534	30	40.6132	67.7287	100000	100000	100003
26.65	137.974	0	0	0.000347779	-1.62394	19.25	71.4534	30	40.6132	67.7287	100000	100000	100003
26.7	137.974	0	0	0.000337248	-1.62394	19.25	71.4535	30	40.6132	67.7287	100000	100000	100003
26.75	137.974	0	0	0.000327036	-1.62394	19.25	71.4535	30	40.6132	67.7288	100000	100000	100003
26.8	137.974	0	0	0.000317133	-1.62394	19.25	71.4535	30	40.6132	67.7288	100000	100000	100003
26.85	137.974	0	0	0.00030753	-1.62394	19.25	71.4535	30	40.6132	67.7288	100000	100000	100003
26.9	137.974	0	0	0.000298218	-1.62394	19.25	71.4535	30	40.6132	67.7288	100000	100000	100003
26.95	137.974	0	0	0.000289188	-1.62394	19.25	71.4535	30	40.6132	67.7288	100000	100000	100003
27	137.974	0	0	0.000280431	-1.62394	19.25	71.4535	30	40.6132	67.7288	100000	100000	100003
27.05	137.974	0	0	0.00027194	-1.62394	19.25	71.4536	30	40.6132	67.7288	100000	100000	100003
27.1	137.974	0	0	0.000263705	-1.62394	19.25	71.4536	30	40.6132	67.7288	100000	100000	100003
27.15	137.974	0	0	0.00025572	-1.62394	19.25	71.4536	30	40.6132	67.7289	100000	100000	100003
27.2	137.974	0	0	0.000247977	-1.62395	19.25	71.4536	30	40.6132	67.7289	100000	100000	100003
27.25	137.974	0	0	0.000240468	-1.62395	19.25	71.4536	30	40.6133	67.7289	100000	100000	100003
27.3	137.974	0	0	0.000233186	-1.62395	19.25	71.4536	30	40.6133	67.7289	100000	100000	100003
27.35	137.974	0	0	0.000226125	-1.62395	19.25	71.4536	30	40.6133	67.7289	100000	100000	100003
27.4	137.974	0	0	0.000219278	-1.62395	19.25	71.4536	30	40.6133	67.7289	100000	100000	100003
27.45	137.974	0	0	0.000212638	-1.62395	19.25	71.4536	30	40.6133	67.7289	100000	100000	100003
27.5	137.974	0	0	0.000206199	-1.62395	19.25	71.4536	30	40.6133	67.7289	100000	100000	100003
27.55	137.974	0	0	0.000199955	-1.62395	19.25	71.4537	30	40.6133	67.7289	100000	100000	100003
27.6	137.974	0	0	0.000193901	-1.62395	19.25	71.4537	30	40.6133	67.7289	100000	100000	100003
27.65	137.974	0	0	0.000188029	-1.62395	19.25	71.4537	30	40.6133	67.729	100000	100000	100003
27.7	137.974	0	0	0.000182336	-1.62395	19.25	71.4537	30	40.6133	67.729	100000	100000	100003
27.75	137.974	0	0	0.000176814	-1.62395	19.25	71.4537	30	40.6133	67.729	100000	100000	100003
27.8	137.974	0	0	0.00017146	-1.62395	19.25	71.4537	30	40.6133	67.729	100000	100000	100003
27.85	137.975	0	0	0.000166268	-1.62395	19.25	71.4537	30	40.6133	67.729	100000	100000	100003
27.9	137.975	0	0	0.000161234	-1.62395	19.25	71.4537	30	40.6133	67.729	100000	100000	100003
27.95	137.975	0	0	0.000156351	-1.62395	19.25	71.4537	30	40.6133	67.729	100000	100000	100003
28	137.975	0	0	0.000151617	-1.62395	19.25	71.4537	30	40.6133	67.729	100000	100000	100003
28.05	137.975	0	0	0.000147026	-1.62395	19.25	71.4537	30	40.6133	67.729	100000	100000	100003
28.1	137.975	0	0	0.000142574	-1.62395	19.25	71.4537	30	40.6133	67.729	100000	100000	100003
28.15	137.975	0	0	0.000138257	-1.62395	19.2499	71.4537	30	40.6133	67.729	100000	100000	100003
28.2	137.975	0	0	0.00013407	-1.62395	19.2499	71.4538	30	40.6133	67.729	100000	100000	100003
28.25	137.975	0	0	0.00013001	-1.62395	19.2499	71.4538	30	40.6133	67.729	100000	100000	100003
28.3	137.975	0	0	0.000126074	-1.62395	19.2499	71.4538	30	40.6133	67.729	100000	100000	100003
28.35	137.975	0	0	0.000122256	-1.62395	19.2499	71.4538	30	40.6134	67.729	100000	100000	100003
28.4	137.975	0	0	0.000118554	-1.62395	19.2499	71.4538	30	40.6134	67.729	100000	100000	100003
28.45	137.975	0	0	0.000114964	-1.62395	19.2499	71.4538	30	40.6134	67.7291	100000	100000	100003
28.5	137.975	0	0	0.000111483	-1.62395	19.2499	71.4538	30	40.6134	67.7291	100000	100000	100003
28.55	137.975	0	0	0.000108107	-1.62395	19.2499	71.4538	30	40.6134	67.7291	100000	100000	100003
28.6	137.975	0	0	0.000104834	-1.62395	19.2499	71.4538	30	40.6134	67.7291	100000	100000	100003
28.65	137.975	0	0	0.000101659	-1.62395	19.2499	71.4538	30	40.6134	67.7291	100000	100000	100003
28.7	137.975	0	0	9.85809e-05	-1.62395	19.2499	71.4538	30	40.6134	67.7291	100000	100000	100003
28.75	137.975	0	0	9.55958e-05	-1.62395	19.2499	71.4538	30	40.6134	67.7291	100000	100000	100003
28.8	137.975	0	0	9.27011e-05	-1.62395	19.2499	71.4538	30	40.6134	67.7291	100000	100000	100003
28.85	137.975	0	0	8.9894e-05	-1.62395	19.2499	71.4538	30	40.6134	67.7291	100000	100000	100003
28.9	137.975	0	0	8.7172e-05	-1.62395	19.2499	71.4538	30	40.6134	67.7291	100000	100000	100003
28.95	137.975	0	0	8.45323e-05	-1.62395	19.2499	71.4538	30	40.6134	67.7291	100000	100000	100003
29	137.975	0	0	8.19726e-05	-1.62395	19.2499	71.4538	30	40.6134	67.7291	100000	100000	100003
29.05	137.975	0	0	7.94905e-05	-1.62395	19.2499	71.4538	30	40.6134	67.7291	100000	100000	100003
29.1	137.975	0	0	7.70834e-05	-1.62395	19.2499	71.4538	30	40.6134	67.7291	100000	100000	100003
29.15	137.975	0	0	7.47493e-05	-1.62395	19.2499	71.4538	30	40.6134	67.7291	100000	100000	100003
29.2	137.975	0	0	7.24858e-05	-1.62395	19.2499	71.4538	30	40.6134	67.7291	100000	100000	100003
29.25	137.975	0	0	7.02909e-05	-1.62395	19.2499	71.4538	30	40.6134	67.7291	100000	100000	100003
29.3	137.975	0	0	6.81625e-05	-1.62395	19.2499	71.4538	30	40.6134	67.7291	100000	100000	100003
29.35	137.975	0	0	6.60985e-05	-1.62395	19.2499	71.4538	30	40.6134	67.7291	100000	100000	100003
29.4	137.975	0	0	6.40969e-05	-1.62395	19.2499	71.4539	30	40.6134	67.7291	100000	100000	100003
29.45	137.975	0	0	6.2156e-05	-1.62395	19.2499	71.4539	30	40.6134	67.7291	100000	100000	100003
29.5	137.975	0	0	6.02739e-05	-1.62395	19.2499	71.4539	30	40.6134	67.7291	100000	100000	100003
29.55	137.975	0	0	5.84488e-05	-1.62395	19.2499	71.4539	30	40.6134	67.7291	100000	100000	100003
29.6	137.975	0	0	5.66789e-05	-1.62395	19.2499	71.4539	30	40.6134	67.7291	100000	100000	100003
29.65	137.975	0	0	5.49626e-05	-1.62395	19.2499	71.4539	30	40.6134	67.7291	100000	100000	100003
29.7	137.975	0	0	5.32983e-05	-1.62395	19.2499	71.4539	30	40.6134	67.7291	100000	100000	100003
29.75	137.975	0	0	5.16844e-05	-1.62395	19.2499	71.4539	30	40.6134	67.7291	100000	100000	100003
29.8	137.975	0	0	5.01194e-05	-1.62395	19.2499	71.4539	30	40.6134	67.7291	100000	100000	100003
29.85	137.975	0	0	4.86017e-05	-1.62395	19.2499	71.4539	30	40.6134	67.7291	100000	100000	100003
29.9	137.975	0	0	4.713e-05	-1.62395	19.2499	71.4539	30	40.6134	67.7291	100000	100000	100003
29.95	137.975	0	0	4.57029e-05	-1.62395	19.2499	71.4539	30	40.6134	67.7291	100000	100000	100003
30	137.975	0	0	4.4319e-05	-1.62395	19.2499	71.4539	30	40.6134	67.7291	100000	100000	100003
30.05	137.975	0	0	4.2977e-05	-1.62395	19.2499	71.4539	30	40.6134	67.7292	100000	100000	100003
30.1	137.975	0	0	4.16756e-05	-1.62395	19.2499	71.4539	30	40.6134	67.7292	100000	100000	100003
30.15	137.975	0	0	4.04136e-05	-1.62395	19.2499	71.4539	30	40.6134	67.7292	100000	100000	100003
30.2	137.975	0	0	3.91899e-05	-1.62395	19.2499	71.4539	30	40.6134	67.7292	100000	100000	100003
30.25	137.975	0	0	3.80032e-05	-1.62395	19.2499	71.4539	30	40.6134	67.7292	100000	100000	100003
30.3	137.975	0	0	3.68524e-05	-1.62395	19.2499	71.4539	30	40.6134	67.7292	100000	100000	100003
30.35	137.975	0	0	3.57365e-05	-1.62395	19.2499	71.4539	30	40.6134	67.7292	100000	100000	100003
30.4	137.975	0	0	3.46544e-05	-1.62395	19.2499	71.4539	30	40.6134	67.7292	100000	100000	100003
30.45	137.975	0	0	3.3605e-05	-1.62395	19.2499	71.4539	30	40.6134	67.7292	100000	100000	100003
30.5	137.975	0	0	3.25874e-05	-1.62395	19.2499	71.4539	30	40.6134	67.7292	100000	100000	100003
30.55	137.975	0	0	3.16006e-05	-1.62395	19.2499	71.4539	30	40.6134	67.7292	100000	100000	100003
30.6	137.975	0	0	3.06438e-05	-1.62395	19.2499	71.4539	30	40.6134	67.7292	100000	100000	100003
30.65	137.975	0	0	2.97158e-05	-1.62395	19.2499	71.4539	30	40.6134	67.7292	100000	100000	100003
30.7	137.975	0	0	2.8816e-05	-1.62395	19.2499	71.4539	30	40.6134	67.7292	100000	100000	100003
30.75	137.975	0	0	2.79435e-05	-1.62395	19.2499	71.4539	30	40.6134	67.7292	100000	100000	100003
30.8	137.975	0	0	2.70973e-05	-1.62395	19.2499	71.4539	30	40.6134	67.7292	100000	100000	100003
30.85	137.975	0	0	2.62768e-05	-1.62395	19.2499	71.4539	30	40.6134	67.7292	100000	100000	100003
30.9	137.975	0	0	2.54811e-05	-1.62395	19.2499	71.4539	30	40.6134	67.7292	100000	100000	100003
30.95	137.975	0	0	2.47095e-05	-1.62395	19.2499	71.4539	30	40.6134	67.7292	100000	100000	100003
31	137.975	0	0	2.39613e-05	-1.62395	19.2499	71.4539	30	40.6134	67.7292	100000	100000	100003
31.05	137.975	0	0	2.32357e-05	-1.62395	19.2499	71.4539	30	40.6134	67.7292	100000	100000	100003
31.1	137.975	0	0	2.25321e-05	-1.62395	19.2499	71.4539	30	40.6134	67.7292	100000	100000	100003
31.15	137.975	0	0	2.18498e-05	-1.62395	19.2499	71.4539	30	40.6134	67.7292	100000	100000	100003
31.2	137.975	0	0	2.11882e-05	-1.62395	19.2499	71.4539	30	40.6134	67.7292	100000	100000	100003
31.25	137.975	0	0	2.05466e-05	-1.62395	19.2499	71.4539	30	40.6134	67.7292	100000	100000	100003
31.3	137.975	0	0	1.99244e-05	-1.62395	19.2499	71.4539	30	40.6134	67.7292	100000	100000	100003
31.35	137.975	0	0	1.93211e-05	-1.62395	19.2499	71.4539	30	40.6134	67.7292	100000	100000	100003
31.4	137.975	0	0	1.87361e-05	-1.62395	19.2499	71.4539	30	40.6134	67.7292	100000	100000	100003
31.45	137.975	0	0	1.81687e-05	-1.62395	19.2499	71.4539	30	40.6134	67.7292	100000	100000	100003
31.5	137.975	0	0	1.76186e-05	-1.62395	19.2499	71.4539	30	40.6134	67.7292	100000	100000	100003
31.55	137.975	0	0	1.70851e-05	-1.62395	19.2499	71.4539	30	40.6134	67.7292	100000	100000	100003
31.6	137.975	0	0	1.65677e-05	-1.62395	19.2499	71.4539	30	40.6134	67.7292	100000	100000	100003
31.65	137.975	0	0	1.6066e-05	-1.62395	19.2499	71.4539	30	40.6134	67.7292	100000	100000	100003
31.7	137.975	0	0	1.55795e-05	-1.62395	19.2499	71.4539	30	40.6134	67.7292	100000	100000	100003
31.75	137.975	0	0	1.51078e-05	-1.62395	19.2499	71.4539	30	40.6134	67.7292	100000	100000	100003
31.8	137.975	0	0	1.46503e-05	-1.62395	19.2499	71.4539	30	40.6134	67.7292	100000	100000	100003
31.85	137.975	0	0	1.42067e-05	-1.62395	19.2499	71.4539	30	40.6134	67.7292	100000	100000	100003
31.9	137.975	0	0	1.37765e-05	-1.62395	19.2499	71.4539	30	40.6134	67.7292	100000	100000	100003
31.95	137.975	0	0	1.33593e-05	-1.62395	19.2499	71.4539	30	40.6134	67.7292	100000	100000	100003
32	137.975	0	0	1.29548e-05	-1.62395	19.2499	71.4539	30	40.6134	67.7292	100000	100000	100003
32.05	137.975	0	0	1.25625e-05	-1.62395	19.2499	71.4539	30	40.6134	67.7292	100000	100000	100003
32.1	137.975	0	0	1.21821e-05	-1.62395	19.2499	71.4539	30	40.6134	67.7292	100000	100000	100003
32.15	137.975	0	0	1.18132e-05	-1.62395	19.2499	71.4539	30	40.6134	67.7292	100000	100000	100003
32.2	137.975	0	0	1.14555e-05	-1.62395	19.2499	71.4539	30	40.6134	67.7292	100000	100000	100003
32.25	137.975	0	0	1.11086e-05	-1.62395	19.2499	71.4539	30	40.6134	67.7292	100000	100000	100003
32.3	137.975	0	0	1.07723e-05	-1.62395	19.2499	71.4539	30	40.6134	67.7292	100000	100000	100003
32.35	137.975	0	0	1.04461e-05	-1.62395	19.2499	71.4539	30	40.6134	67.7292	100000	100000	100003
32.4	137.975	0	0	1.01298e-05	-1.62395	19.2499	71.4539	30	40.6134	67.7292	100000	100000	100003
32.45	137.975	0	0	9.82302e-06	-1.62395	19.2499	71.4539	30	40.6134	67.7292	100000	100000	100003
32.5	137.975	0	0	9.52557e-06	-1.62395	19.2499	71.4539	30	40.6134	67.7292	100000	100000	100003
32.55	137.975	0	0	9.23712e-06	-1.62395	19.2499	71.4539	30	40.6134	67.7292	100000	100000	100003
32.6	137.975	0	0	8.95742e-06	-1.62395	19.2499	71.4539	30	40.6134	67.7292	100000	100000	100003
32.65	137.975	0	0	8.68618e-06	-1.62395	19.2499	71.4539	30	40.6134	67.7292	100000	100000	100003
32.7	137.975	0	0	8.42316e-06	-1.62395	19.2499	71.4539	30	40.6134	67.7292	100000	100000	100003
32.75	137.975	0	0	8.1681e-06	-1.62395	19.2499	71.4539	30	40.6134	67.7292	100000	100000	100003
32.8	137.975	0	0	7.92076e-06	-1.62395	19.2499	71.4539	30	40.6134	67.7292	100000	100000	100003
32.85	137.975	0	0	7.68092e-06	-1.62395	19.2499	71.4539	30	40.6134	67.7292	100000	100000	100003
32.9	137.975	0	0	7.44833e-06	-1.62395	19.2499	71.4539	30	40.6134	67.7292	100000	100000	100003
32.95	137.975	0	0	7.22279e-06	-1.62395	19.2499	71.4539	30	40.6134	67.7292	100000	100000	100003
33	137.975	0	0	7.00408e-06	-1.62395	19.2499	71.4539	30	40.6134	67.7292	100000	100000	100003
33.05	137.975	0	0	6.79199e-06	-1.62395	19.2499	71.4539	30	40.6134	67.7292	100000	100000	100003
33.1	137.975	0	0	6.58632e-06	-1.62395	19.2499	71.4539	30	40.6134	67.7292	100000	100000	100003
33.15	137.975	0	0	6.38689e-06	-1.62395	19.2499	71.4539	30	40.6134	67.7292	100000	100000	100003
33.2	137.975	0	0	6.19349e-06	-1.62395	19.2499	71.4539	30	40.6134	67.7292	100000	100000	100003
33.25	137.975	0	0	6.00594e-06	-1.62395	19.2499	71.4539	30	40.6134	67.7292	100000	100000	100003
33.3	137.975	0	0	5.82408e-06	-1.62395	19.2499	71.4539	30	40.6134	67.7292	100000	100000	100003
33.35	137.975	0	0	5.64772e-06	-1.62395	19.2499	71.4539	30	40.6134	67.7292	100000	100000	100003
33.4	137.975	0	0	5.4767e-06	-1.62395	19.2499	71.4539	30	40.6134	67.7292	100000	100000	100003
33.45	137.975	0	0	5.31086e-06	-1.62395	19.2499	71.4539	30	40.6134	67.7292	100000	100000	100003
33.5	137.975	0	0	5.15005e-06	-1.62395	19.2499	71.4539	30	40.6134	67.7292	100000	100000	100003
33.55	137.975	0	0	4.9941e-06	-1.62395	19.2499	71.4539	30	40.6134	67.7292	100000	100000	100003
33.6	137.975	0	0	4.84288e-06	-1.62395	19.2499	71.4539	30	40.6134	67.7292	100000	100000	100003
33.65	137.975	0	0	4.69623e-06	-1.62395	19.2499	71.4539	30	40.6134	67.7292	100000	100000	100003
33.7	137.975	0	0	4.55402e-06	-1.62395	19.2499	71.4539	30	40.6134	67.7292	100000	100000	100003
33.75	137.975	0	0	4.41612e-06	-1.62395	19.2499	71.4539	30	40.6134	67.7292	100000	100000	100003
33.8	137.975	0	0	4.2824e-06	-1.62395	19.2499	71.4539	30	40.6134	67.7292	100000	100000	100003
33.85	137.975	0	0	4.15273e-06	-1.62395	19.2499	71.4539	30	40.6134	67.7292	100000	100000	100003
33.9	137.975	0	0	4.02698e-06	-1.62395	19.2499	71.4539	30	40.6134	67.7292	100000	100000	100003
33.95	137.975	0	0	3.90504e-06	-1.62395	19.2499	71.4539	30	40.6134	67.7292	100000	100000	100003
34	137.975	0	0	3.78679e-06	-1.62395	19.2499	71.4539	30	40.6134	67.7292	100000	100000	100003
34.05	137.975	0	0	3.67212e-06	-1.62395	19.2499	71.4539	30	40.6134	67.7292	100000	100000	100003
34.1	137.975	0	0	3.56093e-06	-1.62395	19.2499	71.4539	30	40.6134	67.7292	100000	100000	100003
34.15	137.975	0	0	3.4531e-06	-1.62395	19.2499	71.4539	30	40.6134	67.7292	100000	100000	100003
34.2	137.975	0	0	3.34854e-06	-1.62395	19.2499	71.4539	30	40.6134	67.7292	100000	100000	100003
34.25	137.975	0	0	3.24714e-06	-1.62395	19.2499	71.4539	30	40.6134	67.7292	100000	100000	100003
34.3	137.975	0	0	3.14882e-06	-1.62395	19.2499	71.4539	30	40.6135	67.7292	100000	100000	100003
34.35	137.975	0	0	3.05347e-06	-1.62395	19.2499	71.4539	30	40.6135	67.7292	100000	100000	100003
34.4	137.975	0	0	2.96101e-06	-1.62395	19.2499	71.4539	30	40.6135	67.7292	100000	100000	100003
34.45	137.975	0	0	2.87135e-06	-1.62395	19.2499	71.4539	30	40.6135	67.7292	100000	100000	100003
34.5	137.975	0	0	2.7844e-06	-1.62395	19.2499	71.4539	30	40.6135	67.7292	100000	100000	100003
34.55	137.975	0	0	2.70009e-06	-1.62395	19.2499	71.4539	30	40.6135	67.7292	100000	100000	100003
34.6	137.975	0	0	2.61833e-06	-1.62395	19.2499	71.4539	30	40.6135	67.7292	100000	100000	100003
34.65	137.975	0	0	2.53904e-06	-1.62395	19.2499	71.4539	30	40.6135	67.7292	100000	100000	100003
34.7	137.975	0	0	2.46216e-06	-1.62395	19.2499	71.4539	30	40.6135	67.7292	100000	100000	100003
34.75	137.975	0	0	2.3876e-06	-1.62395	19.2499	71.4539	30	40.6135	67.7292	100000	100000	100003
34.8	137.975	0	0	2.3153e-06	-1.62395	19.2499	71.4539	30	40.6135	67.7292	100000	100000	100003
34.85	137.975	0	0	2.24519e-06	-1.62395	19.2499	71.4539	30	40.6135	67.7292	100000	100000	100003
34.9	137.975	0	0	2.17721e-06	-1.62395	19.2499	71.4539	30	40.6135	67.7292	100000	100000	100003
34.95	137.975	0	0	2.11128e-06	-1.62395	19.2499	71.4539	30	40.6135	67.7292	100000	100000	100003
35	137.975	0	0	2.04735e-06	-1.62395	19.2499	71.4539	30	40.6135	67.7292	100000	100000	100003
35.05	137.975	0	0	1.98535e-06	-1.62395	19.2499	71.4539	30	40.6135	67.7292	100000	100000	100003
35.1	137.975	0	0	1.92524e-06	-1.62395	19.2499	71.4539	30	40.6135	67.7292	100000	100000	100003
35.15	137.975	0	0	1.86694e-06	-1.62395	19.2499	71.4539	30	40.6135	67.7292	100000	100000	100003
35.2	137.975	0	0	1.81041e-06	-1.62395	19.2499	71.4539	30	40.6135	67.7292	100000	100000	100003
35.25	137.975	0	0	1.75558e-06	-1.62395	19.2499	71.4539	30	40.6135	67.7292	100000	100000	100003
35.3	137.975	0	0	1.70242e-06	-1.62395	19.2499	71.4539	30	40.6135	67.7292	100000	100000	100003
35.35	137.975	0	0	1.65087e-06	-1.62395	19.2499	71.4539	30	40.6135	67.7292	100000	100000	100003
35.4	137.975	0	0	1.60088e-06	-1.62395	19.2499	71.4539	30	40.6135	67.7292	100000	100000	100003
35.45	137.975	0	0	1.55241e-06	-1.62395	19.2499	71.4539	30	40.6135	67.7292	100000	100000	100003
35.5	137.975	0	0	1.5054e-06	-1.62395	19.2499	71.4539	30	40.6135	67.7292	100000	100000	100003
35.55	137.975	0	0	1.45982e-06	-1.62395	19.2499	71.4539	30	40.6135	67.7292	100000	100000	100003
35.6	137.975	0	0	1.41561e-06	-1.62395	19.2499	71.4539	30	40.6135	67.7292	100000	100000	100003
35.65	137.975	0	0	1.37275e-06	-1.62395	19.2499	71.4539	30	40.6135	67.7292	100000	100000	100003
35.7	137.975	0	0	1.33118e-06	-1.62395	19.2499	71.4539	30	40.6135	67.7292	100000	100000	100003
35.75	137.975	0	0	1.29087e-06	-1.62395	19.2499	71.4539	30	40.6135	67.7292	100000	100000	100003
35.8	137.975	0	0	1.25178e-06	-1.62395	19.2499	71.4539	30	40.6135	67.7292	100000	100000	100003
35.85	137.975	0	0	1.21388e-06	-1.62395	19.2499	71.4539	30	40.6135	67.7292	100000	100000	100003
35.9	137.975	0	0	1.17712e-06	-1.62395	19.2499	71.4539	30	40.6135	67.7292	100000	100000	100003
35.95	137.975	0	0	1.14147e-06	-1.62395	19.2499	71.4539	30	40.6135	67.7292	100000	100000	100003
36	137.975	0	0	1.10691e-06	-1.62395	19.2499	71.4539	30	40.6135	67.7292	100000	100000	100003
36.05	137.975	0	0	1.07339e-06	-1.62395	19.2499	71.4539	30	40.6135	67.7292	100000	100000	100003
36.1	137.975	0	0	1.04089e-06	-1.62395	19.2499	71.4539	30	40.6135	67.7292	100000	100000	100003
36.15	137.975	0	0	1.00937e-06	-1.62395	19.2499	71.4539	30	40.6135	67.7292	100000	100000	100003
36.2	137.975	0	0	9.78805e-07	-1.62395	19.2499	71.4539	30	40.6135	67.7292	100000	100000	100003
36.25	137.975	0	0	9.49166e-07	-1.62395	19.2499	71.4539	30	40.6135	67.7292	100000	100000	100003
36.3	137.975	0	0	9.20425e-07	-1.62395	19.2499	71.4539	30	40.6135	67.7292	100000	100000	100003
36.35	137.975	0	0	8.92553e-07	-1.62395	19.2499	71.4539	30	40.6135	67.7292	100000	100000	100003
36.4	137.975	0	0	8.65526e-07	-1.62395	19.2499	71.4539	30	40.6135	67.7292	100000	100000	100003
36.45	137.975	0	0	8.39317e-07	-1.62395	19.2499	71.4539	30	40.6135	67.7292	100000	100000	100003
36.5	137.975	0	0	8.13902e-07	-1.62395	19.2499	71.4539	30	40.6135	67.7292	100000	100000	100003
36.55	137.975	0	0	7.89257e-07	-1.62395	19.2499	71.4539	30	40.6135	67.7292	100000	100000	100003
36.6	137.975	0	0	7.65357e-07	-1.62395	19.2499	71.4539	30	40.6135	67.7292	100000	100000	100003
36.65	137.975	0	0	7.42182e-07	-1.62395	19.2499	71.4539	30	40.6135	67.7292	100000	100000	100003
36.7	137.975	0	0	7.19708e-07	-1.62395	19.2499	71.4539	30	40.6135	67.7292	100000	100000	100003
36.75	137.975	0	0	6.97915e-07	-1.62395	19.2499	71.4539	30	40.6135	67.7292	100000	100000	100003
36.8	137.975	0	0	6.76781e-07	-1.62395	19.2499	71.4539	30	40.6135	67.7292	100000	100000	100003
36.85	137.975	0	0	6.56288e-07	-1.62395	19.2499	71.4539	30	40.6135	67.7292	100000	100000	100003
36.9	137.975	0	0	6.36415e-07	-1.62395	19.2499	71.4539	30	40.6135	67.7292	100000	100000	100003
36.95	137.975	0	0	6.17144e-07	-1.62395	19.2499	71.4539	30	40.6135	67.7292	100000	100000	100003
37	137.975	0	0	5.98456e-07	-1.62395	19.2499	71.4539	30	40.6135	67.7292	100000	100000	100003
37.05	137.975	0	0	5.80335e-07	-1.62395	19.2499	71.4539	30	40.6135	67.7292	100000	100000	100003
37.1	137.975	0	0	5.62761e-07	-1.62395	19.2499	71.4539	30	40.6135	67.7292	100000	100000	100003
37.15	137.975	0	0	5.45721e-07	-1.62395	19.2499	71.4539	30	40.6135	67.7292	100000	100000	100003
37.2	137.975	0	0	5.29196e-07	-1.62395	19.2499	71.4539	30	40.6135	67.7292	100000	100000	100003
37.25	137.975	0	0	5.13172e-07	-1.62395	19.2499	71.4539	30	40.6135	67.7292	100000	100000	100003
37.3	137.975	0	0	4.97632e-07	-1.62395	19.2499	71.4539	30	40.6135	67.7292	100000	100000	100003
37.35	137.975	0	0	4.82564e-07	-1.62395	19.2499	71.4539	30	40.6135	67.7292	100000	100000	100003
37.4	137.975	0	0	4.67951e-07	-1.62395	19.2499	71.4539	30	40.6135	67.7292	100000	100000	100003
37.45	137.975	0	0	4.53781e-07	-1.62395	19.2499	71.4539	30	40.6135	67.7292	100000	100000	100003
37.5	137.975	0	0	4.40041e-07	-1.62395	19.2499	71.4539	30	40.6135	67.7292	100000	100000	100003
37.55	137.975	0	0	4.26716e-07	-1.62395	19.2499	71.4539	30	40.6135	67.7292	100000	100000	100003
37.6	137.975	0	0	4.13795e-07	-1.62395	19.2499	71.4539	30	40.6135	67.7292	100000	100000	100003
37.65	137.975	0	0	4.01265e-07	-1.62395	19.2499	71.4539	30	40.6135	67.7292	100000	100000	100003
37.7	137.975	0	0	3.89115e-07	-1.62395	19.2499	71.4539	30	40.6135	67.7292	100000	100000	100003
37.75	137.975	0	0	3.77332e-07	-1.62395	19.2499	71.4539	30	40.6135	67.7292	100000	100000	100003
37.8	137.975	0	0	3.65906e-07	-1.62395	19.2499	71.4539	30	40.6135	67.7292	100000	100000	100003
37.85	137.975	0	0	3.54827e-07	-1.62395	19.2499	71.4539	30	40.6135	67.7292	100000	100000	100003
37.9	137.975	0	0	3.44083e-07	-1.62395	19.2499	71.4539	30	40.6135	67.7292	100000	100000	100003
37.95	137.975	0	0	3.33664e-07	-1.62395	19.2499	71.4539	30	40.6135	67.7292	100000	100000	100003
38	137.975	0	0	3.2356e-07	-1.62395	19.2499	71.4539	30	40.6135	67.7292	100000	100000	100003
38.05	137.975	0	0	3.13763e-07	-1.62395	19.2499	71.4539	30	40.6135	67.7292	100000	100000	100003
38.1	137.975	0	0	3.04262e-07	-1.62395	19.2499	71.4539	30	40.6135	67.7292	100000	100000	100003
38.15	137.975	0	0	2.95049e-07	-1.62395	19.2499	71.4539	30	40.6135	67.7292	100000	100000	100003
38.2	137.975	0	0	2.86115e-07	-1.62395	19.2499	71.4539	30	40.6135	67.7292	100000	100000	100003
38.25	137.975	0	0	2.77451e-07	-1.62395	19.2499	71.4539	30	40.6135	67.7292	100000	100000	100003
38.3	137.975	0	0	2.6905e-07	-1.62395	19.2499	71.4539	30	40.6135	67.7292	100000	100000	100003
38.35	137.975	0	0	2.60903e-07	-1.62395	19.2499	71.4539	30	40.6135	67.7292	100000	100000	100003
38.4	137.975	0	0	2.53003e-07	-1.62395	19.2499	71.4539	30	40.6135	67.7292	100000	100000	100003
38.45	137.975	0	0	2.45342e-07	-1.62395	19.2499	71.4539	30	40.6135	67.7292	100000	100000	100003
38.5	137.975	0	0	2.37913e-07	-1.62395	19.2499	71.4539	30	40.6135	67.7292	100000	100000	100003
38.55	137.975	0	0	2.30709e-07	-1.62395	19.2499	71.4539	30	40.6135	67.7292	100000	100000	100003
38.6	137.975	0	0	2.23723e-07	-1.62395	19.2499	71.4539	30	40.6135	67.7292	100000	100000	100003
38.65	137.975	0	0	2.16948e-07	-1.62395	19.2499	71.4539	30	40.6135	67.7292	100000	100000	100003
38.7	137.975	0	0	2.10379e-07	-1.62395	19.2499	71.4539	30	40.6135	67.7292	100000	100000	100003
38.75	137.975	0	0	2.04009e-07	-1.62395	19.2499	71.4539	30	40.6135	67.7292	100000	100000	100003
38.8	137.975	0	0	1.97831e-07	-1.62395	19.2499	71.4539	30	40.6135	67.7292	100000	100000	100003
38.85	137.975	0	0	1.91841e-07	-1.62395	19.2499	71.4539	30	40.6135	67.7292	100000	100000	100003
38.9	137.975	0	0	1.86032e-07	-1.62395	19.2499	71.4539	30	40.6135	67.7292	100000	100000	100003
38.95	137.975	0	0	1.80399e-07	-1.62395	19.2499	71.4539	30	40.6135	67.7292	100000	100000	100003
39	137.975	0	0	1.74936e-07	-1.62395	19.2499	71.4539	30	40.6135	67.7292	100000	100000	100003
39.05	137.975	0	0	1.69639e-07	-1.62395	19.2499	71.4539	30	40.6135	67.7292	100000	100000	100003
39.1	137.975	0	0	1.64503e-07	-1.62395	19.2499	71.4539	30	40.6135	67.7292	100000	100000	100003
39.15	137.975	0	0	1.59521e-07	-1.62395	19.2499	71.4539	30	40.6135	67.7292	100000	100000	100003
39.2	137.975	0	0	1.54691e-07	-1.62395	19.2499	71.4539	30	40.6135	67.7292	100000	100000	100003
39.25	137.975	0	0	1.50007e-07	-1.62395	19.2499	71.4539	30	40.6135	67.7292	100000	100000	100003
39.3	137.975	0	0	1.45465e-07	-1.62395	19.2499	71.4539	30	40.6135	67.7292	100000	100000	100003
39.35	137.975	0	0	1.4106e-07	-1.62395	19.2499	71.4539	30	40.6135	67.7292	100000	100000	100003
39.4	137.975	0	0	1.36789e-07	-1.62395	19.2499	71.4539	30	40.6135	67.7292	100000	100000	100003
39.45	137.975	0	0	1.32647e-07	-1.62395	19.2499	71.4539	30	40.6135	67.7292	100000	100000	100003
39.5	137.975	0	0	1.2863e-07	-1.62395	19.2499	71.4539	30	40.6135	67.7292	100000	100000	100003
39.55	137.975	0	0	1.24735e-07	-1.62395	19.2499	71.4539	30	40.6135	67.7292	100000	100000	100003
39.6	137.975	0	0	1.20958e-07	-1.62395	19.2499	71.4539	30	40.6135	67.7292	100000	100000	100003
39.65	137.975	0	0	1.17296e-07	-1.62395	19.2499	71.4539	30	40.6135	67.7292	100000	100000	100003
39.7	137.975	0	0	1.13744e-07	-1.62395	19.2499	71.4539	30	40.6135	67.7292	100000	100000	100003
39.75	137.975	0	0	1.103e-07	-1.62395	19.2499	71.4539	30	40.6135	67.7292	100000	100000	100003
39.8	137.975	0	0	1.0696e-07	-1.62395	19.2499	71.4539	30	40.6135	67.7292	100000	100000	100003
39.85	137.975	0	0	1.03721e-07	-1.62395	19.2499	71.4539	30	40.6135	67.7292	100000	100000	100003
39.9	137.975	0	0	1.0058e-07	-1.62395	19.2499	71.4539	30	40.6135	67.7292	100000	100000	100003
39.95	137.975	0	0	9.75346e-08	-1.62395	19.2499	71.4539	30	40.6135	67.7292	100000	100000	100003
40	137.975	0	0	9.45813e-08	-1.62395	19.2499	71.4539	30	40.6135	67.7292	100000	100000	100003
40.05	137.975	0	0	9.17173e-08	-1.62395	19.2499	71.4539	30	40.6135	67.7292	100000	100000	100003
40.1	137.975	0	0	8.89401e-08	-1.62395	19.2499	71.4539	30	40.6135	67.7292	100000	100000	100003
40.15	137.975	0	0	8.6247e-08	-1.62395	19.2499	71.4539	30	40.6135	67.7292	100000	100000	100003
40.2	137.975	0	0	8.36354e-08	-1.62395	19.2499	71.4539	30	40.6135	67.7292	100000	100000	100003
40.25	137.975	0	0	8.11029e-08	-1.62395	19.2499	71.4539	30	40.6135	67.7292	100000	100000	100003
40.3	137.975	0	0	7.86471e-08	-1.62395	19.2499	71.4539	30	40.6135	67.7292	100000	100000	100003
40.35	137.975	0	0	7.62656e-08	-1.62395	19.2499	71.4539	30	40.6135	67.7292	100000	100000	100003
40.4	137.975	0	0	7.39563e-08	-1.62395	19.2499	71.4539	30	40.6135	67.7292	100000	100000	100003
40.45	137.975	0	0	7.17169e-08	-1.62395	19.2499	71.4539	30	40.6135	67.7292	100000	100000	100003
40.5	137.975	0	0	6.95453e-08	-1.62395	19.2499	71.4539	30	40.6135	67.7292	100000	100000	100003
40.55	137.975	0	0	6.74394e-08	-1.62395	19.2499	71.4539	30	40.6135	67.7292	100000	100000	100003
40.6	137.975	0	0	6.53974e-08	-1.62395	19.2499	71.4539	30	40.6135	67.7292	100000	100000	100003
40.65	137.975	0	0	6.34171e-08	-1.62395	19.2499	71.4539	30	40.6135	67.7292	100000	100000	100003
40.7	137.975	0	0	6.14968e-08	-1.62395	19.2499	71.4539	30	40.6135	67.7292	100000	100000	100003
40.75	137.975	0	0	5.96347e-08	-1.62395	19.2499	71.4539	30	40.6135	67.7292	100000	100000	100003
40.8	137.975	0	0	5.78289e-08	-1.62395	19.2499	71.4539	30	40.6135	67.7292	100000	100000	100003
40.85	137.975	0	0	5.60779e-08	-1.62395	19.2499	71.4539	30	40.6135	67.7292	100000	100000	100003
40.9	137.975	0	0	5.43798e-08	-1.62395	19.2499	71.4539	30	40.6135	67.7292	100000	100000	100003
40.95	137.975	0	0	5.27332e-08	-1.62395	19.2499	71.4539	30	40.6135	67.7292	100000	100000	100003
41	137.975	0	0	5.11364e-08	-1.62395	19.2499	71.4539	30	40.6135	67.7292	100000	100000	100003
41.05	137.975	0	0	4.9588e-08	-1.62395	19.2499	71.4539	30	40.6135	67.7292	100000	100000	100003
41.1	137.975	0	0	4.80865e-08	-1.62395	19.2499	71.4539	30	40.6135	67.7292	100000	100000	100003
41.15	137.975	0	0	4.66304e-08	-1.62395	19.2499	71.4539	30	40.6135	67.7292	100000	100000	100003
41.2	137.975	0	0	4.52184e-08	-1.62395	19.2499	71.4539	30	40.6135	67.7292	100000	100000	100003
41.25	137.975	0	0	4.38493e-08	-1.62395	19.2499	71.4539	30	40.6135	67.7292	100000	100000	100003
41.3	137.975	0	0	4.25216e-08	-1.62395	19.2499	71.4539	30	40.6135	67.7292	100000	100000	100003
41.35	137.975	0	0	4.12341e-08	-1.62395	19.2499	71.4539	30	40.6135	67.7292	100000	100000	100003
41.4	137.975	0	0	3.99856e-08	-1.62395	19.2499	71.4539	30	40.6135	67.7292	100000	100000	100003
41.45	137.975	0	0	3.8775e-08	-1.62395	19.2499	71.4539	30	40.6135	67.7292	100000	100000	100003
41.5	137.975	0	0	3.76009e-08	-1.62395	19.2499	71.4539	30	40.6135	67.7292	100000	100000	100003
41.55	137.975	0	0	3.64625e-08	-1.62395	19.2499	71.4539	30	40.6135	67.7292	100000	100000	100003
41.6	137.975	0	0	3.53586e-08	-1.62395	19.2499	71.4539	30	40.6135	67.7292	100000	100000	100003
41.65	137.975	0	0	3.42882e-08	-1.62395	19.2499	71.4539	30	40.6135	67.7292	100000	100000	100003
41.7	137.975	0	0	3.32502e-08	-1.62395	19.2499	71.4539	30	40.6135	67.7292	100000	100000	100003
41.75	137.975	0	0	3.22436e-08	-1.62395	19.2499	71.4539	30	40.6135	67.7292	100000	100000	100003
41.8	137.975	0	0	3.12674e-08	-1.62395	19.2499	71.4539	30	40.6135	67.7292	100000	100000	100003
41.85	137.975	0	0	3.03207e-08	-1.62395	19.2499	71.4539	30	40.6135	67.7292	100000	100000	100003
41.9	137.975	0	0	2.94027e-08	-1.62395	19.2499	71.4539	30	40.6135	67.7292	100000	100000	100003
41.95	137.975	0	0	2.85126e-08	-1.62395	19.2499	71.4539	30	40.6135	67.7292	100000	100000	100003
42	137.975	0	0	2.76495e-08	-1.62395	19.2499	71.4539	30	40.6135	67.7292	100000	100000	100003
42.05	137.975	0	0	2.68125e-08	-1.62395	19.2499	71.4539	30	40.6135	67.7292	100000	100000	100003
42.1	137.975	0	0	2.60008e-08	-1.62395	19.2499	71.4539	30	40.6135	67.7292	100000	100000	100003
42.15	137.975	0	0	2.52136e-08	-1.62395	19.2499	71.4539	30	40.6135	67.7292	100000	100000	100003
42.2	137.975	0	0	2.44502e-08	-1.62395	19.2499	71.4539	30	40.6135	67.7292	100000	100000	100003
42.25	137.975	0	0	2.37099e-08	-1.62395	19.2499	71.4539	30	40.6135	67.7292	100000	100000	100003
42.3	137.975	0	0	2.29921e-08	-1.62395	19.2499	71.4539	30	40.6135	67.7292	100000	100000	100003
42.35	137.975	0	0	2.2296e-08	-1.62395	19.2499	71.4539	30	40.6135	67.7292	100000	100000	100003
42.4	137.975	0	0	2.1621e-08	-1.62395	19.2499	71.4539	30	40.6135	67.7292	100000	100000	100003
42.45	137.975	0	0	2.09664e-08	-1.62395	19.2499	71.4539	30	40.6135	67.7292	100000	100000	100003
42.5	137.975	0	0	2.03316e-08	-1.62395	19.2499	71.4539	30	40.6135	67.7292	100000	100000	100003
42.55	137.975	0	0	1.9716e-08	-1.62395	19.2499	71.4539	30	40.6135	67.7292	100000	100000	100003
42.6	137.975	0	0	1.91189e-08	-1.62395	19.2499	71.4539	30	40.6135	67.7292	100000	100000	100003
42.65	137.975	0	0	1.85401e-08	-1.62395	19.2499	71.4539	30	40.6135	67.7292	100000	100000	100003
42.7	137.975	0	0	1.79787e-08	-1.62395	19.2499	71.4539	30	40.6135	67.7292	100000	100000	100003
42.75	137.975	0	0	1.74344e-08	-1.62395	19.2499	71.4539	30	40.6135	67.7292	100000	100000	100003
42.8	137.975	0	0	1.69065e-08	-1.62395	19.2499	71.4539	30	40.6135	67.7292	100000	100000	100003
42.85	137.975	0	0	1.63947e-08	-1.62395	19.2499	71.4539	30	40.6135	67.7292	100000	100000	100003
42.9	137.975	0	0	1.58983e-08	-1.62395	19.2499	71.4539	30	40.6135	67.7292	100000	100000	100003
42.95	137.975	0	0	1.5417e-08	-1.62395	19.2499	71.4539	30	40.6135	67.7292	100000	100000	100003
43	137.975	0	0	1.49503e-08	-1.62395	19.2499	71.4539	30	40.6135	67.7292	100000	100000	100003
43.05	137.975	0	0	1.44977e-08	-1.62395	19.2499	71.4539	30	40.6135	67.7292	100000	100000	100003
43.1	137.975	0	0	1.40588e-08	-1.62395	19.2499	71.4539	30	40.6135	67.7292	100000	100000	100003
43.15	137.975	0	0	1.36332e-08	-1.62395	19.2499	71.4539	30	40.6135	67.7292	100000	100000	100003
43.2	137.975	0	0	1.32205e-08	-1.62395	19.2499	71.4539	30	40.6135	67.7292	100000	100000	100003
43.25	137.975	0	0	1.28203e-08	-1.62395	19.2499	71.4539	30	40.6135	67.7292	100000	100000	100003
43.3	137.975	0	0	1.24321e-08	-1.62395	19.2499	71.4539	30	40.6135	67.7292	100000	100000	100003
43.35	137.975	0	0	1.20558e-08	-1.62395	19.2499	71.4539	30	40.6135	67.7292	100000	100000	100003
43.4	137.975	0	0	1.1691e-08	-1.62395	19.2499	71.4539	30	40.6135	67.7292	100000	100000	100003
43.45	137.975	0	0	1.13373e-08	-1.62395	19.2499	71.4539	30	40.6135	67.7292	100000	100000	100003
43.5	137.975	0	0	1.09944e-08	-1.62395	19.2499	71.4539	30	40.6135	67.7292	100000	100000	100003
43.55	137.975	0	0	1.06619e-08	-1.62395	19.2499	71.4539	30	40.6135	67.7292	100000	100000	100003
43.6	137.975	0	0	1.03395e-08	-1.62395	19.2499	71.4539	30	40.6135	67.7292	100000	100000	100003
43.65	137.975	0	0	1.00268e-08	-1.62395	19.2499	71.4539	30	40.6135	67.7292	100000	100000	100003
43.7	137.975	0	0	9.7236e-09	-1.62395	19.2499	71.4539	30	40.6135	67.7292	100000	100000	100003
43.75	137.975	0	0	9.42953e-09	-1.62395	19.2499	71.4539	30	40.6135	67.7292	100000	100000	100003
43.8	137.975	0	0	9.14429e-09	-1.62395	19.2499	71.4539	30	40.6135	67.7292	100000	100000	100003
43.85	137.975	0	0	8.86757e-09	-1.62395	19.2499	71.4539	30	40.6135	67.7292	100000	100000	100003
43.9	137.975	0	0	8.5991e-09	-1.62395	19.2499	71.4539	30	40.6135	67.7292	100000	100000	100003
43.95	137.975	0	0	8.33939e-09	-1.62395	19.2499	71.4539	30	40.6135	67.7292	100000	100000	100003
44	137.975	0	0	8.0876e-09	-1.62395	19.2499	71.4539	30	40.6135	67.7292	100000	100000	100003
44.05	137.975	0	0	7.84349e-09	-1.62395	19.2499	71.4539	30	40.6135	67.7292	100000	100000	100003
44.1	137.975	0	0	7.6068e-09	-1.62395	19.2499	71.4539	30	40.6135	67.7292	100000	100000	100003
44.15	137.975	0	0	7.37728e-09	-1.62395	19.2499	71.4539	30	40.6135	67.7292	100000	100000	100003
44.2	137.975	0	0	7.1547e-09	-1.62395	19.2499	71.4539	30	40.6135	67.7292	100000	100000	100003
44.25	137.975	0	0	6.93882e-09	-1.62395	19.2499	71.4539	30	40.6135	67.7292	100000	100000	100003
44.3	137.975	0	0	6.72937e-09	-1.62395	19.2499	71.4539	30	40.6135	67.7292	100000	100000	100003
44.35	137.975	0	0	6.52613e-09	-1.62395	19.2499	71.4539	30	40.6135	67.7292	100000	100000	100003
44.4	137.975	0	0	6.32885e-09	-1.62395	19.2499	71.4539	30	40.6135	67.7292	100000	100000	100003
44.45	137.975	0	0	6.13728e-09	-1.62395	19.2499	71.4539	30	40.6135	67.7292	100000	100000	100003
44.5	137.975	0	0	5.95154e-09	-1.62395	19.2499	71.4539	30	40.6135	67.7292	100000	100000	100003
44.55	137.975	0	0	5.7716e-09	-1.62395	19.2499	71.4539	30	40.6135	67.7292	100000	100000	100003
44.6	137.975	0	0	5.59704e-09	-1.62395	19.2499	71.4539	30	40.6135	67.7292	100000	100000	100003
44.65	137.975	0	0	5.42769e-09	-1.62395	19.2499	71.4539	30	40.6135	67.7292	100000	100000	100003
44.7	137.975	0	0	5.26341e-09	-1.62395	19.2499	71.4539	30	40.6135	67.7292	100000	100000	100003
44.75	137.975	0	0	5.10403e-09	-1.62395	19.2499	71.4539	30	40.6135	67.7292	100000	100000	100003
44.8	137.975	0	0	4.94944e-09	-1.62395	19.2499	71.4539	30	40.6135	67.7292	100000	100000	100003
44.85	137.975	0	0	4.79949e-09	-1.62395	19.2499	71.4539	30	40.6135	67.7292	100000	100000	100003
44.9	137.975	0	0	4.65405e-09	-1.62395	19.2499	71.4539	30	40.6135	67.7292	100000	100000	100003
44.95	137.975	0	0	4.51289e-09	-1.62395	19.2499	71.4539	30	40.6135	67.7292	100000	100000	100003
45	137.975	0	0	4.37596e-09	-1.62395	19.2499	71.4539	30	40.6135	67.7292	100000	100000	100003
45.05	137.975	0	0	4.24315e-09	-1.62395	19.2499	71.4539	30	40.6135	67.7292	100000	100000	100003
45.1	137.975	0	0	4.11434e-09	-1.62395	19.2499	71.4539	30	40.6135	67.7292	100000	100000	100003
45.15	137.975	0	0	3.98944e-09	-1.62395	19.2499	71.4539	30	40.6135	67.7292	100000	100000	100003
45.2	137.975	0	0	3.86834e-09	-1.62395	19.2499	71.4539	30	40.6135	67.7292	100000	100000	100003
45.25	137.975	0	0	3.75095e-09	-1.62395	19.2499	71.4539	30	40.6135	67.7292	100000	100000	100003
45.3	137.975	0	0	3.63718e-09	-1.62395	19.2499	71.4539	30	40.6135	67.7292	100000	100000	100003
45.35	137.975	0	0	3.52678e-09	-1.62395	19.2499	71.4539	30	40.6135	67.7292	100000	100000	100003
45.4	137.975	0	0	3.41973e-09	-1.62395	19.2499	71.4539	30	40.6135	67.7292	100000	100000	100003
45.45	137.975	0	0	3.31595e-09	-1.62395	19.2499	71.4539	30	40.6135	67.7292	100000	100000	100003
45.5	137.975	0	0	3.21535e-09	-1.62395	19.2499	71.4539	30	40.6135	67.7292	100000	100000	100003
45.55	137.975	0	0	3.11783e-09	-1.62395	19.2499	71.4539	30	40.6135	67.7292	100000	100000	100003
45.6	137.975	0	0	3.02331e-09	-1.62395	19.2499	71.4539	30	40.6135	67.7292	100000	100000	100003
45.65	137.975	0	0	2.93169e-09	-1.62395	19.2499	71.4539	30	40.6135	67.7292	100000	100000	100003
45.7	137.975	0	0	2.8429e-09	-1.62395	19.2499	71.4539	30	40.6135	67.7292	100000	100000	100003
45.75	137.975	0	0	2.75684e-09	-1.62395	19.2499	71.4539	30	40.6135	67.7292	100000	100000	100003
45.8	137.975	0	0	2.67342e-09	-1.62395	19.2499	71.4539	30	40.6135	67.7292	100000	100000	100003
45.85	137.975	0	0	2.59256e-09	-1.62395	19.2499	71.4539	30	40.6135	67.7292	100000	100000	100003
45.9	137.975	0	0	2.51417e-09	-1.62395	19.2499	71.4539	30	40.6135	67.7292	100000	100000	100003
45.95	137.975	0	0	2.43817e-09	-1.62395	19.2499	71.4539	30	40.6135	67.7292	100000	100000	100003
46	137.975	0	0	2.36447e-09	-1.62395	19.2499	71.4539	30	40.6135	67.7292	100000	100000	100003
46.05	137.975	0	0	2.29299e-09	-1.62395	19.2499	71.4539	30	40.6135	67.7292	100000	100000	100003
46.1	137.975	0	0	2.22363e-09	-1.62395	19.2499	71.4539	30	40.6135	67.7292	100000	100000	100003
46.15	137.975	0	0	2.1564e-09	-1.62395	19.2499	71.4539	30	40.6135	67.7292	100000	100000	100003
46.2	137.975	0	0	2.09154e-09	-1.62395	19.2499	71.4539	30	40.6135	67.7292	100000	100000	100003
46.25	137.975	0	0	2.02873e-09	-1.62395	19.2499	71.4539	30	40.6135	67.7292	100000	100000	100003
46.3	137.975	0	0	1.9679e-09	-1.62395	19.2499	71.4539	30	40.6135	67.7292	100000	100000	100003
46.35	137.975	0	0	1.909e-09	-1.62395	19.2499	71.4539	30	40.6135	67.7292	100000	100000	100003
46.4	137.975	0	0	1.85194e-09	-1.62395	19.2499	71.4539	30	40.6135	67.7292	100000	100000	100003
46.45	137.975	0	0	1.79667e-09	-1.62395	19.2499	71.4539	30	40.6135	67.7292	100000	100000	100003
46.5	137.975	0	0	1.7431e-09	-1.62395	19.2499	71.4539	30	40.6135	67.7292	100000	100000	100003
46.55	137.975	0	0	1.69117e-09	-1.62395	19.2499	71.4539	30	40.6135	67.7292	100000	100000	100003
46.6	137.975	0	0	1.64079e-09	-1.62395	19.2499	71.4539	30	40.6135	67.7292	100000	100000	100003
46.65	137.975	0	0	1.59189e-09	-1.62395	19.2499	71.4539	30	40.6135	67.7292	100000	100000	100003
46.7	137.975	0	0	1.54437e-09	-1.62395	19.2499	71.4539	30	40.6135	67.7292	100000	100000	100003
46.75	137.975	0	0	1.49814e-09	-1.62395	19.2499	71.4539	30	40.6135	67.7292	100000	100000	100003
46.8	137.975	0	0	1.45312e-09	-1.62395	19.2499	71.4539	30	40.6135	67.7292	100000	100000	100003
46.85	137.975	0	0	1.40918e-09	-1.62395	19.2499	71.4539	30	40.6135	67.7292	100000	100000	100003
46.9	137.975	0	0	1.36657e-09	-1.62395	19.2499	71.4539	30	40.6135	67.7292	100000	100000	100003
46.95	137.975	0	0	1.32557e-09	-1.62395	19.2499	71.4539	30	40.6135	67.7292	100000	100000	100003
47	137.975	0	0	1.28575e-09	-1.62395	19.2499	71.4539	30	40.6135	67.7292	100000	100000	100003
47.05	137.975	0	0	1.24706e-09	-1.62395	19.2499	71.4539	30	40.6135	67.7292	100000	100000	100003
47.1	137.975	0	0	1.20947e-09	-1.62395	19.2499	71.4539	30	40.6135	67.7292	100000	100000	100003
47.15	137.975	0	0	1.17294e-09	-1.62395	19.2499	71.4539	30	40.6135	67.7292	100000	100000	100003
47.2	137.975	0	0	1.13746e-09	-1.62395	19.2499	71.4539	30	40.6135	67.7292	100000	100000	100003
47.25	137.975	0	0	1.10298e-09	-1.62395	19.2499	71.4539	30	40.6135	67.7292	100000	100000	100003
47.3	137.975	0	0	1.06949e-09	-1.62395	19.2499	71.4539	30	40.6135	67.7292	100000	100000	100003
47.35	137.975	0	0	1.03698e-09	-1.62395	19.2499	71.4539	30	40.6135	67.7292	100000	100000	100003
47.4	137.975	0	0	1.00532e-09	-1.62395	19.2499	71.4539	30	40.6135	67.7292	100000	100000	100003
47.45	137.975	0	0	9.74572e-10	-1.62395	19.2499	71.4539	30	40.6135	67.7292	100000	100000	100003
47.5	137.975	0	0	9.44707e-10	-1.62395	19.2499	71.4539	30	40.6135	67.7292	100000	100000	100003
47.55	137.975	0	0	9.15716e-10	-1.62395	19.2499	71.4539	30	40.6135	67.7292	100000	100000	100003
47.6	137.975	0	0	8.8759e-10	-1.62395	19.2499	71.4539	30	40.6135	67.7292	100000	100000	100003
47.65	137.975	0	0	8.60323e-10	-1.62395	19.2499	71.4539	30	40.6135	67.7292	100000	100000	100003
47.7	137.975	0	0	8.33911e-10	-1.62395	19.2499	71.4539	30	40.6135	67.7292	100000	100000	100003
47.75	137.975	0	0	8.08355e-10	-1.62395	19.2499	71.4539	30	40.6135	67.7292	100000	100000	100003
47.8	137.975	0	0	7.83659e-10	-1.62395	19.2499	71.4539	30	40.6135	67.7292	100000	100000	100003
47.85	137.975	0	0	7.59663e-10	-1.62395	19.2499	71.4539	30	40.6135	67.7292	100000	100000	100003
47.9	137.975	0	0	7.36302e-10	-1.62395	19.2499	71.4539	30	40.6135	67.7292	100000	100000	100003
47.95	137.975	0	0	7.13672e-10	-1.62395	19.2499	71.4539	30	40.6135	67.7292	100000	100000	100003
48	137.975	0	0	6.91757e-10	-1.62395	19.2499	71.4539	30	40.6135	67.7292	100000	100000	100003
48.05	137.975	0	0	6.70545e-10	-1.62395	19.2499	71.4539	30	40.6135	67.7292	100000	100000	100003

## Sheet: FP4
Time	RI	FP	BH	fructose	formate	acetate	butyrate	unknown compound	H20	CO2	lag_RI	lag_FP	lag_BH
0.05	0	0.00606716	0	49.4634	0.535882	47.5937	0.105928	30	0	3.54245e-09	0.11121	1.12733e-05	0.109544
0.1	0	0.00606716	0	49.4634	0.535882	47.5937	0.105928	30	0	7.53587e-09	0.123677	1.27088e-05	0.119998
0.15	0	0.00606717	0	49.4634	0.535882	47.5937	0.105928	30	0	1.20379e-08	0.137542	1.4327e-05	0.13145
0.2	0	0.00606717	0	49.4634	0.535882	47.5937	0.105928	30	0	1.71129e-08	0.15296	1.61513e-05	0.143995
0.25	0	0.00606717	0	49.4634	0.535882	47.5937	0.105928	30	0	2.28342e-08	0.170107	1.82078e-05	0.157736
0.3	0	0.00606718	0	49.4634	0.535882	47.5937	0.105928	30	0	2.9284e-08	0.189177	2.05262e-05	0.17279
0.35	0	0.00606718	0	49.4634	0.535882	47.5937	0.105928	30	0	3.65551e-08	0.210384	2.31398e-05	0.18928
0.4	0	0.00606719	0	49.4634	0.535882	47.5937	0.105928	30	0	4.47521e-08	0.233968	2.60863e-05	0.207344
0.45	0	0.00606719	0	49.4634	0.535882	47.5937	0.105928	30	0	5.39928e-08	0.260196	2.94079e-05	0.227131
0.5	0	0.0060672	0	49.4634	0.535882	47.5937	0.105928	30	0	6.44101e-08	0.289365	3.31524e-05	0.248808
0.55	0	0.00606721	0	49.4634	0.535882	47.5937	0.105928	30	0	7.61538e-08	0.321803	3.73738e-05	0.272552
0.6	0	0.00606722	0	49.4634	0.535882	47.5937	0.105928	30	0	8.93928e-08	0.357878	4.21327e-05	0.298563
0.65	0	0.00606723	0	49.4634	0.535883	47.5937	0.105928	30	0	1.04318e-07	0.397997	4.74975e-05	0.327056
0.7	0	0.00606724	0	49.4634	0.535883	47.5937	0.105928	30	0	1.21143e-07	0.442613	5.35454e-05	0.358269
0.75	0	0.00606725	0	49.4634	0.535883	47.5937	0.105928	30	0	1.4011e-07	0.492231	6.03635e-05	0.39246
0.8	0	0.00606726	0	49.4634	0.535883	47.5937	0.105928	30	0	1.61492e-07	0.547412	6.80497e-05	0.429914
0.85	0	0.00606728	0	49.4634	0.535883	47.5937	0.105928	30	0	1.85597e-07	0.608778	7.67145e-05	0.470943
0.9	0	0.0060673	0	49.4634	0.535883	47.5937	0.105929	30	0	2.12771e-07	0.677023	8.64827e-05	0.515887
0.95	0	0.00606732	0	49.4634	0.535883	47.5937	0.105929	30	0	2.43405e-07	0.752918	9.74947e-05	0.56512
1	0	0.00606734	0	49.4634	0.535883	47.5937	0.105929	30	0	2.77939e-07	0.837322	0.000109909	0.619052
1.05	0	0.00606736	0	49.4634	0.535883	47.5937	0.105929	30	0	3.1687e-07	0.931188	0.000123904	0.678131
1.1	0	0.00606739	0	49.4634	0.535883	47.5937	0.105929	30	0	3.60758e-07	1.03558	0.000139681	0.742848
1.15	0	0.00606742	0	49.4634	0.535883	47.5937	0.105929	30	0	4.10234e-07	1.15167	0.000157466	0.813741
1.2	0	0.00606746	0	49.4634	0.535883	47.5937	0.105929	30	0	4.66008e-07	1.28077	0.000177517	0.8914
1.25	0	0.0060675	0	49.4634	0.535883	47.5937	0.105929	30	0	5.28884e-07	1.42435	0.00020012	0.97647
1.3	0	0.00606755	0	49.4634	0.535883	47.5937	0.105929	30	0	5.99764e-07	1.58402	0.000225602	1.06966
1.35	0	0.0060676	0	49.4634	0.535883	47.5937	0.105929	30	0	6.79669e-07	1.76159	0.000254328	1.17174
1.4	0	0.00606766	0	49.4634	0.535883	47.5937	0.105929	30	0	7.69745e-07	1.95907	0.000286712	1.28357
1.45	0	0.00606772	0	49.4634	0.535883	47.5937	0.105929	30	0	8.71289e-07	2.17868	0.00032322	1.40606
1.5	0	0.0060678	0	49.4634	0.535883	47.5937	0.10593	30	0	9.8576e-07	2.42292	0.000364376	1.54025
1.55	0	0.00606788	0	49.4634	0.535884	47.5937	0.10593	30	0	1.1148e-06	2.69453	0.000410773	1.68724
1.6	0	0.00606797	0	49.4634	0.535884	47.5937	0.10593	30	0	1.26027e-06	2.9966	0.000463077	1.84826
1.65	0	0.00606808	0	49.4634	0.535884	47.5937	0.10593	30	0	1.42426e-06	3.33252	0.000522042	2.02465
1.7	0	0.0060682	0	49.4634	0.535884	47.5937	0.105931	30	0	1.60911e-06	3.70611	0.000588514	2.21787
1.75	0	0.00606833	0	49.4634	0.535884	47.5937	0.105931	30	0	1.8175e-06	4.12157	0.000663451	2.42953
1.8	0	0.00606848	0	49.4634	0.535885	47.5937	0.105931	30	0	2.0524e-06	4.5836	0.000747929	2.66139
1.85	0	0.00606865	0	49.4634	0.535885	47.5937	0.105932	30	0	2.3172e-06	5.09744	0.000843165	2.91538
1.9	0	0.00606885	0	49.4634	0.535885	47.5937	0.105932	30	0	2.6157e-06	5.66887	0.000950526	3.19361
1.95	0	0.00606906	0	49.4634	0.535886	47.5937	0.105933	30	0	2.95218e-06	6.30436	0.00107156	3.49839
2	0	0.00606931	0	49.4634	0.535886	47.5937	0.105933	30	0	3.33146e-06	7.01109	0.001208	3.83226
2.05	0	0.00606958	0	49.4634	0.535886	47.5937	0.105934	30	0	3.759e-06	7.79705	0.00136182	4.19798
2.1	0	0.0060699	0	49.4634	0.535887	47.5937	0.105934	30	0	4.24092e-06	8.67112	0.00153522	4.59862
2.15	0	0.00607025	0	49.4634	0.535888	47.5937	0.105935	30	0	4.78414e-06	9.64317	0.0017307	5.03748
2.2	0	0.00607064	0	49.4634	0.535888	47.5937	0.105936	30	0	5.39643e-06	10.7242	0.00195108	5.51823
2.25	0	0.00607109	0	49.4634	0.535889	47.5937	0.105937	30	0	6.08658e-06	11.9264	0.00219951	6.04486
2.3	0	0.00607159	0	49.4634	0.53589	47.5937	0.105938	30	0	6.86446e-06	13.2634	0.00247958	6.62175
2.35	0	0.00607215	0	49.4634	0.535891	47.5937	0.105939	30	0	7.7412e-06	14.7502	0.00279531	7.25369
2.4	0	0.00607279	0	49.4634	0.535892	47.5937	0.105941	30	0	8.72935e-06	16.4037	0.00315124	7.94594
2.45	0	0.00607351	0	49.4634	0.535893	47.5937	0.105943	30	0	9.84303e-06	18.2426	0.00355249	8.70426
2.5	0	0.00607432	0	49.4634	0.535894	47.5937	0.105944	30	0	1.10981e-05	20.2877	0.00400484	9.53494
2.55	0	0.00607523	0	49.4634	0.535896	47.5937	0.105946	30	0	1.25126e-05	22.562	0.00451478	10.4449
2.6	0	0.00607626	0	49.4634	0.535898	47.5937	0.105949	30	0	1.41065e-05	25.0912	0.00508966	11.4417
2.65	0	0.00607742	0	49.4634	0.5359	47.5937	0.105951	30	0	1.59026e-05	27.904	0.00573773	12.5336
2.7	0	0.00607873	0	49.4634	0.535902	47.5937	0.105954	30	0	1.79265e-05	31.0321	0.00646833	13.7298
2.75	0	0.0060802	0	49.4634	0.535904	47.5937	0.105958	30	0	2.02068e-05	34.5108	0.00729195	15.0401
2.8	0	0.00608185	0	49.4634	0.535907	47.5937	0.105961	30	0	2.27759e-05	38.3796	0.00822045	16.4754
2.85	0	0.00608372	0	49.4634	0.53591	47.5937	0.105966	30	0	2.56701e-05	42.682	0.00926717	18.0477
2.9	0	0.00608582	0	49.4634	0.535914	47.5936	0.10597	30	0	2.89303e-05	47.4668	0.0104472	19.7701
2.95	0	0.00608819	0	49.4634	0.535918	47.5936	0.105976	29.9999	0	3.26025e-05	52.7879	0.0117774	21.6568
3	0	0.00609086	0	49.4634	0.535922	47.5936	0.105982	29.9999	0	3.67381e-05	58.7055	0.0132771	23.7237
3.05	0	0.00609387	0	49.4634	0.535927	47.5936	0.105989	29.9999	0	4.13951e-05	65.2865	0.0149677	25.9877
3.1	0	0.00609725	0	49.4634	0.535933	47.5936	0.105996	29.9999	0	4.66386e-05	72.6053	0.0168735	28.4678
3.15	0	0.00610106	0	49.4634	0.535939	47.5936	0.106005	29.9999	0	5.25415e-05	80.7445	0.0190221	31.1846
3.2	0	0.00610534	0	49.4634	0.535947	47.5936	0.106015	29.9999	0	5.91855e-05	89.7961	0.0214442	34.1607
3.25	0	0.00611017	0	49.4634	0.535955	47.5936	0.106026	29.9999	0	6.66622e-05	99.8624	0.0241747	37.4208
3.3	0	0.00611559	0	49.4634	0.535964	47.5936	0.106038	29.9999	0	7.50741e-05	111.057	0.0272529	40.9921
3.35	0	0.0061217	0	49.4633	0.535974	47.5936	0.106052	29.9999	0	8.45358e-05	123.507	0.0307231	44.9041
3.4	0	0.00612856	0	49.4633	0.535986	47.5936	0.106067	29.9998	0	9.51754e-05	137.352	0.0346351	49.1895
3.45	0	0.00613628	0	49.4633	0.535999	47.5936	0.106085	29.9998	0	0.000107136	152.75	0.0390452	53.8839
3.5	0	0.00614495	0	49.4633	0.536013	47.5936	0.106104	29.9998	0	0.000120576	169.873	0.0440169	59.0262
3.55	0	0.00615469	0	49.4633	0.53603	47.5936	0.106126	29.9998	0	0.000135675	188.917	0.0496217	64.6594
3.6	0	0.00616563	0	49.4633	0.536048	47.5935	0.106151	29.9998	0	0.000152627	210.095	0.0559401	70.8301
3.65	0	0.0061779	0	49.4632	0.536069	47.5935	0.106179	29.9997	0	0.000171653	233.647	0.0630631	77.5897
3.7	0	0.00619167	0	49.4632	0.536092	47.5935	0.10621	29.9997	0	0.000192994	259.839	0.071093	84.9945
3.75	0	0.00620711	0	49.4632	0.536118	47.5935	0.106245	29.9997	0	0.000216917	288.967	0.0801454	93.1059
3.8	0	0.0062244	0	49.4632	0.536147	47.5935	0.106284	29.9996	0	0.000243718	321.361	0.0903504	101.991
3.85	0	0.00624375	0	49.4631	0.53618	47.5934	0.106328	29.9996	0	0.000273721	357.386	0.101855	111.725
3.9	0	0.0062654	0	49.4631	0.536216	47.5934	0.106377	29.9995	0	0.00030728	397.45	0.114824	122.387
3.95	0	0.0062896	0	49.4631	0.536257	47.5934	0.106432	29.9994	0	0.000344784	442.005	0.129445	134.067
4	0	0.00631662	0	49.463	0.536302	47.5933	0.106493	29.9994	0	0.000386656	491.555	0.145928	146.862
4.05	0	0.00634674	0	49.463	0.536353	47.5933	0.106561	29.9993	0	0.000433354	546.659	0.164509	160.877
4.1	0	0.0063803	0	49.4629	0.53641	47.5933	0.106637	29.9992	0	0.000485373	607.941	0.185456	176.231
4.15	0	0.00641764	0	49.4628	0.536473	47.5932	0.106721	29.9991	0	0.000543245	676.092	0.20907	193.049
4.2	0	0.00645912	0	49.4628	0.536542	47.5932	0.106815	29.999	0	0.000607539	751.884	0.235692	211.473
4.25	0	0.00650513	0	49.4627	0.53662	47.5931	0.106919	29.9989	0	0.00067886	836.172	0.265703	231.654
4.3	0	0.00655609	0	49.4626	0.536706	47.593	0.107035	29.9988	0	0.000757849	929.908	0.299535	253.762
4.35	0	0.00661244	0	49.4625	0.536801	47.593	0.107162	29.9986	0	0.000845177	1034.15	0.337675	277.98
4.4	0	0.00667461	0	49.4624	0.536905	47.5929	0.107303	29.9985	0	0.000941547	1150.08	0.380672	304.509
4.45	0	0.00674309	0	49.4623	0.537021	47.5928	0.107458	29.9983	0	0.00104768	1279.01	0.429144	333.569
4.5	0	0.00681835	0	49.4621	0.537147	47.5927	0.107628	29.9981	0	0.00116434	1422.39	0.483788	365.403
4.55	0	0.00690089	0	49.462	0.537286	47.5926	0.107815	29.9979	0	0.00129228	1581.84	0.545389	400.275
4.6	0	0.0069912	0	49.4618	0.537438	47.5925	0.108019	29.9977	0	0.00143227	1759.17	0.614834	438.475
4.65	0	0.00708979	0	49.4617	0.537605	47.5924	0.108242	29.9975	0	0.00158508	1956.38	0.693122	480.321
4.7	0	0.00719716	0	49.4615	0.537785	47.5922	0.108485	29.9972	0	0.00175151	2175.69	0.781379	526.16
4.75	0	0.0073138	0	49.4613	0.537982	47.5921	0.108749	29.9969	0	0.0019323	2419.59	0.880873	576.374
4.8	0	0.00744019	0	49.4611	0.538195	47.5919	0.109035	29.9966	0	0.0021282	2690.83	0.993036	631.38
4.85	0	0.00757681	0	49.4608	0.538425	47.5917	0.109345	29.9962	0	0.00233996	2992.48	1.11948	691.635
4.9	0	0.0077241	0	49.4606	0.538673	47.5915	0.109678	29.9959	0	0.00256826	3327.94	1.26203	757.641
4.95	0	0.0078825	0	49.4603	0.538939	47.5913	0.110036	29.9955	0	0.00281378	3701.01	1.42272	829.945
5	0	0.00805244	0	49.46	0.539226	47.5911	0.110421	29.9951	0	0.00307719	4115.9	1.60388	909.151
5.05	0	0.00823431	0	49.4597	0.539532	47.5909	0.110832	29.9946	0	0.00335908	4577.31	1.8081	995.915
5.1	0	0.00842848	0	49.4593	0.539859	47.5906	0.111272	29.9941	0	0.00366005	5090.43	2.03833	1090.96
5.15	0	0.00863533	0	49.459	0.540207	47.5904	0.11174	29.9936	0	0.00398066	5661.08	2.29788	1195.07
5.2	0	0.00885519	0	49.4586	0.540577	47.5901	0.112238	29.9931	0	0.00432145	6295.7	2.59047	1309.13
5.25	0	0.0090884	0	49.4582	0.54097	47.5898	0.112765	29.9925	0	0.00468292	7001.46	2.92032	1434.06
5.3	0	0.00933528	0	49.4578	0.541386	47.5894	0.113324	29.9919	0	0.00506559	7786.34	3.29217	1570.92
5.35	0	0.00959615	0	49.4573	0.541825	47.5891	0.113914	29.9912	0	0.00546993	8659.2	3.71137	1720.84
5.4	0	0.00987131	0	49.4568	0.542289	47.5888	0.114537	29.9905	0	0.00589643	9629.92	4.18394	1885.07
5.45	0	0.0101611	0	49.4563	0.542777	47.5884	0.115193	29.9898	0	0.00634557	10709.5	4.71669	2064.97
5.5	0	0.0104658	0	49.4558	0.54329	47.588	0.115882	29.9891	0	0.00681782	11910	5.31728	2262.04
5.55	0	0.0107857	0	49.4552	0.543828	47.5876	0.116606	29.9883	0	0.00731369	13245.1	5.99434	2477.91
5.6	0	0.0111211	0	49.4546	0.544393	47.5871	0.117365	29.9874	0	0.00783368	14729.9	6.75761	2714.39
5.65	0	0.0114725	0	49.454	0.544985	47.5867	0.118161	29.9866	0	0.00837831	16381.2	7.61806	2973.44
5.7	0	0.0118401	0	49.4534	0.545604	47.5862	0.118992	29.9857	0	0.00894813	18217.6	8.58809	3257.2
5.75	0	0.0122244	0	49.4527	0.546251	47.5857	0.119862	29.9847	0	0.00954373	20259.8	9.68162	3568.05
5.8	0	0.0126257	0	49.452	0.546927	47.5852	0.12077	29.9837	0	0.0101657	22531	10.9144	3908.57
5.85	0	0.0130444	0	49.4513	0.547632	47.5847	0.121718	29.9827	0	0.0108147	25056.7	12.3042	4281.58
5.9	0	0.0134809	0	49.4505	0.548367	47.5841	0.122705	29.9816	0	0.0114913	27865.6	13.8709	4690.19
5.95	0	0.0139358	0	49.4497	0.549133	47.5835	0.123735	29.9804	0	0.0121963	30989.4	15.6371	5137.8
6	0	0.0144094	0	49.4489	0.549931	47.5829	0.124807	29.9793	0	0.0129305	34463.4	17.6282	5628.12
6.05	0	0.0149024	0	49.4481	0.550761	47.5823	0.125922	29.978	0	0.0136945	38326.9	19.8728	6165.23
6.1	0	0.0154151	0	49.4472	0.551624	47.5816	0.127083	29.9768	0	0.0144894	42623.4	22.4032	6753.61
6.15	0	0.0159483	0	49.4462	0.552522	47.5809	0.128289	29.9754	0	0.0153158	47401.5	25.2559	7398.13
6.2	0	0.0165025	0	49.4453	0.553455	47.5802	0.129543	29.9741	0	0.0161748	52715.4	28.4717	8104.17
6.25	0	0.0170783	0	49.4443	0.554425	47.5794	0.130846	29.9726	0	0.0170672	58624.9	32.0971	8877.59
6.3	0	0.0176763	0	49.4432	0.555432	47.5787	0.1322	29.9712	0	0.0179942	65196.8	36.1841	9724.81
6.35	0	0.0182974	0	49.4422	0.556478	47.5779	0.133605	29.9696	0	0.0189568	72505.5	40.7914	10652.9
6.4	0	0.018942	0	49.441	0.557564	47.577	0.135064	29.968	0	0.0199561	80633.5	45.9855	11669.5
6.45	0	0.0196111	0	49.4399	0.55869	47.5762	0.136578	29.9663	0	0.0209932	89672.7	51.8409	12783.2
6.5	0	0.0203055	0	49.4387	0.55986	47.5753	0.138149	29.9646	0	0.0220694	99725	58.4417	14003.2
6.55	0	0.0210258	0	49.4374	0.561073	47.5743	0.13978	29.9628	0	0.0231859	100001	65.8834	15339.6
6.6	0	0.021773	0	49.4361	0.562331	47.5734	0.141471	29.961	0	0.0243441	100001	74.2723	16803.5
6.65	0	0.022548	0	49.4348	0.563636	47.5724	0.143224	29.959	0	0.0255453	100001	83.7294	18407.1
6.7	0	0.0233517	0	49.4334	0.56499	47.5713	0.145043	29.957	0	0.026791	100001	94.3909	20163.8
6.75	0	0.0241851	0	49.4319	0.566393	47.5703	0.146929	29.955	0	0.0280828	100001	106.41	22088.2
6.8	0	0.0250491	0	49.4304	0.567848	47.5691	0.148884	29.9528	0	0.029422	100001	119.959	24196.1
6.85	0	0.0259449	0	49.4288	0.569356	47.568	0.150911	29.9506	0	0.0308104	100001	135.234	26505.2
6.9	0	0.0268734	0	49.4272	0.57092	47.5668	0.153013	29.9483	0	0.0322497	100001	152.453	29034.7
6.95	0	0.0278359	0	49.4256	0.572541	47.5655	0.155191	29.9459	0	0.0337416	100001	171.864	31805.6
7	0	0.0288336	0	49.4238	0.574221	47.5643	0.157449	29.9434	0	0.0352879	100001	193.748	34841
7.05	0	0.0298675	0	49.422	0.575962	47.5629	0.159788	29.9409	0	0.0368905	100001	218.418	38166
7.1	0	0.0309391	0	49.4202	0.577767	47.5615	0.162213	29.9382	0	0.0385514	100001	246.229	41808.3
7.15	0	0.0320495	0	49.4182	0.579637	47.5601	0.164726	29.9354	0	0.0402727	100001	277.582	45798.2
7.2	0	0.0332003	0	49.4162	0.581575	47.5586	0.16733	29.9326	0	0.0420563	100001	312.926	50168.9
7.25	0	0.0343927	0	49.4141	0.583583	47.5571	0.170029	29.9296	0	0.0439046	100001	352.77	54956.7
7.3	0	0.0356283	0	49.412	0.585663	47.5555	0.172825	29.9265	0	0.0458197	100001	397.687	60201.4
7.35	0	0.0369085	0	49.4098	0.587819	47.5538	0.175722	29.9234	0	0.0478042	100001	448.324	65946.6
7.4	0	0.0382351	0	49.4075	0.590053	47.5521	0.178724	29.9201	0	0.0498603	100001	505.408	72240.2
7.45	0	0.0396095	0	49.4051	0.592368	47.5503	0.181834	29.9166	0	0.0519906	100001	569.761	79134.3
7.5	0	0.0410334	0	49.4026	0.594766	47.5485	0.185057	29.9131	0	0.0541977	100001	642.307	86686.3
7.55	0	0.0425088	0	49.4	0.59725	47.5466	0.188396	29.9094	0	0.0564845	100001	724.091	94959.1
7.6	0	0.0440372	0	49.3974	0.599824	47.5446	0.191854	29.9056	0	0.0588536	100001	816.288	100003
7.65	0	0.0456207	0	49.3946	0.602491	47.5426	0.195438	29.9017	0	0.061308	100001	920.226	100003
7.7	0	0.0472612	0	49.3917	0.605253	47.5404	0.19915	29.8976	0	0.0638508	100001	1037.4	100003
7.75	0	0.0489607	0	49.3888	0.608115	47.5383	0.202996	29.8934	0	0.066485	100001	1169.5	100003
7.8	0	0.0507213	0	49.3857	0.61108	47.536	0.20698	29.889	0	0.0692139	100001	1318.41	100003
7.85	0	0.0525451	0	49.3825	0.614151	47.5336	0.211108	29.8845	0	0.0720408	100001	1486.28	100003
7.9	0	0.0544345	0	49.3793	0.617333	47.5312	0.215383	29.8798	0	0.0749693	100001	1675.53	100003
7.95	0	0.0563917	0	49.3759	0.620629	47.5287	0.219813	29.8749	0	0.078003	100001	1888.87	100003
8	0	0.0584191	0	49.3723	0.624043	47.526	0.224401	29.8699	0	0.0811455	100001	2129.38	100003
8.05	0	0.0605192	0	49.3687	0.62758	47.5233	0.229153	29.8647	0	0.0844007	100001	2400.51	100003
8.1	0	0.0626947	0	49.3649	0.631243	47.5205	0.234076	29.8593	0	0.0877726	100001	2706.17	100003
8.15	0	0.0649481	0	49.361	0.635038	47.5176	0.239176	29.8537	0	0.0912655	100001	3050.75	100003
8.2	0	0.0672823	0	49.3569	0.638969	47.5146	0.244458	29.8479	0	0.0948834	100001	3439.2	100003
8.25	0	0.0697	0	49.3527	0.64304	47.5115	0.249929	29.8419	0	0.0986309	100001	3877.11	100003
8.3	0	0.0722043	0	49.3483	0.647257	47.5082	0.255597	29.8356	0	0.102513	100001	4370.77	100003
8.35	0	0.0747983	0	49.3438	0.651626	47.5049	0.261467	29.8292	0	0.106533	100001	4927.3	100003
8.4	0	0.077485	0	49.3391	0.65615	47.5014	0.267547	29.8225	0	0.110698	100001	5554.68	100003
8.45	0	0.0802678	0	49.3343	0.660836	47.4978	0.273844	29.8156	0	0.115011	100001	6261.94	100003
8.5	0	0.08315	0	49.3293	0.66569	47.4941	0.280367	29.8084	0	0.119478	100001	7059.26	100003
8.55	0	0.0861352	0	49.3241	0.670717	47.4902	0.287122	29.801	0	0.124105	100001	7958.1	100003
8.6	0	0.089227	0	49.3187	0.675924	47.4862	0.294119	29.7933	0	0.128898	100001	8971.39	100003
8.65	0	0.0924292	0	49.3131	0.681316	47.4821	0.301366	29.7854	0	0.133861	100001	10113.7	100003
8.7	0	0.0957456	0	49.3074	0.686901	47.4778	0.308871	29.7771	0	0.139002	100001	11401.5	100003
8.75	0	0.0991803	0	49.3014	0.692685	47.4734	0.316643	29.7686	0	0.144325	100001	12853.2	100003
8.8	0	0.102737	0	49.2952	0.698675	47.4688	0.324693	29.7598	0	0.149839	100001	14489.8	100003
8.85	0	0.106421	0	49.2888	0.704879	47.464	0.33303	29.7506	0	0.155549	100001	16334.7	100003
8.9	0	0.110236	0	49.2821	0.711303	47.4591	0.341663	29.7411	0	0.161462	100001	18414.6	100003
8.95	0	0.114187	0	49.2753	0.717956	47.454	0.350604	29.7313	0	0.167586	100001	20759.3	100003
9	0	0.118278	0	49.2681	0.724846	47.4487	0.359862	29.7212	0	0.173928	100001	23402.5	100003
9.05	0	0.122515	0	49.2608	0.731981	47.4433	0.36945	29.7106	0	0.180495	100001	26382.3	100003
9.1	0	0.126903	0	49.2531	0.739369	47.4376	0.379379	29.6997	0	0.187295	100001	29741.5	100003
9.15	0	0.131446	0	49.2452	0.74702	47.4317	0.38966	29.6884	0	0.194337	100001	33528.4	100003
9.2	0	0.13615	0	49.237	0.754942	47.4257	0.400306	29.6767	0	0.201629	100001	37797.5	100003
9.25	0	0.141021	0	49.2285	0.763145	47.4194	0.411329	29.6646	0	0.209179	100001	42610.2	100003
9.3	0	0.146065	0	49.2198	0.771639	47.4129	0.422743	29.6521	0	0.216997	100001	48035.6	100003
9.35	0	0.151288	0	49.2107	0.780433	47.4061	0.434562	29.6391	0	0.225092	100001	54151.9	100003
9.4	0	0.156695	0	49.2013	0.789539	47.3992	0.446799	29.6257	0	0.233473	100001	61047	100003
9.45	0	0.162293	0	49.1915	0.798967	47.3919	0.459468	29.6118	0	0.242151	100001	68820	100003
9.5	0	0.16809	0	49.1814	0.808728	47.3845	0.472585	29.5974	0	0.251135	100001	77582.7	100003
9.55	0	0.174091	0	49.171	0.818834	47.3767	0.486166	29.5825	0	0.260437	100001	87461.1	100003
9.6	0	0.180304	0	49.1602	0.829296	47.3687	0.500225	29.567	0	0.270066	100001	98597.3	100003
9.65	0	0.186735	0	49.149	0.840128	47.3604	0.514781	29.551	0	0.280036	100001	100002	100003
9.7	0	0.193394	0	49.1374	0.851341	47.3518	0.529849	29.5345	0	0.290357	100001	100002	100003
9.75	0	0.200287	0	49.1254	0.862948	47.3429	0.545447	29.5174	0	0.301041	100001	100002	100003
9.8	0	0.207422	0	49.1129	0.874964	47.3337	0.561594	29.4996	0	0.3121	100001	100002	100003
9.85	0	0.214808	0	49.1001	0.887401	47.3242	0.578308	29.4813	0	0.323548	100001	100002	100003
9.9	0	0.222453	0	49.0868	0.900275	47.3144	0.595608	29.4623	0	0.335397	100001	100002	100003
9.95	0	0.230366	0	49.073	0.913601	47.3042	0.613516	29.4426	0	0.347663	100001	100002	100003
10	0	0.238556	0	49.0587	0.927393	47.2936	0.63205	29.4223	0	0.360357	100001	100002	100003
10.05	0	0.247033	0	49.044	0.941668	47.2827	0.651233	29.4012	0	0.373496	100001	100002	100003
10.1	0	0.255805	0	49.0287	0.956441	47.2714	0.671086	29.3794	0	0.387094	100001	100002	100003
10.15	0	0.264884	0	49.0129	0.971731	47.2597	0.691632	29.3568	0	0.401167	100001	100002	100003
10.2	0	0.27428	0	48.9966	0.987552	47.2476	0.712893	29.3335	0	0.415729	100001	100002	100003
10.25	0	0.284002	0	48.9796	1.00392	47.235	0.734895	29.3093	0	0.430799	100001	100002	100003
10.3	0	0.294062	0	48.9621	1.02087	47.2221	0.757661	29.2843	0	0.446393	100001	100002	100003
10.35	0	0.304472	0	48.944	1.0384	47.2087	0.781218	29.2585	0	0.462528	100001	100002	100003
10.4	0	0.315242	0	48.9252	1.05653	47.1948	0.805591	29.2317	0	0.479221	100001	100002	100003
10.45	0	0.326385	0	48.9058	1.0753	47.1804	0.830808	29.204	0	0.496493	100001	100002	100003
10.5	0	0.337913	0	48.8858	1.09471	47.1656	0.856896	29.1754	0	0.514362	100001	100002	100003
10.55	0	0.349839	0	48.865	1.11479	47.1502	0.883885	29.1457	0	0.532847	100001	100002	100003
10.6	0	0.362176	0	48.8435	1.13557	47.1344	0.911802	29.1151	0	0.551969	100001	100002	100003
10.65	0	0.374937	0	48.8213	1.15706	47.1179	0.94068	29.0834	0	0.571748	100001	100002	100003
10.7	0	0.388136	0	48.7983	1.17929	47.101	0.970549	29.0506	0	0.592206	100001	100002	100003
10.75	0	0.401787	0	48.7745	1.20227	47.0834	1.00144	29.0166	0	0.613365	100001	100002	100003
10.8	0	0.415904	0	48.7499	1.22605	47.0652	1.03339	28.9816	0	0.635248	100001	100002	100003
10.85	0	0.430504	0	48.7245	1.25063	47.0464	1.06643	28.9453	0	0.657877	100001	100002	100003
10.9	0	0.445601	0	48.6982	1.27606	47.027	1.10059	28.9078	0	0.681277	100001	100002	100003
10.95	0	0.46121	0	48.671	1.30234	47.007	1.13592	28.869	0	0.705472	100001	100002	100003
11	0	0.477349	0	48.6429	1.32952	46.9862	1.17244	28.8289	0	0.730487	100001	100002	100003
11.05	0	0.494034	0	48.6139	1.35762	46.9648	1.2102	28.7874	0	0.756349	100001	100002	100003
11.1	0	0.511282	0	48.5838	1.38666	46.9426	1.24923	28.7445	0	0.783084	100001	100002	100003
11.15	0	0.529111	0	48.5528	1.41669	46.9197	1.28958	28.7002	0	0.810718	100001	100002	100003
11.2	0	0.547538	0	48.5207	1.44772	46.896	1.33128	28.6544	0	0.83928	100001	100002	100003
11.25	0	0.566583	0	48.4875	1.47979	46.8715	1.37437	28.6071	0	0.868799	100001	100002	100003
11.3	0	0.586263	0	48.4532	1.51293	46.8463	1.41891	28.5582	0	0.899303	100001	100002	100003
11.35	0	0.606598	0	48.4178	1.54718	46.8202	1.46493	28.5077	0	0.930823	100001	100002	100003
11.4	0	0.627608	0	48.3812	1.58256	46.7932	1.51248	28.4555	0	0.963389	100001	100002	100003
11.45	0	0.649314	0	48.3434	1.61911	46.7654	1.5616	28.4015	0	0.997032	100001	100002	100003
11.5	0	0.671736	0	48.3044	1.65687	46.7366	1.61234	28.3458	0	1.03179	100001	100002	100003
11.55	0	0.694895	0	48.264	1.69587	46.7069	1.66474	28.2883	0	1.06768	100001	100002	100003
11.6	0	0.718812	0	48.2223	1.73615	46.6762	1.71887	28.2288	0	1.10476	100001	100002	100003
11.65	0	0.743511	0	48.1793	1.77774	46.6446	1.77476	28.1675	0	1.14304	100001	100002	100003
11.7	0	0.769014	0	48.1349	1.82068	46.6119	1.83248	28.1041	0	1.18257	100001	100002	100003
11.75	0	0.795343	0	48.089	1.86502	46.5781	1.89206	28.0387	0	1.22338	100001	100002	100003
11.8	0	0.822521	0	48.0416	1.91079	46.5433	1.95356	27.9711	0	1.2655	100001	100002	100003
11.85	0	0.850574	0	47.9928	1.95803	46.5074	2.01705	27.9014	0	1.30899	100001	100002	100003
11.9	0	0.879524	0	47.9423	2.00678	46.4704	2.08256	27.8295	0	1.35386	100001	100002	100003
11.95	0	0.909397	0	47.8903	2.05709	46.4321	2.15016	27.7552	0	1.40016	100001	100002	100003
12	0	0.940217	0	47.8366	2.10899	46.3927	2.21991	27.6786	0	1.44793	100001	100002	100003
12.05	0	0.972009	0	47.7811	2.16253	46.3521	2.29186	27.5996	0	1.49721	100001	100002	100003
12.1	0	1.0048	0	47.724	2.21775	46.3102	2.36606	27.5181	0	1.54804	100001	100002	100003
12.15	0	1.03862	0	47.6651	2.2747	46.267	2.44259	27.4341	0	1.60045	100001	100002	100003
12.2	0	1.07348	0	47.6043	2.33341	46.2224	2.52149	27.3475	0	1.65449	100001	100002	100003
12.25	0	1.10943	0	47.5416	2.39394	46.1766	2.60283	27.2582	0	1.71021	100001	100002	100003
12.3	0	1.14647	0	47.477	2.45633	46.1293	2.68667	27.1661	0	1.76763	100001	100002	100003
12.35	0	1.18465	0	47.4105	2.52062	46.0806	2.77307	27.0712	0	1.82681	100001	100002	100003
12.4	0	1.22399	0	47.3419	2.58687	46.0304	2.86209	26.9735	0	1.88778	100001	100002	100003
12.45	0	1.26451	0	47.2712	2.65511	45.9788	2.95379	26.8728	0	1.95059	100001	100002	100003
12.5	0	1.30625	0	47.1985	2.72539	45.9256	3.04824	26.769	0	2.01529	100001	100002	100003
12.55	0	1.34923	0	47.1235	2.79777	45.8709	3.1455	26.6622	0	2.0819	100001	100002	100003
12.6	0	1.39347	0	47.0464	2.87228	45.8146	3.24563	26.5523	0	2.15048	100001	100002	100003
12.65	0	1.43902	0	46.967	2.94897	45.7567	3.34869	26.4391	0	2.22107	100001	100002	100003
12.7	0	1.48588	0	46.8852	3.02789	45.6971	3.45475	26.3227	0	2.29371	100001	100002	100003
12.75	0	1.5341	0	46.8011	3.10908	45.6359	3.56386	26.2028	0	2.36845	100001	100002	100003
12.8	0	1.58369	0	46.7146	3.1926	45.5729	3.67609	26.0796	0	2.44532	100001	100002	100003
12.85	0	1.63469	0	46.6257	3.27848	45.5082	3.7915	25.9529	0	2.52436	100001	100002	100003
12.9	0	1.68712	0	46.5342	3.36677	45.4417	3.91014	25.8226	0	2.60562	100001	100002	100003
12.95	0	1.741	0	46.4402	3.45751	45.3734	4.03208	25.6887	0	2.68915	100001	100002	100003
13	0	1.79637	0	46.3436	3.55075	45.3033	4.15738	25.5511	0	2.77497	100001	100002	100003
13.05	0	1.85324	0	46.2443	3.64652	45.2313	4.28608	25.4098	0	2.86312	100001	100002	100003
13.1	0	1.91165	0	46.1424	3.74488	45.1575	4.41825	25.2646	0	2.95365	100001	100002	100003
13.15	0	1.97161	0	46.0378	3.84585	45.0817	4.55394	25.1156	0	3.04659	100001	100002	100003
13.2	0	2.03314	0	45.9303	3.94948	45.004	4.6932	24.9627	0	3.14197	100001	100002	100003
13.25	0	2.09628	0	45.8201	4.0558	44.9243	4.83608	24.8058	0	3.23983	100001	100002	100003
13.3	0	2.16103	0	45.7071	4.16485	44.8426	4.98262	24.6449	0	3.3402	100001	100002	100003
13.35	0	2.22743	0	45.5912	4.27665	44.7589	5.13287	24.4799	0	3.44311	100001	100002	100003
13.4	0	2.29548	0	45.4723	4.39125	44.6733	5.28687	24.3108	0	3.54859	100001	100002	100003
13.45	0	2.3652	0	45.3506	4.50867	44.5855	5.44465	24.1375	0	3.65666	100001	100002	100003
13.5	0	2.43662	0	45.2259	4.62893	44.4958	5.60626	23.9601	0	3.76735	100001	100002	100003
13.55	0	2.50973	0	45.0982	4.75205	44.404	5.77172	23.7784	0	3.88068	100001	100002	100003
13.6	0	2.58456	0	44.9674	4.87807	44.3101	5.94106	23.5924	0	3.99667	100001	100002	100003
13.65	0	2.66111	0	44.8337	5.00698	44.2141	6.1143	23.4022	0	4.11532	100001	100002	100003
13.7	0	2.7394	0	44.6969	5.13881	44.116	6.29146	23.2077	0	4.23666	100001	100002	100003
13.75	0	2.81942	0	44.5571	5.27357	44.0159	6.47255	23.0088	0	4.3607	100001	100002	100003
13.8	0	2.90118	0	44.4142	5.41126	43.9137	6.65758	22.8056	0	4.48743	100001	100002	100003
13.85	0	2.98469	0	44.2682	5.55188	43.8094	6.84655	22.5981	0	4.61687	100001	100002	100003
13.9	0	3.06994	0	44.1192	5.69544	43.7031	7.03947	22.3863	0	4.749	100001	100002	100003
13.95	0	3.15692	0	43.9671	5.84192	43.5947	7.23631	22.1701	0	4.88382	100001	100002	100003
14	0	3.24563	0	43.812	5.99131	43.4843	7.43706	21.9497	0	5.02133	100001	100002	100003
14.05	0	3.33607	0	43.6539	6.1436	43.3718	7.64171	21.725	0	5.1615	100001	100002	100003
14.1	0	3.42821	0	43.4927	6.29876	43.2574	7.85023	21.496	0	5.30431	100001	100002	100003
14.15	0	3.52204	0	43.3286	6.45678	43.141	8.06257	21.2628	0	5.44975	100001	100002	100003
14.2	0	3.61754	0	43.1615	6.61761	43.0226	8.2787	21.0255	0	5.59779	100001	100002	100003
14.25	0	3.7147	0	42.9915	6.78121	42.9024	8.49856	20.7841	0	5.74837	100001	100002	100003
14.3	0	3.81347	0	42.8186	6.94756	42.7803	8.72209	20.5386	0	5.90148	100001	100002	100003
14.35	0	3.91385	0	42.6429	7.11659	42.6564	8.94924	20.2892	0	6.05706	100001	100002	100003
14.4	0	4.01579	0	42.4645	7.28825	42.5307	9.17992	20.0358	0	6.21506	100001	100002	100003
14.45	0	4.11925	0	42.2833	7.46248	42.4033	9.41406	19.7787	0	6.37543	100001	100002	100003
14.5	0	4.2242	0	42.0995	7.63921	42.2742	9.65156	19.5179	0	6.5381	100001	100002	100003
14.55	0	4.33059	0	41.9132	7.81838	42.1436	9.89232	19.2536	0	6.70301	100001	100002	100003
14.6	0	4.43837	0	41.7244	7.99989	42.0114	10.1362	18.9857	0	6.87008	100001	100002	100003
14.65	0	4.5475	0	41.5332	8.18366	41.8778	10.3832	18.7145	0	7.03923	100001	100002	100003
14.7	0	4.65792	0	41.3397	8.3696	41.7427	10.6331	18.4401	0	7.21037	100001	100002	100003
14.75	0	4.76957	0	41.144	8.55761	41.6064	10.8857	18.1627	0	7.38342	100001	100002	100003
14.8	0	4.88238	0	40.9463	8.74759	41.4688	11.141	17.8824	0	7.55829	100001	100002	100003
14.85	0	4.9963	0	40.7466	8.93943	41.3301	11.3988	17.5993	0	7.73485	100001	100002	100003
14.9	0	5.11124	0	40.545	9.133	41.1904	11.6589	17.3136	0	7.91302	100001	100002	100003
14.95	0	5.22715	0	40.3417	9.32819	41.0497	11.9212	17.0256	0	8.09268	100001	100002	100003
15	0	5.34394	0	40.1368	9.52486	40.9081	12.1855	16.7354	0	8.2737	100001	100002	100003
15.05	0	5.46153	0	39.9305	9.72289	40.7658	12.4516	16.4432	0	8.45597	100001	100002	100003
15.1	0	5.57985	0	39.7229	9.92213	40.6228	12.7194	16.1491	0	8.63936	100001	100002	100003
15.15	0	5.69881	0	39.5141	10.1225	40.4793	12.9886	15.8535	0	8.82374	100001	100002	100003
15.2	0	5.81831	0	39.3043	10.3237	40.3354	13.259	15.5566	0	9.00898	100001	100002	100003
15.25	0	5.93828	0	39.0937	10.5257	40.1911	13.5305	15.2585	0	9.19492	100001	100002	100003
15.3	0	6.05861	0	38.8823	10.7284	40.0467	13.8028	14.9594	0	9.38144	100001	100002	100003
15.35	0	6.17922	0	38.6705	10.9315	39.9021	14.0758	14.6597	0	9.56839	100001	100002	100003
15.4	0	6.30001	0	38.4583	11.1349	39.7576	14.3491	14.3595	0	9.75561	100001	100002	100003
15.45	0	6.42089	0	38.2459	11.3384	39.6132	14.6227	14.0592	0	9.94297	100001	100002	100003
15.5	0	6.54175	0	38.0335	11.542	39.469	14.8962	13.7588	0	10.1303	100001	100002	100003
15.55	0	6.6625	0	37.8212	11.7453	39.3253	15.1694	13.4588	0	10.3175	100001	100002	100003
15.6	0	6.78304	0	37.6093	11.9483	39.182	15.4422	13.1592	0	10.5043	100001	100002	100003
15.65	0	6.90327	0	37.3979	12.1508	39.0393	15.7143	12.8605	0	10.6907	100001	100002	100003
15.7	0	7.02309	0	37.1871	12.3526	38.8973	15.9855	12.5627	0	10.8764	100001	100002	100003
15.75	0	7.14242	0	36.9772	12.5535	38.7562	16.2555	12.2662	0	11.0613	100001	100002	100003
15.8	0	7.26114	0	36.7683	12.7534	38.616	16.5241	11.9712	0	11.2454	100001	100002	100003
15.85	0	7.37916	0	36.5606	12.9522	38.4769	16.7912	11.6779	0	11.4283	100001	100002	100003
15.9	0	7.49639	0	36.3542	13.1496	38.3389	17.0565	11.3865	0	11.61	100001	100002	100003
15.95	0	7.61274	0	36.1494	13.3455	38.2022	17.3198	11.0974	0	11.7904	100001	100002	100003
16	0	7.72813	0	35.9462	13.5398	38.0669	17.5809	10.8107	0	11.9692	100001	100002	100003
16.05	0	7.84245	0	35.7449	13.7323	37.933	17.8397	10.5266	0	12.1464	100001	100002	100003
16.1	0	7.95563	0	35.5455	13.9229	37.8007	18.0958	10.2453	0	12.3218	100001	100002	100003
16.15	0	8.06758	0	35.3482	14.1115	37.67	18.3491	9.96714	0	12.4953	100001	100002	100003
16.2	0	8.17823	0	35.1532	14.2978	37.5411	18.5995	9.69217	0	12.6669	100001	100002	100003
16.25	0	8.28751	0	34.9606	14.4818	37.414	18.8468	9.42062	0	12.8362	100001	100002	100003
16.3	0	8.39534	0	34.7706	14.6634	37.2887	19.0908	9.15266	0	13.0034	100001	100002	100003
16.35	0	8.50165	0	34.5831	14.8424	37.1654	19.3314	8.88848	0	13.1682	100001	100002	100003
16.4	0	8.60638	0	34.3984	15.0188	37.0441	19.5684	8.62821	0	13.3305	100001	100002	100003
16.45	0	8.70948	0	34.2166	15.1924	36.9249	19.8018	8.37201	0	13.4903	100001	100002	100003
16.5	0	8.81089	0	34.0377	15.3632	36.8079	20.0312	8.12002	0	13.6475	100001	100002	100003
16.55	0	8.91056	0	33.8619	15.531	36.693	20.2568	7.87235	0	13.802	100001	100002	100003
16.6	0	9.00843	0	33.6891	15.6959	36.5803	20.4783	7.62912	0	13.9537	100001	100002	100003
16.65	0	9.10448	0	33.5196	15.8576	36.4699	20.6956	7.39043	0	14.1025	100001	100002	100003
16.7	0	9.19867	0	33.3534	16.0162	36.3618	20.9088	7.15638	0	14.2485	100001	100002	100003
16.75	0	9.29096	0	33.1904	16.1716	36.256	21.1176	6.92705	0	14.3916	100001	100002	100003
16.8	0	9.38132	0	33.0309	16.3238	36.1526	21.3221	6.70249	0	14.5316	100001	100002	100003
16.85	0	9.46973	0	32.8747	16.4727	36.0515	21.5222	6.48279	0	14.6687	100001	100002	100003
16.9	0	9.55618	0	32.722	16.6183	35.9529	21.7178	6.26797	0	14.8027	100001	100002	100003
16.95	0	9.64064	0	32.5728	16.7605	35.8566	21.909	6.05808	0	14.9336	100001	100002	100003
17	0	9.72311	0	32.4271	16.8994	35.7627	22.0956	5.85314	0	15.0614	100001	100002	100003
17.05	0	9.80358	0	32.2849	17.0349	35.6712	22.2777	5.65318	0	15.1861	100001	100002	100003
17.1	0	9.88205	0	32.1463	17.167	35.5821	22.4553	5.45819	0	15.3078	100001	100002	100003
17.15	0	9.95851	0	32.0111	17.2958	35.4953	22.6283	5.26819	0	15.4263	100001	100002	100003
17.2	0	10.033	0	31.8795	17.4212	35.411	22.7968	5.08315	0	15.5417	100001	100002	100003
17.25	0	10.1054	0	31.7514	17.5432	35.3289	22.9608	4.90306	0	15.654	100001	100002	100003
17.3	0	10.1759	0	31.6267	17.6619	35.2492	23.1203	4.72789	0	15.7633	100001	100002	100003
17.35	0	10.2445	0	31.5056	17.7773	35.1718	23.2754	4.55761	0	15.8695	100001	100002	100003
17.4	0	10.311	0	31.3878	17.8894	35.0967	23.4261	4.39217	0	15.9727	100001	100002	100003
17.45	0	10.3757	0	31.2735	17.9983	35.0239	23.5723	4.23153	0	16.0729	100001	100002	100003
17.5	0	10.4384	0	31.1625	18.1039	34.9533	23.7143	4.07564	0	16.1701	100001	100002	100003
17.55	0	10.4993	0	31.0548	18.2064	34.8848	23.852	3.92443	0	16.2644	100001	100002	100003
17.6	0	10.5582	0	30.9505	18.3058	34.8185	23.9855	3.77784	0	16.3559	100001	100002	100003
17.65	0	10.6154	0	30.8493	18.402	34.7544	24.1149	3.63579	0	16.4445	100001	100002	100003
17.7	0	10.6708	0	30.7514	18.4952	34.6923	24.2401	3.49823	0	16.5303	100001	100002	100003
17.75	0	10.7244	0	30.6565	18.5855	34.6322	24.3614	3.36506	0	16.6133	100001	100002	100003
17.8	0	10.7762	0	30.5647	18.6728	34.5741	24.4788	3.23621	0	16.6937	100001	100002	100003
17.85	0	10.8264	0	30.476	18.7572	34.518	24.5922	3.11159	0	16.7714	100001	100002	100003
17.9	0	10.8748	0	30.3901	18.8389	34.4638	24.7019	2.99111	0	16.8466	100001	100002	100003
17.95	0	10.9217	0	30.3072	18.9178	34.4115	24.808	2.8747	0	16.9192	100001	100002	100003
18	0	10.9669	0	30.2271	18.994	34.361	24.9104	2.76225	0	16.9893	100001	100002	100003
18.05	0	11.0106	0	30.1497	19.0676	34.3122	25.0092	2.65367	0	17.0571	100001	100002	100003
18.1	0	11.0528	0	30.075	19.1386	34.2652	25.1047	2.54887	0	17.1224	100001	100002	100003
18.15	0	11.0935	0	30.003	19.2071	34.2199	25.1968	2.44776	0	17.1855	100001	100002	100003
18.2	0	11.1327	0	29.9335	19.2732	34.1762	25.2856	2.35024	0	17.2463	100001	100002	100003
18.25	0	11.1706	0	29.8664	19.3369	34.1341	25.3712	2.25621	0	17.305	100001	100002	100003
18.3	0	11.207	0	29.8019	19.3983	34.0935	25.4537	2.16559	0	17.3615	100001	100002	100003
18.35	0	11.2422	0	29.7396	19.4575	34.0545	25.5332	2.07828	0	17.416	100001	100002	100003
18.4	0	11.276	0	29.6796	19.5145	34.0169	25.6098	1.99417	0	17.4684	100001	100002	100003
18.45	0	11.3086	0	29.6219	19.5694	33.9807	25.6836	1.91318	0	17.5189	100001	100002	100003
18.5	0	11.34	0	29.5663	19.6222	33.9459	25.7546	1.83522	0	17.5676	100001	100002	100003
18.55	0	11.3702	0	29.5128	19.673	33.9124	25.8229	1.76019	0	17.6144	100001	100002	100003
18.6	0	11.3992	0	29.4614	19.722	33.8802	25.8886	1.68801	0	17.6594	100001	100002	100003
18.65	0	11.4272	0	29.4118	19.769	33.8493	25.9519	1.61857	0	17.7027	100001	100002	100003
18.7	0	11.454	0	29.3642	19.8143	33.8195	26.0127	1.5518	0	17.7443	100001	100002	100003
18.75	0	11.4799	0	29.3184	19.8578	33.7909	26.0711	1.48761	0	17.7844	100001	100002	100003
18.8	0	11.5047	0	29.2744	19.8996	33.7634	26.1273	1.42591	0	17.8229	100001	100002	100003
18.85	0	11.5286	0	29.2322	19.9398	33.737	26.1813	1.36661	0	17.8599	100001	100002	100003
18.9	0	11.5515	0	29.1915	19.9784	33.7117	26.2332	1.30965	0	17.8954	100001	100002	100003
18.95	0	11.5735	0	29.1525	20.0154	33.6874	26.283	1.25493	0	17.9295	100001	100002	100003
19	0	11.5946	0	29.115	20.0511	33.664	26.3309	1.20238	0	17.9623	100001	100002	100003
19.05	0	11.615	0	29.079	20.0852	33.6416	26.3768	1.15192	0	17.9938	100001	100002	100003
19.1	0	11.6344	0	29.0445	20.1181	33.62	26.4209	1.10348	0	18.024	100001	100002	100003
19.15	0	11.6532	0	29.0113	20.1496	33.5994	26.4633	1.05698	0	18.053	100001	100002	100003
19.2	0	11.6711	0	28.9795	20.1798	33.5796	26.5039	1.01236	0	18.0808	100001	100002	100003
19.25	0	11.6883	0	28.9489	20.2088	33.5606	26.5429	0.969547	0	18.1075	100001	100002	100003
19.3	0	11.7049	0	28.9196	20.2367	33.5423	26.5803	0.928471	0	18.1331	100001	100002	100003
19.35	0	11.7207	0	28.8915	20.2634	33.5249	26.6162	0.889071	0	18.1577	100001	100002	100003
19.4	0	11.7359	0	28.8645	20.289	33.5081	26.6506	0.851281	0	18.1813	100001	100002	100003
19.45	0	11.7505	0	28.8387	20.3135	33.492	26.6836	0.815043	0	18.2039	100001	100002	100003
19.5	0	11.7645	0	28.8139	20.3371	33.4766	26.7153	0.780297	0	18.2256	100001	100002	100003
19.55	0	11.7779	0	28.7901	20.3597	33.4618	26.7456	0.746985	0	18.2463	100001	100002	100003
19.6	0	11.7908	0	28.7673	20.3813	33.4477	26.7747	0.715052	0	18.2663	100001	100002	100003
19.65	0	11.8031	0	28.7455	20.402	33.4341	26.8025	0.684445	0	18.2854	100001	100002	100003
19.7	0	11.8149	0	28.7246	20.4219	33.4211	26.8293	0.655112	0	18.3037	100001	100002	100003
19.75	0	11.8262	0	28.7045	20.441	33.4087	26.8549	0.627003	0	18.3212	100001	100002	100003
19.8	0	11.837	0	28.6853	20.4592	33.3968	26.8794	0.60007	0	18.338	100001	100002	100003
19.85	0	11.8474	0	28.6669	20.4767	33.3853	26.9029	0.574266	0	18.3541	100001	100002	100003
19.9	0	11.8574	0	28.6492	20.4935	33.3744	26.9254	0.549546	0	18.3695	100001	100002	100003
19.95	0	11.8669	0	28.6323	20.5095	33.3639	26.947	0.525866	0	18.3843	100001	100002	100003
20	0	11.876	0	28.6161	20.5249	33.3539	26.9676	0.503185	0	18.3984	100001	100002	100003
20.05	0	11.8848	0	28.6006	20.5396	33.3443	26.9874	0.481463	0	18.412	100001	100002	100003
20.1	0	11.8931	0	28.5858	20.5537	33.3351	27.0063	0.460661	0	18.4249	100001	100002	100003
20.15	0	11.9011	0	28.5716	20.5672	33.3263	27.0245	0.440741	0	18.4374	100001	100002	100003
20.2	0	11.9088	0	28.558	20.5801	33.3178	27.0419	0.421667	0	18.4493	100001	100002	100003
20.25	0	11.9162	0	28.5449	20.5925	33.3097	27.0585	0.403405	0	18.4607	100001	100002	100003
20.3	0	11.9232	0	28.5324	20.6043	33.302	27.0744	0.38592	0	18.4716	100001	100002	100003
20.35	0	11.9299	0	28.5205	20.6157	33.2946	27.0896	0.369182	0	18.482	100001	100002	100003
20.4	0	11.9364	0	28.5091	20.6265	33.2875	27.1042	0.35316	0	18.492	100001	100002	100003
20.45	0	11.9426	0	28.4981	20.6369	33.2807	27.1182	0.337822	0	18.5016	100001	100002	100003
20.5	0	11.9485	0	28.4876	20.6469	33.2743	27.1316	0.323142	0	18.5107	100001	100002	100003
20.55	0	11.9541	0	28.4776	20.6564	33.268	27.1444	0.309092	0	18.5195	100001	100002	100003
20.6	0	11.9595	0	28.468	20.6655	33.2621	27.1566	0.295645	0	18.5279	100001	100002	100003
20.65	0	11.9647	0	28.4588	20.6742	33.2564	27.1683	0.282777	0	18.5359	100001	100002	100003
20.7	0	11.9697	0	28.45	20.6826	33.251	27.1795	0.270462	0	18.5436	100001	100002	100003
20.75	0	11.9744	0	28.4416	20.6906	33.2458	27.1903	0.258678	0	18.5509	100001	100002	100003
20.8	0	11.9789	0	28.4336	20.6982	33.2408	27.2005	0.247402	0	18.558	100001	100002	100003
20.85	0	11.9833	0	28.4259	20.7055	33.236	27.2104	0.236612	0	18.5647	100001	100002	100003
20.9	0	11.9874	0	28.4185	20.7125	33.2315	27.2198	0.226289	0	18.5711	100001	100002	100003
20.95	0	11.9914	0	28.4115	20.7192	33.2271	27.2288	0.216413	0	18.5773	100001	100002	100003
21	0	11.9952	0	28.4047	20.7256	33.2229	27.2374	0.206964	0	18.5832	100001	100002	100003
21.05	0	11.9989	0	28.3983	20.7317	33.2189	27.2456	0.197924	0	18.5888	100001	100002	100003
21.1	0	12.0023	0	28.3921	20.7376	33.2151	27.2535	0.189276	0	18.5942	100001	100002	100003
21.15	0	12.0057	0	28.3862	20.7432	33.2115	27.261	0.181002	0	18.5994	100001	100002	100003
21.2	0	12.0088	0	28.3805	20.7486	33.208	27.2682	0.173088	0	18.6043	100001	100002	100003
21.25	0	12.0119	0	28.3751	20.7537	33.2046	27.2751	0.165517	0	18.609	100001	100002	100003
21.3	0	12.0148	0	28.37	20.7586	33.2014	27.2817	0.158275	0	18.6136	100001	100002	100003
21.35	0	12.0176	0	28.365	20.7633	33.1984	27.288	0.151348	0	18.6179	100001	100002	100003
21.4	0	12.0203	0	28.3603	20.7678	33.1954	27.2941	0.144723	0	18.622	100001	100002	100003
21.45	0	12.0228	0	28.3558	20.7721	33.1926	27.2998	0.138385	0	18.626	100001	100002	100003
21.5	0	12.0253	0	28.3514	20.7762	33.19	27.3053	0.132324	0	18.6297	100001	100002	100003
21.55	0	12.0276	0	28.3473	20.7801	33.1874	27.3106	0.126527	0	18.6334	100001	100002	100003
21.6	0	12.0298	0	28.3433	20.7839	33.185	27.3157	0.120982	0	18.6368	100001	100002	100003
21.65	0	12.032	0	28.3396	20.7875	33.1826	27.3205	0.11568	0	18.6401	100001	100002	100003
21.7	0	12.034	0	28.3359	20.7909	33.1804	27.3251	0.110609	0	18.6433	100001	100002	100003
21.75	0	12.0359	0	28.3325	20.7942	33.1782	27.3295	0.105759	0	18.6463	100001	100002	100003
21.8	0	12.0378	0	28.3292	20.7973	33.1762	27.3338	0.101121	0	18.6492	100001	100002	100003
21.85	0	12.0396	0	28.326	20.8003	33.1742	27.3378	0.0966851	0	18.652	100001	100002	100003
21.9	0	12.0413	0	28.323	20.8032	33.1724	27.3417	0.0924434	0	18.6546	100001	100002	100003
21.95	0	12.0429	0	28.3201	20.806	33.1706	27.3454	0.0883871	0	18.6571	100001	100002	100003
22	0	12.0445	0	28.3173	20.8086	33.1689	27.3489	0.0845082	0	18.6596	100001	100002	100003
22.05	0	12.046	0	28.3147	20.8111	33.1672	27.3523	0.0807989	0	18.6619	100001	100002	100003
22.1	0	12.0474	0	28.3121	20.8135	33.1657	27.3555	0.0772519	0	18.6641	100001	100002	100003
22.15	0	12.0488	0	28.3097	20.8158	33.1642	27.3586	0.0738601	0	18.6662	100001	100002	100003
22.2	0	12.0501	0	28.3074	20.818	33.1627	27.3615	0.0706168	0	18.6682	100001	100002	100003
22.25	0	12.0513	0	28.3052	20.8201	33.1614	27.3644	0.0675155	0	18.6702	100001	100002	100003
22.3	0	12.0525	0	28.3031	20.8221	33.1601	27.3671	0.0645501	0	18.672	100001	100002	100003
22.35	0	12.0537	0	28.301	20.824	33.1588	27.3696	0.0617146	0	18.6738	100001	100002	100003
22.4	0	12.0548	0	28.2991	20.8259	33.1576	27.3721	0.0590033	0	18.6755	100001	100002	100003
22.45	0	12.0558	0	28.2972	20.8276	33.1565	27.3745	0.0564109	0	18.6771	100001	100002	100003
22.5	0	12.0568	0	28.2955	20.8293	33.1554	27.3767	0.0539321	0	18.6786	100001	100002	100003
22.55	0	12.0578	0	28.2938	20.8309	33.1543	27.3789	0.051562	0	18.6801	100001	100002	100003
22.6	0	12.0587	0	28.2922	20.8325	33.1533	27.381	0.0492959	0	18.6815	100001	100002	100003
22.65	0	12.0595	0	28.2906	20.8339	33.1524	27.3829	0.0471292	0	18.6829	100001	100002	100003
22.7	0	12.0604	0	28.2891	20.8353	33.1515	27.3848	0.0450575	0	18.6842	100001	100002	100003
22.75	0	12.0612	0	28.2877	20.8367	33.1506	27.3866	0.0430767	0	18.6854	100001	100002	100003
22.8	0	12.0619	0	28.2864	20.838	33.1497	27.3883	0.0411829	0	18.6866	100001	100002	100003
22.85	0	12.0627	0	28.2851	20.8392	33.149	27.39	0.0393722	0	18.6877	100001	100002	100003
22.9	0	12.0634	0	28.2838	20.8404	33.1482	27.3916	0.037641	0	18.6888	100001	100002	100003
22.95	0	12.064	0	28.2827	20.8415	33.1475	27.3931	0.0359858	0	18.6898	100001	100002	100003
23	0	12.0647	0	28.2815	20.8425	33.1468	27.3945	0.0344032	0	18.6908	100001	100002	100003
23.05	0	12.0653	0	28.2805	20.8436	33.1461	27.3959	0.0328902	0	18.6918	100001	100002	100003
23.1	0	12.0658	0	28.2794	20.8446	33.1455	27.3972	0.0314436	0	18.6927	100001	100002	100003
23.15	0	12.0664	0	28.2784	20.8455	33.1448	27.3985	0.0300606	0	18.6935	100001	100002	100003
23.2	0	12.0669	0	28.2775	20.8464	33.1443	27.3997	0.0287383	0	18.6943	100001	100002	100003
23.25	0	12.0674	0	28.2766	20.8472	33.1437	27.4008	0.0274741	0	18.6951	100001	100002	100003
23.3	0	12.0679	0	28.2757	20.8481	33.1432	27.4019	0.0262655	0	18.6959	100001	100002	100003
23.35	0	12.0684	0	28.2749	20.8488	33.1427	27.403	0.02511	0	18.6966	100001	100002	100003
23.4	0	12.0688	0	28.2741	20.8496	33.1422	27.404	0.0240053	0	18.6973	100001	100002	100003
23.45	0	12.0693	0	28.2734	20.8503	33.1417	27.4049	0.0229491	0	18.698	100001	100002	100003
23.5	0	12.0697	0	28.2726	20.851	33.1413	27.4059	0.0219393	0	18.6986	100001	100002	100003
23.55	0	12.0701	0	28.2719	20.8516	33.1408	27.4067	0.020974	0	18.6992	100001	100002	100003
23.6	0	12.0704	0	28.2713	20.8523	33.1404	27.4076	0.0200511	0	18.6998	100001	100002	100003
23.65	0	12.0708	0	28.2707	20.8529	33.14	27.4084	0.0191688	0	18.7003	100001	100002	100003
23.7	0	12.0711	0	28.2701	20.8534	33.1397	27.4092	0.0183252	0	18.7008	100001	100002	100003
23.75	0	12.0715	0	28.2695	20.854	33.1393	27.4099	0.0175188	0	18.7013	100001	100002	100003
23.8	0	12.0718	0	28.2689	20.8545	33.139	27.4106	0.0167478	0	18.7018	100001	100002	100003
23.85	0	12.0721	0	28.2684	20.855	33.1386	27.4113	0.0160107	0	18.7023	100001	100002	100003
23.9	0	12.0723	0	28.2679	20.8555	33.1383	27.4119	0.0153061	0	18.7027	100001	100002	100003
23.95	0	12.0726	0	28.2674	20.8559	33.138	27.4125	0.0146324	0	18.7031	100001	100002	100003
24	0	12.0729	0	28.267	20.8564	33.1378	27.4131	0.0139884	0	18.7035	100001	100002	100003
24.05	0	12.0731	0	28.2665	20.8568	33.1375	27.4137	0.0133727	0	18.7039	100001	100002	100003
24.1	0	12.0734	0	28.2661	20.8572	33.1372	27.4142	0.0127841	0	18.7043	100001	100002	100003
24.15	0	12.0736	0	28.2657	20.8576	33.137	27.4147	0.0122214	0	18.7047	100001	100002	100003
24.2	0	12.0738	0	28.2653	20.8579	33.1367	27.4152	0.0116834	0	18.705	100001	100002	100003
24.25	0	12.074	0	28.2649	20.8583	33.1365	27.4157	0.0111691	0	18.7053	100001	100002	100003
24.3	0	12.0742	0	28.2646	20.8586	33.1363	27.4161	0.0106775	0	18.7056	100001	100002	100003
24.35	0	12.0744	0	28.2643	20.8589	33.1361	27.4166	0.0102074	0	18.7059	100001	100002	100003
24.4	0	12.0746	0	28.2639	20.8592	33.1359	27.417	0.00975809	0	18.7062	100001	100002	100003
24.45	0	12.0747	0	28.2636	20.8595	33.1357	27.4174	0.00932852	0	18.7065	100001	100002	100003
24.5	0	12.0749	0	28.2633	20.8598	33.1355	27.4177	0.00891786	0	18.7067	100001	100002	100003
24.55	0	12.0751	0	28.2631	20.8601	33.1353	27.4181	0.00852526	0	18.707	100001	100002	100003
24.6	0	12.0752	0	28.2628	20.8603	33.1352	27.4184	0.00814994	0	18.7072	100001	100002	100003
24.65	0	12.0754	0	28.2625	20.8606	33.135	27.4188	0.00779114	0	18.7074	100001	100002	100003
24.7	0	12.0755	0	28.2623	20.8608	33.1349	27.4191	0.00744813	0	18.7076	100001	100002	100003
24.75	0	12.0756	0	28.2621	20.861	33.1347	27.4194	0.00712022	0	18.7078	100001	100002	100003
24.8	0	12.0758	0	28.2618	20.8612	33.1346	27.4196	0.00680674	0	18.708	100001	100002	100003
24.85	0	12.0759	0	28.2616	20.8615	33.1345	27.4199	0.00650706	0	18.7082	100001	100002	100003
24.9	0	12.076	0	28.2614	20.8616	33.1343	27.4202	0.00622057	0	18.7084	100001	100002	100003
24.95	0	12.0761	0	28.2612	20.8618	33.1342	27.4204	0.00594669	0	18.7086	100001	100002	100003
25	0	12.0762	0	28.261	20.862	33.1341	27.4207	0.00568487	0	18.7087	100001	100002	100003
25.05	0	12.0763	0	28.2609	20.8622	33.134	27.4209	0.00543456	0	18.7089	100001	100002	100003
25.1	0	12.0764	0	28.2607	20.8623	33.1339	27.4211	0.00519528	0	18.709	100001	100002	100003
25.15	0	12.0765	0	28.2605	20.8625	33.1338	27.4213	0.00496654	0	18.7092	100001	100002	100003
25.2	0	12.0766	0	28.2604	20.8626	33.1337	27.4215	0.00474786	0	18.7093	100001	100002	100003
25.25	0	12.0767	0	28.2602	20.8628	33.1336	27.4217	0.0045388	0	18.7094	100001	100002	100003
25.3	0	12.0768	0	28.2601	20.8629	33.1335	27.4219	0.00433896	0	18.7096	100001	100002	100003
25.35	0	12.0768	0	28.2599	20.8631	33.1334	27.4221	0.00414791	0	18.7097	100001	100002	100003
25.4	0	12.0769	0	28.2598	20.8632	33.1333	27.4222	0.00396527	0	18.7098	100001	100002	100003
25.45	0	12.077	0	28.2597	20.8633	33.1333	27.4224	0.00379067	0	18.7099	100001	100002	100003
25.5	0	12.077	0	28.2596	20.8634	33.1332	27.4225	0.00362376	0	18.71	100001	100002	100003
25.55	0	12.0771	0	28.2594	20.8635	33.1331	27.4227	0.00346419	0	18.7101	100001	100002	100003
25.6	0	12.0772	0	28.2593	20.8636	33.133	27.4228	0.00331165	0	18.7102	100001	100002	100003
25.65	0	12.0772	0	28.2592	20.8637	33.133	27.423	0.00316583	0	18.7103	100001	100002	100003
25.7	0	12.0773	0	28.2591	20.8638	33.1329	27.4231	0.00302643	0	18.7104	100001	100002	100003
25.75	0	12.0773	0	28.259	20.8639	33.1329	27.4232	0.00289316	0	18.7105	100001	100002	100003
25.8	0	12.0774	0	28.2589	20.864	33.1328	27.4233	0.00276576	0	18.7105	100001	100002	100003
25.85	0	12.0774	0	28.2589	20.8641	33.1328	27.4234	0.00264398	0	18.7106	100001	100002	100003
25.9	0	12.0775	0	28.2588	20.8641	33.1327	27.4235	0.00252755	0	18.7107	100001	100002	100003
25.95	0	12.0775	0	28.2587	20.8642	33.1326	27.4236	0.00241625	0	18.7108	100001	100002	100003
26	0	12.0776	0	28.2586	20.8643	33.1326	27.4237	0.00230985	0	18.7108	100001	100002	100003
26.05	0	12.0776	0	28.2585	20.8644	33.1326	27.4238	0.00220814	0	18.7109	100001	100002	100003
26.1	0	12.0777	0	28.2585	20.8644	33.1325	27.4239	0.0021109	0	18.711	100001	100002	100003
26.15	0	12.0777	0	28.2584	20.8645	33.1325	27.424	0.00201795	0	18.711	100001	100002	100003
26.2	0	12.0777	0	28.2583	20.8646	33.1324	27.4241	0.00192909	0	18.7111	100001	100002	100003
26.25	0	12.0778	0	28.2583	20.8646	33.1324	27.4242	0.00184414	0	18.7111	100001	100002	100003
26.3	0	12.0778	0	28.2582	20.8647	33.1324	27.4242	0.00176293	0	18.7112	100001	100002	100003
26.35	0	12.0778	0	28.2582	20.8647	33.1323	27.4243	0.0016853	0	18.7112	100001	100002	100003
26.4	0	12.0779	0	28.2581	20.8648	33.1323	27.4244	0.00161108	0	18.7113	100001	100002	100003
26.45	0	12.0779	0	28.2581	20.8648	33.1323	27.4244	0.00154014	0	18.7113	100001	100002	100003
26.5	0	12.0779	0	28.258	20.8649	33.1322	27.4245	0.00147232	0	18.7114	100001	100002	100003
26.55	0	12.0779	0	28.258	20.8649	33.1322	27.4246	0.00140748	0	18.7114	100001	100002	100003
26.6	0	12.078	0	28.2579	20.865	33.1322	27.4246	0.0013455	0	18.7114	100001	100002	100003
26.65	0	12.078	0	28.2579	20.865	33.1322	27.4247	0.00128625	0	18.7115	100001	100002	100003
26.7	0	12.078	0	28.2578	20.865	33.1321	27.4247	0.00122961	0	18.7115	100001	100002	100003
26.75	0	12.078	0	28.2578	20.8651	33.1321	27.4248	0.00117546	0	18.7115	100001	100002	100003
26.8	0	12.078	0	28.2578	20.8651	33.1321	27.4248	0.0011237	0	18.7116	100001	100002	100003
26.85	0	12.0781	0	28.2577	20.8651	33.1321	27.4249	0.00107421	0	18.7116	100001	100002	100003
26.9	0	12.0781	0	28.2577	20.8652	33.132	27.4249	0.00102691	0	18.7116	100001	100002	100003
26.95	0	12.0781	0	28.2577	20.8652	33.132	27.425	0.000981684	0	18.7117	100001	100002	100003
27	0	12.0781	0	28.2576	20.8652	33.132	27.425	0.000938454	0	18.7117	100001	100002	100003
27.05	0	12.0781	0	28.2576	20.8653	33.132	27.425	0.000897126	0	18.7117	100001	100002	100003
27.1	0	12.0782	0	28.2576	20.8653	33.132	27.4251	0.000857619	0	18.7117	100001	100002	100003
27.15	0	12.0782	0	28.2576	20.8653	33.1319	27.4251	0.000819852	0	18.7118	100001	100002	100003
27.2	0	12.0782	0	28.2575	20.8653	33.1319	27.4251	0.000783748	0	18.7118	100001	100002	100003
27.25	0	12.0782	0	28.2575	20.8654	33.1319	27.4252	0.000749233	0	18.7118	100001	100002	100003
27.3	0	12.0782	0	28.2575	20.8654	33.1319	27.4252	0.000716239	0	18.7118	100001	100002	100003
27.35	0	12.0782	0	28.2575	20.8654	33.1319	27.4252	0.000684697	0	18.7118	100001	100002	100003
27.4	0	12.0782	0	28.2574	20.8654	33.1319	27.4253	0.000654545	0	18.7119	100001	100002	100003
27.45	0	12.0782	0	28.2574	20.8654	33.1319	27.4253	0.00062572	0	18.7119	100001	100002	100003
27.5	0	12.0783	0	28.2574	20.8655	33.1318	27.4253	0.000598165	0	18.7119	100001	100002	100003
27.55	0	12.0783	0	28.2574	20.8655	33.1318	27.4253	0.000571823	0	18.7119	100001	100002	100003
27.6	0	12.0783	0	28.2574	20.8655	33.1318	27.4253	0.000546641	0	18.7119	100001	100002	100003
27.65	0	12.0783	0	28.2573	20.8655	33.1318	27.4254	0.000522568	0	18.7119	100001	100002	100003
27.7	0	12.0783	0	28.2573	20.8655	33.1318	27.4254	0.000499555	0	18.712	100001	100002	100003
27.75	0	12.0783	0	28.2573	20.8655	33.1318	27.4254	0.000477555	0	18.712	100001	100002	100003
27.8	0	12.0783	0	28.2573	20.8656	33.1318	27.4254	0.000456525	0	18.712	100001	100002	100003
27.85	0	12.0783	0	28.2573	20.8656	33.1318	27.4255	0.00043642	0	18.712	100001	100002	100003
27.9	0	12.0783	0	28.2573	20.8656	33.1318	27.4255	0.000417201	0	18.712	100001	100002	100003
27.95	0	12.0783	0	28.2573	20.8656	33.1318	27.4255	0.000398828	0	18.712	100001	100002	100003
28	0	12.0783	0	28.2572	20.8656	33.1318	27.4255	0.000381265	0	18.712	100001	100002	100003
28.05	0	12.0784	0	28.2572	20.8656	33.1317	27.4255	0.000364475	0	18.712	100001	100002	100003
28.1	0	12.0784	0	28.2572	20.8656	33.1317	27.4255	0.000348424	0	18.7121	100001	100002	100003
28.15	0	12.0784	0	28.2572	20.8656	33.1317	27.4255	0.00033308	0	18.7121	100001	100002	100003
28.2	0	12.0784	0	28.2572	20.8656	33.1317	27.4256	0.000318411	0	18.7121	100001	100002	100003
28.25	0	12.0784	0	28.2572	20.8657	33.1317	27.4256	0.000304389	0	18.7121	100001	100002	100003
28.3	0	12.0784	0	28.2572	20.8657	33.1317	27.4256	0.000290984	0	18.7121	100001	100002	100003
28.35	0	12.0784	0	28.2572	20.8657	33.1317	27.4256	0.00027817	0	18.7121	100001	100002	100003
28.4	0	12.0784	0	28.2572	20.8657	33.1317	27.4256	0.00026592	0	18.7121	100001	100002	100003
28.45	0	12.0784	0	28.2572	20.8657	33.1317	27.4256	0.000254209	0	18.7121	100001	100002	100003
28.5	0	12.0784	0	28.2571	20.8657	33.1317	27.4256	0.000243014	0	18.7121	100001	100002	100003
28.55	0	12.0784	0	28.2571	20.8657	33.1317	27.4256	0.000232312	0	18.7121	100001	100002	100003
28.6	0	12.0784	0	28.2571	20.8657	33.1317	27.4256	0.000222081	0	18.7121	100001	100002	100003
28.65	0	12.0784	0	28.2571	20.8657	33.1317	27.4257	0.000212301	0	18.7121	100001	100002	100003
28.7	0	12.0784	0	28.2571	20.8657	33.1317	27.4257	0.000202952	0	18.7121	100001	100002	100003
28.75	0	12.0784	0	28.2571	20.8657	33.1317	27.4257	0.000194014	0	18.7122	100001	100002	100003
28.8	0	12.0784	0	28.2571	20.8657	33.1317	27.4257	0.00018547	0	18.7122	100001	100002	100003
28.85	0	12.0784	0	28.2571	20.8657	33.1317	27.4257	0.000177302	0	18.7122	100001	100002	100003
28.9	0	12.0784	0	28.2571	20.8657	33.1317	27.4257	0.000169494	0	18.7122	100001	100002	100003
28.95	0	12.0784	0	28.2571	20.8658	33.1317	27.4257	0.00016203	0	18.7122	100001	100002	100003
29	0	12.0784	0	28.2571	20.8658	33.1317	27.4257	0.000154894	0	18.7122	100001	100002	100003
29.05	0	12.0784	0	28.2571	20.8658	33.1316	27.4257	0.000148073	0	18.7122	100001	100002	100003
29.1	0	12.0784	0	28.2571	20.8658	33.1316	27.4257	0.000141552	0	18.7122	100001	100002	100003
29.15	0	12.0784	0	28.2571	20.8658	33.1316	27.4257	0.000135318	0	18.7122	100001	100002	100003
29.2	0	12.0784	0	28.2571	20.8658	33.1316	27.4257	0.000129359	0	18.7122	100001	100002	100003
29.25	0	12.0785	0	28.2571	20.8658	33.1316	27.4257	0.000123662	0	18.7122	100001	100002	100003
29.3	0	12.0785	0	28.2571	20.8658	33.1316	27.4257	0.000118216	0	18.7122	100001	100002	100003
29.35	0	12.0785	0	28.2571	20.8658	33.1316	27.4257	0.00011301	0	18.7122	100001	100002	100003
29.4	0	12.0785	0	28.257	20.8658	33.1316	27.4257	0.000108033	0	18.7122	100001	100002	100003
29.45	0	12.0785	0	28.257	20.8658	33.1316	27.4258	0.000103275	0	18.7122	100001	100002	100003
29.5	0	12.0785	0	28.257	20.8658	33.1316	27.4258	9.87274e-05	0	18.7122	100001	100002	100003
29.55	0	12.0785	0	28.257	20.8658	33.1316	27.4258	9.43795e-05	0	18.7122	100001	100002	100003
29.6	0	12.0785	0	28.257	20.8658	33.1316	27.4258	9.02232e-05	0	18.7122	100001	100002	100003
29.65	0	12.0785	0	28.257	20.8658	33.1316	27.4258	8.62499e-05	0	18.7122	100001	100002	100003
29.7	0	12.0785	0	28.257	20.8658	33.1316	27.4258	8.24515e-05	0	18.7122	100001	100002	100003
29.75	0	12.0785	0	28.257	20.8658	33.1316	27.4258	7.88204e-05	0	18.7122	100001	100002	100003
29.8	0	12.0785	0	28.257	20.8658	33.1316	27.4258	7.53493e-05	0	18.7122	100001	100002	100003
29.85	0	12.0785	0	28.257	20.8658	33.1316	27.4258	7.2031e-05	0	18.7122	100001	100002	100003
29.9	0	12.0785	0	28.257	20.8658	33.1316	27.4258	6.88588e-05	0	18.7122	100001	100002	100003
29.95	0	12.0785	0	28.257	20.8658	33.1316	27.4258	6.58264e-05	0	18.7122	100001	100002	100003
30	0	12.0785	0	28.257	20.8658	33.1316	27.4258	6.29275e-05	0	18.7122	100001	100002	100003
30.05	0	12.0785	0	28.257	20.8658	33.1316	27.4258	6.01562e-05	0	18.7122	100001	100002	100003
30.1	0	12.0785	0	28.257	20.8658	33.1316	27.4258	5.7507e-05	0	18.7122	100001	100002	100003
30.15	0	12.0785	0	28.257	20.8658	33.1316	27.4258	5.49744e-05	0	18.7122	100001	100002	100003
30.2	0	12.0785	0	28.257	20.8658	33.1316	27.4258	5.25534e-05	0	18.7122	100001	100002	100003
30.25	0	12.0785	0	28.257	20.8658	33.1316	27.4258	5.0239e-05	0	18.7122	100001	100002	100003
30.3	0	12.0785	0	28.257	20.8658	33.1316	27.4258	4.80266e-05	0	18.7122	100001	100002	100003
30.35	0	12.0785	0	28.257	20.8658	33.1316	27.4258	4.59115e-05	0	18.7122	100001	100002	100003
30.4	0	12.0785	0	28.257	20.8658	33.1316	27.4258	4.38896e-05	0	18.7122	100001	100002	100003
30.45	0	12.0785	0	28.257	20.8658	33.1316	27.4258	4.19568e-05	0	18.7122	100001	100002	100003
30.5	0	12.0785	0	28.257	20.8658	33.1316	27.4258	4.01091e-05	0	18.7122	100001	100002	100003
30.55	0	12.0785	0	28.257	20.8658	33.1316	27.4258	3.83427e-05	0	18.7122	100001	100002	100003
30.6	0	12.0785	0	28.257	20.8658	33.1316	27.4258	3.66541e-05	0	18.7123	100001	100002	100003
30.65	0	12.0785	0	28.257	20.8658	33.1316	27.4258	3.50399e-05	0	18.7123	100001	100002	100003
30.7	0	12.0785	0	28.257	20.8658	33.1316	27.4258	3.34968e-05	0	18.7123	100001	100002	100003
30.75	0	12.0785	0	28.257	20.8658	33.1316	27.4258	3.20216e-05	0	18.7123	100001	100002	100003
30.8	0	12.0785	0	28.257	20.8658	33.1316	27.4258	3.06114e-05	0	18.7123	100001	100002	100003
30.85	0	12.0785	0	28.257	20.8658	33.1316	27.4258	2.92633e-05	0	18.7123	100001	100002	100003
30.9	0	12.0785	0	28.257	20.8658	33.1316	27.4258	2.79746e-05	0	18.7123	100001	100002	100003
30.95	0	12.0785	0	28.257	20.8658	33.1316	27.4258	2.67427e-05	0	18.7123	100001	100002	100003
31	0	12.0785	0	28.257	20.8658	33.1316	27.4258	2.55649e-05	0	18.7123	100001	100002	100003
31.05	0	12.0785	0	28.257	20.8658	33.1316	27.4258	2.44391e-05	0	18.7123	100001	100002	100003
31.1	0	12.0785	0	28.257	20.8658	33.1316	27.4258	2.33628e-05	0	18.7123	100001	100002	100003
31.15	0	12.0785	0	28.257	20.8658	33.1316	27.4258	2.23339e-05	0	18.7123	100001	100002	100003
31.2	0	12.0785	0	28.257	20.8658	33.1316	27.4258	2.13504e-05	0	18.7123	100001	100002	100003
31.25	0	12.0785	0	28.257	20.8658	33.1316	27.4258	2.04101e-05	0	18.7123	100001	100002	100003
31.3	0	12.0785	0	28.257	20.8658	33.1316	27.4258	1.95113e-05	0	18.7123	100001	100002	100003
31.35	0	12.0785	0	28.257	20.8658	33.1316	27.4258	1.8652e-05	0	18.7123	100001	100002	100003
31.4	0	12.0785	0	28.257	20.8659	33.1316	27.4258	1.78306e-05	0	18.7123	100001	100002	100003
31.45	0	12.0785	0	28.257	20.8659	33.1316	27.4258	1.70454e-05	0	18.7123	100001	100002	100003
31.5	0	12.0785	0	28.257	20.8659	33.1316	27.4258	1.62947e-05	0	18.7123	100001	100002	100003
31.55	0	12.0785	0	28.257	20.8659	33.1316	27.4258	1.55771e-05	0	18.7123	100001	100002	100003
31.6	0	12.0785	0	28.257	20.8659	33.1316	27.4258	1.48911e-05	0	18.7123	100001	100002	100003
31.65	0	12.0785	0	28.257	20.8659	33.1316	27.4258	1.42353e-05	0	18.7123	100001	100002	100003
31.7	0	12.0785	0	28.257	20.8659	33.1316	27.4258	1.36084e-05	0	18.7123	100001	100002	100003
31.75	0	12.0785	0	28.257	20.8659	33.1316	27.4258	1.30091e-05	0	18.7123	100001	100002	100003
31.8	0	12.0785	0	28.257	20.8659	33.1316	27.4258	1.24362e-05	0	18.7123	100001	100002	100003
31.85	0	12.0785	0	28.257	20.8659	33.1316	27.4258	1.18885e-05	0	18.7123	100001	100002	100003
31.9	0	12.0785	0	28.257	20.8659	33.1316	27.4258	1.1365e-05	0	18.7123	100001	100002	100003
31.95	0	12.0785	0	28.257	20.8659	33.1316	27.4258	1.08645e-05	0	18.7123	100001	100002	100003
32	0	12.0785	0	28.257	20.8659	33.1316	27.4258	1.0386e-05	0	18.7123	100001	100002	100003
32.05	0	12.0785	0	28.257	20.8659	33.1316	27.4258	9.92862e-06	0	18.7123	100001	100002	100003
32.1	0	12.0785	0	28.257	20.8659	33.1316	27.4258	9.49138e-06	0	18.7123	100001	100002	100003
32.15	0	12.0785	0	28.257	20.8659	33.1316	27.4258	9.07339e-06	0	18.7123	100001	100002	100003
32.2	0	12.0785	0	28.257	20.8659	33.1316	27.4258	8.67381e-06	0	18.7123	100001	100002	100003
32.25	0	12.0785	0	28.257	20.8659	33.1316	27.4258	8.29182e-06	0	18.7123	100001	100002	100003
32.3	0	12.0785	0	28.257	20.8659	33.1316	27.4258	7.92666e-06	0	18.7123	100001	100002	100003
32.35	0	12.0785	0	28.257	20.8659	33.1316	27.4258	7.57758e-06	0	18.7123	100001	100002	100003
32.4	0	12.0785	0	28.257	20.8659	33.1316	27.4258	7.24387e-06	0	18.7123	100001	100002	100003
32.45	0	12.0785	0	28.257	20.8659	33.1316	27.4258	6.92485e-06	0	18.7123	100001	100002	100003
32.5	0	12.0785	0	28.257	20.8659	33.1316	27.4258	6.61989e-06	0	18.7123	100001	100002	100003
32.55	0	12.0785	0	28.257	20.8659	33.1316	27.4258	6.32836e-06	0	18.7123	100001	100002	100003
32.6	0	12.0785	0	28.257	20.8659	33.1316	27.4258	6.04966e-06	0	18.7123	100001	100002	100003
32.65	0	12.0785	0	28.257	20.8659	33.1316	27.4258	5.78324e-06	0	18.7123	100001	100002	100003
32.7	0	12.0785	0	28.257	20.8659	33.1316	27.4258	5.52856e-06	0	18.7123	100001	100002	100003
32.75	0	12.0785	0	28.257	20.8659	33.1316	27.4258	5.28508e-06	0	18.7123	100001	100002	100003
32.8	0	12.0785	0	28.257	20.8659	33.1316	27.4258	5.05233e-06	0	18.7123	100001	100002	100003
32.85	0	12.0785	0	28.257	20.8659	33.1316	27.4258	4.82984e-06	0	18.7123	100001	100002	100003
32.9	0	12.0785	0	28.257	20.8659	33.1316	27.4258	4.61714e-06	0	18.7123	100001	100002	100003
32.95	0	12.0785	0	28.257	20.8659	33.1316	27.4258	4.4138e-06	0	18.7123	100001	100002	100003
33	0	12.0785	0	28.257	20.8659	33.1316	27.4258	4.21942e-06	0	18.7123	100001	100002	100003
33.05	0	12.0785	0	28.257	20.8659	33.1316	27.4258	4.0336e-06	0	18.7123	100001	100002	100003
33.1	0	12.0785	0	28.257	20.8659	33.1316	27.4258	3.85597e-06	0	18.7123	100001	100002	100003
33.15	0	12.0785	0	28.257	20.8659	33.1316	27.4258	3.68615e-06	0	18.7123	100001	100002	100003
33.2	0	12.0785	0	28.257	20.8659	33.1316	27.4258	3.52382e-06	0	18.7123	100001	100002	100003
33.25	0	12.0785	0	28.257	20.8659	33.1316	27.4258	3.36864e-06	0	18.7123	100001	100002	100003
33.3	0	12.0785	0	28.257	20.8659	33.1316	27.4258	3.22028e-06	0	18.7123	100001	100002	100003
33.35	0	12.0785	0	28.257	20.8659	33.1316	27.4258	3.07846e-06	0	18.7123	100001	100002	100003
33.4	0	12.0785	0	28.257	20.8659	33.1316	27.4258	2.94289e-06	0	18.7123	100001	100002	100003
33.45	0	12.0785	0	28.257	20.8659	33.1316	27.4258	2.81329e-06	0	18.7123	100001	100002	100003
33.5	0	12.0785	0	28.257	20.8659	33.1316	27.4258	2.6894e-06	0	18.7123	100001	100002	100003
33.55	0	12.0785	0	28.257	20.8659	33.1316	27.4258	2.57096e-06	0	18.7123	100001	100002	100003
33.6	0	12.0785	0	28.257	20.8659	33.1316	27.4258	2.45774e-06	0	18.7123	100001	100002	100003
33.65	0	12.0785	0	28.257	20.8659	33.1316	27.4258	2.3495e-06	0	18.7123	100001	100002	100003
33.7	0	12.0785	0	28.257	20.8659	33.1316	27.4258	2.24603e-06	0	18.7123	100001	100002	100003
33.75	0	12.0785	0	28.257	20.8659	33.1316	27.4258	2.14712e-06	0	18.7123	100001	100002	100003
33.8	0	12.0785	0	28.257	20.8659	33.1316	27.4258	2.05256e-06	0	18.7123	100001	100002	100003
33.85	0	12.0785	0	28.257	20.8659	33.1316	27.4258	1.96217e-06	0	18.7123	100001	100002	100003
33.9	0	12.0785	0	28.257	20.8659	33.1316	27.4258	1.87576e-06	0	18.7123	100001	100002	100003
33.95	0	12.0785	0	28.257	20.8659	33.1316	27.4258	1.79315e-06	0	18.7123	100001	100002	100003
34	0	12.0785	0	28.257	20.8659	33.1316	27.4258	1.71418e-06	0	18.7123	100001	100002	100003
34.05	0	12.0785	0	28.257	20.8659	33.1316	27.4258	1.63869e-06	0	18.7123	100001	100002	100003
34.1	0	12.0785	0	28.257	20.8659	33.1316	27.4258	1.56652e-06	0	18.7123	100001	100002	100003
34.15	0	12.0785	0	28.257	20.8659	33.1316	27.4258	1.49754e-06	0	18.7123	100001	100002	100003
34.2	0	12.0785	0	28.257	20.8659	33.1316	27.4258	1.43159e-06	0	18.7123	100001	100002	100003
34.25	0	12.0785	0	28.257	20.8659	33.1316	27.4258	1.36854e-06	0	18.7123	100001	100002	100003
34.3	0	12.0785	0	28.257	20.8659	33.1316	27.4258	1.30827e-06	0	18.7123	100001	100002	100003
34.35	0	12.0785	0	28.257	20.8659	33.1316	27.4258	1.25066e-06	0	18.7123	100001	100002	100003
34.4	0	12.0785	0	28.257	20.8659	33.1316	27.4258	1.19558e-06	0	18.7123	100001	100002	100003
34.45	0	12.0785	0	28.257	20.8659	33.1316	27.4258	1.14293e-06	0	18.7123	100001	100002	100003
34.5	0	12.0785	0	28.257	20.8659	33.1316	27.4258	1.09259e-06	0	18.7123	100001	100002	100003
34.55	0	12.0785	0	28.257	20.8659	33.1316	27.4258	1.04448e-06	0	18.7123	100001	100002	100003
34.6	0	12.0785	0	28.257	20.8659	33.1316	27.4258	9.98479e-07	0	18.7123	100001	100002	100003
34.65	0	12.0785	0	28.257	20.8659	33.1316	27.4258	9.54508e-07	0	18.7123	100001	100002	100003
34.7	0	12.0785	0	28.257	20.8659	33.1316	27.4258	9.12472e-07	0	18.7123	100001	100002	100003
34.75	0	12.0785	0	28.257	20.8659	33.1316	27.4258	8.72287e-07	0	18.7123	100001	100002	100003
34.8	0	12.0785	0	28.257	20.8659	33.1316	27.4258	8.33873e-07	0	18.7123	100001	100002	100003
34.85	0	12.0785	0	28.257	20.8659	33.1316	27.4258	7.9715e-07	0	18.7123	100001	100002	100003
34.9	0	12.0785	0	28.257	20.8659	33.1316	27.4258	7.62045e-07	0	18.7123	100001	100002	100003
34.95	0	12.0785	0	28.257	20.8659	33.1316	27.4258	7.28485e-07	0	18.7123	100001	100002	100003
35	0	12.0785	0	28.257	20.8659	33.1316	27.4258	6.96403e-07	0	18.7123	100001	100002	100003
35.05	0	12.0785	0	28.257	20.8659	33.1316	27.4258	6.65734e-07	0	18.7123	100001	100002	100003
35.1	0	12.0785	0	28.257	20.8659	33.1316	27.4258	6.36416e-07	0	18.7123	100001	100002	100003
35.15	0	12.0785	0	28.257	20.8659	33.1316	27.4258	6.08389e-07	0	18.7123	100001	100002	100003
35.2	0	12.0785	0	28.257	20.8659	33.1316	27.4258	5.81596e-07	0	18.7123	100001	100002	100003
35.25	0	12.0785	0	28.257	20.8659	33.1316	27.4258	5.55983e-07	0	18.7123	100001	100002	100003
35.3	0	12.0785	0	28.257	20.8659	33.1316	27.4258	5.31498e-07	0	18.7123	100001	100002	100003
35.35	0	12.0785	0	28.257	20.8659	33.1316	27.4258	5.08092e-07	0	18.7123	100001	100002	100003
35.4	0	12.0785	0	28.257	20.8659	33.1316	27.4258	4.85716e-07	0	18.7123	100001	100002	100003
35.45	0	12.0785	0	28.257	20.8659	33.1316	27.4258	4.64325e-07	0	18.7123	100001	100002	100003
35.5	0	12.0785	0	28.257	20.8659	33.1316	27.4258	4.43877e-07	0	18.7123	100001	100002	100003
35.55	0	12.0785	0	28.257	20.8659	33.1316	27.4258	4.24329e-07	0	18.7123	100001	100002	100003
35.6	0	12.0785	0	28.257	20.8659	33.1316	27.4258	4.05642e-07	0	18.7123	100001	100002	100003
35.65	0	12.0785	0	28.257	20.8659	33.1316	27.4258	3.87778e-07	0	18.7123	100001	100002	100003
35.7	0	12.0785	0	28.257	20.8659	33.1316	27.4258	3.70701e-07	0	18.7123	100001	100002	100003
35.75	0	12.0785	0	28.257	20.8659	33.1316	27.4258	3.54376e-07	0	18.7123	100001	100002	100003
35.8	0	12.0785	0	28.257	20.8659	33.1316	27.4258	3.38769e-07	0	18.7123	100001	100002	100003
35.85	0	12.0785	0	28.257	20.8659	33.1316	27.4258	3.2385e-07	0	18.7123	100001	100002	100003
35.9	0	12.0785	0	28.257	20.8659	33.1316	27.4258	3.09588e-07	0	18.7123	100001	100002	100003
35.95	0	12.0785	0	28.257	20.8659	33.1316	27.4258	2.95954e-07	0	18.7123	100001	100002	100003
36	0	12.0785	0	28.257	20.8659	33.1316	27.4258	2.82921e-07	0	18.7123	100001	100002	100003
36.05	0	12.0785	0	28.257	20.8659	33.1316	27.4258	2.70461e-07	0	18.7123	100001	100002	100003
36.1	0	12.0785	0	28.257	20.8659	33.1316	27.4258	2.5855e-07	0	18.7123	100001	100002	100003
36.15	0	12.0785	0	28.257	20.8659	33.1316	27.4258	2.47164e-07	0	18.7123	100001	100002	100003
36.2	0	12.0785	0	28.257	20.8659	33.1316	27.4258	2.36279e-07	0	18.7123	100001	100002	100003
36.25	0	12.0785	0	28.257	20.8659	33.1316	27.4258	2.25874e-07	0	18.7123	100001	100002	100003
36.3	0	12.0785	0	28.257	20.8659	33.1316	27.4258	2.15927e-07	0	18.7123	100001	100002	100003
36.35	0	12.0785	0	28.257	20.8659	33.1316	27.4258	2.06417e-07	0	18.7123	100001	100002	100003
36.4	0	12.0785	0	28.257	20.8659	33.1316	27.4258	1.97327e-07	0	18.7123	100001	100002	100003
36.45	0	12.0785	0	28.257	20.8659	33.1316	27.4258	1.88637e-07	0	18.7123	100001	100002	100003
36.5	0	12.0785	0	28.257	20.8659	33.1316	27.4258	1.8033e-07	0	18.7123	100001	100002	100003
36.55	0	12.0785	0	28.257	20.8659	33.1316	27.4258	1.72388e-07	0	18.7123	100001	100002	100003
36.6	0	12.0785	0	28.257	20.8659	33.1316	27.4258	1.64797e-07	0	18.7123	100001	100002	100003
36.65	0	12.0785	0	28.257	20.8659	33.1316	27.4258	1.57539e-07	0	18.7123	100001	100002	100003
36.7	0	12.0785	0	28.257	20.8659	33.1316	27.4258	1.50602e-07	0	18.7123	100001	100002	100003
36.75	0	12.0785	0	28.257	20.8659	33.1316	27.4258	1.4397e-07	0	18.7123	100001	100002	100003
36.8	0	12.0785	0	28.257	20.8659	33.1316	27.4258	1.3763e-07	0	18.7123	100001	100002	100003
36.85	0	12.0785	0	28.257	20.8659	33.1316	27.4258	1.31569e-07	0	18.7123	100001	100002	100003
36.9	0	12.0785	0	28.257	20.8659	33.1316	27.4258	1.25775e-07	0	18.7123	100001	100002	100003
36.95	0	12.0785	0	28.257	20.8659	33.1316	27.4258	1.20236e-07	0	18.7123	100001	100002	100003
37	0	12.0785	0	28.257	20.8659	33.1316	27.4258	1.14941e-07	0	18.7123	100001	100002	100003
37.05	0	12.0785	0	28.257	20.8659	33.1316	27.4258	1.09879e-07	0	18.7123	100001	100002	100003
37.1	0	12.0785	0	28.257	20.8659	33.1316	27.4258	1.05041e-07	0	18.7123	100001	100002	100003
37.15	0	12.0785	0	28.257	20.8659	33.1316	27.4258	1.00415e-07	0	18.7123	100001	100002	100003
37.2	0	12.0785	0	28.257	20.8659	33.1316	27.4258	9.59928e-08	0	18.7123	100001	100002	100003
37.25	0	12.0785	0	28.257	20.8659	33.1316	27.4258	9.17655e-08	0	18.7123	100001	100002	100003
37.3	0	12.0785	0	28.257	20.8659	33.1316	27.4258	8.77244e-08	0	18.7123	100001	100002	100003
37.35	0	12.0785	0	28.257	20.8659	33.1316	27.4258	8.38612e-08	0	18.7123	100001	100002	100003
37.4	0	12.0785	0	28.257	20.8659	33.1316	27.4258	8.01681e-08	0	18.7123	100001	100002	100003
37.45	0	12.0785	0	28.257	20.8659	33.1316	27.4258	7.66377e-08	0	18.7123	100001	100002	100003
37.5	0	12.0785	0	28.257	20.8659	33.1316	27.4258	7.32627e-08	0	18.7123	100001	100002	100003
37.55	0	12.0785	0	28.257	20.8659	33.1316	27.4258	7.00364e-08	0	18.7123	100001	100002	100003
37.6	0	12.0785	0	28.257	20.8659	33.1316	27.4258	6.69522e-08	0	18.7123	100001	100002	100003
37.65	0	12.0785	0	28.257	20.8659	33.1316	27.4258	6.40038e-08	0	18.7123	100001	100002	100003
37.7	0	12.0785	0	28.257	20.8659	33.1316	27.4258	6.11852e-08	0	18.7123	100001	100002	100003
37.75	0	12.0785	0	28.257	20.8659	33.1316	27.4258	5.84908e-08	0	18.7123	100001	100002	100003
37.8	0	12.0785	0	28.257	20.8659	33.1316	27.4258	5.5915e-08	0	18.7123	100001	100002	100003
37.85	0	12.0785	0	28.257	20.8659	33.1316	27.4258	5.34526e-08	0	18.7123	100001	100002	100003
37.9	0	12.0785	0	28.257	20.8659	33.1316	27.4258	5.10987e-08	0	18.7123	100001	100002	100003
37.95	0	12.0785	0	28.257	20.8659	33.1316	27.4258	4.88485e-08	0	18.7123	100001	100002	100003
38	0	12.0785	0	28.257	20.8659	33.1316	27.4258	4.66973e-08	0	18.7123	100001	100002	100003
38.05	0	12.0785	0	28.257	20.8659	33.1316	27.4258	4.46409e-08	0	18.7123	100001	100002	100003
38.1	0	12.0785	0	28.257	20.8659	33.1316	27.4258	4.2675e-08	0	18.7123	100001	100002	100003
38.15	0	12.0785	0	28.257	20.8659	33.1316	27.4258	4.07957e-08	0	18.7123	100001	100002	100003
38.2	0	12.0785	0	28.257	20.8659	33.1316	27.4258	3.89991e-08	0	18.7123	100001	100002	100003
38.25	0	12.0785	0	28.257	20.8659	33.1316	27.4258	3.72817e-08	0	18.7123	100001	100002	100003
38.3	0	12.0785	0	28.257	20.8659	33.1316	27.4258	3.56399e-08	0	18.7123	100001	100002	100003
38.35	0	12.0785	0	28.257	20.8659	33.1316	27.4258	3.40704e-08	0	18.7123	100001	100002	100003
38.4	0	12.0785	0	28.257	20.8659	33.1316	27.4258	3.257e-08	0	18.7123	100001	100002	100003
38.45	0	12.0785	0	28.257	20.8659	33.1316	27.4258	3.11357e-08	0	18.7123	100001	100002	100003
38.5	0	12.0785	0	28.257	20.8659	33.1316	27.4258	2.97646e-08	0	18.7123	100001	100002	100003
38.55	0	12.0785	0	28.257	20.8659	33.1316	27.4258	2.84538e-08	0	18.7123	100001	100002	100003
38.6	0	12.0785	0	28.257	20.8659	33.1316	27.4258	2.72008e-08	0	18.7123	100001	100002	100003
38.65	0	12.0785	0	28.257	20.8659	33.1316	27.4258	2.60029e-08	0	18.7123	100001	100002	100003
38.7	0	12.0785	0	28.257	20.8659	33.1316	27.4258	2.48578e-08	0	18.7123	100001	100002	100003
38.75	0	12.0785	0	28.257	20.8659	33.1316	27.4258	2.37632e-08	0	18.7123	100001	100002	100003
38.8	0	12.0785	0	28.257	20.8659	33.1316	27.4258	2.27168e-08	0	18.7123	100001	100002	100003
38.85	0	12.0785	0	28.257	20.8659	33.1316	27.4258	2.17165e-08	0	18.7123	100001	100002	100003
38.9	0	12.0785	0	28.257	20.8659	33.1316	27.4258	2.07603e-08	0	18.7123	100001	100002	100003
38.95	0	12.0785	0	28.257	20.8659	33.1316	27.4258	1.98462e-08	0	18.7123	100001	100002	100003
39	0	12.0785	0	28.257	20.8659	33.1316	27.4258	1.89724e-08	0	18.7123	100001	100002	100003
39.05	0	12.0785	0	28.257	20.8659	33.1316	27.4258	1.81372e-08	0	18.7123	100001	100002	100003
39.1	0	12.0785	0	28.257	20.8659	33.1316	27.4258	1.73388e-08	0	18.7123	100001	100002	100003
39.15	0	12.0785	0	28.257	20.8659	33.1316	27.4258	1.65755e-08	0	18.7123	100001	100002	100003
39.2	0	12.0785	0	28.257	20.8659	33.1316	27.4258	1.58458e-08	0	18.7123	100001	100002	100003
39.25	0	12.0785	0	28.257	20.8659	33.1316	27.4258	1.51481e-08	0	18.7123	100001	100002	100003
39.3	0	12.0785	0	28.257	20.8659	33.1316	27.4258	1.44813e-08	0	18.7123	100001	100002	100003
39.35	0	12.0785	0	28.257	20.8659	33.1316	27.4258	1.38438e-08	0	18.7123	100001	100002	100003
39.4	0	12.0785	0	28.257	20.8659	33.1316	27.4258	1.32344e-08	0	18.7123	100001	100002	100003
39.45	0	12.0785	0	28.257	20.8659	33.1316	27.4258	1.26518e-08	0	18.7123	100001	100002	100003
39.5	0	12.0785	0	28.257	20.8659	33.1316	27.4258	1.20947e-08	0	18.7123	100001	100002	100003
39.55	0	12.0785	0	28.257	20.8659	33.1316	27.4258	1.15622e-08	0	18.7123	100001	100002	100003
39.6	0	12.0785	0	28.257	20.8659	33.1316	27.4258	1.10531e-08	0	18.7123	100001	100002	100003
39.65	0	12.0785	0	28.257	20.8659	33.1316	27.4258	1.05665e-08	0	18.7123	100001	100002	100003
39.7	0	12.0785	0	28.257	20.8659	33.1316	27.4258	1.01012e-08	0	18.7123	100001	100002	100003
39.75	0	12.0785	0	28.257	20.8659	33.1316	27.4258	9.6564e-09	0	18.7123	100001	100002	100003
39.8	0	12.0785	0	28.257	20.8659	33.1316	27.4258	9.23116e-09	0	18.7123	100001	100002	100003
39.85	0	12.0785	0	28.257	20.8659	33.1316	27.4258	8.82469e-09	0	18.7123	100001	100002	100003
39.9	0	12.0785	0	28.257	20.8659	33.1316	27.4258	8.43613e-09	0	18.7123	100001	100002	100003
39.95	0	12.0785	0	28.257	20.8659	33.1316	27.4258	8.06469e-09	0	18.7123	100001	100002	100003
40	0	12.0785	0	28.257	20.8659	33.1316	27.4258	7.70962e-09	0	18.7123	100001	100002	100003
40.05	0	12.0785	0	28.257	20.8659	33.1316	27.4258	7.37021e-09	0	18.7123	100001	100002	100003
40.1	0	12.0785	0	28.257	20.8659	33.1316	27.4258	7.04577e-09	0	18.7123	100001	100002	100003
40.15	0	12.0785	0	28.257	20.8659	33.1316	27.4258	6.73562e-09	0	18.7123	100001	100002	100003
40.2	0	12.0785	0	28.257	20.8659	33.1316	27.4258	6.43914e-09	0	18.7123	100001	100002	100003
40.25	0	12.0785	0	28.257	20.8659	33.1316	27.4258	6.15569e-09	0	18.7123	100001	100002	100003
40.3	0	12.0785	0	28.257	20.8659	33.1316	27.4258	5.88467e-09	0	18.7123	100001	100002	100003
40.35	0	12.0785	0	28.257	20.8659	33.1316	27.4258	5.62575e-09	0	18.7123	100001	100002	100003
40.4	0	12.0785	0	28.257	20.8659	33.1316	27.4258	5.37841e-09	0	18.7123	100001	100002	100003
40.45	0	12.0785	0	28.257	20.8659	33.1316	27.4258	5.14208e-09	0	18.7123	100001	100002	100003
40.5	0	12.0785	0	28.257	20.8659	33.1316	27.4258	4.91624e-09	0	18.7123	100001	100002	100003
40.55	0	12.0785	0	28.257	20.8659	33.1316	27.4258	4.70041e-09	0	18.7123	100001	100002	100003
40.6	0	12.0785	0	28.257	20.8659	33.1316	27.4258	4.49411e-09	0	18.7123	100001	100002	100003
40.65	0	12.0785	0	28.257	20.8659	33.1316	27.4258	4.29687e-09	0	18.7123	100001	100002	100003
40.7	0	12.0785	0	28.257	20.8659	33.1316	27.4258	4.1082e-09	0	18.7123	100001	100002	100003
40.75	0	12.0785	0	28.257	20.8659	33.1316	27.4258	3.92762e-09	0	18.7123	100001	100002	100003
40.8	0	12.0785	0	28.257	20.8659	33.1316	27.4258	3.75468e-09	0	18.7123	100001	100002	100003
40.85	0	12.0785	0	28.257	20.8659	33.1316	27.4258	3.58986e-09	0	18.7123	100001	100002	100003
40.9	0	12.0785	0	28.257	20.8659	33.1316	27.4258	3.43226e-09	0	18.7123	100001	100002	100003
40.95	0	12.0785	0	28.257	20.8659	33.1316	27.4258	3.28152e-09	0	18.7123	100001	100002	100003
41	0	12.0785	0	28.257	20.8659	33.1316	27.4258	3.13732e-09	0	18.7123	100001	100002	100003
41.05	0	12.0785	0	28.257	20.8659	33.1316	27.4258	2.99935e-09	0	18.7123	100001	100002	100003
41.1	0	12.0785	0	28.257	20.8659	33.1316	27.4258	2.8673e-09	0	18.7123	100001	100002	100003
41.15	0	12.0785	0	28.257	20.8659	33.1316	27.4258	2.74097e-09	0	18.7123	100001	100002	100003
41.2	0	12.0785	0	28.257	20.8659	33.1316	27.4258	2.62023e-09	0	18.7123	100001	100002	100003
41.25	0	12.0785	0	28.257	20.8659	33.1316	27.4258	2.50475e-09	0	18.7123	100001	100002	100003
41.3	0	12.0785	0	28.257	20.8659	33.1316	27.4258	2.39431e-09	0	18.7123	100001	100002	100003
41.35	0	12.0785	0	28.257	20.8659	33.1316	27.4258	2.28871e-09	0	18.7123	100001	100002	100003
41.4	0	12.0785	0	28.257	20.8659	33.1316	27.4258	2.18777e-09	0	18.7123	100001	100002	100003
41.45	0	12.0785	0	28.257	20.8659	33.1316	27.4258	2.09131e-09	0	18.7123	100001	100002	100003
41.5	0	12.0785	0	28.257	20.8659	33.1316	27.4258	1.99905e-09	0	18.7123	100001	100002	100003
41.55	0	12.0785	0	28.257	20.8659	33.1316	27.4258	1.9108e-09	0	18.7123	100001	100002	100003
41.6	0	12.0785	0	28.257	20.8659	33.1316	27.4258	1.82646e-09	0	18.7123	100001	100002	100003
41.65	0	12.0785	0	28.257	20.8659	33.1316	27.4258	1.74586e-09	0	18.7123	100001	100002	100003
41.7	0	12.0785	0	28.257	20.8659	33.1316	27.4258	1.66885e-09	0	18.7123	100001	100002	100003
41.75	0	12.0785	0	28.257	20.8659	33.1316	27.4258	1.59528e-09	0	18.7123	100001	100002	100003
41.8	0	12.0785	0	28.257	20.8659	33.1316	27.4258	1.52502e-09	0	18.7123	100001	100002	100003
41.85	0	12.0785	0	28.257	20.8659	33.1316	27.4258	1.45785e-09	0	18.7123	100001	100002	100003
41.9	0	12.0785	0	28.257	20.8659	33.1316	27.4258	1.39367e-09	0	18.7123	100001	100002	100003
41.95	0	12.0785	0	28.257	20.8659	33.1316	27.4258	1.33234e-09	0	18.7123	100001	100002	100003
42	0	12.0785	0	28.257	20.8659	33.1316	27.4258	1.27372e-09	0	18.7123	100001	100002	100003
42.05	0	12.0785	0	28.257	20.8659	33.1316	27.4258	1.21767e-09	0	18.7123	100001	100002	100003
42.1	0	12.0785	0	28.257	20.8659	33.1316	27.4258	1.16404e-09	0	18.7123	100001	100002	100003
42.15	0	12.0785	0	28.257	20.8659	33.1316	27.4258	1.11276e-09	0	18.7123	100001	100002	100003
42.2	0	12.0785	0	28.257	20.8659	33.1316	27.4258	1.06386e-09	0	18.7123	100001	100002	100003
42.25	0	12.0785	0	28.257	20.8659	33.1316	27.4258	1.01711e-09	0	18.7123	100001	100002	100003
42.3	0	12.0785	0	28.257	20.8659	33.1316	27.4258	9.72411e-10	0	18.7123	100001	100002	100003
42.35	0	12.0785	0	28.257	20.8659	33.1316	27.4258	9.2967e-10	0	18.7123	100001	100002	100003
42.4	0	12.0785	0	28.257	20.8659	33.1316	27.4258	8.88781e-10	0	18.7123	100001	100002	100003
42.45	0	12.0785	0	28.257	20.8659	33.1316	27.4258	8.49648e-10	0	18.7123	100001	100002	100003
42.5	0	12.0785	0	28.257	20.8659	33.1316	27.4258	8.12264e-10	0	18.7123	100001	100002	100003
42.55	0	12.0785	0	28.257	20.8659	33.1316	27.4258	7.76554e-10	0	18.7123	100001	100002	100003
42.6	0	12.0785	0	28.257	20.8659	33.1316	27.4258	7.42421e-10	0	18.7123	100001	100002	100003
42.65	0	12.0785	0	28.257	20.8659	33.1316	27.4258	7.09798e-10	0	18.7123	100001	100002	100003
42.7	0	12.0785	0	28.257	20.8659	33.1316	27.4258	6.78626e-10	0	18.7123	100001	100002	100003
42.75	0	12.0785	0	28.257	20.8659	33.1316	27.4258	6.48847e-10	0	18.7123	100001	100002	100003
42.8	0	12.0785	0	28.257	20.8659	33.1316	27.4258	6.2041e-10	0	18.7123	100001	100002	100003
42.85	0	12.0785	0	28.257	20.8659	33.1316	27.4258	5.93169e-10	0	18.7123	100001	100002	100003
42.9	0	12.0785	0	28.257	20.8659	33.1316	27.4258	5.67116e-10	0	18.7123	100001	100002	100003
42.95	0	12.0785	0	28.257	20.8659	33.1316	27.4258	5.42194e-10	0	18.7123	100001	100002	100003
43	0	12.0785	0	28.257	20.8659	33.1316	27.4258	5.18347e-10	0	18.7123	100001	100002	100003
43.05	0	12.0785	0	28.257	20.8659	33.1316	27.4258	4.95517e-10	0	18.7123	100001	100002	100003
43.1	0	12.0785	0	28.257	20.8659	33.1316	27.4258	4.73651e-10	0	18.7123	100001	100002	100003
43.15	0	12.0785	0	28.257	20.8659	33.1316	27.4258	4.52727e-10	0	18.7123	100001	100002	100003
43.2	0	12.0785	0	28.257	20.8659	33.1316	27.4258	4.32768e-10	0	18.7123	100001	100002	100003
43.25	0	12.0785	0	28.257	20.8659	33.1316	27.4258	4.13691e-10	0	18.7123	100001	100002	100003
43.3	0	12.0785	0	28.257	20.8659	33.1316	27.4258	3.95465e-10	0	18.7123	100001	100002	100003
43.35	0	12.0785	0	28.257	20.8659	33.1316	27.4258	3.78062e-10	0	18.7123	100001	100002	100003
43.4	0	12.0785	0	28.257	20.8659	33.1316	27.4258	3.61456e-10	0	18.7123	100001	100002	100003
43.45	0	12.0785	0	28.257	20.8659	33.1316	27.4258	3.45625e-10	0	18.7123	100001	100002	100003
43.5	0	12.0785	0	28.257	20.8659	33.1316	27.4258	3.30473e-10	0	18.7123	100001	100002	100003
43.55	0	12.0785	0	28.257	20.8659	33.1316	27.4258	3.15963e-10	0	18.7123	100001	100002	100003
43.6	0	12.0785	0	28.257	20.8659	33.1316	27.4258	3.02084e-10	0	18.7123	100001	100002	100003
43.65	0	12.0785	0	28.257	20.8659	33.1316	27.4258	2.88802e-10	0	18.7123	100001	100002	100003
43.7	0	12.0785	0	28.257	20.8659	33.1316	27.4258	2.76079e-10	0	18.7123	100001	100002	100003
43.75	0	12.0785	0	28.257	20.8659	33.1316	27.4258	2.63877e-10	0	18.7123	100001	100002	100003
43.8	0	12.0785	0	28.257	20.8659	33.1316	27.4258	2.52155e-10	0	18.7123	100001	100002	100003
43.85	0	12.0785	0	28.257	20.8659	33.1316	27.4258	2.41036e-10	0	18.7123	100001	100002	100003
43.9	0	12.0785	0	28.257	20.8659	33.1316	27.4258	2.30414e-10	0	18.7123	100001	100002	100003
43.95	0	12.0785	0	28.257	20.8659	33.1316	27.4258	2.20274e-10	0	18.7123	100001	100002	100003
44	0	12.0785	0	28.257	20.8659	33.1316	27.4258	2.10604e-10	0	18.7123	100001	100002	100003
44.05	0	12.0785	0	28.257	20.8659	33.1316	27.4258	2.01393e-10	0	18.7123	100001	100002	100003
44.1	0	12.0785	0	28.257	20.8659	33.1316	27.4258	1.92632e-10	0	18.7123	100001	100002	100003
44.15	0	12.0785	0	28.257	20.8659	33.1316	27.4258	1.84279e-10	0	18.7123	100001	100002	100003
44.2	0	12.0785	0	28.257	20.8659	33.1316	27.4258	1.76241e-10	0	18.7123	100001	100002	100003
44.25	0	12.0785	0	28.257	20.8659	33.1316	27.4258	1.68551e-10	0	18.7123	100001	100002	100003
44.3	0	12.0785	0	28.257	20.8659	33.1316	27.4258	1.61182e-10	0	18.7123	100001	100002	100003
44.35	0	12.0785	0	28.257	20.8659	33.1316	27.4258	1.54109e-10	0	18.7123	100001	100002	100003
44.4	0	12.0785	0	28.257	20.8659	33.1316	27.4258	1.47304e-10	0	18.7123	100001	100002	100003
44.45	0	12.0785	0	28.257	20.8659	33.1316	27.4258	1.40736e-10	0	18.7123	100001	100002	100003
44.5	0	12.0785	0	28.257	20.8659	33.1316	27.4258	1.34481e-10	0	18.7123	100001	100002	100003
44.55	0	12.0785	0	28.257	20.8659	33.1316	27.4258	1.28543e-10	0	18.7123	100001	100002	100003
44.6	0	12.0785	0	28.257	20.8659	33.1316	27.4258	1.22876e-10	0	18.7123	100001	100002	100003
44.65	0	12.0785	0	28.257	20.8659	33.1316	27.4258	1.17478e-10	0	18.7123	100001	100002	100003
44.7	0	12.0785	0	28.257	20.8659	33.1316	27.4258	1.12349e-10	0	18.7123	100001	100002	100003
44.75	0	12.0785	0	28.257	20.8659	33.1316	27.4258	1.07494e-10	0	18.7123	100001	100002	100003
44.8	0	12.0785	0	28.257	20.8659	33.1316	27.4258	1.02917e-10	0	18.7123	100001	100002	100003
44.85	0	12.0785	0	28.257	20.8659	33.1316	27.4258	9.84525e-11	0	18.7123	100001	100002	100003
44.9	0	12.0785	0	28.257	20.8659	33.1316	27.4258	9.41737e-11	0	18.7123	100001	100002	100003
44.95	0	12.0785	0	28.257	20.8659	33.1316	27.4258	9.00657e-11	0	18.7123	100001	100002	100003
45	0	12.0785	0	28.257	20.8659	33.1316	27.4258	8.61089e-11	0	18.7123	100001	100002	100003
45.05	0	12.0785	0	28.257	20.8659	33.1316	27.4258	8.22819e-11	0	18.7123	100001	100002	100003
45.1	0	12.0785	0	28.257	20.8659	33.1316	27.4258	7.8561e-11	0	18.7123	100001	100002	100003
45.15	0	12.0785	0	28.257	20.8659	33.1316	27.4258	7.49642e-11	0	18.7123	100001	100002	100003
45.2	0	12.0785	0	28.257	20.8659	33.1316	27.4258	7.15797e-11	0	18.7123	100001	100002	100003
45.25	0	12.0785	0	28.257	20.8659	33.1316	27.4258	6.83337e-11	0	18.7123	100001	100002	100003
45.3	0	12.0785	0	28.257	20.8659	33.1316	27.4258	6.52257e-11	0	18.7123	100001	100002	100003
45.35	0	12.0785	0	28.257	20.8659	33.1316	27.4258	6.2257e-11	0	18.7123	100001	100002	100003
45.4	0	12.0785	0	28.257	20.8659	33.1316	27.4258	5.94311e-11	0	18.7123	100001	100002	100003
45.45	0	12.0785	0	28.257	20.8659	33.1316	27.4258	5.67535e-11	0	18.7123	100001	100002	100003
45.5	0	12.0785	0	28.257	20.8659	33.1316	27.4258	5.41772e-11	0	18.7123	100001	100002	100003
45.55	0	12.0785	0	28.257	20.8659	33.1316	27.4258	5.16902e-11	0	18.7123	100001	100002	100003
45.6	0	12.0785	0	28.257	20.8659	33.1316	27.4258	4.93114e-11	0	18.7123	100001	100002	100003
45.65	0	12.0785	0	28.257	20.8659	33.1316	27.4258	4.70368e-11	0	18.7123	100001	100002	100003
45.7	0	12.0785	0	28.257	20.8659	33.1316	27.4258	4.4862e-11	0	18.7123	100001	100002	100003
45.75	0	12.0785	0	28.257	20.8659	33.1316	27.4258	4.27828e-11	0	18.7123	100001	100002	100003
45.8	0	12.0785	0	28.257	20.8659	33.1316	27.4258	4.07944e-11	0	18.7123	100001	100002	100003
45.85	0	12.0785	0	28.257	20.8659	33.1316	27.4258	3.89048e-11	0	18.7123	100001	100002	100003
45.9	0	12.0785	0	28.257	20.8659	33.1316	27.4258	3.71049e-11	0	18.7123	100001	100002	100003
45.95	0	12.0785	0	28.257	20.8659	33.1316	27.4258	3.53916e-11	0	18.7123	100001	100002	100003
46	0	12.0785	0	28.257	20.8659	33.1316	27.4258	3.37623e-11	0	18.7123	100001	100002	100003
46.05	0	12.0785	0	28.257	20.8659	33.1316	27.4258	3.22146e-11	0	18.7123	100001	100002	100003
46.1	0	12.0785	0	28.257	20.8659	33.1316	27.4258	3.07461e-11	0	18.7123	100001	100002	100003
46.15	0	12.0785	0	28.257	20.8659	33.1316	27.4258	2.93547e-11	0	18.7123	100001	100002	100003
46.2	0	12.0785	0	28.257	20.8659	33.1316	27.4258	2.80383e-11	0	18.7123	100001	100002	100003
46.25	0	12.0785	0	28.257	20.8659	33.1316	27.4258	2.6795e-11	0	18.7123	100001	100002	100003
46.3	0	12.0785	0	28.257	20.8659	33.1316	27.4258	2.5623e-11	0	18.7123	100001	100002	100003
46.35	0	12.0785	0	28.257	20.8659	33.1316	27.4258	2.4487e-11	0	18.7123	100001	100002	100003
46.4	0	12.0785	0	28.257	20.8659	33.1316	27.4258	2.33985e-11	0	18.7123	100001	100002	100003
46.45	0	12.0785	0	28.257	20.8659	33.1316	27.4258	2.23629e-11	0	18.7123	100001	100002	100003
46.5	0	12.0785	0	28.257	20.8659	33.1316	27.4258	2.13775e-11	0	18.7123	100001	100002	100003
46.55	0	12.0785	0	28.257	20.8659	33.1316	27.4258	2.04403e-11	0	18.7123	100001	100002	100003
46.6	0	12.0785	0	28.257	20.8659	33.1316	27.4258	1.95489e-11	0	18.7123	100001	100002	100003
46.65	0	12.0785	0	28.257	20.8659	33.1316	27.4258	1.87015e-11	0	18.7123	100001	100002	100003
46.7	0	12.0785	0	28.257	20.8659	33.1316	27.4258	1.7896e-11	0	18.7123	100001	100002	100003
46.75	0	12.0785	0	28.257	20.8659	33.1316	27.4258	1.71309e-11	0	18.7123	100001	100002	100003
46.8	0	12.0785	0	28.257	20.8659	33.1316	27.4258	1.64047e-11	0	18.7123	100001	100002	100003
46.85	0	12.0785	0	28.257	20.8659	33.1316	27.4258	1.57157e-11	0	18.7123	100001	100002	100003
46.9	0	12.0785	0	28.257	20.8659	33.1316	27.4258	1.50629e-11	0	18.7123	100001	100002	100003
46.95	0	12.0785	0	28.257	20.8659	33.1316	27.4258	1.44451e-11	0	18.7123	100001	100002	100003
47	0	12.0785	0	28.257	20.8659	33.1316	27.4258	1.38614e-11	0	18.7123	100001	100002	100003
47.05	0	12.0785	0	28.257	20.8659	33.1316	27.4258	1.33109e-11	0	18.7123	100001	100002	100003
47.1	0	12.0785	0	28.257	20.8659	33.1316	27.4258	1.27929e-11	0	18.7123	100001	100002	100003
47.15	0	12.0785	0	28.257	20.8659	33.1316	27.4258	1.23071e-11	0	18.7123	100001	100002	100003
47.2	0	12.0785	0	28.257	20.8659	33.1316	27.4258	1.18129e-11	0	18.7123	100001	100002	100003
47.25	0	12.0785	0	28.257	20.8659	33.1316	27.4258	1.13342e-11	0	18.7123	100001	100002	100003
47.3	0	12.0785	0	28.257	20.8659	33.1316	27.4258	1.08757e-11	0	18.7123	100001	100002	100003
47.35	0	12.0785	0	28.257	20.8659	33.1316	27.4258	1.04365e-11	0	18.7123	100001	100002	100003
47.4	0	12.0785	0	28.257	20.8659	33.1316	27.4258	1.0016e-11	0	18.7123	100001	100002	100003
47.45	0	12.0785	0	28.257	20.8659	33.1316	27.4258	9.61327e-12	0	18.7123	100001	100002	100003
47.5	0	12.0785	0	28.257	20.8659	33.1316	27.4258	9.2279e-12	0	18.7123	100001	100002	100003
47.55	0	12.0785	0	28.257	20.8659	33.1316	27.4258	8.85942e-12	0	18.7123	100001	100002	100003
47.6	0	12.0785	0	28.257	20.8659	33.1316	27.4258	8.50749e-12	0	18.7123	100001	100002	100003
47.65	0	12.0785	0	28.257	20.8659	33.1316	27.4258	8.17191e-12	0	18.7123	100001	100002	100003
47.7	0	12.0785	0	28.257	20.8659	33.1316	27.4258	7.85256e-12	0	18.7123	100001	100002	100003
47.75	0	12.0785	0	28.257	20.8659	33.1316	27.4258	7.54948e-12	0	18.7123	100001	100002	100003
47.8	0	12.0785	0	28.257	20.8659	33.1316	27.4258	7.2628e-12	0	18.7123	100001	100002	100003
47.85	0	12.0785	0	28.257	20.8659	33.1316	27.4258	6.99276e-12	0	18.7123	100001	100002	100003
47.9	0	12.0785	0	28.257	20.8659	33.1316	27.4258	6.73975e-12	0	18.7123	100001	100002	100003
47.95	0	12.0785	0	28.257	20.8659	33.1316	27.4258	6.50424e-12	0	18.7123	100001	100002	100003
48	0	12.0785	0	28.257	20.8659	33.1316	27.4258	6.28684e-12	0	18.7123	100001	100002	100003
48.05	0	12.0785	0	28.257	20.8659	33.1316	27.4258	6.04051e-12	0	18.7123	100001	100002	100003

## Sheet: BH14
Time	RI	FP	BH	fructose	formate	acetate	butyrate	unknown compound	H20	CO2	lag_RI	lag_FP	lag_BH
0.05	0	0	0.0850547	49.9112	47.5487	1.23233	0	30	0.0153924	0.00666079	0.111211	0.112734	0.0109544
0.1	0	0	0.0850942	49.9112	47.5487	1.23235	0	30	0.015436	0.00669245	0.123677	0.127088	0.0119998
0.15	0	0	0.0851376	49.9112	47.5486	1.23238	0	30	0.0154836	0.00672711	0.137542	0.14327	0.013145
0.2	0	0	0.085185	49.9111	47.5486	1.23241	0	30	0.0155358	0.00676505	0.15296	0.161513	0.0143995
0.25	0	0	0.0852369	49.9111	47.5486	1.23244	0	30	0.0155929	0.00680658	0.170107	0.182078	0.0157737
0.3	0	0	0.0852937	49.9111	47.5485	1.23248	0	30	0.0156554	0.00685204	0.189177	0.205262	0.017279
0.35	0	0	0.0853559	49.9111	47.5485	1.23251	0	30	0.0157238	0.0069018	0.210384	0.231399	0.018928
0.4	0	0	0.085424	49.9111	47.5485	1.23256	0	30	0.0157987	0.00695626	0.233968	0.260863	0.0207344
0.45	0	0	0.0854985	49.911	47.5484	1.2326	0	30	0.0158806	0.00701585	0.260197	0.29408	0.0227132
0.5	0	0	0.08558	49.911	47.5484	1.23265	0	30	0.0159703	0.00708106	0.289366	0.331525	0.0248808
0.55	0	0	0.0856692	49.911	47.5483	1.23271	0	30	0.0160684	0.0071524	0.321804	0.373739	0.0272553
0.6	0	0	0.0857667	49.911	47.5483	1.23277	0	30	0.0161757	0.00723045	0.357879	0.421328	0.0298564
0.65	0	0	0.0858735	49.9109	47.5482	1.23283	0	30	0.0162931	0.00731582	0.397998	0.474977	0.0327057
0.7	0	0	0.0859902	49.9109	47.5481	1.23291	0	30	0.0164215	0.00740919	0.442615	0.535457	0.035827
0.75	0	0	0.0861178	49.9109	47.5481	1.23298	0	30	0.0165619	0.0075113	0.492233	0.603638	0.0392461
0.8	0	0	0.0862573	49.9108	47.548	1.23307	0	30	0.0167154	0.00762293	0.547414	0.680501	0.0429915
0.85	0	0	0.0864099	49.9108	47.5479	1.23316	0	30	0.0168832	0.00774497	0.60878	0.76715	0.0470944
0.9	0	0	0.0865766	49.9107	47.5478	1.23327	0	30	0.0170666	0.00787835	0.677026	0.864833	0.0515888
0.95	0	0	0.0867588	49.9107	47.5477	1.23338	0	30	0.017267	0.00802411	0.752922	0.974954	0.0565122
1	0	0	0.0869578	49.9106	47.5476	1.2335	0	30	0.0174859	0.00818334	0.837326	1.0991	0.0619054
1.05	0	0	0.0871752	49.9105	47.5475	1.23364	0	30	0.0177251	0.00835726	0.931192	1.23905	0.0678133
1.1	0	0	0.0874126	49.9105	47.5473	1.23378	0	30	0.0179862	0.00854717	1.03558	1.39682	0.074285
1.15	0	0	0.0876718	49.9104	47.5472	1.23394	0	30	0.0182713	0.00875449	1.15167	1.57468	0.0813744
1.2	0	0	0.0879546	49.9103	47.547	1.23412	0	30	0.0185824	0.00898073	1.28078	1.77519	0.0891403
1.25	0	0	0.0882631	49.9102	47.5468	1.23431	0	30	0.0189217	0.00922755	1.42436	2.00122	0.0976473
1.3	0	0	0.0885996	49.9101	47.5466	1.23452	0	30	0.0192918	0.00949672	1.58403	2.25605	0.106966
1.35	0	0	0.0889664	49.91	47.5464	1.23474	0	30	0.0196953	0.00979014	1.7616	2.54331	0.117175
1.4	0	0	0.089366	49.9099	47.5462	1.23499	0	30	0.0201349	0.0101099	1.95908	2.86716	0.128357
1.45	0	0	0.0898014	49.9098	47.5459	1.23526	0	30	0.0206138	0.0104582	2.1787	3.23224	0.140607
1.5	0	0	0.0902753	49.9096	47.5457	1.23555	0	30	0.0211351	0.0108373	2.42294	3.64381	0.154025
1.55	0	0	0.090791	49.9095	47.5454	1.23587	0	30	0.0217024	0.0112499	2.69456	4.10778	0.168725
1.6	0	0	0.0913518	49.9093	47.545	1.23621	0	30	0.0223193	0.0116985	2.99662	4.63084	0.184827
1.65	0	0	0.0919614	49.9091	47.5447	1.23659	0	30	0.0229898	0.0121862	3.33255	5.22049	0.202466
1.7	0	0	0.0926235	49.9089	47.5443	1.237	0	30	0.0237182	0.0127159	3.70614	5.88523	0.221788
1.75	0	0	0.0933422	49.9087	47.5439	1.23744	0	30	0.0245088	0.0132908	4.1216	6.63461	0.242954
1.8	0	0	0.0941219	49.9085	47.5434	1.23792	0	30	0.0253664	0.0139145	4.58364	7.47941	0.266141
1.85	0	0	0.0949669	49.9082	47.543	1.23844	0	30	0.0262959	0.0145906	5.09748	8.43178	0.291539
1.9	0	0	0.0958822	49.9079	47.5424	1.23901	0	30	0.0273028	0.0153228	5.66892	9.50541	0.319362
1.95	0	0	0.0968728	49.9076	47.5419	1.23962	0	30	0.0283923	0.0161153	6.30442	10.7158	0.349841
2	0	0	0.0979438	49.9073	47.5412	1.24028	0	30	0.0295705	0.0169721	7.01116	12.0802	0.383227
2.05	0	0	0.0991009	49.907	47.5406	1.241	0	30	0.0308432	0.0178977	7.79713	13.6184	0.419801
2.1	0	0	0.10035	49.9066	47.5399	1.24177	0	30	0.0322169	0.0188968	8.67121	15.3525	0.459864
2.15	0	0	0.101696	49.9062	47.5391	1.2426	0	30	0.0336981	0.019974	9.64327	17.3074	0.503751
2.2	0	0	0.103147	49.9058	47.5382	1.24349	0	30	0.0352936	0.0211344	10.7243	19.5111	0.551826
2.25	0	0	0.104707	49.9053	47.5373	1.24445	0	30	0.0370105	0.022383	11.9265	21.9955	0.604489
2.3	0	0	0.106385	49.9048	47.5364	1.24549	0	30	0.038856	0.0237252	13.2635	24.7963	0.662179
2.35	0	0	0.108187	49.9042	47.5353	1.2466	0	30	0.0408375	0.0251663	14.7504	27.9536	0.725373
2.4	0	0	0.110119	49.9037	47.5342	1.24779	0	30	0.0429629	0.0267121	16.4039	31.513	0.794599
2.45	0	0	0.112189	49.903	47.533	1.24907	0	30	0.04524	0.0283681	18.2429	35.5257	0.870431
2.5	0	0	0.114404	49.9024	47.5317	1.25044	0	30	0.0476768	0.0301403	20.2879	40.0492	0.9535
2.55	0	0	0.116772	49.9017	47.5304	1.2519	0	30	0.0502816	0.0320347	22.5623	45.1488	1.0445
2.6	0	0	0.1193	49.9009	47.5289	1.25346	0	30	0.0530628	0.0340574	25.0915	50.8977	1.14418
2.65	0	0	0.121997	49.9001	47.5274	1.25512	0	30	0.0560289	0.0362146	27.9044	57.3786	1.25337
2.7	0	0	0.124869	49.8992	47.5257	1.25689	0	30	0.0591887	0.0385126	31.0325	64.6848	1.37299
2.75	0	0	0.127926	49.8983	47.5239	1.25878	0	30	0.0625509	0.0409579	34.5113	72.9212	1.50402
2.8	0	0	0.131175	49.8974	47.5221	1.26078	0	30	0.0661247	0.043557	38.3801	82.2064	1.64755
2.85	0	0	0.134625	49.8963	47.5201	1.26291	0	30	0.0699193	0.0463167	42.6826	92.674	1.80479
2.9	0	0	0.138283	49.8952	47.518	1.26517	0	30	0.0739439	0.0492437	47.4674	104.474	1.97702
2.95	0	0	0.14216	49.8941	47.5157	1.26756	0	30	0.0782081	0.0523449	52.7887	117.777	2.1657
3	0	0	0.146263	49.8928	47.5134	1.27009	0	30	0.0827216	0.0556275	58.7064	132.774	2.37238
3.05	0	0	0.150602	49.8915	47.5109	1.27277	0	30	0.0874944	0.0590986	65.2875	149.681	2.59879
3.1	0	0	0.155186	49.8902	47.5082	1.2756	0	30	0.0925367	0.0627657	72.6064	168.74	2.8468
3.15	0	0	0.160024	49.8887	47.5054	1.27858	0	30	0.0978588	0.0666363	80.7458	190.226	3.11849
3.2	0	0	0.165126	49.8872	47.5025	1.28173	0	30	0.103471	0.0707182	89.7975	214.448	3.4161
3.25	0	0	0.170503	49.8856	47.4994	1.28505	0	30	0.109386	0.0750194	99.8641	241.754	3.74211
3.3	0	0	0.176164	49.8839	47.4961	1.28854	0	30	0.115613	0.0795482	111.059	272.537	4.09924
3.35	0	0	0.18212	49.8821	47.4927	1.29222	0	30	0.122164	0.084313	123.509	307.24	4.49045
3.4	0	0	0.188382	49.8802	47.4891	1.29608	0	30	0.129052	0.0893226	137.355	346.361	4.91899
3.45	0	0	0.194961	49.8782	47.4853	1.30014	0	30	0.13629	0.0945861	152.752	390.464	5.38843
3.5	0	0	0.20187	49.8762	47.4813	1.3044	0	30	0.143889	0.100113	169.876	440.183	5.90268
3.55	0	0	0.209119	49.874	47.4771	1.30888	0	30	0.151864	0.105913	188.92	496.232	6.466
3.6	0	0	0.216723	49.8717	47.4727	1.31357	0	30	0.160228	0.111996	210.098	559.418	7.08307
3.65	0	0	0.224694	49.8693	47.4681	1.31849	0	30	0.168996	0.118372	233.651	630.65	7.75904
3.7	0	0	0.233046	49.8668	47.4633	1.32364	0	30	0.178183	0.125054	259.844	710.953	8.49952
3.75	0	0	0.241793	49.8642	47.4583	1.32904	0	30	0.187804	0.132051	288.973	801.48	9.31067
3.8	0	0	0.25095	49.8614	47.453	1.33469	0	30	0.197877	0.139377	321.367	903.534	10.1992
3.85	0	0	0.260532	49.8586	47.4474	1.3406	0	30	0.208418	0.147043	357.393	1018.58	11.1726
3.9	0	0	0.270556	49.8556	47.4417	1.34678	0	30	0.219444	0.155062	397.458	1148.28	12.2388
3.95	0	0	0.281038	49.8524	47.4356	1.35325	0	30	0.230974	0.163448	442.014	1294.49	13.4068
4	0	0	0.291996	49.8491	47.4293	1.36001	0	30	0.243028	0.172214	491.565	1459.33	14.6863
4.05	0	0	0.303449	49.8457	47.4227	1.36708	0	30	0.255626	0.181376	546.67	1645.14	16.0879
4.1	0	0	0.315415	49.8421	47.4158	1.37446	0	30	0.268788	0.190949	607.953	1854.62	17.6232
4.15	0	0	0.327914	49.8384	47.4086	1.38217	0	30	0.282537	0.200948	676.106	2090.78	19.3051
4.2	0	0	0.340966	49.8345	47.4011	1.39023	0	30	0.296895	0.21139	751.9	2357	21.1475
4.25	0	0	0.354595	49.8304	47.3932	1.39864	0	30	0.311887	0.222293	836.189	2657.12	23.1657
4.3	0	0	0.368822	49.8261	47.385	1.40741	0	30	0.327537	0.233675	929.928	2995.46	25.3765
4.35	0	0	0.383671	49.8216	47.3765	1.41657	0	30	0.34387	0.245554	1034.18	3376.88	27.7983
4.4	0	0	0.399166	49.817	47.3675	1.42614	0	30	0.360915	0.25795	1150.11	3806.87	30.4512
4.45	0	0	0.415333	49.8121	47.3582	1.43611	0	30	0.378699	0.270884	1279.04	4291.6	33.3573
4.5	0	0	0.4322	49.8071	47.3485	1.44652	0	30	0.397252	0.284377	1422.42	4838.06	36.5407
4.55	0	0	0.449793	49.8018	47.3384	1.45737	0	30	0.416604	0.298451	1581.88	5454.11	40.028
4.6	0	0	0.468142	49.7963	47.3278	1.46869	0	30	0.436788	0.31313	1759.21	6148.59	43.848
4.65	0	0	0.487276	49.7906	47.3168	1.4805	0	30	0.457836	0.328438	1956.42	6931.5	48.0326
4.7	0	0	0.507229	49.7846	47.3053	1.49281	0	30	0.479784	0.3444	2175.74	7814.11	52.6166
4.75	0	0	0.528033	49.7783	47.2933	1.50565	0	30	0.502668	0.361043	2419.65	8809.09	57.638
4.8	0	0	0.549721	49.7718	47.2808	1.51903	0	30	0.526526	0.378394	2690.9	9930.78	63.1387
4.85	0	0	0.57233	49.7651	47.2678	1.53298	0	30	0.551396	0.396481	2992.55	11195.3	69.1643
4.9	0	0	0.595898	49.758	47.2542	1.54752	0	30	0.57732	0.415335	3328.03	12620.8	75.765
4.95	0	0	0.620462	49.7506	47.2401	1.56267	0	30	0.60434	0.434987	3701.1	14227.8	82.9956
5	0	0	0.646063	49.7429	47.2254	1.57847	0	30	0.632502	0.455468	4116.01	16039.5	90.9162
5.05	0	0	0.672744	49.7349	47.21	1.59493	0	30	0.661851	0.476813	4577.42	18081.8	99.5928
5.1	0	0	0.700549	49.7266	47.194	1.61209	0	30	0.692436	0.499056	5090.56	20384.3	109.097
5.15	0	0	0.729522	49.7179	47.1774	1.62996	0	30	0.724306	0.522234	5661.23	22979.8	119.509
5.2	0	0	0.759711	49.7088	47.16	1.64859	0	30	0.757515	0.546386	6295.86	25905.9	130.914
5.25	0	0	0.791167	49.6994	47.1419	1.668	0	30	0.792116	0.571551	7001.64	29204.6	143.408
5.3	0	0	0.823941	49.6896	47.1231	1.68822	0	30	0.828167	0.59777	7786.54	32923.2	157.094
5.35	0	0	0.858085	49.6793	47.1034	1.70929	0	30	0.865726	0.625085	8659.43	37115.4	172.086
5.4	0	0	0.893657	49.6686	47.083	1.73124	0	30	0.904855	0.653542	9630.18	41841.4	188.509
5.45	0	0	0.930714	49.6575	47.0617	1.7541	0	30	0.945617	0.683188	10709.7	47169.2	206.5
5.5	0	0	0.969316	49.6459	47.0395	1.77792	0	30	0.98808	0.71407	11910.3	53175.3	226.207
5.55	0	0	1.00953	49.6339	47.0164	1.80273	0	30	1.03231	0.746239	13245.5	59946.3	247.795
5.6	0	0	1.05141	49.6213	46.9924	1.82857	0	30	1.07839	0.779747	14730.4	67579.4	271.443
5.65	0	0	1.09504	49.6082	46.9673	1.85549	0	30	1.12638	0.814649	16381.7	76184.4	297.348
5.7	0	0	1.14048	49.5945	46.9413	1.88353	0	30	1.17636	0.851001	18218.1	85885.1	325.725
5.75	0	0	1.18781	49.5803	46.9141	1.91273	0	30	1.22842	0.888862	20260.4	96821.1	356.81
5.8	0	0	1.2371	49.5655	46.8858	1.94314	0	30	1.28264	0.928295	22531.7	100001	390.864
5.85	0	0	1.28843	49.5501	46.8564	1.97481	0	30	1.33911	0.969361	25057.5	100001	428.165
5.9	0	0	1.34189	49.534	46.8257	2.0078	0	30	1.39791	1.01213	27866.5	100001	469.027
5.95	0	0	1.39756	49.5173	46.7938	2.04214	0	30	1.45915	1.05666	30990.5	100001	513.789
6	0	0	1.45553	49.4999	46.7606	2.07791	0	30	1.52292	1.10304	34464.7	100001	562.823
6.05	0	0	1.5159	49.4818	46.726	2.11516	0	30	1.58932	1.15134	38328.3	100001	616.536
6.1	0	0	1.57875	49.4629	46.69	2.15394	0	30	1.65846	1.20162	42624.9	100001	675.375
6.15	0	0	1.6442	49.4432	46.6526	2.19432	0	30	1.73046	1.25398	47403.2	100001	739.828
6.2	0	0	1.71235	49.4227	46.6136	2.23637	0	30	1.80542	1.3085	52717.1	100001	810.432
6.25	0	0	1.7833	49.4014	46.573	2.28014	0	30	1.88346	1.36525	58626.7	100001	887.775
6.3	0	0	1.85716	49.3792	46.5308	2.32572	0	30	1.96471	1.42435	65198.8	100001	972.498
6.35	0	0	1.93406	49.3561	46.4868	2.37317	0	30	2.0493	1.48587	72507.8	100001	1065.31
6.4	0	0	2.01412	49.332	46.4411	2.42256	0	30	2.13736	1.54991	80636.1	100001	1166.98
6.45	0	0	2.09745	49.307	46.3935	2.47398	0	30	2.22903	1.61658	89675.7	100001	1278.35
6.5	0	0	2.1842	49.2809	46.344	2.5275	0	30	2.32445	1.68598	99728.3	100001	1400.34
6.55	0	0	2.2745	49.2537	46.2924	2.58322	0	30	2.42378	1.75822	100002	100001	1533.98
6.6	0	0	2.36848	49.2254	46.2389	2.64121	0	30	2.52717	1.8334	100002	100001	1680.38
6.65	0	0	2.46631	49.196	46.1831	2.70156	0	30	2.63477	1.91166	100002	100001	1840.74
6.7	0	0	2.56811	49.1654	46.1251	2.76438	0	30	2.74676	1.99311	100002	100001	2016.42
6.75	0	0	2.67407	49.1335	46.0648	2.82975	0	30	2.86331	2.07787	100002	100001	2208.86
6.8	0	0	2.78433	49.1003	46.0021	2.89778	0	30	2.98459	2.16608	100002	100001	2419.67
6.85	0	0	2.89906	49.0657	45.9368	2.96857	0	30	3.1108	2.25787	100002	100001	2650.58
6.9	0	0	3.01845	49.0298	45.869	3.04223	0	30	3.24213	2.35338	100002	100001	2903.54
6.95	0	0	3.14267	48.9924	45.7985	3.11888	0	30	3.37877	2.45276	100002	100001	3180.63
7	0	0	3.27192	48.9534	45.7251	3.19862	0	30	3.52094	2.55615	100002	100001	3484.17
7.05	0	0	3.40638	48.9129	45.6489	3.28158	0	30	3.66885	2.66372	100002	100001	3816.68
7.1	0	0	3.54625	48.8708	45.5696	3.36789	0	30	3.82271	2.77562	100002	100001	4180.93
7.15	0	0	3.69176	48.8269	45.4872	3.45767	0	30	3.98277	2.89202	100002	100001	4579.94
7.2	0	0	3.84311	48.7813	45.4016	3.55105	0	30	4.14925	3.0131	100002	100001	5017.03
7.25	0	0	4.00052	48.7338	45.3126	3.64817	0	30	4.32241	3.13904	100002	100001	5495.83
7.3	0	0	4.16424	48.6844	45.2202	3.74918	0	30	4.50249	3.27001	100002	100001	6020.32
7.35	0	0	4.33449	48.633	45.1241	3.85423	0	30	4.68977	3.40621	100002	100001	6594.86
7.4	0	0	4.51152	48.5796	45.0244	3.96346	0	30	4.88451	3.54783	100002	100001	7224.22
7.45	0	0	4.6956	48.524	44.9207	4.07703	0	30	5.08699	3.69509	100002	100001	7913.66
7.5	0	0	4.88697	48.4662	44.8131	4.19511	0	30	5.2975	3.8482	100002	100001	8668.88
7.55	0	0	5.08593	48.4061	44.7013	4.31787	0	30	5.51635	4.00736	100002	100001	9496.19
7.6	0	0	5.29273	48.3436	44.5852	4.44547	0	30	5.74384	4.1728	100002	100001	10402.4
7.65	0	0	5.50769	48.2786	44.4647	4.57809	0	30	5.98029	4.34477	100002	100001	11395.2
7.7	0	0	5.73109	48.211	44.3396	4.71593	0	30	6.22603	4.52349	100002	100001	12482.7
7.75	0	0	5.96324	48.1408	44.2098	4.85917	0	30	6.4814	4.70921	100002	100001	13673.9
7.8	0	0	6.20446	48.0678	44.0751	5.008	0	30	6.74674	4.90219	100002	100001	14978.9
7.85	0	0	6.45508	47.9919	43.9354	5.16263	0	30	7.02242	5.10268	100002	100001	16408.4
7.9	0	0	6.71542	47.913	43.7904	5.32327	0	30	7.3088	5.31096	100002	100001	17974.3
7.95	0	0	6.98585	47.8311	43.6401	5.49012	0	30	7.60627	5.5273	100002	100001	19689.6
8	0	0	7.26671	47.7459	43.4842	5.66341	0	30	7.91521	5.75198	100002	100001	21568.7
8.05	0	0	7.55836	47.6575	43.3225	5.84336	0	30	8.23603	5.9853	100002	100001	23627
8.1	0	0	7.86118	47.5656	43.155	6.0302	0	30	8.56913	6.22756	100002	100001	25881.8
8.15	0	0	8.17556	47.4701	42.9814	6.22417	0	30	8.91495	6.47906	100002	100001	28351.8
8.2	0	0	8.50188	47.371	42.8015	6.42551	0	30	9.2739	6.74012	100002	100001	31057.5
8.25	0	0	8.84056	47.2681	42.6151	6.63447	0	30	9.64644	7.01106	100002	100001	34021.5
8.3	0	0	9.19199	47.1612	42.4222	6.85131	0	30	10.033	7.29221	100002	100001	37268.3
8.35	0	0	9.55661	47.0502	42.2224	7.07628	0	30	10.4341	7.58391	100002	100001	40824.9
8.4	0	0	9.93484	46.9351	42.0155	7.30965	0	30	10.8502	7.88649	100002	100001	44721
8.45	0	0	10.3271	46.8156	41.8015	7.55169	0	30	11.2817	8.20032	100002	100001	48988.8
8.5	0	0	10.7339	46.6916	41.5801	7.80268	0	30	11.7291	8.52575	100002	100001	53664
8.55	0	0	11.1557	46.5629	41.3512	8.06289	0	30	12.1931	8.86314	100002	100001	58785.3
8.6	0	0	11.5928	46.4295	41.1144	8.33262	0	30	12.6739	9.21287	100002	100001	64395.4
8.65	0	0	12.0459	46.2911	40.8697	8.61215	0	30	13.1723	9.57532	100002	100001	70540.9
8.7	0	0	12.5153	46.1476	40.6168	8.90179	0	30	13.6887	9.95086	100002	100001	77272.9
8.75	0	0	13.0016	45.9988	40.3556	9.20182	0	30	14.2236	10.3399	100002	100001	84647.3
8.8	0	0	13.5052	45.8446	40.0859	9.51256	0	30	14.7775	10.7428	100002	100001	92725.5
8.85	0	0	14.0267	45.6847	39.8075	9.83431	0	30	15.3512	11.16	100002	100001	100001
8.9	0	0	14.5665	45.5192	39.5203	10.1674	0	30	15.945	11.5918	100002	100001	100001
8.95	0	0	15.1251	45.3477	39.224	10.5121	0	30	16.5595	12.0387	100002	100001	100001
9	0	0	15.7031	45.1701	38.9185	10.8687	0	30	17.1953	12.5011	100002	100001	100001
9.05	0	0	16.301	44.9862	38.6037	11.2375	0	30	17.8529	12.9794	100002	100001	100001
9.1	0	0	16.9191	44.7959	38.2794	11.619	0	30	18.5329	13.4739	100002	100001	100001
9.15	0	0	17.5582	44.5989	37.9454	12.0132	0	30	19.2358	13.9852	100002	100001	100001
9.2	0	0	18.2186	44.3951	37.6017	12.4207	0	30	19.9623	14.5135	100002	100001	100001
9.25	0	0	18.9009	44.1844	37.2481	12.8417	0	30	20.7128	15.0593	100002	100001	100001
9.3	0	0	19.6055	43.9665	36.8846	13.2764	0	30	21.4879	15.623	100002	100001	100001
9.35	0	0	20.333	43.7413	36.5109	13.7253	0	30	22.2881	16.205	100002	100001	100001
9.4	0	0	21.0838	43.5086	36.1271	14.1886	0	30	23.114	16.8057	100002	100001	100001
9.45	0	0	21.8584	43.2682	35.733	14.6665	0	30	23.9661	17.4254	100002	100001	100001
9.5	0	0	22.6573	43.0199	35.3287	15.1594	0	30	24.8449	18.0645	100002	100001	100001
9.55	0	0	23.4809	42.7637	34.9141	15.6675	0	30	25.7508	18.7233	100002	100001	100001
9.6	0	0	24.3295	42.4992	34.4892	16.1912	0	30	26.6843	19.4022	100002	100001	100001
9.65	0	0	25.2037	42.2264	34.0541	16.7305	0	30	27.6459	20.1016	100002	100001	100001
9.7	0	0	26.1038	41.9451	33.6087	17.2859	0	30	28.636	20.8217	100002	100001	100001
9.75	0	0	27.0302	41.6552	33.1531	17.8575	0	30	29.6551	21.5628	100002	100001	100001
9.8	0	0	27.9832	41.3565	32.6874	18.4455	0	30	30.7033	22.3252	100002	100001	100001
9.85	0	0	28.9631	41.0489	32.2118	19.0501	0	30	31.7812	23.1091	100002	100001	100001
9.9	0	0	29.9701	40.7322	31.7264	19.6714	0	30	32.889	23.9147	100002	100001	100001
9.95	0	0	31.0046	40.4063	31.2312	20.3097	0	30	34.0269	24.7423	100002	100001	100001
10	0	0	32.0667	40.0712	30.7267	20.965	0	30	35.1952	25.592	100002	100001	100001
10.05	0	0	33.1566	39.7267	30.2129	21.6375	0	30	36.3941	26.4639	100002	100001	100001
10.1	0	0	34.2744	39.3727	29.6901	22.3271	0	30	37.6236	27.3581	100002	100001	100001
10.15	0	0	35.4201	39.0091	29.1587	23.0341	0	30	38.8839	28.2747	100002	100001	100001
10.2	0	0	36.5938	38.636	28.6189	23.7582	0	30	40.175	29.2137	100002	100001	100001
10.25	0	0	37.7955	38.2532	28.0711	24.4997	0	30	41.4969	30.175	100002	100001	100001
10.3	0	0	39.0251	37.8608	27.5158	25.2583	0	30	42.8495	31.1587	100002	100001	100001
10.35	0	0	40.2824	37.4587	26.9533	26.0341	0	30	44.2325	32.1646	100002	100001	100001
10.4	0	0	41.5673	37.0468	26.384	26.8269	0	30	45.6459	33.1925	100002	100001	100001
10.45	0	0	42.8795	36.6254	25.8086	27.6365	0	30	47.0893	34.2422	100002	100001	100001
10.5	0	0	44.2187	36.1943	25.2275	28.4628	0	30	48.5624	35.3136	100002	100001	100001
10.55	0	0	45.5844	35.7537	24.6412	29.3054	0	30	50.0647	36.4061	100002	100001	100001
10.6	0	0	46.9762	35.3036	24.0505	30.1642	0	30	51.5957	37.5196	100002	100001	100001
10.65	0	0	48.3936	34.8442	23.4558	31.0387	0	30	53.1548	38.6535	100002	100001	100001
10.7	0	0	49.8359	34.3756	22.8578	31.9286	0	30	54.7414	39.8074	100002	100001	100001
10.75	0	0	51.3026	33.8979	22.2572	32.8335	0	30	56.3546	40.9807	100002	100001	100001
10.8	0	0	52.7927	33.4114	21.6547	33.7529	0	30	57.9938	42.1728	100002	100001	100001
10.85	0	0	54.3055	32.9162	21.0511	34.6863	0	30	59.6579	43.383	100002	100001	100001
10.9	0	0	55.8401	32.4127	20.447	35.6332	0	30	61.3459	44.6107	100002	100001	100001
10.95	0	0	57.3955	31.901	19.8431	36.5928	0	30	63.0568	45.855	100002	100001	100001
11	0	0	58.9706	31.3815	19.2403	37.5647	0	30	64.7894	47.1151	100002	100001	100001
11.05	0	0	60.5643	30.8544	18.6394	38.548	0	30	66.5425	48.39	100002	100001	100001
11.1	0	0	62.1754	30.3202	18.041	39.5421	0	30	68.3147	49.6789	100002	100001	100001
11.15	0	0	63.8026	29.7792	17.446	40.5461	0	30	70.1047	50.9807	100002	100001	100001
11.2	0	0	65.4446	29.2319	16.8552	41.5592	0	30	71.9109	52.2943	100002	100001	100001
11.25	0	0	67.1	28.6785	16.2693	42.5805	0	30	73.7318	53.6186	100002	100001	100001
11.3	0	0	68.7673	28.1196	15.689	43.6092	0	30	75.5658	54.9524	100002	100001	100001
11.35	0	0	70.4449	27.5558	15.1152	44.6444	0	30	77.4112	56.2945	100002	100001	100001
11.4	0	0	72.1313	26.9873	14.5485	45.6849	0	30	79.2663	57.6437	100002	100001	100001
11.45	0	0	73.8249	26.4149	13.9896	46.7298	0	30	81.1293	58.9986	100002	100001	100001
11.5	0	0	75.524	25.8391	13.4393	47.7782	0	30	82.9983	60.3578	100002	100001	100001
11.55	0	0	77.2269	25.2603	12.8982	48.8288	0	30	84.8714	61.7201	100002	100001	100001
11.6	0	0	78.9317	24.6793	12.3668	49.8807	0	30	86.7468	63.084	100002	100001	100001
11.65	0	0	80.6369	24.0966	11.8458	50.9328	0	30	88.6224	64.4481	100002	100001	100001
11.7	0	0	82.3405	23.5127	11.3357	51.9839	0	30	90.4963	65.811	100002	100001	100001
11.75	0	0	84.0407	22.9284	10.8371	53.033	0	30	92.3666	67.1712	100002	100001	100001
11.8	0	0	85.7358	22.3443	10.3503	54.0788	0	30	94.2312	68.5273	100002	100001	100001
11.85	0	0	87.4239	21.761	9.87583	55.1204	0	30	96.0882	69.8778	100002	100001	100001
11.9	0	0	89.1033	21.1791	9.414	56.1566	0	30	97.9355	71.2213	100002	100001	100001
11.95	0	0	90.7722	20.5993	8.96515	57.1863	0	30	99.7713	72.5564	100002	100001	100001
12	0	0	92.4288	20.0222	8.52955	58.2084	0	30	101.594	73.8817	100002	100001	100001
12.05	0	0	94.0714	19.4485	8.10743	59.2219	0	30	103.4	75.1957	100002	100001	100001
12.1	0	0	95.6983	18.8788	7.69894	60.2257	0	30	105.19	76.4972	100002	100001	100001
12.15	0	0	97.3079	18.3137	7.30423	61.2188	0	30	106.96	77.7849	100002	100001	100001
12.2	0	0	98.8986	17.7538	6.92337	62.2003	0	30	108.71	79.0575	100002	100001	100001
12.25	0	0	100.469	17.1997	6.55639	63.1691	0	30	110.438	80.3137	100002	100001	100001
12.3	0	0	102.017	16.652	6.20327	64.1245	0	30	112.141	81.5524	100002	100001	100001
12.35	0	0	103.542	16.1112	5.86396	65.0654	0	30	113.818	82.7725	100002	100001	100001
12.4	0	0	105.043	15.5778	5.53838	65.9913	0	30	115.469	83.9729	100002	100001	100001
12.45	0	0	106.518	15.0524	5.22637	66.9012	0	30	117.091	85.1527	100002	100001	100001
12.5	0	0	107.965	14.5354	4.92779	67.7945	0	30	118.684	86.3109	100002	100001	100001
12.55	0	0	109.385	14.0272	4.64242	68.6705	0	30	120.245	87.4467	100002	100001	100001
12.6	0	0	110.776	13.5283	4.37002	69.5286	0	30	121.775	88.5594	100002	100001	100001
12.65	0	0	112.137	13.039	4.11034	70.3684	0	30	123.272	89.6482	100002	100001	100001
12.7	0	0	113.467	12.5597	3.86309	71.1892	0	30	124.736	90.7125	100002	100001	100001
12.75	0	0	114.766	12.0907	3.62795	71.9908	0	30	126.165	91.7518	100002	100001	100001
12.8	0	0	116.034	11.6323	3.4046	72.7727	0	30	127.559	92.7656	100002	100001	100001
12.85	0	0	117.269	11.1847	3.1927	73.5346	0	30	128.917	93.7535	100002	100001	100001
12.9	0	0	118.471	10.7481	2.99187	74.2763	0	30	130.24	94.7152	100002	100001	100001
12.95	0	0	119.64	10.3227	2.80177	74.9977	0	30	131.526	95.6505	100002	100001	100001
13	0	0	120.776	9.90863	2.62199	75.6985	0	30	132.775	96.5592	100002	100001	100001
13.05	0	0	121.878	9.50601	2.45217	76.3788	0	30	133.988	97.4412	100002	100001	100001
13.1	0	0	122.947	9.11489	2.29191	77.0384	0	30	135.164	98.2965	100002	100001	100001
13.15	0	0	123.983	8.73533	2.14082	77.6775	0	30	136.303	99.1252	100002	100001	100001
13.2	0	0	124.986	8.36732	1.99852	78.2961	0	30	137.406	99.9273	100002	100001	100001
13.25	0	0	125.955	8.01085	1.86462	78.8943	0	30	138.473	100.703	100002	100001	100001
13.3	0	0	126.892	7.66588	1.73874	79.4724	0	30	139.503	101.452	100002	100001	100001
13.35	0	0	127.797	7.33232	1.6205	80.0304	0	30	140.498	102.176	100002	100001	100001
13.4	0	0	128.669	7.01008	1.50952	80.5687	0	30	141.458	102.874	100002	100001	100001
13.45	0	0	129.51	6.69905	1.40546	81.0876	0	30	142.383	103.547	100002	100001	100001
13.5	0	0	130.32	6.39906	1.30794	81.5873	0	30	143.274	104.195	100002	100001	100001
13.55	0	0	131.1	6.10997	1.21664	82.0683	0	30	144.131	104.818	100002	100001	100001
13.6	0	0	131.849	5.83159	1.13122	82.5307	0	30	144.956	105.418	100002	100001	100001
13.65	0	0	132.569	5.56373	1.05135	82.9752	0	30	145.748	105.994	100002	100001	100001
13.7	0	0	133.261	5.30618	0.976718	83.402	0	30	146.509	106.548	100002	100001	100001
13.75	0	0	133.925	5.05872	0.907037	83.8116	0	30	147.239	107.079	100002	100001	100001
13.8	0	0	134.562	4.8211	0.842013	84.2044	0	30	147.94	107.588	100002	100001	100001
13.85	0	0	135.172	4.5931	0.781371	84.5809	0	30	148.611	108.076	100002	100001	100001
13.9	0	0	135.756	4.37446	0.724849	84.9416	0	30	149.254	108.544	100002	100001	100001
13.95	0	0	136.316	4.16492	0.672196	85.2868	0	30	149.869	108.991	100002	100001	100001
14	0	0	136.851	3.96423	0.623173	85.6172	0	30	150.458	109.42	100002	100001	100001
14.05	0	0	137.363	3.77212	0.577553	85.9331	0	30	151.022	109.829	100002	100001	100001
14.1	0	0	137.853	3.58833	0.535119	86.235	0	30	151.56	110.221	100002	100001	100001
14.15	0	0	138.32	3.41258	0.495667	86.5234	0	30	152.074	110.595	100002	100001	100001
14.2	0	0	138.767	3.24461	0.459005	86.7988	0	30	152.565	110.952	100002	100001	100001
14.25	0	0	139.193	3.08416	0.424949	87.0617	0	30	153.034	111.293	100002	100001	100001
14.3	0	0	139.599	2.93095	0.393327	87.3125	0	30	153.481	111.618	100002	100001	100001
14.35	0	0	139.987	2.78473	0.363975	87.5516	0	30	153.907	111.928	100002	100001	100001
14.4	0	0	140.356	2.64524	0.336741	87.7795	0	30	154.313	112.223	100002	100001	100001
14.45	0	0	140.708	2.51222	0.311482	87.9967	0	30	154.701	112.505	100002	100001	100001
14.5	0	0	141.043	2.38542	0.288061	88.2035	0	30	155.069	112.773	100002	100001	100001
14.55	0	0	141.362	2.2646	0.266351	88.4005	0	30	155.421	113.029	100002	100001	100001
14.6	0	0	141.666	2.14952	0.246234	88.588	0	30	155.755	113.272	100002	100001	100001
14.65	0	0	141.955	2.03993	0.227598	88.7664	0	30	156.073	113.503	100002	100001	100001
14.7	0	0	142.23	1.93562	0.210339	88.936	0	30	156.375	113.723	100002	100001	100001
14.75	0	0	142.492	1.83636	0.194359	89.0974	0	30	156.663	113.932	100002	100001	100001
14.8	0	0	142.741	1.74193	0.179568	89.2508	0	30	156.937	114.131	100002	100001	100001
14.85	0	0	142.977	1.65212	0.165879	89.3966	0	30	157.196	114.32	100002	100001	100001
14.9	0	0	143.201	1.56674	0.153214	89.5351	0	30	157.443	114.5	100002	100001	100001
14.95	0	0	143.415	1.48557	0.141498	89.6668	0	30	157.678	114.67	100002	100001	100001
15	0	0	143.617	1.40845	0.130663	89.7917	0	30	157.901	114.832	100002	100001	100001
15.05	0	0	143.81	1.33517	0.120644	89.9104	0	30	158.112	114.986	100002	100001	100001
15.1	0	0	143.992	1.26556	0.111382	90.0231	0	30	158.313	115.132	100002	100001	100001
15.15	0	0	144.166	1.19946	0.10282	90.13	0	30	158.504	115.271	100002	100001	100001
15.2	0	0	144.33	1.1367	0.0949075	90.2315	0	30	158.685	115.403	100002	100001	100001
15.25	0	0	144.486	1.07712	0.0875959	90.3278	0	30	158.857	115.528	100002	100001	100001
15.3	0	0	144.634	1.02057	0.0808407	90.4192	0	30	159.019	115.646	100002	100001	100001
15.35	0	0	144.775	0.966911	0.0746003	90.5058	0	30	159.174	115.758	100002	100001	100001
15.4	0	0	144.908	0.915997	0.0688364	90.588	0	30	159.32	115.865	100002	100001	100001
15.45	0	0	145.034	0.867698	0.0635131	90.6659	0	30	159.459	115.966	100002	100001	100001
15.5	0	0	145.154	0.821885	0.0585975	90.7398	0	30	159.591	116.062	100002	100001	100001
15.55	0	0	145.267	0.778438	0.0540588	90.8098	0	30	159.716	116.152	100002	100001	100001
15.6	0	0	145.375	0.737239	0.0498686	90.8762	0	30	159.834	116.239	100002	100001	100001
15.65	0	0	145.477	0.698176	0.0460004	90.9391	0	30	159.946	116.32	100002	100001	100001
15.7	0	0	145.573	0.661145	0.0424299	90.9987	0	30	160.053	116.397	100002	100001	100001
15.75	0	0	145.665	0.626043	0.0391345	91.0552	0	30	160.153	116.471	100002	100001	100001
15.8	0	0	145.752	0.592773	0.0360932	91.1087	0	30	160.249	116.54	100002	100001	100001
15.85	0	0	145.834	0.561242	0.0332867	91.1594	0	30	160.339	116.606	100002	100001	100001
15.9	0	0	145.912	0.531364	0.030697	91.2074	0	30	160.425	116.668	100002	100001	100001
15.95	0	0	145.986	0.503053	0.0283076	91.2529	0	30	160.506	116.727	100002	100001	100001
16	0	0	146.055	0.47623	0.0261032	91.296	0	30	160.583	116.783	100002	100001	100001
16.05	0	0	146.121	0.45082	0.0240695	91.3368	0	30	160.655	116.836	100002	100001	100001
16.1	0	0	146.184	0.426748	0.0221934	91.3754	0	30	160.724	116.886	100002	100001	100001
16.15	0	0	146.243	0.403947	0.0204629	91.412	0	30	160.79	116.933	100002	100001	100001
16.2	0	0	146.3	0.382352	0.0188667	91.4467	0	30	160.851	116.978	100002	100001	100001
16.25	0	0	146.353	0.361898	0.0173945	91.4795	0	30	160.91	117.021	100002	100001	100001
16.3	0	0	146.403	0.342529	0.0160367	91.5105	0	30	160.965	117.061	100002	100001	100001
16.35	0	0	146.451	0.324186	0.0147845	91.5399	0	30	161.018	117.099	100002	100001	100001
16.4	0	0	146.496	0.306817	0.0136297	91.5678	0	30	161.067	117.135	100002	100001	100001
16.45	0	0	146.538	0.290372	0.0125648	91.5941	0	30	161.114	117.169	100002	100001	100001
16.5	0	0	146.579	0.2748	0.0115828	91.619	0	30	161.159	117.202	100002	100001	100001
16.55	0	0	146.617	0.260058	0.0106773	91.6426	0	30	161.201	117.232	100002	100001	100001
16.6	0	0	146.653	0.246101	0.00984237	91.665	0	30	161.241	117.261	100002	100001	100001
16.65	0	0	146.688	0.232888	0.00907256	91.6861	0	30	161.278	117.289	100002	100001	100001
16.7	0	0	146.72	0.22038	0.00836281	91.7061	0	30	161.314	117.315	100002	100001	100001
16.75	0	0	146.751	0.20854	0.00770845	91.7251	0	30	161.348	117.339	100002	100001	100001
16.8	0	0	146.78	0.197333	0.00710518	91.743	0	30	161.38	117.362	100002	100001	100001
16.85	0	0	146.807	0.186724	0.00654902	91.76	0	30	161.41	117.384	100002	100001	100001
16.9	0	0	146.833	0.176683	0.0060363	91.776	0	30	161.439	117.405	100002	100001	100001
16.95	0	0	146.858	0.16718	0.00556364	91.7912	0	30	161.466	117.425	100002	100001	100001
17	0	0	146.881	0.158185	0.00512792	91.8056	0	30	161.491	117.444	100002	100001	100001
17.05	0	0	146.903	0.149672	0.00472626	91.8192	0	30	161.515	117.461	100002	100001	100001
17.1	0	0	146.924	0.141616	0.00435602	91.8321	0	30	161.538	117.478	100002	100001	100001
17.15	0	0	146.944	0.133991	0.00401473	91.8442	0	30	161.56	117.494	100002	100001	100001
17.2	0	0	146.963	0.126776	0.00370015	91.8558	0	30	161.581	117.509	100002	100001	100001
17.25	0	0	146.98	0.119948	0.00341017	91.8667	0	30	161.6	117.523	100002	100001	100001
17.3	0	0	146.997	0.113486	0.0031429	91.877	0	30	161.618	117.536	100002	100001	100001
17.35	0	0	147.013	0.107371	0.00289654	91.8867	0	30	161.636	117.549	100002	100001	100001
17.4	0	0	147.028	0.101585	0.00266947	91.896	0	30	161.652	117.561	100002	100001	100001
17.45	0	0	147.042	0.0961102	0.00246018	91.9047	0	30	161.668	117.572	100002	100001	100001
17.5	0	0	147.055	0.0909294	0.00226729	91.913	0	30	161.683	117.583	100002	100001	100001
17.55	0	0	147.068	0.0860272	0.0020895	91.9208	0	30	161.697	117.593	100002	100001	100001
17.6	0	0	147.08	0.0813887	0.00192564	91.9282	0	30	161.71	117.603	100002	100001	100001
17.65	0	0	147.091	0.0769998	0.00177462	91.9352	0	30	161.722	117.612	100002	100001	100001
17.7	0	0	147.102	0.072847	0.00163543	91.9418	0	30	161.734	117.62	100002	100001	100001
17.75	0	0	147.112	0.0689178	0.00150715	91.9481	0	30	161.745	117.628	100002	100001	100001
17.8	0	0	147.122	0.0652001	0.00138893	91.954	0	30	161.756	117.636	100002	100001	100001
17.85	0	0	147.131	0.0616826	0.00127997	91.9596	0	30	161.766	117.643	100002	100001	100001
17.9	0	0	147.139	0.0583546	0.00117955	91.9649	0	30	161.775	117.65	100002	100001	100001
17.95	0	0	147.148	0.0552058	0.00108701	91.9699	0	30	161.784	117.657	100002	100001	100001
18	0	0	147.155	0.0522267	0.00100172	91.9747	0	30	161.793	117.663	100002	100001	100001
18.05	0	0	147.163	0.0494082	0.000923125	91.9792	0	30	161.801	117.669	100002	100001	100001
18.1	0	0	147.169	0.0467415	0.000850689	91.9834	0	30	161.808	117.674	100002	100001	100001
18.15	0	0	147.176	0.0442186	0.000783935	91.9874	0	30	161.815	117.679	100002	100001	100001
18.2	0	0	147.182	0.0418317	0.000722416	91.9912	0	30	161.822	117.684	100002	100001	100001
18.25	0	0	147.188	0.0395735	0.000665722	91.9948	0	30	161.829	117.689	100002	100001	100001
18.3	0	0	147.193	0.0374371	0.000613476	91.9982	0	30	161.835	117.693	100002	100001	100001
18.35	0	0	147.199	0.0354159	0.000565328	92.0014	0	30	161.84	117.698	100002	100001	100001
18.4	0	0	147.204	0.0335038	0.000520958	92.0045	0	30	161.846	117.702	100002	100001	100001
18.45	0	0	147.208	0.0316947	0.000480069	92.0074	0	30	161.851	117.705	100002	100001	100001
18.5	0	0	147.213	0.0299833	0.000442388	92.0101	0	30	161.856	117.709	100002	100001	100001
18.55	0	0	147.217	0.0283642	0.000407664	92.0127	0	30	161.86	117.712	100002	100001	100001
18.6	0	0	147.221	0.0268325	0.000375664	92.0151	0	30	161.865	117.715	100002	100001	100001
18.65	0	0	147.225	0.0253834	0.000346176	92.0174	0	30	161.869	117.718	100002	100001	100001
18.7	0	0	147.228	0.0240126	0.000319002	92.0196	0	30	161.873	117.721	100002	100001	100001
18.75	0	0	147.231	0.0227157	0.00029396	92.0216	0	30	161.876	117.724	100002	100001	100001
18.8	0	0	147.235	0.0214888	0.000270883	92.0236	0	30	161.88	117.726	100002	100001	100001
18.85	0	0	147.238	0.0203281	0.000249618	92.0254	0	30	161.883	117.729	100002	100001	100001
18.9	0	0	147.24	0.0192301	0.000230022	92.0272	0	30	161.886	117.731	100002	100001	100001
18.95	0	0	147.243	0.0181914	0.000211963	92.0288	0	30	161.889	117.733	100002	100001	100001
19	0	0	147.246	0.0172088	0.000195323	92.0304	0	30	161.892	117.735	100002	100001	100001
19.05	0	0	147.248	0.0162792	0.000179988	92.0319	0	30	161.895	117.737	100002	100001	100001
19.1	0	0	147.25	0.0153998	0.000165857	92.0333	0	30	161.897	117.739	100002	100001	100001
19.15	0	0	147.252	0.0145679	0.000152835	92.0346	0	30	161.9	117.741	100002	100001	100001
19.2	0	0	147.254	0.0137809	0.000140836	92.0359	0	30	161.902	117.742	100002	100001	100001
19.25	0	0	147.256	0.0130364	0.000129778	92.037	0	30	161.904	117.744	100002	100001	100001
19.3	0	0	147.258	0.0123321	0.000119589	92.0382	0	30	161.906	117.745	100002	100001	100001
19.35	0	0	147.26	0.0116659	0.000110199	92.0392	0	30	161.908	117.747	100002	100001	100001
19.4	0	0	147.262	0.0110356	0.000101547	92.0402	0	30	161.91	117.748	100002	100001	100001
19.45	0	0	147.263	0.0104394	9.35737e-05	92.0412	0	30	161.911	117.749	100002	100001	100001
19.5	0	0	147.265	0.0098754	8.62265e-05	92.0421	0	30	161.913	117.75	100002	100001	100001
19.55	0	0	147.266	0.00934184	7.94561e-05	92.0429	0	30	161.914	117.751	100002	100001	100001
19.6	0	0	147.267	0.00883711	7.32173e-05	92.0437	0	30	161.916	117.752	100002	100001	100001
19.65	0	0	147.268	0.00835964	6.74682e-05	92.0445	0	30	161.917	117.753	100002	100001	100001
19.7	0	0	147.27	0.00790796	6.21706e-05	92.0452	0	30	161.918	117.754	100002	100001	100001
19.75	0	0	147.271	0.00748068	5.72889e-05	92.0459	0	30	161.92	117.755	100002	100001	100001
19.8	0	0	147.272	0.00707648	5.27905e-05	92.0465	0	30	161.921	117.756	100002	100001	100001
19.85	0	0	147.273	0.00669412	4.86452e-05	92.0471	0	30	161.922	117.757	100002	100001	100001
19.9	0	0	147.274	0.00633242	4.48255e-05	92.0477	0	30	161.923	117.758	100002	100001	100001
19.95	0	0	147.275	0.00599025	4.13056e-05	92.0482	0	30	161.924	117.758	100002	100001	100001
20	0	0	147.275	0.00566658	3.80622e-05	92.0488	0	30	161.925	117.759	100002	100001	100001
20.05	0	0	147.276	0.00536038	3.50734e-05	92.0492	0	30	161.926	117.76	100002	100001	100001
20.1	0	0	147.277	0.00507073	3.23193e-05	92.0497	0	30	161.926	117.76	100002	100001	100001
20.15	0	0	147.278	0.00479673	2.97814e-05	92.0501	0	30	161.927	117.761	100002	100001	100001
20.2	0	0	147.278	0.00453754	2.74428e-05	92.0505	0	30	161.928	117.761	100002	100001	100001
20.25	0	0	147.279	0.00429235	2.52879e-05	92.0509	0	30	161.929	117.762	100002	100001	100001
20.3	0	0	147.28	0.0040604	2.33021e-05	92.0513	0	30	161.929	117.762	100002	100001	100001
20.35	0	0	147.28	0.00384099	2.14723e-05	92.0517	0	30	161.93	117.763	100002	100001	100001
20.4	0	0	147.281	0.00363343	1.97861e-05	92.052	0	30	161.93	117.763	100002	100001	100001
20.45	0	0	147.281	0.00343709	1.82324e-05	92.0523	0	30	161.931	117.764	100002	100001	100001
20.5	0	0	147.282	0.00325136	1.68007e-05	92.0526	0	30	161.932	117.764	100002	100001	100001
20.55	0	0	147.282	0.00307566	1.54814e-05	92.0529	0	30	161.932	117.764	100002	100001	100001
20.6	0	0	147.282	0.00290946	1.42657e-05	92.0531	0	30	161.933	117.765	100002	100001	100001
20.65	0	0	147.283	0.00275223	1.31454e-05	92.0534	0	30	161.933	117.765	100002	100001	100001
20.7	0	0	147.283	0.00260351	1.21131e-05	92.0536	0	30	161.933	117.765	100002	100001	100001
20.75	0	0	147.284	0.00246282	1.11619e-05	92.0538	0	30	161.934	117.766	100002	100001	100001
20.8	0	0	147.284	0.00232973	1.02854e-05	92.0541	0	30	161.934	117.766	100002	100001	100001
20.85	0	0	147.284	0.00220383	9.47769e-06	92.0543	0	30	161.935	117.766	100002	100001	100001
20.9	0	0	147.285	0.00208473	8.73342e-06	92.0544	0	30	161.935	117.766	100002	100001	100001
20.95	0	0	147.285	0.00197208	8.0476e-06	92.0546	0	30	161.935	117.767	100002	100001	100001
21	0	0	147.285	0.00186551	7.41563e-06	92.0548	0	30	161.935	117.767	100002	100001	100001
21.05	0	0	147.285	0.00176469	6.83329e-06	92.0549	0	30	161.936	117.767	100002	100001	100001
21.1	0	0	147.286	0.00166933	6.29668e-06	92.0551	0	30	161.936	117.767	100002	100001	100001
21.15	0	0	147.286	0.00157912	5.8022e-06	92.0552	0	30	161.936	117.767	100002	100001	100001
21.2	0	0	147.286	0.00149378	5.34656e-06	92.0554	0	30	161.937	117.768	100002	100001	100001
21.25	0	0	147.286	0.00141306	4.9267e-06	92.0555	0	30	161.937	117.768	100002	100001	100001
21.3	0	0	147.287	0.00133669	4.53981e-06	92.0556	0	30	161.937	117.768	100002	100001	100001
21.35	0	0	147.287	0.00126446	4.1833e-06	92.0557	0	30	161.937	117.768	100002	100001	100001
21.4	0	0	147.287	0.00119612	3.85479e-06	92.0559	0	30	161.937	117.768	100002	100001	100001
21.45	0	0	147.287	0.00113148	3.55207e-06	92.056	0	30	161.938	117.768	100002	100001	100001
21.5	0	0	147.287	0.00107034	3.27313e-06	92.0561	0	30	161.938	117.768	100002	100001	100001
21.55	0	0	147.287	0.0010125	3.01609e-06	92.0561	0	30	161.938	117.768	100002	100001	100001
21.6	0	0	147.287	0.000957779	2.77923e-06	92.0562	0	30	161.938	117.769	100002	100001	100001
21.65	0	0	147.288	0.000906019	2.56098e-06	92.0563	0	30	161.938	117.769	100002	100001	100001
21.7	0	0	147.288	0.000857056	2.35987e-06	92.0564	0	30	161.938	117.769	100002	100001	100001
21.75	0	0	147.288	0.00081074	2.17455e-06	92.0565	0	30	161.938	117.769	100002	100001	100001
21.8	0	0	147.288	0.000766926	2.00378e-06	92.0565	0	30	161.939	117.769	100002	100001	100001
21.85	0	0	147.288	0.00072548	1.84642e-06	92.0566	0	30	161.939	117.769	100002	100001	100001
21.9	0	0	147.288	0.000686274	1.70142e-06	92.0567	0	30	161.939	117.769	100002	100001	100001
21.95	0	0	147.288	0.000649186	1.56781e-06	92.0567	0	30	161.939	117.769	100002	100001	100001
22	0	0	147.288	0.000614103	1.44469e-06	92.0568	0	30	161.939	117.769	100002	100001	100001
22.05	0	0	147.288	0.000580916	1.33124e-06	92.0568	0	30	161.939	117.769	100002	100001	100001
22.1	0	0	147.289	0.000549522	1.22669e-06	92.0569	0	30	161.939	117.769	100002	100001	100001
22.15	0	0	147.289	0.000519824	1.13036e-06	92.0569	0	30	161.939	117.77	100002	100001	100001
22.2	0	0	147.289	0.000491732	1.04159e-06	92.057	0	30	161.939	117.77	100002	100001	100001
22.25	0	0	147.289	0.000465158	9.59795e-07	92.057	0	30	161.939	117.77	100002	100001	100001
22.3	0	0	147.289	0.00044002	8.84422e-07	92.0571	0	30	161.94	117.77	100002	100001	100001
22.35	0	0	147.289	0.00041624	8.14967e-07	92.0571	0	30	161.94	117.77	100002	100001	100001
22.4	0	0	147.289	0.000393745	7.50968e-07	92.0571	0	30	161.94	117.77	100002	100001	100001
22.45	0	0	147.289	0.000372467	6.91994e-07	92.0572	0	30	161.94	117.77	100002	100001	100001
22.5	0	0	147.289	0.000352338	6.37652e-07	92.0572	0	30	161.94	117.77	100002	100001	100001
22.55	0	0	147.289	0.000333297	5.87577e-07	92.0572	0	30	161.94	117.77	100002	100001	100001
22.6	0	0	147.289	0.000315284	5.41435e-07	92.0572	0	30	161.94	117.77	100002	100001	100001
22.65	0	0	147.289	0.000298246	4.98916e-07	92.0573	0	30	161.94	117.77	100002	100001	100001
22.7	0	0	147.289	0.000282128	4.59736e-07	92.0573	0	30	161.94	117.77	100002	100001	100001
22.75	0	0	147.289	0.000266881	4.23633e-07	92.0573	0	30	161.94	117.77	100002	100001	100001
22.8	0	0	147.289	0.000252458	3.90365e-07	92.0573	0	30	161.94	117.77	100002	100001	100001
22.85	0	0	147.289	0.000238815	3.5971e-07	92.0574	0	30	161.94	117.77	100002	100001	100001
22.9	0	0	147.289	0.000225908	3.31462e-07	92.0574	0	30	161.94	117.77	100002	100001	100001
22.95	0	0	147.289	0.0002137	3.05432e-07	92.0574	0	30	161.94	117.77	100002	100001	100001
23	0	0	147.289	0.000202151	2.81446e-07	92.0574	0	30	161.94	117.77	100002	100001	100001
23.05	0	0	147.289	0.000191226	2.59344e-07	92.0574	0	30	161.94	117.77	100002	100001	100001
23.1	0	0	147.289	0.000180892	2.38978e-07	92.0575	0	30	161.94	117.77	100002	100001	100001
23.15	0	0	147.29	0.000171116	2.20211e-07	92.0575	0	30	161.94	117.77	100002	100001	100001
23.2	0	0	147.29	0.000161868	2.02918e-07	92.0575	0	30	161.94	117.77	100002	100001	100001
23.25	0	0	147.29	0.000153121	1.86982e-07	92.0575	0	30	161.94	117.77	100002	100001	100001
23.3	0	0	147.29	0.000144846	1.72299e-07	92.0575	0	30	161.94	117.77	100002	100001	100001
23.35	0	0	147.29	0.000137018	1.58768e-07	92.0575	0	30	161.94	117.77	100002	100001	100001
23.4	0	0	147.29	0.000129613	1.463e-07	92.0575	0	30	161.94	117.77	100002	100001	100001
23.45	0	0	147.29	0.000122608	1.34811e-07	92.0576	0	30	161.94	117.77	100002	100001	100001
23.5	0	0	147.29	0.000115982	1.24224e-07	92.0576	0	30	161.94	117.77	100002	100001	100001
23.55	0	0	147.29	0.000109714	1.14469e-07	92.0576	0	30	161.94	117.77	100002	100001	100001
23.6	0	0	147.29	0.000103785	1.0548e-07	92.0576	0	30	161.94	117.77	100002	100001	100001
23.65	0	0	147.29	9.81763e-05	9.71963e-08	92.0576	0	30	161.94	117.77	100002	100001	100001
23.7	0	0	147.29	9.28706e-05	8.95634e-08	92.0576	0	30	161.941	117.77	100002	100001	100001
23.75	0	0	147.29	8.78516e-05	8.253e-08	92.0576	0	30	161.941	117.77	100002	100001	100001
23.8	0	0	147.29	8.31039e-05	7.60489e-08	92.0576	0	30	161.941	117.77	100002	100001	100001
23.85	0	0	147.29	7.86127e-05	7.00767e-08	92.0576	0	30	161.941	117.77	100002	100001	100001
23.9	0	0	147.29	7.43643e-05	6.45736e-08	92.0576	0	30	161.941	117.77	100002	100001	100001
23.95	0	0	147.29	7.03454e-05	5.95026e-08	92.0576	0	30	161.941	117.77	100002	100001	100001
24	0	0	147.29	6.65438e-05	5.48298e-08	92.0576	0	30	161.941	117.77	100002	100001	100001
24.05	0	0	147.29	6.29476e-05	5.0524e-08	92.0576	0	30	161.941	117.77	100002	100001	100001
24.1	0	0	147.29	5.95457e-05	4.65563e-08	92.0577	0	30	161.941	117.77	100002	100001	100001
24.15	0	0	147.29	5.63277e-05	4.29003e-08	92.0577	0	30	161.941	117.77	100002	100001	100001
24.2	0	0	147.29	5.32836e-05	3.95313e-08	92.0577	0	30	161.941	117.77	100002	100001	100001
24.25	0	0	147.29	5.0404e-05	3.64269e-08	92.0577	0	30	161.941	117.77	100002	100001	100001
24.3	0	0	147.29	4.768e-05	3.35663e-08	92.0577	0	30	161.941	117.77	100002	100001	100001
24.35	0	0	147.29	4.51033e-05	3.09303e-08	92.0577	0	30	161.941	117.77	100002	100001	100001
24.4	0	0	147.29	4.26658e-05	2.85013e-08	92.0577	0	30	161.941	117.77	100002	100001	100001
24.45	0	0	147.29	4.036e-05	2.62631e-08	92.0577	0	30	161.941	117.77	100002	100001	100001
24.5	0	0	147.29	3.81788e-05	2.42007e-08	92.0577	0	30	161.941	117.77	100002	100001	100001
24.55	0	0	147.29	3.61155e-05	2.23002e-08	92.0577	0	30	161.941	117.771	100002	100001	100001
24.6	0	0	147.29	3.41638e-05	2.05489e-08	92.0577	0	30	161.941	117.771	100002	100001	100001
24.65	0	0	147.29	3.23175e-05	1.89352e-08	92.0577	0	30	161.941	117.771	100002	100001	100001
24.7	0	0	147.29	3.05709e-05	1.74482e-08	92.0577	0	30	161.941	117.771	100002	100001	100001
24.75	0	0	147.29	2.89188e-05	1.6078e-08	92.0577	0	30	161.941	117.771	100002	100001	100001
24.8	0	0	147.29	2.73559e-05	1.48154e-08	92.0577	0	30	161.941	117.771	100002	100001	100001
24.85	0	0	147.29	2.58776e-05	1.36519e-08	92.0577	0	30	161.941	117.771	100002	100001	100001
24.9	0	0	147.29	2.44791e-05	1.25798e-08	92.0577	0	30	161.941	117.771	100002	100001	100001
24.95	0	0	147.29	2.31561e-05	1.15919e-08	92.0577	0	30	161.941	117.771	100002	100001	100001
25	0	0	147.29	2.19047e-05	1.06816e-08	92.0577	0	30	161.941	117.771	100002	100001	100001
25.05	0	0	147.29	2.07209e-05	9.84279e-09	92.0577	0	30	161.941	117.771	100002	100001	100001
25.1	0	0	147.29	1.96011e-05	9.06983e-09	92.0577	0	30	161.941	117.771	100002	100001	100001
25.15	0	0	147.29	1.85418e-05	8.35758e-09	92.0577	0	30	161.941	117.771	100002	100001	100001
25.2	0	0	147.29	1.75398e-05	7.70125e-09	92.0577	0	30	161.941	117.771	100002	100001	100001
25.25	0	0	147.29	1.65919e-05	7.09647e-09	92.0577	0	30	161.941	117.771	100002	100001	100001
25.3	0	0	147.29	1.56952e-05	6.53918e-09	92.0577	0	30	161.941	117.771	100002	100001	100001
25.35	0	0	147.29	1.4847e-05	6.02566e-09	92.0577	0	30	161.941	117.771	100002	100001	100001
25.4	0	0	147.29	1.40446e-05	5.55246e-09	92.0577	0	30	161.941	117.771	100002	100001	100001
25.45	0	0	147.29	1.32856e-05	5.11642e-09	92.0577	0	30	161.941	117.771	100002	100001	100001
25.5	0	0	147.29	1.25676e-05	4.71463e-09	92.0577	0	30	161.941	117.771	100002	100001	100001
25.55	0	0	147.29	1.18884e-05	4.34439e-09	92.0577	0	30	161.941	117.771	100002	100001	100001
25.6	0	0	147.29	1.12459e-05	4.00322e-09	92.0577	0	30	161.941	117.771	100002	100001	100001
25.65	0	0	147.29	1.06382e-05	3.68884e-09	92.0577	0	30	161.941	117.771	100002	100001	100001
25.7	0	0	147.29	1.00633e-05	3.39916e-09	92.0577	0	30	161.941	117.771	100002	100001	100001
25.75	0	0	147.29	9.51941e-06	3.13222e-09	92.0577	0	30	161.941	117.771	100002	100001	100001
25.8	0	0	147.29	9.00496e-06	2.88625e-09	92.0577	0	30	161.941	117.771	100002	100001	100001
25.85	0	0	147.29	8.51831e-06	2.65959e-09	92.0577	0	30	161.941	117.771	100002	100001	100001
25.9	0	0	147.29	8.05795e-06	2.45073e-09	92.0577	0	30	161.941	117.771	100002	100001	100001
25.95	0	0	147.29	7.62248e-06	2.25827e-09	92.0577	0	30	161.941	117.771	100002	100001	100001
26	0	0	147.29	7.21054e-06	2.08093e-09	92.0577	0	30	161.941	117.771	100002	100001	100001
26.05	0	0	147.29	6.82086e-06	1.91751e-09	92.0577	0	30	161.941	117.771	100002	100001	100001
26.1	0	0	147.29	6.45224e-06	1.76693e-09	92.0577	0	30	161.941	117.771	100002	100001	100001
26.15	0	0	147.29	6.10355e-06	1.62817e-09	92.0577	0	30	161.941	117.771	100002	100001	100001
26.2	0	0	147.29	5.77369e-06	1.50031e-09	92.0577	0	30	161.941	117.771	100002	100001	100001
26.25	0	0	147.29	5.46167e-06	1.38249e-09	92.0577	0	30	161.941	117.771	100002	100001	100001
26.3	0	0	147.29	5.16651e-06	1.27393e-09	92.0577	0	30	161.941	117.771	100002	100001	100001
26.35	0	0	147.29	4.8873e-06	1.1739e-09	92.0577	0	30	161.941	117.771	100002	100001	100001
26.4	0	0	147.29	4.62318e-06	1.08172e-09	92.0577	0	30	161.941	117.771	100002	100001	100001
26.45	0	0	147.29	4.37333e-06	9.96784e-10	92.0577	0	30	161.941	117.771	100002	100001	100001
26.5	0	0	147.29	4.13699e-06	9.18519e-10	92.0577	0	30	161.941	117.771	100002	100001	100001
26.55	0	0	147.29	3.91342e-06	8.46399e-10	92.0577	0	30	161.941	117.771	100002	100001	100001
26.6	0	0	147.29	3.70193e-06	7.79935e-10	92.0577	0	30	161.941	117.771	100002	100001	100001
26.65	0	0	147.29	3.50187e-06	7.18694e-10	92.0577	0	30	161.941	117.771	100002	100001	100001
26.7	0	0	147.29	3.31262e-06	6.62257e-10	92.0577	0	30	161.941	117.771	100002	100001	100001
26.75	0	0	147.29	3.1336e-06	6.10252e-10	92.0577	0	30	161.941	117.771	100002	100001	100001
26.8	0	0	147.29	2.96425e-06	5.6233e-10	92.0577	0	30	161.941	117.771	100002	100001	100001
26.85	0	0	147.29	2.80406e-06	5.1817e-10	92.0577	0	30	161.941	117.771	100002	100001	100001
26.9	0	0	147.29	2.65252e-06	4.77481e-10	92.0577	0	30	161.941	117.771	100002	100001	100001
26.95	0	0	147.29	2.50917e-06	4.39985e-10	92.0577	0	30	161.941	117.771	100002	100001	100001
27	0	0	147.29	2.37357e-06	4.05436e-10	92.0577	0	30	161.941	117.771	100002	100001	100001
27.05	0	0	147.29	2.2453e-06	3.736e-10	92.0577	0	30	161.941	117.771	100002	100001	100001
27.1	0	0	147.29	2.12395e-06	3.44263e-10	92.0577	0	30	161.941	117.771	100002	100001	100001
27.15	0	0	147.29	2.00917e-06	3.17231e-10	92.0577	0	30	161.941	117.771	100002	100001	100001
27.2	0	0	147.29	1.90059e-06	2.92321e-10	92.0577	0	30	161.941	117.771	100002	100001	100001
27.25	0	0	147.29	1.79788e-06	2.69366e-10	92.0577	0	30	161.941	117.771	100002	100001	100001
27.3	0	0	147.29	1.70072e-06	2.48214e-10	92.0577	0	30	161.941	117.771	100002	100001	100001
27.35	0	0	147.29	1.60881e-06	2.28722e-10	92.0577	0	30	161.941	117.771	100002	100001	100001
27.4	0	0	147.29	1.52186e-06	2.10761e-10	92.0577	0	30	161.941	117.771	100002	100001	100001
27.45	0	0	147.29	1.43962e-06	1.94211e-10	92.0577	0	30	161.941	117.771	100002	100001	100001
27.5	0	0	147.29	1.36182e-06	1.7896e-10	92.0577	0	30	161.941	117.771	100002	100001	100001
27.55	0	0	147.29	1.28822e-06	1.64907e-10	92.0577	0	30	161.941	117.771	100002	100001	100001
27.6	0	0	147.29	1.2186e-06	1.51957e-10	92.0577	0	30	161.941	117.771	100002	100001	100001
27.65	0	0	147.29	1.15275e-06	1.40025e-10	92.0577	0	30	161.941	117.771	100002	100001	100001
27.7	0	0	147.29	1.09045e-06	1.2903e-10	92.0577	0	30	161.941	117.771	100002	100001	100001
27.75	0	0	147.29	1.03152e-06	1.18898e-10	92.0577	0	30	161.941	117.771	100002	100001	100001
27.8	0	0	147.29	9.75775e-07	1.09562e-10	92.0577	0	30	161.941	117.771	100002	100001	100001
27.85	0	0	147.29	9.23041e-07	1.00958e-10	92.0577	0	30	161.941	117.771	100002	100001	100001
27.9	0	0	147.29	8.73158e-07	9.30303e-11	92.0577	0	30	161.941	117.771	100002	100001	100001
27.95	0	0	147.29	8.25971e-07	8.5725e-11	92.0577	0	30	161.941	117.771	100002	100001	100001
28	0	0	147.29	7.81333e-07	7.89932e-11	92.0577	0	30	161.941	117.771	100002	100001	100001
28.05	0	0	147.29	7.39109e-07	7.27905e-11	92.0577	0	30	161.941	117.771	100002	100001	100001
28.1	0	0	147.29	6.99166e-07	6.70749e-11	92.0577	0	30	161.941	117.771	100002	100001	100001
28.15	0	0	147.29	6.61382e-07	6.18084e-11	92.0577	0	30	161.941	117.771	100002	100001	100001
28.2	0	0	147.29	6.25639e-07	5.69556e-11	92.0577	0	30	161.941	117.771	100002	100001	100001
28.25	0	0	147.29	5.91829e-07	5.24836e-11	92.0577	0	30	161.941	117.771	100002	100001	100001
28.3	0	0	147.29	5.59845e-07	4.83629e-11	92.0577	0	30	161.941	117.771	100002	100001	100001
28.35	0	0	147.29	5.2959e-07	4.45654e-11	92.0577	0	30	161.941	117.771	100002	100001	100001
28.4	0	0	147.29	5.0097e-07	4.1066e-11	92.0577	0	30	161.941	117.771	100002	100001	100001
28.45	0	0	147.29	4.73897e-07	3.78416e-11	92.0577	0	30	161.941	117.771	100002	100001	100001
28.5	0	0	147.29	4.48286e-07	3.48704e-11	92.0577	0	30	161.941	117.771	100002	100001	100001
28.55	0	0	147.29	4.2406e-07	3.21325e-11	92.0577	0	30	161.941	117.771	100002	100001	100001
28.6	0	0	147.29	4.01143e-07	2.96095e-11	92.0577	0	30	161.941	117.771	100002	100001	100001
28.65	0	0	147.29	3.79465e-07	2.72845e-11	92.0577	0	30	161.941	117.771	100002	100001	100001
28.7	0	0	147.29	3.58958e-07	2.51423e-11	92.0577	0	30	161.941	117.771	100002	100001	100001
28.75	0	0	147.29	3.39559e-07	2.31683e-11	92.0577	0	30	161.941	117.771	100002	100001	100001
28.8	0	0	147.29	3.21209e-07	2.13494e-11	92.0577	0	30	161.941	117.771	100002	100001	100001
28.85	0	0	147.29	3.0385e-07	1.96732e-11	92.0577	0	30	161.941	117.771	100002	100001	100001
28.9	0	0	147.29	2.8743e-07	1.81286e-11	92.0577	0	30	161.941	117.771	100002	100001	100001
28.95	0	0	147.29	2.71897e-07	1.67053e-11	92.0577	0	30	161.941	117.771	100002	100001	100001
29	0	0	147.29	2.57203e-07	1.53938e-11	92.0577	0	30	161.941	117.771	100002	100001	100001
29.05	0	0	147.29	2.43303e-07	1.41853e-11	92.0577	0	30	161.941	117.771	100002	100001	100001
29.1	0	0	147.29	2.30155e-07	1.30715e-11	92.0577	0	30	161.941	117.771	100002	100001	100001
29.15	0	0	147.29	2.17717e-07	1.20452e-11	92.0577	0	30	161.941	117.771	100002	100001	100001
29.2	0	0	147.29	2.05951e-07	1.10994e-11	92.0577	0	30	161.941	117.771	100002	100001	100001
29.25	0	0	147.29	1.94821e-07	1.0228e-11	92.0577	0	30	161.941	117.771	100002	100001	100001
29.3	0	0	147.29	1.84293e-07	9.42498e-12	92.0577	0	30	161.941	117.771	100002	100001	100001
29.35	0	0	147.29	1.74333e-07	8.68497e-12	92.0577	0	30	161.941	117.771	100002	100001	100001
29.4	0	0	147.29	1.64912e-07	8.00302e-12	92.0577	0	30	161.941	117.771	100002	100001	100001
29.45	0	0	147.29	1.56e-07	7.37468e-12	92.0577	0	30	161.941	117.771	100002	100001	100001
29.5	0	0	147.29	1.47569e-07	6.79569e-12	92.0577	0	30	161.941	117.771	100002	100001	100001
29.55	0	0	147.29	1.39594e-07	6.26217e-12	92.0577	0	30	161.941	117.771	100002	100001	100001
29.6	0	0	147.29	1.32051e-07	5.77053e-12	92.0577	0	30	161.941	117.771	100002	100001	100001
29.65	0	0	147.29	1.24914e-07	5.31744e-12	92.0577	0	30	161.941	117.771	100002	100001	100001
29.7	0	0	147.29	1.18164e-07	4.89996e-12	92.0577	0	30	161.941	117.771	100002	100001	100001
29.75	0	0	147.29	1.11778e-07	4.51527e-12	92.0577	0	30	161.941	117.771	100002	100001	100001
29.8	0	0	147.29	1.05737e-07	4.16078e-12	92.0577	0	30	161.941	117.771	100002	100001	100001
29.85	0	0	147.29	1.00023e-07	3.83411e-12	92.0577	0	30	161.941	117.771	100002	100001	100001
29.9	0	0	147.29	9.46177e-08	3.53305e-12	92.0577	0	30	161.941	117.771	100002	100001	100001
29.95	0	0	147.29	8.95044e-08	3.25566e-12	92.0577	0	30	161.941	117.771	100002	100001	100001
30	0	0	147.29	8.46674e-08	3.00004e-12	92.0577	0	30	161.941	117.771	100002	100001	100001
30.05	0	0	147.29	8.00919e-08	2.76451e-12	92.0577	0	30	161.941	117.771	100002	100001	100001
30.1	0	0	147.29	7.57636e-08	2.54746e-12	92.0577	0	30	161.941	117.771	100002	100001	100001
30.15	0	0	147.29	7.16692e-08	2.34743e-12	92.0577	0	30	161.941	117.771	100002	100001	100001
30.2	0	0	147.29	6.77961e-08	2.16313e-12	92.0577	0	30	161.941	117.771	100002	100001	100001
30.25	0	0	147.29	6.41323e-08	1.9933e-12	92.0577	0	30	161.941	117.771	100002	100001	100001
30.3	0	0	147.29	6.06665e-08	1.8368e-12	92.0577	0	30	161.941	117.771	100002	100001	100001
30.35	0	0	147.29	5.73879e-08	1.6926e-12	92.0577	0	30	161.941	117.771	100002	100001	100001
30.4	0	0	147.29	5.42866e-08	1.5597e-12	92.0577	0	30	161.941	117.771	100002	100001	100001
30.45	0	0	147.29	5.1353e-08	1.4373e-12	92.0577	0	30	161.941	117.771	100002	100001	100001
30.5	0	0	147.29	4.85779e-08	1.32453e-12	92.0577	0	30	161.941	117.771	100002	100001	100001
30.55	0	0	147.29	4.59529e-08	1.22065e-12	92.0577	0	30	161.941	117.771	100002	100001	100001
30.6	0	0	147.29	4.34697e-08	1.12493e-12	92.0577	0	30	161.941	117.771	100002	100001	100001
30.65	0	0	147.29	4.11209e-08	1.03682e-12	92.0577	0	30	161.941	117.771	100002	100001	100001
30.7	0	0	147.29	3.88991e-08	9.55624e-13	92.0577	0	30	161.941	117.771	100002	100001	100001
30.75	0	0	147.29	3.67973e-08	8.80745e-13	92.0577	0	30	161.941	117.771	100002	100001	100001
30.8	0	0	147.29	3.48089e-08	8.11682e-13	92.0577	0	30	161.941	117.771	100002	100001	100001
30.85	0	0	147.29	3.29282e-08	7.48126e-13	92.0577	0	30	161.941	117.771	100002	100001	100001
30.9	0	0	147.29	3.11491e-08	6.89526e-13	92.0577	0	30	161.941	117.771	100002	100001	100001
30.95	0	0	147.29	2.9466e-08	6.35452e-13	92.0577	0	30	161.941	117.771	100002	100001	100001
31	0	0	147.29	2.78738e-08	5.85569e-13	92.0577	0	30	161.941	117.771	100002	100001	100001
31.05	0	0	147.29	2.63677e-08	5.39622e-13	92.0577	0	30	161.941	117.771	100002	100001	100001
31.1	0	0	147.29	2.49429e-08	4.97256e-13	92.0577	0	30	161.941	117.771	100002	100001	100001
31.15	0	0	147.29	2.3595e-08	4.58194e-13	92.0577	0	30	161.941	117.771	100002	100001	100001
31.2	0	0	147.29	2.232e-08	4.22188e-13	92.0577	0	30	161.941	117.771	100002	100001	100001
31.25	0	0	147.29	2.11139e-08	3.89012e-13	92.0577	0	30	161.941	117.771	100002	100001	100001
31.3	0	0	147.29	1.9973e-08	3.58451e-13	92.0577	0	30	161.941	117.771	100002	100001	100001
31.35	0	0	147.29	1.88938e-08	3.30305e-13	92.0577	0	30	161.941	117.771	100002	100001	100001
31.4	0	0	147.29	1.78729e-08	3.04385e-13	92.0577	0	30	161.941	117.771	100002	100001	100001
31.45	0	0	147.29	1.69072e-08	2.80513e-13	92.0577	0	30	161.941	117.771	100002	100001	100001
31.5	0	0	147.29	1.59938e-08	2.58519e-13	92.0577	0	30	161.941	117.771	100002	100001	100001
31.55	0	0	147.29	1.51296e-08	2.38236e-13	92.0577	0	30	161.941	117.771	100002	100001	100001
31.6	0	0	147.29	1.43123e-08	2.19617e-13	92.0577	0	30	161.941	117.771	100002	100001	100001
31.65	0	0	147.29	1.35394e-08	2.02525e-13	92.0577	0	30	161.941	117.771	100002	100001	100001
31.7	0	0	147.29	1.28085e-08	1.86809e-13	92.0577	0	30	161.941	117.771	100002	100001	100001
31.75	0	0	147.29	1.21171e-08	1.72336e-13	92.0577	0	30	161.941	117.771	100002	100001	100001
31.8	0	0	147.29	1.14629e-08	1.58967e-13	92.0577	0	30	161.941	117.771	100002	100001	100001
31.85	0	0	147.29	1.08438e-08	1.4655e-13	92.0577	0	30	161.941	117.771	100002	100001	100001
31.9	0	0	147.29	1.02585e-08	1.35181e-13	92.0577	0	30	161.941	117.771	100002	100001	100001
31.95	0	0	147.29	9.70555e-09	1.24864e-13	92.0577	0	30	161.941	117.771	100002	100001	100001
32	0	0	147.29	9.18257e-09	1.15369e-13	92.0577	0	30	161.941	117.771	100002	100001	100001
32.05	0	0	147.29	8.68781e-09	1.06593e-13	92.0577	0	30	161.941	117.771	100002	100001	100001
32.1	0	0	147.29	8.21954e-09	9.84213e-14	92.0577	0	30	161.941	117.771	100002	100001	100001
32.15	0	0	147.29	7.77602e-09	9.07286e-14	92.0577	0	30	161.941	117.771	100002	100001	100001
32.2	0	0	147.29	7.35598e-09	8.34985e-14	92.0577	0	30	161.941	117.771	100002	100001	100001
32.25	0	0	147.29	6.9589e-09	7.68926e-14	92.0577	0	30	161.941	117.771	100002	100001	100001
32.3	0	0	147.29	6.58305e-09	7.0748e-14	92.0577	0	30	161.941	117.771	100002	100001	100001
32.35	0	0	147.29	6.2273e-09	6.50549e-14	92.0577	0	30	161.941	117.771	100002	100001	100001
32.4	0	0	147.29	5.89063e-09	5.98201e-14	92.0577	0	30	161.941	117.771	100002	100001	100001
32.45	0	0	147.29	5.5719e-09	5.4904e-14	92.0577	0	30	161.941	117.771	100002	100001	100001
32.5	0	0	147.29	5.27025e-09	5.03322e-14	92.0577	0	30	161.941	117.771	100002	100001	100001
32.55	0	0	147.29	4.98487e-09	4.61078e-14	92.0577	0	30	161.941	117.771	100002	100001	100001
32.6	0	0	147.29	4.715e-09	4.22264e-14	92.0577	0	30	161.941	117.771	100002	100001	100001
32.65	0	0	147.29	4.4598e-09	3.86717e-14	92.0577	0	30	161.941	117.771	100002	100001	100001
32.7	0	0	147.29	4.21834e-09	3.54134e-14	92.0577	0	30	161.941	117.771	100002	100001	100001
32.75	0	0	147.29	3.99004e-09	3.2458e-14	92.0577	0	30	161.941	117.771	100002	100001	100001
32.8	0	0	147.29	3.77422e-09	2.97971e-14	92.0577	0	30	161.941	117.771	100002	100001	100001
32.85	0	0	147.29	3.57021e-09	2.74218e-14	92.0577	0	30	161.941	117.771	100002	100001	100001
32.9	0	0	147.29	3.37737e-09	2.52614e-14	92.0577	0	30	161.941	117.771	100002	100001	100001
32.95	0	0	147.29	3.19505e-09	2.33024e-14	92.0577	0	30	161.941	117.771	100002	100001	100001
33	0	0	147.29	3.02263e-09	2.1506e-14	92.0577	0	30	161.941	117.771	100002	100001	100001
33.05	0	0	147.29	2.85947e-09	1.98222e-14	92.0577	0	30	161.941	117.771	100002	100001	100001
33.1	0	0	147.29	2.70524e-09	1.8296e-14	92.0577	0	30	161.941	117.771	100002	100001	100001
33.15	0	0	147.29	2.55971e-09	1.70022e-14	92.0577	0	30	161.941	117.771	100002	100001	100001
33.2	0	0	147.29	2.42217e-09	1.58374e-14	92.0577	0	30	161.941	117.771	100002	100001	100001
33.25	0	0	147.29	2.2921e-09	1.47681e-14	92.0577	0	30	161.941	117.771	100002	100001	100001
33.3	0	0	147.29	2.16898e-09	1.37518e-14	92.0577	0	30	161.941	117.771	100002	100001	100001
33.35	0	0	147.29	2.05227e-09	1.27354e-14	92.0577	0	30	161.941	117.771	100002	100001	100001
33.4	0	0	147.29	1.9415e-09	1.16772e-14	92.0577	0	30	161.941	117.771	100002	100001	100001
33.45	0	0	147.29	1.83747e-09	1.09005e-14	92.0577	0	30	161.941	117.771	100002	100001	100001
33.5	0	0	147.29	1.73908e-09	1.01791e-14	92.0577	0	30	161.941	117.771	100002	100001	100001
33.55	0	0	147.29	1.64597e-09	9.49269e-15	92.0577	0	30	161.941	117.771	100002	100001	100001
33.6	0	0	147.29	1.55776e-09	8.81621e-15	92.0577	0	30	161.941	117.771	100002	100001	100001
33.65	0	0	147.29	1.47407e-09	8.11952e-15	92.0577	0	30	161.941	117.771	100002	100001	100001
33.7	0	0	147.29	1.39451e-09	7.36648e-15	92.0577	0	30	161.941	117.771	100002	100001	100001
33.75	0	0	147.29	1.31938e-09	6.69355e-15	92.0577	0	30	161.941	117.771	100002	100001	100001
33.8	0	0	147.29	1.2485e-09	6.11089e-15	92.0577	0	30	161.941	117.771	100002	100001	100001
33.85	0	0	147.29	1.18136e-09	5.55238e-15	92.0577	0	30	161.941	117.771	100002	100001	100001
33.9	0	0	147.29	1.11776e-09	5.01661e-15	92.0577	0	30	161.941	117.771	100002	100001	100001
33.95	0	0	147.29	1.05747e-09	4.50251e-15	92.0577	0	30	161.941	117.771	100002	100001	100001
34	0	0	147.29	1.00029e-09	4.00914e-15	92.0577	0	30	161.941	117.771	100002	100001	100001
34.05	0	0	147.29	9.46072e-10	3.54143e-15	92.0577	0	30	161.941	117.771	100002	100001	100001
34.1	0	0	147.29	8.94871e-10	3.11836e-15	92.0577	0	30	161.941	117.771	100002	100001	100001
34.15	0	0	147.29	8.46396e-10	2.73231e-15	92.0577	0	30	161.941	117.771	100002	100001	100001
34.2	0	0	147.29	8.00517e-10	2.3877e-15	92.0577	0	30	161.941	117.771	100002	100001	100001
34.25	0	0	147.29	7.57108e-10	2.08946e-15	92.0577	0	30	161.941	117.771	100002	100001	100001
34.3	0	0	147.29	7.16055e-10	1.84299e-15	92.0577	0	30	161.941	117.771	100002	100001	100001
34.35	0	0	147.29	6.77249e-10	1.65415e-15	92.0577	0	30	161.941	117.771	100002	100001	100001
34.4	0	0	147.29	6.40521e-10	1.4702e-15	92.0577	0	30	161.941	117.771	100002	100001	100001
34.45	0	0	147.29	6.05783e-10	1.30518e-15	92.0577	0	30	161.941	117.771	100002	100001	100001
34.5	0	0	147.29	5.72939e-10	1.15881e-15	92.0577	0	30	161.941	117.771	100002	100001	100001
34.55	0	0	147.29	5.41885e-10	1.02184e-15	92.0577	0	30	161.941	117.771	100002	100001	100001
34.6	0	0	147.29	5.12517e-10	8.82807e-16	92.0577	0	30	161.941	117.771	100002	100001	100001
34.65	0	0	147.29	4.84733e-10	7.27761e-16	92.0577	0	30	161.941	117.771	100002	100001	100001
34.7	0	0	147.29	4.5849e-10	5.96466e-16	92.0577	0	30	161.941	117.771	100002	100001	100001
34.75	0	0	147.29	4.33757e-10	5.41421e-16	92.0577	0	30	161.941	117.771	100002	100001	100001
34.8	0	0	147.29	4.10406e-10	5.1885e-16	92.0577	0	30	161.941	117.771	100002	100001	100001
34.85	0	0	147.29	3.88358e-10	5.34208e-16	92.0577	0	30	161.941	117.771	100002	100001	100001
34.9	0	0	147.29	3.67535e-10	5.94294e-16	92.0577	0	30	161.941	117.771	100002	100001	100001
34.95	0	0	147.29	3.47861e-10	7.07371e-16	92.0577	0	30	161.941	117.771	100002	100001	100001
35	0	0	147.29	3.2926e-10	8.76543e-16	92.0577	0	30	161.941	117.771	100002	100001	100001
35.05	0	0	147.29	3.11733e-10	9.57742e-16	92.0577	0	30	161.941	117.771	100002	100001	100001
35.1	0	0	147.29	2.9517e-10	1.01818e-15	92.0577	0	30	161.941	117.771	100002	100001	100001
35.15	0	0	147.29	2.79507e-10	1.03979e-15	92.0577	0	30	161.941	117.771	100002	100001	100001
35.2	0	0	147.29	2.64677e-10	1.00121e-15	92.0577	0	30	161.941	117.771	100002	100001	100001
35.25	0	0	147.29	2.50614e-10	8.77546e-16	92.0577	0	30	161.941	117.771	100002	100001	100001
35.3	0	0	147.29	2.37249e-10	6.40089e-16	92.0577	0	30	161.941	117.771	100002	100001	100001
35.35	0	0	147.29	2.24627e-10	4.58797e-16	92.0577	0	30	161.941	117.771	100002	100001	100001
35.4	0	0	147.29	2.12723e-10	3.75779e-16	92.0577	0	30	161.941	117.771	100002	100001	100001
35.45	0	0	147.29	2.01455e-10	3.3657e-16	92.0577	0	30	161.941	117.771	100002	100001	100001
35.5	0	0	147.29	1.90792e-10	3.71543e-16	92.0577	0	30	161.941	117.771	100002	100001	100001
35.55	0	0	147.29	1.80705e-10	5.177e-16	92.0577	0	30	161.941	117.771	100002	100001	100001
35.6	0	0	147.29	1.71169e-10	8.19181e-16	92.0577	0	30	161.941	117.771	100002	100001	100001
35.65	0	0	147.29	1.62143e-10	1.21157e-15	92.0577	0	30	161.941	117.771	100002	100001	100001
35.7	0	0	147.29	1.53542e-10	1.31235e-15	92.0577	0	30	161.941	117.771	100002	100001	100001
35.75	0	0	147.29	1.45374e-10	1.33712e-15	92.0577	0	30	161.941	117.771	100002	100001	100001
35.8	0	0	147.29	1.37609e-10	1.24033e-15	92.0577	0	30	161.941	117.771	100002	100001	100001
35.85	0	0	147.29	1.30219e-10	9.66759e-16	92.0577	0	30	161.941	117.771	100002	100001	100001
35.9	0	0	147.29	1.23174e-10	4.50672e-16	92.0577	0	30	161.941	117.771	100002	100001	100001
35.95	0	0	147.29	1.16448e-10	-3.84907e-16	92.0577	0	30	161.941	117.771	100002	100001	100001
36	0	0	147.29	1.10102e-10	-8.43832e-16	92.0577	0	30	161.941	117.771	100002	100001	100001
36.05	0	0	147.29	1.041e-10	-1.1013e-15	92.0577	0	30	161.941	117.771	100002	100001	100001
36.1	0	0	147.29	9.84243e-11	-1.18712e-15	92.0577	0	30	161.941	117.771	100002	100001	100001
36.15	0	0	147.29	9.3072e-11	-1.0087e-15	92.0577	0	30	161.941	117.771	100002	100001	100001
36.2	0	0	147.29	8.80437e-11	-4.55335e-16	92.0577	0	30	161.941	117.771	100002	100001	100001
36.25	0	0	147.29	8.33431e-11	6.03144e-16	92.0577	0	30	161.941	117.771	100002	100001	100001
36.3	0	0	147.29	7.89068e-11	1.68375e-15	92.0577	0	30	161.941	117.771	100002	100001	100001
36.35	0	0	147.29	7.46466e-11	2.07475e-15	92.0577	0	30	161.941	117.771	100002	100001	100001
36.4	0	0	147.29	7.06067e-11	2.23836e-15	92.0577	0	30	161.941	117.771	100002	100001	100001
36.45	0	0	147.29	6.6764e-11	2.02948e-15	92.0577	0	30	161.941	117.771	100002	100001	100001
36.5	0	0	147.29	6.30931e-11	1.27252e-15	92.0577	0	30	161.941	117.771	100002	100001	100001
36.55	0	0	147.29	5.95653e-11	-2.40986e-16	92.0577	0	30	161.941	117.771	100002	100001	100001
36.6	0	0	147.29	5.61542e-11	-2.69219e-15	92.0577	0	30	161.941	117.771	100002	100001	100001
36.65	0	0	147.29	5.3013e-11	-4.18916e-15	92.0577	0	30	161.941	117.771	100002	100001	100001
36.7	0	0	147.29	5.00364e-11	-5.80787e-15	92.0577	0	30	161.941	117.771	100002	100001	100001
36.75	0	0	147.29	4.72201e-11	-7.45625e-15	92.0577	0	30	161.941	117.771	100002	100001	100001
36.8	0	0	147.29	4.45612e-11	-9.01404e-15	92.0577	0	30	161.941	117.771	100002	100001	100001
36.85	0	0	147.29	4.20587e-11	-1.03302e-14	92.0577	0	30	161.941	117.771	100002	100001	100001
36.9	0	0	147.29	3.9713e-11	-1.12205e-14	92.0577	0	30	161.941	117.771	100002	100001	100001
36.95	0	0	147.29	3.74881e-11	-1.23243e-14	92.0577	0	30	161.941	117.771	100002	100001	100001
37	0	0	147.29	3.53708e-11	-1.3769e-14	92.0577	0	30	161.941	117.771	100002	100001	100001
37.05	0	0	147.29	3.33708e-11	-1.51825e-14	92.0577	0	30	161.941	117.771	100002	100001	100001
37.1	0	0	147.29	3.14814e-11	-1.65572e-14	92.0577	0	30	161.941	117.771	100002	100001	100001
37.15	0	0	147.29	2.96958e-11	-1.78903e-14	92.0577	0	30	161.941	117.771	100002	100001	100001
37.2	0	0	147.29	2.80071e-11	-1.91849e-14	92.0577	0	30	161.941	117.771	100002	100001	100001
37.25	0	0	147.29	2.6413e-11	-2.03529e-14	92.0577	0	30	161.941	117.771	100002	100001	100001
37.3	0	0	147.29	2.49268e-11	-2.1037e-14	92.0577	0	30	161.941	117.771	100002	100001	100001
37.35	0	0	147.29	2.3531e-11	-2.14564e-14	92.0577	0	30	161.941	117.771	100002	100001	100001
37.4	0	0	147.29	2.22214e-11	-2.15832e-14	92.0577	0	30	161.941	117.771	100002	100001	100001
37.45	0	0	147.29	2.0994e-11	-2.13909e-14	92.0577	0	30	161.941	117.771	100002	100001	100001
37.5	0	0	147.29	1.98449e-11	-2.08543e-14	92.0577	0	30	161.941	117.771	100002	100001	100001
37.55	0	0	147.29	1.87703e-11	-1.99498e-14	92.0577	0	30	161.941	117.771	100002	100001	100001
37.6	0	0	147.29	1.77668e-11	-1.86553e-14	92.0577	0	30	161.941	117.771	100002	100001	100001
37.65	0	0	147.29	1.6831e-11	-1.69497e-14	92.0577	0	30	161.941	117.771	100002	100001	100001
37.7	0	0	147.29	1.59597e-11	-1.48138e-14	92.0577	0	30	161.941	117.771	100002	100001	100001
37.75	0	0	147.29	1.51357e-11	-1.28857e-14	92.0577	0	30	161.941	117.771	100002	100001	100001
37.8	0	0	147.29	1.43469e-11	-1.15966e-14	92.0577	0	30	161.941	117.771	100002	100001	100001
37.85	0	0	147.29	1.3601e-11	-1.04302e-14	92.0577	0	30	161.941	117.771	100002	100001	100001
37.9	0	0	147.29	1.28936e-11	-9.46354e-15	92.0577	0	30	161.941	117.771	100002	100001	100001
37.95	0	0	147.29	1.22202e-11	-8.78002e-15	92.0577	0	30	161.941	117.771	100002	100001	100001
38	0	0	147.29	1.15764e-11	-8.46958e-15	92.0577	0	30	161.941	117.771	100002	100001	100001
38.05	0	0	147.29	1.09578e-11	-8.62868e-15	92.0577	0	30	161.941	117.771	100002	100001	100001
38.1	0	0	147.29	1.03602e-11	-9.36029e-15	92.0577	0	30	161.941	117.771	100002	100001	100001
38.15	0	0	147.29	9.77936e-12	-1.07739e-14	92.0577	0	30	161.941	117.771	100002	100001	100001
38.2	0	0	147.29	9.21104e-12	-1.29855e-14	92.0577	0	30	161.941	117.771	100002	100001	100001
38.25	0	0	147.29	8.7004e-12	-1.32907e-14	92.0577	0	30	161.941	117.771	100002	100001	100001
38.3	0	0	147.29	8.23426e-12	-1.23408e-14	92.0577	0	30	161.941	117.771	100002	100001	100001
38.35	0	0	147.29	7.79747e-12	-1.09088e-14	92.0577	0	30	161.941	117.771	100002	100001	100001
38.4	0	0	147.29	7.39036e-12	-8.89027e-15	92.0577	0	30	161.941	117.771	100002	100001	100001
38.45	0	0	147.29	7.01356e-12	-6.17261e-15	92.0577	0	30	161.941	117.771	100002	100001	100001
38.5	0	0	147.29	6.66799e-12	-2.63525e-15	92.0577	0	30	161.941	117.771	100002	100001	100001
38.55	0	0	147.29	6.3549e-12	1.85052e-15	92.0577	0	30	161.941	117.771	100002	100001	100001
38.6	0	0	147.29	6.07585e-12	7.42155e-15	92.0577	0	30	161.941	117.771	100002	100001	100001
38.65	0	0	147.29	5.83268e-12	1.42228e-14	92.0577	0	30	161.941	117.771	100002	100001	100001
38.7	0	0	147.29	5.62756e-12	2.24072e-14	92.0577	0	30	161.941	117.771	100002	100001	100001
38.75	0	0	147.29	5.36014e-12	2.50431e-14	92.0577	0	30	161.941	117.771	100002	100001	100001
38.8	0	0	147.29	5.09557e-12	2.66021e-14	92.0577	0	30	161.941	117.771	100002	100001	100001
38.85	0	0	147.29	4.83259e-12	2.69622e-14	92.0577	0	30	161.941	117.771	100002	100001	100001
38.9	0	0	147.29	4.56813e-12	2.58617e-14	92.0577	0	30	161.941	117.771	100002	100001	100001
38.95	0	0	147.29	4.299e-12	2.30206e-14	92.0577	0	30	161.941	117.771	100002	100001	100001
39	0	0	147.29	4.02199e-12	1.81409e-14	92.0577	0	30	161.941	117.771	100002	100001	100001
39.05	0	0	147.29	3.73379e-12	1.09067e-14	92.0577	0	30	161.941	117.771	100002	100001	100001
39.1	0	0	147.29	3.43101e-12	9.83792e-16	92.0577	0	30	161.941	117.771	100002	100001	100001
39.15	0	0	147.29	3.11021e-12	-1.19798e-14	92.0577	0	30	161.941	117.771	100002	100001	100001
39.2	0	0	147.29	2.78693e-12	-2.63892e-14	92.0577	0	30	161.941	117.771	100002	100001	100001
39.25	0	0	147.29	2.52237e-12	-3.59501e-14	92.0577	0	30	161.941	117.771	100002	100001	100001
39.3	0	0	147.29	2.26538e-12	-4.59665e-14	92.0577	0	30	161.941	117.771	100002	100001	100001
39.35	0	0	147.29	2.01783e-12	-5.62839e-14	92.0577	0	30	161.941	117.771	100002	100001	100001
39.4	0	0	147.29	1.78187e-12	-6.67306e-14	92.0577	0	30	161.941	117.771	100002	100001	100001
39.45	0	0	147.29	1.55992e-12	-7.71173e-14	92.0577	0	30	161.941	117.771	100002	100001	100001
39.5	0	0	147.29	1.35467e-12	-8.72377e-14	92.0577	0	30	161.941	117.771	100002	100001	100001
39.55	0	0	147.29	1.16909e-12	-9.68679e-14	92.0577	0	30	161.941	117.771	100002	100001	100001
39.6	0	0	147.29	1.00641e-12	-1.05767e-13	92.0577	0	30	161.941	117.771	100002	100001	100001
39.65	0	0	147.29	8.70139e-13	-1.13676e-13	92.0577	0	30	161.941	117.771	100002	100001	100001
39.7	0	0	147.29	7.29049e-13	-1.21492e-13	92.0577	0	30	161.941	117.771	100002	100001	100001
39.75	0	0	147.29	5.63505e-13	-1.29717e-13	92.0577	0	30	161.941	117.771	100002	100001	100001
39.8	0	0	147.29	4.04806e-13	-1.37134e-13	92.0577	0	30	161.941	117.771	100002	100001	100001
39.85	0	0	147.29	2.52758e-13	-1.43578e-13	92.0577	0	30	161.941	117.771	100002	100001	100001
39.9	0	0	147.29	1.07147e-13	-1.48873e-13	92.0577	0	30	161.941	117.771	100002	100001	100001
39.95	0	0	147.29	-3.22572e-14	-1.52836e-13	92.0577	0	30	161.941	117.771	100002	100001	100001
40	0	0	147.29	-1.657e-13	-1.55276e-13	92.0577	0	30	161.941	117.771	100002	100001	100001
40.05	0	0	147.29	-2.93445e-13	-1.55997e-13	92.0577	0	30	161.941	117.771	100002	100001	100001
40.1	0	0	147.29	-4.15772e-13	-1.54791e-13	92.0577	0	30	161.941	117.771	100002	100001	100001
40.15	0	0	147.29	-5.32978e-13	-1.51445e-13	92.0577	0	30	161.941	117.771	100002	100001	100001
40.2	0	0	147.29	-6.28473e-13	-1.50245e-13	92.0577	0	30	161.941	117.771	100002	100001	100001
40.25	0	0	147.29	-7.05681e-13	-1.50135e-13	92.0577	0	30	161.941	117.771	100002	100001	100001
40.3	0	0	147.29	-7.68779e-13	-1.4986e-13	92.0577	0	30	161.941	117.771	100002	100001	100001
40.35	0	0	147.29	-8.16657e-13	-1.49568e-13	92.0577	0	30	161.941	117.771	100002	100001	100001
40.4	0	0	147.29	-8.48132e-13	-1.49423e-13	92.0577	0	30	161.941	117.771	100002	100001	100001
40.45	0	0	147.29	-8.61952e-13	-1.49607e-13	92.0577	0	30	161.941	117.771	100002	100001	100001
40.5	0	0	147.29	-8.56794e-13	-1.50316e-13	92.0577	0	30	161.941	117.771	100002	100001	100001
40.55	0	0	147.29	-8.31263e-13	-1.5176e-13	92.0577	0	30	161.941	117.771	100002	100001	100001
40.6	0	0	147.29	-7.83895e-13	-1.54168e-13	92.0577	0	30	161.941	117.771	100002	100001	100001
40.65	0	0	147.29	-7.13155e-13	-1.57782e-13	92.0577	0	30	161.941	117.771	100002	100001	100001
40.7	0	0	147.29	-6.96555e-13	-1.58366e-13	92.0577	0	30	161.941	117.771	100002	100001	100001
40.75	0	0	147.29	-6.74434e-13	-1.5924e-13	92.0577	0	30	161.941	117.771	100002	100001	100001
40.8	0	0	147.29	-6.44944e-13	-1.60596e-13	92.0577	0	30	161.941	117.771	100002	100001	100001
40.85	0	0	147.29	-6.07732e-13	-1.62543e-13	92.0577	0	30	161.941	117.771	100002	100001	100001
40.9	0	0	147.29	-5.62448e-13	-1.65191e-13	92.0577	0	30	161.941	117.771	100002	100001	100001
40.95	0	0	147.29	-5.08741e-13	-1.68649e-13	92.0577	0	30	161.941	117.771	100002	100001	100001
41	0	0	147.29	-4.4626e-13	-1.73026e-13	92.0577	0	30	161.941	117.771	100002	100001	100001
41.05	0	0	147.29	-3.74654e-13	-1.78433e-13	92.0577	0	30	161.941	117.771	100002	100001	100001
41.1	0	0	147.29	-2.93571e-13	-1.84977e-13	92.0577	0	30	161.941	117.771	100002	100001	100001
41.15	0	0	147.29	-2.02661e-13	-1.92769e-13	92.0577	0	30	161.941	117.771	100002	100001	100001
41.2	0	0	147.29	-1.01573e-13	-2.01918e-13	92.0577	0	30	161.941	117.771	100002	100001	100001
41.25	0	0	147.29	1.00451e-14	-2.12533e-13	92.0577	0	30	161.941	117.771	100002	100001	100001
41.3	0	0	147.29	1.32543e-13	-2.24724e-13	92.0577	0	30	161.941	117.771	100002	100001	100001
41.35	0	0	147.29	2.66273e-13	-2.38599e-13	92.0577	0	30	161.941	117.771	100002	100001	100001
41.4	0	0	147.29	4.11585e-13	-2.54268e-13	92.0577	0	30	161.941	117.771	100002	100001	100001
41.45	0	0	147.29	5.51226e-13	-2.69807e-13	92.0577	0	30	161.941	117.771	100002	100001	100001
41.5	0	0	147.29	6.48371e-13	-2.81031e-13	92.0577	0	30	161.941	117.771	100002	100001	100001
41.55	0	0	147.29	7.45174e-13	-2.92878e-13	92.0577	0	30	161.941	117.771	100002	100001	100001
41.6	0	0	147.29	8.41223e-13	-3.0537e-13	92.0577	0	30	161.941	117.771	100002	100001	100001
41.65	0	0	147.29	9.36103e-13	-3.18526e-13	92.0577	0	30	161.941	117.771	100002	100001	100001
41.7	0	0	147.29	1.0294e-12	-3.32369e-13	92.0577	0	30	161.941	117.771	100002	100001	100001
41.75	0	0	147.29	1.12071e-12	-3.46918e-13	92.0577	0	30	161.941	117.771	100002	100001	100001
41.8	0	0	147.29	1.2096e-12	-3.62197e-13	92.0577	0	30	161.941	117.771	100002	100001	100001
41.85	0	0	147.29	1.29568e-12	-3.78224e-13	92.0577	0	30	161.941	117.771	100002	100001	100001
41.9	0	0	147.29	1.37852e-12	-3.95022e-13	92.0577	0	30	161.941	117.771	100002	100001	100001
41.95	0	0	147.29	1.45771e-12	-4.12611e-13	92.0577	0	30	161.941	117.771	100002	100001	100001
42	0	0	147.29	1.53285e-12	-4.31013e-13	92.0577	0	30	161.941	117.771	100002	100001	100001
42.05	0	0	147.29	1.60351e-12	-4.50248e-13	92.0577	0	30	161.941	117.771	100002	100001	100001
42.1	0	0	147.29	1.66928e-12	-4.70338e-13	92.0577	0	30	161.941	117.771	100002	100001	100001
42.15	0	0	147.29	1.72975e-12	-4.91303e-13	92.0577	0	30	161.941	117.771	100002	100001	100001
42.2	0	0	147.29	1.7845e-12	-5.13165e-13	92.0577	0	30	161.941	117.771	100002	100001	100001
42.25	0	0	147.29	1.83485e-12	-5.2265e-13	92.0577	0	30	161.941	117.771	100002	100001	100001
42.3	0	0	147.29	1.88042e-12	-5.19441e-13	92.0577	0	30	161.941	117.771	100002	100001	100001
42.35	0	0	147.29	1.91964e-12	-5.1252e-13	92.0577	0	30	161.941	117.771	100002	100001	100001
42.4	0	0	147.29	1.95214e-12	-5.0164e-13	92.0577	0	30	161.941	117.771	100002	100001	100001
42.45	0	0	147.29	1.97752e-12	-4.86551e-13	92.0577	0	30	161.941	117.771	100002	100001	100001
42.5	0	0	147.29	1.99543e-12	-4.67003e-13	92.0577	0	30	161.941	117.771	100002	100001	100001
42.55	0	0	147.29	2.00547e-12	-4.42748e-13	92.0577	0	30	161.941	117.771	100002	100001	100001
42.6	0	0	147.29	2.00726e-12	-4.13535e-13	92.0577	0	30	161.941	117.771	100002	100001	100001
42.65	0	0	147.29	2.00044e-12	-3.79116e-13	92.0577	0	30	161.941	117.771	100002	100001	100001
42.7	0	0	147.29	1.98462e-12	-3.39241e-13	92.0577	0	30	161.941	117.771	100002	100001	100001
42.75	0	0	147.29	1.95943e-12	-2.93661e-13	92.0577	0	30	161.941	117.771	100002	100001	100001
42.8	0	0	147.29	1.92448e-12	-2.42126e-13	92.0577	0	30	161.941	117.771	100002	100001	100001
42.85	0	0	147.29	1.87939e-12	-1.84387e-13	92.0577	0	30	161.941	117.771	100002	100001	100001
42.9	0	0	147.29	1.8238e-12	-1.20196e-13	92.0577	0	30	161.941	117.771	100002	100001	100001
42.95	0	0	147.29	1.75731e-12	-4.93016e-14	92.0577	0	30	161.941	117.771	100002	100001	100001
43	0	0	147.29	1.67956e-12	2.85444e-14	92.0577	0	30	161.941	117.771	100002	100001	100001
43.05	0	0	147.29	1.62491e-12	9.21598e-14	92.0577	0	30	161.941	117.771	100002	100001	100001
43.1	0	0	147.29	1.57085e-12	1.55443e-13	92.0577	0	30	161.941	117.771	100002	100001	100001
43.15	0	0	147.29	1.51235e-12	2.21519e-13	92.0577	0	30	161.941	117.771	100002	100001	100001
43.2	0	0	147.29	1.44948e-12	2.90357e-13	92.0577	0	30	161.941	117.771	100002	100001	100001
43.25	0	0	147.29	1.38231e-12	3.61927e-13	92.0577	0	30	161.941	117.771	100002	100001	100001
43.3	0	0	147.29	1.31091e-12	4.36198e-13	92.0577	0	30	161.941	117.771	100002	100001	100001
43.35	0	0	147.29	1.23537e-12	5.13142e-13	92.0577	0	30	161.941	117.771	100002	100001	100001
43.4	0	0	147.29	1.15576e-12	5.92727e-13	92.0577	0	30	161.941	117.771	100002	100001	100001
43.45	0	0	147.29	1.07215e-12	6.74925e-13	92.0577	0	30	161.941	117.771	100002	100001	100001
43.5	0	0	147.29	9.84621e-13	7.59703e-13	92.0577	0	30	161.941	117.771	100002	100001	100001
43.55	0	0	147.29	8.9324e-13	8.47034e-13	92.0577	0	30	161.941	117.771	100002	100001	100001
43.6	0	0	147.29	7.98086e-13	9.36886e-13	92.0577	0	30	161.941	117.771	100002	100001	100001
43.65	0	0	147.29	6.99232e-13	1.02923e-12	92.0577	0	30	161.941	117.771	100002	100001	100001
43.7	0	0	147.29	5.96754e-13	1.12404e-12	92.0577	0	30	161.941	117.771	100002	100001	100001
43.75	0	0	147.29	4.90725e-13	1.22127e-12	92.0577	0	30	161.941	117.771	100002	100001	100001
43.8	0	0	147.29	3.87698e-13	1.31206e-12	92.0577	0	30	161.941	117.771	100002	100001	100001
43.85	0	0	147.29	3.22258e-13	1.34892e-12	92.0577	0	30	161.941	117.771	100002	100001	100001
43.9	0	0	147.29	2.63197e-13	1.3744e-12	92.0577	0	30	161.941	117.771	100002	100001	100001
43.95	0	0	147.29	2.10515e-13	1.3885e-12	92.0577	0	30	161.941	117.771	100002	100001	100001
44	0	0	147.29	1.64212e-13	1.39122e-12	92.0577	0	30	161.941	117.771	100002	100001	100001
44.05	0	0	147.29	1.24289e-13	1.38255e-12	92.0577	0	30	161.941	117.771	100002	100001	100001
44.1	0	0	147.29	9.07438e-14	1.36249e-12	92.0577	0	30	161.941	117.771	100002	100001	100001
44.15	0	0	147.29	6.35782e-14	1.33105e-12	92.0577	0	30	161.941	117.771	100002	100001	100001
44.2	0	0	147.29	4.16394e-14	1.29103e-12	92.0577	0	30	161.941	117.771	100002	100001	100001
44.25	0	0	147.29	1.22743e-14	1.27322e-12	92.0577	0	30	161.941	117.771	100002	100001	100001
44.3	0	0	147.29	-1.39486e-14	1.25191e-12	92.0577	0	30	161.941	117.771	100002	100001	100001
44.35	0	0	147.29	-3.70292e-14	1.22708e-12	92.0577	0	30	161.941	117.771	100002	100001	100001
44.4	0	0	147.29	-5.69676e-14	1.19875e-12	92.0577	0	30	161.941	117.771	100002	100001	100001
44.45	0	0	147.29	-7.37638e-14	1.16691e-12	92.0577	0	30	161.941	117.771	100002	100001	100001
44.5	0	0	147.29	-8.74177e-14	1.13156e-12	92.0577	0	30	161.941	117.771	100002	100001	100001
44.55	0	0	147.29	-9.79294e-14	1.0927e-12	92.0577	0	30	161.941	117.771	100002	100001	100001
44.6	0	0	147.29	-1.05584e-13	1.05088e-12	92.0577	0	30	161.941	117.771	100002	100001	100001
44.65	0	0	147.29	-1.25298e-13	1.0345e-12	92.0577	0	30	161.941	117.771	100002	100001	100001
44.7	0	0	147.29	-1.43973e-13	1.01862e-12	92.0577	0	30	161.941	117.771	100002	100001	100001
44.75	0	0	147.29	-1.61609e-13	1.00323e-12	92.0577	0	30	161.941	117.771	100002	100001	100001
44.8	0	0	147.29	-1.78207e-13	9.88341e-13	92.0577	0	30	161.941	117.771	100002	100001	100001
44.85	0	0	147.29	-1.93767e-13	9.7395e-13	92.0577	0	30	161.941	117.771	100002	100001	100001
44.9	0	0	147.29	-2.08288e-13	9.60058e-13	92.0577	0	30	161.941	117.771	100002	100001	100001
44.95	0	0	147.29	-2.21771e-13	9.46664e-13	92.0577	0	30	161.941	117.771	100002	100001	100001
45	0	0	147.29	-2.34215e-13	9.33768e-13	92.0577	0	30	161.941	117.771	100002	100001	100001
45.05	0	0	147.29	-2.4562e-13	9.2137e-13	92.0577	0	30	161.941	117.771	100002	100001	100001
45.1	0	0	147.29	-2.55987e-13	9.0947e-13	92.0577	0	30	161.941	117.771	100002	100001	100001
45.15	0	0	147.29	-2.65316e-13	8.98069e-13	92.0577	0	30	161.941	117.771	100002	100001	100001
45.2	0	0	147.29	-2.73606e-13	8.87165e-13	92.0577	0	30	161.941	117.771	100002	100001	100001
45.25	0	0	147.29	-2.80858e-13	8.7676e-13	92.0577	0	30	161.941	117.771	100002	100001	100001
45.3	0	0	147.29	-2.78849e-13	8.48355e-13	92.0577	0	30	161.941	117.771	100002	100001	100001
45.35	0	0	147.29	-2.60298e-13	7.83679e-13	92.0577	0	30	161.941	117.771	100002	100001	100001
45.4	0	0	147.29	-2.41747e-13	7.19003e-13	92.0577	0	30	161.941	117.771	100002	100001	100001
45.45	0	0	147.29	-2.23196e-13	6.54327e-13	92.0577	0	30	161.941	117.771	100002	100001	100001
45.5	0	0	147.29	-2.04645e-13	5.89651e-13	92.0577	0	30	161.941	117.771	100002	100001	100001
45.55	0	0	147.29	-1.86094e-13	5.24975e-13	92.0577	0	30	161.941	117.771	100002	100001	100001
45.6	0	0	147.29	-1.67543e-13	4.60299e-13	92.0577	0	30	161.941	117.771	100002	100001	100001
45.65	0	0	147.29	-1.48992e-13	3.95623e-13	92.0577	0	30	161.941	117.771	100002	100001	100001
45.7	0	0	147.29	-1.35494e-13	3.51555e-13	92.0577	0	30	161.941	117.771	100002	100001	100001
45.75	0	0	147.29	-1.36301e-13	3.65824e-13	92.0577	0	30	161.941	117.771	100002	100001	100001
45.8	0	0	147.29	-1.37108e-13	3.80094e-13	92.0577	0	30	161.941	117.771	100002	100001	100001
45.85	0	0	147.29	-1.37916e-13	3.94364e-13	92.0577	0	30	161.941	117.771	100002	100001	100001
45.9	0	0	147.29	-1.38723e-13	4.08633e-13	92.0577	0	30	161.941	117.771	100002	100001	100001
45.95	0	0	147.29	-1.3953e-13	4.22903e-13	92.0577	0	30	161.941	117.771	100002	100001	100001
46	0	0	147.29	-1.40337e-13	4.37173e-13	92.0577	0	30	161.941	117.771	100002	100001	100001
46.05	0	0	147.29	-1.41144e-13	4.51443e-13	92.0577	0	30	161.941	117.771	100002	100001	100001
46.1	0	0	147.29	-1.40275e-13	4.54302e-13	92.0577	0	30	161.941	117.771	100002	100001	100001
46.15	0	0	147.29	-1.32034e-13	4.07003e-13	92.0577	0	30	161.941	117.771	100002	100001	100001
46.2	0	0	147.29	-1.23794e-13	3.59705e-13	92.0577	0	30	161.941	117.771	100002	100001	100001
46.25	0	0	147.29	-1.15553e-13	3.12407e-13	92.0577	0	30	161.941	117.771	100002	100001	100001
46.3	0	0	147.29	-1.07313e-13	2.65109e-13	92.0577	0	30	161.941	117.771	100002	100001	100001
46.35	0	0	147.29	-9.90726e-14	2.17811e-13	92.0577	0	30	161.941	117.771	100002	100001	100001
46.4	0	0	147.29	-9.08322e-14	1.70513e-13	92.0577	0	30	161.941	117.771	100002	100001	100001
46.45	0	0	147.29	-8.25919e-14	1.23215e-13	92.0577	0	30	161.941	117.771	100002	100001	100001
46.5	0	0	147.29	-7.49533e-14	8.16999e-14	92.0577	0	30	161.941	117.771	100002	100001	100001
46.55	0	0	147.29	-7.22017e-14	8.71445e-14	92.0577	0	30	161.941	117.771	100002	100001	100001
46.6	0	0	147.29	-6.945e-14	9.25891e-14	92.0577	0	30	161.941	117.771	100002	100001	100001
46.65	0	0	147.29	-6.66984e-14	9.80337e-14	92.0577	0	30	161.941	117.771	100002	100001	100001
46.7	0	0	147.29	-6.34779e-14	8.88061e-14	92.0577	0	30	161.941	117.771	100002	100001	100001
46.75	0	0	147.29	-6.02515e-14	7.93923e-14	92.0577	0	30	161.941	117.771	100002	100001	100001
46.8	0	0	147.29	-5.70251e-14	6.99785e-14	92.0577	0	30	161.941	117.771	100002	100001	100001
46.85	0	0	147.29	-5.63342e-14	7.44322e-14	92.0577	0	30	161.941	117.771	100002	100001	100001
46.9	0	0	147.29	-5.6038e-14	8.10448e-14	92.0577	0	30	161.941	117.771	100002	100001	100001
46.95	0	0	147.29	-5.57419e-14	8.76574e-14	92.0577	0	30	161.941	117.771	100002	100001	100001
47	0	0	147.29	-5.54457e-14	9.427e-14	92.0577	0	30	161.941	117.771	100002	100001	100001
47.05	0	0	147.29	-5.51495e-14	1.00883e-13	92.0577	0	30	161.941	117.771	100002	100001	100001
47.1	0	0	147.29	-5.48533e-14	1.07495e-13	92.0577	0	30	161.941	117.771	100002	100001	100001
47.15	0	0	147.29	-5.45572e-14	1.14108e-13	92.0577	0	30	161.941	117.771	100002	100001	100001
47.2	0	0	147.29	-5.4261e-14	1.2072e-13	92.0577	0	30	161.941	117.771	100002	100001	100001
47.25	0	0	147.29	-5.39648e-14	1.27333e-13	92.0577	0	30	161.941	117.771	100002	100001	100001
47.3	0	0	147.29	-5.36687e-14	1.33946e-13	92.0577	0	30	161.941	117.771	100002	100001	100001
47.35	0	0	147.29	-5.33725e-14	1.40558e-13	92.0577	0	30	161.941	117.771	100002	100001	100001
47.4	0	0	147.29	-5.30763e-14	1.47171e-13	92.0577	0	30	161.941	117.771	100002	100001	100001
47.45	0	0	147.29	-5.27801e-14	1.53783e-13	92.0577	0	30	161.941	117.771	100002	100001	100001
47.5	0	0	147.29	-5.2484e-14	1.60396e-13	92.0577	0	30	161.941	117.771	100002	100001	100001
47.55	0	0	147.29	-5.21878e-14	1.67009e-13	92.0577	0	30	161.941	117.771	100002	100001	100001
47.6	0	0	147.29	-5.18916e-14	1.73621e-13	92.0577	0	30	161.941	117.771	100002	100001	100001
47.65	0	0	147.29	-4.92041e-14	1.55346e-13	92.0577	0	30	161.941	117.771	100002	100001	100001
47.7	0	0	147.29	-4.64623e-14	1.36505e-13	92.0577	0	30	161.941	117.771	100002	100001	100001
47.75	0	0	147.29	-4.37205e-14	1.17664e-13	92.0577	0	30	161.941	117.771	100002	100001	100001
47.8	0	0	147.29	-4.09787e-14	9.88233e-14	92.0577	0	30	161.941	117.771	100002	100001	100001
47.85	0	0	147.29	-3.82369e-14	7.99825e-14	92.0577	0	30	161.941	117.771	100002	100001	100001
47.9	0	0	147.29	-3.54951e-14	6.11418e-14	92.0577	0	30	161.941	117.771	100002	100001	100001
47.95	0	0	147.29	-3.27533e-14	4.2301e-14	92.0577	0	30	161.941	117.771	100002	100001	100001
48	0	0	147.29	-3.00115e-14	2.34603e-14	92.0577	0	30	161.941	117.771	100002	100001	100001
48.05	0	0	147.29	-2.83037e-14	1.76164e-14	92.0577	0	30	161.941	117.771	100002	100001	100001

## Sheet: RI_BH4
Time	RI	FP	BH	fructose	formate	acetate	butyrate	unknown compound	H20	CO2	lag_RI	lag_FP	lag_BH
0.05	2.38658	0	0.238015	45.3999	1.07138	43.7006	2.02903	30	0.0581818	0.0933007	1.1121	0.112733	0.109544
0.1	2.41965	0	0.238749	45.3876	1.07097	43.6927	2.04649	30	0.0689113	0.110425	1.23677	0.127088	0.119998
0.15	2.45482	0	0.239547	45.3745	1.07053	43.6844	2.06506	30	0.0803395	0.128647	1.37542	0.143271	0.13145
0.2	2.49213	0	0.240415	45.3606	1.07006	43.6755	2.08476	30	0.092488	0.147997	1.52961	0.161514	0.143995
0.25	2.53163	0	0.241359	45.3458	1.06957	43.6661	2.10562	30	0.105377	0.168505	1.70109	0.182081	0.157737
0.3	2.57338	0	0.242384	45.3302	1.06905	43.6563	2.12765	30	0.119027	0.190195	1.89179	0.205266	0.172791
0.35	2.61739	0	0.243496	45.3138	1.0685	43.6459	2.1509	30	0.133455	0.213093	2.10387	0.231403	0.189282
0.4	2.66372	0	0.244702	45.2965	1.06792	43.6349	2.17536	30	0.14868	0.237221	2.33972	0.260869	0.207346
0.45	2.71239	0	0.246009	45.2782	1.06731	43.6235	2.20105	30	0.164718	0.2626	2.60201	0.294087	0.227134
0.5	2.76342	0	0.247425	45.2591	1.06667	43.6115	2.228	30	0.181585	0.28925	2.89371	0.331535	0.248811
0.55	2.81685	0	0.248956	45.2391	1.066	43.599	2.25621	30	0.199297	0.317187	3.21811	0.373751	0.272556
0.6	2.87268	0	0.250611	45.2181	1.0653	43.586	2.28569	30	0.217869	0.34643	3.57888	0.421343	0.298568
0.65	2.93095	0	0.252397	45.1962	1.06456	43.5724	2.31646	30	0.237315	0.376995	3.98008	0.474995	0.327062
0.7	2.99167	0	0.254325	45.1734	1.06379	43.5583	2.34852	30	0.257651	0.408896	4.42627	0.535479	0.358275
0.75	3.05486	0	0.256401	45.1496	1.063	43.5437	2.38188	30	0.278891	0.442151	4.92247	0.603664	0.392468
0.8	3.12053	0	0.258636	45.1248	1.06216	43.5286	2.41655	30	0.301051	0.476773	5.47431	0.680532	0.429923
0.85	3.1887	0	0.261039	45.0991	1.0613	43.5129	2.45254	30	0.324144	0.51278	6.088	0.767188	0.470953
0.9	3.25938	0	0.263618	45.0723	1.0604	43.4967	2.48987	30	0.348186	0.550185	6.77049	0.864878	0.515899
0.95	3.3326	0	0.266384	45.0446	1.05947	43.48	2.52852	30	0.373194	0.589006	7.5295	0.975007	0.565134
1	3.40836	0	0.269347	45.0159	1.0585	43.4628	2.56853	30	0.399182	0.629259	8.37359	1.09916	0.619068
1.05	3.4867	0	0.272515	44.9862	1.0575	43.4451	2.60989	30	0.426168	0.670961	9.31231	1.23912	0.67815
1.1	3.56762	0	0.275899	44.9554	1.05646	43.4268	2.65262	30	0.454168	0.714131	10.3563	1.39691	0.74287
1.15	3.65116	0	0.279509	44.9236	1.05538	43.4081	2.69673	30	0.4832	0.758788	11.5172	1.57478	0.813766
1.2	3.73734	0	0.283353	44.8908	1.05427	43.3888	2.74223	30	0.513282	0.804951	12.8084	1.77531	0.891429
1.25	3.82617	0	0.287442	44.8568	1.05313	43.369	2.78913	30	0.544431	0.852641	14.2443	2.00137	0.976503
1.3	3.9177	0	0.291786	44.8218	1.05194	43.3487	2.83746	30	0.576667	0.90188	15.8411	2.25621	1.0697
1.35	4.01195	0	0.296392	44.7858	1.05072	43.3279	2.88722	30	0.610009	0.95269	17.617	2.54351	1.17178
1.4	4.10896	0	0.30127	44.7486	1.04946	43.3066	2.93844	30	0.644476	1.00509	19.5919	2.86739	1.28361
1.45	4.20875	0	0.306429	44.7103	1.04816	43.2847	2.99113	30	0.680089	1.05912	21.7883	3.23251	1.40612
1.5	4.31137	0	0.311878	44.6708	1.04683	43.2624	3.04531	30	0.716868	1.11479	24.2308	3.64412	1.54031
1.55	4.41685	0	0.317625	44.6302	1.04545	43.2395	3.10101	30	0.754834	1.17212	26.9472	4.10815	1.68731
1.6	4.52524	0	0.323677	44.5884	1.04403	43.216	3.15824	30	0.794007	1.23116	29.9681	4.63126	1.84834
1.65	4.63657	0	0.330043	44.5454	1.04257	43.1921	3.21702	30	0.834411	1.29192	33.3277	5.22098	2.02474
1.7	4.7509	0	0.33673	44.5012	1.04107	43.1675	3.27739	30	0.876066	1.35444	37.0639	5.8858	2.21797
1.75	4.86828	0	0.343746	44.4558	1.03952	43.1425	3.33936	30	0.918996	1.41874	41.2189	6.63527	2.42965
1.8	4.98874	0	0.351098	44.4091	1.03793	43.1168	3.40297	30	0.963222	1.48485	45.8397	7.48018	2.66152
1.85	5.11235	0	0.358793	44.3611	1.0363	43.0906	3.46823	30	1.00877	1.55281	50.9786	8.43267	2.91553
1.9	5.23916	0	0.366837	44.3119	1.03462	43.0639	3.53519	30	1.05566	1.62265	56.6935	9.50645	3.19377
1.95	5.36922	0	0.375238	44.2613	1.0329	43.0365	3.60386	30	1.10392	1.6944	63.0491	10.717	3.49857
2	5.50259	0	0.384003	44.2094	1.03112	43.0086	3.67428	30	1.15357	1.7681	70.1172	12.0816	3.83246
2.05	5.63933	0	0.393137	44.1561	1.02931	42.98	3.74648	30	1.20464	1.84378	77.9777	13.62	4.19822
2.1	5.77951	0	0.402649	44.1014	1.02744	42.9508	3.82049	30	1.25716	1.92147	86.7193	15.3543	4.59888
2.15	5.92318	0	0.412543	44.0452	1.02552	42.921	3.89635	30	1.31114	2.00122	96.441	17.3095	5.03778
2.2	6.07041	0	0.422828	43.9877	1.02356	42.8906	3.97409	30	1.36662	2.08307	107.252	19.5136	5.51856
2.25	6.22126	0	0.433509	43.9286	1.02154	42.8595	4.05374	30	1.42363	2.16704	119.276	21.9984	6.04523
2.3	6.37581	0	0.444594	43.8681	1.01947	42.8278	4.13534	30	1.48219	2.25318	132.647	24.7995	6.62216
2.35	6.53413	0	0.456091	43.806	1.01735	42.7954	4.21893	30	1.54233	2.34154	147.518	27.9574	7.25415
2.4	6.69628	0	0.468005	43.7424	1.01517	42.7623	4.30455	30	1.60408	2.43214	164.055	31.5174	7.94646
2.45	6.86234	0	0.480344	43.6772	1.01294	42.7285	4.39223	30	1.66747	2.52504	182.446	35.5306	8.70483
2.5	7.03238	0	0.493117	43.6104	1.01066	42.694	4.48201	30	1.73253	2.62028	202.9	40.055	9.53559
2.55	7.20648	0	0.506331	43.5419	1.00831	42.6587	4.57393	30	1.7993	2.7179	225.646	45.1554	10.4456
2.6	7.38471	0	0.519993	43.4718	1.00591	42.6228	4.66804	30	1.8678	2.81795	250.941	50.9052	11.4425
2.65	7.56716	0	0.534112	43.3999	1.00345	42.5861	4.76437	30	1.93806	2.92047	279.073	57.3873	12.5345
2.7	7.7539	0	0.548697	43.3263	1.00093	42.5486	4.86297	30	2.01013	3.02551	310.359	64.6948	13.7308
2.75	7.94501	0	0.563757	43.2509	0.998352	42.5103	4.96388	30	2.08403	3.13311	345.151	72.9327	15.0412
2.8	8.14058	0	0.5793	43.1737	0.995708	42.4713	5.06714	30	2.1598	3.24333	383.844	82.2196	16.4767
2.85	8.34069	0	0.595336	43.0947	0.993001	42.4315	5.1728	30	2.23747	3.35622	426.875	92.6891	18.0491
2.9	8.54543	0	0.611874	43.0138	0.990229	42.3908	5.2809	30	2.31708	3.47181	474.73	104.492	19.7717
2.95	8.75487	0	0.628926	42.931	0.987392	42.3493	5.39148	30	2.39867	3.59017	527.949	117.797	21.6586
3	8.9691	0	0.646499	42.8462	0.984488	42.307	5.5046	30	2.48227	3.71135	587.134	132.797	23.7256
3.05	9.18821	0	0.664606	42.7595	0.981515	42.2638	5.62029	30	2.56792	3.83539	652.955	149.707	25.9899
3.1	9.4123	0	0.683257	42.6707	0.978473	42.2197	5.73861	30	2.65567	3.96236	726.154	168.77	28.4702
3.15	9.64144	0	0.702464	42.5799	0.975361	42.1748	5.85959	30	2.74553	4.09229	807.559	190.26	31.1873
3.2	9.87573	0	0.722237	42.487	0.972176	42.129	5.9833	30	2.83757	4.22525	898.091	214.487	34.1637
3.25	10.1153	0	0.742588	42.3919	0.968919	42.0822	6.10977	30	2.93182	4.3613	998.771	241.799	37.4241
3.3	10.3601	0	0.76353	42.2947	0.965587	42.0346	6.23905	30	3.02831	4.50048	1110.74	272.588	40.9958
3.35	10.6104	0	0.785074	42.1953	0.96218	41.986	6.37119	30	3.12709	4.64285	1235.26	307.298	44.9082
3.4	10.8662	0	0.807234	42.0936	0.958696	41.9364	6.50625	30	3.2282	4.78847	1373.73	346.428	49.1941
3.45	11.1276	0	0.830022	41.9897	0.955134	41.8859	6.64426	30	3.33168	4.93739	1527.74	390.541	53.889
3.5	11.3946	0	0.853451	41.8834	0.951492	41.8344	6.78528	30	3.43758	5.08968	1699	440.271	59.0319
3.55	11.6675	0	0.877535	41.7748	0.947769	41.7819	6.92935	30	3.54593	5.24538	1889.47	496.333	64.6656
3.6	11.9462	0	0.902288	41.6638	0.943965	41.7285	7.07653	30	3.65678	5.40455	2101.29	559.533	70.8371
3.65	12.231	0	0.927722	41.5503	0.940077	41.674	7.22686	30	3.77018	5.56726	2336.85	630.782	77.5975
3.7	12.5218	0	0.953854	41.4344	0.936105	41.6185	7.3804	30	3.88616	5.73356	2598.82	711.103	85.0031
3.75	12.8187	0	0.980696	41.3159	0.932046	41.562	7.53718	30	4.00477	5.9035	2890.16	801.652	93.1154
3.8	13.1219	0	1.00826	41.1949	0.927901	41.5044	7.69727	30	4.12605	6.07715	3214.16	903.731	102.002
3.85	13.4314	0	1.03657	41.0713	0.923667	41.4458	7.8607	30	4.25005	6.25456	3574.49	1018.81	111.737
3.9	13.7474	0	1.06564	40.9451	0.919344	41.3861	8.02753	30	4.3768	6.4358	3975.2	1148.54	122.4
3.95	14.0699	0	1.09547	40.8162	0.914929	41.3254	8.1978	30	4.50637	6.62091	4420.84	1294.79	134.082
4	14.3989	0	1.12609	40.6846	0.910422	41.2636	8.37156	30	4.63878	6.80995	4916.44	1459.66	146.878
4.05	14.7347	0	1.15752	40.5502	0.905822	41.2006	8.54886	30	4.77408	7.00299	5467.59	1645.53	160.895
4.1	15.0773	0	1.18976	40.413	0.901127	41.1366	8.72974	30	4.91233	7.20007	6080.54	1855.06	176.25
4.15	15.4268	0	1.22284	40.2731	0.896336	41.0715	8.91425	30	5.05355	7.40126	6762.19	2091.27	193.071
4.2	15.7832	0	1.25676	40.1302	0.891448	41.0053	9.10244	30	5.19779	7.6066	7520.26	2357.57	211.497
4.25	16.1466	0	1.29156	39.9845	0.886462	40.9379	9.29434	30	5.3451	7.81617	8363.32	2657.77	231.681
4.3	16.5172	0	1.32723	39.8358	0.881376	40.8695	9.49	30	5.49552	8.03	9300.89	2996.2	253.792
4.35	16.895	0	1.36381	39.6842	0.87619	40.7999	9.68947	30	5.64908	8.24815	10343.6	3377.72	278.013
4.4	17.2801	0	1.4013	39.5295	0.870903	40.7291	9.89279	30	5.80585	8.47068	11503.1	3807.83	304.545
4.45	17.6725	0	1.43973	39.3719	0.865512	40.6573	10.1	30	5.96584	8.69763	12792.7	4292.7	333.61
4.5	18.0723	0	1.4791	39.2111	0.860018	40.5843	10.3111	30	6.12911	8.92906	14226.8	4839.31	365.448
4.55	18.4797	0	1.51945	39.0472	0.85442	40.5101	10.5262	30	6.29569	9.16501	15821.7	5455.52	400.325
4.6	18.8946	0	1.56077	38.8802	0.848716	40.4348	10.7453	30	6.46563	9.40554	17595.4	6150.2	438.53
4.65	19.3172	0	1.6031	38.7101	0.842905	40.3584	10.9684	30	6.63896	9.65068	19567.9	6933.34	480.382
4.7	19.7475	0	1.64644	38.5367	0.836987	40.2808	11.1956	30	6.81572	9.90049	21761.5	7816.2	526.228
4.75	20.1855	0	1.69081	38.3601	0.830961	40.2021	11.4269	30	6.99594	10.155	24201.1	8811.49	576.449
4.8	20.6314	0	1.73624	38.1803	0.824826	40.1222	11.6623	30	7.17966	10.4143	26914.2	9933.5	631.463
4.85	21.0851	0	1.78273	37.9972	0.818581	40.0412	11.9018	30	7.36692	10.6783	29931.4	11198.4	691.727
4.9	21.5467	0	1.8303	37.8108	0.812226	39.9591	12.1456	30	7.55774	10.9472	33286.8	12624.3	757.742
4.95	22.0163	0	1.87898	37.621	0.805761	39.8758	12.3935	30	7.75216	11.2209	37018.4	14231.9	830.058
5	22.4939	0	1.92877	37.4279	0.799184	39.7914	12.6457	30	7.95021	11.4996	41168.4	16044.1	909.276
5.05	22.9796	0	1.97968	37.2315	0.792495	39.7059	12.9021	30	8.15191	11.7831	45783.5	18087.1	996.053
5.1	23.4733	0	2.03175	37.0317	0.785694	39.6193	13.1628	30	8.35729	12.0716	50916.1	20390.2	1091.11
5.15	23.9751	0	2.08497	36.8284	0.778781	39.5316	13.4278	30	8.56639	12.3651	56624	22986.6	1195.24
5.2	24.485	0	2.13937	36.6218	0.771755	39.4428	13.697	30	8.7792	12.6636	62971.8	25913.6	1309.31
5.25	25.0031	0	2.19497	36.4117	0.764616	39.3529	13.9705	30	8.99577	12.9671	70031.2	29213.3	1434.27
5.3	25.5293	0	2.25176	36.1982	0.757365	39.2619	14.2484	30	9.21611	13.2756	77882.1	32933.2	1571.15
5.35	26.0636	0	2.30978	35.9813	0.75	39.1699	14.5305	30	9.44024	13.5892	86613	37126.8	1721.09
5.4	26.6061	0	2.36902	35.761	0.742523	39.0768	14.817	30	9.66816	13.9079	96322.7	41854.3	1885.35
5.45	27.1568	0	2.42951	35.5371	0.734933	38.9828	15.1077	30	9.8999	14.2316	100000	47183.8	2065.28
5.5	27.7156	0	2.49126	35.3099	0.727231	38.8877	15.4027	30	10.1355	14.5604	100000	53191.7	2262.37
5.55	28.2825	0	2.55427	35.0792	0.719418	38.7916	15.7021	30	10.3748	14.8943	100000	59964.6	2478.28
5.6	28.8574	0	2.61857	34.845	0.711493	38.6946	16.0056	30	10.618	15.2332	100000	67600	2714.8
5.65	29.4405	0	2.68415	34.6075	0.703457	38.5966	16.3135	30	10.8651	15.5772	100000	76207.8	2973.88
5.7	30.0315	0	2.75103	34.3665	0.695312	38.4978	16.6255	30	11.116	15.9262	100000	85911.5	3257.69
5.75	30.6305	0	2.81922	34.1221	0.687057	38.398	16.9418	30	11.3707	16.2802	100000	96850.5	3568.59
5.8	31.2374	0	2.88872	33.8743	0.678694	38.2973	17.2623	30	11.6292	16.6393	100000	100000	3909.18
5.85	31.8521	0	2.95955	33.6231	0.670224	38.1958	17.5868	30	11.8915	17.0033	100000	100000	4282.25
5.9	32.4746	0	3.03171	33.3687	0.661648	38.0935	17.9155	30	12.1577	17.3723	100000	100000	4690.93
5.95	33.1048	0	3.1052	33.1108	0.652968	37.9903	18.2483	30	12.4276	17.7462	100000	100000	5138.61
6	33.7427	0	3.18003	32.8497	0.644184	37.8865	18.585	30	12.7012	18.125	100000	100000	5629.02
6.05	34.388	0	3.2562	32.5854	0.635299	37.7819	18.9258	30	12.9786	18.5086	100000	100000	6166.25
6.1	35.0407	0	3.33372	32.3178	0.626314	37.6765	19.2704	30	13.2597	18.8969	100000	100000	6754.74
6.15	35.7008	0	3.41259	32.0471	0.617231	37.5706	19.6189	30	13.5445	19.29	100000	100000	7399.38
6.2	36.368	0	3.4928	31.7732	0.608052	37.464	19.9712	30	13.8329	19.6878	100000	100000	8105.53
6.25	37.0422	0	3.57436	31.4962	0.598779	37.3568	20.3272	30	14.1249	20.0902	100000	100000	8879.08
6.3	37.7234	0	3.65726	31.2162	0.589414	37.2491	20.6869	30	14.4204	20.4971	100000	100000	9726.44
6.35	38.4114	0	3.7415	30.9332	0.579959	37.1408	21.0501	30	14.7195	20.9085	100000	100000	10654.7
6.4	39.1059	0	3.82708	30.6473	0.570417	37.0321	21.4169	30	15.022	21.3242	100000	100000	11671.5
6.45	39.807	0	3.91399	30.3585	0.560791	36.9229	21.787	30	15.3279	21.7443	100000	100000	12785.4
6.5	40.5143	0	4.00221	30.0669	0.551083	36.8133	22.1605	30	15.6371	22.1685	100000	100000	14005.5
6.55	41.2277	0	4.09176	29.7725	0.541297	36.7034	22.5371	30	15.9496	22.5969	100000	100000	15342.2
6.6	41.947	0	4.1826	29.4756	0.531434	36.5932	22.9169	30	16.2654	23.0292	100000	100000	16806.4
6.65	42.6721	0	4.27474	29.176	0.521499	36.4827	23.2998	30	16.5842	23.4654	100000	100000	18410.3
6.7	43.4027	0	4.36815	28.8739	0.511494	36.3719	23.6855	30	16.9062	23.9055	100000	100000	20167.2
6.75	44.1385	0	4.46283	28.5694	0.501424	36.261	24.0741	30	17.2311	24.3491	100000	100000	22091.9
6.8	44.8795	0	4.55876	28.2626	0.491291	36.15	24.4653	30	17.5589	24.7964	100000	100000	24200.2
6.85	45.6253	0	4.65592	27.9535	0.481098	36.0389	24.8591	30	17.8895	25.247	100000	100000	26509.7
6.9	46.3758	0	4.75429	27.6423	0.470851	35.9277	25.2553	30	18.2228	25.7009	100000	100000	29039.6
6.95	47.1306	0	4.85384	27.329	0.460552	35.8166	25.6539	30	18.5588	26.158	100000	100000	31810.9
7	47.8895	0	4.95457	27.0137	0.450206	35.7055	26.0546	30	18.8973	26.618	100000	100000	34846.7
7.05	48.6524	0	5.05644	26.6966	0.439817	35.5945	26.4574	30	19.2382	27.0809	100000	100000	38172.3
7.1	49.4188	0	5.15942	26.3778	0.429388	35.4836	26.862	30	19.5814	27.5465	100000	100000	41815.2
7.15	50.1886	0	5.2635	26.0573	0.418925	35.373	27.2685	30	19.9268	28.0147	100000	100000	45805.8
7.2	50.9614	0	5.36864	25.7353	0.408431	35.2626	27.6765	30	20.2743	28.4852	100000	100000	50177.2
7.25	51.737	0	5.47481	25.4118	0.397911	35.1525	28.086	30	20.6238	28.9579	100000	100000	54965.7
7.3	52.5151	0	5.58198	25.0871	0.38737	35.0427	28.4969	30	20.9751	29.4327	100000	100000	60211.3
7.35	53.2954	0	5.69012	24.7612	0.376812	34.9333	28.9089	30	21.3281	29.9094	100000	100000	65957.5
7.4	54.0776	0	5.79919	24.4342	0.366241	34.8244	29.3219	30	21.6828	30.3878	100000	100000	72252
7.45	54.8614	0	5.90915	24.1063	0.355663	34.7159	29.7357	30	22.0389	30.8676	100000	100000	79147.3
7.5	55.6465	0	6.01997	23.7776	0.345083	34.608	30.1503	30	22.3963	31.3488	100000	100000	86700.6
7.55	56.4326	0	6.13161	23.4482	0.334504	34.5006	30.5653	30	22.755	31.8312	100000	100000	94974.7
7.6	57.2194	0	6.24402	23.1183	0.323932	34.3938	30.9808	30	23.1146	32.3145	100000	100000	100001
7.65	58.0066	0	6.35717	22.7879	0.313373	34.2877	31.3964	30	23.4752	32.7986	100000	100000	100001
7.7	58.7937	0	6.47101	22.4573	0.30283	34.1823	31.812	30	23.8366	33.2833	100000	100000	100001
7.75	59.5806	0	6.58549	22.1265	0.29231	34.0777	32.2275	30	24.1986	33.7683	100000	100000	100001
7.8	60.367	0	6.70058	21.7956	0.281816	33.9738	32.6427	30	24.5611	34.2536	100000	100000	100001
7.85	61.1524	0	6.81622	21.4649	0.271353	33.8708	33.0574	30	24.924	34.7388	100000	100000	100001
7.9	61.9367	0	6.93237	21.1344	0.260927	33.7686	33.4715	30	25.287	35.2238	100000	100000	100001
7.95	62.7194	0	7.04898	20.8043	0.250543	33.6673	33.8847	30	25.6501	35.7085	100000	100000	100001
8	63.5003	0	7.166	20.4747	0.240204	33.5669	34.297	30	26.0131	36.1925	100000	100000	100001
8.05	64.279	0	7.28337	20.1457	0.229918	33.4676	34.7082	30	26.3758	36.6758	100000	100000	100001
8.1	65.0552	0	7.40105	19.8175	0.219687	33.3692	35.118	30	26.7381	37.158	100000	100000	100001
8.15	65.8286	0	7.51898	19.4903	0.209517	33.2718	35.5264	30	27.0999	37.6391	100000	100000	100001
8.2	66.599	0	7.63712	19.164	0.199413	33.1756	35.9332	30	27.4609	38.1188	100000	100000	100001
8.25	67.3659	0	7.75541	18.839	0.189379	33.0804	36.3381	30	27.8211	38.5969	100000	100000	100001
8.3	68.1292	0	7.87379	18.5152	0.17942	32.9863	36.7411	30	28.1803	39.0732	100000	100000	100001
8.35	68.8885	0	7.99221	18.1929	0.16954	32.8934	37.142	30	28.5384	39.5476	100000	100000	100001
8.4	69.6435	0	8.11062	17.8721	0.159745	32.8017	37.5407	30	28.8951	40.0198	100000	100000	100001
8.45	70.3939	0	8.22897	17.553	0.150037	32.7112	37.9369	30	29.2504	40.4897	100000	100000	100001
8.5	71.1395	0	8.3472	17.2358	0.140422	32.6219	38.3306	30	29.6042	40.9571	100000	100000	100001
8.55	71.88	0	8.46525	16.9204	0.130903	32.5339	38.7215	30	29.9562	41.4218	100000	100000	100001
8.6	72.6151	0	8.58308	16.6071	0.121485	32.4471	39.1097	30	30.3063	41.8836	100000	100000	100001
8.65	73.3446	0	8.70063	16.2959	0.112171	32.3616	39.4948	30	30.6544	42.3424	100000	100000	100001
8.7	74.0681	0	8.81784	15.987	0.102965	32.2773	39.8769	30	31.0005	42.7979	100000	100000	100001
8.75	74.7856	0	8.93466	15.6805	0.0938703	32.1944	40.2557	30	31.3442	43.2501	100000	100000	100001
8.8	75.4967	0	9.05105	15.3764	0.084891	32.1128	40.6312	30	31.6856	43.6988	100000	100000	100001
8.85	76.2012	0	9.16695	15.075	0.0760299	32.0326	41.0032	30	32.0244	44.1438	100000	100000	100001
8.9	76.8989	0	9.28231	14.7762	0.0672904	31.9536	41.3716	30	32.3606	44.5849	100000	100000	100001
8.95	77.5896	0	9.39707	14.4802	0.0586755	31.876	41.7362	30	32.6941	45.0221	100000	100000	100001
9	78.2731	0	9.5112	14.187	0.0501879	31.7998	42.0971	30	33.0247	45.4551	100000	100000	100001
9.05	78.9492	0	9.62464	13.8969	0.0418304	31.7249	42.4541	30	33.3523	45.8839	100000	100000	100001
9.1	79.6178	0	9.73735	13.6097	0.0336055	31.6513	42.8071	30	33.6768	46.3084	100000	100000	100001
9.15	80.2785	0	9.84928	13.3257	0.0255156	31.5792	43.156	30	33.9982	46.7283	100000	100000	100001
9.2	80.9314	0	9.96038	13.0448	0.017563	31.5083	43.5007	30	34.3162	47.1436	100000	100000	100001
9.25	81.5762	0	10.0706	12.7672	0.00974962	31.4388	43.8411	30	34.6309	47.5542	100000	100000	100001
9.3	82.2128	0	10.1799	12.493	0.0020774	31.3707	44.1773	30	34.9422	47.9599	100000	100000	100001
9.35	82.841	0	10.2883	12.2222	-0.00545194	31.304	44.509	30	35.2499	48.3608	100000	100000	100001
9.4	83.4608	0	10.3957	11.9548	-0.0128369	31.2385	44.8362	30	35.5539	48.7566	100000	100000	100001
9.45	84.072	0	10.5021	11.6909	-0.020076	31.1744	45.159	30	35.8543	49.1473	100000	100000	100001
9.5	84.6746	0	10.6074	11.4306	-0.0271682	31.1117	45.4771	30	36.1509	49.5328	100000	100000	100001
9.55	85.2684	0	10.7116	11.1739	-0.0341124	31.0502	45.7906	30	36.4437	49.9131	100000	100000	100001
9.6	85.8534	0	10.8147	10.9208	-0.0409077	30.9901	46.0995	30	36.7325	50.288	100000	100000	100001
9.65	86.4294	0	10.9166	10.6714	-0.0475533	30.9312	46.4037	30	37.0175	50.6576	100000	100000	100001
9.7	86.9965	0	11.0173	10.4258	-0.0540488	30.8737	46.7031	30	37.2984	51.0217	100000	100000	100001
9.75	87.5546	0	11.1168	10.1839	-0.0603936	30.8174	46.9977	30	37.5753	51.3803	100000	100000	100001
9.8	88.1035	0	11.2151	9.94577	-0.0665876	30.7624	47.2876	30	37.8481	51.7335	100000	100000	100001
9.85	88.6434	0	11.3121	9.71145	-0.0726306	30.7086	47.5726	30	38.1167	52.081	100000	100000	100001
9.9	89.1742	0	11.4078	9.48095	-0.0785226	30.6561	47.8529	30	38.3813	52.423	100000	100000	100001
9.95	89.6958	0	11.5022	9.25428	-0.0842639	30.6048	48.1283	30	38.6416	52.7593	100000	100000	100001
10	90.2082	0	11.5953	9.03145	-0.0898547	30.5547	48.3989	30	38.8977	53.09	100000	100000	100001
10.05	90.7115	0	11.6871	8.81248	-0.0952954	30.5057	48.6646	30	39.1496	53.415	100000	100000	100001
10.1	91.2056	0	11.7775	8.59736	-0.100587	30.458	48.9255	30	39.3973	53.7344	100000	100000	100001
10.15	91.6907	0	11.8665	8.38608	-0.105729	30.4114	49.1816	30	39.6407	54.0481	100000	100000	100001
10.2	92.1666	0	11.9541	8.17866	-0.110724	30.3659	49.4329	30	39.8798	54.3561	100000	100000	100001
10.25	92.6334	0	12.0403	7.97508	-0.115572	30.3216	49.6793	30	40.1147	54.6585	100000	100000	100001
10.3	93.0912	0	12.1251	7.77534	-0.120274	30.2783	49.921	30	40.3454	54.9553	100000	100000	100001
10.35	93.5399	0	12.2085	7.57941	-0.124831	30.2362	50.158	30	40.5717	55.2464	100000	100000	100001
10.4	93.9798	0	12.2905	7.38728	-0.129244	30.195	50.3902	30	40.7939	55.5319	100000	100000	100001
10.45	94.4107	0	12.3711	7.19894	-0.133516	30.155	50.6178	30	41.0118	55.8118	100000	100000	100001
10.5	94.8329	0	12.4502	7.01436	-0.137647	30.1159	50.8407	30	41.2255	56.0862	100000	100000	100001
10.55	95.2462	0	12.5279	6.83351	-0.141638	30.0779	51.0589	30	41.4349	56.355	100000	100000	100001
10.6	95.6509	0	12.6042	6.65638	-0.145492	30.0408	51.2726	30	41.6403	56.6184	100000	100000	100001
10.65	96.047	0	12.679	6.48292	-0.14921	30.0048	51.4817	30	41.8414	56.8763	100000	100000	100001
10.7	96.4346	0	12.7525	6.31312	-0.152794	29.9696	51.6864	30	42.0385	57.1289	100000	100000	100001
10.75	96.8137	0	12.8245	6.14693	-0.156246	29.9354	51.8865	30	42.2314	57.376	100000	100000	100001
10.8	97.1845	0	12.8951	5.98433	-0.159568	29.9021	52.0823	30	42.4203	57.6179	100000	100000	100001
10.85	97.547	0	12.9643	5.82527	-0.16276	29.8697	52.2737	30	42.6052	57.8545	100000	100000	100001
10.9	97.9014	0	13.032	5.66971	-0.165827	29.8381	52.4609	30	42.7861	58.086	100000	100000	100001
10.95	98.2478	0	13.0984	5.51762	-0.168769	29.8074	52.6437	30	42.963	58.3123	100000	100000	100001
11	98.5862	0	13.1635	5.36896	-0.171588	29.7775	52.8224	30	43.1361	58.5335	100000	100000	100001
11.05	98.9168	0	13.2271	5.22368	-0.174287	29.7485	52.997	30	43.3052	58.7497	100000	100000	100001
11.1	99.2396	0	13.2894	5.08173	-0.176868	29.7202	53.1674	30	43.4706	58.9609	100000	100000	100001
11.15	99.5549	0	13.3503	4.94308	-0.179333	29.6927	53.3339	30	43.6322	59.1673	100000	100000	100001
11.2	99.8626	0	13.4099	4.80766	-0.181684	29.666	53.4964	30	43.7901	59.3688	100000	100000	100001
11.25	100.163	0	13.4682	4.67545	-0.183924	29.64	53.655	30	43.9443	59.5657	100000	100000	100001
11.3	100.456	0	13.5252	4.54639	-0.186054	29.6147	53.8097	30	44.0949	59.7578	100000	100000	100001
11.35	100.742	0	13.5808	4.42042	-0.188077	29.5901	53.9607	30	44.2419	59.9453	100000	100000	100001
11.4	101.021	0	13.6352	4.29751	-0.189995	29.5662	54.108	30	44.3855	60.1283	100000	100000	100001
11.45	101.293	0	13.6884	4.17759	-0.191811	29.543	54.2516	30	44.5255	60.3068	100000	100000	100001
11.5	101.558	0	13.7403	4.06063	-0.193526	29.5204	54.3917	30	44.6622	60.4809	100000	100000	100001
11.55	101.817	0	13.7909	3.94656	-0.195143	29.4985	54.5282	30	44.7955	60.6508	100000	100000	100001
11.6	102.069	0	13.8404	3.83534	-0.196664	29.4772	54.6613	30	44.9255	60.8164	100000	100000	100001
11.65	102.315	0	13.8887	3.72692	-0.198091	29.4565	54.791	30	45.0523	60.9778	100000	100000	100001
11.7	102.554	0	13.9357	3.62124	-0.199427	29.4363	54.9174	30	45.1759	61.1352	100000	100000	100001
11.75	102.787	0	13.9817	3.51825	-0.200674	29.4168	55.0405	30	45.2964	61.2885	100000	100000	100001
11.8	103.014	0	14.0265	3.4179	-0.201834	29.3978	55.1604	30	45.4138	61.4379	100000	100000	100001
11.85	103.235	0	14.0701	3.32014	-0.202909	29.3793	55.2773	30	45.5282	61.5835	100000	100000	100001
11.9	103.451	0	14.1127	3.22491	-0.203902	29.3614	55.391	30	45.6397	61.7252	100000	100000	100001
11.95	103.661	0	14.1542	3.13218	-0.204814	29.344	55.5017	30	45.7482	61.8633	100000	100000	100001
12	103.865	0	14.1946	3.04187	-0.205648	29.3271	55.6096	30	45.854	61.9977	100000	100000	100001
12.05	104.064	0	14.234	2.95395	-0.206406	29.3106	55.7145	30	45.9569	62.1286	100000	100000	100001
12.1	104.257	0	14.2724	2.86836	-0.20709	29.2947	55.8166	30	46.0572	62.256	100000	100000	100001
12.15	104.445	0	14.3098	2.78506	-0.207702	29.2792	55.916	30	46.1547	62.3801	100000	100000	100001
12.2	104.628	0	14.3462	2.70399	-0.208244	29.2641	56.0127	30	46.2497	62.5007	100000	100000	100001
12.25	104.807	0	14.3816	2.6251	-0.208719	29.2495	56.1068	30	46.3421	62.6182	100000	100000	100001
12.3	104.98	0	14.4161	2.54834	-0.209127	29.2353	56.1983	30	46.432	62.7324	100000	100000	100001
12.35	105.148	0	14.4496	2.47368	-0.209471	29.2216	56.2873	30	46.5195	62.8435	100000	100000	100001
12.4	105.312	0	14.4823	2.40105	-0.209754	29.2082	56.3738	30	46.6046	62.9516	100000	100000	100001
12.45	105.472	0	14.5141	2.33041	-0.209976	29.1952	56.458	30	46.6874	63.0567	100000	100000	100001
12.5	105.627	0	14.545	2.26172	-0.21014	29.1826	56.5398	30	46.7679	63.1589	100000	100000	100001
12.55	105.777	0	14.575	2.19493	-0.210247	29.1703	56.6193	30	46.8461	63.2583	100000	100000	100001
12.6	105.924	0	14.6042	2.12999	-0.2103	29.1584	56.6967	30	46.9222	63.3549	100000	100000	100001
12.65	106.066	0	14.6327	2.06687	-0.2103	29.1469	56.7718	30	46.9961	63.4488	100000	100000	100001
12.7	106.204	0	14.6603	2.0055	-0.210249	29.1357	56.8449	30	47.068	63.54	100000	100000	100001
12.75	106.339	0	14.6871	1.94586	-0.210149	29.1248	56.9158	30	47.1379	63.6287	100000	100000	100001
12.8	106.469	0	14.7132	1.8879	-0.21	29.1142	56.9848	30	47.2058	63.7149	100000	100000	100001
12.85	106.596	0	14.7386	1.83158	-0.209806	29.104	57.0518	30	47.2717	63.7987	100000	100000	100001
12.9	106.72	0	14.7632	1.77685	-0.209567	29.094	57.1169	30	47.3358	63.88	100000	100000	100001
12.95	106.839	0	14.7872	1.72368	-0.209285	29.0843	57.1801	30	47.3981	63.959	100000	100000	100001
13	106.956	0	14.8104	1.67203	-0.208962	29.0749	57.2416	30	47.4586	64.0358	100000	100000	100001
13.05	107.069	0	14.833	1.62186	-0.208598	29.0658	57.3012	30	47.5173	64.1104	100000	100000	100001
13.1	107.178	0	14.8549	1.57312	-0.208196	29.057	57.3591	30	47.5743	64.1828	100000	100000	100001
13.15	107.285	0	14.8762	1.52579	-0.207757	29.0484	57.4154	30	47.6297	64.2531	100000	100000	100001
13.2	107.388	0	14.8969	1.47982	-0.207283	29.04	57.47	30	47.6835	64.3213	100000	100000	100001
13.25	107.489	0	14.9169	1.43518	-0.206774	29.0319	57.5231	30	47.7357	64.3876	100000	100000	100001
13.3	107.586	0	14.9364	1.39184	-0.206232	29.0241	57.5746	30	47.7864	64.452	100000	100000	100001
13.35	107.681	0	14.9553	1.34976	-0.205658	29.0164	57.6246	30	47.8356	64.5144	100000	100000	100001
13.4	107.773	0	14.9736	1.3089	-0.205054	29.009	57.6731	30	47.8833	64.5751	100000	100000	100001
13.45	107.862	0	14.9914	1.26923	-0.20442	29.0018	57.7202	30	47.9297	64.6339	100000	100000	100001
13.5	107.949	0	15.0087	1.23073	-0.203759	28.9949	57.7659	30	47.9746	64.691	100000	100000	100001
13.55	108.033	0	15.0254	1.19336	-0.20307	28.9881	57.8103	30	48.0183	64.7465	100000	100000	100001
13.6	108.115	0	15.0417	1.15708	-0.202356	28.9815	57.8534	30	48.0606	64.8002	100000	100000	100001
13.65	108.194	0	15.0575	1.12188	-0.201617	28.9751	57.8952	30	48.1017	64.8524	100000	100000	100001
13.7	108.271	0	15.0727	1.08771	-0.200855	28.9689	57.9358	30	48.1416	64.9031	100000	100000	100001
13.75	108.345	0	15.0876	1.05455	-0.20007	28.9628	57.9751	30	48.1802	64.9522	100000	100000	100001
13.8	108.417	0	15.1019	1.02238	-0.199263	28.957	58.0133	30	48.2177	64.9998	100000	100000	100001
13.85	108.488	0	15.1158	0.991157	-0.198436	28.9513	58.0504	30	48.2541	65.0461	100000	100000	100001
13.9	108.556	0	15.1294	0.960866	-0.19759	28.9458	58.0863	30	48.2894	65.0909	100000	100000	100001
13.95	108.622	0	15.1424	0.931476	-0.196725	28.9404	58.1212	30	48.3236	65.1344	100000	100000	100001
14	108.686	0	15.1551	0.902963	-0.195842	28.9352	58.155	30	48.3568	65.1766	100000	100000	100001
14.05	108.748	0	15.1674	0.875302	-0.194942	28.9302	58.1878	30	48.3889	65.2175	100000	100000	100001
14.1	108.808	0	15.1793	0.848468	-0.194026	28.9252	58.2197	30	48.4201	65.2572	100000	100000	100001
14.15	108.867	0	15.1909	0.822439	-0.193095	28.9205	58.2505	30	48.4504	65.2957	100000	100000	100001
14.2	108.923	0	15.2021	0.797191	-0.192149	28.9158	58.2805	30	48.4797	65.333	100000	100000	100001
14.25	108.978	0	15.2129	0.772701	-0.19119	28.9113	58.3095	30	48.5081	65.3691	100000	100000	100001
14.3	109.032	0	15.2234	0.748948	-0.190218	28.907	58.3377	30	48.5357	65.4042	100000	100000	100001
14.35	109.084	0	15.2336	0.725911	-0.189234	28.9027	58.365	30	48.5624	65.4382	100000	100000	100001
14.4	109.134	0	15.2434	0.703569	-0.188238	28.8986	58.3915	30	48.5883	65.4712	100000	100000	100001
14.45	109.182	0	15.2529	0.681902	-0.187232	28.8946	58.4172	30	48.6133	65.5031	100000	100000	100001
14.5	109.23	0	15.2622	0.66089	-0.186215	28.8907	58.4421	30	48.6376	65.5341	100000	100000	100001
14.55	109.275	0	15.2711	0.640514	-0.185189	28.8869	58.4663	30	48.6612	65.5642	100000	100000	100001
14.6	109.32	0	15.2798	0.620756	-0.184155	28.8832	58.4897	30	48.684	65.5933	100000	100000	100001
14.65	109.363	0	15.2881	0.601598	-0.183112	28.8797	58.5124	30	48.7062	65.6215	100000	100000	100001
14.7	109.404	0	15.2963	0.583021	-0.182061	28.8762	58.5344	30	48.7276	65.6488	100000	100000	100001
14.75	109.445	0	15.3041	0.565009	-0.181003	28.8728	58.5558	30	48.7484	65.6753	100000	100000	100001
14.8	109.484	0	15.3117	0.547546	-0.179939	28.8695	58.5765	30	48.7685	65.701	100000	100000	100001
14.85	109.522	0	15.3191	0.530614	-0.178869	28.8664	58.5966	30	48.788	65.7259	100000	100000	100001
14.9	109.559	0	15.3262	0.514199	-0.177793	28.8633	58.616	30	48.8069	65.75	100000	100000	100001
14.95	109.595	0	15.3331	0.498284	-0.176712	28.8602	58.6349	30	48.8251	65.7734	100000	100000	100001
15	109.629	0	15.3397	0.482856	-0.175627	28.8573	58.6532	30	48.8429	65.796	100000	100000	100001
15.05	109.663	0	15.3462	0.4679	-0.174537	28.8545	58.6709	30	48.86	65.8179	100000	100000	100001
15.1	109.695	0	15.3524	0.453401	-0.173444	28.8517	58.6881	30	48.8766	65.8392	100000	100000	100001
15.15	109.727	0	15.3584	0.439346	-0.172348	28.849	58.7047	30	48.8927	65.8598	100000	100000	100001
15.2	109.757	0	15.3642	0.425722	-0.171249	28.8464	58.7209	30	48.9083	65.8797	100000	100000	100001
15.25	109.787	0	15.3699	0.412516	-0.170147	28.8439	58.7365	30	48.9234	65.8991	100000	100000	100001
15.3	109.816	0	15.3753	0.399715	-0.169044	28.8414	58.7517	30	48.938	65.9178	100000	100000	100001
15.35	109.844	0	15.3806	0.387307	-0.167939	28.839	58.7664	30	48.9522	65.9359	100000	100000	100001
15.4	109.871	0	15.3857	0.37528	-0.166832	28.8367	58.7806	30	48.9659	65.9535	100000	100000	100001
15.45	109.897	0	15.3906	0.363623	-0.165724	28.8344	58.7944	30	48.9791	65.9705	100000	100000	100001
15.5	109.922	0	15.3954	0.352325	-0.164616	28.8322	58.8078	30	48.992	65.987	100000	100000	100001
15.55	109.947	0	15.4	0.341375	-0.163508	28.83	58.8208	30	49.0044	66.003	100000	100000	100001
15.6	109.971	0	15.4044	0.330762	-0.162399	28.828	58.8334	30	49.0165	66.0184	100000	100000	100001
15.65	109.994	0	15.4087	0.320476	-0.161291	28.8259	58.8456	30	49.0281	66.0334	100000	100000	100001
15.7	110.016	0	15.4129	0.310507	-0.160184	28.8239	58.8574	30	49.0394	66.0479	100000	100000	100001
15.75	110.038	0	15.4169	0.300846	-0.159077	28.822	58.8688	30	49.0503	66.062	100000	100000	100001
15.8	110.059	0	15.4208	0.291483	-0.157971	28.8201	58.8799	30	49.0609	66.0756	100000	100000	100001
15.85	110.079	0	15.4245	0.282409	-0.156867	28.8183	58.8907	30	49.0711	66.0887	100000	100000	100001
15.9	110.099	0	15.4281	0.273616	-0.155764	28.8165	58.9011	30	49.081	66.1015	100000	100000	100001
15.95	110.118	0	15.4316	0.265094	-0.154663	28.8148	58.9112	30	49.0905	66.1138	100000	100000	100001
16	110.136	0	15.435	0.256836	-0.153564	28.8131	58.9209	30	49.0998	66.1258	100000	100000	100001
16.05	110.154	0	15.4382	0.248834	-0.152467	28.8115	58.9304	30	49.1088	66.1374	100000	100000	100001
16.1	110.172	0	15.4414	0.241079	-0.151373	28.8099	58.9396	30	49.1174	66.1486	100000	100000	100001
16.15	110.189	0	15.4444	0.233565	-0.150282	28.8084	58.9485	30	49.1258	66.1594	100000	100000	100001
16.2	110.205	0	15.4473	0.226283	-0.149193	28.8069	58.9571	30	49.1339	66.17	100000	100000	100001
16.25	110.221	0	15.4502	0.219227	-0.148107	28.8054	58.9655	30	49.1418	66.1801	100000	100000	100001
16.3	110.236	0	15.4529	0.21239	-0.147025	28.8039	58.9736	30	49.1494	66.19	100000	100000	100001
16.35	110.251	0	15.4555	0.205765	-0.145945	28.8026	58.9814	30	49.1567	66.1995	100000	100000	100001
16.4	110.265	0	15.458	0.199346	-0.14487	28.8012	58.989	30	49.1638	66.2087	100000	100000	100001
16.45	110.279	0	15.4605	0.193125	-0.143798	28.7999	58.9964	30	49.1707	66.2177	100000	100000	100001
16.5	110.293	0	15.4628	0.187098	-0.14273	28.7986	59.0035	30	49.1774	66.2263	100000	100000	100001
16.55	110.306	0	15.4651	0.181258	-0.141665	28.7973	59.0105	30	49.1838	66.2347	100000	100000	100001
16.6	110.319	0	15.4673	0.1756	-0.140605	28.7961	59.0172	30	49.19	66.2428	100000	100000	100001
16.65	110.331	0	15.4694	0.170118	-0.139549	28.7949	59.0237	30	49.196	66.2506	100000	100000	100001
16.7	110.343	0	15.4714	0.164805	-0.138497	28.7937	59.0299	30	49.2018	66.2582	100000	100000	100001
16.75	110.354	0	15.4734	0.159659	-0.13745	28.7926	59.036	30	49.2074	66.2655	100000	100000	100001
16.8	110.366	0	15.4753	0.154672	-0.136407	28.7915	59.0419	30	49.2129	66.2726	100000	100000	100001
16.85	110.376	0	15.4771	0.14984	-0.135369	28.7904	59.0477	30	49.2181	66.2795	100000	100000	100001
16.9	110.387	0	15.4788	0.145159	-0.134336	28.7894	59.0532	30	49.2232	66.2861	100000	100000	100001
16.95	110.397	0	15.4805	0.140623	-0.133307	28.7884	59.0586	30	49.2281	66.2926	100000	100000	100001
17	110.407	0	15.4822	0.136229	-0.132284	28.7874	59.0638	30	49.2328	66.2988	100000	100000	100001
17.05	110.416	0	15.4837	0.131971	-0.131265	28.7864	59.0688	30	49.2374	66.3048	100000	100000	100001
17.1	110.426	0	15.4852	0.127846	-0.130251	28.7854	59.0737	30	49.2418	66.3106	100000	100000	100001
17.15	110.435	0	15.4867	0.12385	-0.129243	28.7845	59.0784	30	49.2461	66.3163	100000	100000	100001
17.2	110.443	0	15.488	0.119978	-0.128239	28.7836	59.083	30	49.2503	66.3217	100000	100000	100001
17.25	110.452	0	15.4894	0.116227	-0.127241	28.7827	59.0875	30	49.2542	66.327	100000	100000	100001
17.3	110.46	0	15.4907	0.112593	-0.126249	28.7819	59.0918	30	49.2581	66.3321	100000	100000	100001
17.35	110.468	0	15.4919	0.109072	-0.125261	28.781	59.0959	30	49.2618	66.337	100000	100000	100001
17.4	110.476	0	15.4931	0.10566	-0.124279	28.7802	59.1	30	49.2654	66.3418	100000	100000	100001
17.45	110.483	0	15.4942	0.102356	-0.123303	28.7794	59.1039	30	49.2689	66.3464	100000	100000	100001
17.5	110.49	0	15.4953	0.0991542	-0.122332	28.7786	59.1077	30	49.2723	66.3509	100000	100000	100001
17.55	110.497	0	15.4964	0.0960525	-0.121367	28.7778	59.1114	30	49.2755	66.3552	100000	100000	100001
17.6	110.504	0	15.4974	0.0930475	-0.120407	28.7771	59.1149	30	49.2786	66.3594	100000	100000	100001
17.65	110.51	0	15.4983	0.0901364	-0.119453	28.7764	59.1184	30	49.2816	66.3634	100000	100000	100001
17.7	110.517	0	15.4992	0.0873161	-0.118505	28.7757	59.1217	30	49.2846	66.3673	100000	100000	100001
17.75	110.523	0	15.5001	0.0845839	-0.117562	28.775	59.1249	30	49.2874	66.3711	100000	100000	100001
17.8	110.529	0	15.501	0.0819371	-0.116625	28.7743	59.1281	30	49.2901	66.3747	100000	100000	100001
17.85	110.534	0	15.5018	0.0793729	-0.115694	28.7736	59.1311	30	49.2927	66.3783	100000	100000	100001
17.9	110.54	0	15.5026	0.0768887	-0.114769	28.773	59.134	30	49.2952	66.3817	100000	100000	100001
17.95	110.545	0	15.5033	0.0744822	-0.113849	28.7723	59.1369	30	49.2977	66.385	100000	100000	100001
18	110.551	0	15.504	0.0721509	-0.112936	28.7717	59.1397	30	49.3	66.3882	100000	100000	100001
18.05	110.556	0	15.5047	0.0698924	-0.112028	28.7711	59.1423	30	49.3023	66.3912	100000	100000	100001
18.1	110.561	0	15.5054	0.0677045	-0.111126	28.7705	59.1449	30	49.3045	66.3942	100000	100000	100001
18.15	110.565	0	15.506	0.065585	-0.110229	28.7699	59.1474	30	49.3066	66.3971	100000	100000	100001
18.2	110.57	0	15.5066	0.0635317	-0.109339	28.7694	59.1499	30	49.3086	66.3999	100000	100000	100001
18.25	110.574	0	15.5072	0.0615425	-0.108455	28.7688	59.1522	30	49.3106	66.4025	100000	100000	100001
18.3	110.579	0	15.5077	0.0596157	-0.107576	28.7683	59.1545	30	49.3125	66.4051	100000	100000	100001
18.35	110.583	0	15.5082	0.057749	-0.106704	28.7677	59.1567	30	49.3143	66.4076	100000	100000	100001
18.4	110.587	0	15.5087	0.0559407	-0.105837	28.7672	59.1588	30	49.3161	66.4101	100000	100000	100001
18.45	110.591	0	15.5092	0.054189	-0.104976	28.7667	59.1609	30	49.3178	66.4124	100000	100000	100001
18.5	110.595	0	15.5096	0.052492	-0.104121	28.7662	59.1629	30	49.3194	66.4147	100000	100000	100001
18.55	110.598	0	15.51	0.0508481	-0.103272	28.7657	59.1649	30	49.321	66.4168	100000	100000	100001
18.6	110.602	0	15.5104	0.0492556	-0.102429	28.7653	59.1668	30	49.3225	66.4189	100000	100000	100001
18.65	110.605	0	15.5108	0.047713	-0.101592	28.7648	59.1686	30	49.3239	66.421	100000	100000	100001
18.7	110.609	0	15.5112	0.0462186	-0.10076	28.7643	59.1704	30	49.3253	66.4229	100000	100000	100001
18.75	110.612	0	15.5115	0.0447709	-0.0999347	28.7639	59.1721	30	49.3267	66.4248	100000	100000	100001
18.8	110.615	0	15.5118	0.0433685	-0.099115	28.7634	59.1737	30	49.328	66.4267	100000	100000	100001
18.85	110.618	0	15.5121	0.0420101	-0.0983011	28.763	59.1753	30	49.3292	66.4284	100000	100000	100001
18.9	110.621	0	15.5124	0.0406941	-0.0974931	28.7626	59.1769	30	49.3304	66.4301	100000	100000	100001
18.95	110.624	0	15.5127	0.0394194	-0.0966908	28.7622	59.1784	30	49.3316	66.4318	100000	100000	100001
19	110.627	0	15.5129	0.0381845	-0.0958944	28.7618	59.1799	30	49.3327	66.4334	100000	100000	100001
19.05	110.629	0	15.5132	0.0369883	-0.0951038	28.7614	59.1813	30	49.3337	66.4349	100000	100000	100001
19.1	110.632	0	15.5134	0.0358295	-0.0943189	28.761	59.1827	30	49.3348	66.4364	100000	100000	100001
19.15	110.635	0	15.5136	0.034707	-0.0935398	28.7606	59.184	30	49.3358	66.4378	100000	100000	100001
19.2	110.637	0	15.5138	0.0336196	-0.0927664	28.7602	59.1853	30	49.3367	66.4392	100000	100000	100001
19.25	110.639	0	15.514	0.0325663	-0.0919988	28.7599	59.1865	30	49.3376	66.4405	100000	100000	100001
19.3	110.642	0	15.5142	0.031546	-0.0912368	28.7595	59.1877	30	49.3385	66.4418	100000	100000	100001
19.35	110.644	0	15.5143	0.0305576	-0.0904805	28.7591	59.1889	30	49.3393	66.443	100000	100000	100001
19.4	110.646	0	15.5145	0.0296001	-0.0897298	28.7588	59.19	30	49.3401	66.4442	100000	100000	100001
19.45	110.648	0	15.5146	0.0286726	-0.0889848	28.7585	59.1911	30	49.3409	66.4453	100000	100000	100001
19.5	110.65	0	15.5147	0.0277742	-0.0882454	28.7581	59.1922	30	49.3416	66.4464	100000	100000	100001
19.55	110.652	0	15.5148	0.0269039	-0.0875116	28.7578	59.1932	30	49.3423	66.4475	100000	100000	100001
19.6	110.654	0	15.5149	0.0260609	-0.0867833	28.7575	59.1942	30	49.343	66.4485	100000	100000	100001
19.65	110.656	0	15.515	0.0252442	-0.0860606	28.7572	59.1952	30	49.3437	66.4495	100000	100000	100001
19.7	110.658	0	15.5151	0.0244532	-0.0853434	28.7569	59.1961	30	49.3443	66.4505	100000	100000	100001
19.75	110.659	0	15.5152	0.0236869	-0.0846317	28.7565	59.197	30	49.3449	66.4514	100000	100000	100001
19.8	110.661	0	15.5152	0.0229446	-0.0839255	28.7563	59.1979	30	49.3454	66.4523	100000	100000	100001
19.85	110.663	0	15.5153	0.0222256	-0.0832246	28.756	59.1988	30	49.346	66.4531	100000	100000	100001
19.9	110.664	0	15.5153	0.0215291	-0.0825292	28.7557	59.1996	30	49.3465	66.4539	100000	100000	100001
19.95	110.666	0	15.5154	0.0208544	-0.0818392	28.7554	59.2004	30	49.347	66.4547	100000	100000	100001
20	110.667	0	15.5154	0.0202008	-0.0811545	28.7551	59.2012	30	49.3475	66.4555	100000	100000	100001
20.05	110.669	0	15.5154	0.0195677	-0.0804752	28.7548	59.2019	30	49.3479	66.4562	100000	100000	100001
20.1	110.67	0	15.5154	0.0189545	-0.0798011	28.7546	59.2026	30	49.3483	66.4569	100000	100000	100001
20.15	110.671	0	15.5154	0.0183604	-0.0791323	28.7543	59.2033	30	49.3488	66.4576	100000	100000	100001
20.2	110.673	0	15.5154	0.017785	-0.0784688	28.754	59.204	30	49.3491	66.4582	100000	100000	100001
20.25	110.674	0	15.5154	0.0172276	-0.0778105	28.7538	59.2047	30	49.3495	66.4589	100000	100000	100001
20.3	110.675	0	15.5154	0.0166877	-0.0771573	28.7535	59.2053	30	49.3499	66.4594	100000	100000	100001
20.35	110.676	0	15.5154	0.0161646	-0.0765093	28.7533	59.2059	30	49.3502	66.46	100000	100000	100001
20.4	110.677	0	15.5154	0.015658	-0.0758664	28.753	59.2065	30	49.3505	66.4606	100000	100000	100001
20.45	110.678	0	15.5154	0.0151672	-0.0752287	28.7528	59.2071	30	49.3508	66.4611	100000	100000	100001
20.5	110.679	0	15.5153	0.0146918	-0.0745959	28.7526	59.2077	30	49.3511	66.4616	100000	100000	100001
20.55	110.681	0	15.5153	0.0142314	-0.0739683	28.7523	59.2082	30	49.3514	66.4621	100000	100000	100001
20.6	110.682	0	15.5152	0.0137853	-0.0733456	28.7521	59.2088	30	49.3516	66.4626	100000	100000	100001
20.65	110.682	0	15.5152	0.0133532	-0.0727279	28.7519	59.2093	30	49.3519	66.463	100000	100000	100001
20.7	110.683	0	15.5152	0.0129347	-0.0721151	28.7517	59.2098	30	49.3521	66.4634	100000	100000	100001
20.75	110.684	0	15.5151	0.0125293	-0.0715072	28.7514	59.2102	30	49.3523	66.4639	100000	100000	100001
20.8	110.685	0	15.515	0.0121365	-0.0709042	28.7512	59.2107	30	49.3525	66.4642	100000	100000	100001
20.85	110.686	0	15.515	0.0117561	-0.0703061	28.751	59.2112	30	49.3527	66.4646	100000	100000	100001
20.9	110.687	0	15.5149	0.0113876	-0.0697128	28.7508	59.2116	30	49.3529	66.465	100000	100000	100001
20.95	110.688	0	15.5148	0.0110307	-0.0691242	28.7506	59.212	30	49.353	66.4653	100000	100000	100001
21	110.688	0	15.5148	0.0106849	-0.0685404	28.7504	59.2124	30	49.3532	66.4657	100000	100000	100001
21.05	110.689	0	15.5147	0.01035	-0.0679614	28.7502	59.2128	30	49.3533	66.466	100000	100000	100001
21.1	110.69	0	15.5146	0.0100256	-0.067387	28.75	59.2132	30	49.3535	66.4663	100000	100000	100001
21.15	110.691	0	15.5145	0.00971133	-0.0668173	28.7498	59.2136	30	49.3536	66.4666	100000	100000	100001
21.2	110.691	0	15.5145	0.00940692	-0.0662522	28.7496	59.2139	30	49.3537	66.4668	100000	100000	100001
21.25	110.692	0	15.5144	0.00911205	-0.0656917	28.7494	59.2143	30	49.3538	66.4671	100000	100000	100001
21.3	110.693	0	15.5143	0.00882642	-0.0651358	28.7492	59.2146	30	49.3539	66.4673	100000	100000	100001
21.35	110.693	0	15.5142	0.00854974	-0.0645844	28.7491	59.215	30	49.354	66.4676	100000	100000	100001
21.4	110.694	0	15.5141	0.00828174	-0.0640375	28.7489	59.2153	30	49.3541	66.4678	100000	100000	100001
21.45	110.694	0	15.514	0.00802214	-0.0634951	28.7487	59.2156	30	49.3541	66.468	100000	100000	100001
21.5	110.695	0	15.5139	0.00777067	-0.0629571	28.7485	59.2159	30	49.3542	66.4682	100000	100000	100001
21.55	110.696	0	15.5138	0.00752709	-0.0624235	28.7484	59.2162	30	49.3542	66.4684	100000	100000	100001
21.6	110.696	0	15.5137	0.00729113	-0.0618943	28.7482	59.2164	30	49.3543	66.4686	100000	100000	100001
21.65	110.697	0	15.5136	0.00706258	-0.0613695	28.748	59.2167	30	49.3543	66.4688	100000	100000	100001
21.7	110.697	0	15.5135	0.00684119	-0.0608489	28.7479	59.217	30	49.3544	66.4689	100000	100000	100001
21.75	110.698	0	15.5134	0.00662674	-0.0603327	28.7477	59.2172	30	49.3544	66.4691	100000	100000	100001
21.8	110.698	0	15.5133	0.00641901	-0.0598207	28.7475	59.2175	30	49.3544	66.4692	100000	100000	100001
21.85	110.698	0	15.5132	0.00621779	-0.0593129	28.7474	59.2177	30	49.3544	66.4694	100000	100000	100001
21.9	110.699	0	15.5131	0.00602288	-0.0588093	28.7472	59.2179	30	49.3544	66.4695	100000	100000	100001
21.95	110.699	0	15.5129	0.00583408	-0.0583099	28.7471	59.2182	30	49.3544	66.4696	100000	100000	100001
22	110.7	0	15.5128	0.00565119	-0.0578146	28.7469	59.2184	30	49.3544	66.4697	100000	100000	100001
22.05	110.7	0	15.5127	0.00547404	-0.0573234	28.7468	59.2186	30	49.3544	66.4699	100000	100000	100001
22.1	110.701	0	15.5126	0.00530245	-0.0568363	28.7466	59.2188	30	49.3544	66.47	100000	100000	100001
22.15	110.701	0	15.5125	0.00513622	-0.0563532	28.7465	59.219	30	49.3544	66.4701	100000	100000	100001
22.2	110.701	0	15.5124	0.00497521	-0.0558741	28.7463	59.2192	30	49.3544	66.4701	100000	100000	100001
22.25	110.702	0	15.5123	0.00481925	-0.055399	28.7462	59.2194	30	49.3544	66.4702	100000	100000	100001
22.3	110.702	0	15.5121	0.00466818	-0.0549279	28.746	59.2196	30	49.3543	66.4703	100000	100000	100001
22.35	110.702	0	15.512	0.00452184	-0.0544606	28.7459	59.2197	30	49.3543	66.4704	100000	100000	100001
22.4	110.703	0	15.5119	0.00438009	-0.0539973	28.7458	59.2199	30	49.3543	66.4704	100000	100000	100001
22.45	110.703	0	15.5118	0.00424278	-0.0535378	28.7456	59.2201	30	49.3542	66.4705	100000	100000	100001
22.5	110.703	0	15.5117	0.00410978	-0.0530821	28.7455	59.2202	30	49.3542	66.4705	100000	100000	100001
22.55	110.704	0	15.5115	0.00398095	-0.0526303	28.7454	59.2204	30	49.3541	66.4706	100000	100000	100001
22.6	110.704	0	15.5114	0.00385616	-0.0521822	28.7452	59.2205	30	49.3541	66.4706	100000	100000	100001
22.65	110.704	0	15.5113	0.00373527	-0.0517379	28.7451	59.2207	30	49.354	66.4707	100000	100000	100001
22.7	110.704	0	15.5112	0.00361818	-0.0512972	28.745	59.2208	30	49.354	66.4707	100000	100000	100001
22.75	110.705	0	15.5111	0.00350475	-0.0508603	28.7448	59.2209	30	49.3539	66.4707	100000	100000	100001
22.8	110.705	0	15.5109	0.00339489	-0.050427	28.7447	59.2211	30	49.3539	66.4708	100000	100000	100001
22.85	110.705	0	15.5108	0.00328846	-0.0499973	28.7446	59.2212	30	49.3538	66.4708	100000	100000	100001
22.9	110.705	0	15.5107	0.00318538	-0.0495713	28.7445	59.2213	30	49.3537	66.4708	100000	100000	100001
22.95	110.706	0	15.5106	0.00308552	-0.0491488	28.7444	59.2214	30	49.3537	66.4708	100000	100000	100001
23	110.706	0	15.5104	0.00298879	-0.0487299	28.7442	59.2215	30	49.3536	66.4708	100000	100000	100001
23.05	110.706	0	15.5103	0.0028951	-0.0483144	28.7441	59.2217	30	49.3535	66.4708	100000	100000	100001
23.1	110.706	0	15.5102	0.00280435	-0.0479025	28.744	59.2218	30	49.3535	66.4708	100000	100000	100001
23.15	110.706	0	15.5101	0.00271643	-0.047494	28.7439	59.2219	30	49.3534	66.4708	100000	100000	100001
23.2	110.707	0	15.51	0.00263128	-0.047089	28.7438	59.222	30	49.3533	66.4708	100000	100000	100001
23.25	110.707	0	15.5098	0.00254879	-0.0466873	28.7437	59.2221	30	49.3532	66.4708	100000	100000	100001
23.3	110.707	0	15.5097	0.00246889	-0.0462891	28.7435	59.2222	30	49.3532	66.4708	100000	100000	100001
23.35	110.707	0	15.5096	0.0023915	-0.0458941	28.7434	59.2222	30	49.3531	66.4708	100000	100000	100001
23.4	110.707	0	15.5095	0.00231653	-0.0455026	28.7433	59.2223	30	49.353	66.4708	100000	100000	100001
23.45	110.707	0	15.5094	0.00224391	-0.0451143	28.7432	59.2224	30	49.3529	66.4708	100000	100000	100001
23.5	110.708	0	15.5092	0.00217357	-0.0447293	28.7431	59.2225	30	49.3528	66.4708	100000	100000	100001
23.55	110.708	0	15.5091	0.00210543	-0.0443475	28.743	59.2226	30	49.3527	66.4708	100000	100000	100001
23.6	110.708	0	15.509	0.00203943	-0.0439689	28.7429	59.2227	30	49.3526	66.4707	100000	100000	100001
23.65	110.708	0	15.5089	0.0019755	-0.0435936	28.7428	59.2227	30	49.3526	66.4707	100000	100000	100001
23.7	110.708	0	15.5088	0.00191357	-0.0432214	28.7427	59.2228	30	49.3525	66.4707	100000	100000	100001
23.75	110.708	0	15.5086	0.00185358	-0.0428524	28.7426	59.2229	30	49.3524	66.4707	100000	100000	100001
23.8	110.708	0	15.5085	0.00179548	-0.0424864	28.7425	59.223	30	49.3523	66.4706	100000	100000	100001
23.85	110.709	0	15.5084	0.00173919	-0.0421236	28.7424	59.223	30	49.3522	66.4706	100000	100000	100001
23.9	110.709	0	15.5083	0.00168467	-0.0417638	28.7423	59.2231	30	49.3521	66.4706	100000	100000	100001
23.95	110.709	0	15.5082	0.00163186	-0.0414071	28.7422	59.2231	30	49.352	66.4705	100000	100000	100001
24	110.709	0	15.508	0.0015807	-0.0410534	28.7421	59.2232	30	49.3519	66.4705	100000	100000	100001
24.05	110.709	0	15.5079	0.00153115	-0.0407027	28.742	59.2233	30	49.3518	66.4704	100000	100000	100001
24.1	110.709	0	15.5078	0.00148315	-0.040355	28.7419	59.2233	30	49.3517	66.4704	100000	100000	100001
24.15	110.709	0	15.5077	0.00143666	-0.0400102	28.7418	59.2234	30	49.3516	66.4704	100000	100000	100001
24.2	110.709	0	15.5076	0.00139162	-0.0396683	28.7417	59.2234	30	49.3515	66.4703	100000	100000	100001
24.25	110.709	0	15.5075	0.001348	-0.0393293	28.7416	59.2235	30	49.3514	66.4703	100000	100000	100001
24.3	110.71	0	15.5074	0.00130574	-0.0389932	28.7416	59.2235	30	49.3513	66.4702	100000	100000	100001
24.35	110.71	0	15.5072	0.00126481	-0.0386599	28.7415	59.2236	30	49.3512	66.4702	100000	100000	100001
24.4	110.71	0	15.5071	0.00122516	-0.0383295	28.7414	59.2236	30	49.3511	66.4702	100000	100000	100001
24.45	110.71	0	15.507	0.00118675	-0.0380019	28.7413	59.2237	30	49.351	66.4701	100000	100000	100001
24.5	110.71	0	15.5069	0.00114955	-0.037677	28.7412	59.2237	30	49.3509	66.4701	100000	100000	100001
24.55	110.71	0	15.5068	0.00111352	-0.0373549	28.7411	59.2238	30	49.3508	66.47	100000	100000	100001
24.6	110.71	0	15.5067	0.00107861	-0.0370356	28.741	59.2238	30	49.3507	66.47	100000	100000	100001
24.65	110.71	0	15.5066	0.0010448	-0.0367189	28.741	59.2238	30	49.3507	66.4699	100000	100000	100001
24.7	110.71	0	15.5065	0.00101205	-0.0364049	28.7409	59.2239	30	49.3506	66.4699	100000	100000	100001
24.75	110.71	0	15.5064	0.00098032	-0.0360937	28.7408	59.2239	30	49.3505	66.4698	100000	100000	100001
24.8	110.71	0	15.5062	0.00094959	-0.035785	28.7407	59.224	30	49.3504	66.4698	100000	100000	100001
24.85	110.71	0	15.5061	0.000919823	-0.035479	28.7406	59.224	30	49.3503	66.4697	100000	100000	100001
24.9	110.71	0	15.506	0.000890989	-0.0351756	28.7406	59.224	30	49.3502	66.4696	100000	100000	100001
24.95	110.711	0	15.5059	0.000863058	-0.0348747	28.7405	59.2241	30	49.3501	66.4696	100000	100000	100001
25	110.711	0	15.5058	0.000836003	-0.0345764	28.7404	59.2241	30	49.35	66.4695	100000	100000	100001
25.05	110.711	0	15.5057	0.000809797	-0.0342807	28.7403	59.2241	30	49.3499	66.4695	100000	100000	100001
25.1	110.711	0	15.5056	0.000784412	-0.0339874	28.7402	59.2242	30	49.3498	66.4694	100000	100000	100001
25.15	110.711	0	15.5055	0.000759823	-0.0336967	28.7402	59.2242	30	49.3497	66.4694	100000	100000	100001
25.2	110.711	0	15.5054	0.000736004	-0.0334084	28.7401	59.2242	30	49.3496	66.4693	100000	100000	100001
25.25	110.711	0	15.5053	0.000712932	-0.0331226	28.74	59.2242	30	49.3495	66.4693	100000	100000	100001
25.3	110.711	0	15.5052	0.000690583	-0.0328393	28.7399	59.2243	30	49.3494	66.4692	100000	100000	100001
25.35	110.711	0	15.5051	0.000668936	-0.0325583	28.7399	59.2243	30	49.3493	66.4691	100000	100000	100001
25.4	110.711	0	15.505	0.000647967	-0.0322797	28.7398	59.2243	30	49.3492	66.4691	100000	100000	100001
25.45	110.711	0	15.5049	0.000627655	-0.0320035	28.7397	59.2243	30	49.3491	66.469	100000	100000	100001
25.5	110.711	0	15.5048	0.000607979	-0.0317297	28.7397	59.2244	30	49.349	66.469	100000	100000	100001
25.55	110.711	0	15.5047	0.00058892	-0.0314582	28.7396	59.2244	30	49.3489	66.4689	100000	100000	100001
25.6	110.711	0	15.5046	0.00057046	-0.031189	28.7395	59.2244	30	49.3488	66.4689	100000	100000	100001
25.65	110.711	0	15.5045	0.000552578	-0.030922	28.7395	59.2244	30	49.3487	66.4688	100000	100000	100001
25.7	110.711	0	15.5044	0.000535256	-0.0306574	28.7394	59.2244	30	49.3486	66.4687	100000	100000	100001
25.75	110.711	0	15.5043	0.000518477	-0.030395	28.7393	59.2245	30	49.3485	66.4687	100000	100000	100001
25.8	110.711	0	15.5042	0.000502224	-0.0301349	28.7393	59.2245	30	49.3484	66.4686	100000	100000	100001
25.85	110.711	0	15.5041	0.000486481	-0.029877	28.7392	59.2245	30	49.3483	66.4686	100000	100000	100001
25.9	110.711	0	15.504	0.000471231	-0.0296213	28.7391	59.2245	30	49.3482	66.4685	100000	100000	100001
25.95	110.711	0	15.5039	0.00045646	-0.0293677	28.7391	59.2245	30	49.3481	66.4684	100000	100000	100001
26	110.711	0	15.5038	0.000442151	-0.0291164	28.739	59.2246	30	49.348	66.4684	100000	100000	100001
26.05	110.711	0	15.5037	0.000428291	-0.0288671	28.7389	59.2246	30	49.3479	66.4683	100000	100000	100001
26.1	110.712	0	15.5036	0.000414865	-0.02862	28.7389	59.2246	30	49.3479	66.4683	100000	100000	100001
26.15	110.712	0	15.5036	0.000401861	-0.028375	28.7388	59.2246	30	49.3478	66.4682	100000	100000	100001
26.2	110.712	0	15.5035	0.000389264	-0.0281321	28.7387	59.2246	30	49.3477	66.4682	100000	100000	100001
26.25	110.712	0	15.5034	0.000377062	-0.0278913	28.7387	59.2246	30	49.3476	66.4681	100000	100000	100001
26.3	110.712	0	15.5033	0.000365242	-0.0276525	28.7386	59.2246	30	49.3475	66.468	100000	100000	100001
26.35	110.712	0	15.5032	0.000353793	-0.0274158	28.7386	59.2247	30	49.3474	66.468	100000	100000	100001
26.4	110.712	0	15.5031	0.000342703	-0.027181	28.7385	59.2247	30	49.3473	66.4679	100000	100000	100001
26.45	110.712	0	15.503	0.00033196	-0.0269483	28.7384	59.2247	30	49.3472	66.4679	100000	100000	100001
26.5	110.712	0	15.5029	0.000321554	-0.0267176	28.7384	59.2247	30	49.3471	66.4678	100000	100000	100001
26.55	110.712	0	15.5028	0.000311475	-0.0264889	28.7383	59.2247	30	49.347	66.4677	100000	100000	100001
26.6	110.712	0	15.5028	0.000301711	-0.0262621	28.7383	59.2247	30	49.347	66.4677	100000	100000	100001
26.65	110.712	0	15.5027	0.000292253	-0.0260372	28.7382	59.2247	30	49.3469	66.4676	100000	100000	100001
26.7	110.712	0	15.5026	0.000283092	-0.0258142	28.7382	59.2247	30	49.3468	66.4676	100000	100000	100001
26.75	110.712	0	15.5025	0.000274218	-0.0255932	28.7381	59.2248	30	49.3467	66.4675	100000	100000	100001
26.8	110.712	0	15.5024	0.000265623	-0.0253741	28.738	59.2248	30	49.3466	66.4675	100000	100000	100001
26.85	110.712	0	15.5023	0.000257296	-0.0251568	28.738	59.2248	30	49.3465	66.4674	100000	100000	100001
26.9	110.712	0	15.5023	0.000249231	-0.0249414	28.7379	59.2248	30	49.3464	66.4673	100000	100000	100001
26.95	110.712	0	15.5022	0.000241418	-0.0247278	28.7379	59.2248	30	49.3464	66.4673	100000	100000	100001
27	110.712	0	15.5021	0.000233851	-0.024516	28.7378	59.2248	30	49.3463	66.4672	100000	100000	100001
27.05	110.712	0	15.502	0.000226521	-0.0243061	28.7378	59.2248	30	49.3462	66.4672	100000	100000	100001
27.1	110.712	0	15.5019	0.00021942	-0.0240979	28.7377	59.2248	30	49.3461	66.4671	100000	100000	100001
27.15	110.712	0	15.5019	0.000212542	-0.0238916	28.7377	59.2248	30	49.346	66.4671	100000	100000	100001
27.2	110.712	0	15.5018	0.00020588	-0.023687	28.7376	59.2248	30	49.3459	66.467	100000	100000	100001
27.25	110.712	0	15.5017	0.000199426	-0.0234841	28.7376	59.2248	30	49.3459	66.467	100000	100000	100001
27.3	110.712	0	15.5016	0.000193175	-0.023283	28.7375	59.2249	30	49.3458	66.4669	100000	100000	100001
27.35	110.712	0	15.5015	0.00018712	-0.0230836	28.7375	59.2249	30	49.3457	66.4668	100000	100000	100001
27.4	110.712	0	15.5015	0.000181254	-0.0228859	28.7374	59.2249	30	49.3456	66.4668	100000	100000	100001
27.45	110.712	0	15.5014	0.000175573	-0.0226899	28.7374	59.2249	30	49.3455	66.4667	100000	100000	100001
27.5	110.712	0	15.5013	0.000170069	-0.0224955	28.7373	59.2249	30	49.3455	66.4667	100000	100000	100001
27.55	110.712	0	15.5012	0.000164738	-0.0223029	28.7373	59.2249	30	49.3454	66.4666	100000	100000	100001
27.6	110.712	0	15.5012	0.000159574	-0.0221119	28.7372	59.2249	30	49.3453	66.4666	100000	100000	100001
27.65	110.712	0	15.5011	0.000154572	-0.0219225	28.7372	59.2249	30	49.3452	66.4665	100000	100000	100001
27.7	110.712	0	15.501	0.000149727	-0.0217347	28.7371	59.2249	30	49.3452	66.4665	100000	100000	100001
27.75	110.712	0	15.501	0.000145034	-0.0215485	28.7371	59.2249	30	49.3451	66.4664	100000	100000	100001
27.8	110.712	0	15.5009	0.000140488	-0.021364	28.737	59.2249	30	49.345	66.4664	100000	100000	100001
27.85	110.712	0	15.5008	0.000136084	-0.021181	28.737	59.2249	30	49.3449	66.4663	100000	100000	100001
27.9	110.712	0	15.5007	0.000131818	-0.0209996	28.7369	59.2249	30	49.3449	66.4663	100000	100000	100001
27.95	110.712	0	15.5007	0.000127686	-0.0208197	28.7369	59.2249	30	49.3448	66.4662	100000	100000	100001
28	110.712	0	15.5006	0.000123684	-0.0206414	28.7369	59.2249	30	49.3447	66.4662	100000	100000	100001
28.05	110.712	0	15.5005	0.000119807	-0.0204645	28.7368	59.2249	30	49.3446	66.4661	100000	100000	100001
28.1	110.712	0	15.5005	0.000116052	-0.0202893	28.7368	59.2249	30	49.3446	66.4661	100000	100000	100001
28.15	110.712	0	15.5004	0.000112414	-0.0201155	28.7367	59.2249	30	49.3445	66.466	100000	100000	100001
28.2	110.712	0	15.5003	0.00010889	-0.0199432	28.7367	59.225	30	49.3444	66.466	100000	100000	100001
28.25	110.712	0	15.5003	0.000105477	-0.0197723	28.7366	59.225	30	49.3444	66.4659	100000	100000	100001
28.3	110.712	0	15.5002	0.000102171	-0.019603	28.7366	59.225	30	49.3443	66.4659	100000	100000	100001
28.35	110.712	0	15.5001	9.89681e-05	-0.019435	28.7366	59.225	30	49.3442	66.4658	100000	100000	100001
28.4	110.712	0	15.5001	9.58659e-05	-0.0192686	28.7365	59.225	30	49.3441	66.4658	100000	100000	100001
28.45	110.712	0	15.5	9.2861e-05	-0.0191035	28.7365	59.225	30	49.3441	66.4657	100000	100000	100001
28.5	110.712	0	15.4999	8.99502e-05	-0.0189399	28.7364	59.225	30	49.344	66.4657	100000	100000	100001
28.55	110.712	0	15.4999	8.71307e-05	-0.0187776	28.7364	59.225	30	49.3439	66.4656	100000	100000	100001
28.6	110.712	0	15.4998	8.43995e-05	-0.0186168	28.7364	59.225	30	49.3439	66.4656	100000	100000	100001
28.65	110.712	0	15.4998	8.1754e-05	-0.0184573	28.7363	59.225	30	49.3438	66.4655	100000	100000	100001
28.7	110.712	0	15.4997	7.91914e-05	-0.0182992	28.7363	59.225	30	49.3437	66.4655	100000	100000	100001
28.75	110.712	0	15.4996	7.67091e-05	-0.0181424	28.7362	59.225	30	49.3437	66.4654	100000	100000	100001
28.8	110.712	0	15.4996	7.43047e-05	-0.017987	28.7362	59.225	30	49.3436	66.4654	100000	100000	100001
28.85	110.712	0	15.4995	7.19755e-05	-0.0178329	28.7362	59.225	30	49.3435	66.4654	100000	100000	100001
28.9	110.712	0	15.4995	6.97194e-05	-0.0176801	28.7361	59.225	30	49.3435	66.4653	100000	100000	100001
28.95	110.712	0	15.4994	6.75341e-05	-0.0175287	28.7361	59.225	30	49.3434	66.4653	100000	100000	100001
29	110.712	0	15.4993	6.54172e-05	-0.0173785	28.736	59.225	30	49.3434	66.4652	100000	100000	100001
29.05	110.712	0	15.4993	6.33667e-05	-0.0172296	28.736	59.225	30	49.3433	66.4652	100000	100000	100001
29.1	110.712	0	15.4992	6.13805e-05	-0.017082	28.736	59.225	30	49.3432	66.4651	100000	100000	100001
29.15	110.712	0	15.4992	5.94565e-05	-0.0169357	28.7359	59.225	30	49.3432	66.4651	100000	100000	100001
29.2	110.712	0	15.4991	5.75928e-05	-0.0167906	28.7359	59.225	30	49.3431	66.465	100000	100000	100001
29.25	110.712	0	15.4991	5.57876e-05	-0.0166468	28.7359	59.225	30	49.343	66.465	100000	100000	100001
29.3	110.712	0	15.499	5.40389e-05	-0.0165041	28.7358	59.225	30	49.343	66.465	100000	100000	100001
29.35	110.712	0	15.4989	5.23451e-05	-0.0163628	28.7358	59.225	30	49.3429	66.4649	100000	100000	100001
29.4	110.712	0	15.4989	5.07043e-05	-0.0162226	28.7358	59.225	30	49.3429	66.4649	100000	100000	100001
29.45	110.712	0	15.4988	4.9115e-05	-0.0160836	28.7357	59.225	30	49.3428	66.4648	100000	100000	100001
29.5	110.712	0	15.4988	4.75755e-05	-0.0159458	28.7357	59.225	30	49.3427	66.4648	100000	100000	100001
29.55	110.712	0	15.4987	4.60842e-05	-0.0158092	28.7357	59.225	30	49.3427	66.4647	100000	100000	100001
29.6	110.712	0	15.4987	4.46398e-05	-0.0156738	28.7356	59.225	30	49.3426	66.4647	100000	100000	100001
29.65	110.712	0	15.4986	4.32405e-05	-0.0155395	28.7356	59.225	30	49.3426	66.4647	100000	100000	100001
29.7	110.712	0	15.4986	4.18851e-05	-0.0154064	28.7356	59.225	30	49.3425	66.4646	100000	100000	100001
29.75	110.712	0	15.4985	4.05722e-05	-0.0152744	28.7355	59.225	30	49.3425	66.4646	100000	100000	100001
29.8	110.712	0	15.4985	3.93005e-05	-0.0151435	28.7355	59.225	30	49.3424	66.4645	100000	100000	100001
29.85	110.712	0	15.4984	3.80687e-05	-0.0150138	28.7355	59.225	30	49.3423	66.4645	100000	100000	100001
29.9	110.712	0	15.4984	3.68754e-05	-0.0148851	28.7354	59.225	30	49.3423	66.4645	100000	100000	100001
29.95	110.712	0	15.4983	3.57196e-05	-0.0147576	28.7354	59.225	30	49.3422	66.4644	100000	100000	100001
30	110.712	0	15.4983	3.45999e-05	-0.0146312	28.7354	59.225	30	49.3422	66.4644	100000	100000	100001
30.05	110.712	0	15.4982	3.35154e-05	-0.0145058	28.7353	59.225	30	49.3421	66.4644	100000	100000	100001
30.1	110.712	0	15.4982	3.24649e-05	-0.0143816	28.7353	59.225	30	49.3421	66.4643	100000	100000	100001
30.15	110.712	0	15.4981	3.14473e-05	-0.0142584	28.7353	59.225	30	49.342	66.4643	100000	100000	100001
30.2	110.712	0	15.4981	3.04616e-05	-0.0141362	28.7352	59.225	30	49.342	66.4642	100000	100000	100001
30.25	110.712	0	15.498	2.95068e-05	-0.0140151	28.7352	59.225	30	49.3419	66.4642	100000	100000	100001
30.3	110.712	0	15.498	2.85819e-05	-0.013895	28.7352	59.225	30	49.3419	66.4642	100000	100000	100001
30.35	110.712	0	15.4979	2.7686e-05	-0.013776	28.7352	59.225	30	49.3418	66.4641	100000	100000	100001
30.4	110.712	0	15.4979	2.68182e-05	-0.0136579	28.7351	59.225	30	49.3418	66.4641	100000	100000	100001
30.45	110.712	0	15.4978	2.59776e-05	-0.0135409	28.7351	59.2251	30	49.3417	66.4641	100000	100000	100001
30.5	110.712	0	15.4978	2.51634e-05	-0.0134249	28.7351	59.2251	30	49.3417	66.464	100000	100000	100001
30.55	110.712	0	15.4977	2.43746e-05	-0.0133099	28.735	59.2251	30	49.3416	66.464	100000	100000	100001
30.6	110.712	0	15.4977	2.36106e-05	-0.0131959	28.735	59.2251	30	49.3416	66.4639	100000	100000	100001
30.65	110.712	0	15.4976	2.28706e-05	-0.0130828	28.735	59.2251	30	49.3415	66.4639	100000	100000	100001
30.7	110.712	0	15.4976	2.21537e-05	-0.0129707	28.735	59.2251	30	49.3415	66.4639	100000	100000	100001
30.75	110.712	0	15.4976	2.14593e-05	-0.0128596	28.7349	59.2251	30	49.3414	66.4638	100000	100000	100001
30.8	110.712	0	15.4975	2.07867e-05	-0.0127494	28.7349	59.2251	30	49.3414	66.4638	100000	100000	100001
30.85	110.712	0	15.4975	2.01351e-05	-0.0126402	28.7349	59.2251	30	49.3413	66.4638	100000	100000	100001
30.9	110.712	0	15.4974	1.9504e-05	-0.0125319	28.7349	59.2251	30	49.3413	66.4637	100000	100000	100001
30.95	110.712	0	15.4974	1.88927e-05	-0.0124245	28.7348	59.2251	30	49.3412	66.4637	100000	100000	100001
31	110.712	0	15.4973	1.83005e-05	-0.0123181	28.7348	59.2251	30	49.3412	66.4637	100000	100000	100001
31.05	110.712	0	15.4973	1.77269e-05	-0.0122126	28.7348	59.2251	30	49.3411	66.4636	100000	100000	100001
31.1	110.712	0	15.4973	1.71712e-05	-0.0121079	28.7347	59.2251	30	49.3411	66.4636	100000	100000	100001
31.15	110.712	0	15.4972	1.6633e-05	-0.0120042	28.7347	59.2251	30	49.3411	66.4636	100000	100000	100001
31.2	110.712	0	15.4972	1.61117e-05	-0.0119014	28.7347	59.2251	30	49.341	66.4635	100000	100000	100001
31.25	110.712	0	15.4971	1.56067e-05	-0.0117994	28.7347	59.2251	30	49.341	66.4635	100000	100000	100001
31.3	110.712	0	15.4971	1.51175e-05	-0.0116983	28.7346	59.2251	30	49.3409	66.4635	100000	100000	100001
31.35	110.712	0	15.4971	1.46436e-05	-0.0115981	28.7346	59.2251	30	49.3409	66.4635	100000	100000	100001
31.4	110.712	0	15.497	1.41846e-05	-0.0114987	28.7346	59.2251	30	49.3408	66.4634	100000	100000	100001
31.45	110.712	0	15.497	1.374e-05	-0.0114002	28.7346	59.2251	30	49.3408	66.4634	100000	100000	100001
31.5	110.712	0	15.4969	1.33094e-05	-0.0113025	28.7345	59.2251	30	49.3408	66.4634	100000	100000	100001
31.55	110.712	0	15.4969	1.28922e-05	-0.0112057	28.7345	59.2251	30	49.3407	66.4633	100000	100000	100001
31.6	110.712	0	15.4969	1.24881e-05	-0.0111097	28.7345	59.2251	30	49.3407	66.4633	100000	100000	100001
31.65	110.712	0	15.4968	1.20967e-05	-0.0110145	28.7345	59.2251	30	49.3406	66.4633	100000	100000	100001
31.7	110.712	0	15.4968	1.17175e-05	-0.0109201	28.7345	59.2251	30	49.3406	66.4632	100000	100000	100001
31.75	110.712	0	15.4968	1.13502e-05	-0.0108266	28.7344	59.2251	30	49.3406	66.4632	100000	100000	100001
31.8	110.712	0	15.4967	1.09945e-05	-0.0107338	28.7344	59.2251	30	49.3405	66.4632	100000	100000	100001
31.85	110.712	0	15.4967	1.06499e-05	-0.0106419	28.7344	59.2251	30	49.3405	66.4632	100000	100000	100001
31.9	110.712	0	15.4966	1.03161e-05	-0.0105507	28.7344	59.2251	30	49.3404	66.4631	100000	100000	100001
31.95	110.712	0	15.4966	9.99271e-06	-0.0104603	28.7343	59.2251	30	49.3404	66.4631	100000	100000	100001
32	110.712	0	15.4966	9.6795e-06	-0.0103707	28.7343	59.2251	30	49.3404	66.4631	100000	100000	100001
32.05	110.712	0	15.4965	9.37611e-06	-0.0102818	28.7343	59.2251	30	49.3403	66.463	100000	100000	100001
32.1	110.712	0	15.4965	9.08223e-06	-0.0101937	28.7343	59.2251	30	49.3403	66.463	100000	100000	100001
32.15	110.712	0	15.4965	8.79755e-06	-0.0101064	28.7343	59.2251	30	49.3402	66.463	100000	100000	100001
32.2	110.712	0	15.4964	8.5218e-06	-0.0100198	28.7342	59.2251	30	49.3402	66.463	100000	100000	100001
32.25	110.712	0	15.4964	8.25469e-06	-0.00993397	28.7342	59.2251	30	49.3402	66.4629	100000	100000	100001
32.3	110.712	0	15.4964	7.99596e-06	-0.00984886	28.7342	59.2251	30	49.3401	66.4629	100000	100000	100001
32.35	110.712	0	15.4963	7.74534e-06	-0.00976448	28.7342	59.2251	30	49.3401	66.4629	100000	100000	100001
32.4	110.712	0	15.4963	7.50257e-06	-0.00968083	28.7342	59.2251	30	49.3401	66.4629	100000	100000	100001
32.45	110.712	0	15.4963	7.26741e-06	-0.00959789	28.7341	59.2251	30	49.34	66.4628	100000	100000	100001
32.5	110.712	0	15.4962	7.03962e-06	-0.00951566	28.7341	59.2251	30	49.34	66.4628	100000	100000	100001
32.55	110.712	0	15.4962	6.81897e-06	-0.00943413	28.7341	59.2251	30	49.3399	66.4628	100000	100000	100001
32.6	110.712	0	15.4962	6.60524e-06	-0.00935331	28.7341	59.2251	30	49.3399	66.4628	100000	100000	100001
32.65	110.712	0	15.4961	6.39821e-06	-0.00927317	28.7341	59.2251	30	49.3399	66.4627	100000	100000	100001
32.7	110.712	0	15.4961	6.19766e-06	-0.00919373	28.734	59.2251	30	49.3398	66.4627	100000	100000	100001
32.75	110.712	0	15.4961	6.00341e-06	-0.00911496	28.734	59.2251	30	49.3398	66.4627	100000	100000	100001
32.8	110.712	0	15.496	5.81523e-06	-0.00903687	28.734	59.2251	30	49.3398	66.4627	100000	100000	100001
32.85	110.712	0	15.496	5.63296e-06	-0.00895945	28.734	59.2251	30	49.3397	66.4626	100000	100000	100001
32.9	110.712	0	15.496	5.45641e-06	-0.00888269	28.734	59.2251	30	49.3397	66.4626	100000	100000	100001
32.95	110.712	0	15.496	5.28538e-06	-0.00880659	28.7339	59.2251	30	49.3397	66.4626	100000	100000	100001
33	110.712	0	15.4959	5.11972e-06	-0.00873114	28.7339	59.2251	30	49.3396	66.4626	100000	100000	100001
33.05	110.712	0	15.4959	4.95925e-06	-0.00865633	28.7339	59.2251	30	49.3396	66.4625	100000	100000	100001
33.1	110.712	0	15.4959	4.8038e-06	-0.00858217	28.7339	59.2251	30	49.3396	66.4625	100000	100000	100001
33.15	110.712	0	15.4958	4.65324e-06	-0.00850865	28.7339	59.2251	30	49.3395	66.4625	100000	100000	100001
33.2	110.712	0	15.4958	4.50739e-06	-0.00843575	28.7338	59.2251	30	49.3395	66.4625	100000	100000	100001
33.25	110.712	0	15.4958	4.36611e-06	-0.00836348	28.7338	59.2251	30	49.3395	66.4624	100000	100000	100001
33.3	110.712	0	15.4958	4.22926e-06	-0.00829182	28.7338	59.2251	30	49.3395	66.4624	100000	100000	100001
33.35	110.712	0	15.4957	4.0967e-06	-0.00822079	28.7338	59.2251	30	49.3394	66.4624	100000	100000	100001
33.4	110.712	0	15.4957	3.96829e-06	-0.00815036	28.7338	59.2251	30	49.3394	66.4624	100000	100000	100001
33.45	110.712	0	15.4957	3.84392e-06	-0.00808053	28.7338	59.2251	30	49.3394	66.4624	100000	100000	100001
33.5	110.712	0	15.4956	3.72343e-06	-0.0080113	28.7337	59.2251	30	49.3393	66.4623	100000	100000	100001
33.55	110.712	0	15.4956	3.60673e-06	-0.00794267	28.7337	59.2251	30	49.3393	66.4623	100000	100000	100001
33.6	110.712	0	15.4956	3.49368e-06	-0.00787462	28.7337	59.2251	30	49.3393	66.4623	100000	100000	100001
33.65	110.712	0	15.4956	3.38417e-06	-0.00780715	28.7337	59.2251	30	49.3392	66.4623	100000	100000	100001
33.7	110.712	0	15.4955	3.2781e-06	-0.00774027	28.7337	59.2251	30	49.3392	66.4622	100000	100000	100001
33.75	110.712	0	15.4955	3.17536e-06	-0.00767396	28.7337	59.2251	30	49.3392	66.4622	100000	100000	100001
33.8	110.712	0	15.4955	3.07583e-06	-0.00760821	28.7336	59.2251	30	49.3392	66.4622	100000	100000	100001
33.85	110.712	0	15.4955	2.97942e-06	-0.00754303	28.7336	59.2251	30	49.3391	66.4622	100000	100000	100001
33.9	110.712	0	15.4954	2.88604e-06	-0.00747841	28.7336	59.2251	30	49.3391	66.4622	100000	100000	100001
33.95	110.712	0	15.4954	2.79558e-06	-0.00741434	28.7336	59.2251	30	49.3391	66.4621	100000	100000	100001
34	110.712	0	15.4954	2.70796e-06	-0.00735082	28.7336	59.2251	30	49.339	66.4621	100000	100000	100001
34.05	110.712	0	15.4954	2.62308e-06	-0.00728784	28.7336	59.2251	30	49.339	66.4621	100000	100000	100001
34.1	110.712	0	15.4953	2.54086e-06	-0.0072254	28.7335	59.2251	30	49.339	66.4621	100000	100000	100001
34.15	110.712	0	15.4953	2.46122e-06	-0.0071635	28.7335	59.2251	30	49.339	66.4621	100000	100000	100001
34.2	110.712	0	15.4953	2.38408e-06	-0.00710213	28.7335	59.2251	30	49.3389	66.462	100000	100000	100001
34.25	110.712	0	15.4953	2.30935e-06	-0.00704129	28.7335	59.2251	30	49.3389	66.462	100000	100000	100001
34.3	110.712	0	15.4952	2.23697e-06	-0.00698096	28.7335	59.2251	30	49.3389	66.462	100000	100000	100001
34.35	110.712	0	15.4952	2.16686e-06	-0.00692116	28.7335	59.2251	30	49.3389	66.462	100000	100000	100001
34.4	110.712	0	15.4952	2.09894e-06	-0.00686186	28.7335	59.2251	30	49.3388	66.462	100000	100000	100001
34.45	110.712	0	15.4952	2.03315e-06	-0.00680307	28.7334	59.2251	30	49.3388	66.4619	100000	100000	100001
34.5	110.712	0	15.4951	1.96943e-06	-0.00674479	28.7334	59.2251	30	49.3388	66.4619	100000	100000	100001
34.55	110.712	0	15.4951	1.9077e-06	-0.00668701	28.7334	59.2251	30	49.3388	66.4619	100000	100000	100001
34.6	110.712	0	15.4951	1.84791e-06	-0.00662972	28.7334	59.2251	30	49.3387	66.4619	100000	100000	100001
34.65	110.712	0	15.4951	1.78999e-06	-0.00657292	28.7334	59.2251	30	49.3387	66.4619	100000	100000	100001
34.7	110.712	0	15.495	1.73388e-06	-0.00651661	28.7334	59.2251	30	49.3387	66.4619	100000	100000	100001
34.75	110.712	0	15.495	1.67954e-06	-0.00646078	28.7334	59.2251	30	49.3387	66.4618	100000	100000	100001
34.8	110.712	0	15.495	1.62689e-06	-0.00640543	28.7333	59.2251	30	49.3386	66.4618	100000	100000	100001
34.85	110.712	0	15.495	1.5759e-06	-0.00635056	28.7333	59.2251	30	49.3386	66.4618	100000	100000	100001
34.9	110.712	0	15.495	1.52651e-06	-0.00629615	28.7333	59.2251	30	49.3386	66.4618	100000	100000	100001
34.95	110.712	0	15.4949	1.47866e-06	-0.00624221	28.7333	59.2251	30	49.3386	66.4618	100000	100000	100001
35	110.712	0	15.4949	1.43232e-06	-0.00618873	28.7333	59.2251	30	49.3385	66.4618	100000	100000	100001
35.05	110.712	0	15.4949	1.38742e-06	-0.00613571	28.7333	59.2251	30	49.3385	66.4617	100000	100000	100001
35.1	110.712	0	15.4949	1.34394e-06	-0.00608315	28.7333	59.2251	30	49.3385	66.4617	100000	100000	100001
35.15	110.712	0	15.4949	1.30181e-06	-0.00603103	28.7333	59.2251	30	49.3385	66.4617	100000	100000	100001
35.2	110.712	0	15.4948	1.26101e-06	-0.00597937	28.7332	59.2251	30	49.3384	66.4617	100000	100000	100001
35.25	110.712	0	15.4948	1.22149e-06	-0.00592814	28.7332	59.2251	30	49.3384	66.4617	100000	100000	100001
35.3	110.712	0	15.4948	1.1832e-06	-0.00587735	28.7332	59.2251	30	49.3384	66.4617	100000	100000	100001
35.35	110.712	0	15.4948	1.14612e-06	-0.005827	28.7332	59.2251	30	49.3384	66.4616	100000	100000	100001
35.4	110.712	0	15.4948	1.11019e-06	-0.00577708	28.7332	59.2251	30	49.3384	66.4616	100000	100000	100001
35.45	110.712	0	15.4947	1.0754e-06	-0.00572759	28.7332	59.2251	30	49.3383	66.4616	100000	100000	100001
35.5	110.712	0	15.4947	1.04169e-06	-0.00567852	28.7332	59.2251	30	49.3383	66.4616	100000	100000	100001
35.55	110.712	0	15.4947	1.00904e-06	-0.00562988	28.7332	59.2251	30	49.3383	66.4616	100000	100000	100001
35.6	110.712	0	15.4947	9.77413e-07	-0.00558164	28.7331	59.2251	30	49.3383	66.4616	100000	100000	100001
35.65	110.712	0	15.4947	9.46778e-07	-0.00553383	28.7331	59.2251	30	49.3382	66.4615	100000	100000	100001
35.7	110.712	0	15.4946	9.17103e-07	-0.00548642	28.7331	59.2251	30	49.3382	66.4615	100000	100000	100001
35.75	110.712	0	15.4946	8.88359e-07	-0.00543942	28.7331	59.2251	30	49.3382	66.4615	100000	100000	100001
35.8	110.712	0	15.4946	8.60515e-07	-0.00539282	28.7331	59.2251	30	49.3382	66.4615	100000	100000	100001
35.85	110.712	0	15.4946	8.33543e-07	-0.00534662	28.7331	59.2251	30	49.3382	66.4615	100000	100000	100001
35.9	110.712	0	15.4946	8.07417e-07	-0.00530081	28.7331	59.2251	30	49.3381	66.4615	100000	100000	100001
35.95	110.712	0	15.4945	7.82111e-07	-0.0052554	28.7331	59.2251	30	49.3381	66.4615	100000	100000	100001
36	110.712	0	15.4945	7.57597e-07	-0.00521038	28.7331	59.2251	30	49.3381	66.4614	100000	100000	100001
36.05	110.712	0	15.4945	7.33852e-07	-0.00516574	28.733	59.2251	30	49.3381	66.4614	100000	100000	100001
36.1	110.712	0	15.4945	7.1085e-07	-0.00512149	28.733	59.2251	30	49.3381	66.4614	100000	100000	100001
36.15	110.712	0	15.4945	6.8857e-07	-0.00507761	28.733	59.2251	30	49.338	66.4614	100000	100000	100001
36.2	110.712	0	15.4945	6.66988e-07	-0.00503411	28.733	59.2251	30	49.338	66.4614	100000	100000	100001
36.25	110.712	0	15.4944	6.46083e-07	-0.00499099	28.733	59.2251	30	49.338	66.4614	100000	100000	100001
36.3	110.712	0	15.4944	6.25833e-07	-0.00494823	28.733	59.2251	30	49.338	66.4614	100000	100000	100001
36.35	110.712	0	15.4944	6.06217e-07	-0.00490584	28.733	59.2251	30	49.338	66.4613	100000	100000	100001
36.4	110.712	0	15.4944	5.87216e-07	-0.00486381	28.733	59.2251	30	49.338	66.4613	100000	100000	100001
36.45	110.712	0	15.4944	5.68811e-07	-0.00482214	28.733	59.2251	30	49.3379	66.4613	100000	100000	100001
36.5	110.712	0	15.4944	5.50983e-07	-0.00478083	28.7329	59.2251	30	49.3379	66.4613	100000	100000	100001
36.55	110.712	0	15.4943	5.33714e-07	-0.00473988	28.7329	59.2251	30	49.3379	66.4613	100000	100000	100001
36.6	110.712	0	15.4943	5.16986e-07	-0.00469927	28.7329	59.2251	30	49.3379	66.4613	100000	100000	100001
36.65	110.712	0	15.4943	5.00782e-07	-0.00465901	28.7329	59.2251	30	49.3379	66.4613	100000	100000	100001
36.7	110.712	0	15.4943	4.85085e-07	-0.0046191	28.7329	59.2251	30	49.3378	66.4613	100000	100000	100001
36.75	110.712	0	15.4943	4.69881e-07	-0.00457953	28.7329	59.2251	30	49.3378	66.4612	100000	100000	100001
36.8	110.712	0	15.4943	4.55154e-07	-0.0045403	28.7329	59.2251	30	49.3378	66.4612	100000	100000	100001
36.85	110.712	0	15.4942	4.40888e-07	-0.0045014	28.7329	59.2251	30	49.3378	66.4612	100000	100000	100001
36.9	110.712	0	15.4942	4.2707e-07	-0.00446284	28.7329	59.2251	30	49.3378	66.4612	100000	100000	100001
36.95	110.712	0	15.4942	4.13684e-07	-0.00442461	28.7329	59.2251	30	49.3378	66.4612	100000	100000	100001
37	110.712	0	15.4942	4.00718e-07	-0.0043867	28.7329	59.2251	30	49.3377	66.4612	100000	100000	100001
37.05	110.712	0	15.4942	3.88158e-07	-0.00434912	28.7328	59.2251	30	49.3377	66.4612	100000	100000	100001
37.1	110.712	0	15.4942	3.75992e-07	-0.00431187	28.7328	59.2251	30	49.3377	66.4612	100000	100000	100001
37.15	110.712	0	15.4942	3.64208e-07	-0.00427493	28.7328	59.2251	30	49.3377	66.4611	100000	100000	100001
37.2	110.712	0	15.4941	3.52792e-07	-0.00423831	28.7328	59.2251	30	49.3377	66.4611	100000	100000	100001
37.25	110.712	0	15.4941	3.41735e-07	-0.004202	28.7328	59.2251	30	49.3377	66.4611	100000	100000	100001
37.3	110.712	0	15.4941	3.31024e-07	-0.004166	28.7328	59.2251	30	49.3377	66.4611	100000	100000	100001
37.35	110.712	0	15.4941	3.20648e-07	-0.00413031	28.7328	59.2251	30	49.3376	66.4611	100000	100000	100001
37.4	110.712	0	15.4941	3.10599e-07	-0.00409493	28.7328	59.2251	30	49.3376	66.4611	100000	100000	100001
37.45	110.712	0	15.4941	3.00864e-07	-0.00405985	28.7328	59.2251	30	49.3376	66.4611	100000	100000	100001
37.5	110.712	0	15.4941	2.91434e-07	-0.00402507	28.7328	59.2251	30	49.3376	66.4611	100000	100000	100001
37.55	110.712	0	15.494	2.82299e-07	-0.00399059	28.7328	59.2251	30	49.3376	66.4611	100000	100000	100001
37.6	110.712	0	15.494	2.73451e-07	-0.0039564	28.7327	59.2251	30	49.3376	66.461	100000	100000	100001
37.65	110.712	0	15.494	2.6488e-07	-0.00392251	28.7327	59.2251	30	49.3375	66.461	100000	100000	100001
37.7	110.712	0	15.494	2.56578e-07	-0.00388891	28.7327	59.2251	30	49.3375	66.461	100000	100000	100001
37.75	110.712	0	15.494	2.48536e-07	-0.00385559	28.7327	59.2251	30	49.3375	66.461	100000	100000	100001
37.8	110.712	0	15.494	2.40746e-07	-0.00382256	28.7327	59.2251	30	49.3375	66.461	100000	100000	100001
37.85	110.712	0	15.494	2.33201e-07	-0.00378981	28.7327	59.2251	30	49.3375	66.461	100000	100000	100001
37.9	110.712	0	15.494	2.25892e-07	-0.00375735	28.7327	59.2251	30	49.3375	66.461	100000	100000	100001
37.95	110.712	0	15.4939	2.18812e-07	-0.00372516	28.7327	59.2251	30	49.3375	66.461	100000	100000	100001
38	110.712	0	15.4939	2.11954e-07	-0.00369325	28.7327	59.2251	30	49.3374	66.461	100000	100000	100001
38.05	110.712	0	15.4939	2.0531e-07	-0.00366161	28.7327	59.2251	30	49.3374	66.461	100000	100000	100001
38.1	110.712	0	15.4939	1.98875e-07	-0.00363024	28.7327	59.2251	30	49.3374	66.4609	100000	100000	100001
38.15	110.712	0	15.4939	1.92642e-07	-0.00359914	28.7327	59.2251	30	49.3374	66.4609	100000	100000	100001
38.2	110.712	0	15.4939	1.86604e-07	-0.00356831	28.7327	59.2251	30	49.3374	66.4609	100000	100000	100001
38.25	110.712	0	15.4939	1.80755e-07	-0.00353774	28.7326	59.2251	30	49.3374	66.4609	100000	100000	100001
38.3	110.712	0	15.4939	1.7509e-07	-0.00350744	28.7326	59.2251	30	49.3374	66.4609	100000	100000	100001
38.35	110.712	0	15.4938	1.69602e-07	-0.00347739	28.7326	59.2251	30	49.3374	66.4609	100000	100000	100001
38.4	110.712	0	15.4938	1.64286e-07	-0.0034476	28.7326	59.2251	30	49.3373	66.4609	100000	100000	100001
38.45	110.712	0	15.4938	1.59137e-07	-0.00341807	28.7326	59.2251	30	49.3373	66.4609	100000	100000	100001
38.5	110.712	0	15.4938	1.54149e-07	-0.00338879	28.7326	59.2251	30	49.3373	66.4609	100000	100000	100001
38.55	110.712	0	15.4938	1.49318e-07	-0.00335976	28.7326	59.2251	30	49.3373	66.4609	100000	100000	100001
38.6	110.712	0	15.4938	1.44638e-07	-0.00333097	28.7326	59.2251	30	49.3373	66.4608	100000	100000	100001
38.65	110.712	0	15.4938	1.40104e-07	-0.00330244	28.7326	59.2251	30	49.3373	66.4608	100000	100000	100001
38.7	110.712	0	15.4938	1.35713e-07	-0.00327415	28.7326	59.2251	30	49.3373	66.4608	100000	100000	100001
38.75	110.712	0	15.4937	1.3146e-07	-0.0032461	28.7326	59.2251	30	49.3372	66.4608	100000	100000	100001
38.8	110.712	0	15.4937	1.27339e-07	-0.00321829	28.7326	59.2251	30	49.3372	66.4608	100000	100000	100001
38.85	110.712	0	15.4937	1.23348e-07	-0.00319072	28.7326	59.2251	30	49.3372	66.4608	100000	100000	100001
38.9	110.712	0	15.4937	1.19482e-07	-0.00316339	28.7326	59.2251	30	49.3372	66.4608	100000	100000	100001
38.95	110.712	0	15.4937	1.15737e-07	-0.00313629	28.7325	59.2251	30	49.3372	66.4608	100000	100000	100001
39	110.712	0	15.4937	1.1211e-07	-0.00310942	28.7325	59.2251	30	49.3372	66.4608	100000	100000	100001
39.05	110.712	0	15.4937	1.08596e-07	-0.00308279	28.7325	59.2251	30	49.3372	66.4608	100000	100000	100001
39.1	110.712	0	15.4937	1.05192e-07	-0.00305638	28.7325	59.2251	30	49.3372	66.4608	100000	100000	100001
39.15	110.712	0	15.4937	1.01895e-07	-0.0030302	28.7325	59.2251	30	49.3372	66.4608	100000	100000	100001
39.2	110.712	0	15.4937	9.87015e-08	-0.00300424	28.7325	59.2251	30	49.3371	66.4607	100000	100000	100001
39.25	110.712	0	15.4936	9.56079e-08	-0.0029785	28.7325	59.2251	30	49.3371	66.4607	100000	100000	100001
39.3	110.712	0	15.4936	9.26114e-08	-0.00295299	28.7325	59.2251	30	49.3371	66.4607	100000	100000	100001
39.35	110.712	0	15.4936	8.97087e-08	-0.00292769	28.7325	59.2251	30	49.3371	66.4607	100000	100000	100001
39.4	110.712	0	15.4936	8.68971e-08	-0.00290261	28.7325	59.2251	30	49.3371	66.4607	100000	100000	100001
39.45	110.712	0	15.4936	8.41736e-08	-0.00287775	28.7325	59.2251	30	49.3371	66.4607	100000	100000	100001
39.5	110.712	0	15.4936	8.15355e-08	-0.00285309	28.7325	59.2251	30	49.3371	66.4607	100000	100000	100001
39.55	110.712	0	15.4936	7.89801e-08	-0.00282865	28.7325	59.2251	30	49.3371	66.4607	100000	100000	100001
39.6	110.712	0	15.4936	7.65048e-08	-0.00280442	28.7325	59.2251	30	49.3371	66.4607	100000	100000	100001
39.65	110.712	0	15.4936	7.41071e-08	-0.0027804	28.7325	59.2251	30	49.337	66.4607	100000	100000	100001
39.7	110.712	0	15.4936	7.17845e-08	-0.00275658	28.7325	59.2251	30	49.337	66.4607	100000	100000	100001
39.75	110.712	0	15.4935	6.95347e-08	-0.00273297	28.7324	59.2251	30	49.337	66.4607	100000	100000	100001
39.8	110.712	0	15.4935	6.73554e-08	-0.00270955	28.7324	59.2251	30	49.337	66.4607	100000	100000	100001
39.85	110.712	0	15.4935	6.52444e-08	-0.00268634	28.7324	59.2251	30	49.337	66.4606	100000	100000	100001
39.9	110.712	0	15.4935	6.31997e-08	-0.00266333	28.7324	59.2251	30	49.337	66.4606	100000	100000	100001
39.95	110.712	0	15.4935	6.1219e-08	-0.00264052	28.7324	59.2251	30	49.337	66.4606	100000	100000	100001
40	110.712	0	15.4935	5.93003e-08	-0.0026179	28.7324	59.2251	30	49.337	66.4606	100000	100000	100001
40.05	110.712	0	15.4935	5.74418e-08	-0.00259547	28.7324	59.2251	30	49.337	66.4606	100000	100000	100001
40.1	110.712	0	15.4935	5.56416e-08	-0.00257324	28.7324	59.2251	30	49.337	66.4606	100000	100000	100001
40.15	110.712	0	15.4935	5.38978e-08	-0.00255119	28.7324	59.2251	30	49.3369	66.4606	100000	100000	100001
40.2	110.712	0	15.4935	5.22086e-08	-0.00252934	28.7324	59.2251	30	49.3369	66.4606	100000	100000	100001
40.25	110.712	0	15.4935	5.05724e-08	-0.00250767	28.7324	59.2251	30	49.3369	66.4606	100000	100000	100001
40.3	110.712	0	15.4934	4.89874e-08	-0.00248619	28.7324	59.2251	30	49.3369	66.4606	100000	100000	100001
40.35	110.712	0	15.4934	4.7452e-08	-0.00246489	28.7324	59.2251	30	49.3369	66.4606	100000	100000	100001
40.4	110.712	0	15.4934	4.59649e-08	-0.00244378	28.7324	59.2251	30	49.3369	66.4606	100000	100000	100001
40.45	110.712	0	15.4934	4.45243e-08	-0.00242284	28.7324	59.2251	30	49.3369	66.4606	100000	100000	100001
40.5	110.712	0	15.4934	4.31289e-08	-0.00240209	28.7324	59.2251	30	49.3369	66.4606	100000	100000	100001
40.55	110.712	0	15.4934	4.17772e-08	-0.00238151	28.7324	59.2251	30	49.3369	66.4605	100000	100000	100001
40.6	110.712	0	15.4934	4.04678e-08	-0.00236111	28.7324	59.2251	30	49.3369	66.4605	100000	100000	100001
40.65	110.712	0	15.4934	3.91995e-08	-0.00234088	28.7323	59.2251	30	49.3369	66.4605	100000	100000	100001
40.7	110.712	0	15.4934	3.7971e-08	-0.00232083	28.7323	59.2251	30	49.3368	66.4605	100000	100000	100001
40.75	110.712	0	15.4934	3.6781e-08	-0.00230095	28.7323	59.2251	30	49.3368	66.4605	100000	100000	100001
40.8	110.712	0	15.4934	3.56282e-08	-0.00228124	28.7323	59.2251	30	49.3368	66.4605	100000	100000	100001
40.85	110.712	0	15.4934	3.45116e-08	-0.0022617	28.7323	59.2251	30	49.3368	66.4605	100000	100000	100001
40.9	110.712	0	15.4934	3.34299e-08	-0.00224232	28.7323	59.2251	30	49.3368	66.4605	100000	100000	100001
40.95	110.712	0	15.4933	3.23822e-08	-0.00222312	28.7323	59.2251	30	49.3368	66.4605	100000	100000	100001
41	110.712	0	15.4933	3.13673e-08	-0.00220407	28.7323	59.2251	30	49.3368	66.4605	100000	100000	100001
41.05	110.712	0	15.4933	3.03842e-08	-0.00218519	28.7323	59.2251	30	49.3368	66.4605	100000	100000	100001
41.1	110.712	0	15.4933	2.9432e-08	-0.00216647	28.7323	59.2251	30	49.3368	66.4605	100000	100000	100001
41.15	110.712	0	15.4933	2.85096e-08	-0.00214791	28.7323	59.2251	30	49.3368	66.4605	100000	100000	100001
41.2	110.712	0	15.4933	2.7616e-08	-0.00212951	28.7323	59.2251	30	49.3368	66.4605	100000	100000	100001
41.25	110.712	0	15.4933	2.67505e-08	-0.00211127	28.7323	59.2251	30	49.3368	66.4605	100000	100000	100001
41.3	110.712	0	15.4933	2.59122e-08	-0.00209319	28.7323	59.2251	30	49.3367	66.4605	100000	100000	100001
41.35	110.712	0	15.4933	2.51001e-08	-0.00207525	28.7323	59.2251	30	49.3367	66.4604	100000	100000	100001
41.4	110.712	0	15.4933	2.43134e-08	-0.00205748	28.7323	59.2251	30	49.3367	66.4604	100000	100000	100001
41.45	110.712	0	15.4933	2.35514e-08	-0.00203985	28.7323	59.2251	30	49.3367	66.4604	100000	100000	100001
41.5	110.712	0	15.4933	2.28133e-08	-0.00202238	28.7323	59.2251	30	49.3367	66.4604	100000	100000	100001
41.55	110.712	0	15.4933	2.20983e-08	-0.00200505	28.7323	59.2251	30	49.3367	66.4604	100000	100000	100001
41.6	110.712	0	15.4932	2.14058e-08	-0.00198788	28.7323	59.2251	30	49.3367	66.4604	100000	100000	100001
41.65	110.712	0	15.4932	2.07349e-08	-0.00197085	28.7323	59.2251	30	49.3367	66.4604	100000	100000	100001
41.7	110.712	0	15.4932	2.00851e-08	-0.00195397	28.7323	59.2251	30	49.3367	66.4604	100000	100000	100001
41.75	110.712	0	15.4932	1.94556e-08	-0.00193723	28.7323	59.2251	30	49.3367	66.4604	100000	100000	100001
41.8	110.712	0	15.4932	1.88458e-08	-0.00192063	28.7322	59.2251	30	49.3367	66.4604	100000	100000	100001
41.85	110.712	0	15.4932	1.82552e-08	-0.00190418	28.7322	59.2251	30	49.3367	66.4604	100000	100000	100001
41.9	110.712	0	15.4932	1.76831e-08	-0.00188787	28.7322	59.2251	30	49.3367	66.4604	100000	100000	100001
41.95	110.712	0	15.4932	1.71289e-08	-0.0018717	28.7322	59.2251	30	49.3366	66.4604	100000	100000	100001
42	110.712	0	15.4932	1.6592e-08	-0.00185567	28.7322	59.2251	30	49.3366	66.4604	100000	100000	100001
42.05	110.712	0	15.4932	1.6072e-08	-0.00183977	28.7322	59.2251	30	49.3366	66.4604	100000	100000	100001
42.1	110.712	0	15.4932	1.55683e-08	-0.00182401	28.7322	59.2251	30	49.3366	66.4604	100000	100000	100001
42.15	110.712	0	15.4932	1.50804e-08	-0.00180838	28.7322	59.2251	30	49.3366	66.4604	100000	100000	100001
42.2	110.712	0	15.4932	1.46078e-08	-0.00179289	28.7322	59.2251	30	49.3366	66.4604	100000	100000	100001
42.25	110.712	0	15.4932	1.415e-08	-0.00177754	28.7322	59.2251	30	49.3366	66.4604	100000	100000	100001
42.3	110.712	0	15.4932	1.37065e-08	-0.00176231	28.7322	59.2251	30	49.3366	66.4603	100000	100000	100001
42.35	110.712	0	15.4932	1.32769e-08	-0.00174721	28.7322	59.2251	30	49.3366	66.4603	100000	100000	100001
42.4	110.712	0	15.4931	1.28608e-08	-0.00173225	28.7322	59.2251	30	49.3366	66.4603	100000	100000	100001
42.45	110.712	0	15.4931	1.24577e-08	-0.00171741	28.7322	59.2251	30	49.3366	66.4603	100000	100000	100001
42.5	110.712	0	15.4931	1.20673e-08	-0.00170269	28.7322	59.2251	30	49.3366	66.4603	100000	100000	100001
42.55	110.712	0	15.4931	1.16891e-08	-0.00168811	28.7322	59.2251	30	49.3366	66.4603	100000	100000	100001
42.6	110.712	0	15.4931	1.13228e-08	-0.00167365	28.7322	59.2251	30	49.3366	66.4603	100000	100000	100001
42.65	110.712	0	15.4931	1.09679e-08	-0.00165931	28.7322	59.2251	30	49.3366	66.4603	100000	100000	100001
42.7	110.712	0	15.4931	1.06243e-08	-0.0016451	28.7322	59.2251	30	49.3365	66.4603	100000	100000	100001
42.75	110.712	0	15.4931	1.02914e-08	-0.00163101	28.7322	59.2251	30	49.3365	66.4603	100000	100000	100001
42.8	110.712	0	15.4931	9.9689e-09	-0.00161703	28.7322	59.2251	30	49.3365	66.4603	100000	100000	100001
42.85	110.712	0	15.4931	9.65656e-09	-0.00160318	28.7322	59.2251	30	49.3365	66.4603	100000	100000	100001
42.9	110.712	0	15.4931	9.35402e-09	-0.00158945	28.7322	59.2251	30	49.3365	66.4603	100000	100000	100001
42.95	110.712	0	15.4931	9.06096e-09	-0.00157583	28.7322	59.2251	30	49.3365	66.4603	100000	100000	100001
43	110.712	0	15.4931	8.77706e-09	-0.00156234	28.7322	59.2251	30	49.3365	66.4603	100000	100000	100001
43.05	110.712	0	15.4931	8.50211e-09	-0.00154895	28.7322	59.2251	30	49.3365	66.4603	100000	100000	100001
43.1	110.712	0	15.4931	8.23585e-09	-0.00153568	28.7322	59.2251	30	49.3365	66.4603	100000	100000	100001
43.15	110.712	0	15.4931	7.97794e-09	-0.00152253	28.7321	59.2251	30	49.3365	66.4603	100000	100000	100001
43.2	110.712	0	15.4931	7.72814e-09	-0.00150949	28.7321	59.2251	30	49.3365	66.4603	100000	100000	100001
43.25	110.712	0	15.4931	7.48616e-09	-0.00149656	28.7321	59.2251	30	49.3365	66.4603	100000	100000	100001
43.3	110.712	0	15.493	7.25174e-09	-0.00148374	28.7321	59.2251	30	49.3365	66.4603	100000	100000	100001
43.35	110.712	0	15.493	7.02464e-09	-0.00147103	28.7321	59.2251	30	49.3365	66.4603	100000	100000	100001
43.4	110.712	0	15.493	6.8046e-09	-0.00145843	28.7321	59.2251	30	49.3365	66.4603	100000	100000	100001
43.45	110.712	0	15.493	6.59138e-09	-0.00144593	28.7321	59.2251	30	49.3365	66.4602	100000	100000	100001
43.5	110.712	0	15.493	6.38495e-09	-0.00143355	28.7321	59.2251	30	49.3365	66.4602	100000	100000	100001
43.55	110.712	0	15.493	6.18506e-09	-0.00142127	28.7321	59.2251	30	49.3365	66.4602	100000	100000	100001
43.6	110.712	0	15.493	5.99143e-09	-0.00140909	28.7321	59.2251	30	49.3364	66.4602	100000	100000	100001
43.65	110.712	0	15.493	5.80385e-09	-0.00139702	28.7321	59.2251	30	49.3364	66.4602	100000	100000	100001
43.7	110.712	0	15.493	5.62214e-09	-0.00138505	28.7321	59.2251	30	49.3364	66.4602	100000	100000	100001
43.75	110.712	0	15.493	5.44609e-09	-0.00137319	28.7321	59.2251	30	49.3364	66.4602	100000	100000	100001
43.8	110.712	0	15.493	5.27552e-09	-0.00136143	28.7321	59.2251	30	49.3364	66.4602	100000	100000	100001
43.85	110.712	0	15.493	5.11024e-09	-0.00134977	28.7321	59.2251	30	49.3364	66.4602	100000	100000	100001
43.9	110.712	0	15.493	4.95007e-09	-0.0013382	28.7321	59.2251	30	49.3364	66.4602	100000	100000	100001
43.95	110.712	0	15.493	4.79502e-09	-0.00132674	28.7321	59.2251	30	49.3364	66.4602	100000	100000	100001
44	110.712	0	15.493	4.64484e-09	-0.00131537	28.7321	59.2251	30	49.3364	66.4602	100000	100000	100001
44.05	110.712	0	15.493	4.49934e-09	-0.00130411	28.7321	59.2251	30	49.3364	66.4602	100000	100000	100001
44.1	110.712	0	15.493	4.3584e-09	-0.00129294	28.7321	59.2251	30	49.3364	66.4602	100000	100000	100001
44.15	110.712	0	15.493	4.22186e-09	-0.00128186	28.7321	59.2251	30	49.3364	66.4602	100000	100000	100001
44.2	110.712	0	15.493	4.08958e-09	-0.00127088	28.7321	59.2251	30	49.3364	66.4602	100000	100000	100001
44.25	110.712	0	15.493	3.96142e-09	-0.00125999	28.7321	59.2251	30	49.3364	66.4602	100000	100000	100001
44.3	110.712	0	15.493	3.83726e-09	-0.0012492	28.7321	59.2251	30	49.3364	66.4602	100000	100000	100001
44.35	110.712	0	15.493	3.71698e-09	-0.0012385	28.7321	59.2251	30	49.3364	66.4602	100000	100000	100001
44.4	110.712	0	15.4929	3.6005e-09	-0.00122789	28.7321	59.2251	30	49.3364	66.4602	100000	100000	100001
44.45	110.712	0	15.4929	3.48767e-09	-0.00121737	28.7321	59.2251	30	49.3364	66.4602	100000	100000	100001
44.5	110.712	0	15.4929	3.37839e-09	-0.00120694	28.7321	59.2251	30	49.3364	66.4602	100000	100000	100001
44.55	110.712	0	15.4929	3.27253e-09	-0.00119661	28.7321	59.2251	30	49.3364	66.4602	100000	100000	100001
44.6	110.712	0	15.4929	3.17e-09	-0.00118636	28.7321	59.2251	30	49.3363	66.4602	100000	100000	100001
44.65	110.712	0	15.4929	3.07069e-09	-0.00117619	28.7321	59.2251	30	49.3363	66.4602	100000	100000	100001
44.7	110.712	0	15.4929	2.97451e-09	-0.00116612	28.7321	59.2251	30	49.3363	66.4602	100000	100000	100001
44.75	110.712	0	15.4929	2.88134e-09	-0.00115613	28.7321	59.2251	30	49.3363	66.4602	100000	100000	100001
44.8	110.712	0	15.4929	2.79111e-09	-0.00114623	28.7321	59.2251	30	49.3363	66.4602	100000	100000	100001
44.85	110.712	0	15.4929	2.70371e-09	-0.00113641	28.7321	59.2251	30	49.3363	66.4602	100000	100000	100001
44.9	110.712	0	15.4929	2.61906e-09	-0.00112667	28.7321	59.2251	30	49.3363	66.4601	100000	100000	100001
44.95	110.712	0	15.4929	2.53706e-09	-0.00111702	28.732	59.2251	30	49.3363	66.4601	100000	100000	100001
45	110.712	0	15.4929	2.45763e-09	-0.00110745	28.732	59.2251	30	49.3363	66.4601	100000	100000	100001
45.05	110.712	0	15.4929	2.38068e-09	-0.00109797	28.732	59.2251	30	49.3363	66.4601	100000	100000	100001
45.1	110.712	0	15.4929	2.30614e-09	-0.00108856	28.732	59.2251	30	49.3363	66.4601	100000	100000	100001
45.15	110.712	0	15.4929	2.23391e-09	-0.00107924	28.732	59.2251	30	49.3363	66.4601	100000	100000	100001
45.2	110.712	0	15.4929	2.16392e-09	-0.00106999	28.732	59.2251	30	49.3363	66.4601	100000	100000	100001
45.25	110.712	0	15.4929	2.09619e-09	-0.00106083	28.732	59.2251	30	49.3363	66.4601	100000	100000	100001
45.3	110.712	0	15.4929	2.03069e-09	-0.00105174	28.732	59.2251	30	49.3363	66.4601	100000	100000	100001
45.35	110.712	0	15.4929	1.96728e-09	-0.00104273	28.732	59.2251	30	49.3363	66.4601	100000	100000	100001
45.4	110.712	0	15.4929	1.90589e-09	-0.0010338	28.732	59.2251	30	49.3363	66.4601	100000	100000	100001
45.45	110.712	0	15.4929	1.84645e-09	-0.00102494	28.732	59.2251	30	49.3363	66.4601	100000	100000	100001
45.5	110.712	0	15.4929	1.7889e-09	-0.00101616	28.732	59.2251	30	49.3363	66.4601	100000	100000	100001
45.55	110.712	0	15.4929	1.73317e-09	-0.00100746	28.732	59.2251	30	49.3363	66.4601	100000	100000	100001
45.6	110.712	0	15.4929	1.6792e-09	-0.000998828	28.732	59.2251	30	49.3363	66.4601	100000	100000	100001
45.65	110.712	0	15.4929	1.62693e-09	-0.000990272	28.732	59.2251	30	49.3363	66.4601	100000	100000	100001
45.7	110.712	0	15.4929	1.57628e-09	-0.00098179	28.732	59.2251	30	49.3363	66.4601	100000	100000	100001
45.75	110.712	0	15.4928	1.52718e-09	-0.00097338	28.732	59.2251	30	49.3363	66.4601	100000	100000	100001
45.8	110.712	0	15.4928	1.47958e-09	-0.000965042	28.732	59.2251	30	49.3363	66.4601	100000	100000	100001
45.85	110.712	0	15.4928	1.43339e-09	-0.000956775	28.732	59.2251	30	49.3362	66.4601	100000	100000	100001
45.9	110.712	0	15.4928	1.38855e-09	-0.000948579	28.732	59.2251	30	49.3362	66.4601	100000	100000	100001
45.95	110.712	0	15.4928	1.34498e-09	-0.000940454	28.732	59.2251	30	49.3362	66.4601	100000	100000	100001
46	110.712	0	15.4928	1.30304e-09	-0.000932398	28.732	59.2251	30	49.3362	66.4601	100000	100000	100001
46.05	110.712	0	15.4928	1.26246e-09	-0.000924411	28.732	59.2251	30	49.3362	66.4601	100000	100000	100001
46.1	110.712	0	15.4928	1.22313e-09	-0.000916493	28.732	59.2251	30	49.3362	66.4601	100000	100000	100001
46.15	110.712	0	15.4928	1.18501e-09	-0.000908642	28.732	59.2251	30	49.3362	66.4601	100000	100000	100001
46.2	110.712	0	15.4928	1.14806e-09	-0.000900859	28.732	59.2251	30	49.3362	66.4601	100000	100000	100001
46.25	110.712	0	15.4928	1.11225e-09	-0.000893142	28.732	59.2251	30	49.3362	66.4601	100000	100000	100001
46.3	110.712	0	15.4928	1.07751e-09	-0.000885491	28.732	59.2251	30	49.3362	66.4601	100000	100000	100001
46.35	110.712	0	15.4928	1.04382e-09	-0.000877906	28.732	59.2251	30	49.3362	66.4601	100000	100000	100001
46.4	110.712	0	15.4928	1.01114e-09	-0.000870386	28.732	59.2251	30	49.3362	66.4601	100000	100000	100001
46.45	110.712	0	15.4928	9.79421e-10	-0.00086293	28.732	59.2251	30	49.3362	66.4601	100000	100000	100001
46.5	110.712	0	15.4928	9.48641e-10	-0.000855539	28.732	59.2251	30	49.3362	66.4601	100000	100000	100001
46.55	110.712	0	15.4928	9.18892e-10	-0.00084821	28.732	59.2251	30	49.3362	66.4601	100000	100000	100001
46.6	110.712	0	15.4928	8.90053e-10	-0.000840944	28.732	59.2251	30	49.3362	66.4601	100000	100000	100001
46.65	110.712	0	15.4928	8.62098e-10	-0.000833741	28.732	59.2251	30	49.3362	66.4601	100000	100000	100001
46.7	110.712	0	15.4928	8.35002e-10	-0.000826599	28.732	59.2251	30	49.3362	66.4601	100000	100000	100001
46.75	110.712	0	15.4928	8.08741e-10	-0.000819519	28.732	59.2251	30	49.3362	66.46	100000	100000	100001
46.8	110.712	0	15.4928	7.83296e-10	-0.000812499	28.732	59.2251	30	49.3362	66.46	100000	100000	100001
46.85	110.712	0	15.4928	7.58644e-10	-0.000805539	28.732	59.2251	30	49.3362	66.46	100000	100000	100001
46.9	110.712	0	15.4928	7.34768e-10	-0.000798639	28.732	59.2251	30	49.3362	66.46	100000	100000	100001
46.95	110.712	0	15.4928	7.1165e-10	-0.000791797	28.732	59.2251	30	49.3362	66.46	100000	100000	100001
47	110.712	0	15.4928	6.89275e-10	-0.000785015	28.732	59.2251	30	49.3362	66.46	100000	100000	100001
47.05	110.712	0	15.4928	6.67602e-10	-0.000778291	28.732	59.2251	30	49.3362	66.46	100000	100000	100001
47.1	110.712	0	15.4928	6.46554e-10	-0.000771624	28.732	59.2251	30	49.3362	66.46	100000	100000	100001
47.15	110.712	0	15.4928	6.26167e-10	-0.000765014	28.732	59.2251	30	49.3362	66.46	100000	100000	100001
47.2	110.712	0	15.4928	6.06424e-10	-0.000758461	28.732	59.2251	30	49.3362	66.46	100000	100000	100001
47.25	110.712	0	15.4928	5.87306e-10	-0.000751964	28.732	59.2251	30	49.3362	66.46	100000	100000	100001
47.3	110.712	0	15.4928	5.68798e-10	-0.000745523	28.732	59.2251	30	49.3362	66.46	100000	100000	100001
47.35	110.712	0	15.4928	5.50884e-10	-0.000739137	28.732	59.2251	30	49.3362	66.46	100000	100000	100001
47.4	110.712	0	15.4928	5.33547e-10	-0.000732805	28.732	59.2251	30	49.3362	66.46	100000	100000	100001
47.45	110.712	0	15.4927	5.16773e-10	-0.000726528	28.732	59.2251	30	49.3361	66.46	100000	100000	100001
47.5	110.712	0	15.4927	5.00548e-10	-0.000720305	28.732	59.2251	30	49.3361	66.46	100000	100000	100001
47.55	110.712	0	15.4927	4.84857e-10	-0.000714135	28.732	59.2251	30	49.3361	66.46	100000	100000	100001
47.6	110.712	0	15.4927	4.69663e-10	-0.000708017	28.7319	59.2251	30	49.3361	66.46	100000	100000	100001
47.65	110.712	0	15.4927	4.54939e-10	-0.000701952	28.7319	59.2251	30	49.3361	66.46	100000	100000	100001
47.7	110.712	0	15.4927	4.40687e-10	-0.00069594	28.7319	59.2251	30	49.3361	66.46	100000	100000	100001
47.75	110.712	0	15.4927	4.26891e-10	-0.000689978	28.7319	59.2251	30	49.3361	66.46	100000	100000	100001
47.8	110.712	0	15.4927	4.13533e-10	-0.000684068	28.7319	59.2251	30	49.3361	66.46	100000	100000	100001
47.85	110.712	0	15.4927	4.00597e-10	-0.000678208	28.7319	59.2251	30	49.3361	66.46	100000	100000	100001
47.9	110.712	0	15.4927	3.88065e-10	-0.000672399	28.7319	59.2251	30	49.3361	66.46	100000	100000	100001
47.95	110.712	0	15.4927	3.75919e-10	-0.000666639	28.7319	59.2251	30	49.3361	66.46	100000	100000	100001
48	110.712	0	15.4927	3.64141e-10	-0.000660929	28.7319	59.2251	30	49.3361	66.46	100000	100000	100001
48.05	110.712	0	15.4927	3.52712e-10	-0.000655267	28.7319	59.2251	30	49.3361	66.46	100000	100000	100001

## Sheet: RI_FP8
Time	RI	FP	BH	fructose	formate	acetate	butyrate	unknown compound	H20	CO2	lag_RI	lag_FP	lag_BH
0.05	1.19608	0.0707242	0	48.9072	-3.76084e-05	48.5032	2.15049	30	0.00831343	0.0401389	0.11121	1.12733e-05	0.109543
0.1	1.19954	0.0707242	0	48.906	-7.91021e-05	48.5023	2.15231	30	0.00935203	0.0418699	0.123677	1.27087e-05	0.119998
0.15	1.20335	0.0707243	0	48.9046	-0.000124846	48.5013	2.15433	30	0.0104971	0.0437784	0.137541	1.43269e-05	0.131449
0.2	1.20756	0.0707243	0	48.9031	-0.000175232	48.5002	2.15655	30	0.0117583	0.0458805	0.152959	1.61511e-05	0.143994
0.25	1.21218	0.0707243	0	48.9014	-0.000230681	48.4989	2.15899	30	0.0131463	0.048194	0.170107	1.82077e-05	0.157736
0.3	1.21727	0.0707244	0	48.8995	-0.000291638	48.4976	2.16168	30	0.0146723	0.0507373	0.189176	2.05261e-05	0.172789
0.35	1.22286	0.0707244	0	48.8975	-0.000358579	48.4961	2.16463	30	0.0163481	0.0535305	0.210383	2.31398e-05	0.18928
0.4	1.22898	0.0707245	0	48.8953	-0.000432006	48.4945	2.16786	30	0.0181864	0.0565943	0.233968	2.60863e-05	0.207344
0.45	1.2357	0.0707246	0	48.8928	-0.000512446	48.4927	2.17141	30	0.0202003	0.059951	0.260197	2.9408e-05	0.227131
0.5	1.24304	0.0707247	0	48.8901	-0.000600452	48.4908	2.17529	30	0.0224038	0.0636235	0.289365	3.31526e-05	0.248808
0.55	1.25107	0.0707247	0	48.8872	-0.000696597	48.4887	2.17952	30	0.0248111	0.0676359	0.321804	3.7374e-05	0.272552
0.6	1.25982	0.0707248	0	48.884	-0.000801477	48.4864	2.18415	30	0.0274373	0.072013	0.357879	4.2133e-05	0.298563
0.65	1.26936	0.070725	0	48.8806	-0.000915703	48.4838	2.18918	30	0.0302977	0.0767804	0.397999	4.74979e-05	0.327057
0.7	1.27972	0.0707251	0	48.8768	-0.0010399	48.4811	2.19465	30	0.0334079	0.0819644	0.442616	5.3546e-05	0.358269
0.75	1.29098	0.0707252	0	48.8727	-0.0011747	48.4781	2.2006	30	0.0367839	0.0875913	0.492234	6.03642e-05	0.392461
0.8	1.30317	0.0707254	0	48.8683	-0.00132075	48.4749	2.20703	30	0.0404418	0.093688	0.547415	6.80506e-05	0.429915
0.85	1.31636	0.0707256	0	48.8635	-0.00147867	48.4714	2.214	30	0.0443976	0.100281	0.608782	7.67157e-05	0.470944
0.9	1.33059	0.0707258	0	48.8583	-0.00164911	48.4677	2.22151	30	0.0486671	0.107397	0.677029	8.64842e-05	0.515889
0.95	1.34592	0.070726	0	48.8527	-0.00183269	48.4636	2.22961	30	0.0532662	0.115063	0.752926	9.74966e-05	0.565122
1	1.3624	0.0707263	0	48.8467	-0.00203001	48.4593	2.23831	30	0.0582102	0.123303	0.837331	0.000109911	0.619055
1.05	1.38008	0.0707265	0	48.8403	-0.00224166	48.4546	2.24764	30	0.0635138	0.132143	0.931198	0.000123907	0.678134
1.1	1.399	0.0707269	0	48.8334	-0.00246821	48.4496	2.25764	30	0.0691914	0.141606	1.03559	0.000139684	0.742852
1.15	1.41922	0.0707272	0	48.826	-0.00271019	48.4443	2.26831	30	0.0752566	0.151716	1.15168	0.00015747	0.813746
1.2	1.44077	0.0707277	0	48.8182	-0.00296811	48.4386	2.27969	30	0.0817223	0.162492	1.28079	0.000177522	0.891405
1.25	1.4637	0.0707281	0	48.8098	-0.00324245	48.4325	2.2918	30	0.0886005	0.173957	1.42437	0.000200126	0.976476
1.3	1.48804	0.0707287	0	48.801	-0.00353364	48.4261	2.30465	30	0.0959027	0.186128	1.58404	0.000225609	1.06967
1.35	1.51383	0.0707293	0	48.7916	-0.00384209	48.4193	2.31827	30	0.103639	0.199023	1.76162	0.000254336	1.17175
1.4	1.5411	0.0707299	0	48.7816	-0.00416817	48.4121	2.33267	30	0.11182	0.212658	1.9591	0.000286722	1.28358
1.45	1.56987	0.0707307	0	48.7712	-0.00451223	48.4045	2.34787	30	0.120453	0.227049	2.17873	0.000323231	1.40607
1.5	1.60019	0.0707316	0	48.7601	-0.00487457	48.3965	2.36388	30	0.129548	0.242208	2.42297	0.00036439	1.54026
1.55	1.63207	0.0707325	0	48.7485	-0.00525548	48.3881	2.38071	30	0.139111	0.258148	2.69459	0.000410789	1.68726
1.6	1.66553	0.0707336	0	48.7363	-0.00565521	48.3792	2.39838	30	0.149151	0.274882	2.99666	0.000463096	1.84828
1.65	1.7006	0.0707349	0	48.7236	-0.006074	48.37	2.4169	30	0.159672	0.29242	3.3326	0.000522064	2.02467
1.7	1.7373	0.0707362	0	48.7102	-0.00651206	48.3603	2.43628	30	0.170682	0.310772	3.70619	0.00058854	2.21789
1.75	1.77565	0.0707378	0	48.6962	-0.0069696	48.3502	2.45653	30	0.182186	0.329948	4.12167	0.000663481	2.42956
1.8	1.81567	0.0707396	0	48.6817	-0.0074468	48.3396	2.47766	30	0.194191	0.349958	4.58372	0.000747964	2.66142
1.85	1.85737	0.0707416	0	48.6665	-0.00794385	48.3286	2.49969	30	0.206701	0.370811	5.09757	0.000843205	2.91542
1.9	1.90077	0.0707438	0	48.6507	-0.00846092	48.3172	2.52261	30	0.219722	0.392516	5.66902	0.000950573	3.19365
1.95	1.94589	0.0707463	0	48.6343	-0.00899817	48.3052	2.54644	29.9999	0.233259	0.415083	6.30453	0.00107161	3.49843
2	1.99276	0.0707492	0	48.6172	-0.00955579	48.2929	2.57119	29.9999	0.247319	0.438521	7.01129	0.00120806	3.8323
2.05	2.04139	0.0707524	0	48.5995	-0.0101339	48.2801	2.59688	29.9999	0.261908	0.46284	7.79728	0.00136189	4.19804
2.1	2.0918	0.070756	0	48.5811	-0.0107328	48.2668	2.6235	29.9999	0.277031	0.488051	8.67138	0.00153531	4.59868
2.15	2.14402	0.0707601	0	48.5621	-0.0113525	48.253	2.65108	29.9999	0.292696	0.514165	9.64347	0.0017308	5.03755
2.2	2.19806	0.0707647	0	48.5424	-0.0119933	48.2387	2.67963	29.9999	0.308909	0.541194	10.7245	0.00195119	5.51831
2.25	2.25395	0.0707698	0	48.5221	-0.0126553	48.224	2.70915	29.9999	0.325677	0.569149	11.9268	0.00219964	6.04495
2.3	2.31173	0.0707757	0	48.501	-0.0133387	48.2088	2.73967	29.9999	0.343009	0.598044	13.2638	0.00247973	6.62185
2.35	2.3714	0.0707822	0	48.4793	-0.0140438	48.193	2.77119	29.9999	0.360912	0.627893	14.7507	0.00279549	7.25381
2.4	2.43301	0.0707896	0	48.4569	-0.0147707	48.1768	2.80374	29.9998	0.379395	0.65871	16.4043	0.00315145	7.94607
2.45	2.49659	0.070798	0	48.4337	-0.0155195	48.16	2.83733	29.9998	0.398469	0.690512	18.2433	0.00355273	8.7044
2.5	2.56217	0.0708074	0	48.4098	-0.0162906	48.1428	2.87197	29.9998	0.418141	0.723314	20.2884	0.00400511	9.53511
2.55	2.62977	0.070818	0	48.3852	-0.017084	48.1249	2.90769	29.9998	0.438423	0.757134	22.5628	0.0045151	10.4451
2.6	2.69945	0.0708299	0	48.3598	-0.0179	48.1066	2.94451	29.9997	0.459326	0.79199	25.0922	0.00509002	11.4419
2.65	2.77123	0.0708434	0	48.3337	-0.0187388	48.0877	2.98244	29.9997	0.48086	0.827902	27.9051	0.00573815	12.5339
2.7	2.84516	0.0708586	0	48.3067	-0.0196004	48.0682	3.02151	29.9997	0.503039	0.864889	31.0334	0.00646881	13.73
2.75	2.92128	0.0708756	0	48.279	-0.020485	48.0482	3.06173	29.9996	0.525873	0.902974	34.5123	0.0072925	15.0404
2.8	2.99962	0.0708949	0	48.2504	-0.0213928	48.0275	3.10315	29.9996	0.549378	0.942177	38.3812	0.00822108	16.4757
2.85	3.08025	0.0709165	0	48.2211	-0.0223237	48.0063	3.14576	29.9995	0.573565	0.982522	42.6839	0.0092679	18.0481
2.9	3.16319	0.0709409	0	48.1908	-0.023278	47.9844	3.18961	29.9995	0.598449	1.02403	47.4689	0.010448	19.7705
2.95	3.24851	0.0709684	0	48.1597	-0.0242556	47.962	3.23473	29.9994	0.624045	1.06674	52.7903	0.0117784	21.6573
3	3.33626	0.0709994	0	48.1277	-0.0252564	47.9389	3.28112	29.9993	0.650368	1.11066	58.7083	0.0132782	23.7242
3.05	3.42647	0.0710342	0	48.0948	-0.0262803	47.9151	3.32884	29.9992	0.677433	1.15582	65.2896	0.014969	25.9883
3.1	3.51922	0.0710735	0	48.061	-0.0273272	47.8907	3.3779	29.9991	0.705258	1.20225	72.6088	0.016875	28.4685
3.15	3.61456	0.0711176	0	48.0262	-0.0283969	47.8656	3.42834	29.999	0.733859	1.24999	80.7485	0.0190238	31.1854
3.2	3.71254	0.0711673	0	47.9905	-0.029489	47.8398	3.48018	29.9989	0.763253	1.29906	89.8006	0.0214461	34.1615
3.25	3.81323	0.0712232	0	47.9537	-0.0306031	47.8133	3.53347	29.9988	0.793459	1.34949	99.8676	0.0241769	37.4217
3.3	3.91668	0.0712861	0	47.916	-0.0317386	47.7861	3.58824	29.9986	0.824494	1.40131	111.063	0.0272555	40.9931
3.35	4.02296	0.0713568	0	47.8771	-0.0328949	47.7581	3.64451	29.9984	0.856379	1.45456	123.514	0.030726	44.9052
3.4	4.13214	0.0714363	0	47.8373	-0.0340711	47.7293	3.70234	29.9982	0.889132	1.50927	137.36	0.0346384	49.1907
3.45	4.24427	0.0715257	0	47.7963	-0.0352663	47.6998	3.76175	29.998	0.922773	1.56548	152.758	0.0390491	53.8853
3.5	4.35944	0.0716261	0	47.7542	-0.0364792	47.6695	3.82278	29.9978	0.957323	1.62322	169.883	0.0440213	59.0278
3.55	4.47771	0.0717388	0	47.711	-0.0377086	47.6383	3.88549	29.9975	0.992804	1.68253	188.927	0.0496267	64.6611
3.6	4.59915	0.0718654	0	47.6665	-0.0389527	47.6063	3.94989	29.9972	1.02924	1.74345	210.107	0.0559458	70.832
3.65	4.72384	0.0720074	0	47.6209	-0.0402099	47.5735	4.01605	29.9968	1.06664	1.80601	233.66	0.0630696	77.5918
3.7	4.85186	0.0721667	0	47.574	-0.0414778	47.5398	4.084	29.9964	1.10505	1.87027	259.854	0.0711005	84.9968
3.75	4.98327	0.0723452	0	47.5259	-0.0427542	47.5051	4.15379	29.996	1.14447	1.93625	288.985	0.080154	93.1085
3.8	5.11817	0.0725451	0	47.4764	-0.0440364	47.4696	4.22547	29.9955	1.18494	2.00401	321.381	0.0903603	101.994
3.85	5.25662	0.0727688	0	47.4256	-0.0453211	47.433	4.29908	29.9949	1.22648	2.07358	357.409	0.101866	111.728
3.9	5.39872	0.0730189	0	47.3735	-0.046605	47.3956	4.37468	29.9943	1.26911	2.14502	397.475	0.114837	122.391
3.95	5.54455	0.0732984	0	47.3199	-0.0478843	47.3571	4.45231	29.9936	1.31286	2.21837	442.033	0.12946	134.071
4	5.69419	0.0736103	0	47.2649	-0.0491548	47.3176	4.53202	29.9928	1.35775	2.29367	491.587	0.145944	146.866
4.05	5.84774	0.0739581	0	47.2084	-0.0504118	47.277	4.61388	29.992	1.40381	2.37098	546.695	0.164528	160.882
4.1	6.00528	0.0743453	0	47.1504	-0.0516501	47.2354	4.69794	29.991	1.45108	2.45035	607.981	0.185478	176.236
4.15	6.16691	0.074776	0	47.0908	-0.0528644	47.1926	4.78425	29.9899	1.49956	2.53183	676.138	0.209095	193.055
4.2	6.33271	0.0752542	0	47.0296	-0.0540487	47.1487	4.87288	29.9887	1.5493	2.61548	751.935	0.23572	211.479
4.25	6.50278	0.0757845	0	46.9668	-0.0551966	47.1037	4.96388	29.9874	1.60033	2.70134	836.229	0.265735	231.662
4.3	6.67722	0.0763715	0	46.9023	-0.0563013	47.0574	5.05731	29.986	1.65266	2.78947	929.973	0.299572	253.771
4.35	6.85613	0.0770202	0	46.836	-0.0573558	47.01	5.15325	29.9844	1.70633	2.87993	1034.23	0.337718	277.989
4.4	7.03961	0.0777358	0	46.768	-0.0583525	46.9613	5.25174	29.9826	1.76137	2.97277	1150.17	0.380721	304.519
4.45	7.22776	0.0785235	0	46.6981	-0.0592838	46.9113	5.35286	29.9806	1.81782	3.06807	1279.1	0.4292	333.581
4.5	7.42067	0.0793887	0	46.6264	-0.0601417	46.86	5.45668	29.9785	1.87569	3.16587	1422.49	0.483851	365.416
4.55	7.61846	0.0803371	0	46.5527	-0.0609182	46.8073	5.56326	29.9761	1.93503	3.26623	1581.96	0.545462	400.289
4.6	7.82124	0.0813742	0	46.4771	-0.061605	46.7533	5.67267	29.9735	1.99586	3.36923	1759.3	0.614917	438.491
4.65	8.0291	0.0825056	0	46.3995	-0.0621941	46.6978	5.78498	29.9707	2.05822	3.47491	1956.53	0.693217	480.338
4.7	8.24216	0.0837368	0	46.3198	-0.0626773	46.6409	5.90027	29.9677	2.12214	3.58335	2175.86	0.781487	526.179
4.75	8.46053	0.0850735	0	46.238	-0.0630469	46.5825	6.01859	29.9643	2.18765	3.69461	2419.78	0.880996	576.395
4.8	8.68431	0.0865207	0	46.154	-0.0632951	46.5226	6.14002	29.9607	2.25479	3.80874	2691.05	0.993176	631.403
4.85	8.91363	0.0880838	0	46.0678	-0.0634147	46.4611	6.26464	29.9569	2.32358	3.92583	2992.72	1.11964	691.661
4.9	9.1486	0.0897676	0	45.9793	-0.0633988	46.3981	6.39252	29.9527	2.39407	4.04592	3328.21	1.26221	757.67
4.95	9.38933	0.0915769	0	45.8886	-0.0632408	46.3335	6.52371	29.9482	2.46629	4.16909	3701.31	1.42293	829.978
5	9.63594	0.093516	0	45.7954	-0.0629346	46.2672	6.65831	29.9434	2.54027	4.2954	4116.24	1.60412	909.186
5.05	9.88854	0.0955891	0	45.6999	-0.0624747	46.1992	6.79638	29.9382	2.61605	4.42491	4577.69	1.80837	995.954
5.1	10.1473	0.0978002	0	45.6018	-0.0618557	46.1295	6.93798	29.9327	2.69367	4.5577	5090.86	2.03864	1091
5.15	10.4122	0.100153	0	45.5013	-0.061073	46.0581	7.0832	29.9269	2.77315	4.69382	5661.56	2.29823	1195.12
5.2	10.6835	0.102651	0	45.3982	-0.0601221	45.9849	7.2321	29.9207	2.85455	4.83334	6296.24	2.59087	1309.18
5.25	10.9613	0.105297	0	45.2925	-0.0589989	45.9099	7.38476	29.9141	2.93788	4.97634	7002.07	2.92078	1434.12
5.3	11.2457	0.108095	0	45.1841	-0.0576997	45.8331	7.54124	29.9071	3.02319	5.12286	7787.03	3.29269	1570.99
5.35	11.5368	0.111048	0	45.073	-0.0562209	45.7544	7.70162	29.8998	3.11052	5.27298	8659.97	3.71196	1720.91
5.4	11.8347	0.114158	0	44.9591	-0.0545591	45.6738	7.86597	29.8921	3.1999	5.42677	9630.78	4.18462	1885.15
5.45	12.1396	0.117428	0	44.8424	-0.052711	45.5913	8.03435	29.8839	3.29137	5.58429	10710.4	4.71746	2065.06
5.5	12.4516	0.120861	0	44.7228	-0.0506733	45.5068	8.20685	29.8754	3.38496	5.7456	11911.1	5.31815	2262.13
5.55	12.7708	0.12446	0	44.6004	-0.0484428	45.4203	8.38353	29.8665	3.48072	5.91078	13246.4	5.99533	2478.02
5.6	13.0973	0.128228	0	44.475	-0.0460159	45.3318	8.56446	29.8571	3.57868	6.07988	14731.3	6.75873	2714.51
5.65	13.4313	0.132168	0	44.3465	-0.0433894	45.2413	8.74972	29.8473	3.67887	6.25298	16382.7	7.61934	2973.57
5.7	13.7728	0.136282	0	44.215	-0.0405593	45.1487	8.93938	29.8371	3.78134	6.43014	18219.3	8.58954	3257.35
5.75	14.1221	0.140575	0	44.0804	-0.0375219	45.0539	9.1335	29.8264	3.88612	6.61142	20261.7	9.68328	3568.22
5.8	14.4792	0.145048	0	43.9426	-0.034273	44.9571	9.33216	29.8153	3.99324	6.79689	22533.2	10.9163	3908.75
5.85	14.8442	0.149707	0	43.8016	-0.030808	44.8581	9.53543	29.8037	4.10275	6.98662	25059.2	12.3063	4281.78
5.9	15.2173	0.154554	0	43.6573	-0.0271224	44.7568	9.74339	29.7917	4.21468	7.18068	27868.4	13.8733	4690.41
5.95	15.5985	0.159594	0	43.5097	-0.0232109	44.6534	9.9561	29.7792	4.32905	7.37912	30992.5	15.6398	5138.04
6	15.9881	0.16483	0	43.3588	-0.0190681	44.5477	10.1736	29.7661	4.44592	7.58201	34466.9	17.6313	5628.39
6.05	16.3861	0.170266	0	43.2044	-0.0146883	44.4398	10.3961	29.7526	4.56531	7.78943	38330.8	19.8764	6165.53
6.1	16.7926	0.175908	0	43.0466	-0.0100653	44.3295	10.6235	29.7386	4.68726	8.00142	42627.7	22.4073	6753.94
6.15	17.2077	0.18176	0	42.8853	-0.00519243	44.217	10.8559	29.7241	4.8118	8.21805	47406.4	25.2605	7398.5
6.2	17.6316	0.187827	0	42.7204	-6.28458e-05	44.1021	11.0934	29.709	4.93896	8.43939	52720.9	28.477	8104.57
6.25	18.0643	0.194113	0	42.5519	0.00533082	43.9848	11.3361	29.6934	5.06877	8.66549	58631	32.1031	8878.03
6.3	18.5059	0.200625	0	42.3798	0.0109963	43.8651	11.5841	29.6772	5.20127	8.89642	65203.7	36.1909	9725.3
6.35	18.9567	0.207367	0	42.2039	0.0169417	43.743	11.8373	29.6604	5.33649	9.13223	72513.3	40.7992	10653.4
6.4	19.4165	0.214346	0	42.0243	0.0231756	43.6184	12.0959	29.6431	5.47446	9.37299	80642.2	45.9943	11670.1
6.45	19.8857	0.221567	0	41.8409	0.029707	43.4914	12.3599	29.6252	5.61519	9.61874	89682.5	51.8509	12783.9
6.5	20.3641	0.229037	0	41.6537	0.0365451	43.3619	12.6295	29.6066	5.75873	9.86955	99736.2	58.4533	14003.9
6.55	20.852	0.236763	0	41.4626	0.0436999	43.2299	12.9046	29.5874	5.90509	10.1255	100001	65.8964	15340.4
6.6	21.3494	0.244749	0	41.2676	0.0511813	43.0954	13.1852	29.5675	6.0543	10.3865	100001	74.287	16804.4
6.65	21.8563	0.253005	0	41.0686	0.0589999	42.9584	13.4716	29.547	6.20639	10.6528	100001	83.7463	18408.1
6.7	22.3729	0.261536	0	40.8657	0.0671667	42.8188	13.7637	29.5258	6.36137	10.9243	100001	94.4096	20164.9
6.75	22.8992	0.270349	0	40.6587	0.0756931	42.6767	14.0615	29.5039	6.51926	11.2011	100001	106.431	22089.3
6.8	23.4353	0.279453	0	40.4476	0.0845907	42.532	14.3652	29.4813	6.68008	11.4833	100001	119.982	24197.4
6.85	23.9812	0.288854	0	40.2324	0.0938718	42.3847	14.6747	29.4579	6.84386	11.7708	100001	135.26	26506.6
6.9	24.537	0.298561	0	40.0131	0.103549	42.2349	14.9901	29.4338	7.01059	12.0638	100001	152.483	29036.3
6.95	25.1027	0.308582	0	39.7896	0.113635	42.0825	15.3115	29.4089	7.1803	12.3621	100001	171.899	31807.3
7	25.6783	0.318924	0	39.562	0.124143	41.9274	15.6388	29.3832	7.353	12.666	100001	193.787	34842.8
7.05	26.264	0.329596	0	39.3301	0.135087	41.7698	15.9722	29.3567	7.52868	12.9753	100001	218.462	38168
7.1	26.8596	0.340606	0	39.094	0.146481	41.6096	16.3116	29.3293	7.70737	13.2902	100001	246.28	41810.6
7.15	27.4652	0.351964	0	38.8537	0.15834	41.4468	16.657	29.3011	7.88905	13.6106	100001	277.639	45800.7
7.2	28.0808	0.363677	0	38.609	0.170678	41.2814	17.0086	29.272	8.07374	13.9366	100001	312.991	50171.7
7.25	28.7065	0.375755	0	38.3601	0.18351	41.1135	17.3663	29.242	8.26143	14.2681	100001	352.845	54959.8
7.3	29.3421	0.388207	0	38.1069	0.196852	40.9429	17.73	29.2111	8.45212	14.6052	100001	397.773	60204.9
7.35	29.9877	0.401043	0	37.8494	0.21072	40.7699	18.1	29.1792	8.64579	14.9479	100001	448.422	65950.5
7.4	30.6432	0.41427	0	37.5876	0.225129	40.5943	18.476	29.1463	8.84244	15.2962	100001	505.521	72244.4
7.45	31.3085	0.4279	0	37.3215	0.240097	40.4161	18.8582	29.1124	9.04205	15.65	100001	569.89	79139
7.5	31.9838	0.441942	0	37.051	0.25564	40.2355	19.2464	29.0775	9.24462	16.0094	100001	642.455	86691.6
7.55	32.6687	0.456404	0	36.7763	0.271776	40.0524	19.6408	29.0416	9.45011	16.3743	100001	724.259	94964.9
7.6	33.3634	0.471298	0	36.4973	0.288521	39.8669	20.0413	29.0046	9.65851	16.7447	100001	816.479	100002
7.65	34.0676	0.486633	0	36.214	0.305894	39.6789	20.4479	28.9665	9.86978	17.1206	100001	920.442	100002
7.7	34.7814	0.502418	0	35.9265	0.323912	39.4886	20.8605	28.9272	10.0839	17.5019	100001	1037.65	100002
7.75	35.5045	0.518665	0	35.6347	0.342593	39.2959	21.279	28.8869	10.3009	17.8887	100001	1169.77	100002
7.8	36.237	0.535382	0	35.3387	0.361956	39.1009	21.7036	28.8453	10.5206	18.2808	100001	1318.72	100002
7.85	36.9785	0.55258	0	35.0385	0.382019	38.9037	22.134	28.8026	10.743	18.6782	100001	1486.63	100002
7.9	37.729	0.570269	0	34.7342	0.402801	38.7042	22.5704	28.7586	10.9682	19.0809	100001	1675.92	100002
7.95	38.4884	0.588459	0	34.4258	0.42432	38.5025	23.0125	28.7134	11.196	19.4888	100001	1889.32	100002
8	39.2564	0.60716	0	34.1133	0.446597	38.2987	23.4603	28.667	11.4264	19.9018	100001	2129.89	100002
8.05	40.0329	0.626382	0	33.7968	0.469648	38.0929	23.9138	28.6192	11.6594	20.3198	100001	2401.09	100002
8.1	40.8177	0.646135	0	33.4764	0.493495	37.885	24.3728	28.5701	11.8948	20.7428	100001	2706.82	100002
8.15	41.6105	0.666428	0	33.152	0.518155	37.6752	24.8374	28.5197	12.1326	21.1707	100001	3051.49	100002
8.2	42.4112	0.687272	0	32.8239	0.543648	37.4634	25.3073	28.4679	12.3728	21.6033	100001	3440.04	100002
8.25	43.2195	0.708676	0	32.4919	0.569992	37.2499	25.7825	28.4147	12.6153	22.0407	100001	3878.06	100002
8.3	44.0351	0.730649	0	32.1563	0.597207	37.0346	26.2629	28.3601	12.86	22.4825	100001	4371.86	100002
8.35	44.8578	0.753201	0	31.817	0.625312	36.8176	26.7483	28.304	13.1068	22.9289	100001	4928.54	100002
8.4	45.6874	0.77634	0	31.4742	0.654324	36.599	27.2387	28.2465	13.3557	23.3795	100001	5556.09	100002
8.45	46.5235	0.800076	0	31.128	0.684262	36.3789	27.7339	28.1876	13.6065	23.8344	100001	6263.56	100002
8.5	47.3659	0.824417	0	30.7784	0.715144	36.1574	28.2337	28.1271	13.8593	24.2933	100001	7061.11	100002
8.55	48.2141	0.849372	0	30.4255	0.746988	35.9344	28.7381	28.0651	14.1137	24.7561	100001	7960.21	100002
8.6	49.068	0.874947	0	30.0695	0.77981	35.7102	29.2468	28.0015	14.3699	25.2227	100001	8973.79	100002
8.65	49.9272	0.901152	0	29.7105	0.813629	35.4848	29.7598	27.9364	14.6277	25.6929	100001	10116.4	100002
8.7	50.7913	0.927993	0	29.3485	0.84846	35.2583	30.2768	27.8697	14.8869	26.1665	100001	11404.6	100002
8.75	51.66	0.955476	0	28.9837	0.884318	35.0308	30.7976	27.8014	15.1475	26.6435	100001	12856.7	100002
8.8	52.5329	0.983609	0	28.6162	0.921219	34.8024	31.3222	27.7315	15.4093	27.1235	100001	14493.8	100002
8.85	53.4096	1.0124	0	28.2461	0.959178	34.5731	31.8502	27.6599	15.6724	27.6065	100001	16339.3	100002
8.9	54.2897	1.04185	0	27.8736	0.998208	34.3431	32.3816	27.5868	15.9364	28.0922	100001	18419.8	100002
8.95	55.1729	1.07196	0	27.4988	1.03832	34.1126	32.9161	27.5119	16.2014	28.5805	100001	20765.3	100002
9	56.0588	1.10274	0	27.1218	1.07953	33.8815	33.4535	27.4354	16.4671	29.0711	100001	23409.3	100002
9.05	56.9469	1.1342	0	26.7428	1.12185	33.65	33.9935	27.3573	16.7335	29.5639	100001	26390.1	100002
9.1	57.8368	1.16633	0	26.3619	1.16528	33.4182	34.5361	27.2774	17.0005	30.0587	100001	29750.4	100002
9.15	58.728	1.19914	0	25.9793	1.20984	33.1861	35.081	27.1959	17.2679	30.5552	100001	33538.5	100002
9.2	59.6203	1.23264	0	25.5951	1.25553	32.954	35.6279	27.1126	17.5356	31.0532	100001	37809	100002
9.25	60.513	1.26681	0	25.2095	1.30236	32.7219	36.1766	27.0277	17.8034	31.5525	100001	42623.3	100002
9.3	61.4059	1.30166	0	24.8226	1.35034	32.49	36.7269	26.9411	18.0712	32.053	100001	48050.6	100002
9.35	62.2983	1.33719	0	24.4346	1.39947	32.2582	37.2785	26.8528	18.339	32.5543	100001	54168.9	100002
9.4	63.19	1.3734	0	24.0457	1.44974	32.0268	37.8312	26.7628	18.6065	33.0562	100001	61066.3	100002
9.45	64.0803	1.41029	0	23.6561	1.50117	31.7958	38.3848	26.6712	18.8736	33.5586	100001	68842	100002
9.5	64.969	1.44784	0	23.2658	1.55375	31.5654	38.939	26.5779	19.1402	34.0611	100001	77607.7	100002
9.55	65.8554	1.48606	0	22.8752	1.60748	31.3357	39.4935	26.4829	19.4061	34.5636	100001	87489.6	100002
9.6	66.7392	1.52495	0	22.4842	1.66236	31.1067	40.0482	26.3863	19.6713	35.0658	100001	98629.7	100002
9.65	67.62	1.56449	0	22.0933	1.71837	30.8786	40.6027	26.288	19.9355	35.5674	100001	100003	100002
9.7	68.4971	1.60467	0	21.7024	1.77551	30.6515	41.1568	26.1881	20.1986	36.0683	100001	100003	100002
9.75	69.3703	1.64549	0	21.3119	1.83378	30.4255	41.7102	26.0867	20.4606	36.5681	100001	100003	100002
9.8	70.239	1.68694	0	20.9218	1.89315	30.2007	42.2626	25.9837	20.7212	37.0667	100001	100003	100002
9.85	71.1029	1.729	0	20.5323	1.95362	29.9771	42.814	25.8792	20.9804	37.5639	100001	100003	100002
9.9	71.9615	1.77167	0	20.1437	2.01517	29.755	43.3638	25.7732	21.2379	38.0593	100001	100003	100002
9.95	72.8143	1.81493	0	19.756	2.07778	29.5343	43.9121	25.6657	21.4938	38.5528	100001	100003	100002
10	73.661	1.85876	0	19.3696	2.14144	29.3152	44.4583	25.5567	21.7478	39.0441	100001	100003	100002
10.05	74.5011	1.90316	0	18.9845	2.20612	29.0978	45.0024	25.4464	21.9998	39.5329	100001	100003	100002
10.1	75.3343	1.94809	0	18.6009	2.27179	28.8822	45.5439	25.3347	22.2498	40.0192	100001	100003	100002
10.15	76.1601	1.99355	0	18.2191	2.33843	28.6684	46.0828	25.2218	22.4975	40.5025	100001	100003	100002
10.2	76.9781	2.03951	0	17.8392	2.40602	28.4566	46.6187	25.1076	22.7429	40.9828	100001	100003	100002
10.25	77.7879	2.08596	0	17.4613	2.47452	28.2468	47.1515	24.9921	22.9859	41.4597	100001	100003	100002
10.3	78.5893	2.13287	0	17.0857	2.5439	28.0391	47.6807	24.8756	23.2263	41.9331	100001	100003	100002
10.35	79.3818	2.18022	0	16.7124	2.61412	27.8336	48.2063	24.7579	23.464	42.4027	100001	100003	100002
10.4	80.1651	2.22798	0	16.3418	2.68516	27.6304	48.728	24.6392	23.699	42.8684	100001	100003	100002
10.45	80.9389	2.27614	0	15.9739	2.75696	27.4296	49.2455	24.5196	23.9312	43.3299	100001	100003	100002
10.5	81.7028	2.32465	0	15.6088	2.8295	27.2311	49.7587	24.399	24.1603	43.7871	100001	100003	100002
10.55	82.4566	2.37351	0	15.2469	2.90272	27.0352	50.2673	24.2776	24.3865	44.2397	100001	100003	100002
10.6	83.2	2.42266	0	14.8881	2.97658	26.8418	50.771	24.1554	24.6095	44.6876	100001	100003	100002
10.65	83.9328	2.4721	0	14.5327	3.05104	26.651	51.2698	24.0326	24.8293	45.1306	100001	100003	100002
10.7	84.6545	2.52178	0	14.1808	3.12604	26.4628	51.7633	23.9091	25.0459	45.5685	100001	100003	100002
10.75	85.3652	2.57168	0	13.8326	3.20154	26.2774	52.2514	23.7851	25.259	46.0012	100001	100003	100002
10.8	86.0644	2.62176	0	13.4881	3.27749	26.0947	52.734	23.6607	25.4688	46.4284	100001	100003	100002
10.85	86.752	2.67199	0	13.1475	3.35383	25.9148	53.2107	23.5358	25.6751	46.8501	100001	100003	100002
10.9	87.4279	2.72235	0	12.811	3.43051	25.7378	53.6815	23.4107	25.8779	47.2661	100001	100003	100002
10.95	88.0918	2.77278	0	12.4787	3.50747	25.5637	54.1462	23.2854	26.077	47.6762	100001	100003	100002
11	88.7437	2.82326	0	12.1506	3.58466	25.3926	54.6046	23.1599	26.2726	48.0804	100001	100003	100002
11.05	89.3833	2.87376	0	11.8269	3.66202	25.2243	55.0566	23.0345	26.4645	48.4784	100001	100003	100002
11.1	90.0105	2.92423	0	11.5078	3.7395	25.0591	55.502	22.909	26.6526	48.8703	100001	100003	100002
11.15	90.6253	2.97465	0	11.1932	3.81702	24.8969	55.9407	22.7837	26.8371	49.2558	100001	100003	100002
11.2	91.2276	3.02497	0	10.8833	3.89454	24.7377	56.3726	22.6587	27.0178	49.635	100001	100003	100002
11.25	91.8172	3.07517	0	10.5783	3.972	24.5816	56.7975	22.534	27.1947	50.0076	100001	100003	100002
11.3	92.3942	3.1252	0	10.2781	4.04932	24.4286	57.2154	22.4096	27.3678	50.3737	100001	100003	100002
11.35	92.9585	3.17503	0	9.98283	4.12647	24.2787	57.6261	22.2858	27.5371	50.733	100001	100003	100002
11.4	93.5101	3.22463	0	9.69261	4.20337	24.1318	58.0296	22.1626	27.7025	51.0857	100001	100003	100002
11.45	94.049	3.27395	0	9.40747	4.27996	23.9881	58.4258	22.04	27.8642	51.4316	100001	100003	100002
11.5	94.5753	3.32297	0	9.12748	4.35619	23.8474	58.8145	21.9182	28.0221	51.7707	100001	100003	100002
11.55	95.0888	3.37165	0	8.85269	4.43201	23.7098	59.1958	21.7972	28.1761	52.1029	100001	100003	100002
11.6	95.5897	3.41996	0	8.58314	4.50734	23.5754	59.5696	21.6772	28.3264	52.4283	100001	100003	100002
11.65	96.0781	3.46786	0	8.31887	4.58215	23.444	59.9359	21.5581	28.4729	52.7467	100001	100003	100002
11.7	96.5539	3.51532	0	8.05992	4.65636	23.3157	60.2945	21.4402	28.6157	53.0582	100001	100003	100002
11.75	97.0173	3.56231	0	7.80632	4.72994	23.1905	60.6456	21.3234	28.7547	53.3627	100001	100003	100002
11.8	97.4684	3.60881	0	7.55807	4.80282	23.0683	60.989	21.2079	28.89	53.6603	100001	100003	100002
11.85	97.9073	3.65477	0	7.31521	4.87497	22.9492	61.3247	21.0936	29.0217	53.951	100001	100003	100002
11.9	98.3341	3.70018	0	7.07773	4.94632	22.833	61.6529	20.9808	29.1497	54.2348	100001	100003	100002
11.95	98.749	3.74501	0	6.84564	5.01683	22.7199	61.9733	20.8694	29.2742	54.5117	100001	100003	100002
12	99.152	3.78923	0	6.61893	5.08646	22.6097	62.2862	20.7595	29.3951	54.7818	100001	100003	100002
12.05	99.5433	3.83282	0	6.3976	5.15516	22.5025	62.5915	20.6512	29.5125	55.045	100001	100003	100002
12.1	99.9231	3.87575	0	6.18163	5.2229	22.3981	62.8892	20.5445	29.6264	55.3015	100001	100003	100002
12.15	100.292	3.91801	0	5.971	5.28964	22.2966	63.1793	20.4395	29.737	55.5512	100001	100003	100002
12.2	100.649	3.95957	0	5.76568	5.35534	22.198	63.462	20.3362	29.8442	55.7943	100001	100003	100002
12.25	100.995	4.00041	0	5.56564	5.41997	22.1021	63.7373	20.2347	29.9481	56.0307	100001	100003	100002
12.3	101.331	4.04053	0	5.37084	5.48349	22.0091	64.0052	20.135	30.0487	56.2606	100001	100003	100002
12.35	101.656	4.07989	0	5.18125	5.54589	21.9187	64.2658	20.0372	30.1462	56.4841	100001	100003	100002
12.4	101.97	4.1185	0	4.99681	5.60713	21.831	64.5193	19.9413	30.2405	56.7012	100001	100003	100002
12.45	102.274	4.15633	0	4.81747	5.66719	21.746	64.7655	19.8473	30.3318	56.9119	100001	100003	100002
12.5	102.569	4.19338	0	4.64318	5.72605	21.6635	65.0047	19.7552	30.4201	57.1165	100001	100003	100002
12.55	102.853	4.22964	0	4.47388	5.78369	21.5836	65.237	19.6651	30.5054	57.3149	100001	100003	100002
12.6	103.128	4.2651	0	4.3095	5.8401	21.5062	65.4624	19.577	30.5879	57.5073	100001	100003	100002
12.65	103.393	4.29975	0	4.14997	5.89527	21.4313	65.681	19.4909	30.6675	57.6938	100001	100003	100002
12.7	103.65	4.33359	0	3.99524	5.94918	21.3587	65.893	19.4068	30.7444	57.8745	100001	100003	100002
12.75	103.897	4.36662	0	3.84521	6.00184	21.2886	66.0984	19.3247	30.8187	58.0494	100001	100003	100002
12.8	104.136	4.39883	0	3.69982	6.05322	21.2207	66.2974	19.2446	30.8903	58.2187	100001	100003	100002
12.85	104.366	4.43023	0	3.55898	6.10333	21.1551	66.49	19.1666	30.9594	58.3826	100001	100003	100002
12.9	104.589	4.46082	0	3.42261	6.15217	21.0917	66.6765	19.0906	31.026	58.541	100001	100003	100002
12.95	104.803	4.49059	0	3.29064	6.19975	21.0304	66.8569	19.0166	31.0903	58.6942	100001	100003	100002
13	105.009	4.51956	0	3.16296	6.24605	20.9713	67.0313	18.9446	31.1521	58.8422	100001	100003	100002
13.05	105.207	4.54773	0	3.0395	6.2911	20.9142	67.1999	18.8746	31.2117	58.9852	100001	100003	100002
13.1	105.399	4.5751	0	2.92017	6.33489	20.8591	67.3628	18.8066	31.2691	59.1232	100001	100003	100002
13.15	105.583	4.60167	0	2.80487	6.37744	20.8059	67.5202	18.7406	31.3243	59.2564	100001	100003	100002
13.2	105.76	4.62747	0	2.69351	6.41876	20.7547	67.6721	18.6765	31.3775	59.385	100001	100003	100002
13.25	105.93	4.6525	0	2.586	6.45885	20.7053	67.8187	18.6143	31.4286	59.509	100001	100003	100002
13.3	106.094	4.67676	0	2.48224	6.49775	20.6577	67.9601	18.554	31.4777	59.6286	100001	100003	100002
13.35	106.252	4.70027	0	2.38215	6.53545	20.6119	68.0965	18.4956	31.525	59.7438	100001	100003	100002
13.4	106.403	4.72304	0	2.28563	6.57197	20.5677	68.228	18.439	31.5705	59.8548	100001	100003	100002
13.45	106.549	4.74508	0	2.19258	6.60735	20.5252	68.3548	18.3842	31.6141	59.9617	100001	100003	100002
13.5	106.689	4.76641	0	2.10291	6.64158	20.4843	68.4768	18.3312	31.6561	60.0647	100001	100003	100002
13.55	106.823	4.78703	0	2.01653	6.6747	20.4449	68.5944	18.28	31.6963	60.1638	100001	100003	100002
13.6	106.952	4.80696	0	1.93335	6.70672	20.4071	68.7076	18.2304	31.735	60.2592	100001	100003	100002
13.65	107.076	4.82622	0	1.85327	6.73767	20.3707	68.8165	18.1826	31.7721	60.3509	100001	100003	100002
13.7	107.194	4.84482	0	1.7762	6.76757	20.3357	68.9213	18.1364	31.8078	60.4391	100001	100003	100002
13.75	107.308	4.86278	0	1.70205	6.79643	20.302	69.0221	18.0917	31.842	60.5239	100001	100003	100002
13.8	107.418	4.8801	0	1.63073	6.8243	20.2697	69.1191	18.0487	31.8748	60.6054	100001	100003	100002
13.85	107.522	4.89681	0	1.56216	6.85118	20.2387	69.2123	18.0072	31.9062	60.6838	100001	100003	100002
13.9	107.623	4.91292	0	1.49624	6.8771	20.2089	69.3018	17.9671	31.9364	60.759	100001	100003	100002
13.95	107.719	4.92844	0	1.4329	6.90208	20.1803	69.3879	17.9286	31.9653	60.8313	100001	100003	100002
14	107.812	4.9434	0	1.37204	6.92616	20.1528	69.4705	17.8914	31.9931	60.9007	100001	100003	100002
14.05	107.9	4.9578	0	1.31359	6.94935	20.1264	69.5499	17.8556	32.0196	60.9673	100001	100003	100002
14.1	107.985	4.97167	0	1.25746	6.97168	20.1011	69.626	17.8212	32.0451	61.0312	100001	100003	100002
14.15	108.067	4.98501	0	1.20358	6.99318	20.0769	69.6992	17.788	32.0695	61.0926	100001	100003	100002
14.2	108.145	4.99785	0	1.15186	7.01386	20.0536	69.7694	17.7561	32.0928	61.1514	100001	100003	100002
14.25	108.219	5.0102	0	1.10223	7.03376	20.0313	69.8367	17.7254	32.1152	61.2078	100001	100003	100002
14.3	108.291	5.02206	0	1.05462	7.05289	20.0099	69.9013	17.6959	32.1367	61.262	100001	100003	100002
14.35	108.359	5.03347	0	1.00896	7.07128	19.9894	69.9632	17.6676	32.1572	61.3138	100001	100003	100002
14.4	108.424	5.04443	0	0.965168	7.08895	19.9698	70.0226	17.6403	32.1768	61.3636	100001	100003	100002
14.45	108.487	5.05496	0	0.923183	7.10593	19.9509	70.0795	17.6142	32.1956	61.4112	100001	100003	100002
14.5	108.547	5.06507	0	0.882937	7.12224	19.9329	70.134	17.589	32.2136	61.4569	100001	100003	100002
14.55	108.604	5.07478	0	0.844366	7.1379	19.9156	70.1863	17.5649	32.2308	61.5006	100001	100003	100002
14.6	108.659	5.0841	0	0.807405	7.15293	19.8991	70.2364	17.5418	32.2473	61.5425	100001	100003	100002
14.65	108.712	5.09304	0	0.771994	7.16736	19.8832	70.2844	17.5195	32.2631	61.5827	100001	100003	100002
14.7	108.762	5.10162	0	0.738074	7.1812	19.8681	70.3303	17.4982	32.2782	61.6211	100001	100003	100002
14.75	108.81	5.10985	0	0.705587	7.19448	19.8536	70.3743	17.4778	32.2926	61.6579	100001	100003	100002
14.8	108.856	5.11774	0	0.674476	7.20721	19.8397	70.4165	17.4582	32.3064	61.6931	100001	100003	100002
14.85	108.9	5.12531	0	0.644689	7.21943	19.8264	70.4568	17.4394	32.3196	61.7268	100001	100003	100002
14.9	108.942	5.13256	0	0.616173	7.23113	19.8136	70.4954	17.4213	32.3322	61.7591	100001	100003	100002
14.95	108.983	5.13951	0	0.588878	7.24235	19.8015	70.5324	17.4041	32.3443	61.79	100001	100003	100002
15	109.021	5.14617	0	0.562754	7.25311	19.7898	70.5678	17.3875	32.3558	61.8195	100001	100003	100002
15.05	109.058	5.15255	0	0.537754	7.26341	19.7787	70.6016	17.3717	32.3668	61.8478	100001	100003	100002
15.1	109.093	5.15866	0	0.513834	7.27328	19.768	70.634	17.3565	32.3774	61.8748	100001	100003	100002
15.15	109.126	5.16451	0	0.490948	7.28274	19.7578	70.665	17.3419	32.3874	61.9007	100001	100003	100002
15.2	109.159	5.17012	0	0.469056	7.29179	19.7481	70.6946	17.328	32.3971	61.9254	100001	100003	100002
15.25	109.189	5.17548	0	0.448115	7.30046	19.7387	70.7229	17.3147	32.4063	61.9491	100001	100003	100002
15.3	109.219	5.18062	0	0.428087	7.30876	19.7298	70.75	17.3019	32.4151	61.9717	100001	100003	100002
15.35	109.247	5.18554	0	0.408934	7.3167	19.7213	70.776	17.2897	32.4235	61.9933	100001	100003	100002
15.4	109.273	5.19024	0	0.390619	7.3243	19.7132	70.8007	17.278	32.4315	62.014	100001	100003	100002
15.45	109.299	5.19474	0	0.373108	7.33158	19.7054	70.8244	17.2668	32.4392	62.0338	100001	100003	100002
15.5	109.323	5.19905	0	0.356366	7.33854	19.6979	70.8471	17.2561	32.4465	62.0527	100001	100003	100002
15.55	109.347	5.20317	0	0.340361	7.3452	19.6908	70.8687	17.2459	32.4535	62.0707	100001	100003	100002
15.6	109.369	5.20712	0	0.325061	7.35157	19.684	70.8894	17.2361	32.4602	62.088	100001	100003	100002
15.65	109.39	5.21089	0	0.310438	7.35767	19.6775	70.9092	17.2267	32.4666	62.1045	100001	100003	100002
15.7	109.411	5.2145	0	0.296461	7.3635	19.6713	70.9281	17.2177	32.4727	62.1202	100001	100003	100002
15.75	109.43	5.21794	0	0.283104	7.36907	19.6654	70.9462	17.2092	32.4785	62.1353	100001	100003	100002
15.8	109.449	5.22124	0	0.270339	7.3744	19.6597	70.9634	17.201	32.4841	62.1497	100001	100003	100002
15.85	109.466	5.22439	0	0.258142	7.3795	19.6543	70.9799	17.1931	32.4894	62.1635	100001	100003	100002
15.9	109.483	5.22741	0	0.246487	7.38437	19.6491	70.9957	17.1856	32.4945	62.1766	100001	100003	100002
15.95	109.499	5.23029	0	0.235351	7.38903	19.6442	71.0107	17.1785	32.4993	62.1891	100001	100003	100002
16	109.515	5.23304	0	0.224713	7.39348	19.6395	71.0251	17.1716	32.5039	62.2011	100001	100003	100002
16.05	109.53	5.23568	0	0.214549	7.39774	19.6349	71.0389	17.1651	32.5084	62.2126	100001	100003	100002
16.1	109.544	5.23819	0	0.20484	7.40181	19.6306	71.052	17.1588	32.5126	62.2235	100001	100003	100002
16.15	109.557	5.2406	0	0.195565	7.40569	19.6265	71.0645	17.1529	32.5166	62.234	100001	100003	100002
16.2	109.57	5.24289	0	0.186706	7.40941	19.6226	71.0765	17.1472	32.5205	62.2439	100001	100003	100002
16.25	109.582	5.24509	0	0.178244	7.41296	19.6188	71.088	17.1417	32.5242	62.2535	100001	100003	100002
16.3	109.594	5.24719	0	0.170162	7.41635	19.6153	71.0989	17.1365	32.5277	62.2626	100001	100003	100002
16.35	109.605	5.24919	0	0.162444	7.41959	19.6118	71.1093	17.1315	32.531	62.2713	100001	100003	100002
16.4	109.616	5.25111	0	0.155072	7.42269	19.6086	71.1193	17.1268	32.5342	62.2796	100001	100003	100002
16.45	109.626	5.25293	0	0.148032	7.42565	19.6055	71.1288	17.1222	32.5373	62.2875	100001	100003	100002
16.5	109.636	5.25468	0	0.141309	7.42847	19.6025	71.1379	17.1179	32.5402	62.2951	100001	100003	100002
16.55	109.645	5.25635	0	0.134889	7.43117	19.5996	71.1466	17.1137	32.543	62.3023	100001	100003	100002
16.6	109.654	5.25794	0	0.128758	7.43375	19.5969	71.1549	17.1098	32.5456	62.3092	100001	100003	100002
16.65	109.662	5.25947	0	0.122904	7.43621	19.5943	71.1628	17.106	32.5482	62.3158	100001	100003	100002
16.7	109.67	5.26092	0	0.117315	7.43856	19.5918	71.1703	17.1024	32.5506	62.3221	100001	100003	100002
16.75	109.678	5.26231	0	0.111978	7.44081	19.5895	71.1775	17.0989	32.5529	62.3281	100001	100003	100002
16.8	109.685	5.26364	0	0.106883	7.44295	19.5872	71.1844	17.0956	32.5551	62.3338	100001	100003	100002
16.85	109.692	5.2649	0	0.102018	7.445	19.5851	71.191	17.0925	32.5572	62.3393	100001	100003	100002
16.9	109.699	5.26611	0	0.097373	7.44696	19.583	71.1973	17.0895	32.5592	62.3445	100001	100003	100002
16.95	109.706	5.26727	0	0.0929386	7.44883	19.581	71.2033	17.0866	32.5612	62.3495	100001	100003	100002
17	109.712	5.26837	0	0.0887052	7.45061	19.5792	71.209	17.0839	32.563	62.3543	100001	100003	100002
17.05	109.717	5.26942	0	0.0846636	7.45231	19.5774	71.2144	17.0812	32.5647	62.3588	100001	100003	100002
17.1	109.723	5.27043	0	0.0808054	7.45394	19.5757	71.2197	17.0787	32.5664	62.3632	100001	100003	100002
17.15	109.728	5.27139	0	0.0771222	7.45549	19.574	71.2246	17.0764	32.568	62.3673	100001	100003	100002
17.2	109.733	5.2723	0	0.0736062	7.45697	19.5725	71.2294	17.0741	32.5695	62.3713	100001	100003	100002
17.25	109.738	5.27318	0	0.0702498	7.45839	19.571	71.2339	17.0719	32.571	62.375	100001	100003	100002
17.3	109.743	5.27401	0	0.067046	7.45974	19.5696	71.2383	17.0698	32.5724	62.3787	100001	100003	100002
17.35	109.747	5.27481	0	0.0639877	7.46103	19.5682	71.2424	17.0678	32.5737	62.3821	100001	100003	100002
17.4	109.752	5.27557	0	0.0610684	7.46226	19.5669	71.2463	17.0659	32.5749	62.3854	100001	100003	100002
17.45	109.756	5.2763	0	0.0582819	7.46344	19.5657	71.2501	17.0641	32.5762	62.3885	100001	100003	100002
17.5	109.759	5.27699	0	0.0556221	7.46456	19.5645	71.2537	17.0624	32.5773	62.3915	100001	100003	100002
17.55	109.763	5.27766	0	0.0530833	7.46563	19.5634	71.2571	17.0608	32.5784	62.3944	100001	100003	100002
17.6	109.767	5.27829	0	0.0506601	7.46666	19.5623	71.2604	17.0592	32.5794	62.3971	100001	100003	100002
17.65	109.77	5.27889	0	0.0483472	7.46763	19.5613	71.2635	17.0577	32.5804	62.3997	100001	100003	100002
17.7	109.773	5.27947	0	0.0461396	7.46857	19.5603	71.2665	17.0563	32.5814	62.4022	100001	100003	100002
17.75	109.776	5.28002	0	0.0440326	7.46946	19.5594	71.2694	17.0549	32.5823	62.4045	100001	100003	100002
17.8	109.779	5.28054	0	0.0420216	7.4703	19.5585	71.2721	17.0536	32.5832	62.4068	100001	100003	100002
[truncated: 605 more rows]

## Sheet: FP_BH1
Time	RI	FP	BH	fructose	formate	acetate	butyrate	unknown compound	H20	CO2	lag_RI	lag_FP	lag_BH
[truncated: 961 more rows]

[truncated: 4 more sheets: RI_BH7, FP_BH3, RI_FP_BH10, RI_FP_BH12]
