# Supplementary material for: Integrated culturing, modeling and transcriptomics uncovers complex interactions and emergent behavior in a three-species synthetic gut community
Source: eLife. 2018 Oct 16;7:e37090. doi: 10.7554/eLife.37090 (PMC6237439; doi:10.7554/eLife.37090)
Supplement: Figure 6—source data 1. [file elife-37090-fig6-data1.xlsx]

## Sheet: Lag phase
Q(0) RI	Q(0) FP	Final abund. RI (mM)	Final abund. FP (mM)	Final abund. BH (mM)	Ratio (RI-FP)/(RI+FP)
1e-10	1e-10	1.05574	0.400672	128.296	0.449782		Simulation result for the last time point obtained with the kinetic model using parameterization 2 and different lag phases.
1e-10	1.67683e-10	1.05414	0.456369	128.086	0.395742		The Q variable determines the length of the lag phase.
1e-10	2.81177e-10	1.0523	0.519648	127.849	0.33885
1e-10	4.71487e-10	1.05026	0.591391	127.579	0.279518		RI: Roseburia intestinalis L1-82
1e-10	7.90604e-10	1.04791	0.672435	127.273	0.218254		FP: Faecalibacterium prausnitzii A2-165
1e-10	1.32571e-09	1.0453	0.763777	126.929	0.155616		BH: Blautia hydrogenotrophica S5a33
1e-10	2.223e-09	1.04238	0.866376	126.542	0.0922111
1e-10	3.72759e-09	1.03913	0.981225	126.108	0.0286628
1e-10	6.25055e-09	1.03552	1.10934	125.623	-0.0344135
1e-10	1.04811e-08	1.03153	1.2517	125.084	-0.0964329
1e-10	1.75751e-08	1.02716	1.4093	124.486	-0.156842
1e-10	2.94705e-08	1.02229	1.58302	123.826	-0.215226
1e-10	4.94171e-08	1.01699	1.7737	123.101	-0.271156
1e-10	8.28643e-08	1.01127	1.98201	122.307	-0.324309
1e-10	1.3895e-07	1.00501	2.20862	121.442	-0.374535
1e-10	2.32995e-07	0.99832	2.45397	120.503	-0.421647
1e-10	3.90694e-07	0.991158	2.71811	119.49	-0.465578
1e-10	6.55129e-07	0.983541	3.00108	118.402	-0.506332
1e-10	1.09854e-06	0.975498	3.30285	117.238	-0.543984
1e-10	1.84207e-06	0.967037	3.62256	116.002	-0.578597
1e-10	3.08884e-06	0.958212	3.95963	114.694	-0.610312
1e-10	5.17947e-06	0.949093	4.31306	113.317	-0.639276
1e-10	8.68511e-06	0.939685	4.68144	111.877	-0.665659
1e-10	1.45635e-05	0.930126	5.06316	110.378	-0.689611
1e-10	2.44205e-05	0.920427	5.45635	108.826	-0.711319
1e-10	4.09492e-05	0.910721	5.85885	107.23	-0.730937
1e-10	6.86649e-05	0.901082	6.26828	105.598	-0.74863
1e-10	0.00011514	0.891628	6.68202	103.939	-0.764545
1e-10	0.00019307	0.88243	7.09725	102.262	-0.778831
1e-10	0.000323746	0.873658	7.511	100.58	-0.791605
1e-10	0.000542868	0.86532	7.92013	98.9047	-0.803011
1e-10	0.000910298	0.857624	8.32141	97.2474	-0.813134
1e-10	0.00152642	0.85065	8.71155	95.6212	-0.822081
1e-10	0.00255955	0.844556	9.08726	94.0393	-0.829929
1e-10	0.00429193	0.839324	9.44529	92.5148	-0.836781
1e-10	0.00719686	0.83515	9.78251	91.0607	-0.842687
1e-10	0.0120679	0.832117	10.096	89.6892	-0.847711
1e-10	0.0202359	0.830269	10.3832	88.4121	-0.851916
1e-10	0.0339322	0.829639	10.6419	87.2397	-0.855357
1e-10	0.0568987	0.830233	10.8705	86.181	-0.858089
1e-10	0.0954095	0.831949	11.0681	85.243	-0.860177
1e-10	0.159986	0.834693	11.2343	84.4309	-0.86168
1e-10	0.26827	0.838132	11.37	83.7474	-0.862693
1e-10	0.449843	0.84194	11.4768	83.1916	-0.863307
1e-10	0.754312	0.845699	11.5573	82.7583	-0.86363
1e-10	1.26486	0.849041	11.6155	82.4362	-0.863766
1e-10	2.12095	0.851759	11.6555	82.2083	-0.863798
1e-10	3.55648	0.853764	11.6821	82.0545	-0.863789
1e-10	5.96362	0.855104	11.6991	81.9546	-0.863774
1e-10	10	0.856022	11.7097	81.8915	-0.863753
1.67683e-10	1e-10	1.13878	0.400342	128.219	0.479779
1.67683e-10	1.67683e-10	1.13698	0.455979	128.01	0.427509
1.67683e-10	2.81177e-10	1.13496	0.519219	127.772	0.372233
1.67683e-10	4.71487e-10	1.13269	0.590907	127.503	0.314332
1.67683e-10	7.90604e-10	1.13007	0.67189	127.198	0.254266
1.67683e-10	1.32571e-09	1.12717	0.763165	126.854	0.19256
1.67683e-10	2.223e-09	1.12391	0.865688	126.468	0.129788
1.67683e-10	3.72759e-09	1.12029	0.980457	126.034	0.0665629
1.67683e-10	6.25055e-09	1.11626	1.10848	125.55	0.00349665
1.67683e-10	1.04811e-08	1.11179	1.25075	125.012	-0.058818
1.67683e-10	1.75751e-08	1.10687	1.40825	124.415	-0.119828
1.67683e-10	2.94705e-08	1.10147	1.58187	123.756	-0.179031
1.67683e-10	4.94171e-08	1.09553	1.77243	123.032	-0.236025
1.67683e-10	8.28643e-08	1.08907	1.98063	122.239	-0.290436
1.67683e-10	1.3895e-07	1.08208	2.20712	121.375	-0.342042
1.67683e-10	2.32995e-07	1.07456	2.45235	120.437	-0.39065
1.67683e-10	3.90694e-07	1.06649	2.71638	119.425	-0.436147
1.67683e-10	6.55129e-07	1.05789	2.99923	118.339	-0.4785
1.67683e-10	1.09854e-06	1.0488	3.30088	117.176	-0.517759
1.67683e-10	1.84207e-06	1.0392	3.62048	115.941	-0.55396
1.67683e-10	3.08884e-06	1.02916	3.95745	114.635	-0.587229
1.67683e-10	5.17947e-06	1.01878	4.31078	113.26	-0.617688
1.67683e-10	8.68511e-06	1.00802	4.67907	111.821	-0.645507
1.67683e-10	1.45635e-05	0.997028	5.06073	110.323	-0.670826
1.67683e-10	2.44205e-05	0.985887	5.45386	108.774	-0.693812
1.67683e-10	4.09492e-05	0.974634	5.85632	107.179	-0.714642
1.67683e-10	6.86649e-05	0.963453	6.26572	105.548	-0.733454
1.67683e-10	0.00011514	0.952355	6.67946	103.891	-0.750425
1.67683e-10	0.00019307	0.941531	7.09472	102.216	-0.765679
1.67683e-10	0.000323746	0.93108	7.5085	100.536	-0.779354
1.67683e-10	0.000542868	0.921128	7.91769	98.8611	-0.791572
1.67683e-10	0.000910298	0.9118	8.31904	97.205	-0.802445
1.67683e-10	0.00152642	0.903228	8.70928	95.58	-0.812072
1.67683e-10	0.00255955	0.895537	9.08511	93.9992	-0.820545
1.67683e-10	0.00429193	0.888845	9.44326	92.4756	-0.827945
1.67683e-10	0.00719686	0.883282	9.78063	91.0222	-0.834342
1.67683e-10	0.0120679	0.878923	10.0943	89.6515	-0.839806
1.67683e-10	0.0202359	0.875867	10.3816	88.3749	-0.844394
1.67683e-10	0.0339322	0.874188	10.6405	87.2029	-0.848162
1.67683e-10	0.0568987	0.873778	10.8693	86.1445	-0.851184
1.67683e-10	0.0954095	0.874701	11.067	85.2068	-0.853505
1.67683e-10	0.159986	0.876758	11.2334	84.3948	-0.855203
1.67683e-10	0.26827	0.879711	11.3692	83.7113	-0.856361
1.67683e-10	0.449843	0.883149	11.476	83.1554	-0.857086
1.67683e-10	0.754312	0.886627	11.5567	82.7221	-0.857493
1.67683e-10	1.26486	0.889817	11.6149	82.3999	-0.857682
1.67683e-10	2.12095	0.892426	11.655	82.1721	-0.857751
1.67683e-10	3.55648	0.894358	11.6816	82.0182	-0.857767
1.67683e-10	5.96362	0.895675	11.6986	81.9182	-0.857765
1.67683e-10	10	0.896562	11.7092	81.8551	-0.857754
2.81177e-10	1e-10	1.23359	0.399977	128.131	0.510304
2.81177e-10	1.67683e-10	1.23161	0.455572	127.922	0.459961
2.81177e-10	2.81177e-10	1.22935	0.518749	127.685	0.406498
2.81177e-10	4.71487e-10	1.22682	0.590375	127.416	0.350235
2.81177e-10	7.90604e-10	1.22394	0.671311	127.112	0.291588
2.81177e-10	1.32571e-09	1.22069	0.762497	126.769	0.231038
2.81177e-10	2.223e-09	1.21705	0.864932	126.383	0.169128
2.81177e-10	3.72759e-09	1.21301	0.97961	125.95	0.106449
2.81177e-10	6.25055e-09	1.20852	1.10754	125.467	0.0436
2.81177e-10	1.04811e-08	1.20358	1.24972	124.929	-0.0188068
2.81177e-10	1.75751e-08	1.19807	1.40709	124.333	-0.0802348
2.81177e-10	2.94705e-08	1.19199	1.58059	123.676	-0.140159
2.81177e-10	4.94171e-08	1.18534	1.77104	122.952	-0.198112
2.81177e-10	8.28643e-08	1.17812	1.9791	122.161	-0.253701
2.81177e-10	1.3895e-07	1.17027	2.20547	121.298	-0.306658
2.81177e-10	2.32995e-07	1.16183	2.45056	120.362	-0.356753
2.81177e-10	3.90694e-07	1.15275	2.71446	119.351	-0.403834
2.81177e-10	6.55129e-07	1.14306	2.99717	118.266	-0.447827
2.81177e-10	1.09854e-06	1.13279	3.2987	117.105	-0.488752
2.81177e-10	1.84207e-06	1.12194	3.61818	115.872	-0.526618
2.81177e-10	3.08884e-06	1.11057	3.95503	114.567	-0.561526
2.81177e-10	5.17947e-06	1.09876	4.30825	113.194	-0.593579
2.81177e-10	8.68511e-06	1.0865	4.67645	111.757	-0.622937
2.81177e-10	1.45635e-05	1.07393	5.05802	110.261	-0.649726
2.81177e-10	2.44205e-05	1.06113	5.45109	108.713	-0.674111
2.81177e-10	4.09492e-05	1.04819	5.85351	107.12	-0.696251
2.81177e-10	6.86649e-05	1.03522	6.26289	105.491	-0.716304
2.81177e-10	0.00011514	1.02235	6.67661	103.835	-0.734418
2.81177e-10	0.00019307	1.00968	7.09188	102.162	-0.750743
2.81177e-10	0.000323746	0.99741	7.5057	100.483	-0.765401
2.81177e-10	0.000542868	0.985562	7.91495	98.8103	-0.778538
2.81177e-10	0.000910298	0.974381	8.31639	97.1557	-0.790248
2.81177e-10	0.00152642	0.96398	8.70674	95.532	-0.80064
2.81177e-10	0.00255955	0.954515	9.08269	93.9524	-0.809805
2.81177e-10	0.00429193	0.946091	9.44099	92.43	-0.817833
2.81177e-10	0.00719686	0.938863	9.77852	90.9776	-0.824796
2.81177e-10	0.0120679	0.932957	10.0923	89.6077	-0.830761
2.81177e-10	0.0202359	0.928458	10.3799	88.3318	-0.835792
2.81177e-10	0.0339322	0.925456	10.6389	87.1604	-0.839947
2.81177e-10	0.0568987	0.923904	10.8679	86.1024	-0.843297
2.81177e-10	0.0954095	0.923774	11.0658	85.165	-0.845903
2.81177e-10	0.159986	0.924978	11.2323	84.3533	-0.847831
2.81177e-10	0.26827	0.927218	11.3682	83.6699	-0.849177
2.81177e-10	0.449843	0.930116	11.4752	83.1141	-0.850046
2.81177e-10	0.754312	0.933232	11.5559	82.6808	-0.850553
2.81177e-10	1.26486	0.936163	11.6142	82.3586	-0.850815
2.81177e-10	2.12095	0.938577	11.6544	82.1308	-0.850936
2.81177e-10	3.55648	0.940408	11.681	81.9769	-0.850982
2.81177e-10	5.96362	0.941664	11.698	81.8769	-0.850999
2.81177e-10	10	0.942523	11.7087	81.8138	-0.850999
4.71487e-10	1e-10	1.34144	0.399586	128.031	0.540977
4.71487e-10	1.67683e-10	1.33923	0.455117	127.823	0.49272
4.71487e-10	2.81177e-10	1.33675	0.518257	127.586	0.441235
4.71487e-10	4.71487e-10	1.3339	0.589792	127.318	0.386813
4.71487e-10	7.90604e-10	1.33066	0.67063	127.014	0.329802
4.71487e-10	1.32571e-09	1.32708	0.761754	126.671	0.270641
4.71487e-10	2.223e-09	1.32303	0.864098	126.286	0.209834
4.71487e-10	3.72759e-09	1.31858	0.978697	125.854	0.147952
4.71487e-10	6.25055e-09	1.31352	1.1065	125.372	0.0855444
4.71487e-10	1.04811e-08	1.30796	1.24855	124.835	0.0232356
4.71487e-10	1.75751e-08	1.30181	1.40581	124.24	-0.0384114
4.71487e-10	2.94705e-08	1.29508	1.57919	123.584	-0.0988462
4.71487e-10	4.94171e-08	1.28764	1.7695	122.862	-0.157619
4.71487e-10	8.28643e-08	1.27954	1.97743	122.071	-0.214274
4.71487e-10	1.3895e-07	1.27075	2.20364	121.21	-0.268504
4.71487e-10	2.32995e-07	1.26128	2.44859	120.275	-0.320041
4.71487e-10	3.90694e-07	1.25108	2.71234	119.266	-0.368684
4.71487e-10	6.55129e-07	1.24019	2.99491	118.183	-0.414328
4.71487e-10	1.09854e-06	1.22862	3.29628	117.024	-0.45695
4.71487e-10	1.84207e-06	1.21637	3.61563	115.792	-0.496536
4.71487e-10	3.08884e-06	1.20351	3.95235	114.489	-0.53315
4.71487e-10	5.17947e-06	1.19013	4.30545	113.118	-0.566878
4.71487e-10	8.68511e-06	1.17619	4.67354	111.683	-0.597864
4.71487e-10	1.45635e-05	1.16189	5.05502	110.189	-0.626216
4.71487e-10	2.44205e-05	1.14725	5.44802	108.643	-0.652099
4.71487e-10	4.09492e-05	1.13242	5.85038	107.052	-0.675653
4.71487e-10	6.86649e-05	1.11748	6.25973	105.425	-0.697046
4.71487e-10	0.00011514	1.10258	6.67345	103.771	-0.716415
4.71487e-10	0.00019307	1.08786	7.08873	102.1	-0.733908
4.71487e-10	0.000323746	1.0735	7.50259	100.423	-0.749652
4.71487e-10	0.000542868	1.05956	7.9119	98.7517	-0.763793
4.71487e-10	0.000910298	1.04628	8.31343	97.0987	-0.776428
4.71487e-10	0.00152642	1.03381	8.7039	95.4766	-0.787669
4.71487e-10	0.00255955	1.02229	9.07998	93.8984	-0.797611
4.71487e-10	0.00429193	1.0119	9.43845	92.3772	-0.806342
4.71487e-10	0.00719686	1.00277	9.77615	90.926	-0.813939
4.71487e-10	0.0120679	0.995052	10.0902	89.557	-0.820472
4.71487e-10	0.0202359	0.988855	10.3779	88.282	-0.82601
4.71487e-10	0.0339322	0.984244	10.6372	87.1114	-0.830616
4.71487e-10	0.0568987	0.981316	10.8663	86.0539	-0.834344
4.71487e-10	0.0954095	0.979937	11.0644	85.117	-0.837278
4.71487e-10	0.159986	0.98007	11.2311	84.3056	-0.83948
4.71487e-10	0.26827	0.981414	11.3672	83.6225	-0.841049
4.71487e-10	0.449843	0.983603	11.4743	83.067	-0.842092
4.71487e-10	0.754312	0.986224	11.5551	82.6338	-0.842725
4.71487e-10	1.26486	0.988721	11.6135	82.3117	-0.843088
4.71487e-10	2.12095	0.990901	11.6537	82.0839	-0.843269
4.71487e-10	3.55648	0.992591	11.6803	81.93	-0.843353
4.71487e-10	5.96362	0.993715	11.6974	81.8301	-0.8434
4.71487e-10	10	0.994509	11.7081	81.767	-0.843416
7.90604e-10	1e-10	1.46368	0.399175	127.917	0.571438
7.90604e-10	1.67683e-10	1.46117	0.454614	127.71	0.525402
7.90604e-10	2.81177e-10	1.45838	0.517662	127.474	0.476063
7.90604e-10	4.71487e-10	1.45527	0.589153	127.206	0.423648
7.90604e-10	7.90604e-10	1.45168	0.669911	126.903	0.368481
7.90604e-10	1.32571e-09	1.44772	0.760961	126.561	0.310936
7.90604e-10	2.223e-09	1.44319	0.86319	126.176	0.251477
7.90604e-10	3.72759e-09	1.43816	0.977658	125.745	0.190621
7.90604e-10	6.25055e-09	1.43258	1.10536	125.264	0.12893
7.90604e-10	1.04811e-08	1.42643	1.2473	124.728	0.0669955
7.90604e-10	1.75751e-08	1.41953	1.40442	124.135	0.00535269
7.90604e-10	2.94705e-08	1.41197	1.57764	123.479	-0.0554162
7.90604e-10	4.94171e-08	1.40372	1.76781	122.758	-0.114801
7.90604e-10	8.28643e-08	1.39462	1.97558	121.97	-0.17238
7.90604e-10	1.3895e-07	1.38479	2.20163	121.11	-0.227759
7.90604e-10	2.32995e-07	1.37418	2.44642	120.177	-0.280646
7.90604e-10	3.90694e-07	1.36274	2.71	119.17	-0.330798
7.90604e-10	6.55129e-07	1.35051	2.99241	118.088	-0.378065
7.90604e-10	1.09854e-06	1.33753	3.29363	116.931	-0.422379
7.90604e-10	1.84207e-06	1.3237	3.61281	115.701	-0.46371
7.90604e-10	3.08884e-06	1.30918	3.9494	114.4	-0.502078
7.90604e-10	5.17947e-06	1.29405	4.30236	113.031	-0.537543
7.90604e-10	8.68511e-06	1.27827	4.67033	111.598	-0.570228
7.90604e-10	1.45635e-05	1.262	5.05171	110.107	-0.600235
7.90604e-10	2.44205e-05	1.24534	5.44462	108.563	-0.627699
7.90604e-10	4.09492e-05	1.2284	5.84691	106.974	-0.652764
7.90604e-10	6.86649e-05	1.21129	6.25622	105.35	-0.675584
7.90604e-10	0.00011514	1.19415	6.66993	103.697	-0.696302
7.90604e-10	0.00019307	1.17712	7.08522	102.028	-0.715064
7.90604e-10	0.000323746	1.1604	7.49912	100.354	-0.731995
7.90604e-10	0.000542868	1.14414	7.90851	98.6843	-0.747226
7.90604e-10	0.000910298	1.12851	8.31014	97.0332	-0.760876
7.90604e-10	0.00152642	1.11369	8.70073	95.4128	-0.77305
7.90604e-10	0.00255955	1.09987	9.07697	93.8362	-0.783848
7.90604e-10	0.00429193	1.08722	9.43561	92.3165	-0.79336
7.90604e-10	0.00719686	1.07591	9.77351	90.8666	-0.801665
7.90604e-10	0.0120679	1.06611	10.0878	89.4989	-0.808836
7.90604e-10	0.0202359	1.05794	10.3757	88.2249	-0.814943
7.90604e-10	0.0339322	1.05149	10.6352	87.0551	-0.820053
7.90604e-10	0.0568987	1.04688	10.8646	85.9984	-0.824223
7.90604e-10	0.0954095	1.04398	11.0629	85.0621	-0.827538
7.90604e-10	0.159986	1.04281	11.2298	84.2513	-0.830059
7.90604e-10	0.26827	1.04305	11.3661	83.5685	-0.83189
7.90604e-10	0.449843	1.04434	11.4733	83.0134	-0.833141
7.90604e-10	0.754312	1.04624	11.5543	82.5804	-0.833936
7.90604e-10	1.26486	1.04828	11.6127	82.2585	-0.834408
7.90604e-10	2.12095	1.0501	11.653	82.0308	-0.834669
7.90604e-10	3.55648	1.05156	11.6796	81.8769	-0.834806
7.90604e-10	5.96362	1.05255	11.6967	81.777	-0.834885
7.90604e-10	10	1.05325	11.7074	81.714	-0.834923
1.32571e-09	1e-10	1.60168	0.398694	127.789	0.601381
1.32571e-09	1.67683e-10	1.59896	0.454097	127.582	0.557637
1.32571e-09	2.81177e-10	1.59583	0.517049	127.347	0.510573
1.32571e-09	4.71487e-10	1.59233	0.588439	127.079	0.460339
1.32571e-09	7.90604e-10	1.58841	0.66914	126.777	0.407197
1.32571e-09	1.32571e-09	1.58391	0.760043	126.436	0.351487
1.32571e-09	2.223e-09	1.57892	0.862182	126.052	0.293611
1.32571e-09	3.72759e-09	1.57333	0.976537	125.622	0.23405
1.32571e-09	6.25055e-09	1.56715	1.10412	125.142	0.173337
1.32571e-09	1.04811e-08	1.56021	1.2459	124.608	0.112009
1.32571e-09	1.75751e-08	1.55255	1.40288	124.015	0.0506438
1.32571e-09	2.94705e-08	1.54417	1.57596	123.361	-0.0101888
1.32571e-09	4.94171e-08	1.53489	1.76595	122.642	-0.0700015
1.32571e-09	8.28643e-08	1.52475	1.97355	121.854	-0.12829
1.32571e-09	1.3895e-07	1.51376	2.19942	120.996	-0.184657
1.32571e-09	2.32995e-07	1.50189	2.44403	120.065	-0.238762
1.32571e-09	3.90694e-07	1.48907	2.70743	119.06	-0.290329
1.32571e-09	6.55129e-07	1.47533	2.98965	117.98	-0.339156
1.32571e-09	1.09854e-06	1.46074	3.2907	116.825	-0.385138
1.32571e-09	1.84207e-06	1.4452	3.60972	115.598	-0.428199
1.32571e-09	3.08884e-06	1.42887	3.94613	114.299	-0.468328
1.32571e-09	5.17947e-06	1.41176	4.29895	112.933	-0.505575
1.32571e-09	8.68511e-06	1.39398	4.66679	111.502	-0.54
1.32571e-09	1.45635e-05	1.37555	5.04805	110.013	-0.57172
1.32571e-09	2.44205e-05	1.35662	5.44086	108.472	-0.600847
1.32571e-09	4.09492e-05	1.33732	5.84308	106.886	-0.627509
1.32571e-09	6.86649e-05	1.31777	6.25234	105.263	-0.651849
1.32571e-09	0.00011514	1.29815	6.66603	103.614	-0.674003
1.32571e-09	0.00019307	1.27857	7.08134	101.947	-0.694118
1.32571e-09	0.000323746	1.25926	7.49528	100.274	-0.712319
1.32571e-09	0.000542868	1.24037	7.90474	98.6073	-0.728736
1.32571e-09	0.000910298	1.22211	8.30648	96.9582	-0.743486
1.32571e-09	0.00152642	1.20467	8.6972	95.3398	-0.756679
1.32571e-09	0.00255955	1.18825	9.07361	93.7651	-0.768414
1.32571e-09	0.00429193	1.17306	9.43245	92.247	-0.778784
1.32571e-09	0.00719686	1.15927	9.77057	90.7986	-0.787871
1.32571e-09	0.0120679	1.14709	10.0851	89.4323	-0.795749
1.32571e-09	0.0202359	1.13666	10.3733	88.1595	-0.802491
1.32571e-09	0.0339322	1.12808	10.633	86.9908	-0.808168
1.32571e-09	0.0568987	1.12147	10.8627	85.9351	-0.812841
1.32571e-09	0.0954095	1.11684	11.0612	84.9995	-0.816581
1.32571e-09	0.159986	1.11408	11.2283	84.1893	-0.819471
1.32571e-09	0.26827	1.11299	11.3648	83.5072	-0.821605
1.32571e-09	0.449843	1.11317	11.4722	82.9524	-0.8231
1.32571e-09	0.754312	1.11423	11.5533	82.5198	-0.82408
1.32571e-09	1.26486	1.11561	11.6118	82.1982	-0.824692
1.32571e-09	2.12095	1.11699	11.6521	81.9706	-0.825048
1.32571e-09	3.55648	1.11809	11.6789	81.817	-0.825257
1.32571e-09	5.96362	1.11898	11.696	81.7171	-0.825363
1.32571e-09	10	1.11947	11.7067	81.6541	-0.825439
2.223e-09	1e-10	1.75703	0.398156	127.645	0.630513
2.223e-09	1.67683e-10	1.75405	0.45351	127.438	0.58913
2.223e-09	2.81177e-10	1.75058	0.516375	127.203	0.544433
2.223e-09	4.71487e-10	1.74669	0.587668	126.937	0.496506
2.223e-09	7.90604e-10	1.7423	0.668254	126.635	0.44556
2.223e-09	1.32571e-09	1.73735	0.759067	126.295	0.391875
2.223e-09	2.223e-09	1.73182	0.861096	125.912	0.335809
2.223e-09	3.72759e-09	1.72558	0.975309	125.483	0.277788
2.223e-09	6.25055e-09	1.71865	1.10274	125.004	0.218302
2.223e-09	1.04811e-08	1.71096	1.24438	124.471	0.157877
2.223e-09	1.75751e-08	1.70243	1.40119	123.88	0.0970615
2.223e-09	2.94705e-08	1.69303	1.57409	123.228	0.0364068
2.223e-09	4.94171e-08	1.68271	1.76391	122.51	-0.0235578
2.223e-09	8.28643e-08	1.67142	1.97132	121.724	-0.0823267
2.223e-09	1.3895e-07	1.65913	2.197	120.868	-0.139484
2.223e-09	2.32995e-07	1.64586	2.44141	119.939	-0.19464
2.223e-09	3.90694e-07	1.63151	2.70461	118.936	-0.247479
2.223e-09	6.55129e-07	1.61612	2.98663	117.859	-0.297761
2.223e-09	1.09854e-06	1.59974	3.28748	116.706	-0.345337
2.223e-09	1.84207e-06	1.58232	3.60631	115.481	-0.390082
2.223e-09	3.08884e-06	1.56395	3.94255	114.185	-0.431963
2.223e-09	5.17947e-06	1.54469	4.29519	112.821	-0.470986
2.223e-09	8.68511e-06	1.52461	4.66287	111.393	-0.507195
2.223e-09	1.45635e-05	1.5038	5.04401	109.907	-0.540671
2.223e-09	2.44205e-05	1.48238	5.43671	108.368	-0.571509
2.223e-09	4.09492e-05	1.46048	5.83885	106.785	-0.599831
2.223e-09	6.86649e-05	1.43825	6.24806	105.165	-0.625763
2.223e-09	0.00011514	1.41586	6.66172	103.518	-0.649435
2.223e-09	0.00019307	1.39344	7.07704	101.854	-0.670989
2.223e-09	0.000323746	1.37124	7.49103	100.184	-0.690544
2.223e-09	0.000542868	1.34944	7.90056	98.5195	-0.70823
2.223e-09	0.000910298	1.32824	8.30242	96.8728	-0.724164
2.223e-09	0.00152642	1.30787	8.69329	95.2566	-0.738456
2.223e-09	0.00255955	1.28858	9.06989	93.6839	-0.751202
2.223e-09	0.00429193	1.2705	9.42894	92.1678	-0.762511
2.223e-09	0.00719686	1.25394	9.7673	90.7212	-0.772451
2.223e-09	0.0120679	1.23905	10.082	89.3564	-0.781108
2.223e-09	0.0202359	1.22605	10.3705	88.085	-0.78855
2.223e-09	0.0339322	1.21505	10.6306	86.9175	-0.794853
2.223e-09	0.0568987	1.20615	10.8605	85.8629	-0.800086
2.223e-09	0.0954095	1.19944	11.0593	84.9283	-0.804313
2.223e-09	0.159986	1.19486	11.2267	84.119	-0.807615
2.223e-09	0.26827	1.19215	11.3634	83.4375	-0.8101
2.223e-09	0.449843	1.19102	11.4709	82.8834	-0.811874
2.223e-09	0.754312	1.19099	11.5522	82.4513	-0.813078
2.223e-09	1.26486	1.19159	11.6108	82.13	-0.813848
2.223e-09	2.12095	1.19241	11.6512	81.9027	-0.814318
2.223e-09	3.55648	1.19314	11.678	81.7492	-0.814603
2.223e-09	5.96362	1.19375	11.6951	81.6495	-0.814763
2.223e-09	10	1.19412	11.7059	81.5866	-0.814865
3.72759e-09	1e-10	1.9315	0.397605	127.483	0.658577
3.72759e-09	1.67683e-10	1.92819	0.452869	127.277	0.619607
3.72759e-09	2.81177e-10	1.92435	0.515643	127.043	0.57734
3.72759e-09	4.71487e-10	1.92004	0.586835	126.777	0.531819
3.72759e-09	7.90604e-10	1.91516	0.667306	126.476	0.483202
3.72759e-09	1.32571e-09	1.90967	0.758002	126.137	0.431712
3.72759e-09	2.223e-09	1.9035	0.859893	125.755	0.377655
3.72759e-09	3.72759e-09	1.89663	0.973978	125.327	0.321412
3.72759e-09	6.25055e-09	1.88887	1.10124	124.85	0.263413
3.72759e-09	1.04811e-08	1.8803	1.24271	124.318	0.204161
3.72759e-09	1.75751e-08	1.87081	1.39934	123.728	0.144174
3.72759e-09	2.94705e-08	1.86034	1.57205	123.077	0.0839899
3.72759e-09	4.94171e-08	1.84883	1.76167	122.362	0.0241405
3.72759e-09	8.28643e-08	1.83622	1.96887	121.578	-0.0348607
3.72759e-09	1.3895e-07	1.82251	2.19434	120.724	-0.0925673
3.72759e-09	2.32995e-07	1.80768	2.43852	119.797	-0.148565
3.72759e-09	3.90694e-07	1.79167	2.70151	118.796	-0.202493
3.72759e-09	6.55129e-07	1.77442	2.98331	117.721	-0.25409
3.72759e-09	1.09854e-06	1.75609	3.28394	116.572	-0.303143
3.72759e-09	1.84207e-06	1.73655	3.60256	115.349	-0.349497
3.72759e-09	3.08884e-06	1.71593	3.9386	114.056	-0.393076
3.72759e-09	5.17947e-06	1.69431	4.29106	112.695	-0.433849
3.72759e-09	8.68511e-06	1.67169	4.65858	111.27	-0.471841
3.72759e-09	1.45635e-05	1.64825	5.03956	109.787	-0.507088
3.72759e-09	2.44205e-05	1.62406	5.43214	108.251	-0.539679
3.72759e-09	4.09492e-05	1.59928	5.83419	106.671	-0.569708
3.72759e-09	6.86649e-05	1.57409	6.24333	105.054	-0.597287
3.72759e-09	0.00011514	1.54859	6.65697	103.41	-0.62255
3.72759e-09	0.00019307	1.52306	7.07229	101.749	-0.645609
3.72759e-09	0.000323746	1.49768	7.48632	100.082	-0.66659
3.72759e-09	0.000542868	1.47261	7.89594	98.4201	-0.685627
3.72759e-09	0.000910298	1.44815	8.29792	96.776	-0.702824
3.72759e-09	0.00152642	1.42452	8.68896	95.1622	-0.718292
3.72759e-09	0.00255955	1.40196	9.06576	93.5919	-0.732136
3.72759e-09	0.00429193	1.38072	9.42504	92.0779	-0.744448
3.72759e-09	0.00719686	1.36102	9.76368	90.6332	-0.755316
3.72759e-09	0.0120679	1.34312	10.0787	89.2702	-0.764815
3.72759e-09	0.0202359	1.32717	10.3675	88.0004	-0.77303
3.72759e-09	0.0339322	1.31343	10.6279	86.8344	-0.780018
3.72759e-09	0.0568987	1.30195	10.8581	85.7811	-0.785865
3.72759e-09	0.0954095	1.2929	11.0572	84.8476	-0.790625
3.72759e-09	0.159986	1.28614	11.2249	84.0393	-0.794398
3.72759e-09	0.26827	1.28156	11.3618	83.3588	-0.797275
3.72759e-09	0.449843	1.27886	11.4696	82.8054	-0.79937
3.72759e-09	0.754312	1.2776	11.551	82.3738	-0.800819
3.72759e-09	1.26486	1.27722	11.6097	82.0531	-0.80178
3.72759e-09	2.12095	1.27734	11.6502	81.8261	-0.802384
3.72759e-09	3.55648	1.27763	11.677	81.6729	-0.802754
3.72759e-09	5.96362	1.2779	11.6942	81.5733	-0.802978
3.72759e-09	10	1.27811	11.705	81.5105	-0.803111
6.25055e-09	1e-10	2.1269	0.397015	127.301	0.685397
6.25055e-09	1.67683e-10	2.1232	0.452173	127.096	0.648849
6.25055e-09	2.81177e-10	2.119	0.514876	126.862	0.609035
6.25055e-09	4.71487e-10	2.11418	0.58593	126.597	0.565996
6.25055e-09	7.90604e-10	2.10881	0.666304	126.297	0.519801
6.25055e-09	1.32571e-09	2.10269	0.756845	125.959	0.470652
6.25055e-09	2.223e-09	2.09587	0.858595	125.579	0.418781
6.25055e-09	3.72759e-09	2.08814	0.972491	125.152	0.364517
6.25055e-09	6.25055e-09	2.07961	1.09961	124.676	0.308253
6.25055e-09	1.04811e-08	2.07006	1.24088	124.146	0.250436
6.25055e-09	1.75751e-08	2.05947	1.39731	123.558	0.191553
6.25055e-09	2.94705e-08	2.0478	1.56981	122.909	0.132128
6.25055e-09	4.94171e-08	2.03499	1.75921	122.195	0.0726838
6.25055e-09	8.28643e-08	2.02096	1.96619	121.414	0.0137362
6.25055e-09	1.3895e-07	2.00564	2.19141	120.562	-0.0442623
6.25055e-09	2.32995e-07	1.98908	2.43536	119.638	-0.100867
6.25055e-09	3.90694e-07	1.97122	2.6981	118.64	-0.155672
6.25055e-09	6.55129e-07	1.95194	2.97966	117.567	-0.208396
6.25055e-09	1.09854e-06	1.93147	3.28006	116.42	-0.25877
6.25055e-09	1.84207e-06	1.90958	3.59844	115.201	-0.306619
6.25055e-09	3.08884e-06	1.88649	3.93426	113.911	-0.351805
6.25055e-09	5.17947e-06	1.86218	4.28651	112.553	-0.394283
6.25055e-09	8.68511e-06	1.83684	4.65385	111.131	-0.434008
6.25055e-09	1.45635e-05	1.81043	5.03466	109.651	-0.471029
6.25055e-09	2.44205e-05	1.78319	5.42711	108.119	-0.505378
6.25055e-09	4.09492e-05	1.75523	5.82905	106.542	-0.53714
6.25055e-09	6.86649e-05	1.72671	6.23812	104.929	-0.566415
6.25055e-09	0.00011514	1.69786	6.65172	103.288	-0.593306
6.25055e-09	0.00019307	1.66885	7.06705	101.631	-0.617933
6.25055e-09	0.000323746	1.6399	7.48113	99.9664	-0.640413
6.25055e-09	0.000542868	1.61126	7.89084	98.3077	-0.660862
6.25055e-09	0.000910298	1.58319	8.29295	96.6665	-0.67939
6.25055e-09	0.00152642	1.55595	8.68417	95.0555	-0.696107
6.25055e-09	0.00255955	1.5298	9.06119	93.4877	-0.711113
6.25055e-09	0.00429193	1.505	9.42073	91.9762	-0.724504
6.25055e-09	0.00719686	1.48185	9.75966	90.5337	-0.736362
6.25055e-09	0.0120679	1.46053	10.075	89.1727	-0.746777
6.25055e-09	0.0202359	1.44134	10.3642	87.9047	-0.75582
6.25055e-09	0.0339322	1.42447	10.6249	86.7404	-0.763561
6.25055e-09	0.0568987	1.41004	10.8555	85.6885	-0.77008
6.25055e-09	0.0954095	1.39824	11.0549	84.7565	-0.775439
6.25055e-09	0.159986	1.38908	11.2229	83.9493	-0.77972
6.25055e-09	0.26827	1.38238	11.36	83.2698	-0.783027
6.25055e-09	0.449843	1.37779	11.4681	82.7173	-0.785488
6.25055e-09	0.754312	1.3751	11.5496	82.2865	-0.787214
6.25055e-09	1.26486	1.37361	11.6085	81.9663	-0.788384
6.25055e-09	2.12095	1.37288	11.6491	81.7399	-0.789144
6.25055e-09	3.55648	1.37259	11.676	81.587	-0.789618
6.25055e-09	5.96362	1.3725	11.6932	81.4876	-0.789907
6.25055e-09	10	1.37249	11.704	81.4249	-0.790083
1.04811e-08	1e-10	2.34516	0.396339	127.098	0.710859
1.04811e-08	1.67683e-10	2.3411	0.451418	126.894	0.676695
1.04811e-08	2.81177e-10	2.33641	0.513982	126.661	0.639361
1.04811e-08	4.71487e-10	2.33112	0.58494	126.397	0.598815
1.04811e-08	7.90604e-10	2.32512	0.665154	126.098	0.555122
1.04811e-08	1.32571e-09	2.31839	0.755586	125.761	0.508399
1.04811e-08	2.223e-09	2.31076	0.857144	125.382	0.458857
1.04811e-08	3.72759e-09	2.30223	0.970884	124.957	0.406753
1.04811e-08	6.25055e-09	2.29272	1.0978	124.482	0.35243
1.04811e-08	1.04811e-08	2.28212	1.23888	123.953	0.296291
1.04811e-08	1.75751e-08	2.27036	1.39509	123.368	0.238788
1.04811e-08	2.94705e-08	2.25739	1.56736	122.721	0.18041
1.04811e-08	4.94171e-08	2.24314	1.75652	122.009	0.121665
1.04811e-08	8.28643e-08	2.22746	1.96325	121.23	0.0630478
1.04811e-08	1.3895e-07	2.21042	2.18821	120.381	0.00504962
1.04811e-08	2.32995e-07	2.19197	2.43189	119.459	-0.0518875
1.04811e-08	3.90694e-07	2.172	2.69436	118.464	-0.107342
1.04811e-08	6.55129e-07	2.15052	2.97565	117.395	-0.160964
1.04811e-08	1.09854e-06	2.12762	3.27578	116.251	-0.212488
1.04811e-08	1.84207e-06	2.10317	3.59391	115.035	-0.261668
1.04811e-08	3.08884e-06	2.07732	3.92948	113.749	-0.308345
1.04811e-08	5.17947e-06	2.05013	4.28151	112.394	-0.352417
1.04811e-08	8.68511e-06	2.02169	4.64864	110.976	-0.393825
1.04811e-08	1.45635e-05	1.99207	5.02927	109.5	-0.432568
1.04811e-08	2.44205e-05	1.96145	5.42157	107.971	-0.46866
1.04811e-08	4.09492e-05	1.92999	5.8234	106.398	-0.502156
1.04811e-08	6.86649e-05	1.89782	6.23238	104.788	-0.533143
1.04811e-08	0.00011514	1.86521	6.64594	103.151	-0.561703
1.04811e-08	0.00019307	1.83235	7.06127	101.497	-0.58794
1.04811e-08	0.000323746	1.79951	7.4754	99.8366	-0.611961
1.04811e-08	0.000542868	1.76691	7.88521	98.1812	-0.633881
1.04811e-08	0.000910298	1.73484	8.28746	96.5432	-0.653804
1.04811e-08	0.00152642	1.7036	8.67888	94.9353	-0.671832
1.04811e-08	0.00255955	1.67349	9.05613	93.3704	-0.688062
1.04811e-08	0.00429193	1.64473	9.41596	91.8615	-0.702599
1.04811e-08	0.00719686	1.61767	9.75521	90.4215	-0.715522
1.04811e-08	0.0120679	1.59259	10.0709	89.0627	-0.726911
1.04811e-08	0.0202359	1.56976	10.3605	87.7968	-0.736843
1.04811e-08	0.0339322	1.54942	10.6216	86.6343	-0.745391
1.04811e-08	0.0568987	1.5317	10.8525	85.5842	-0.752636
1.04811e-08	0.0954095	1.51684	11.0523	84.6536	-0.75864
1.04811e-08	0.159986	1.50488	11.2206	83.8479	-0.763487
1.04811e-08	0.26827	1.49566	11.3581	83.1696	-0.76728
1.04811e-08	0.449843	1.48911	11.4664	82.6182	-0.770119
1.04811e-08	0.754312	1.48459	11.5481	82.1884	-0.772175
1.04811e-08	1.26486	1.48179	11.6071	81.8689	-0.773581
1.04811e-08	2.12095	1.48014	11.6478	81.643	-0.774506
1.04811e-08	3.55648	1.47921	11.6748	81.4904	-0.775094
1.04811e-08	5.96362	1.47869	11.6921	81.3913	-0.775459
1.04811e-08	10	1.47841	11.7029	81.3287	-0.775681
1.75751e-08	1e-10	2.58856	0.395639	126.872	0.734844
1.75751e-08	1.67683e-10	2.58405	0.450592	126.668	0.703034
1.75751e-08	2.81177e-10	2.57888	0.51304	126.436	0.668141
1.75751e-08	4.71487e-10	2.57305	0.583887	126.173	0.630092
1.75751e-08	7.90604e-10	2.56642	0.663957	125.875	0.588929
1.75751e-08	1.32571e-09	2.5589	0.754181	125.54	0.544725
1.75751e-08	2.223e-09	2.55046	0.855582	125.162	0.49761
1.75751e-08	3.72759e-09	2.54101	0.969125	124.738	0.447813
1.75751e-08	6.25055e-09	2.53043	1.09583	124.265	0.395614
1.75751e-08	1.04811e-08	2.51869	1.23669	123.739	0.341376
1.75751e-08	1.75751e-08	2.50561	1.39266	123.155	0.285498
1.75751e-08	2.94705e-08	2.49118	1.56468	122.51	0.228435
1.75751e-08	4.94171e-08	2.47531	1.75357	121.801	0.170668
1.75751e-08	8.28643e-08	2.4579	1.96002	121.025	0.112694
1.75751e-08	1.3895e-07	2.43893	2.1847	120.178	0.0549848
1.75751e-08	2.32995e-07	2.41837	2.42809	119.26	-0.00200396
1.75751e-08	3.90694e-07	2.39612	2.69026	118.268	-0.0578296
1.75751e-08	6.55129e-07	2.37219	2.97126	117.202	-0.112113
1.75751e-08	1.09854e-06	2.34661	3.27109	116.062	-0.164565
1.75751e-08	1.84207e-06	2.31933	3.58894	114.849	-0.214887
1.75751e-08	3.08884e-06	2.29047	3.92425	113.567	-0.262888
1.75751e-08	5.17947e-06	2.26003	4.27602	112.216	-0.308441
1.75751e-08	8.68511e-06	2.22819	4.64292	110.802	-0.351433
1.75751e-08	1.45635e-05	2.19502	5.02335	109.33	-0.391823
1.75751e-08	2.44205e-05	2.16067	5.41547	107.805	-0.429612
1.75751e-08	4.09492e-05	2.12533	5.81717	106.236	-0.464821
1.75751e-08	6.86649e-05	2.08915	6.22606	104.631	-0.497511
1.75751e-08	0.00011514	2.05242	6.63958	102.998	-0.527744
1.75751e-08	0.00019307	2.01533	7.05491	101.348	-0.555617
1.75751e-08	0.000323746	1.97815	7.46909	99.6908	-0.581222
1.75751e-08	0.000542868	1.94118	7.87899	98.0391	-0.604654
1.75751e-08	0.000910298	1.9047	8.28141	96.4047	-0.62602
1.75751e-08	0.00152642	1.86904	8.67303	94.8002	-0.645414
1.75751e-08	0.00255955	1.83451	9.05055	93.2385	-0.662931
1.75751e-08	0.00429193	1.8014	9.41069	91.7326	-0.678669
1.75751e-08	0.00719686	1.77008	9.75029	90.2953	-0.692705
1.75751e-08	0.0120679	1.7408	10.0664	88.939	-0.70513
1.75751e-08	0.0202359	1.71393	10.3563	87.6754	-0.716007
1.75751e-08	0.0339322	1.6897	10.6179	86.515	-0.725421
1.75751e-08	0.0568987	1.66832	10.8493	85.4668	-0.733444
1.75751e-08	0.0954095	1.65003	11.0495	84.538	-0.740143
1.75751e-08	0.159986	1.63489	11.2182	83.7338	-0.745603
1.75751e-08	0.26827	1.62292	11.356	83.057	-0.749914
1.75751e-08	0.449843	1.61388	11.4645	82.5069	-0.753199
1.75751e-08	0.754312	1.60747	11.5465	82.0781	-0.755591
1.75751e-08	1.26486	1.60321	11.6056	81.7594	-0.757252
1.75751e-08	2.12095	1.60051	11.6465	81.5341	-0.758358
1.75751e-08	3.55648	1.59874	11.6735	81.382	-0.759086
1.75751e-08	5.96362	1.59771	11.6908	81.2832	-0.759536
1.75751e-08	10	1.5971	11.7017	81.2209	-0.759813
2.94705e-08	1e-10	2.85941	0.394839	126.62	0.757339
2.94705e-08	1.67683e-10	2.85442	0.449677	126.417	0.727806
2.94705e-08	2.81177e-10	2.84874	0.512024	126.186	0.695293
2.94705e-08	4.71487e-10	2.84227	0.582704	125.924	0.659732
2.94705e-08	7.90604e-10	2.83495	0.66263	125.627	0.621093
2.94705e-08	1.32571e-09	2.82663	0.752668	125.293	0.579433
2.94705e-08	2.223e-09	2.81729	0.85387	124.917	0.534822
2.94705e-08	3.72759e-09	2.8068	0.967203	124.495	0.48744
2.94705e-08	6.25055e-09	2.79509	1.09368	124.024	0.437519
2.94705e-08	1.04811e-08	2.78202	1.23429	123.5	0.385361
2.94705e-08	1.75751e-08	2.76753	1.39	122.918	0.331333
2.94705e-08	2.94705e-08	2.75151	1.56174	122.276	0.275841
2.94705e-08	4.94171e-08	2.73387	1.75035	121.569	0.219329
2.94705e-08	8.28643e-08	2.71454	1.9565	120.796	0.162286
2.94705e-08	1.3895e-07	2.69342	2.18085	119.953	0.105157
2.94705e-08	2.32995e-07	2.67055	2.42392	119.037	0.0484105
2.94705e-08	3.90694e-07	2.64578	2.68576	118.049	-0.00749884
2.94705e-08	6.55129e-07	2.61909	2.96646	116.987	-0.0621894
2.94705e-08	1.09854e-06	2.59062	3.26596	115.85	-0.115313
2.94705e-08	1.84207e-06	2.5602	3.58349	114.642	-0.16656
2.94705e-08	3.08884e-06	2.52797	3.91851	113.363	-0.215706
2.94705e-08	5.17947e-06	2.49405	4.27	112.017	-0.262558
2.94705e-08	8.68511e-06	2.45843	4.63664	110.608	-0.307003
2.94705e-08	1.45635e-05	2.42135	5.01685	109.14	-0.348943
2.94705e-08	2.44205e-05	2.38287	5.40879	107.62	-0.388353
2.94705e-08	4.09492e-05	2.34324	5.81032	106.056	-0.425223
2.94705e-08	6.86649e-05	2.30267	6.21912	104.454	-0.45958
2.94705e-08	0.00011514	2.26135	6.63257	102.826	-0.491484
2.94705e-08	0.00019307	2.21959	7.0479	101.18	-0.520994
2.94705e-08	0.000323746	2.17766	7.46213	99.5276	-0.548193
2.94705e-08	0.000542868	2.13588	7.87214	97.8801	-0.573167
2.94705e-08	0.000910298	2.09453	8.27473	96.2496	-0.596012
2.94705e-08	0.00152642	2.05402	8.66658	94.6488	-0.616809
2.94705e-08	0.00255955	2.0146	9.04438	93.0906	-0.635663
2.94705e-08	0.00429193	1.97668	9.40487	91.588	-0.652652
2.94705e-08	0.00719686	1.94062	9.74486	90.1537	-0.667857
2.94705e-08	0.0120679	1.90672	10.0614	88.8003	-0.681367
2.94705e-08	0.0202359	1.87538	10.3518	87.5392	-0.693244
2.94705e-08	0.0339322	1.84684	10.6138	86.3811	-0.703572
2.94705e-08	0.0568987	1.82134	10.8457	85.3351	-0.712427
2.94705e-08	0.0954095	1.79921	11.0463	84.4082	-0.71987
2.94705e-08	0.159986	1.78059	11.2154	83.6059	-0.725979
2.94705e-08	0.26827	1.76546	11.3536	82.9307	-0.730856
2.94705e-08	0.449843	1.75379	11.4624	82.382	-0.734601
2.94705e-08	0.754312	1.74521	11.5447	81.9544	-0.737362
2.94705e-08	1.26486	1.73912	11.604	81.6368	-0.739323
2.94705e-08	2.12095	1.73522	11.645	81.4121	-0.740629
2.94705e-08	3.55648	1.73259	11.6721	81.2606	-0.741495
2.94705e-08	5.96362	1.73107	11.6895	81.1621	-0.742027
2.94705e-08	10	1.72998	11.7003	81.1	-0.742377
4.94171e-08	1e-10	3.16037	0.39402	126.34	0.778291
4.94171e-08	1.67683e-10	3.15486	0.448712	126.138	0.750963
4.94171e-08	2.81177e-10	3.14857	0.510902	125.908	0.720778
4.94171e-08	4.71487e-10	3.14142	0.581421	125.647	0.687646
4.94171e-08	7.90604e-10	3.13331	0.661153	125.352	0.651517
4.94171e-08	1.32571e-09	3.12413	0.751026	125.019	0.61239
4.94171e-08	2.223e-09	3.1138	0.85201	124.645	0.570322
4.94171e-08	3.72759e-09	3.10219	0.965108	124.225	0.52543
4.94171e-08	6.25055e-09	3.0892	1.09132	123.756	0.4779
4.94171e-08	1.04811e-08	3.07474	1.23168	123.233	0.42798
4.94171e-08	1.75751e-08	3.05865	1.38709	122.655	0.375992
4.94171e-08	2.94705e-08	3.04089	1.55853	122.015	0.322292
4.94171e-08	4.94171e-08	3.02133	1.74683	121.311	0.267293
4.94171e-08	8.28643e-08	2.99981	1.9526	120.541	0.211453
4.94171e-08	1.3895e-07	2.97637	2.17663	119.701	0.1552
4.94171e-08	2.32995e-07	2.95095	2.41935	118.79	0.0989894
4.94171e-08	3.90694e-07	2.9234	2.68083	117.805	0.0432825
4.94171e-08	6.55129e-07	2.89372	2.96115	116.747	-0.0115165
4.94171e-08	1.09854e-06	2.86202	3.26032	115.615	-0.0650573
4.94171e-08	1.84207e-06	2.82814	3.57751	114.411	-0.116986
4.94171e-08	3.08884e-06	2.79223	3.9122	113.137	-0.16705
4.94171e-08	5.17947e-06	2.75437	4.26339	111.796	-0.215028
4.94171e-08	8.68511e-06	2.71467	4.62974	110.391	-0.260753
4.94171e-08	1.45635e-05	2.67323	5.0097	108.928	-0.304112
4.94171e-08	2.44205e-05	2.63024	5.40143	107.413	-0.345033
4.94171e-08	4.09492e-05	2.5859	5.8028	105.854	-0.383479
4.94171e-08	6.86649e-05	2.54045	6.21147	104.258	-0.419453
4.94171e-08	0.00011514	2.49411	6.62486	102.634	-0.452984
4.94171e-08	0.00019307	2.44721	7.04018	100.993	-0.484113
4.94171e-08	0.000323746	2.40004	7.45447	99.3454	-0.512905
4.94171e-08	0.000542868	2.35294	7.8646	97.7024	-0.539432
4.94171e-08	0.000910298	2.30625	8.26737	96.0763	-0.563773
4.94171e-08	0.00152642	2.26034	8.65947	94.4796	-0.586011
4.94171e-08	0.00255955	2.21558	9.03758	92.9253	-0.60623
4.94171e-08	0.00429193	2.17237	9.39843	91.4263	-0.624508
4.94171e-08	0.00719686	2.13108	9.73885	89.9954	-0.640928
4.94171e-08	0.0120679	2.09208	10.0559	88.645	-0.655565
4.94171e-08	0.0202359	2.05578	10.3468	87.3868	-0.66849
4.94171e-08	0.0339322	2.02245	10.6093	86.2313	-0.679783
4.94171e-08	0.0568987	1.9925	10.8417	85.1876	-0.6895
4.94171e-08	0.0954095	1.96608	11.0428	84.263	-0.697733
4.94171e-08	0.159986	1.94353	11.2124	83.4626	-0.70454
4.94171e-08	0.26827	1.92491	11.351	82.7893	-0.710014
4.94171e-08	0.449843	1.91019	11.4602	82.2422	-0.714264
4.94171e-08	0.754312	1.89909	11.5426	81.816	-0.717433
4.94171e-08	1.26486	1.89112	11.6022	81.4995	-0.719695
4.94171e-08	2.12095	1.88573	11.6433	81.2758	-0.721231
4.94171e-08	3.55648	1.88217	11.6705	81.1248	-0.722243
4.94171e-08	5.96362	1.87991	11.6879	81.0267	-0.722887
4.94171e-08	10	1.87853	11.6988	80.9649	-0.723285
8.28643e-08	1e-10	3.49423	0.393082	126.029	0.797762
8.28643e-08	1.67683e-10	3.48816	0.447675	125.828	0.772513
8.28643e-08	2.81177e-10	3.48123	0.509721	125.599	0.744561
8.28643e-08	4.71487e-10	3.47332	0.580035	125.34	0.7138
8.28643e-08	7.90604e-10	3.46437	0.659592	125.046	0.680117
8.28643e-08	1.32571e-09	3.45422	0.749233	124.715	0.643516
8.28643e-08	2.223e-09	3.44278	0.849983	124.342	0.603993
8.28643e-08	3.72759e-09	3.42995	0.962841	123.924	0.561627
8.28643e-08	6.25055e-09	3.41556	1.08877	123.458	0.516568
8.28643e-08	1.04811e-08	3.39953	1.2288	122.938	0.46901
8.28643e-08	1.75751e-08	3.38173	1.3839	122.362	0.419215
8.28643e-08	2.94705e-08	3.36202	1.555	121.725	0.367502
8.28643e-08	4.94171e-08	3.34033	1.74294	121.025	0.314245
8.28643e-08	8.28643e-08	3.31648	1.94837	120.258	0.259858
8.28643e-08	1.3895e-07	3.29047	2.17198	119.422	0.204759
8.28643e-08	2.32995e-07	3.26224	2.41431	118.515	0.149373
8.28643e-08	3.90694e-07	3.23165	2.67544	117.534	0.0941609
8.28643e-08	6.55129e-07	3.19866	2.95533	116.481	0.0395399
8.28643e-08	1.09854e-06	3.16342	3.25411	115.353	-0.0141324
8.28643e-08	1.84207e-06	3.12573	3.57094	114.155	-0.0664823
8.28643e-08	3.08884e-06	3.08578	3.90527	112.885	-0.11722
8.28643e-08	5.17947e-06	3.04361	4.25612	111.549	-0.166104
8.28643e-08	8.68511e-06	2.99937	4.62216	110.15	-0.212923
8.28643e-08	1.45635e-05	2.95316	5.00186	108.692	-0.257535
8.28643e-08	2.44205e-05	2.90519	5.39335	107.183	-0.299831
8.28643e-08	4.09492e-05	2.85566	5.79453	105.629	-0.339746
8.28643e-08	6.86649e-05	2.80484	6.20307	104.039	-0.377249
8.28643e-08	0.00011514	2.75299	6.61639	102.42	-0.412344
8.28643e-08	0.00019307	2.70043	7.03169	100.785	-0.445049
8.28643e-08	0.000323746	2.64749	7.44603	99.1422	-0.475408
8.28643e-08	0.000542868	2.59454	7.8563	97.5042	-0.503477
8.28643e-08	0.000910298	2.54195	8.25926	95.883	-0.529321
8.28643e-08	0.00152642	2.49013	8.65163	94.2909	-0.553009
8.28643e-08	0.00255955	2.43949	9.03008	92.7409	-0.574615
8.28643e-08	0.00429193	2.39043	9.39134	91.2458	-0.594215
8.28643e-08	0.00719686	2.34341	9.73222	89.8186	-0.611878
8.28643e-08	0.0120679	2.29878	10.0497	88.4717	-0.627684
8.28643e-08	0.0202359	2.25699	10.3412	87.2166	-0.641696
8.28643e-08	0.0339322	2.21844	10.6043	86.0639	-0.653983
8.28643e-08	0.0568987	2.18349	10.8372	85.0228	-0.664613
8.28643e-08	0.0954095	2.15235	11.0389	84.1006	-0.673672
8.28643e-08	0.159986	2.12547	11.209	83.3025	-0.681207
8.28643e-08	0.26827	2.10308	11.3481	82.6311	-0.687301
8.28643e-08	0.449843	2.08489	11.4576	82.086	-0.692097
8.28643e-08	0.754312	2.07099	11.5404	81.6614	-0.695697
8.28643e-08	1.26486	2.06098	11.6002	81.346	-0.698272
8.28643e-08	2.12095	2.054	11.6414	81.1232	-0.700046
8.28643e-08	3.55648	2.04922	11.6687	80.973	-0.701236
8.28643e-08	5.96362	2.04624	11.6862	80.8754	-0.701985
8.28643e-08	10	2.04449	11.6972	80.8137	-0.702439
1.3895e-07	1e-10	3.86411	0.392087	125.685	0.815757
1.3895e-07	1.67683e-10	3.8574	0.446504	125.485	0.792512
1.3895e-07	2.81177e-10	3.84975	0.508374	125.257	0.7667
1.3895e-07	4.71487e-10	3.84103	0.578529	124.999	0.738196
1.3895e-07	7.90604e-10	3.83113	0.657853	124.707	0.706904
1.3895e-07	1.32571e-09	3.81994	0.747281	124.378	0.672763
1.3895e-07	2.223e-09	3.8073	0.847772	124.007	0.635764
1.3895e-07	3.72759e-09	3.79311	0.960337	123.592	0.595941
1.3895e-07	6.25055e-09	3.77722	1.08599	123.127	0.553387
1.3895e-07	1.04811e-08	3.75948	1.22568	122.611	0.508267
1.3895e-07	1.75751e-08	3.73978	1.38045	122.037	0.460786
1.3895e-07	2.94705e-08	3.71797	1.55118	121.404	0.411221
1.3895e-07	4.94171e-08	3.69392	1.73872	120.707	0.3599
1.3895e-07	8.28643e-08	3.66748	1.94372	119.945	0.307199
1.3895e-07	1.3895e-07	3.63865	2.16695	119.113	0.253497
1.3895e-07	2.32995e-07	3.60734	2.40884	118.209	0.199214
1.3895e-07	3.90694e-07	3.57339	2.66951	117.234	0.144785
1.3895e-07	6.55129e-07	3.53679	2.94899	116.185	0.0906293
1.3895e-07	1.09854e-06	3.49764	3.24734	115.063	0.0371099
1.3895e-07	1.84207e-06	3.45578	3.56373	113.87	-0.015378
1.3895e-07	3.08884e-06	3.41137	3.89767	112.606	-0.0665345
1.3895e-07	5.17947e-06	3.36447	4.24814	111.275	-0.11608
1.3895e-07	8.68511e-06	3.31523	4.61385	109.882	-0.163779
1.3895e-07	1.45635e-05	3.26378	4.99323	108.431	-0.209453
1.3895e-07	2.44205e-05	3.21033	5.38444	106.927	-0.252958
1.3895e-07	4.09492e-05	3.15511	5.78543	105.379	-0.294202
1.3895e-07	6.86649e-05	3.09838	6.19382	103.795	-0.333123
1.3895e-07	0.00011514	3.04045	6.60707	102.183	-0.369693
1.3895e-07	0.00019307	2.98167	7.02235	100.553	-0.403905
1.3895e-07	0.000323746	2.92239	7.43676	98.9161	-0.435785
1.3895e-07	0.000542868	2.86301	7.84715	97.2837	-0.465365
1.3895e-07	0.000910298	2.80395	8.25033	95.6677	-0.492694
1.3895e-07	0.00152642	2.74563	8.64299	94.0807	-0.517829
1.3895e-07	0.00255955	2.68851	9.02181	92.5354	-0.540831
1.3895e-07	0.00429193	2.63304	9.38351	91.0448	-0.561765
1.3895e-07	0.00719686	2.57968	9.7249	89.6217	-0.580696
1.3895e-07	0.0120679	2.52888	10.043	88.2785	-0.597693
1.3895e-07	0.0202359	2.48107	10.335	87.0268	-0.61282
1.3895e-07	0.0339322	2.43672	10.5988	85.8773	-0.626141
1.3895e-07	0.0568987	2.39621	10.8324	84.8391	-0.637722
1.3895e-07	0.0954095	2.35996	11.0347	83.9196	-0.647626
1.3895e-07	0.159986	2.32829	11.2053	83.1239	-0.655924
1.3895e-07	0.26827	2.30157	11.3448	82.4548	-0.662684
1.3895e-07	0.449843	2.2797	11.4548	81.9117	-0.668033
1.3895e-07	0.754312	2.26271	11.5379	81.4888	-0.672086
1.3895e-07	1.26486	2.25017	11.5979	81.175	-0.67502
1.3895e-07	2.12095	2.2414	11.6393	80.9532	-0.677048
1.3895e-07	3.55648	2.23551	11.6668	80.8037	-0.678397
1.3895e-07	5.96362	2.23172	11.6844	80.7066	-0.67926
1.3895e-07	10	2.22934	11.6953	80.6453	-0.6798
2.32995e-07	1e-10	4.27337	0.391009	125.304	0.832342
2.32995e-07	1.67683e-10	4.26597	0.445261	125.105	0.810979
2.32995e-07	2.81177e-10	4.25753	0.506948	124.879	0.787197
2.32995e-07	4.71487e-10	4.24791	0.576894	124.622	0.760863
2.32995e-07	7.90604e-10	4.23699	0.655987	124.332	0.731866
2.32995e-07	1.32571e-09	4.22464	0.745158	124.005	0.700125
2.32995e-07	2.223e-09	4.2107	0.845389	123.636	0.665595
2.32995e-07	3.72759e-09	4.19501	0.957626	123.223	0.628297
2.32995e-07	6.25055e-09	4.17745	1.08293	122.762	0.58827
2.32995e-07	1.04811e-08	4.15785	1.22228	122.248	0.545632
2.32995e-07	1.75751e-08	4.13607	1.37667	121.678	0.500549
2.32995e-07	2.94705e-08	4.11194	1.54697	121.048	0.453261
2.32995e-07	4.94171e-08	4.08527	1.73401	120.356	0.404046
2.32995e-07	8.28643e-08	4.05606	1.93864	119.597	0.353216
2.32995e-07	1.3895e-07	4.02414	2.16142	118.77	0.30114
2.32995e-07	2.32995e-07	3.98944	2.40283	117.871	0.248208
2.32995e-07	3.90694e-07	3.95181	2.66302	116.901	0.194834
2.32995e-07	6.55129e-07	3.91122	2.94204	115.858	0.141419
2.32995e-07	1.09854e-06	3.8678	3.23991	114.741	0.0883389
2.32995e-07	1.84207e-06	3.82134	3.55584	113.553	0.0359894
2.32995e-07	3.08884e-06	3.77203	3.88935	112.296	-0.0153137
2.32995e-07	5.17947e-06	3.71994	4.23938	110.972	-0.0652624
2.32995e-07	8.68511e-06	3.66521	4.60471	109.585	-0.113605
2.32995e-07	1.45635e-05	3.60801	4.98375	108.14	-0.160124
2.32995e-07	2.44205e-05	3.54853	5.37469	106.644	-0.204652
2.32995e-07	4.09492e-05	3.48705	5.77545	105.102	-0.247061
2.32995e-07	6.86649e-05	3.42384	6.18367	103.524	-0.287258
2.32995e-07	0.00011514	3.35923	6.59681	101.919	-0.325188
2.32995e-07	0.00019307	3.29361	7.01207	100.296	-0.360816
2.32995e-07	0.000323746	3.22737	7.42653	98.6651	-0.394144
2.32995e-07	0.000542868	3.16092	7.83708	97.0387	-0.425183
2.32995e-07	0.000910298	3.09474	8.24049	95.4285	-0.453961
2.32995e-07	0.00152642	3.02928	8.63346	93.8471	-0.48052
2.32995e-07	0.00255955	2.96505	9.01269	92.307	-0.504907
2.32995e-07	0.00429193	2.90252	9.37487	90.8212	-0.527176
2.32995e-07	0.00719686	2.84221	9.71682	89.4026	-0.547384
2.32995e-07	0.0120679	2.78461	10.0355	88.0635	-0.565588
2.32995e-07	0.0202359	2.73023	10.3282	86.8156	-0.581845
2.32995e-07	0.0339322	2.67948	10.5926	85.6696	-0.596224
2.32995e-07	0.0568987	2.63292	10.8269	84.6346	-0.608774
2.32995e-07	0.0954095	2.59101	11.0299	83.718	-0.619554
2.32995e-07	0.159986	2.55406	11.2012	82.925	-0.628642
2.32995e-07	0.26827	2.5225	11.3413	82.2585	-0.636101
2.32995e-07	0.449843	2.49656	11.4517	81.7175	-0.642026
2.32995e-07	0.754312	2.47619	11.5351	81.2966	-0.646545
2.32995e-07	1.26486	2.4611	11.5954	80.9842	-0.649829
2.32995e-07	2.12095	2.45026	11.637	80.7637	-0.652132
2.32995e-07	3.55648	2.44299	11.6646	80.615	-0.653663
2.32995e-07	5.96362	2.43829	11.6823	80.5185	-0.654647
2.32995e-07	10	2.43541	11.6933	80.4575	-0.655253
3.90694e-07	1e-10	4.72563	0.389835	124.882	0.847585
3.90694e-07	1.67683e-10	4.71748	0.443905	124.685	0.82799
3.90694e-07	2.81177e-10	4.70817	0.505388	124.461	0.806126
3.90694e-07	4.71487e-10	4.69757	0.575114	124.206	0.781852
3.90694e-07	7.90604e-10	4.68553	0.653948	123.918	0.755052
3.90694e-07	1.32571e-09	4.6719	0.742839	123.592	0.725623
3.90694e-07	2.223e-09	4.65652	0.842748	123.226	0.693505
3.90694e-07	3.72759e-09	4.63922	0.954664	122.816	0.658676
3.90694e-07	6.25055e-09	4.61984	1.0796	122.357	0.621155
3.90694e-07	1.04811e-08	4.5982	1.21856	121.847	0.581018
3.90694e-07	1.75751e-08	4.57413	1.37251	121.281	0.538392
3.90694e-07	2.94705e-08	4.5474	1.54231	120.655	0.49347
3.90694e-07	4.94171e-08	4.518	1.72894	119.967	0.446467
3.90694e-07	8.28643e-08	4.4857	1.93309	119.213	0.397678
3.90694e-07	1.3895e-07	4.45038	2.15535	118.39	0.34743
3.90694e-07	2.32995e-07	4.41198	2.39625	117.497	0.296074
3.90694e-07	3.90694e-07	4.37033	2.6559	116.532	0.244004
3.90694e-07	6.55129e-07	4.32546	2.93452	115.494	0.19159
3.90694e-07	1.09854e-06	4.27726	3.23176	114.385	0.139232
3.90694e-07	1.84207e-06	4.22575	3.54718	113.204	0.0872984
3.90694e-07	3.08884e-06	4.17107	3.88021	111.953	0.0361258
3.90694e-07	5.17947e-06	4.11328	4.22979	110.636	-0.0139655
3.90694e-07	8.68511e-06	4.05253	4.59471	109.256	-0.0626993
3.90694e-07	1.45635e-05	3.989	4.97338	107.818	-0.109835
3.90694e-07	2.44205e-05	3.92291	5.36399	106.329	-0.155173
3.90694e-07	4.09492e-05	3.85455	5.76448	104.795	-0.198558
3.90694e-07	6.86649e-05	3.78422	6.17252	103.225	-0.239868
3.90694e-07	0.00011514	3.71229	6.58554	101.626	-0.279015
3.90694e-07	0.00019307	3.63916	7.00078	100.01	-0.315944
3.90694e-07	0.000323746	3.56527	7.4153	98.3865	-0.350622
3.90694e-07	0.000542868	3.49107	7.826	96.7669	-0.383044
3.90694e-07	0.000910298	3.41706	8.22965	95.1632	-0.413214
3.90694e-07	0.00152642	3.34377	8.62297	93.5877	-0.441156
3.90694e-07	0.00255955	3.27172	9.00263	92.0534	-0.466902
3.90694e-07	0.00429193	3.20145	9.36534	90.573	-0.490491
3.90694e-07	0.00719686	3.13351	9.7079	89.1593	-0.511968
3.90694e-07	0.0120679	3.06845	10.0273	87.8247	-0.531381
3.90694e-07	0.0202359	3.00679	10.3207	86.581	-0.548785
3.90694e-07	0.0339322	2.9491	10.5859	85.4388	-0.564226
3.90694e-07	0.0568987	2.89586	10.821	84.4073	-0.577764
3.90694e-07	0.0954095	2.84764	11.0247	83.4939	-0.58945
3.90694e-07	0.159986	2.80492	11.1966	82.7039	-0.599341
3.90694e-07	0.26827	2.76817	11.3373	82.0401	-0.607504
3.90694e-07	0.449843	2.73771	11.4482	81.5016	-0.614024
3.90694e-07	0.754312	2.71358	11.5321	81.0828	-0.61903
3.90694e-07	1.26486	2.69554	11.5927	80.7721	-0.62269
3.90694e-07	2.12095	2.68268	11.6345	80.5528	-0.62525
3.90694e-07	3.55648	2.67383	11.6622	80.4051	-0.626977
3.90694e-07	5.96362	2.66805	11.68	80.3092	-0.628095
3.90694e-07	10	2.66451	11.6911	80.2487	-0.628784
6.55129e-07	1e-10	5.22485	0.388556	124.417	0.861561
6.55129e-07	1.67683e-10	5.21588	0.442433	124.221	0.843616
6.55129e-07	2.81177e-10	5.20562	0.503692	123.999	0.823554
6.55129e-07	4.71487e-10	5.19394	0.573165	123.746	0.80123
6.55129e-07	7.90604e-10	5.18067	0.651741	123.46	0.776511
6.55129e-07	1.32571e-09	5.16565	0.740315	123.137	0.749299
6.55129e-07	2.223e-09	5.1487	0.839889	122.773	0.719504
6.55129e-07	3.72759e-09	5.12963	0.951433	122.366	0.687083
6.55129e-07	6.25055e-09	5.10826	1.07597	121.911	0.652027
6.55129e-07	1.04811e-08	5.08439	1.21449	121.404	0.614378
6.55129e-07	1.75751e-08	5.05783	1.36798	120.842	0.574223
6.55129e-07	2.94705e-08	5.02841	1.53736	120.22	0.531704
6.55129e-07	4.94171e-08	4.99587	1.72342	119.537	0.487024
6.55129e-07	8.28643e-08	4.96019	1.92702	118.788	0.440407
6.55129e-07	1.3895e-07	4.92116	2.14872	117.971	0.392148
6.55129e-07	2.32995e-07	4.87866	2.389	117.083	0.342567
6.55129e-07	3.90694e-07	4.8326	2.64807	116.125	0.292022
6.55129e-07	6.55129e-07	4.783	2.92615	115.093	0.240863
6.55129e-07	1.09854e-06	4.72966	3.22282	113.99	0.189481
6.55129e-07	1.84207e-06	4.67263	3.53768	112.817	0.138234
6.55129e-07	3.08884e-06	4.61208	3.87019	111.573	0.0874634
6.55129e-07	5.17947e-06	4.54802	4.21928	110.264	0.037496
6.55129e-07	8.68511e-06	4.48068	4.58371	108.892	-0.0113655
6.55129e-07	1.45635e-05	4.41021	4.96197	107.462	-0.0588721
6.55129e-07	2.44205e-05	4.33687	5.35223	105.981	-0.104794
6.55129e-07	4.09492e-05	4.26096	5.75244	104.455	-0.148949
6.55129e-07	6.86649e-05	4.18282	6.16027	102.893	-0.191185
6.55129e-07	0.00011514	4.10285	6.57316	101.302	-0.231389
6.55129e-07	0.00019307	4.02148	6.98837	99.6939	-0.269475
6.55129e-07	0.000323746	3.93919	7.40295	98.078	-0.305389
6.55129e-07	0.000542868	3.85648	7.8138	96.4657	-0.339094
6.55129e-07	0.000910298	3.7739	8.21772	94.8691	-0.370577
6.55129e-07	0.00152642	3.692	8.61141	93.3004	-0.399841
6.55129e-07	0.00255955	3.61138	8.99155	91.7723	-0.426898
6.55129e-07	0.00429193	3.53261	9.35483	90.2978	-0.451775
6.55129e-07	0.00719686	3.4563	9.69805	88.8895	-0.4745
6.55129e-07	0.0120679	3.38305	10.0182	87.56	-0.495113
6.55129e-07	0.0202359	3.31344	10.3124	86.3208	-0.513654
6.55129e-07	0.0339322	3.24811	10.5784	85.1827	-0.530163
6.55129e-07	0.0568987	3.18756	10.8143	84.155	-0.544696
6.55129e-07	0.0954095	3.13245	11.0189	83.2451	-0.557291
6.55129e-07	0.159986	3.08339	11.1916	82.4584	-0.568
6.55129e-07	0.26827	3.04091	11.3329	81.7976	-0.576882
6.55129e-07	0.449843	3.00551	11.4444	81.2617	-0.58401
6.55129e-07	0.754312	2.97723	11.5287	80.8452	-0.589515
6.55129e-07	1.26486	2.95588	11.5896	80.5365	-0.593568
6.55129e-07	2.12095	2.94061	11.6317	80.3186	-0.596411
6.55129e-07	3.55648	2.93013	11.6595	80.1719	-0.598328
6.55129e-07	5.96362	2.92332	11.6774	80.0766	-0.599565
6.55129e-07	10	2.91901	11.6886	80.0166	-0.600343
1.09854e-06	1e-10	5.7753	0.38717	123.904	0.874346
1.09854e-06	1.67683e-10	5.76542	0.440828	123.71	0.85794
1.09854e-06	2.81177e-10	5.75413	0.501851	123.489	0.839561
1.09854e-06	4.71487e-10	5.74127	0.571053	123.238	0.819067
1.09854e-06	7.90604e-10	5.72666	0.649324	122.955	0.796322
1.09854e-06	1.32571e-09	5.71012	0.737588	122.634	0.771209
1.09854e-06	2.223e-09	5.69145	0.836767	122.274	0.743646
1.09854e-06	3.72759e-09	5.67045	0.947916	121.87	0.71355
1.09854e-06	6.25055e-09	5.6469	1.07203	121.418	0.680893
1.09854e-06	1.04811e-08	5.6206	1.21007	120.915	0.645695
1.09854e-06	1.75751e-08	5.59132	1.36305	120.357	0.608002
1.09854e-06	2.94705e-08	5.55888	1.53189	119.741	0.567921
1.09854e-06	4.94171e-08	5.52306	1.71744	119.062	0.525601
1.09854e-06	8.28643e-08	5.48369	1.92045	118.318	0.481249
1.09854e-06	1.3895e-07	5.44055	2.14148	117.508	0.435117
1.09854e-06	2.32995e-07	5.39363	2.38112	116.627	0.387473
1.09854e-06	3.90694e-07	5.34283	2.63967	115.674	0.338636
1.09854e-06	6.55129e-07	5.28792	2.917	114.651	0.288964
1.09854e-06	1.09854e-06	5.2289	3.21296	113.556	0.238803
1.09854e-06	1.84207e-06	5.16588	3.52729	112.389	0.188492
1.09854e-06	3.08884e-06	5.09887	3.85916	111.154	0.138391
1.09854e-06	5.17947e-06	5.028	4.2077	109.853	0.0888179
1.09854e-06	8.68511e-06	4.95342	4.57166	108.489	0.0400795
1.09854e-06	1.45635e-05	4.87536	4.94946	107.068	-0.00754185
1.09854e-06	2.44205e-05	4.79408	5.33932	105.596	-0.0538062
1.09854e-06	4.09492e-05	4.7099	5.73921	104.079	-0.0985068
1.09854e-06	6.86649e-05	4.6232	6.1468	102.526	-0.141467
1.09854e-06	0.00011514	4.53441	6.55954	100.944	-0.182543
1.09854e-06	0.00019307	4.44401	6.97471	99.3442	-0.221627
1.09854e-06	0.000323746	4.35251	7.38935	97.7367	-0.258633
1.09854e-06	0.000542868	4.26048	7.80037	96.1325	-0.293503
1.09854e-06	0.000910298	4.16849	8.20458	94.5436	-0.3262
1.09854e-06	0.00152642	4.07717	8.59868	92.9823	-0.356703
1.09854e-06	0.00255955	3.98713	8.97933	91.4612	-0.385009
1.09854e-06	0.00429193	3.89905	9.34324	89.9931	-0.411122
1.09854e-06	0.00719686	3.81356	9.68719	88.5908	-0.43506
1.09854e-06	0.0120679	3.73133	10.0081	87.2667	-0.456845
1.09854e-06	0.0202359	3.65302	10.3033	86.0325	-0.476505
1.09854e-06	0.0339322	3.57926	10.5702	84.899	-0.494077
1.09854e-06	0.0568987	3.51071	10.807	83.8754	-0.509598
1.09854e-06	0.0954095	3.44808	11.0124	82.9694	-0.523103
1.09854e-06	0.159986	3.39207	11.186	82.1862	-0.534633
1.09854e-06	0.26827	3.34331	11.328	81.5286	-0.544239
1.09854e-06	0.449843	3.30243	11.4401	80.9957	-0.551987
1.09854e-06	0.754312	3.26977	11.5249	80.5816	-0.557981
1.09854e-06	1.26486	3.24476	11.5862	80.275	-0.562435
1.09854e-06	2.12095	3.22681	11.6285	80.0588	-0.565569
1.09854e-06	3.55648	3.21455	11.6566	79.9131	-0.567679
1.09854e-06	5.96362	3.20653	11.6745	79.8186	-0.569046
1.09854e-06	10	3.20143	11.6858	79.7591	-0.569908
1.84207e-06	1e-10	6.38153	0.385656	123.34	0.886022
1.84207e-06	1.67683e-10	6.37066	0.439114	123.147	0.871034
1.84207e-06	2.81177e-10	6.35824	0.499842	122.928	0.854233
1.84207e-06	4.71487e-10	6.3441	0.568746	122.68	0.835452
1.84207e-06	7.90604e-10	6.32802	0.6467	122.398	0.814559
1.84207e-06	1.32571e-09	6.30983	0.734567	122.081	0.791446
1.84207e-06	2.223e-09	6.28928	0.833371	121.724	0.765994
1.84207e-06	3.72759e-09	6.26616	0.944081	121.323	0.738128
1.84207e-06	6.25055e-09	6.24024	1.0677	120.875	0.707798
1.84207e-06	1.04811e-08	6.21128	1.20524	120.377	0.674984
1.84207e-06	1.75751e-08	6.17904	1.35765	119.823	0.639722
1.84207e-06	2.94705e-08	6.14331	1.5259	119.212	0.602071
1.84207e-06	4.94171e-08	6.10386	1.71084	118.539	0.562149
1.84207e-06	8.28643e-08	6.06047	1.9132	117.801	0.52012
1.84207e-06	1.3895e-07	6.01297	2.13362	116.997	0.476193
1.84207e-06	2.32995e-07	5.96116	2.3725	116.123	0.430622
1.84207e-06	3.90694e-07	5.90512	2.63035	115.178	0.383666
1.84207e-06	6.55129e-07	5.84451	2.90699	114.162	0.335659
1.84207e-06	1.09854e-06	5.77934	3.20224	113.076	0.286931
1.84207e-06	1.84207e-06	5.70973	3.51589	111.918	0.237799
1.84207e-06	3.08884e-06	5.63567	3.84711	110.692	0.188612
1.84207e-06	5.17947e-06	5.55733	4.19505	109.4	0.139687
1.84207e-06	8.68511e-06	5.47485	4.55842	108.045	0.0913388
1.84207e-06	1.45635e-05	5.38848	4.93571	106.634	0.0438553
1.84207e-06	2.44205e-05	5.2985	5.32515	105.171	-0.00250852
1.84207e-06	4.09492e-05	5.20527	5.72467	103.664	-0.0475212
1.84207e-06	6.86649e-05	5.10919	6.13201	102.12	-0.0909885
1.84207e-06	0.00011514	5.01076	6.54458	100.548	-0.132737
1.84207e-06	0.00019307	4.91047	6.95968	98.958	-0.172636
1.84207e-06	0.000323746	4.80888	7.37439	97.3596	-0.210576
1.84207e-06	0.000542868	4.70662	7.7856	95.7644	-0.246472
1.84207e-06	0.000910298	4.60432	8.19012	94.184	-0.280262
1.84207e-06	0.00152642	4.50266	8.58465	92.6307	-0.311904
1.84207e-06	0.00255955	4.40233	8.96587	91.1172	-0.341372
1.84207e-06	0.00429193	4.30404	9.33046	89.6562	-0.368655
1.84207e-06	0.00719686	4.20849	9.6752	88.2605	-0.39375
1.84207e-06	0.0120679	4.11642	9.99702	86.9423	-0.416666
1.84207e-06	0.0202359	4.02855	10.2931	85.7136	-0.437419
1.84207e-06	0.0339322	3.94559	10.561	84.5851	-0.456029
1.84207e-06	0.0568987	3.86828	10.7989	83.5661	-0.472525
1.84207e-06	0.0954095	3.79741	11.0053	82.6642	-0.48693
1.84207e-06	0.159986	3.73375	11.1797	81.8849	-0.499278
1.84207e-06	0.26827	3.67816	11.3226	81.2308	-0.509604
1.84207e-06	0.449843	3.63141	11.4354	80.701	-0.51796
1.84207e-06	0.754312	3.59357	11.5208	80.2898	-0.524482
1.84207e-06	1.26486	3.56482	11.5824	79.9854	-0.529312
1.84207e-06	2.12095	3.54407	11.625	79.7708	-0.532725
1.84207e-06	3.55648	3.52981	11.6533	79.6263	-0.535034
1.84207e-06	5.96362	3.52036	11.6714	79.5327	-0.536542
1.84207e-06	10	3.51442	11.6827	79.4737	-0.537488
3.08884e-06	1e-10	7.0484	0.384006	122.718	0.896667
3.08884e-06	1.67683e-10	7.03647	0.437181	122.528	0.883007
3.08884e-06	2.81177e-10	7.02282	0.497651	122.311	0.867654
3.08884e-06	4.71487e-10	7.00728	0.56624	122.065	0.850468
3.08884e-06	7.90604e-10	6.98962	0.643817	121.786	0.831317
3.08884e-06	1.32571e-09	6.96962	0.731303	121.472	0.810074
3.08884e-06	2.223e-09	6.94703	0.829679	121.118	0.786625
3.08884e-06	3.72759e-09	6.92162	0.939915	120.721	0.760883
3.08884e-06	6.25055e-09	6.89312	1.06301	120.278	0.732782
3.08884e-06	1.04811e-08	6.86127	1.19997	119.784	0.702286
3.08884e-06	1.75751e-08	6.82581	1.35178	119.236	0.669394
3.08884e-06	2.94705e-08	6.78649	1.51939	118.63	0.634141
3.08884e-06	4.94171e-08	6.74306	1.70362	117.963	0.596618
3.08884e-06	8.28643e-08	6.6953	1.90527	117.232	0.556943
3.08884e-06	1.3895e-07	6.64301	2.12497	116.435	0.515289
3.08884e-06	2.32995e-07	6.58598	2.36315	115.569	0.47187
3.08884e-06	3.90694e-07	6.52411	2.62011	114.632	0.426937
3.08884e-06	6.55129e-07	6.45728	2.89597	113.625	0.380757
3.08884e-06	1.09854e-06	6.38547	3.19054	112.547	0.333639
3.08884e-06	1.84207e-06	6.30868	3.50341	111.398	0.285899
3.08884e-06	3.08884e-06	6.22694	3.83392	110.182	0.237854
3.08884e-06	5.17947e-06	6.14044	4.18116	108.9	0.189823
3.08884e-06	8.68511e-06	6.04933	4.5439	107.556	0.142112
3.08884e-06	1.45635e-05	5.95388	4.92063	106.155	0.0950158
3.08884e-06	2.44205e-05	5.85439	5.30959	104.703	0.0487997
3.08884e-06	4.09492e-05	5.7513	5.70877	103.206	0.00371125
3.08884e-06	6.86649e-05	5.64498	6.11576	101.673	-0.0400303
3.08884e-06	0.00011514	5.53598	6.52817	100.112	-0.082243
3.08884e-06	0.00019307	5.42486	6.94321	98.5317	-0.122763
3.08884e-06	0.000323746	5.31224	7.35796	96.9434	-0.161459
3.08884e-06	0.000542868	5.19884	7.76939	95.3578	-0.19822
3.08884e-06	0.000910298	5.08526	8.17423	93.7868	-0.232963
3.08884e-06	0.00152642	4.97228	8.56923	92.2424	-0.265625
3.08884e-06	0.00255955	4.86066	8.95106	90.7373	-0.296154
3.08884e-06	0.00429193	4.75119	9.31639	89.2841	-0.32452
3.08884e-06	0.00719686	4.64463	9.66199	87.8955	-0.350702
3.08884e-06	0.0120679	4.54179	9.98478	86.584	-0.374692
3.08884e-06	0.0202359	4.44346	10.2819	85.3613	-0.39649
3.08884e-06	0.0339322	4.35041	10.5509	84.2382	-0.416105
3.08884e-06	0.0568987	4.26351	10.7899	83.2241	-0.433549
3.08884e-06	0.0954095	4.1836	10.9974	82.3268	-0.448837
3.08884e-06	0.159986	4.1116	11.1728	81.5517	-0.461989
3.08884e-06	0.26827	4.04855	11.3166	80.9015	-0.473023
3.08884e-06	0.449843	3.9951	11.4302	80.3752	-0.482006
3.08884e-06	0.754312	3.95209	11.5161	79.9668	-0.489005
3.08884e-06	1.26486	3.91905	11.5783	79.6647	-0.494228
3.08884e-06	2.12095	3.89508	11.6212	79.452	-0.497936
3.08884e-06	3.55648	3.87862	11.6496	79.3089	-0.500443
3.08884e-06	5.96362	3.86794	11.6678	79.216	-0.502061
3.08884e-06	10	3.86092	11.6792	79.1577	-0.503104
5.17947e-06	1e-10	7.7812	0.382224	122.035	0.906357
5.17947e-06	1.67683e-10	7.7681	0.43512	121.847	0.893915
5.17947e-06	2.81177e-10	7.75312	0.495282	121.632	0.879908
5.17947e-06	4.71487e-10	7.73605	0.56352	121.389	0.864205
5.17947e-06	7.90604e-10	7.71666	0.640717	121.113	0.84667
5.17947e-06	1.32571e-09	7.6947	0.727768	120.802	0.827184
5.17947e-06	2.223e-09	7.6699	0.825652	120.452	0.805627
5.17947e-06	3.72759e-09	7.64198	0.935359	120.06	0.7819
5.17947e-06	6.25055e-09	7.61067	1.05789	119.621	0.755925
5.17947e-06	1.04811e-08	7.57568	1.19423	119.132	0.727652
5.17947e-06	1.75751e-08	7.53672	1.3454	118.59	0.697054
5.17947e-06	2.94705e-08	7.4935	1.51229	117.99	0.664152
5.17947e-06	4.94171e-08	7.44576	1.69578	117.33	0.628995
5.17947e-06	8.28643e-08	7.39323	1.89664	116.606	0.591676
5.17947e-06	1.3895e-07	7.33569	2.11551	115.816	0.55233
5.17947e-06	2.32995e-07	7.27297	2.35287	114.958	0.511134
5.17947e-06	3.90694e-07	7.20486	2.60899	114.031	0.468304
5.17947e-06	6.55129e-07	7.13129	2.88398	113.033	0.424083
5.17947e-06	1.09854e-06	7.05219	3.17771	111.965	0.378741
5.17947e-06	1.84207e-06	6.96754	3.48972	110.827	0.332575
5.17947e-06	3.08884e-06	6.87746	3.81946	109.621	0.285877
5.17947e-06	5.17947e-06	6.78206	4.16598	108.35	0.238955
5.17947e-06	8.68511e-06	6.68155	4.52801	107.017	0.192116
5.17947e-06	1.45635e-05	6.57624	4.90416	105.627	0.145646
5.17947e-06	2.44205e-05	6.46637	5.29256	104.187	0.0998226
5.17947e-06	4.09492e-05	6.35247	5.69119	102.702	0.0549067
5.17947e-06	6.86649e-05	6.23495	6.09794	101.181	0.011109
5.17947e-06	0.00011514	6.11441	6.51013	99.6306	-0.031345
5.17947e-06	0.00019307	5.99147	6.92508	98.062	-0.0722803
5.17947e-06	0.000323746	5.86679	7.33989	96.4848	-0.111542
5.17947e-06	0.000542868	5.74111	7.75149	94.9101	-0.148999
5.17947e-06	0.000910298	5.61519	8.1567	93.3493	-0.184543
5.17947e-06	0.00152642	5.48984	8.55221	91.8146	-0.218086
5.17947e-06	0.00255955	5.36584	8.93467	90.3188	-0.24956
5.17947e-06	0.00429193	5.24413	9.30081	88.8741	-0.278907
5.17947e-06	0.00719686	5.12552	9.64737	87.4933	-0.306091
5.17947e-06	0.0120679	5.01089	9.97122	86.189	-0.331084
5.17947e-06	0.0202359	4.9011	10.2695	84.9728	-0.353869
5.17947e-06	0.0339322	4.79705	10.5398	83.8556	-0.374439
5.17947e-06	0.0568987	4.69965	10.7799	82.8469	-0.392793
5.17947e-06	0.0954095	4.60988	10.9886	81.9545	-0.408933
5.17947e-06	0.159986	4.52879	11.1652	81.184	-0.422863
5.17947e-06	0.26827	4.45749	11.31	80.5379	-0.434596
5.17947e-06	0.449843	4.39715	11.4244	80.0152	-0.444156
5.17947e-06	0.754312	4.34809	11.511	79.6101	-0.451658
5.17947e-06	1.26486	4.3104	11.5736	79.3106	-0.457265
5.17947e-06	2.12095	4.28302	11.6169	79.0999	-0.461251
5.17947e-06	3.55648	4.26427	11.6455	78.9581	-0.463945
5.17947e-06	5.96362	4.25178	11.6639	78.8664	-0.465713
5.17947e-06	10	4.24387	11.6754	78.8086	-0.466827
8.68511e-06	1e-10	8.58539	0.380317	121.285	0.915162
8.68511e-06	1.67683e-10	8.57101	0.432913	121.099	0.903839
8.68511e-06	2.81177e-10	8.55459	0.492735	120.887	0.891076
8.68511e-06	4.71487e-10	8.53587	0.560592	120.647	0.876745
8.68511e-06	7.90604e-10	8.5146	0.637355	120.374	0.860717
8.68511e-06	1.32571e-09	8.49051	0.723936	120.067	0.842869
8.68511e-06	2.223e-09	8.4633	0.821306	119.721	0.823082
8.68511e-06	3.72759e-09	8.43268	0.93042	119.333	0.801258
8.68511e-06	6.25055e-09	8.39832	1.05232	118.9	0.777302
8.68511e-06	1.04811e-08	8.35992	1.18801	118.416	0.751148
8.68511e-06	1.75751e-08	8.31716	1.33843	117.88	0.722766
8.68511e-06	2.94705e-08	8.26971	1.50455	117.287	0.692141
8.68511e-06	4.94171e-08	8.21729	1.68723	116.634	0.659302
8.68511e-06	8.28643e-08	8.15959	1.88723	115.918	0.624313
8.68511e-06	1.3895e-07	8.09638	2.10521	115.137	0.587279
8.68511e-06	2.32995e-07	8.02743	2.34163	114.288	0.548343
8.68511e-06	3.90694e-07	7.95258	2.59684	113.37	0.507681
8.68511e-06	6.55129e-07	7.87167	2.87089	112.383	0.465511
8.68511e-06	1.09854e-06	7.78464	3.16364	111.325	0.422075
8.68511e-06	1.84207e-06	7.6915	3.47478	110.198	0.377629
8.68511e-06	3.08884e-06	7.59232	3.80366	109.004	0.332456
8.68511e-06	5.17947e-06	7.48725	4.14932	107.745	0.286849
8.68511e-06	8.68511e-06	7.37652	4.51063	106.424	0.241092
8.68511e-06	1.45635e-05	7.2604	4.88606	105.047	0.195476
8.68511e-06	2.44205e-05	7.13922	5.27381	103.62	0.150278
8.68511e-06	4.09492e-05	7.01353	5.672	102.148	0.105753
8.68511e-06	6.86649e-05	6.88382	6.07831	100.639	0.0621438
8.68511e-06	0.00011514	6.75072	6.49021	99.1018	0.0196747
8.68511e-06	0.00019307	6.61485	6.90511	97.5454	-0.0214689
8.68511e-06	0.000323746	6.477	7.31997	95.9803	-0.0610981
8.68511e-06	0.000542868	6.33796	7.73179	94.4173	-0.0990653
8.68511e-06	0.000910298	6.19856	8.13737	92.8677	-0.135242
8.68511e-06	0.00152642	6.05967	8.53343	91.3437	-0.169516
8.68511e-06	0.00255955	5.92222	8.91664	89.8577	-0.201796
8.68511e-06	0.00429193	5.78713	9.28367	88.4223	-0.232008
8.68511e-06	0.00719686	5.65535	9.63125	87.0502	-0.260091
8.68511e-06	0.0120679	5.52783	9.95626	85.7537	-0.285999
8.68511e-06	0.0202359	5.40552	10.2558	84.5446	-0.309699
8.68511e-06	0.0339322	5.28943	10.5274	83.4339	-0.331164
8.68511e-06	0.0568987	5.18056	10.7689	82.4311	-0.350378
8.68511e-06	0.0954095	5.08017	10.9789	81.5439	-0.367315
8.68511e-06	0.159986	4.98913	11.1567	80.7783	-0.381993
8.68511e-06	0.26827	4.90887	11.3026	80.1367	-0.394395
8.68511e-06	0.449843	4.8406	11.4179	79.6181	-0.404545
8.68511e-06	0.754312	4.78516	11.5052	79.2164	-0.412518
8.68511e-06	1.26486	4.74236	11.5684	78.9198	-0.4185
8.68511e-06	2.12095	4.71126	11.6121	78.7112	-0.422758
8.68511e-06	3.55648	4.68983	11.641	78.571	-0.425648
8.68511e-06	5.96362	4.67568	11.6596	78.4802	-0.427535
8.68511e-06	10	4.66668	11.6712	78.4231	-0.428728
1.45635e-05	1e-10	9.46676	0.37819	120.464	0.923171
1.45635e-05	1.67683e-10	9.45101	0.430461	120.28	0.912875
1.45635e-05	2.81177e-10	9.43302	0.489913	120.071	0.901256
1.45635e-05	4.71487e-10	9.41252	0.557349	119.834	0.888193
1.45635e-05	7.90604e-10	9.38921	0.633671	119.565	0.873555
1.45635e-05	1.32571e-09	9.36282	0.719727	119.261	0.857233
1.45635e-05	2.223e-09	9.33301	0.816526	118.92	0.839101
1.45635e-05	3.72759e-09	9.29945	0.925045	118.537	0.819053
1.45635e-05	6.25055e-09	9.2618	1.04626	118.109	0.797001
1.45635e-05	1.04811e-08	9.2197	1.18121	117.632	0.772864
1.45635e-05	1.75751e-08	9.17282	1.33085	117.102	0.746593
1.45635e-05	2.94705e-08	9.12079	1.49613	116.516	0.718162
1.45635e-05	4.94171e-08	9.06329	1.67791	115.871	0.687575
1.45635e-05	8.28643e-08	9.00001	1.87698	115.164	0.654872
1.45635e-05	1.3895e-07	8.93065	2.09397	114.392	0.620129
1.45635e-05	2.32995e-07	8.85498	2.32939	113.553	0.583456
1.45635e-05	3.90694e-07	8.77279	2.58358	112.645	0.544998
1.45635e-05	6.55129e-07	8.68393	2.8566	111.669	0.504945
1.45635e-05	1.09854e-06	8.58831	3.14835	110.623	0.463502
1.45635e-05	1.84207e-06	8.48595	3.45844	109.508	0.42091
1.45635e-05	3.08884e-06	8.3769	3.78637	108.326	0.377409
1.45635e-05	5.17947e-06	8.26138	4.13116	107.08	0.333283
1.45635e-05	8.68511e-06	8.13951	4.49158	105.773	0.288805
1.45635e-05	1.45635e-05	8.0116	4.86618	104.41	0.244252
1.45635e-05	2.44205e-05	7.87818	5.25331	102.997	0.199892
1.45635e-05	4.09492e-05	7.73973	5.65085	101.539	0.155996
1.45635e-05	6.86649e-05	7.59689	6.05703	100.042	0.112778
1.45635e-05	0.00011514	7.45007	6.46867	98.5191	0.0705097
1.45635e-05	0.00019307	7.30019	6.88331	96.9767	0.0293917
1.45635e-05	0.000323746	7.14796	7.29826	95.4248	-0.0104042
1.45635e-05	0.000542868	6.99433	7.7103	93.8746	-0.0486904
1.45635e-05	0.000910298	6.84021	8.11627	92.3374	-0.0853181
1.45635e-05	0.00152642	6.68656	8.51291	90.8251	-0.120159
1.45635e-05	0.00255955	6.53439	8.89687	89.3501	-0.153097
1.45635e-05	0.00429193	6.38469	9.26483	87.925	-0.184041
1.45635e-05	0.00719686	6.23851	9.61352	86.5623	-0.212907
1.45635e-05	0.0120679	6.09691	9.93979	85.2745	-0.23963
1.45635e-05	0.0202359	5.96093	10.2407	84.0733	-0.264158
1.45635e-05	0.0339322	5.83166	10.5137	82.9697	-0.286446
1.45635e-05	0.0568987	5.71025	10.7567	81.9733	-0.306459
1.45635e-05	0.0954095	5.59792	10.9681	81.0922	-0.324171
1.45635e-05	0.159986	5.49602	11.1473	80.3318	-0.339553
1.45635e-05	0.26827	5.406	11.2944	79.6951	-0.35259
1.45635e-05	0.449843	5.32926	11.4107	79.1808	-0.363289
1.45635e-05	0.754312	5.26677	11.4989	78.7828	-0.371718
1.45635e-05	1.26486	5.2185	11.5627	78.4892	-0.378053
1.45635e-05	2.12095	5.18335	11.6067	78.2829	-0.382571
1.45635e-05	3.55648	5.15908	11.636	78.1444	-0.385643
1.45635e-05	5.96362	5.14306	11.6547	78.0547	-0.387651
1.45635e-05	10	5.13285	11.6665	77.9983	-0.388921
2.44205e-05	1e-10	10.4313	0.375917	119.565	0.930432
2.44205e-05	1.67683e-10	10.4141	0.42783	119.384	0.921079
2.44205e-05	2.81177e-10	10.3944	0.486883	119.177	0.91051
2.44205e-05	4.71487e-10	10.372	0.553859	118.943	0.898615
2.44205e-05	7.90604e-10	10.3465	0.629656	118.678	0.885269
2.44205e-05	1.32571e-09	10.3176	0.715174	118.379	0.870355
2.44205e-05	2.223e-09	10.285	0.811376	118.043	0.853758
2.44205e-05	3.72759e-09	10.2483	0.91922	117.665	0.835376
2.44205e-05	6.25055e-09	10.2071	1.03969	117.243	0.815114
2.44205e-05	1.04811e-08	10.161	1.17383	116.772	0.79288
2.44205e-05	1.75751e-08	10.1097	1.32261	116.25	0.768619
2.44205e-05	2.94705e-08	10.0527	1.48697	115.672	0.742285
2.44205e-05	4.94171e-08	9.98971	1.66776	115.036	0.713872
2.44205e-05	8.28643e-08	9.92037	1.86581	114.338	0.683391
2.44205e-05	1.3895e-07	9.84436	2.08174	113.576	0.650893
2.44205e-05	2.32995e-07	9.76141	2.31606	112.747	0.616467
2.44205e-05	3.90694e-07	9.6713	2.5691	111.851	0.580226
2.44205e-05	6.55129e-07	9.57385	2.84102	110.886	0.54232
2.44205e-05	1.09854e-06	9.46895	3.13162	109.853	0.502939
2.44205e-05	1.84207e-06	9.35659	3.44064	108.752	0.462283
2.44205e-05	3.08884e-06	9.23686	3.76747	107.584	0.420582
2.44205e-05	5.17947e-06	9.10995	4.11124	106.352	0.378083
2.44205e-05	8.68511e-06	8.97599	4.47067	105.06	0.335051
2.44205e-05	1.45635e-05	8.83542	4.84447	103.712	0.291738
2.44205e-05	2.44205e-05	8.68889	5.23106	102.312	0.248408
2.44205e-05	4.09492e-05	8.53647	5.62808	100.869	0.205329
2.44205e-05	6.86649e-05	8.37905	6.03346	99.3892	0.162747
2.44205e-05	0.00011514	8.21733	6.44477	97.8809	0.120894
2.44205e-05	0.00019307	8.05211	6.85934	96.3531	0.0799908
2.44205e-05	0.000323746	7.88428	7.27427	94.8158	0.040242
2.44205e-05	0.000542868	7.71481	7.68652	93.2796	0.00183685
2.44205e-05	0.000910298	7.54466	8.09291	91.7559	-0.0350598
2.44205e-05	0.00152642	7.37492	8.49018	90.2564	-0.0702969
2.44205e-05	0.00255955	7.20667	8.87499	88.7934	-0.103741
2.44205e-05	0.00429193	7.04104	9.24399	87.3794	-0.135274
2.44205e-05	0.00719686	6.87916	9.59389	86.027	-0.164798
2.44205e-05	0.0120679	6.72218	9.92153	84.7485	-0.192226
2.44205e-05	0.0202359	6.57128	10.224	83.5558	-0.217484
2.44205e-05	0.0339322	6.42765	10.4986	82.4599	-0.24051
2.44205e-05	0.0568987	6.29256	10.7432	81.4705	-0.261252
2.44205e-05	0.0954095	6.16738	10.9562	80.5956	-0.279662
2.44205e-05	0.159986	6.05365	11.1369	79.841	-0.295699
2.44205e-05	0.26827	5.95299	11.2853	79.2094	-0.309328
2.44205e-05	0.449843	5.86704	11.4027	78.6998	-0.320542
2.44205e-05	0.754312	5.79687	11.4918	78.3058	-0.329402
2.44205e-05	1.26486	5.74263	11.5562	78.0155	-0.336069
2.44205e-05	2.12095	5.70308	11.6008	77.8116	-0.340833
2.44205e-05	3.55648	5.67563	11.6304	77.6749	-0.344086
2.44205e-05	5.96362	5.65766	11.6493	77.5863	-0.3462
2.44205e-05	10	5.64615	11.6612	77.5307	-0.347543
4.09492e-05	1e-10	11.4854	0.373423	118.582	0.937022
4.09492e-05	1.67683e-10	11.4666	0.42495	118.404	0.928529
4.09492e-05	2.81177e-10	11.4451	0.483566	118.201	0.918924
4.09492e-05	4.71487e-10	11.4206	0.550092	117.97	0.908093
4.09492e-05	7.90604e-10	11.3927	0.625329	117.71	0.895935
4.09492e-05	1.32571e-09	11.3612	0.710236	117.415	0.882328
4.09492e-05	2.223e-09	11.3255	0.805753	117.084	0.867161
4.09492e-05	3.72759e-09	11.2854	0.912852	116.712	0.850331
4.09492e-05	6.25055e-09	11.2403	1.03255	116.296	0.831735
4.09492e-05	1.04811e-08	11.19	1.16581	115.832	0.811294
4.09492e-05	1.75751e-08	11.1339	1.31364	115.318	0.78893
4.09492e-05	2.94705e-08	11.0716	1.477	114.749	0.764594
4.09492e-05	4.94171e-08	11.0027	1.65673	114.122	0.73826
4.09492e-05	8.28643e-08	10.9268	1.85365	113.434	0.709925
4.09492e-05	1.3895e-07	10.8436	2.06841	112.682	0.679615
4.09492e-05	2.32995e-07	10.7529	2.30151	111.866	0.647396
4.09492e-05	3.90694e-07	10.6542	2.55334	110.982	0.613351
4.09492e-05	6.55129e-07	10.5474	2.82399	110.031	0.577608
4.09492e-05	1.09854e-06	10.4325	3.11337	109.011	0.540321
4.09492e-05	1.84207e-06	10.3094	3.42119	107.924	0.501667
4.09492e-05	3.08884e-06	10.1781	3.74688	106.771	0.461849
4.09492e-05	5.17947e-06	10.0389	4.0895	105.554	0.421095
4.09492e-05	8.68511e-06	9.89189	4.44787	104.278	0.379645
4.09492e-05	1.45635e-05	9.73779	4.82095	102.945	0.337724
4.09492e-05	2.44205e-05	9.5766	5.20649	101.563	0.295615
4.09492e-05	4.09492e-05	9.40913	5.60279	100.137	0.253554
4.09492e-05	6.86649e-05	9.23606	6.00764	98.6734	0.211787
4.09492e-05	0.00011514	9.05817	6.41859	97.1815	0.170551
4.09492e-05	0.00019307	8.87635	6.83297	95.6699	0.130074
4.09492e-05	0.000323746	8.69154	7.24792	94.1483	0.0905692
4.09492e-05	0.000542868	8.50482	7.66038	92.6275	0.052238
4.09492e-05	0.000910298	8.31725	8.06724	91.1183	0.0152589
4.09492e-05	0.00152642	8.12999	8.46518	89.6328	-0.0201981
4.09492e-05	0.00255955	7.94427	8.85088	88.1829	-0.0539803
4.09492e-05	0.00429193	7.76126	9.22101	86.7811	-0.0859571
4.09492e-05	0.00719686	7.58226	9.57223	85.4399	-0.116003
4.09492e-05	0.0120679	7.40854	9.90138	84.1716	-0.144012
4.09492e-05	0.0202359	7.24136	10.2055	82.9882	-0.169893
4.09492e-05	0.0339322	7.08206	10.4818	81.9006	-0.193565
4.09492e-05	0.0568987	6.93205	10.7282	80.9187	-0.214953
4.09492e-05	0.0954095	6.79288	10.943	80.0506	-0.233994
4.09492e-05	0.159986	6.66623	11.1253	79.3022	-0.250627
4.09492e-05	0.26827	6.55399	11.2751	78.6763	-0.2648
4.09492e-05	0.449843	6.45799	11.3938	78.1716	-0.27649
4.09492e-05	0.754312	6.37952	11.4839	77.7819	-0.285744
4.09492e-05	1.26486	6.31879	11.5491	77.495	-0.292721
4.09492e-05	2.12095	6.27451	11.5942	77.2937	-0.29771
4.09492e-05	3.55648	6.24383	11.6241	77.1588	-0.301114
4.09492e-05	5.96362	6.22342	11.6433	77.0716	-0.303351
4.09492e-05	10	6.21052	11.6553	77.0168	-0.30476
6.86649e-05	1e-10	12.6353	0.370766	117.51	0.942986
6.86649e-05	1.67683e-10	12.6148	0.421877	117.334	0.935279
6.86649e-05	2.81177e-10	12.5914	0.480019	117.135	0.926554
6.86649e-05	4.71487e-10	12.5646	0.545996	116.909	0.91671
6.86649e-05	7.90604e-10	12.5343	0.620655	116.652	0.905639
6.86649e-05	1.32571e-09	12.4999	0.704883	116.363	0.893238
6.86649e-05	2.223e-09	12.461	0.79967	116.037	0.879392
6.86649e-05	3.72759e-09	12.4172	0.905976	115.672	0.864
6.86649e-05	6.25055e-09	12.368	1.02478	115.263	0.846966
6.86649e-05	1.04811e-08	12.313	1.15711	114.807	0.828196
6.86649e-05	1.75751e-08	12.2518	1.30391	114.301	0.807621
6.86649e-05	2.94705e-08	12.1837	1.46617	113.741	0.785175
6.86649e-05	4.94171e-08	12.1085	1.64476	113.123	0.76082
6.86649e-05	8.28643e-08	12.0257	1.84044	112.447	0.734541
6.86649e-05	1.3895e-07	11.9348	2.05393	111.707	0.706345
6.86649e-05	2.32995e-07	11.8355	2.28573	110.903	0.676271
6.86649e-05	3.90694e-07	11.7277	2.53619	110.033	0.644389
6.86649e-05	6.55129e-07	11.6109	2.80548	109.095	0.610794
6.86649e-05	1.09854e-06	11.4852	3.09351	108.091	0.575612
6.86649e-05	1.84207e-06	11.3504	3.39999	107.019	0.538998
6.86649e-05	3.08884e-06	11.2068	3.72439	105.882	0.501125
6.86649e-05	5.17947e-06	11.0543	4.06574	104.683	0.462205
6.86649e-05	8.68511e-06	10.8932	4.42298	103.424	0.422443
6.86649e-05	1.45635e-05	10.7242	4.79499	102.108	0.382058
6.86649e-05	2.44205e-05	10.5475	5.17961	100.744	0.341313
6.86649e-05	4.09492e-05	10.3637	5.57514	99.3355	0.300433
6.86649e-05	6.86649e-05	10.1737	5.97938	97.8903	0.259661
6.86649e-05	0.00011514	9.97832	6.3899	96.4162	0.219231
6.86649e-05	0.00019307	9.7785	6.80406	94.9222	0.179372
6.86649e-05	0.000323746	9.57532	7.21899	93.4179	0.140306
6.86649e-05	0.000542868	9.36986	7.63171	91.9136	0.102235
6.86649e-05	0.000910298	9.16337	8.03902	90.4205	0.0653603
6.86649e-05	0.00152642	8.9571	8.43768	88.9501	0.0298602
6.86649e-05	0.00255955	8.75235	8.82435	87.5145	-0.00409645
6.86649e-05	0.00429193	8.55051	9.19567	86.1259	-0.0363547
6.86649e-05	0.00719686	8.35286	9.54834	84.7969	-0.0667823
6.86649e-05	0.0120679	8.16088	9.87911	83.5398	-0.095246
6.86649e-05	0.0202359	7.97597	10.185	82.3665	-0.121635
6.86649e-05	0.0339322	7.79961	10.4632	81.288	-0.145849
6.86649e-05	0.0568987	7.63337	10.7116	80.3142	-0.167796
6.86649e-05	0.0954095	7.47893	10.9283	79.4534	-0.18739
6.86649e-05	0.159986	7.33824	11.1124	78.7117	-0.204553
6.86649e-05	0.26827	7.2134	11.2639	78.0917	-0.219214
6.86649e-05	0.449843	7.10648	11.3839	77.5924	-0.231334
6.86649e-05	0.754312	7.01899	11.4751	77.2072	-0.240947
6.86649e-05	1.26486	6.95119	11.5411	76.924	-0.248208
6.86649e-05	2.12095	6.90171	11.5868	76.7256	-0.253406
6.86649e-05	3.55648	6.86739	11.6171	76.5927	-0.256958
6.86649e-05	5.96362	6.84471	11.6366	76.5068	-0.259283
6.86649e-05	10	6.83014	11.6488	76.4529	-0.260763
0.00011514	1e-10	13.8877	0.367844	116.342	0.948393
0.00011514	1.67683e-10	13.8654	0.418499	116.17	0.941403
0.00011514	2.81177e-10	13.8398	0.476132	115.974	0.933482
0.00011514	4.71487e-10	13.8107	0.541522	115.752	0.924539
0.00011514	7.90604e-10	13.7777	0.615545	115.501	0.914467
0.00011514	1.32571e-09	13.7402	0.69908	115.217	0.903169
0.00011514	2.223e-09	13.6978	0.793078	114.897	0.890541
0.00011514	3.72759e-09	13.6501	0.898506	114.538	0.876482
0.00011514	6.25055e-09	13.5965	1.01637	114.137	0.860894
0.00011514	1.04811e-08	13.5366	1.14765	113.689	0.84369
0.00011514	1.75751e-08	13.4699	1.29336	113.192	0.824786
0.00011514	2.94705e-08	13.3957	1.45442	112.642	0.80412
0.00011514	4.94171e-08	13.3137	1.63174	112.036	0.78164
0.00011514	8.28643e-08	13.2233	1.82611	111.37	0.757319
0.00011514	1.3895e-07	13.1242	2.0382	110.644	0.731151
0.00011514	2.32995e-07	13.0159	2.26856	109.853	0.703154
0.00011514	3.90694e-07	12.8981	2.51756	108.997	0.673377
0.00011514	6.55129e-07	12.7707	2.78534	108.075	0.641896
0.00011514	1.09854e-06	12.6333	3.07189	107.086	0.608806
0.00011514	1.84207e-06	12.4861	3.3769	106.032	0.574242
0.00011514	3.08884e-06	12.3291	3.69987	104.913	0.538351
0.00011514	5.17947e-06	12.1623	4.03994	103.731	0.501313
0.00011514	8.68511e-06	11.9861	4.39582	102.491	0.463332
0.00011514	1.45635e-05	11.8011	4.76668	101.195	0.424585
0.00011514	2.44205e-05	11.6076	5.15023	99.8496	0.385333
0.00011514	4.09492e-05	11.4062	5.5449	98.4607	0.345779
0.00011514	6.86649e-05	11.198	5.94845	97.035	0.306158
0.00011514	0.00011514	10.9837	6.35849	95.5803	0.266702
0.00011514	0.00019307	10.7644	6.77238	94.1055	0.227639
0.00011514	0.000323746	10.5413	7.18729	92.6198	0.189188
0.00011514	0.000542868	10.3156	7.60023	91.1336	0.151564
0.00011514	0.000910298	10.0886	8.00803	89.6579	0.114972
0.00011514	0.00152642	9.86173	8.40746	88.204	0.0796025
0.00011514	0.00255955	9.63635	8.79516	86.7839	0.0456388
0.00011514	0.00429193	9.41399	9.16778	85.4098	0.0132498
0.00011514	0.00719686	9.19612	9.52199	84.0942	-0.017409
0.00011514	0.0120679	8.98432	9.85453	82.8492	-0.0461924
0.00011514	0.0202359	8.78014	10.1624	81.6867	-0.0729689
0.00011514	0.0339322	8.58523	10.4427	80.618	-0.0976174
0.00011514	0.0568987	8.4013	10.6931	79.6531	-0.120027
0.00011514	0.0954095	8.23029	10.912	78.8002	-0.140092
0.00011514	0.159986	8.07432	11.098	78.0656	-0.157712
0.00011514	0.26827	7.93578	11.2513	77.4521	-0.172801
0.00011514	0.449843	7.81701	11.3729	76.9584	-0.185302
0.00011514	0.754312	7.71973	11.4653	76.5781	-0.195234
0.00011514	1.26486	7.64426	11.5323	76.2988	-0.202748
0.00011514	2.12095	7.58915	11.5786	76.1033	-0.208133
0.00011514	3.55648	7.55089	11.6094	75.9726	-0.211818
0.00011514	5.96362	7.5256	11.6291	75.8882	-0.21423
0.00011514	10	7.50927	11.6415	75.8353	-0.215772
0.00019307	1e-10	15.249	0.364705	115.073	0.953284
0.00019307	1.67683e-10	15.2247	0.414868	114.904	0.946946
0.00019307	2.81177e-10	15.197	0.471946	114.713	0.93976
0.00019307	4.71487e-10	15.1653	0.536722	114.495	0.931637
0.00019307	7.90604e-10	15.1294	0.610049	114.249	0.922481
0.00019307	1.32571e-09	15.0886	0.692808	113.97	0.9122
0.00019307	2.223e-09	15.0426	0.785949	113.657	0.900692
0.00019307	3.72759e-09	14.9907	0.890436	113.306	0.887862
0.00019307	6.25055e-09	14.9324	1.00728	112.912	0.873614
0.00019307	1.04811e-08	14.8673	1.13743	112.473	0.857863
0.00019307	1.75751e-08	14.7946	1.28193	111.986	0.840522
0.00019307	2.94705e-08	14.7139	1.4417	111.447	0.821523
0.00019307	4.94171e-08	14.6247	1.61764	110.852	0.800812
0.00019307	8.28643e-08	14.5263	1.81056	110.2	0.778347
0.00019307	1.3895e-07	14.4183	2.02113	109.486	0.754112
0.00019307	2.32995e-07	14.3004	2.24992	108.71	0.728111
0.00019307	3.90694e-07	14.172	2.49731	107.87	0.700371
0.00019307	6.55129e-07	14.0331	2.76347	106.964	0.670948
0.00019307	1.09854e-06	13.8834	3.04837	105.993	0.639922
0.00019307	1.84207e-06	13.7227	3.35179	104.957	0.607393
0.00019307	3.08884e-06	13.5514	3.67319	103.857	0.573494
0.00019307	5.17947e-06	13.3693	4.01161	102.695	0.538387
0.00019307	8.68511e-06	13.1768	4.3662	101.475	0.50223
0.00019307	1.45635e-05	12.9747	4.73577	100.199	0.465202
0.00019307	2.44205e-05	12.7631	5.1182	98.875	0.427536
0.00019307	4.09492e-05	12.5429	5.5119	97.5071	0.389424
0.00019307	6.86649e-05	12.315	5.91465	96.1026	0.351094
0.00019307	0.00011514	12.0803	6.32414	94.6689	0.312759
0.00019307	0.00019307	11.8401	6.73768	93.2148	0.274652
0.00019307	0.000323746	11.5955	7.15257	91.7494	0.236981
0.00019307	0.000542868	11.348	7.5657	90.2829	0.199975
0.00019307	0.000910298	11.0988	7.97402	88.826	0.163834
0.00019307	0.00152642	10.8496	8.37424	87.3901	0.128764
0.00019307	0.00255955	10.6019	8.76305	85.9868	0.094956
0.00019307	0.00429193	10.3573	9.13706	84.6285	0.0625933
0.00019307	0.00719686	10.1175	9.49293	83.3272	0.0318479
0.00019307	0.0120679	9.88418	9.8274	82.0953	0.00288056
0.00019307	0.0202359	9.65905	10.1373	80.9448	-0.0241605
0.00019307	0.0339322	9.44397	10.4199	79.8868	-0.0491322
0.00019307	0.0568987	9.24085	10.6727	78.9313	-0.0719046
0.00019307	0.0954095	9.05181	10.8938	78.087	-0.0923525
0.00019307	0.159986	8.87926	11.0821	77.36	-0.110356
0.00019307	0.26827	8.72586	11.2374	76.7533	-0.125808
0.00019307	0.449843	8.59421	11.3607	76.2657	-0.138635
0.00019307	0.754312	8.48631	11.4544	75.8905	-0.148845
0.00019307	1.26486	8.40255	11.5224	75.6154	-0.156579
0.00019307	2.12095	8.34132	11.5694	75.4231	-0.162129
0.00019307	3.55648	8.29882	11.6007	75.2946	-0.165927
0.00019307	5.96362	8.27071	11.6207	75.2118	-0.168416
0.00019307	10	8.25257	11.6333	75.1599	-0.170006
0.000323746	1e-10	16.7255	0.361344	113.696	0.957705
0.000323746	1.67683e-10	16.6992	0.41098	113.531	0.951961
0.000323746	2.81177e-10	16.6691	0.467459	113.344	0.945443
0.000323746	4.71487e-10	16.6348	0.531544	113.131	0.938071
0.000323746	7.90604e-10	16.5958	0.604114	112.89	0.929754
0.000323746	1.32571e-09	16.5516	0.68604	112.618	0.920402
0.000323746	2.223e-09	16.5016	0.778249	112.312	0.909924
0.000323746	3.72759e-09	16.4453	0.881722	111.968	0.898226
0.000323746	6.25055e-09	16.3821	0.997426	111.583	0.885218
0.000323746	1.04811e-08	16.3114	1.12639	111.154	0.87081
0.000323746	1.75751e-08	16.2325	1.26957	110.677	0.854923
0.000323746	2.94705e-08	16.1449	1.42793	110.149	0.837484
0.000323746	4.94171e-08	16.0479	1.60238	109.567	0.81843
0.000323746	8.28643e-08	15.941	1.79371	108.928	0.797717
0.000323746	1.3895e-07	15.8236	2.00264	108.23	0.775316
0.000323746	2.32995e-07	15.6953	2.22972	107.469	0.751218
0.000323746	3.90694e-07	15.5558	2.47537	106.646	0.725434
0.000323746	6.55129e-07	15.4046	2.73974	105.758	0.698006
0.000323746	1.09854e-06	15.2416	3.02287	104.805	0.668989
0.000323746	1.84207e-06	15.0667	3.32451	103.789	0.638468
0.000323746	3.08884e-06	14.88	3.64418	102.709	0.606549
0.000323746	5.17947e-06	14.6815	3.98097	101.568	0.573373
0.000323746	8.68511e-06	14.4717	4.33402	100.37	0.539075
0.000323746	1.45635e-05	14.2512	4.70213	99.1163	0.503821
0.000323746	2.44205e-05	14.0203	5.08329	97.8148	0.467818
0.000323746	4.09492e-05	13.7798	5.47587	96.4699	0.431247
0.000323746	6.86649e-05	13.5308	5.87775	95.0882	0.394314
0.000323746	0.00011514	13.2743	6.28658	93.6772	0.35723
0.000323746	0.00019307	13.0116	6.69978	92.2454	0.32021
0.000323746	0.000323746	12.7439	7.11452	90.802	0.283475
0.000323746	0.000542868	12.4727	7.52787	89.3568	0.247236
0.000323746	0.000910298	12.1997	7.93671	87.9203	0.211704
0.000323746	0.00152642	11.9264	8.33778	86.5038	0.177091
0.000323746	0.00255955	11.6545	8.72775	85.1189	0.143595
0.000323746	0.00429193	11.3859	9.10325	83.7776	0.111409
0.000323746	0.00719686	11.1224	9.46092	82.492	0.0807194
0.000323746	0.0120679	10.8658	9.79745	81.2744	0.0517013
0.000323746	0.0202359	10.618	10.1097	80.1367	0.0245221
0.000323746	0.0339322	10.381	10.3947	79.0902	-0.000660267
0.000323746	0.0568987	10.1571	10.6501	78.145	-0.0236944
0.000323746	0.0954095	9.94849	10.8737	77.3098	-0.044435
0.000323746	0.159986	9.75795	11.0644	76.5909	-0.0627429
0.000323746	0.26827	9.58843	11.2218	75.9915	-0.0784908
0.000323746	0.449843	9.44285	11.347	75.5103	-0.0915888
0.000323746	0.754312	9.32345	11.4422	75.1406	-0.102031
0.000323746	1.26486	9.23072	11.5113	74.8699	-0.10995
0.000323746	2.12095	9.16289	11.5592	74.6809	-0.11564
0.000323746	3.55648	9.11579	11.591	74.5549	-0.119536
0.000323746	5.96362	9.08463	11.6114	74.4736	-0.12209
0.000323746	10	9.06453	11.6242	74.4228	-0.123722
0.000542868	1e-10	18.3236	0.357688	112.205	0.961706
0.000542868	1.67683e-10	18.2951	0.406751	112.045	0.956501
0.000542868	2.81177e-10	18.2625	0.462604	111.862	0.95059
0.000542868	4.71487e-10	18.2254	0.525963	111.655	0.943901
0.000542868	7.90604e-10	18.1832	0.59772	111.42	0.936348
0.000542868	1.32571e-09	18.1353	0.678739	111.154	0.927848
0.000542868	2.223e-09	18.0812	0.769951	110.855	0.918313
0.000542868	3.72759e-09	18.0202	0.872311	110.52	0.907656
0.000542868	6.25055e-09	17.9518	0.986814	110.144	0.895788
0.000542868	1.04811e-08	17.8751	1.11446	109.725	0.882624
0.000542868	1.75751e-08	17.7896	1.25623	109.259	0.868084
0.000542868	2.94705e-08	17.6946	1.41307	108.744	0.852095
0.000542868	4.94171e-08	17.5895	1.58589	108.175	0.834591
0.000542868	8.28643e-08	17.4735	1.77552	107.551	0.815521
0.000542868	1.3895e-07	17.3462	1.98265	106.868	0.794851
0.000542868	2.32995e-07	17.207	2.20789	106.124	0.772558
0.000542868	3.90694e-07	17.0555	2.4516	105.319	0.748646
0.000542868	6.55129e-07	16.8913	2.71407	104.45	0.72313
0.000542868	1.09854e-06	16.7143	2.99524	103.517	0.696061
0.000542868	1.84207e-06	16.5242	3.29494	102.522	0.667499
0.000542868	3.08884e-06	16.3212	3.61273	101.464	0.637529
0.000542868	5.17947e-06	16.1053	3.94771	100.346	0.606272
0.000542868	8.68511e-06	15.877	4.29902	99.1709	0.573848
0.000542868	1.45635e-05	15.6369	4.66555	97.9413	0.540394
0.000542868	2.44205e-05	15.3853	5.04529	96.6641	0.506103
0.000542868	4.09492e-05	15.1232	5.43664	95.3438	0.47114
0.000542868	6.86649e-05	14.8516	5.83754	93.9867	0.43569
0.000542868	0.00011514	14.5717	6.24564	92.6002	0.399957
0.000542868	0.00019307	14.2848	6.65836	91.1926	0.364148
0.000542868	0.000323746	13.9923	7.07296	89.7729	0.328472
0.000542868	0.000542868	13.6959	7.48649	88.3506	0.293139
0.000542868	0.000910298	13.3971	7.89585	86.9363	0.258361
0.000542868	0.00152642	13.0979	8.29778	85.5409	0.22435
0.000542868	0.00255955	12.8001	8.68898	84.1758	0.19131
0.000542868	0.00429193	12.5056	9.06606	82.8529	0.159445
0.000542868	0.00719686	12.2164	9.42565	81.5843	0.128949
0.000542868	0.0120679	11.9346	9.76441	80.3822	0.100011
0.000542868	0.0202359	11.6622	10.0791	79.2584	0.0728146
0.000542868	0.0339322	11.4016	10.3669	78.2242	0.0475349
0.000542868	0.0568987	11.1551	10.625	77.29	0.0243408
0.000542868	0.0954095	10.9254	10.8514	76.4646	0.00339753
0.000542868	0.159986	10.7153	11.0447	75.7545	-0.0151359
0.000542868	0.26827	10.5284	11.2045	75.1628	-0.0311124
0.000542868	0.449843	10.3677	11.3317	74.6883	-0.0444242
0.000542868	0.754312	10.2359	11.4286	74.3244	-0.0550526
0.000542868	1.26486	10.1335	11.499	74.0583	-0.0631223
0.000542868	2.12095	10.0585	11.5477	73.873	-0.0689255
0.000542868	3.55648	10.0064	11.5801	73.7492	-0.0729015
0.000542868	5.96362	9.97199	11.6009	73.6697	-0.0755088
0.000542868	10	9.94981	11.614	73.62	-0.0771735
0.000910298	1e-10	20.0487	0.353797	110.596	0.965318
0.000910298	1.67683e-10	20.018	0.402237	110.44	0.960604
0.000910298	2.81177e-10	19.9828	0.457373	110.262	0.955248
0.000910298	4.71487e-10	19.9427	0.519979	110.06	0.949178
0.000910298	7.90604e-10	19.8971	0.590847	109.832	0.942323
0.000910298	1.32571e-09	19.8454	0.670891	109.573	0.934599
0.000910298	2.223e-09	19.787	0.761033	109.282	0.925926
0.000910298	3.72759e-09	19.7211	0.862195	108.955	0.916224
0.000910298	6.25055e-09	19.6471	0.975395	108.59	0.905405
0.000910298	1.04811e-08	19.5643	1.10162	108.181	0.893388
0.000910298	1.75751e-08	19.4718	1.24185	107.728	0.880094
0.000910298	2.94705e-08	19.3691	1.39705	107.225	0.86545
0.000910298	4.94171e-08	19.2554	1.56811	106.671	0.84939
0.000910298	8.28643e-08	19.1299	1.75589	106.062	0.831858
0.000910298	1.3895e-07	18.9921	1.96108	105.395	0.812813
0.000910298	2.32995e-07	18.8414	2.18429	104.67	0.792227
0.000910298	3.90694e-07	18.6772	2.42595	103.883	0.770087
0.000910298	6.55129e-07	18.4993	2.68628	103.035	0.746405
0.000910298	1.09854e-06	18.3073	2.96534	102.124	0.721206
0.000910298	1.84207e-06	18.1012	3.26292	101.151	0.694542
0.000910298	3.08884e-06	17.8809	3.57863	100.116	0.666476
0.000910298	5.17947e-06	17.6465	3.91161	99.0231	0.637111
0.000910298	8.68511e-06	17.3985	4.26108	97.873	0.60654
0.000910298	1.45635e-05	17.1376	4.62583	96.6692	0.574898
0.000910298	2.44205e-05	16.864	5.00401	95.4181	0.542343
0.000910298	4.09492e-05	16.5788	5.394	94.1241	0.50903
0.000910298	6.86649e-05	16.2832	5.79379	92.7935	0.475129
0.000910298	0.00011514	15.9784	6.20095	91.4335	0.440836
0.000910298	0.00019307	15.6657	6.61316	90.0519	0.406328
0.000910298	0.000323746	15.3466	7.02757	88.6576	0.371815
0.000910298	0.000542868	15.0231	7.44123	87.2602	0.337507
0.000910298	0.000910298	14.6968	7.85109	85.8697	0.303609
0.000910298	0.00152642	14.3698	8.25393	84.497	0.270331
0.000910298	0.00255955	14.044	8.64643	83.1533	0.237879
0.000910298	0.00429193	13.7216	9.0252	81.8504	0.206466
0.000910298	0.00719686	13.4048	9.38684	80.6001	0.176293
0.000910298	0.0120679	13.0959	9.72798	79.4147	0.14756
0.000910298	0.0202359	12.7971	10.0454	78.3058	0.120464
0.000910298	0.0339322	12.5109	10.336	77.285	0.0951944
0.000910298	0.0568987	12.24	10.5972	76.3626	0.0719395
0.000910298	0.0954095	11.9874	10.8266	75.5477	0.0508827
0.000910298	0.159986	11.7563	11.0228	74.8468	0.0322025
0.000910298	0.26827	11.5505	11.1852	74.2633	0.0160652
0.000910298	0.449843	11.3736	11.3147	73.796	0.00259526
0.000910298	0.754312	11.2283	11.4134	73.438	-0.008173
0.000910298	1.26486	11.1154	11.4851	73.1768	-0.0163586
0.000910298	2.12095	11.0328	11.5349	72.9951	-0.0222493
0.000910298	3.55648	10.9754	11.568	72.8741	-0.0262868
0.000910298	5.96362	10.9374	11.5892	72.7964	-0.0289351
0.000910298	10	10.9132	11.6025	72.7477	-0.0306163
0.00152642	1e-10	21.9061	0.349611	108.864	0.968582
0.00152642	1.67683e-10	21.873	0.397386	108.713	0.964313
0.00152642	2.81177e-10	21.8351	0.451779	108.54	0.959458
0.00152642	4.71487e-10	21.7919	0.513544	108.344	0.953953
0.00152642	7.90604e-10	21.7428	0.583481	108.122	0.947731
0.00152642	1.32571e-09	21.6871	0.662475	107.871	0.940717
0.00152642	2.223e-09	21.6241	0.751439	107.588	0.932834
0.00152642	3.72759e-09	21.5531	0.851334	107.271	0.924003
0.00152642	6.25055e-09	21.4733	0.963133	106.915	0.914146
0.00152642	1.04811e-08	21.384	1.08782	106.518	0.903184
0.00152642	1.75751e-08	21.2843	1.2264	106.077	0.891039
0.00152642	2.94705e-08	21.1735	1.37981	105.589	0.87764
0.00152642	4.94171e-08	21.0507	1.54899	105.049	0.862919
0.00152642	8.28643e-08	20.9153	1.73476	104.457	0.846821
0.00152642	1.3895e-07	20.7664	1.93784	103.808	0.829297
0.00152642	2.32995e-07	20.6036	2.15887	103.102	0.810313
0.00152642	3.90694e-07	20.4262	2.39828	102.336	0.78985
0.00152642	6.55129e-07	20.2338	2.6563	101.509	0.767908
0.00152642	1.09854e-06	20.0261	2.93306	100.621	0.744498
0.00152642	1.84207e-06	19.803	3.22835	99.6717	0.719656
0.00152642	3.08884e-06	19.5644	3.54179	98.6623	0.693434
0.00152642	5.17947e-06	19.3106	3.87257	97.5951	0.665916
0.00152642	8.68511e-06	19.0418	4.21996	96.4718	0.637176
0.00152642	1.45635e-05	18.7587	4.58279	95.2955	0.607327
0.00152642	2.44205e-05	18.4619	4.95924	94.0724	0.576515
0.00152642	4.09492e-05	18.1523	5.34771	92.8066	0.544875
0.00152642	6.86649e-05	17.8312	5.74615	91.5045	0.512571
0.00152642	0.00011514	17.4999	6.15237	90.1728	0.479765
0.00152642	0.00019307	17.1597	6.5639	88.8192	0.446636
0.00152642	0.000323746	16.8125	6.978	87.4523	0.41338
0.00152642	0.000542868	16.4601	7.39176	86.0815	0.380194
0.00152642	0.000910298	16.1043	7.80219	84.7165	0.347273
0.00152642	0.00152642	15.7474	8.20594	83.3683	0.314841
0.00152642	0.00255955	15.3918	8.59978	82.0477	0.283099
0.00152642	0.00429193	15.0395	8.98032	80.7662	0.252257
0.00152642	0.00719686	14.693	9.34415	79.5357	0.222525
0.00152642	0.0120679	14.3549	9.68786	78.3682	0.194113
0.00152642	0.0202359	14.0276	10.0082	77.2755	0.167227
0.00152642	0.0339322	13.7139	10.3019	76.269	0.142072
0.00152642	0.0568987	13.4167	10.5663	75.3593	0.118851
0.00152642	0.0954095	13.1394	10.799	74.5555	0.0977665
0.00152642	0.159986	12.8856	10.9984	73.8644	0.0790157
0.00152642	0.26827	12.6594	11.1637	73.2894	0.062783
0.00152642	0.449843	12.465	11.2957	72.8296	0.0492111
0.00152642	0.754312	12.3052	11.3964	72.478	0.0383459
0.00152642	1.26486	12.1811	11.4697	72.2219	0.0300794
0.00152642	2.12095	12.0902	11.5206	72.044	0.0241256
0.00152642	3.55648	12.027	11.5544	71.9257	0.0200435
0.00152642	5.96362	11.9853	11.5761	71.8498	0.0173648
0.00152642	10	11.9586	11.5897	71.8023	0.0156636
0.00255955	1e-10	23.8996	0.345128	107.005	0.97153
0.00255955	1.67683e-10	23.864	0.392209	106.858	0.967661
0.00255955	2.81177e-10	23.8233	0.445801	106.691	0.963262
0.00255955	4.71487e-10	23.7769	0.506666	106.501	0.958271
0.00255955	7.90604e-10	23.7242	0.575589	106.286	0.952626
0.00255955	1.32571e-09	23.6643	0.65347	106.043	0.946256
0.00255955	2.223e-09	23.5966	0.741189	105.769	0.939092
0.00255955	3.72759e-09	23.5203	0.8397	105.461	0.931059
0.00255955	6.25055e-09	23.4345	0.949994	105.117	0.922082
0.00255955	1.04811e-08	23.3385	1.07304	104.732	0.912088
0.00255955	1.75751e-08	23.2312	1.20983	104.304	0.901
0.00255955	2.94705e-08	23.112	1.36133	103.83	0.88875
0.00255955	4.94171e-08	22.9798	1.52846	103.307	0.875269
0.00255955	8.28643e-08	22.8339	1.71207	102.732	0.860501
0.00255955	1.3895e-07	22.6736	1.91288	102.102	0.844396
0.00255955	2.32995e-07	22.4981	2.13154	101.416	0.826913
0.00255955	3.90694e-07	22.3068	2.36851	100.672	0.808026
0.00255955	6.55129e-07	22.0993	2.62405	99.8678	0.787727
0.00255955	1.09854e-06	21.8752	2.89829	99.004	0.766017
0.00255955	1.84207e-06	21.6343	3.19107	98.0804	0.742918
0.00255955	3.08884e-06	21.3766	3.50205	97.0977	0.718469
0.00255955	5.17947e-06	21.1022	3.83044	96.0581	0.692737
0.00255955	8.68511e-06	20.8115	4.17552	94.9635	0.665785
0.00255955	1.45635e-05	20.5051	4.53628	93.8164	0.637698
0.00255955	2.44205e-05	20.1838	4.91075	92.6231	0.60862
0.00255955	4.09492e-05	19.8484	5.29752	91.3875	0.578657
0.00255955	6.86649e-05	19.5003	5.69458	90.1156	0.547957
0.00255955	0.00011514	19.1409	6.09965	88.8142	0.516678
0.00255955	0.00019307	18.7717	6.51042	87.4905	0.484977
0.00255955	0.000323746	18.3945	6.92414	86.153	0.45304
0.00255955	0.000542868	18.0113	7.33792	84.8107	0.421054
0.00255955	0.000910298	17.6244	7.74875	83.4734	0.389216
0.00255955	0.00152642	17.2358	8.15348	82.1513	0.357722
0.00255955	0.00255955	16.8481	8.54873	80.8555	0.326787
0.00255955	0.00429193	16.4639	8.93112	79.5971	0.296623
0.00255955	0.00719686	16.0857	9.29725	78.3879	0.26744
0.00255955	0.0120679	15.7162	9.64369	77.2397	0.239454
0.00255955	0.0202359	15.3583	9.96707	76.1643	0.21288
0.00255955	0.0339322	15.015	10.2642	75.1731	0.187935
0.00255955	0.0568987	14.6896	10.5321	74.277	0.164836
0.00255955	0.0954095	14.3857	10.7684	73.485	0.143805
0.00255955	0.159986	14.1075	10.9713	72.8042	0.125055
0.00255955	0.26827	13.8594	11.1398	72.2383	0.10879
0.00255955	0.449843	13.6461	11.2744	71.7862	0.0951671
0.00255955	0.754312	13.4708	11.3774	71.4412	0.0842488
0.00255955	1.26486	13.3346	11.4524	71.1903	0.0759341
0.00255955	2.12095	13.2348	11.5045	71.0163	0.0699412
0.00255955	3.55648	13.1655	11.5391	70.901	0.0658314
0.00255955	5.96362	13.1196	11.5614	70.827	0.063134
0.00255955	10	13.0903	11.5753	70.7807	0.0614202
0.00429193	1e-10	26.0318	0.340375	105.016	0.974187
0.00429193	1.67683e-10	25.9937	0.386697	104.874	0.970683
0.00429193	2.81177e-10	25.9502	0.439435	104.713	0.966696
0.00429193	4.71487e-10	25.9004	0.499331	104.529	0.962172
0.00429193	7.90604e-10	25.8439	0.567188	104.322	0.957049
0.00429193	1.32571e-09	25.7798	0.643857	104.087	0.951267
0.00429193	2.223e-09	25.7072	0.730249	103.822	0.944757
0.00429193	3.72759e-09	25.6254	0.827285	103.525	0.937452
0.00429193	6.25055e-09	25.5335	0.93596	103.192	0.92928
0.00429193	1.04811e-08	25.4304	1.05724	102.82	0.920171
0.00429193	1.75751e-08	25.3154	1.19213	102.406	0.910054
0.00429193	2.94705e-08	25.1874	1.34157	101.948	0.89886
0.00429193	4.94171e-08	25.0455	1.5065	101.442	0.886525
0.00429193	8.28643e-08	24.8889	1.68777	100.885	0.872988
0.00429193	1.3895e-07	24.7166	1.88614	100.275	0.8582
0.00429193	2.32995e-07	24.528	2.10222	99.6102	0.842118
0.00429193	3.90694e-07	24.3223	2.33656	98.8885	0.824707
0.00429193	6.55129e-07	24.0991	2.58941	98.1089	0.805953
0.00429193	1.09854e-06	23.8578	2.86093	97.2708	0.785848
0.00429193	1.84207e-06	23.5984	3.15098	96.3742	0.764407
0.00429193	3.08884e-06	23.3207	3.45928	95.4197	0.741651
0.00429193	5.17947e-06	23.0248	3.78509	94.4094	0.717635
0.00429193	8.68511e-06	22.7112	4.12767	93.345	0.692411
0.00429193	1.45635e-05	22.3805	4.48606	92.2292	0.666049
0.00429193	2.44205e-05	22.0333	4.85842	91.0675	0.638668
0.00429193	4.09492e-05	21.6708	5.2433	89.864	0.610368
0.00429193	6.86649e-05	21.2943	5.63875	88.6244	0.581277
0.00429193	0.00011514	20.9052	6.04264	87.3549	0.551531
0.00429193	0.00019307	20.5055	6.45241	86.0633	0.521297
0.00429193	0.000323746	20.0966	6.86563	84.7571	0.490722
0.00429193	0.000542868	19.6809	7.27943	83.4453	0.459989
0.00429193	0.000910298	19.2609	7.69063	82.1375	0.429298
0.00429193	0.00152642	18.8386	8.09627	80.8435	0.398826
0.00429193	0.00255955	18.4171	8.49292	79.5742	0.368791
0.00429193	0.00429193	17.9988	8.87725	78.3405	0.339394
0.00429193	0.00719686	17.5869	9.2458	77.154	0.310855
0.00429193	0.0120679	17.1838	9.59514	76.0266	0.283383
0.00429193	0.0202359	16.7932	9.92181	74.9697	0.257212
0.00429193	0.0339322	16.4183	10.2226	73.9949	0.232565
0.00429193	0.0568987	16.0626	10.4943	73.1131	0.209672
0.00429193	0.0954095	15.7302	10.7345	72.3336	0.188767
0.00429193	0.159986	15.4257	10.9411	71.6638	0.170084
0.00429193	0.26827	15.1541	11.113	71.1074	0.153843
0.00429193	0.449843	14.9204	11.2507	70.6634	0.140219
0.00429193	0.754312	14.7286	11.3562	70.3249	0.129287
0.00429193	1.26486	14.5793	11.433	70.0796	0.120954
0.00429193	2.12095	14.47	11.4865	69.9098	0.114944
0.00429193	3.55648	14.3941	11.522	69.7974	0.110822
0.00429193	5.96362	14.3439	11.5449	69.7253	0.108115
0.00429193	10	14.3118	11.5592	69.6803	0.106396
0.00719686	1e-10	28.3032	0.335322	102.897	0.976583
0.00719686	1.67683e-10	28.2625	0.380843	102.761	0.973408
0.00719686	2.81177e-10	28.216	0.432672	102.605	0.969795
0.00719686	4.71487e-10	28.1629	0.491547	102.429	0.965691
0.00719686	7.90604e-10	28.1025	0.558256	102.229	0.961044
0.00719686	1.32571e-09	28.034	0.633648	102.002	0.955794
0.00719686	2.223e-09	27.9565	0.718613	101.748	0.949879
0.00719686	3.72759e-09	27.8691	0.814079	101.461	0.943237
0.00719686	6.25055e-09	27.7708	0.921027	101.14	0.935799
0.00719686	1.04811e-08	27.6607	1.04042	100.782	0.927499
0.00719686	1.75751e-08	27.5376	1.17326	100.383	0.91827
0.00719686	2.94705e-08	27.4007	1.32051	99.9405	0.908046
0.00719686	4.94171e-08	27.2488	1.48309	99.4519	0.896764
0.00719686	8.28643e-08	27.0811	1.66185	98.9143	0.884364
0.00719686	1.3895e-07	26.8966	1.85759	98.3253	0.870795
0.00719686	2.32995e-07	26.6944	2.07094	97.6829	0.856011
0.00719686	3.90694e-07	26.4738	2.30243	96.9852	0.839977
0.00719686	6.55129e-07	26.2343	2.55237	96.2312	0.82267
0.00719686	1.09854e-06	25.9754	2.82092	95.4201	0.804077
0.00719686	1.84207e-06	25.6967	3.10804	94.5519	0.784199
0.00719686	3.08884e-06	25.3983	3.4134	93.6272	0.763054
0.00719686	5.17947e-06	25.0802	3.73638	92.6479	0.740678
0.00719686	8.68511e-06	24.7427	4.07624	91.6155	0.717115
0.00719686	1.45635e-05	24.3866	4.43206	90.5325	0.692418
0.00719686	2.44205e-05	24.0126	4.80207	89.4043	0.666693
0.00719686	4.09492e-05	23.6218	5.18483	88.2348	0.640025
0.00719686	6.86649e-05	23.2155	5.57852	87.0293	0.612522
0.00719686	0.00011514	22.7956	5.98088	85.7942	0.584321
0.00719686	0.00019307	22.3633	6.38973	84.5362	0.555544
0.00719686	0.000323746	21.9214	6.80226	83.2634	0.526365
0.00719686	0.000542868	21.4716	7.21585	81.984	0.496933
0.00719686	0.000910298	21.0163	7.62752	80.7075	0.467423
0.00719686	0.00152642	20.5587	8.034	79.4435	0.438038
0.00719686	0.00255955	20.1013	8.43207	78.2024	0.408968
0.00719686	0.00429193	19.6471	8.81838	76.9952	0.380416
0.00719686	0.00719686	19.1991	9.18948	75.833	0.352594
0.00719686	0.0120679	18.7606	9.54186	74.7276	0.325723
0.00719686	0.0202359	18.3352	9.87204	73.6905	0.300034
0.00719686	0.0339322	17.9264	10.1767	72.7332	0.275761
0.00719686	0.0568987	17.5381	10.4525	71.8668	0.253142
0.00719686	0.0954095	17.1753	10.6969	71.1005	0.232433
0.00719686	0.159986	16.8427	10.9075	70.442	0.213876
0.00719686	0.26827	16.5459	11.0833	69.8954	0.197712
0.00719686	0.449843	16.2906	11.2243	69.4597	0.18413
0.00719686	0.754312	16.0808	11.3324	69.1284	0.173217
0.00719686	1.26486	15.9178	11.4113	68.8884	0.164895
0.00719686	2.12095	15.7983	11.4663	68.7228	0.158888
0.00719686	3.55648	15.7154	11.5029	68.6133	0.154767
0.00719686	5.96362	15.6605	11.5264	68.5432	0.152061
0.00719686	10	15.6254	11.5412	68.4995	0.15034
0.0120679	1e-10	30.711	0.329991	100.652	0.978738
0.0120679	1.67683e-10	30.6677	0.374663	100.52	0.975861
0.0120679	2.81177e-10	30.6181	0.42553	100.371	0.972585
0.0120679	4.71487e-10	30.5616	0.48332	100.202	0.968863
0.0120679	7.90604e-10	30.4974	0.548814	100.009	0.964645
0.0120679	1.32571e-09	30.4244	0.622843	99.7922	0.959878
0.0120679	2.223e-09	30.3419	0.706299	99.5474	0.954503
0.0120679	3.72759e-09	30.2488	0.800101	99.2722	0.948462
0.0120679	6.25055e-09	30.1441	0.90522	98.9637	0.941691
0.0120679	1.04811e-08	30.0267	1.02261	98.6192	0.93413
0.0120679	1.75751e-08	29.8955	1.15327	98.2357	0.925713
0.0120679	2.94705e-08	29.7494	1.29817	97.8102	0.916376
0.0120679	4.94171e-08	29.5874	1.45823	97.34	0.906059
0.0120679	8.28643e-08	29.4084	1.63432	96.8225	0.894705
0.0120679	1.3895e-07	29.2114	1.82723	96.2553	0.88226
0.0120679	2.32995e-07	28.9954	2.03764	95.6362	0.868679
0.0120679	3.90694e-07	28.7596	2.26609	94.9636	0.853921
0.0120679	6.55129e-07	28.5034	2.5129	94.2363	0.837963
0.0120679	1.09854e-06	28.2263	2.77829	93.4535	0.820782
0.0120679	1.84207e-06	27.9279	3.0622	92.6151	0.802376
0.0120679	3.08884e-06	27.6081	3.36442	91.7216	0.782748
0.0120679	5.17947e-06	27.2671	3.6843	90.7747	0.76193
0.0120679	8.68511e-06	26.9051	4.02117	89.776	0.739951
0.0120679	1.45635e-05	26.5227	4.3742	88.7275	0.716851
0.0120679	2.44205e-05	26.1208	4.74162	87.6346	0.692725
0.0120679	4.09492e-05	25.7007	5.12206	86.5008	0.667644
0.0120679	6.86649e-05	25.2635	5.51374	85.3313	0.6417
0.0120679	0.00011514	24.8112	5.91449	84.1322	0.615013
0.0120679	0.00019307	24.3456	6.32201	82.9101	0.587708
0.0120679	0.000323746	23.8688	6.73385	81.6724	0.559917
0.0120679	0.000542868	23.383	7.14725	80.4274	0.531791
0.0120679	0.000910298	22.8913	7.55913	79.1841	0.503512
0.0120679	0.00152642	22.3963	7.96645	77.9519	0.475248
0.0120679	0.00255955	21.9011	8.36598	76.7409	0.44719
0.0120679	0.00429193	21.409	8.75431	75.5616	0.419539
0.0120679	0.00719686	20.9232	9.12801	74.4253	0.392503
0.0120679	0.0120679	20.4471	9.48357	73.3434	0.366297
0.0120679	0.0202359	19.9846	9.81744	72.3273	0.341157
0.0120679	0.0339322	19.5399	10.1262	71.3886	0.317324
0.0120679	0.0568987	19.1173	10.4064	70.5381	0.295048
0.0120679	0.0954095	18.7219	10.6553	69.7859	0.274588
0.0120679	0.159986	18.3593	10.8703	69.1393	0.256211
0.0120679	0.26827	18.0357	11.0502	68.6027	0.240168
0.0120679	0.449843	17.7572	11.1948	68.1757	0.226666
0.0120679	0.754312	17.5285	11.3059	67.8514	0.215806
0.0120679	1.26486	17.3507	11.3871	67.617	0.207519
0.0120679	2.12095	17.2204	11.4437	67.4556	0.201529
0.0120679	3.55648	17.1299	11.4814	67.349	0.197421
0.0120679	5.96362	17.0701	11.5057	67.281	0.194723
0.0120679	10	17.0318	11.5209	67.2385	0.193009
0.0202359	1e-10	33.2475	0.324397	98.2855	0.980675
0.0202359	1.67683e-10	33.2016	0.368196	98.1599	0.978064
0.0202359	2.81177e-10	33.1491	0.418029	98.0171	0.975093
0.0202359	4.71487e-10	33.0892	0.474677	97.8547	0.971715
0.0202359	7.90604e-10	33.021	0.538889	97.6708	0.967885
0.0202359	1.32571e-09	32.9436	0.611493	97.4628	0.963553
0.0202359	2.223e-09	32.8561	0.693347	97.2284	0.958667
0.0202359	3.72759e-09	32.7572	0.785386	96.9648	0.953171
0.0202359	6.25055e-09	32.6461	0.888565	96.6692	0.947006
0.0202359	1.04811e-08	32.5214	1.00383	96.3391	0.940115
0.0202359	1.75751e-08	32.382	1.13218	95.9714	0.932436
0.0202359	2.94705e-08	32.2268	1.27459	95.5634	0.923908
0.0202359	4.94171e-08	32.0546	1.43198	95.1123	0.914474
0.0202359	8.28643e-08	31.8642	1.60524	94.6155	0.904077
0.0202359	1.3895e-07	31.6544	1.79516	94.0708	0.892665
0.0202359	2.32995e-07	31.4244	2.00243	93.476	0.880191
0.0202359	3.90694e-07	31.1733	2.22761	92.8294	0.866614
0.0202359	6.55129e-07	30.9002	2.47108	92.1298	0.851904
0.0202359	1.09854e-06	30.6046	2.73305	91.3764	0.836038
0.0202359	1.84207e-06	30.2862	3.01354	90.569	0.819005
0.0202359	3.08884e-06	29.9446	3.31236	89.708	0.800802
0.0202359	5.17947e-06	29.5801	3.62891	88.7948	0.78145
0.0202359	8.68511e-06	29.1929	3.96276	87.8304	0.76096
0.0202359	1.45635e-05	28.7836	4.31253	86.8187	0.739394
0.0202359	2.44205e-05	28.3532	4.67711	85.7627	0.716799
0.0202359	4.09492e-05	27.9028	5.055	84.6663	0.693244
0.0202359	6.86649e-05	27.4339	5.44443	83.5346	0.668814
0.0202359	0.00011514	26.9482	5.84338	82.3731	0.643604
0.0202359	0.00019307	26.448	6.24945	81.1886	0.61774
0.0202359	0.000323746	25.9351	6.66035	79.9879	0.591333
0.0202359	0.000542868	25.4124	7.07328	78.7791	0.564529
0.0202359	0.000910298	24.8823	7.4854	77.5707	0.537477
0.0202359	0.00152642	24.3485	7.8935	76.372	0.510359
0.0202359	0.00255955	23.8139	8.29442	75.1927	0.483347
0.0202359	0.00429193	23.282	8.6848	74.0432	0.456635
0.0202359	0.00719686	22.7563	9.06119	72.9343	0.430427
0.0202359	0.0120679	22.2406	9.42005	71.8773	0.404937
0.0202359	0.0202359	21.7393	9.75777	70.8834	0.380401
0.0202359	0.0339322	21.2567	10.0708	69.9642	0.357062
0.0202359	0.0568987	20.7976	10.3557	69.1309	0.335176
0.0202359	0.0954095	20.3678	10.6094	68.3929	0.31502
0.0202359	0.159986	19.9734	10.8292	67.7587	0.296865
0.0202359	0.26827	19.6214	11.0135	67.2326	0.280983
0.0202359	0.449843	19.3183	11.162	66.8142	0.267593
0.0202359	0.754312	19.0694	11.2763	66.497	0.25681
0.0202359	1.26486	18.876	11.3601	66.2682	0.248576
0.0202359	2.12095	18.7342	11.4185	66.1111	0.242623
0.0202359	3.55648	18.6358	11.4574	66.0075	0.238538
0.0202359	5.96362	18.5707	11.4825	65.9414	0.235855
0.0202359	10	18.5291	11.4983	65.9002	0.234149
0.0339322	1e-10	35.8982	0.31857	95.8129	0.982408
0.0339322	1.67683e-10	35.8497	0.361412	95.6931	0.980039
0.0339322	2.81177e-10	35.7942	0.41021	95.5567	0.977339
0.0339322	4.71487e-10	35.7309	0.465684	95.4018	0.974269
0.0339322	7.90604e-10	35.6589	0.528554	95.2262	0.970788
0.0339322	1.32571e-09	35.5771	0.599645	95.0277	0.966849
0.0339322	2.223e-09	35.4846	0.679826	94.8038	0.962404
0.0339322	3.72759e-09	35.3801	0.770011	94.5521	0.957399
0.0339322	6.25055e-09	35.2625	0.871156	94.2698	0.951782
0.0339322	1.04811e-08	35.1307	0.984193	93.9544	0.945497
0.0339322	1.75751e-08	34.9832	1.11013	93.6029	0.938486
0.0339322	2.94705e-08	34.8189	1.24992	93.2127	0.930693
0.0339322	4.94171e-08	34.6365	1.40449	92.7812	0.922061
0.0339322	8.28643e-08	34.4347	1.57475	92.3057	0.912537
0.0339322	1.3895e-07	34.2123	1.7615	91.7841	0.902068
0.0339322	2.32995e-07	33.9683	1.96545	91.2142	0.890607
0.0339322	3.90694e-07	33.7018	2.18716	90.5944	0.878115
0.0339322	6.55129e-07	33.4118	2.42708	89.9233	0.864556
0.0339322	1.09854e-06	33.0976	2.68544	89.2002	0.849904
0.0339322	1.84207e-06	32.7589	2.96228	88.4247	0.834144
0.0339322	3.08884e-06	32.3955	3.25745	87.5972	0.817269
0.0339322	5.17947e-06	32.0072	3.57042	86.719	0.799289
0.0339322	8.68511e-06	31.5945	3.9008	85.7908	0.780208
0.0339322	1.45635e-05	31.158	4.24726	84.8164	0.760077
0.0339322	2.44205e-05	30.6986	4.60876	83.7985	0.738935
0.0339322	4.09492e-05	30.2174	4.98387	82.7409	0.716836
0.0339322	6.86649e-05	29.716	5.37083	81.6484	0.693856
0.0339322	0.00011514	29.1964	5.76766	80.5262	0.670081
0.0339322	0.00019307	28.6606	6.17213	79.3808	0.645613
0.0339322	0.000323746	28.1105	6.58201	78.2186	0.620551
0.0339322	0.000542868	27.5495	6.99436	77.0475	0.595045
0.0339322	0.000910298	26.9805	7.40644	75.8757	0.56923
0.0339322	0.00152642	26.4064	7.81522	74.7121	0.543259
0.0339322	0.00255955	25.8309	8.21749	73.5661	0.517306
0.0339322	0.00429193	25.2579	8.60987	72.4476	0.49156
0.0339322	0.00719686	24.6906	8.98901	71.3676	0.466205
0.0339322	0.0120679	24.1339	9.35122	70.3365	0.44147
0.0339322	0.0202359	23.5918	9.69294	69.366	0.417575
0.0339322	0.0339322	23.0695	10.0105	68.4674	0.39477
0.0339322	0.0568987	22.5721	10.3003	67.6518	0.373316
0.0339322	0.0954095	22.1061	10.5591	66.929	0.353498
0.0339322	0.159986	21.6784	10.7839	66.3074	0.335603
0.0339322	0.26827	21.2963	10.973	65.7919	0.319911
0.0339322	0.449843	20.9674	11.1257	65.3823	0.306659
0.0339322	0.754312	20.6972	11.2436	65.0722	0.295974
0.0339322	1.26486	20.4873	11.33	64.849	0.287807
0.0339322	2.12095	20.3333	11.3904	64.696	0.2819
0.0339322	3.55648	20.2266	11.4307	64.5952	0.277846
0.0339322	5.96362	20.156	11.4567	64.5312	0.275184
0.0339322	10	20.1109	11.473	64.4913	0.273491
0.0568987	1e-10	38.6374	0.312563	93.2577	0.983951
0.0568987	1.67683e-10	38.5864	0.354444	93.1436	0.981796
0.0568987	2.81177e-10	38.528	0.402148	93.0138	0.97934
0.0568987	4.71487e-10	38.4615	0.456363	92.8664	0.976547
0.0568987	7.90604e-10	38.3857	0.517855	92.6992	0.973377
0.0568987	1.32571e-09	38.2997	0.587389	92.5103	0.96979
0.0568987	2.223e-09	38.2022	0.665877	92.297	0.965737
0.0568987	3.72759e-09	38.0923	0.754128	92.0573	0.961174
0.0568987	6.25055e-09	37.9685	0.85315	91.7884	0.956048
0.0568987	1.04811e-08	37.8296	0.963888	91.4878	0.950307
0.0568987	1.75751e-08	37.6742	1.08729	91.1527	0.943899
0.0568987	2.94705e-08	37.501	1.22435	90.7806	0.936768
0.0568987	4.94171e-08	37.3086	1.37599	90.3689	0.928861
0.0568987	8.28643e-08	37.0957	1.54311	89.9151	0.920126
0.0568987	1.3895e-07	36.8609	1.72655	89.4169	0.910512
0.0568987	2.32995e-07	36.6032	1.92702	88.8723	0.899974
0.0568987	3.90694e-07	36.3214	2.14511	88.2796	0.888469
0.0568987	6.55129e-07	36.0146	2.38129	87.6375	0.875962
0.0568987	1.09854e-06	35.6822	2.63583	86.9452	0.862424
0.0568987	1.84207e-06	35.3234	2.90887	86.2021	0.847831
0.0568987	3.08884e-06	34.9381	3.20013	85.4089	0.832183
0.0568987	5.17947e-06	34.5264	3.50927	84.5664	0.815475
0.0568987	8.68511e-06	34.0882	3.83597	83.6752	0.797703
0.0568987	1.45635e-05	33.6245	4.17885	82.7391	0.778916
0.0568987	2.44205e-05	33.136	4.53706	81.7602	0.759135
0.0568987	4.09492e-05	32.624	4.90912	80.7424	0.738411
0.0568987	6.86649e-05	32.09	5.29337	79.69	0.716806
0.0568987	0.00011514	31.536	5.68793	78.6082	0.694394
0.0568987	0.00019307	30.9641	6.0906	77.5029	0.671264
0.0568987	0.000323746	30.3769	6.49904	76.3806	0.647519
0.0568987	0.000542868	29.7771	6.91067	75.2485	0.623272
0.0568987	0.000910298	29.1679	7.3227	74.1144	0.598653
0.0568987	0.00152642	28.5528	7.73204	72.9871	0.573814
0.0568987	0.00255955	27.9355	8.13556	71.8755	0.548915
0.0568987	0.00429193	27.3199	8.52994	70.7895	0.52413
0.0568987	0.00719686	26.7103	8.91174	69.7392	0.499651
0.0568987	0.0120679	26.1109	9.27738	68.7355	0.475681
0.0568987	0.0202359	25.5268	9.62316	67.7894	0.452451
0.0568987	0.0339322	24.9634	9.94535	66.912	0.430208
0.0568987	0.0568987	24.4264	10.2403	66.1146	0.409216
0.0568987	0.0954095	23.9228	10.5043	65.4074	0.389764
0.0568987	0.159986	23.4601	10.7345	64.7988	0.372151
0.0568987	0.26827	23.0467	10.9287	64.294	0.356672
0.0568987	0.449843	22.6908	11.0859	63.8931	0.343577
0.0568987	0.754312	22.3984	11.2075	63.59	0.333005
0.0568987	1.26486	22.1712	11.2969	63.3722	0.324915
0.0568987	2.12095	22.0047	11.3594	63.2232	0.319063
0.0568987	3.55648	21.8893	11.4012	63.1254	0.315047
0.0568987	5.96362	21.8129	11.4282	63.0632	0.312406
[truncated: 501 more rows]

## Sheet: Init. abundance
Init abund RI (mM)	Init abund FP (mM)	Final abund. RI (mM)	Final abund. FP (mM)	Final abund. BH (mM)	Ratio (RI-FP)/(RI+FP)
0.0001	0.0001	0.0125448	0.240843	129.17	-0.900983		Simulation result for the last time point obtained with the kinetic model using parameterization 2 and different initial abundances.
0.0001	0.000126486	0.0125195	0.302198	128.937	-0.92044
0.0001	0.000159986	0.0124881	0.378474	128.648	-0.936116
0.0001	0.000202359	0.0124491	0.4728	128.29	-0.94869		RI: Roseburia intestinalis L1-82
0.0001	0.000255955	0.012401	0.588959	127.849	-0.958757		FP: Faecalibacterium prausnitzii A2-165
0.0001	0.000323746	0.0123419	0.731182	127.309	-0.966802		BH: Blautia hydrogenotrophica S5a33
0.0001	0.000409492	0.0122699	0.90395	126.652	-0.973216
0.0001	0.000517947	0.0121827	1.1121	125.859	-0.978328
0.0001	0.000655129	0.0120781	1.36077	124.91	-0.982404
0.0001	0.000828643	0.0119537	1.65443	123.787	-0.985653
0.0001	0.00104811	0.0118074	1.99725	122.473	-0.988246
0.0001	0.00132571	0.0116374	2.39239	120.954	-0.990318
0.0001	0.00167683	0.0114422	2.84156	119.22	-0.991979
0.0001	0.00212095	0.011221	3.34479	117.27	-0.993313
0.0001	0.0026827	0.0109738	3.90002	115.108	-0.994388
0.0001	0.00339322	0.0107014	4.50296	112.746	-0.995258
0.0001	0.00429193	0.0104055	5.14699	110.207	-0.995965
0.0001	0.00542868	0.0100888	5.82315	107.521	-0.996541
0.0001	0.00686649	0.00975505	6.52046	104.728	-0.997012
0.0001	0.00868511	0.0094087	7.22594	101.873	-0.997399
0.0001	0.0109854	0.00905489	7.92536	99.0123	-0.997718
0.0001	0.013895	0.00869936	8.6032	96.2041	-0.99798
0.0001	0.0175751	0.00834803	9.24381	93.511	-0.998195
0.0001	0.02223	0.00800666	9.83214	90.9945	-0.998373
0.0001	0.0281177	0.00768035	10.355	88.7111	-0.998518
0.0001	0.0355648	0.0073731	10.803	86.7045	-0.998636
0.0001	0.0449843	0.00708707	11.1718	84.9991	-0.998732
0.0001	0.0568987	0.00682262	11.4639	83.5948	-0.99881
0.0001	0.0719686	0.00657822	11.6878	82.4677	-0.998875
0.0001	0.0910298	0.00635116	11.8565	81.5774	-0.998929
0.0001	0.11514	0.0061384	11.9844	80.8777	-0.998976
0.0001	0.145635	0.00593713	12.0852	80.3249	-0.999018
0.0001	0.184207	0.00574517	12.1705	79.8834	-0.999056
0.0001	0.232995	0.00556094	12.2501	79.526	-0.999093
0.0001	0.294705	0.00538342	12.3319	79.2332	-0.999127
0.0001	0.372759	0.00521199	12.423	78.9911	-0.999161
0.0001	0.471487	0.00504628	12.5301	78.7898	-0.999195
0.0001	0.596362	0.00488621	12.6604	78.6221	-0.999228
0.0001	0.754312	0.00473178	12.8217	78.4824	-0.999262
0.0001	0.954095	0.0045831	13.0236	78.3665	-0.999296
0.0001	1.20679	0.00444038	13.2776	78.2707	-0.999331
0.0001	1.52642	0.00430383	13.598	78.192	-0.999367
0.0001	1.9307	0.00417377	14.0027	78.128	-0.999404
0.0001	2.44205	0.00405051	14.5143	78.0763	-0.999442
0.0001	3.08884	0.00393421	15.1612	78.0351	-0.999481
0.0001	3.90694	0.00382518	15.9793	78.0025	-0.999521
0.0001	4.94171	0.00372357	17.0141	77.9771	-0.999562
0.0001	6.25055	0.0036295	18.323	77.9575	-0.999604
0.0001	7.90604	0.00354296	19.9785	77.9426	-0.999645
0.0001	10	0.00346385	22.0724	77.9313	-0.999686
0.000126486	0.0001	0.0158669	0.240837	129.166	-0.87638
0.000126486	0.000126486	0.015835	0.302192	128.934	-0.900417
0.000126486	0.000159986	0.0157953	0.378466	128.645	-0.919874
0.000126486	0.000202359	0.0157459	0.472783	128.287	-0.935537
0.000126486	0.000255955	0.015685	0.588947	127.846	-0.948117
0.000126486	0.000323746	0.0156103	0.731111	127.306	-0.95819
0.000126486	0.000409492	0.0155192	0.903866	126.649	-0.96624
0.000126486	0.000517947	0.015409	1.11215	125.856	-0.972668
0.000126486	0.000655129	0.0152766	1.36065	124.908	-0.977794
0.000126486	0.000828643	0.0151193	1.65429	123.785	-0.981887
0.000126486	0.00104811	0.0149344	1.9971	122.471	-0.985155
0.000126486	0.00132571	0.0147193	2.39233	120.951	-0.98777
0.000126486	0.00167683	0.0144725	2.84137	119.218	-0.989865
0.000126486	0.00212095	0.0141927	3.34473	117.268	-0.991549
0.000126486	0.0026827	0.01388	3.89996	115.105	-0.992907
0.000126486	0.00339322	0.0135355	4.5028	112.744	-0.994006
0.000126486	0.00429193	0.0131611	5.14692	110.205	-0.994899
0.000126486	0.00542868	0.0127606	5.82308	107.519	-0.995627
0.000126486	0.00686649	0.0123385	6.52039	104.725	-0.996223
0.000126486	0.00868511	0.0119004	7.22593	101.871	-0.996712
0.000126486	0.0109854	0.0114529	7.92529	99.0103	-0.997114
0.000126486	0.013895	0.0110032	8.60312	96.2023	-0.997445
0.000126486	0.0175751	0.0105589	9.24374	93.5091	-0.997718
0.000126486	0.02223	0.0101271	9.83208	90.9928	-0.997942
0.000126486	0.0281177	0.00971435	10.355	88.7094	-0.998125
0.000126486	0.0355648	0.00932569	10.8029	86.7029	-0.998275
0.000126486	0.0449843	0.00896396	11.1718	84.9975	-0.998397
0.000126486	0.0568987	0.00862946	11.4638	83.5932	-0.998496
0.000126486	0.0719686	0.00832034	11.6878	82.4662	-0.998577
0.000126486	0.0910298	0.00803315	11.8565	81.5759	-0.998646
0.000126486	0.11514	0.00776404	11.9844	80.8763	-0.998705
0.000126486	0.145635	0.00750948	12.0852	80.3235	-0.998758
0.000126486	0.184207	0.00726669	12.1705	79.882	-0.998807
0.000126486	0.232995	0.00703368	12.2501	79.5246	-0.998852
0.000126486	0.294705	0.00680915	12.3319	79.2318	-0.998896
0.000126486	0.372759	0.0065923	12.423	78.9898	-0.998939
0.000126486	0.471487	0.00638272	12.5301	78.7886	-0.998982
0.000126486	0.596362	0.00618026	12.6604	78.6209	-0.999024
0.000126486	0.754312	0.00598493	12.8217	78.4813	-0.999067
0.000126486	0.954095	0.00579687	13.0236	78.3653	-0.99911
0.000126486	1.20679	0.00561636	13.2776	78.2696	-0.999154
0.000126486	1.52642	0.00544365	13.598	78.191	-0.9992
0.000126486	1.9307	0.00527915	14.0027	78.127	-0.999246
0.000126486	2.44205	0.00512323	14.5143	78.0753	-0.999294
0.000126486	3.08884	0.00497615	15.1612	78.0341	-0.999344
0.000126486	3.90694	0.00483825	15.9793	78.0016	-0.999395
0.000126486	4.94171	0.00470973	17.0141	77.9762	-0.999447
0.000126486	6.25055	0.00459074	18.323	77.9566	-0.999499
0.000126486	7.90604	0.00448129	19.9785	77.9417	-0.999551
0.000126486	10	0.00438122	22.0724	77.9304	-0.999603
0.000159986	0.0001	0.0200688	0.24083	129.163	-0.846157
0.000159986	0.000126486	0.0200284	0.30221	128.93	-0.875692
0.000159986	0.000159986	0.0199781	0.378423	128.641	-0.899709
0.000159986	0.000202359	0.0199157	0.472806	128.283	-0.91916
0.000159986	0.000255955	0.0198387	0.58893	127.842	-0.934824
0.000159986	0.000323746	0.0197442	0.731087	127.302	-0.947407
0.000159986	0.000409492	0.019629	0.903905	126.645	-0.957492
0.000159986	0.000517947	0.0194895	1.11212	125.852	-0.965554
0.000159986	0.000655129	0.0193221	1.36061	124.904	-0.971996
0.000159986	0.000828643	0.0191232	1.65425	123.781	-0.977144
0.000159986	0.00104811	0.0188892	1.99716	122.467	-0.981261
0.000159986	0.00132571	0.0186172	2.39228	120.948	-0.984556
0.000159986	0.00167683	0.0183051	2.84132	119.215	-0.987198
0.000159986	0.00212095	0.0179512	3.34466	117.264	-0.989323
0.000159986	0.0026827	0.0175557	3.89988	115.102	-0.991037
0.000159986	0.00339322	0.01712	4.50268	112.741	-0.992424
0.000159986	0.00429193	0.0166466	5.1467	110.202	-0.993552
0.000159986	0.00542868	0.0161399	5.82298	107.516	-0.994472
0.000159986	0.00686649	0.015606	6.52028	104.723	-0.995225
0.000159986	0.00868511	0.0150519	7.22577	101.869	-0.995842
0.000159986	0.0109854	0.0144859	7.92516	99.008	-0.996351
0.000159986	0.013895	0.0139171	8.60304	96.1998	-0.99677
0.000159986	0.0175751	0.0133551	9.24366	93.5068	-0.997115
0.000159986	0.02223	0.012809	9.83201	90.9905	-0.997398
0.000159986	0.0281177	0.012287	10.3549	88.7072	-0.99763
0.000159986	0.0355648	0.0117954	10.8029	86.7007	-0.997819
0.000159986	0.0449843	0.0113378	11.1717	84.9954	-0.997972
0.000159986	0.0568987	0.0109148	11.4638	83.5911	-0.998098
0.000159986	0.0719686	0.0105238	11.6878	82.4642	-0.998201
0.000159986	0.0910298	0.0101606	11.8565	81.574	-0.998288
0.000159986	0.11514	0.00982018	11.9844	80.8744	-0.998363
0.000159986	0.145635	0.00949821	12.0852	80.3217	-0.998429
0.000159986	0.184207	0.00919112	12.1705	79.8802	-0.998491
0.000159986	0.232995	0.00889641	12.2501	79.5229	-0.998549
0.000159986	0.294705	0.00861242	12.3319	79.2302	-0.998604
0.000159986	0.372759	0.00833817	12.423	78.9882	-0.998659
0.000159986	0.471487	0.00807307	12.5301	78.787	-0.998712
0.000159986	0.596362	0.007817	12.6604	78.6194	-0.998766
0.000159986	0.754312	0.00756993	12.8217	78.4798	-0.99882
0.000159986	0.954095	0.00733208	13.0236	78.3639	-0.998875
0.000159986	1.20679	0.00710377	13.2776	78.2682	-0.998931
0.000159986	1.52642	0.00688532	13.598	78.1896	-0.998988
0.000159986	1.9307	0.00667728	14.0027	78.1257	-0.999047
0.000159986	2.44205	0.00648005	14.5143	78.0741	-0.999107
0.000159986	3.08884	0.00629402	15.1612	78.0329	-0.99917
0.000159986	3.90694	0.0061196	15.9793	78.0004	-0.999234
0.000159986	4.94171	0.00595705	17.0141	77.9751	-0.9993
0.000159986	6.25055	0.00580655	18.323	77.9555	-0.999366
0.000159986	7.90604	0.0056681	19.9785	77.9406	-0.999433
0.000159986	10	0.00554154	22.0724	77.9294	-0.999498
0.000202359	0.0001	0.0253831	0.240844	129.158	-0.809312
0.000202359	0.000126486	0.025332	0.3022	128.925	-0.845316
0.000202359	0.000159986	0.0252683	0.378411	128.636	-0.87481
0.000202359	0.000202359	0.0251895	0.472789	128.278	-0.898833
0.000202359	0.000255955	0.0250921	0.588909	127.838	-0.918267
0.000202359	0.000323746	0.0249726	0.731119	127.297	-0.933943
0.000202359	0.000409492	0.0248269	0.903885	126.64	-0.946535
0.000202359	0.000517947	0.0246505	1.112	125.848	-0.956626
0.000202359	0.000655129	0.0244388	1.36057	124.899	-0.964709
0.000202359	0.000828643	0.0241871	1.65429	123.776	-0.97118
0.000202359	0.00104811	0.0238912	1.9971	122.462	-0.976357
0.000202359	0.00132571	0.0235472	2.39221	120.943	-0.980505
0.000202359	0.00167683	0.0231524	2.84124	119.211	-0.983834
0.000202359	0.00212095	0.0227048	3.34457	117.26	-0.986514
0.000202359	0.0026827	0.0222046	3.89978	115.098	-0.988677
0.000202359	0.00339322	0.0216535	4.50259	112.737	-0.990428
0.000202359	0.00429193	0.0210547	5.14672	110.198	-0.991852
0.000202359	0.00542868	0.020414	5.82288	107.513	-0.993013
0.000202359	0.00686649	0.0197387	6.52016	104.719	-0.993964
0.000202359	0.00868511	0.0190378	7.22571	101.865	-0.994744
0.000202359	0.0109854	0.018322	7.92504	99.0048	-0.995387
0.000202359	0.013895	0.0176026	8.60293	96.1968	-0.995916
0.000202359	0.0175751	0.0168918	9.24356	93.5039	-0.996352
0.000202359	0.02223	0.016201	9.83191	90.9877	-0.99671
0.000202359	0.0281177	0.0155408	10.3548	88.7044	-0.997003
0.000202359	0.0355648	0.0149191	10.8028	86.698	-0.997242
0.000202359	0.0449843	0.0143403	11.1717	84.9928	-0.997436
0.000202359	0.0568987	0.0138052	11.4638	83.5886	-0.997594
0.000202359	0.0719686	0.0133107	11.6877	82.4617	-0.997725
0.000202359	0.0910298	0.0128513	11.8565	81.5715	-0.997835
0.000202359	0.11514	0.0124208	11.9844	80.872	-0.997929
0.000202359	0.145635	0.0120135	12.0852	80.3194	-0.998014
0.000202359	0.184207	0.0116251	12.1705	79.8779	-0.998091
0.000202359	0.232995	0.0112524	12.2501	79.5207	-0.998165
0.000202359	0.294705	0.0108932	12.3319	79.2281	-0.998235
0.000202359	0.372759	0.0105463	12.423	78.9861	-0.998304
0.000202359	0.471487	0.010211	12.5301	78.785	-0.998371
0.000202359	0.596362	0.00988715	12.6604	78.6175	-0.998439
0.000202359	0.754312	0.00957467	12.8217	78.478	-0.998508
0.000202359	0.954095	0.00927383	13.0236	78.3621	-0.998577
0.000202359	1.20679	0.00898505	13.2776	78.2665	-0.998648
0.000202359	1.52642	0.00870876	13.598	78.188	-0.99872
0.000202359	1.9307	0.0084456	14.0027	78.1241	-0.998794
0.000202359	2.44205	0.00819618	14.5143	78.0725	-0.998871
0.000202359	3.08884	0.0079609	15.1612	78.0314	-0.99895
0.000202359	3.90694	0.00774026	15.9793	77.9989	-0.999032
0.000202359	4.94171	0.00753468	17.0141	77.9736	-0.999115
0.000202359	6.25055	0.00734432	18.323	77.9541	-0.999199
0.000202359	7.90604	0.00716921	19.9785	77.9392	-0.999283
0.000202359	10	0.00700914	22.0724	77.928	-0.999365
0.000255955	0.0001	0.0321043	0.240809	129.151	-0.764729
0.000255955	0.000126486	0.0320397	0.302158	128.919	-0.808259
0.000255955	0.000159986	0.0319592	0.378389	128.63	-0.844233
0.000255955	0.000202359	0.0318595	0.472771	128.272	-0.873731
0.000255955	0.000255955	0.0317363	0.58888	127.832	-0.897726
0.000255955	0.000323746	0.0315852	0.731032	127.292	-0.917166
0.000255955	0.000409492	0.0314009	0.90377	126.635	-0.932845
0.000255955	0.000517947	0.0311778	1.11204	125.841	-0.945456
0.000255955	0.000655129	0.0309101	1.36059	124.893	-0.955573
0.000255955	0.000828643	0.0305917	1.65423	123.771	-0.963685
0.000255955	0.00104811	0.0302176	1.99691	122.457	-0.970187
0.000255955	0.00132571	0.0297824	2.39212	120.938	-0.975406
0.000255955	0.00167683	0.0292831	2.84114	119.205	-0.979597
0.000255955	0.00212095	0.0287171	3.34435	117.255	-0.982973
0.000255955	0.0026827	0.0280844	3.89966	115.093	-0.985699
0.000255955	0.00339322	0.0273872	4.50256	112.732	-0.987908
0.000255955	0.00429193	0.02663	5.14657	110.194	-0.989705
0.000255955	0.00542868	0.0258196	5.82273	107.508	-0.991171
0.000255955	0.00686649	0.0249655	6.52001	104.715	-0.992371
0.000255955	0.00868511	0.0240792	7.22553	101.861	-0.993357
0.000255955	0.0109854	0.0231737	7.9249	99.0008	-0.994169
0.000255955	0.013895	0.0222639	8.60278	96.1929	-0.994837
0.000255955	0.0175751	0.021365	9.24342	93.5002	-0.995388
0.000255955	0.02223	0.0204911	9.83179	90.9841	-0.99584
0.000255955	0.0281177	0.0196561	10.3547	88.701	-0.996211
0.000255955	0.0355648	0.0188698	10.8027	86.6946	-0.996513
0.000255955	0.0449843	0.0181377	11.1716	84.9895	-0.996758
0.000255955	0.0568987	0.017461	11.4637	83.5853	-0.996958
0.000255955	0.0719686	0.0168355	11.6877	82.4585	-0.997123
0.000255955	0.0910298	0.0162544	11.8565	81.5685	-0.997262
0.000255955	0.11514	0.01571	11.9844	80.869	-0.997382
0.000255955	0.145635	0.0151949	12.0852	80.3164	-0.997489
0.000255955	0.184207	0.0147036	12.1705	79.8751	-0.997587
0.000255955	0.232995	0.0142322	12.2501	79.518	-0.997679
0.000255955	0.294705	0.0137779	12.3319	79.2254	-0.997768
0.000255955	0.372759	0.0133391	12.423	78.9836	-0.997855
0.000255955	0.471487	0.0129151	12.5301	78.7825	-0.997941
0.000255955	0.596362	0.0125055	12.6604	78.6151	-0.998026
0.000255955	0.754312	0.0121102	12.8217	78.4756	-0.998113
0.000255955	0.954095	0.0117297	13.0236	78.3599	-0.9982
0.000255955	1.20679	0.0113645	13.2776	78.2643	-0.99829
0.000255955	1.52642	0.011015	13.598	78.1859	-0.998381
0.000255955	1.9307	0.0106822	14.0027	78.122	-0.998475
0.000255955	2.44205	0.0103667	14.5143	78.0705	-0.998573
0.000255955	3.08884	0.0100691	15.1612	78.0295	-0.998673
0.000255955	3.90694	0.00979009	15.9793	77.997	-0.998775
0.000255955	4.94171	0.00953006	17.0141	77.9718	-0.99888
0.000255955	6.25055	0.00928931	18.323	77.9523	-0.998987
0.000255955	7.90604	0.00906783	19.9785	77.9375	-0.999093
0.000255955	10	0.00886536	22.0724	77.9263	-0.999197
0.000323746	0.0001	0.0406048	0.240795	129.144	-0.711409
0.000323746	0.000126486	0.040523	0.30214	128.911	-0.763482
0.000323746	0.000159986	0.0404213	0.378369	128.622	-0.806962
0.000323746	0.000202359	0.0402951	0.472736	128.264	-0.842913
0.000323746	0.000255955	0.0401394	0.588847	127.824	-0.872368
0.000323746	0.000323746	0.0399482	0.730991	127.284	-0.896365
0.000323746	0.000409492	0.0397151	0.903795	126.627	-0.915814
0.000323746	0.000517947	0.039433	1.1119	125.834	-0.9315
0.000323746	0.000655129	0.0390944	1.36053	124.886	-0.944136
0.000323746	0.000828643	0.0386919	1.65404	123.764	-0.954285
0.000323746	0.00104811	0.0382184	1.99694	122.45	-0.962442
0.000323746	0.00132571	0.0376682	2.392	120.931	-0.968993
0.000323746	0.00167683	0.0370365	2.84114	119.198	-0.974264
0.000323746	0.00212095	0.0363207	3.34432	117.248	-0.978512
0.000323746	0.0026827	0.0355207	3.8995	115.087	-0.981946
0.000323746	0.00339322	0.034639	4.50239	112.726	-0.984731
0.000323746	0.00429193	0.0336815	5.14626	110.188	-0.986995
0.000323746	0.00542868	0.0326564	5.82254	107.502	-0.988845
0.000323746	0.00686649	0.0315763	6.51972	104.71	-0.99036
0.000323746	0.00868511	0.0304551	7.2253	101.856	-0.991605
0.000323746	0.0109854	0.02931	7.92473	98.9956	-0.99263
0.000323746	0.013895	0.0281593	8.60259	96.1881	-0.993475
0.000323746	0.0175751	0.0270221	9.24326	93.4955	-0.99417
0.000323746	0.02223	0.0259171	9.83165	90.9796	-0.994742
0.000323746	0.0281177	0.0248611	10.3546	88.6965	-0.99521
0.000323746	0.0355648	0.0238663	10.8026	86.6904	-0.995591
0.000323746	0.0449843	0.0229406	11.1715	84.9853	-0.995901
0.000323746	0.0568987	0.0220846	11.4637	83.5813	-0.996154
0.000323746	0.0719686	0.0212935	11.6877	82.4545	-0.996363
0.000323746	0.0910298	0.0205586	11.8564	81.5646	-0.996538
0.000323746	0.11514	0.0198699	11.9844	80.8651	-0.99669
0.000323746	0.145635	0.0192185	12.0851	80.3127	-0.996825
0.000323746	0.184207	0.0185972	12.1705	79.8715	-0.996949
0.000323746	0.232995	0.0180009	12.2501	79.5145	-0.997065
0.000323746	0.294705	0.0174263	12.3319	79.222	-0.997178
0.000323746	0.372759	0.0168715	12.423	78.9803	-0.997288
0.000323746	0.471487	0.0163351	12.5301	78.7794	-0.997396
0.000323746	0.596362	0.015817	12.6604	78.612	-0.997504
0.000323746	0.754312	0.0153171	12.8217	78.4727	-0.997614
0.000323746	0.954095	0.0148359	13.0236	78.357	-0.997724
0.000323746	1.20679	0.014374	13.2776	78.2615	-0.997837
0.000323746	1.52642	0.013932	13.598	78.1832	-0.997953
0.000323746	1.9307	0.013511	14.0027	78.1194	-0.998072
0.000323746	2.44205	0.013112	14.5143	78.068	-0.998195
0.000323746	3.08884	0.0127356	15.1612	78.027	-0.998321
0.000323746	3.90694	0.0123827	15.9793	77.9947	-0.998451
0.000323746	4.94171	0.0120538	17.0141	77.9695	-0.998584
0.000323746	6.25055	0.0117493	18.323	77.9501	-0.998718
0.000323746	7.90604	0.0114692	19.9785	77.9353	-0.998853
0.000323746	10	0.0112131	22.0724	77.9242	-0.998984
0.000409492	0.0001	0.0513552	0.240794	129.133	-0.648432
0.000409492	0.000126486	0.0512516	0.302118	128.901	-0.709926
0.000409492	0.000159986	0.0511231	0.378373	128.612	-0.761939
0.000409492	0.000202359	0.0509635	0.472706	128.255	-0.80536
0.000409492	0.000255955	0.0507665	0.588851	127.814	-0.84126
0.000409492	0.000323746	0.0505248	0.731001	127.274	-0.870702
0.000409492	0.000409492	0.0502299	0.903665	126.617	-0.894685
0.000409492	0.000517947	0.0498731	1.1119	125.825	-0.914143
0.000409492	0.000655129	0.0494449	1.36035	124.877	-0.929855
0.000409492	0.000828643	0.0489359	1.65404	123.754	-0.942529
0.000409492	0.00104811	0.0483372	1.99682	122.441	-0.95273
0.000409492	0.00132571	0.0476413	2.39186	120.922	-0.960942
0.000409492	0.00167683	0.0468424	2.84097	119.189	-0.967559
0.000409492	0.00212095	0.0459374	3.34401	117.241	-0.972898
0.000409492	0.0026827	0.0449253	3.89931	115.079	-0.97722
0.000409492	0.00339322	0.0438104	4.50206	112.719	-0.980725
0.000409492	0.00429193	0.042599	5.14615	110.18	-0.98358
0.000409492	0.00542868	0.041303	5.82219	107.496	-0.985912
0.000409492	0.00686649	0.0399368	6.51948	104.703	-0.987823
0.000409492	0.00868511	0.0385188	7.22509	101.849	-0.989394
0.000409492	0.0109854	0.0370705	7.92448	98.9893	-0.990688
0.000409492	0.013895	0.0356151	8.60238	96.1819	-0.991754
0.000409492	0.0175751	0.0341769	9.24305	93.4896	-0.992632
0.000409492	0.02223	0.0327794	9.83146	90.9738	-0.993354
0.000409492	0.0281177	0.0314437	10.3545	88.691	-0.993945
0.000409492	0.0355648	0.0301856	10.8025	86.6849	-0.994427
0.000409492	0.0449843	0.0290149	11.1714	84.9799	-0.994819
0.000409492	0.0568987	0.0279322	11.4636	83.576	-0.995139
0.000409492	0.0719686	0.0269317	11.6876	82.4494	-0.995402
0.000409492	0.0910298	0.0260022	11.8564	81.5596	-0.995623
0.000409492	0.11514	0.0251312	11.9843	80.8604	-0.995815
0.000409492	0.145635	0.0243073	12.0851	80.308	-0.995985
0.000409492	0.184207	0.0235215	12.1705	79.867	-0.996142
0.000409492	0.232995	0.0227674	12.2501	79.5101	-0.99629
0.000409492	0.294705	0.0220407	12.3319	79.2178	-0.996432
0.000409492	0.372759	0.0213389	12.423	78.9762	-0.99657
0.000409492	0.471487	0.0206606	12.5301	78.7754	-0.996708
0.000409492	0.596362	0.0200053	12.6604	78.6081	-0.996845
0.000409492	0.754312	0.0193731	12.8217	78.4689	-0.996983
0.000409492	0.954095	0.0187645	13.0236	78.3534	-0.997123
0.000409492	1.20679	0.0181803	13.2776	78.258	-0.997265
0.000409492	1.52642	0.0176212	13.598	78.1798	-0.997412
0.000409492	1.9307	0.0170888	14.0027	78.1161	-0.997562
0.000409492	2.44205	0.0165842	14.5143	78.0648	-0.997717
0.000409492	3.08884	0.0161081	15.1612	78.0239	-0.997877
0.000409492	3.90694	0.0156618	15.9793	77.9917	-0.998042
0.000409492	4.94171	0.0152458	17.0141	77.9665	-0.998209
0.000409492	6.25055	0.0148607	18.323	77.9472	-0.998379
0.000409492	7.90604	0.0145064	19.9785	77.9325	-0.998549
0.000409492	10	0.0141825	22.0724	77.9215	-0.998716
0.000517947	0.0001	0.0649503	0.240778	129.121	-0.575111
0.000517947	0.000126486	0.0648193	0.302093	128.889	-0.646676
0.000517947	0.000159986	0.0646566	0.378307	128.6	-0.708073
0.000517947	0.000202359	0.064455	0.472662	128.242	-0.759997
0.000517947	0.000255955	0.0642058	0.588735	127.802	-0.803333
0.000517947	0.000323746	0.0639001	0.730872	127.262	-0.839199
0.000517947	0.000409492	0.0635273	0.903578	126.605	-0.868624
0.000517947	0.000517947	0.0630761	1.1118	125.813	-0.892625
0.000517947	0.000655129	0.0625345	1.36033	124.865	-0.912101
0.000517947	0.000828643	0.0618908	1.65391	123.743	-0.927858
0.000517947	0.00104811	0.0611336	1.99666	122.429	-0.940583
0.000517947	0.00132571	0.0602538	2.39156	120.911	-0.95085
0.000517947	0.00167683	0.0592436	2.84064	119.179	-0.959141
0.000517947	0.00212095	0.0580985	3.34391	117.23	-0.965845
0.000517947	0.0026827	0.0568191	3.89892	115.069	-0.971273
0.000517947	0.00339322	0.0554086	4.50193	112.708	-0.975684
0.000517947	0.00429193	0.0538771	5.14576	110.171	-0.979277
0.000517947	0.00542868	0.0522376	5.82199	107.486	-0.982215
0.000517947	0.00686649	0.05051	6.5192	104.694	-0.984623
0.000517947	0.00868511	0.0487168	7.22475	101.841	-0.986604
0.000517947	0.0109854	0.046885	7.92419	98.9811	-0.988236
0.000517947	0.013895	0.0450444	8.60209	96.1741	-0.989582
0.000517947	0.0175751	0.0432255	9.24278	93.482	-0.99069
0.000517947	0.02223	0.041458	9.83122	90.9666	-0.991601
0.000517947	0.0281177	0.0397686	10.3542	88.6839	-0.992348
0.000517947	0.0355648	0.0381777	10.8023	86.678	-0.992956
0.000517947	0.0449843	0.0366967	11.1713	84.9733	-0.993452
0.000517947	0.0568987	0.0353276	11.4635	83.5695	-0.993855
0.000517947	0.0719686	0.0340622	11.6876	82.443	-0.994188
0.000517947	0.0910298	0.0328866	11.8563	81.5534	-0.994468
0.000517947	0.11514	0.0317851	11.9843	80.8543	-0.99471
0.000517947	0.145635	0.0307431	12.0851	80.3022	-0.994925
0.000517947	0.184207	0.0297493	12.1705	79.8613	-0.995123
0.000517947	0.232995	0.0287956	12.2501	79.5045	-0.99531
0.000517947	0.294705	0.0278765	12.3319	79.2124	-0.995489
0.000517947	0.372759	0.0269889	12.423	78.9709	-0.995664
0.000517947	0.471487	0.0261311	12.5301	78.7703	-0.995838
0.000517947	0.596362	0.0253024	12.6604	78.6032	-0.996011
0.000517947	0.754312	0.0245028	12.8217	78.4642	-0.996185
0.000517947	0.954095	0.0237331	13.0236	78.3488	-0.996362
0.000517947	1.20679	0.0229942	13.2776	78.2536	-0.996542
0.000517947	1.52642	0.0222872	13.598	78.1755	-0.996727
0.000517947	1.9307	0.0216138	14.0027	78.112	-0.996918
0.000517947	2.44205	0.0209756	14.5143	78.0608	-0.997114
0.000517947	3.08884	0.0203735	15.1612	78.02	-0.997316
0.000517947	3.90694	0.019809	15.9793	77.9879	-0.997524
0.000517947	4.94171	0.0192829	17.0141	77.9629	-0.997736
0.000517947	6.25055	0.0187958	18.323	77.9436	-0.99795
0.000517947	7.90604	0.0183477	19.9785	77.929	-0.998165
0.000517947	10	0.0179381	22.0724	77.9181	-0.998376
0.000655129	0.0001	0.0821421	0.240725	129.105	-0.491171
0.000655129	0.000126486	0.0819767	0.302053	128.873	-0.573072
0.000655129	0.000159986	0.0817708	0.378262	128.584	-0.6445
0.000655129	0.000202359	0.0815158	0.472609	128.226	-0.705786
0.000655129	0.000255955	0.0812009	0.588729	127.786	-0.757584
0.000655129	0.000323746	0.0808142	0.73079	127.247	-0.800853
0.000655129	0.000409492	0.0803429	0.903542	126.59	-0.836682
0.000655129	0.000517947	0.0797722	1.1116	125.798	-0.866084
0.000655129	0.000655129	0.0790873	1.36018	124.85	-0.890101
0.000655129	0.000828643	0.0782733	1.65374	123.728	-0.909616
0.000655129	0.00104811	0.0773161	1.99634	122.415	-0.92543
0.000655129	0.00132571	0.0762031	2.39145	120.897	-0.938239
0.000655129	0.00167683	0.0749255	2.84051	119.165	-0.948601
0.000655129	0.00212095	0.0734776	3.34362	117.216	-0.956994
0.000655129	0.0026827	0.0718594	3.89873	115.056	-0.963804
0.000655129	0.00339322	0.070076	4.50157	112.696	-0.969343
0.000655129	0.00429193	0.0681389	5.14552	110.159	-0.973861
0.000655129	0.00542868	0.0660659	5.82162	107.474	-0.977558
0.000655129	0.00686649	0.0638808	6.51888	104.683	-0.980592
0.000655129	0.00868511	0.0616131	7.22441	101.83	-0.983087
0.000655129	0.0109854	0.0592966	7.92382	98.9709	-0.985144
0.000655129	0.013895	0.0569691	8.60171	96.1644	-0.986841
0.000655129	0.0175751	0.0546686	9.24245	93.4726	-0.98824
0.000655129	0.02223	0.0524338	9.83093	90.9573	-0.989389
0.000655129	0.0281177	0.0502969	10.354	88.675	-0.990332
0.000655129	0.0355648	0.0482845	10.8021	86.6694	-0.9911
0.000655129	0.0449843	0.0464118	11.1711	84.9647	-0.991725
0.000655129	0.0568987	0.0446801	11.4634	83.5612	-0.992235
0.000655129	0.0719686	0.0430798	11.6875	82.4348	-0.992655
0.000655129	0.0910298	0.0415931	11.8563	81.5454	-0.993008
0.000655129	0.11514	0.0402	11.9843	80.8466	-0.993314
0.000655129	0.145635	0.0388823	12.0851	80.2947	-0.993586
0.000655129	0.184207	0.0376255	12.1705	79.8539	-0.993836
0.000655129	0.232995	0.0364192	12.2501	79.4975	-0.994072
0.000655129	0.294705	0.035257	12.3319	79.2055	-0.994298
0.000655129	0.372759	0.0341345	12.423	78.9643	-0.99452
0.000655129	0.471487	0.0330496	12.5301	78.7639	-0.994739
0.000655129	0.596362	0.0320015	12.6604	78.5971	-0.994957
0.000655129	0.754312	0.0309903	12.8217	78.4582	-0.995178
0.000655129	0.954095	0.0300168	13.0236	78.343	-0.995401
0.000655129	1.20679	0.0290824	13.2776	78.248	-0.995629
0.000655129	1.52642	0.0281882	13.598	78.1701	-0.995863
0.000655129	1.9307	0.0273366	14.0027	78.1067	-0.996103
0.000655129	2.44205	0.0265294	14.5143	78.0557	-0.996351
0.000655129	3.08884	0.025768	15.1612	78.0151	-0.996607
0.000655129	3.90694	0.025054	15.9793	77.9831	-0.996869
0.000655129	4.94171	0.0243887	17.0141	77.9582	-0.997137
0.000655129	6.25055	0.0237726	18.323	77.9391	-0.997409
0.000655129	7.90604	0.0232059	19.9785	77.9246	-0.99768
0.000655129	10	0.0226879	22.0724	77.9137	-0.997946
0.000828643	0.0001	0.103881	0.240692	129.085	-0.397046
0.000828643	0.000126486	0.103672	0.302007	128.853	-0.488897
0.000828643	0.000159986	0.103412	0.378205	128.564	-0.570565
0.000828643	0.000202359	0.103089	0.472536	128.207	-0.641819
0.000828643	0.000255955	0.102691	0.588643	127.766	-0.702919
0.000828643	0.000323746	0.102202	0.730734	127.227	-0.754598
0.000828643	0.000409492	0.101606	0.903345	126.571	-0.797789
0.000828643	0.000517947	0.100884	1.11153	125.778	-0.833581
0.000828643	0.000655129	0.100018	1.35991	124.831	-0.862982
0.000828643	0.000828643	0.0989891	1.65352	123.709	-0.887032
0.000828643	0.00104811	0.0977784	1.99621	122.397	-0.90661
0.000828643	0.00132571	0.0963713	2.39117	120.879	-0.922517
0.000828643	0.00167683	0.0947559	2.84018	119.147	-0.935429
0.000828643	0.00212095	0.0929253	3.34313	117.2	-0.945912
0.000828643	0.0026827	0.0908787	3.89834	115.039	-0.954438
0.000828643	0.00339322	0.0886239	4.50101	112.681	-0.961381
0.000828643	0.00429193	0.0861738	5.14506	110.143	-0.967054
0.000828643	0.00542868	0.0835524	5.82115	107.46	-0.9717
0.000828643	0.00686649	0.0807891	6.51839	104.669	-0.975515
0.000828643	0.00868511	0.0779213	7.22393	101.817	-0.978657
0.000828643	0.0109854	0.074992	7.92334	98.958	-0.981248
0.000828643	0.013895	0.0720485	8.60125	96.1519	-0.983386
0.000828643	0.0175751	0.0691393	9.24202	93.4606	-0.985149
0.000828643	0.02223	0.0663131	9.83055	90.9457	-0.986599
0.000828643	0.0281177	0.0636103	10.3537	88.6638	-0.987788
0.000828643	0.0355648	0.0610656	10.8018	86.6584	-0.988757
0.000828643	0.0449843	0.0586972	11.1709	84.954	-0.989546
0.000828643	0.0568987	0.0565073	11.4632	83.5507	-0.990189
0.000828643	0.0719686	0.0544834	11.6873	82.4246	-0.99072
0.000828643	0.0910298	0.0526032	11.8562	81.5354	-0.991166
0.000828643	0.11514	0.0508416	11.9842	80.8368	-0.991551
0.000828643	0.145635	0.0491751	12.085	80.2852	-0.991895
0.000828643	0.184207	0.0475857	12.1704	79.8448	-0.992211
0.000828643	0.232995	0.0460603	12.25	79.4886	-0.992508
0.000828643	0.294705	0.0445905	12.3319	79.1969	-0.992794
0.000828643	0.372759	0.043171	12.423	78.956	-0.993074
0.000828643	0.471487	0.0417989	12.5301	78.7559	-0.99335
0.000828643	0.596362	0.0404735	12.6604	78.5892	-0.993627
0.000828643	0.754312	0.0391948	12.8217	78.4506	-0.993905
0.000828643	0.954095	0.0379636	13.0236	78.3357	-0.994187
0.000828643	1.20679	0.0367819	13.2776	78.2409	-0.994475
0.000828643	1.52642	0.0356511	13.598	78.1632	-0.99477
0.000828643	1.9307	0.0345741	14.0027	78.1001	-0.995074
0.000828643	2.44205	0.0335533	14.5143	78.0493	-0.995387
0.000828643	3.08884	0.0325903	15.1612	78.0088	-0.99571
0.000828643	3.90694	0.0316874	15.9793	77.977	-0.996042
0.000828643	4.94171	0.030846	17.0141	77.9523	-0.996381
0.000828643	6.25055	0.0300669	18.323	77.9333	-0.996723
0.000828643	7.90604	0.0293502	19.9785	77.919	-0.997066
0.000828643	10	0.028695	22.0724	77.9082	-0.997403
0.00104811	0.0001	0.131368	0.240664	129.059	-0.293781
0.00104811	0.000126486	0.131104	0.301974	128.827	-0.394549
0.00104811	0.000159986	0.130774	0.378167	128.539	-0.486092
0.00104811	0.000202359	0.130367	0.47245	128.181	-0.567475
0.00104811	0.000255955	0.129863	0.588539	127.741	-0.638467
0.00104811	0.000323746	0.129245	0.730552	127.202	-0.69936
0.00104811	0.000409492	0.128491	0.903262	126.546	-0.750927
0.00104811	0.000517947	0.127579	1.11133	125.754	-0.794047
0.00104811	0.000655129	0.126484	1.35968	124.807	-0.829785
0.00104811	0.000828643	0.125182	1.65325	123.686	-0.859222
0.00104811	0.00104811	0.123652	1.99577	122.374	-0.883315
0.00104811	0.00132571	0.121873	2.39068	120.857	-0.902989
0.00104811	0.00167683	0.11983	2.83977	119.126	-0.919023
0.00104811	0.00212095	0.117515	3.34267	117.179	-0.932076
0.00104811	0.0026827	0.114927	3.89783	115.019	-0.942719
0.00104811	0.00339322	0.112076	4.50059	112.66	-0.951405
0.00104811	0.00429193	0.108979	5.14434	110.125	-0.95851
0.00104811	0.00542868	0.105664	5.82043	107.442	-0.964339
0.00104811	0.00686649	0.10217	6.5177	104.651	-0.969132
0.00104811	0.00868511	0.0985428	7.22331	101.8	-0.973083
0.00104811	0.0109854	0.0948386	7.92273	98.9416	-0.976342
0.00104811	0.013895	0.0911162	8.60069	96.1361	-0.979034
0.00104811	0.0175751	0.0874374	9.24148	93.4454	-0.981255
0.00104811	0.02223	0.0838626	9.83006	90.9311	-0.983082
0.00104811	0.0281177	0.0804455	10.3533	88.6495	-0.98458
0.00104811	0.0355648	0.0772275	10.8015	86.6445	-0.985802
0.00104811	0.0449843	0.0742323	11.1706	84.9405	-0.986797
0.00104811	0.0568987	0.0714629	11.463	83.5374	-0.987609
0.00104811	0.0719686	0.0689035	11.6872	82.4116	-0.988278
0.00104811	0.0910298	0.0665259	11.8561	81.5228	-0.98884
0.00104811	0.11514	0.0642982	11.9842	80.8245	-0.989327
0.00104811	0.145635	0.0621907	12.085	80.2732	-0.98976
0.00104811	0.184207	0.0601809	12.1704	79.8332	-0.990159
0.00104811	0.232995	0.058252	12.25	79.4773	-0.990534
0.00104811	0.294705	0.0563933	12.3319	79.186	-0.990896
0.00104811	0.372759	0.0545982	12.423	78.9454	-0.991249
0.00104811	0.471487	0.0528633	12.5301	78.7456	-0.991598
0.00104811	0.596362	0.0511872	12.6604	78.5794	-0.991946
0.00104811	0.754312	0.0495701	12.8217	78.4411	-0.992298
0.00104811	0.954095	0.0480132	13.0236	78.3265	-0.992654
0.00104811	1.20679	0.0465188	13.2776	78.2319	-0.993017
0.00104811	1.52642	0.0450889	13.598	78.1545	-0.99339
0.00104811	1.9307	0.043727	14.0027	78.0917	-0.993774
0.00104811	2.44205	0.042436	14.5143	78.0411	-0.99417
0.00104811	3.08884	0.0412182	15.1612	78.0009	-0.994577
0.00104811	3.90694	0.0400763	15.9793	77.9693	-0.994997
0.00104811	4.94171	0.0390122	17.0141	77.9448	-0.995425
0.00104811	6.25055	0.038027	18.323	77.926	-0.995858
0.00104811	7.90604	0.0371206	19.9785	77.9119	-0.996291
0.00104811	10	0.036292	22.0724	77.9013	-0.996717
0.00132571	0.0001	0.166118	0.240605	129.027	-0.183139
0.00132571	0.000126486	0.165784	0.301877	128.795	-0.291008
0.00132571	0.000159986	0.165368	0.378074	128.507	-0.391405
0.00132571	0.000202359	0.164852	0.472299	128.15	-0.482534
0.00132571	0.000255955	0.164216	0.588349	127.71	-0.563584
0.00132571	0.000323746	0.163435	0.730444	127.171	-0.634325
0.00132571	0.000409492	0.162482	0.902983	126.515	-0.695003
0.00132571	0.000517947	0.161328	1.11101	125.724	-0.746407
0.00132571	0.000655129	0.159944	1.35948	124.777	-0.789467
0.00132571	0.000828643	0.158299	1.65279	123.657	-0.825189
0.00132571	0.00104811	0.156364	1.99536	122.345	-0.854662
0.00132571	0.00132571	0.154115	2.39021	120.829	-0.878855
0.00132571	0.00167683	0.151532	2.83913	119.098	-0.898664
0.00132571	0.00212095	0.148604	3.34221	117.151	-0.91486
0.00132571	0.0026827	0.145333	3.89719	114.993	-0.928098
0.00132571	0.00339322	0.141728	4.4998	112.635	-0.93893
0.00132571	0.00429193	0.137811	5.14374	110.1	-0.947814
0.00132571	0.00542868	0.13362	5.81977	107.418	-0.955111
0.00132571	0.00686649	0.129202	6.51698	104.628	-0.96112
0.00132571	0.00868511	0.124617	7.22249	101.778	-0.966077
0.00132571	0.0109854	0.119933	7.92195	98.921	-0.970173
0.00132571	0.013895	0.115226	8.59995	96.1162	-0.973557
0.00132571	0.0175751	0.110575	9.24079	93.4262	-0.976351
0.00132571	0.02223	0.106053	9.82945	90.9126	-0.978652
0.00132571	0.0281177	0.101732	10.3527	88.6315	-0.980538
0.00132571	0.0355648	0.0976633	10.8011	86.6269	-0.982078
0.00132571	0.0449843	0.0938754	11.1703	84.9233	-0.983332
0.00132571	0.0568987	0.0903733	11.4628	83.5207	-0.984355
0.00132571	0.0719686	0.0871369	11.687	82.3953	-0.985199
0.00132571	0.0910298	0.0841304	11.856	81.5068	-0.985908
0.00132571	0.11514	0.0813134	11.9841	80.8089	-0.986521
0.00132571	0.145635	0.0786486	12.085	80.2581	-0.987068
0.00132571	0.184207	0.0761072	12.1704	79.8185	-0.987571
0.00132571	0.232995	0.0736682	12.25	79.463	-0.988044
0.00132571	0.294705	0.0713179	12.3318	79.1722	-0.9885
0.00132571	0.372759	0.069048	12.423	78.9321	-0.988945
0.00132571	0.471487	0.0668542	12.5301	78.7327	-0.989386
0.00132571	0.596362	0.0647348	12.6604	78.5669	-0.989826
0.00132571	0.754312	0.06269	12.8217	78.429	-0.990269
0.00132571	0.954095	0.0607213	13.0236	78.3148	-0.990718
0.00132571	1.20679	0.0588316	13.2776	78.2206	-0.991177
0.00132571	1.52642	0.0570234	13.598	78.1435	-0.991648
0.00132571	1.9307	0.0553011	14.0027	78.081	-0.992132
0.00132571	2.44205	0.0536687	14.5143	78.0308	-0.992632
0.00132571	3.08884	0.0521288	15.1612	77.9909	-0.993147
0.00132571	3.90694	0.0506848	15.9793	77.9596	-0.993676
0.00132571	4.94171	0.0493392	17.0141	77.9353	-0.994217
0.00132571	6.25055	0.0480933	18.323	77.9168	-0.994764
0.00132571	7.90604	0.0469471	19.9785	77.9029	-0.995311
0.00132571	10	0.0458993	22.0724	77.8925	-0.99585
0.00167683	0.0001	0.210047	0.240528	128.986	-0.0676505
0.00167683	0.000126486	0.209624	0.301784	128.755	-0.180208
0.00167683	0.000159986	0.209099	0.377964	128.466	-0.287644
0.00167683	0.000202359	0.208447	0.472156	128.11	-0.387465
0.00167683	0.000255955	0.207642	0.588226	127.67	-0.478199
0.00167683	0.000323746	0.206655	0.730226	127.131	-0.558845
0.00167683	0.000409492	0.20545	0.902791	126.476	-0.629232
0.00167683	0.000517947	0.203992	1.11077	125.685	-0.689691
0.00167683	0.000655129	0.202242	1.35911	124.739	-0.740939
0.00167683	0.000828643	0.200162	1.65236	123.619	-0.783903
0.00167683	0.00104811	0.197716	1.99497	122.308	-0.819659
0.00167683	0.00132571	0.194872	2.38976	120.792	-0.849207
0.00167683	0.00167683	0.191607	2.83859	119.063	-0.873535
0.00167683	0.00212095	0.187907	3.34147	117.117	-0.893518
0.00167683	0.0026827	0.183771	3.89638	114.96	-0.909919
0.00167683	0.00339322	0.179214	4.4989	112.603	-0.923382
0.00167683	0.00429193	0.174262	5.1428	110.069	-0.934452
0.00167683	0.00542868	0.168963	5.81878	107.388	-0.943564
0.00167683	0.00686649	0.163377	6.51599	104.6	-0.95108
0.00167683	0.00868511	0.15758	7.22147	101.751	-0.95729
0.00167683	0.0109854	0.151658	7.92098	98.8948	-0.962427
0.00167683	0.013895	0.145707	8.59901	96.0912	-0.966676
0.00167683	0.0175751	0.139825	9.23994	93.402	-0.970186
0.00167683	0.02223	0.134109	9.82868	90.8891	-0.973078
0.00167683	0.0281177	0.128645	10.3521	88.6087	-0.975451
0.00167683	0.0355648	0.123499	10.8005	86.6047	-0.977389
0.00167683	0.0449843	0.11871	11.1699	84.9016	-0.978968
0.00167683	0.0568987	0.114282	11.4625	83.4995	-0.980257
0.00167683	0.0719686	0.11019	11.6868	82.3746	-0.981319
0.00167683	0.0910298	0.106388	11.8559	81.4866	-0.982213
0.00167683	0.11514	0.102826	11.984	80.7893	-0.982985
0.00167683	0.145635	0.0994572	12.0849	80.2389	-0.983675
0.00167683	0.184207	0.0962438	12.1703	79.7999	-0.984308
0.00167683	0.232995	0.0931601	12.25	79.4451	-0.984905
0.00167683	0.294705	0.0901884	12.3318	79.1548	-0.985479
0.00167683	0.372759	0.0873185	12.423	78.9152	-0.986041
0.00167683	0.471487	0.0845447	12.5301	78.7164	-0.986596
0.00167683	0.596362	0.081865	12.6604	78.551	-0.987151
0.00167683	0.754312	0.0792795	12.8217	78.4137	-0.98771
0.00167683	0.954095	0.0767902	13.0236	78.2999	-0.988277
0.00167683	1.20679	0.0744008	13.2776	78.2063	-0.988856
0.00167683	1.52642	0.0721144	13.598	78.1297	-0.989449
0.00167683	1.9307	0.0699367	14.0027	78.0676	-0.990061
0.00167683	2.44205	0.0678726	14.5143	78.0178	-0.990691
0.00167683	3.08884	0.0659254	15.1612	77.9782	-0.991341
0.00167683	3.90694	0.0640996	15.9793	77.9473	-0.992009
0.00167683	4.94171	0.0623981	17.0141	77.9234	-0.992692
0.00167683	6.25055	0.0608226	18.323	77.9052	-0.993383
0.00167683	7.90604	0.0593732	19.9785	77.8915	-0.994074
0.00167683	10	0.0580483	22.0724	77.8814	-0.994754
0.00212095	0.0001	0.26557	0.240439	128.935	0.0496635
0.00212095	0.000126486	0.265035	0.301672	128.703	-0.0646483
0.00212095	0.000159986	0.26437	0.377786	128.415	-0.176617
0.00212095	0.000202359	0.263547	0.472016	128.059	-0.283414
0.00212095	0.000255955	0.26253	0.587957	127.619	-0.382636
0.00212095	0.000323746	0.261282	0.729957	127.081	-0.472817
0.00212095	0.000409492	0.259759	0.902401	126.426	-0.552971
0.00212095	0.000517947	0.257917	1.11039	125.636	-0.623012
0.00212095	0.000655129	0.255705	1.35864	124.69	-0.683209
0.00212095	0.000828643	0.253076	1.65191	123.571	-0.734301
0.00212095	0.00104811	0.249984	1.99433	122.261	-0.777228
0.00212095	0.00132571	0.246391	2.3889	120.747	-0.813007
0.00212095	0.00167683	0.242264	2.83763	119.019	-0.842681
0.00212095	0.00212095	0.237586	3.34055	117.074	-0.867201
0.00212095	0.0026827	0.23236	3.89523	114.918	-0.887412
0.00212095	0.00339322	0.226597	4.49793	112.563	-0.904076
0.00212095	0.00429193	0.220338	5.14161	110.03	-0.917814
0.00212095	0.00542868	0.21364	5.81746	107.352	-0.929154
0.00212095	0.00686649	0.206578	6.51473	104.564	-0.93853
0.00212095	0.00868511	0.199249	7.22022	101.717	-0.94629
0.00212095	0.0109854	0.191762	7.91975	98.8617	-0.952719
0.00212095	0.013895	0.18424	8.5978	96.0594	-0.958042
0.00212095	0.0175751	0.176802	9.23886	93.3713	-0.962445
0.00212095	0.02223	0.169575	9.82771	90.8594	-0.966076
0.00212095	0.0281177	0.162668	10.3512	88.5799	-0.969057
0.00212095	0.0355648	0.156161	10.7998	86.5767	-0.971493
0.00212095	0.0449843	0.150106	11.1694	84.8742	-0.973478
0.00212095	0.0568987	0.144507	11.4621	83.4726	-0.975099
0.00212095	0.0719686	0.139333	11.6865	82.3484	-0.976436
0.00212095	0.0910298	0.134527	11.8557	81.461	-0.977561
0.00212095	0.11514	0.130023	11.9838	80.7644	-0.978533
0.00212095	0.145635	0.125764	12.0848	80.2148	-0.979401
0.00212095	0.184207	0.121701	12.1703	79.7764	-0.980198
0.00212095	0.232995	0.117803	12.2499	79.4223	-0.98095
0.00212095	0.294705	0.114046	12.3318	79.1328	-0.981673
0.00212095	0.372759	0.110418	12.4229	78.8939	-0.98238
0.00212095	0.471487	0.106911	12.5301	78.6957	-0.98308
0.00212095	0.596362	0.103523	12.6604	78.5311	-0.983779
0.00212095	0.754312	0.100254	12.8217	78.3943	-0.984483
0.00212095	0.954095	0.0971071	13.0236	78.2812	-0.985198
0.00212095	1.20679	0.094086	13.2776	78.1882	-0.985928
0.00212095	1.52642	0.0911955	13.598	78.1121	-0.986676
0.00212095	1.9307	0.0884419	14.0027	78.0506	-0.987447
0.00212095	2.44205	0.0858323	14.5143	78.0013	-0.988242
0.00212095	3.08884	0.0833702	15.1612	77.9622	-0.989062
0.00212095	3.90694	0.0810615	15.9793	77.9317	-0.989905
0.00212095	4.94171	0.0789102	17.0141	77.9083	-0.990767
0.00212095	6.25055	0.0769182	18.323	77.8905	-0.991639
0.00212095	7.90604	0.0750856	19.9785	77.8772	-0.992511
0.00212095	10	0.0734103	22.0724	77.8674	-0.99337
0.0026827	0.0001	0.335732	0.24032	128.87	0.165631
0.0026827	0.000126486	0.335057	0.301547	128.638	0.0526386
0.0026827	0.000159986	0.334217	0.377631	128.351	-0.0609884
0.0026827	0.000202359	0.333176	0.471758	127.995	-0.172166
0.0026827	0.000255955	0.331891	0.587728	127.556	-0.278198
0.0026827	0.000323746	0.330314	0.729625	127.018	-0.37673
0.0026827	0.000409492	0.32839	0.902063	126.364	-0.466229
0.0026827	0.000517947	0.326062	1.10981	125.574	-0.545836
0.0026827	0.000655129	0.323268	1.35805	124.629	-0.615458
0.0026827	0.000828643	0.319945	1.65112	123.512	-0.675358
0.0026827	0.00104811	0.316038	1.99341	122.203	-0.726308
0.0026827	0.00132571	0.311495	2.38809	120.689	-0.769227
0.0026827	0.00167683	0.30628	2.8367	118.962	-0.805102
0.0026827	0.00212095	0.300371	3.33924	117.02	-0.834943
0.0026827	0.0026827	0.293763	3.89406	114.865	-0.859706
0.0026827	0.00339322	0.286481	4.49651	112.512	-0.880209
0.0026827	0.00429193	0.278572	5.13998	109.982	-0.897178
0.0026827	0.00542868	0.270104	5.81602	107.304	-0.91124
0.0026827	0.00686649	0.261178	6.51315	104.519	-0.922892
0.0026827	0.00868511	0.251915	7.21865	101.673	-0.932558
0.0026827	0.0109854	0.242451	7.91819	98.82	-0.940581
0.0026827	0.013895	0.232939	8.59636	96.0191	-0.947235
0.0026827	0.0175751	0.223539	9.23748	93.3326	-0.952745
0.0026827	0.02223	0.214404	9.82648	90.8219	-0.957294
0.0026827	0.0281177	0.20567	10.3502	88.5435	-0.961032
0.0026827	0.0355648	0.197445	10.799	86.5412	-0.964089
0.0026827	0.0449843	0.189789	11.1687	84.8396	-0.966582
0.0026827	0.0568987	0.182711	11.4616	83.4388	-0.968618
0.0026827	0.0719686	0.17617	11.6862	82.3153	-0.970298
0.0026827	0.0910298	0.170094	11.8554	81.4287	-0.971711
0.0026827	0.11514	0.164401	11.9837	80.7329	-0.972934
0.0026827	0.145635	0.159017	12.0847	80.1842	-0.974025
0.0026827	0.184207	0.153882	12.1702	79.7468	-0.975028
0.0026827	0.232995	0.148953	12.2499	79.3935	-0.975973
0.0026827	0.294705	0.144205	12.3318	79.1049	-0.976883
0.0026827	0.372759	0.139618	12.4229	78.8669	-0.977772
0.0026827	0.471487	0.135185	12.5301	78.6696	-0.978653
0.0026827	0.596362	0.130902	12.6604	78.5058	-0.979533
0.0026827	0.754312	0.12677	12.8217	78.3699	-0.980419
0.0026827	0.954095	0.122792	13.0236	78.2576	-0.981319
0.0026827	1.20679	0.118973	13.2776	78.1653	-0.982238
0.0026827	1.52642	0.115318	13.598	78.09	-0.983182
0.0026827	1.9307	0.111838	14.0027	78.0291	-0.984153
0.0026827	2.44205	0.108538	14.5143	77.9804	-0.985155
0.0026827	3.08884	0.105426	15.1612	77.942	-0.986189
0.0026827	3.90694	0.102507	15.9793	77.9121	-0.987252
0.0026827	4.94171	0.0997871	17.0141	77.8892	-0.988338
0.0026827	6.25055	0.0972687	18.323	77.8718	-0.989439
0.0026827	7.90604	0.0949518	19.9785	77.859	-0.99054
0.0026827	10	0.0928337	22.0724	77.8496	-0.991623
0.00339322	0.0001	0.424372	0.24017	128.788	0.277186
0.00339322	0.000126486	0.423519	0.301335	128.557	0.168564
0.00339322	0.000159986	0.422459	0.377403	128.269	0.0563296
0.00339322	0.000202359	0.421143	0.471473	127.914	-0.0563847
0.00339322	0.000255955	0.419521	0.587374	127.475	-0.166703
0.00339322	0.000323746	0.417529	0.729188	126.938	-0.271784
0.00339322	0.000409492	0.415098	0.901533	126.285	-0.369454
0.00339322	0.000517947	0.412157	1.10927	125.496	-0.458196
0.00339322	0.000655129	0.408625	1.3573	124.552	-0.53721
0.00339322	0.000828643	0.404429	1.65024	123.436	-0.606331
0.00339322	0.00104811	0.399493	1.99239	122.129	-0.665959
0.00339322	0.00132571	0.393754	2.38692	120.617	-0.716792
0.00339322	0.00167683	0.387166	2.83525	118.892	-0.759704
0.00339322	0.00212095	0.379698	3.33775	116.951	-0.795721
0.00339322	0.0026827	0.371349	3.89242	114.799	-0.825812
0.00339322	0.00339322	0.362147	4.49475	112.447	-0.850873
0.00339322	0.00429193	0.352153	5.13813	109.92	-0.871718
0.00339322	0.00542868	0.341453	5.81394	107.245	-0.889056
0.00339322	0.00686649	0.330173	6.51107	104.462	-0.903476
0.00339322	0.00868511	0.318467	7.21658	101.618	-0.915471
0.00339322	0.0109854	0.306504	7.9162	98.7673	-0.925449
0.00339322	0.013895	0.294482	8.59447	95.9684	-0.933742
0.00339322	0.0175751	0.282601	9.23574	93.2837	-0.94062
0.00339322	0.02223	0.271054	9.82493	90.7746	-0.946304
0.00339322	0.0281177	0.260015	10.3488	88.4975	-0.950982
0.00339322	0.0355648	0.249618	10.7979	86.4963	-0.95481
0.00339322	0.0449843	0.239939	11.1678	84.7958	-0.957934
0.00339322	0.0568987	0.230992	11.4609	83.3959	-0.960487
0.00339322	0.0719686	0.222724	11.6857	82.2734	-0.962594
0.00339322	0.0910298	0.215044	11.8551	81.3879	-0.964368
0.00339322	0.11514	0.207849	11.9835	80.6931	-0.965902
0.00339322	0.145635	0.201044	12.0846	80.1456	-0.967272
0.00339322	0.184207	0.194553	12.1701	79.7093	-0.968531
0.00339322	0.232995	0.188325	12.2499	79.3572	-0.969718
0.00339322	0.294705	0.182323	12.3318	79.0697	-0.970861
0.00339322	0.372759	0.176526	12.4229	78.8328	-0.971979
0.00339322	0.471487	0.170923	12.5301	78.6366	-0.973085
0.00339322	0.596362	0.16551	12.6604	78.4739	-0.974191
0.00339322	0.754312	0.160287	12.8217	78.339	-0.975306
0.00339322	0.954095	0.155259	13.0236	78.2277	-0.976438
0.00339322	1.20679	0.150431	13.2776	78.1363	-0.977594
0.00339322	1.52642	0.145812	13.598	78.0619	-0.978781
0.00339322	1.9307	0.141412	14.0027	78.0019	-0.980004
0.00339322	2.44205	0.137242	14.5143	77.9541	-0.981266
0.00339322	3.08884	0.133307	15.1612	77.9164	-0.982568
0.00339322	3.90694	0.129618	15.9793	77.8873	-0.983907
0.00339322	4.94171	0.12618	17.0141	77.865	-0.985277
0.00339322	6.25055	0.122996	18.323	77.8483	-0.986664
0.00339322	7.90604	0.120067	19.9785	77.836	-0.988052
0.00339322	10	0.11739	22.0724	77.8272	-0.98942
0.00429193	0.0001	0.536321	0.239979	128.684	0.381737
0.00429193	0.000126486	0.535245	0.3011	128.453	0.279962
0.00429193	0.000159986	0.533907	0.377111	128.166	0.172111
0.00429193	0.000202359	0.532246	0.471147	127.811	0.0608926
0.00429193	0.000255955	0.530196	0.586935	127.373	-0.0507903
0.00429193	0.000323746	0.527679	0.72859	126.837	-0.159926
0.00429193	0.000409492	0.524611	0.900812	126.185	-0.263923
0.00429193	0.000517947	0.520896	1.1084	125.397	-0.360588
0.00429193	0.000655129	0.516437	1.35636	124.455	-0.448487
0.00429193	0.000828643	0.511137	1.64913	123.34	-0.526784
0.00429193	0.00104811	0.504901	1.9912	122.034	-0.595448
0.00429193	0.00132571	0.497653	2.38543	120.525	-0.654777
0.00429193	0.00167683	0.489335	2.83356	118.803	-0.705477
0.00429193	0.00212095	0.479899	3.33587	116.865	-0.748465
0.00429193	0.0026827	0.469352	3.89036	114.714	-0.784687
0.00429193	0.00339322	0.457728	4.49251	112.366	-0.815068
0.00429193	0.00429193	0.4451	5.13587	109.841	-0.840494
0.00429193	0.00542868	0.431583	5.81158	107.169	-0.861742
0.00429193	0.00686649	0.417332	6.5086	104.389	-0.879487
0.00429193	0.00868511	0.402539	7.21412	101.549	-0.8943
0.00429193	0.0109854	0.387426	7.91373	98.7005	-0.906657
0.00429193	0.013895	0.372235	8.59211	95.9043	-0.916952
0.00429193	0.0175751	0.35722	9.23354	93.2218	-0.925508
0.00429193	0.02223	0.342626	9.82296	90.7148	-0.932591
0.00429193	0.0281177	0.328675	10.3472	88.4394	-0.938426
0.00429193	0.0355648	0.315534	10.7965	86.4397	-0.943209
0.00429193	0.0449843	0.303303	11.1667	84.7404	-0.947114
0.00429193	0.0568987	0.291995	11.4601	83.3418	-0.950308
0.00429193	0.0719686	0.281545	11.6852	82.2205	-0.952945
0.00429193	0.0910298	0.27184	11.8547	81.3363	-0.955166
0.00429193	0.11514	0.262748	11.9832	80.643	-0.957088
0.00429193	0.145635	0.254148	12.0844	80.0968	-0.958804
0.00429193	0.184207	0.245947	12.17	79.6619	-0.960382
0.00429193	0.232995	0.238076	12.2498	79.3113	-0.961871
0.00429193	0.294705	0.230492	12.3317	79.0252	-0.963304
0.00429193	0.372759	0.223167	12.4229	78.7897	-0.964706
0.00429193	0.471487	0.216087	12.5301	78.5949	-0.966094
0.00429193	0.596362	0.209247	12.6603	78.4335	-0.967482
0.00429193	0.754312	0.202646	12.8217	78.3	-0.968882
0.00429193	0.954095	0.196292	13.0236	78.1899	-0.970304
0.00429193	1.20679	0.190191	13.2776	78.0997	-0.971756
0.00429193	1.52642	0.184354	13.598	78.0265	-0.973248
0.00429193	1.9307	0.178793	14.0027	77.9676	-0.974785
0.00429193	2.44205	0.173522	14.5143	77.9208	-0.976372
0.00429193	3.08884	0.16855	15.1612	77.8841	-0.97801
0.00429193	3.90694	0.163886	15.9793	77.8559	-0.979696
0.00429193	4.94171	0.159541	17.0141	77.8344	-0.98142
0.00429193	6.25055	0.155517	18.323	77.8186	-0.983168
0.00429193	7.90604	0.151815	19.9785	77.807	-0.984917
0.00429193	10	0.14843	22.0724	77.7989	-0.98664
0.00542868	0.0001	0.677656	0.239746	128.553	0.477336
0.00542868	0.000126486	0.676296	0.300804	128.323	0.384293
0.00542868	0.000159986	0.674607	0.376743	128.036	0.283315
0.00542868	0.000202359	0.672509	0.47065	127.682	0.17658
0.00542868	0.000255955	0.669923	0.586378	127.245	0.066501
0.00542868	0.000323746	0.666747	0.727962	126.71	-0.0438909
0.00542868	0.000409492	0.662873	0.899979	126.059	-0.151713
0.00542868	0.000517947	0.658184	1.10748	125.273	-0.254462
0.00542868	0.000655129	0.652554	1.35508	124.333	-0.349928
0.00542868	0.000828643	0.645864	1.64782	123.219	-0.436833
0.00542868	0.00104811	0.637991	1.98959	121.916	-0.514389
0.00542868	0.00132571	0.628842	2.38344	120.41	-0.582481
0.00542868	0.00167683	0.618333	2.83143	118.69	-0.641522
0.00542868	0.00212095	0.606422	3.3335	116.755	-0.692165
0.00542868	0.0026827	0.593103	3.88775	114.608	-0.735272
0.00542868	0.00339322	0.578427	4.48957	112.264	-0.771734
0.00542868	0.00429193	0.562476	5.13286	109.742	-0.802479
0.00542868	0.00542868	0.545404	5.80844	107.074	-0.828323
0.00542868	0.00686649	0.527404	6.5054	104.298	-0.850016
0.00542868	0.00868511	0.50872	7.21087	101.461	-0.8682
0.00542868	0.0109854	0.489627	7.91058	98.6164	-0.883425
0.00542868	0.013895	0.470436	8.58909	95.8233	-0.896146
0.00542868	0.0175751	0.451465	9.23076	93.1437	-0.906744
0.00542868	0.02223	0.433026	9.82048	90.6392	-0.915536
0.00542868	0.0281177	0.415399	10.345	88.366	-0.922791
0.00542868	0.0355648	0.398794	10.7948	86.3682	-0.928746
0.00542868	0.0449843	0.383337	11.1654	84.6706	-0.933614
0.00542868	0.0568987	0.369048	11.4591	83.2735	-0.937598
0.00542868	0.0719686	0.355845	11.6844	82.1537	-0.940891
0.00542868	0.0910298	0.343583	11.8542	81.2711	-0.943665
0.00542868	0.11514	0.332095	11.9829	80.5795	-0.946067
0.00542868	0.145635	0.321232	12.0842	80.035	-0.948211
0.00542868	0.184207	0.310871	12.1699	79.602	-0.950184
0.00542868	0.232995	0.300928	12.2497	79.2532	-0.952046
0.00542868	0.294705	0.291347	12.3317	78.969	-0.953839
0.00542868	0.372759	0.282093	12.4229	78.7353	-0.955593
0.00542868	0.471487	0.273149	12.53	78.5423	-0.957331
0.00542868	0.596362	0.264507	12.6603	78.3825	-0.95907
0.00542868	0.754312	0.256169	12.8217	78.2506	-0.960824
0.00542868	0.954095	0.24814	13.0236	78.1421	-0.962606
0.00542868	1.20679	0.240432	13.2776	78.0535	-0.964428
0.00542868	1.52642	0.233056	13.598	77.9817	-0.9663
0.00542868	1.9307	0.22603	14.0027	77.9242	-0.968229
0.00542868	2.44205	0.21937	14.5143	77.8787	-0.970222
0.00542868	3.08884	0.213086	15.1612	77.8433	-0.97228
0.00542868	3.90694	0.207194	15.9793	77.8162	-0.974399
0.00542868	4.94171	0.201703	17.0141	77.7959	-0.976568
0.00542868	6.25055	0.196618	18.323	77.781	-0.978767
0.00542868	7.90604	0.191939	19.9785	77.7704	-0.980968
0.00542868	10	0.187662	22.0724	77.763	-0.983139
0.00686649	0.0001	0.855997	0.239443	128.388	0.562836
0.00686649	0.000126486	0.854281	0.300429	128.158	0.479646
0.00686649	0.000159986	0.852151	0.376279	127.872	0.387382
0.00686649	0.000202359	0.849508	0.470072	127.519	0.287543
0.00686649	0.000255955	0.84624	0.585626	127.083	0.18201
0.00686649	0.000323746	0.842235	0.7271	126.549	0.0733657
0.00686649	0.000409492	0.837346	0.898938	125.9	-0.0354733
0.00686649	0.000517947	0.831431	1.10614	125.116	-0.14178
0.00686649	0.000655129	0.824328	1.35367	124.177	-0.243042
0.00686649	0.000828643	0.815885	1.64596	123.067	-0.337177
0.00686649	0.00104811	0.805953	1.98741	121.767	-0.422951
0.00686649	0.00132571	0.794404	2.38107	120.264	-0.499663
0.00686649	0.00167683	0.781139	2.82888	118.547	-0.567238
0.00686649	0.00212095	0.766106	3.33063	116.616	-0.625991
0.00686649	0.0026827	0.749298	3.88445	114.474	-0.676591
0.00686649	0.00339322	0.730771	4.486	112.135	-0.719838
0.00686649	0.00429193	0.710635	5.12907	109.617	-0.75662
0.00686649	0.00542868	0.689081	5.80449	106.954	-0.787765
0.00686649	0.00686649	0.666355	6.50135	104.183	-0.814067
0.00686649	0.00868511	0.642762	7.20681	101.35	-0.83623
0.00686649	0.0109854	0.618652	7.9066	98.5101	-0.854866
0.00686649	0.013895	0.594414	8.58531	95.7211	-0.870494
0.00686649	0.0175751	0.570453	9.22725	93.0452	-0.883554
0.00686649	0.02223	0.547162	9.81733	90.5439	-0.894416
0.00686649	0.0281177	0.524892	10.3423	88.2734	-0.903399
0.00686649	0.0355648	0.503918	10.7925	86.2779	-0.910783
0.00686649	0.0449843	0.484392	11.1636	84.5824	-0.916829
0.00686649	0.0568987	0.466341	11.4578	83.1873	-0.921782
0.00686649	0.0719686	0.449663	11.6835	82.0695	-0.925879
0.00686649	0.0910298	0.434174	11.8536	81.1889	-0.929332
0.00686649	0.11514	0.419666	11.9825	80.4994	-0.932324
0.00686649	0.145635	0.405947	12.084	79.9571	-0.934996
0.00686649	0.184207	0.392862	12.1697	79.5265	-0.937455
0.00686649	0.232995	0.380305	12.2496	79.1799	-0.939777
0.00686649	0.294705	0.368205	12.3316	78.898	-0.942014
0.00686649	0.372759	0.35652	12.4228	78.6665	-0.944204
0.00686649	0.471487	0.345223	12.53	78.4757	-0.946374
0.00686649	0.596362	0.334309	12.6603	78.3181	-0.948547
0.00686649	0.754312	0.323776	12.8217	78.1883	-0.950739
0.00686649	0.954095	0.313636	13.0236	78.0818	-0.952968
0.00686649	1.20679	0.3039	13.2776	77.9951	-0.955248
0.00686649	1.52642	0.294583	13.598	77.9251	-0.957591
0.00686649	1.9307	0.285708	14.0027	77.8694	-0.960008
0.00686649	2.44205	0.277295	14.5143	77.8256	-0.962506
0.00686649	3.08884	0.269357	15.1612	77.7917	-0.965088
0.00686649	3.90694	0.261913	15.9793	77.7661	-0.967747
0.00686649	4.94171	0.254975	17.0141	77.7471	-0.97047
0.00686649	6.25055	0.248551	18.323	77.7335	-0.973233
0.00686649	7.90604	0.24264	19.9785	77.724	-0.976001
0.00686649	10	0.237237	22.0724	77.7177	-0.978732
0.00868511	0.0001	1.0809	0.239065	128.179	0.63777
0.00868511	0.000126486	1.07873	0.299957	127.95	0.564866
0.00868511	0.000159986	1.07605	0.375693	127.666	0.482423
0.00868511	0.000202359	1.07271	0.469393	127.313	0.391231
0.00868511	0.000255955	1.0686	0.584771	126.879	0.292631
0.00868511	0.000323746	1.06354	0.725956	126.347	0.188649
0.00868511	0.000409492	1.05738	0.897668	125.699	0.0816944
0.00868511	0.000517947	1.04992	1.10455	124.918	-0.025356
0.00868511	0.000655129	1.04096	1.35177	123.982	-0.129897
0.00868511	0.000828643	1.03032	1.64373	122.875	-0.229394
0.00868511	0.00104811	1.0178	1.9848	121.579	-0.322055
0.00868511	0.00132571	1.00323	2.3782	120.079	-0.406625
0.00868511	0.00167683	0.986498	2.82549	118.368	-0.482423
0.00868511	0.00212095	0.967538	3.32673	116.442	-0.549382
0.00868511	0.0026827	0.946331	3.88029	114.305	-0.607871
0.00868511	0.00339322	0.922953	4.48164	111.971	-0.658456
0.00868511	0.00429193	0.897554	5.12418	109.46	-0.701895
0.00868511	0.00542868	0.870351	5.7995	106.803	-0.739019
0.00868511	0.00686649	0.84167	6.49623	104.037	-0.770597
0.00868511	0.00868511	0.811889	7.20172	101.211	-0.797372
0.00868511	0.0109854	0.781458	7.90156	98.3761	-0.820003
0.00868511	0.013895	0.750861	8.5805	95.5922	-0.839067
0.00868511	0.0175751	0.720614	9.2228	92.9208	-0.855057
0.00868511	0.02223	0.691199	9.81336	90.4236	-0.8684
0.00868511	0.0281177	0.663075	10.3389	88.1566	-0.879463
0.00868511	0.0355648	0.636588	10.7897	86.164	-0.888575
0.00868511	0.0449843	0.611928	11.1614	84.4711	-0.896049
0.00868511	0.0568987	0.589133	11.4562	83.0784	-0.902181
0.00868511	0.0719686	0.568073	11.6824	81.9631	-0.907257
0.00868511	0.0910298	0.548517	11.8528	81.0851	-0.911539
0.00868511	0.11514	0.530199	11.982	80.3982	-0.915251
0.00868511	0.145635	0.512879	12.0836	79.8589	-0.918568
0.00868511	0.184207	0.496362	12.1695	79.431	-0.921622
0.00868511	0.232995	0.480511	12.2495	79.0874	-0.924507
0.00868511	0.294705	0.465237	12.3315	78.8083	-0.927288
0.00868511	0.372759	0.450484	12.4228	78.5798	-0.930012
0.00868511	0.471487	0.436224	12.53	78.3917	-0.932714
0.00868511	0.596362	0.422445	12.6603	78.2368	-0.93542
0.00868511	0.754312	0.409148	12.8217	78.1096	-0.938152
0.00868511	0.954095	0.396345	13.0236	78.0056	-0.940932
0.00868511	1.20679	0.384052	13.2776	77.9213	-0.943777
0.00868511	1.52642	0.372288	13.598	77.8537	-0.946703
0.00868511	1.9307	0.36108	14.0027	77.8002	-0.949724
0.00868511	2.44205	0.350456	14.5143	77.7584	-0.952847
0.00868511	3.08884	0.340432	15.1612	77.7265	-0.956078
0.00868511	3.90694	0.331031	15.9793	77.7027	-0.959409
0.00868511	4.94171	0.322269	17.0141	77.6855	-0.962822
0.00868511	6.25055	0.314155	18.323	77.6735	-0.966287
0.00868511	7.90604	0.30669	19.9785	77.6655	-0.969762
0.00868511	10	0.299864	22.0724	77.6605	-0.973193
0.0109854	0.0001	1.36428	0.238567	127.916	0.70232
0.0109854	0.000126486	1.36156	0.299364	127.688	0.639521
0.0109854	0.000159986	1.35817	0.374955	127.405	0.567308
0.0109854	0.000202359	1.35397	0.46844	127.054	0.485912
0.0109854	0.000255955	1.34879	0.583655	126.621	0.395941
0.0109854	0.000323746	1.34243	0.724639	126.091	0.298872
0.0109854	0.000409492	1.33466	0.895955	125.446	0.196675
0.0109854	0.000517947	1.32526	1.10255	124.668	0.0917348
0.0109854	0.000655129	1.31398	1.3494	123.736	-0.0132972
0.0109854	0.000828643	1.30056	1.64102	122.633	-0.11574
0.0109854	0.00104811	1.28478	1.98152	121.341	-0.21331
0.0109854	0.00132571	1.26642	2.37443	119.847	-0.304327
0.0109854	0.00167683	1.24534	2.8211	118.142	-0.387503
0.0109854	0.00212095	1.22144	3.32194	116.222	-0.462321
0.0109854	0.0026827	1.19471	3.87492	114.092	-0.52868
0.0109854	0.00339322	1.16523	4.47584	111.765	-0.586875
0.0109854	0.00429193	1.1332	5.11825	109.262	-0.637461
0.0109854	0.00542868	1.0989	5.79309	106.612	-0.681108
0.0109854	0.00686649	1.06273	6.48968	103.854	-0.718573
0.0109854	0.00868511	1.02516	7.19521	101.035	-0.750581
0.0109854	0.0109854	0.986761	7.89524	98.207	-0.777807
0.0109854	0.013895	0.948154	8.57446	95.4296	-0.800863
0.0109854	0.0175751	0.909977	9.2172	92.7641	-0.82029
0.0109854	0.02223	0.872859	9.80834	90.2719	-0.836562
0.0109854	0.0281177	0.837366	10.3346	88.0092	-0.850095
0.0109854	0.0355648	0.803925	10.7862	86.0204	-0.861274
0.0109854	0.0449843	0.772797	11.1587	84.3307	-0.870461
0.0109854	0.0568987	0.744018	11.4541	82.9412	-0.878011
0.0109854	0.0719686	0.717437	11.6809	81.8289	-0.884269
0.0109854	0.0910298	0.692756	11.8518	80.9542	-0.889553
0.0109854	0.11514	0.669641	11.9813	80.2707	-0.894136
0.0109854	0.145635	0.647786	12.0832	79.7349	-0.898235
0.0109854	0.184207	0.626947	12.1693	79.3106	-0.902011
0.0109854	0.232995	0.606949	12.2493	78.9707	-0.905579
0.0109854	0.294705	0.587678	12.3314	78.6952	-0.909022
0.0109854	0.372759	0.569063	12.4227	78.4703	-0.912396
0.0109854	0.471487	0.55107	12.53	78.2857	-0.915745
0.0109854	0.596362	0.533682	12.6603	78.1342	-0.919102
0.0109854	0.754312	0.516902	12.8217	78.0103	-0.922495
0.0109854	0.954095	0.500745	13.0236	77.9095	-0.925949
0.0109854	1.20679	0.48523	13.2776	77.8282	-0.929487
0.0109854	1.52642	0.470382	13.598	77.7635	-0.933129
0.0109854	1.9307	0.456237	14.0027	77.7128	-0.936892
0.0109854	2.44205	0.442826	14.5143	77.6737	-0.940787
0.0109854	3.08884	0.430173	15.1612	77.6443	-0.944819
0.0109854	3.90694	0.418304	15.9793	77.6228	-0.94898
0.0109854	4.94171	0.407243	17.0141	77.6077	-0.953248
0.0109854	6.25055	0.396999	18.323	77.5977	-0.957586
0.0109854	7.90604	0.387574	19.9785	77.5915	-0.961939
0.0109854	10	0.378956	22.0724	77.5883	-0.966242
0.013895	0.0001	1.72101	0.237967	127.586	0.757049
0.013895	0.000126486	1.71759	0.298615	127.359	0.703784
0.013895	0.000159986	1.71333	0.374026	127.077	0.641626
0.013895	0.000202359	1.70804	0.467294	126.728	0.570371
0.013895	0.000255955	1.70152	0.58224	126.297	0.490104
0.013895	0.000323746	1.69351	0.722858	125.77	0.401699
0.013895	0.000409492	1.68374	0.893857	125.128	0.306442
0.013895	0.000517947	1.67191	1.10003	124.353	0.20631
0.013895	0.000655129	1.65771	1.34639	123.426	0.103631
0.013895	0.000828643	1.64082	1.63738	122.328	0.00105053
0.013895	0.00104811	1.62096	1.9774	121.042	-0.0990582
0.013895	0.00132571	1.59784	2.36969	119.554	-0.194543
0.013895	0.00167683	1.5713	2.81572	117.857	-0.283661
0.013895	0.00212095	1.54119	3.31607	115.945	-0.365408
0.013895	0.0026827	1.50752	3.86844	113.824	-0.439163
0.013895	0.00339322	1.4704	4.46866	111.506	-0.504839
0.013895	0.00429193	1.43003	5.11066	109.012	-0.562729
0.013895	0.00542868	1.38681	5.78514	106.372	-0.613268
0.013895	0.00686649	1.34121	6.48164	103.623	-0.657104
0.013895	0.00868511	1.29386	7.18704	100.813	-0.694876
0.013895	0.0109854	1.24545	7.88723	97.9941	-0.727254
0.013895	0.013895	1.19677	8.5668	95.2248	-0.75485
0.013895	0.0175751	1.14862	9.21011	92.5666	-0.778232
0.013895	0.02223	1.1018	9.80199	90.0808	-0.797906
0.013895	0.0281177	1.05701	10.3291	87.8236	-0.814333
0.013895	0.0355648	1.01483	10.7817	85.8395	-0.827945
0.013895	0.0449843	0.975549	11.1552	84.154	-0.83916
0.013895	0.0568987	0.939245	11.4515	82.7683	-0.848396
0.013895	0.0719686	0.90571	11.6791	81.6599	-0.856063
0.013895	0.0910298	0.87458	11.8506	80.7891	-0.862543
0.013895	0.11514	0.84543	11.9805	80.1099	-0.868169
0.013895	0.145635	0.817872	12.0827	79.5785	-0.873203
0.013895	0.184207	0.791595	12.1689	79.1589	-0.877845
0.013895	0.232995	0.766381	12.2491	78.8235	-0.882235
0.013895	0.294705	0.742082	12.3313	78.5526	-0.886474
0.013895	0.372759	0.718611	12.4226	78.3321	-0.890633
0.013895	0.471487	0.695921	12.5299	78.152	-0.894763
0.013895	0.596362	0.673995	12.6603	78.0048	-0.898908
0.013895	0.754312	0.652833	12.8217	77.885	-0.903101
0.013895	0.954095	0.632454	13.0236	77.7882	-0.907374
0.013895	1.20679	0.612885	13.2776	77.7108	-0.911755
0.013895	1.52642	0.594156	13.598	77.6498	-0.91627
0.013895	1.9307	0.576311	14.0027	77.6025	-0.92094
0.013895	2.44205	0.559392	14.5143	77.5667	-0.925779
0.013895	3.08884	0.543427	15.1612	77.5404	-0.930794
0.013895	3.90694	0.528453	15.9793	77.5219	-0.935975
0.013895	4.94171	0.514496	17.0141	77.5095	-0.941297
0.013895	6.25055	0.501569	18.323	77.502	-0.946711
0.013895	7.90604	0.489675	19.9785	77.4982	-0.952153
0.013895	10	0.478799	22.0724	77.4971	-0.957537
0.0175751	0.0001	2.16951	0.237233	127.17	0.802859
0.0175751	0.000126486	2.1652	0.297676	126.945	0.75827
0.0175751	0.000159986	2.15985	0.372824	126.665	0.705589
0.0175751	0.000202359	2.15322	0.465889	126.318	0.644238
0.0175751	0.000255955	2.14502	0.580466	125.89	0.574046
0.0175751	0.000323746	2.13495	0.72069	125.366	0.495252
0.0175751	0.000409492	2.12268	0.891222	124.728	0.408592
0.0175751	0.000517947	2.10781	1.09694	123.958	0.315427
0.0175751	0.000655129	2.08996	1.34252	123.036	0.217753
0.0175751	0.000828643	2.06873	1.63293	121.945	0.117729
0.0175751	0.00104811	2.04374	1.97222	120.666	0.0178107
0.0175751	0.00132571	2.01467	2.36373	119.187	-0.0797214
0.0175751	0.00167683	1.98128	2.80907	117.498	-0.172804
0.0175751	0.00212095	1.94341	3.3085	115.596	-0.259922
0.0175751	0.0026827	1.90106	3.85999	113.486	-0.34003
0.0175751	0.00339322	1.85433	4.45968	111.18	-0.412629
0.0175751	0.00429193	1.80353	5.10108	108.697	-0.477587
0.0175751	0.00542868	1.74911	5.77522	106.069	-0.535078
0.0175751	0.00686649	1.69171	6.47137	103.333	-0.585522
0.0175751	0.00868511	1.63207	7.17677	100.534	-0.629448
0.0175751	0.0109854	1.57109	7.87709	97.7263	-0.66743
0.0175751	0.013895	1.50975	8.55715	94.9671	-0.700057
0.0175751	0.0175751	1.44907	9.20116	92.318	-0.72788
0.0175751	0.02223	1.39005	9.79397	89.8403	-0.751423
0.0175751	0.0281177	1.33359	10.3222	87.59	-0.771171
0.0175751	0.0355648	1.2804	10.776	85.6118	-0.787599
0.0175751	0.0449843	1.23087	11.1507	83.9314	-0.801178
0.0175751	0.0568987	1.18509	11.4482	82.5506	-0.812386
0.0175751	0.0719686	1.14282	11.6767	81.447	-0.821707
0.0175751	0.0910298	1.10358	11.849	80.5813	-0.829596
0.0175751	0.11514	1.06685	11.9794	79.9075	-0.836452
0.0175751	0.145635	1.03213	12.082	79.3816	-0.842593
0.0175751	0.184207	0.99902	12.1685	78.9677	-0.84826
0.0175751	0.232995	0.967254	12.2488	78.6381	-0.853625
0.0175751	0.294705	0.936642	12.3311	78.3729	-0.858809
0.0175751	0.372759	0.907071	12.4225	78.1581	-0.863901
0.0175751	0.471487	0.878482	12.5298	77.9835	-0.868965
0.0175751	0.596362	0.850853	12.6602	77.8416	-0.874051
0.0175751	0.754312	0.824186	12.8216	77.7271	-0.879203
0.0175751	0.954095	0.798503	13.0236	77.6353	-0.88446
0.0175751	1.20679	0.773838	13.2776	77.5627	-0.889856
0.0175751	1.52642	0.75023	13.598	77.5063	-0.895425
0.0175751	1.9307	0.727735	14.0027	77.4634	-0.901193
0.0175751	2.44205	0.706405	14.5143	77.4318	-0.907178
0.0175751	3.08884	0.686275	15.1612	77.4095	-0.91339
0.0175751	3.90694	0.667395	15.9793	77.3946	-0.919817
0.0175751	4.94171	0.649794	17.0141	77.3857	-0.926427
0.0175751	6.25055	0.633492	18.323	77.3814	-0.933164
0.0175751	7.90604	0.618491	19.9785	77.3805	-0.939944
0.0175751	10	0.604773	22.0724	77.3821	-0.946662
0.02223	0.0001	2.73249	0.236266	126.648	0.840832
0.02223	0.000126486	2.7271	0.2965	126.425	0.803876
0.02223	0.000159986	2.72039	0.371393	126.147	0.759755
0.02223	0.000202359	2.71206	0.464078	125.803	0.707772
0.02223	0.000255955	2.70178	0.578194	125.379	0.647439
0.02223	0.000323746	2.68916	0.718023	124.858	0.578523
0.02223	0.000409492	2.67375	0.88792	124.226	0.501402
0.02223	0.000517947	2.65509	1.09296	123.461	0.416785
0.02223	0.000655129	2.63268	1.33787	122.547	0.326104
0.02223	0.000828643	2.60604	1.62734	121.463	0.231187
0.02223	0.00104811	2.57467	1.9657	120.194	0.134123
0.02223	0.00132571	2.53818	2.35611	118.725	0.0372001
0.02223	0.00167683	2.49624	2.80044	117.048	-0.0574325
0.02223	0.00212095	2.44867	3.29899	115.159	-0.147943
0.02223	0.0026827	2.39544	3.84964	113.062	-0.232856
0.02223	0.00339322	2.33672	4.44846	110.77	-0.31123
0.02223	0.00429193	2.27287	5.08889	108.303	-0.382519
0.02223	0.00542868	2.20445	5.76252	105.689	-0.446602
0.02223	0.00686649	2.13225	6.45836	102.968	-0.503585
0.02223	0.00868511	2.05722	7.16373	100.184	-0.553794
0.02223	0.0109854	1.98048	7.8644	97.3895	-0.597663
0.02223	0.013895	1.90327	8.54499	94.6432	-0.635677
0.02223	0.0175751	1.82687	9.18986	92.0057	-0.668346
0.02223	0.02223	1.75254	9.78385	89.5381	-0.696172
0.02223	0.0281177	1.68142	10.3135	87.2964	-0.719645
0.02223	0.0355648	1.6144	10.7688	85.3256	-0.73926
0.02223	0.0449843	1.552	11.1451	83.6517	-0.755534
0.02223	0.0568987	1.49433	11.444	82.2769	-0.769007
0.02223	0.0719686	1.44109	11.6737	81.1793	-0.780236
0.02223	0.0910298	1.39168	11.8469	80.32	-0.789755
0.02223	0.11514	1.34543	11.9781	79.6528	-0.798037
0.02223	0.145635	1.30173	12.0811	79.1339	-0.805463
0.02223	0.184207	1.26006	12.1679	78.7271	-0.812323
0.02223	0.232995	1.22008	12.2485	78.4048	-0.818825
0.02223	0.294705	1.18156	12.3309	78.1468	-0.825116
0.02223	0.372759	1.14434	12.4224	77.939	-0.831302
0.02223	0.471487	1.10836	12.5298	77.7713	-0.837462
0.02223	0.596362	1.07358	12.6602	77.6362	-0.843659
0.02223	0.754312	1.04	12.8216	77.5282	-0.849945
0.02223	0.954095	1.00767	13.0236	77.4427	-0.856368
0.02223	1.20679	0.976608	13.2776	77.3762	-0.862973
0.02223	1.52642	0.946875	13.598	77.3256	-0.869799
0.02223	1.9307	0.918543	14.0027	77.2882	-0.876881
0.02223	2.44205	0.891674	14.5143	77.2618	-0.884243
0.02223	3.08884	0.866317	15.1612	77.2444	-0.891896
0.02223	3.90694	0.842528	15.9793	77.2342	-0.89983
0.02223	4.94171	0.82035	17.0141	77.2296	-0.908004
0.02223	6.25055	0.799808	18.323	77.2293	-0.91635
0.02223	7.90604	0.780903	19.9785	77.2321	-0.924766
0.02223	10	0.763614	22.0724	77.2371	-0.933122
0.0281177	0.0001	3.43782	0.235081	125.995	0.871992
0.0281177	0.000126486	3.43107	0.29502	125.773	0.841646
0.0281177	0.000159986	3.42267	0.369528	125.498	0.805111
0.0281177	0.000202359	3.41224	0.461772	125.158	0.761606
0.0281177	0.000255955	3.39937	0.575403	124.738	0.710473
0.0281177	0.000323746	3.38357	0.714613	124.223	0.651254
0.0281177	0.000409492	3.36429	0.883842	123.596	0.583891
0.0281177	0.000517947	3.34092	1.0879	122.84	0.508716
0.0281177	0.000655129	3.31286	1.33184	121.934	0.426511
0.0281177	0.000828643	3.27947	1.62042	120.86	0.338589
0.0281177	0.00104811	3.24017	1.95753	119.602	0.246771
0.0281177	0.00132571	3.19443	2.34682	118.146	0.152963
0.0281177	0.00167683	3.14185	2.78989	116.483	0.0593353
0.0281177	0.00212095	3.0822	3.28705	114.61	-0.0321623
0.0281177	0.0026827	3.01544	3.8365	112.53	-0.119829
0.0281177	0.00339322	2.94178	4.4341	110.256	-0.202325
0.0281177	0.00429193	2.86165	5.07367	107.807	-0.278757
0.0281177	0.00542868	2.77574	5.74664	105.213	-0.3486
0.0281177	0.00686649	2.68505	6.44218	102.51	-0.41164
0.0281177	0.00868511	2.5908	7.14745	99.7439	-0.467913
0.0281177	0.0109854	2.49437	7.84836	96.9672	-0.517658
0.0281177	0.013895	2.3973	8.52965	94.2369	-0.561213
0.0281177	0.0175751	2.30123	9.17561	91.6139	-0.598979
0.0281177	0.02223	2.20773	9.77106	89.1588	-0.631393
0.0281177	0.0281177	2.11823	10.3025	86.928	-0.658919
0.0281177	0.0355648	2.03387	10.7597	84.9665	-0.682049
0.0281177	0.0449843	1.95534	11.138	83.3006	-0.701322
0.0281177	0.0568987	1.88276	11.4387	81.9334	-0.717334
0.0281177	0.0719686	1.81576	11.6699	80.8433	-0.730714
0.0281177	0.0910298	1.75361	11.8444	79.9918	-0.742077
0.0281177	0.11514	1.69546	11.9764	79.3328	-0.751978
0.0281177	0.145635	1.64052	12.08	78.8227	-0.760867
0.0281177	0.184207	1.58815	12.1673	78.4248	-0.769087
0.0281177	0.232995	1.5379	12.248	78.1115	-0.776888
0.0281177	0.294705	1.48948	12.3306	77.8625	-0.784448
0.0281177	0.372759	1.4427	12.4222	77.6636	-0.791892
0.0281177	0.471487	1.39746	12.5297	77.5045	-0.799318
0.0281177	0.596362	1.35374	12.6601	77.3779	-0.8068
0.0281177	0.754312	1.31152	12.8216	77.278	-0.814404
0.0281177	0.954095	1.27085	13.0236	77.2004	-0.822189
0.0281177	1.20679	1.23179	13.2776	77.1415	-0.830208
0.0281177	1.52642	1.19439	13.598	77.0981	-0.838513
0.0281177	1.9307	1.15874	14.0027	77.0677	-0.847146
0.0281177	2.44205	1.12493	14.5143	77.0479	-0.85614
0.0281177	3.08884	1.09302	15.1612	77.0367	-0.865509
0.0281177	3.90694	1.06308	15.9793	77.0323	-0.875243
0.0281177	4.94171	1.03516	17.0141	77.0331	-0.885296
0.0281177	6.25055	1.0093	18.323	77.0378	-0.895584
0.0281177	7.90604	0.985501	19.9785	77.0452	-0.905981
0.0281177	10	0.963733	22.0724	77.0543	-0.916329
0.0355648	0.0001	4.31933	0.233622	125.178	0.897376
0.0355648	0.000126486	4.31089	0.293176	124.96	0.872645
0.0355648	0.000159986	4.3004	0.367239	124.688	0.842645
0.0355648	0.000202359	4.28739	0.45894	124.352	0.806613
0.0355648	0.000255955	4.27132	0.571915	123.937	0.763829
0.0355648	0.000323746	4.25159	0.710348	123.428	0.713681
0.0355648	0.000409492	4.22751	0.878667	122.81	0.655841
0.0355648	0.000517947	4.19832	1.08175	122.062	0.590253
0.0355648	0.000655129	4.16326	1.32441	121.167	0.517313
0.0355648	0.000828643	4.12154	1.61156	120.106	0.437805
0.0355648	0.00104811	4.07241	1.94742	118.862	0.352999
0.0355648	0.00132571	4.01521	2.33505	117.422	0.264582
0.0355648	0.00167683	3.94945	2.77653	115.778	0.174388
0.0355648	0.00212095	3.87482	3.2721	113.924	0.0843338
0.0355648	0.0026827	3.79127	3.82002	111.865	-0.00377792
0.0355648	0.00339322	3.69902	4.41637	109.613	-0.0883941
0.0355648	0.00429193	3.59863	5.05482	107.187	-0.168278
0.0355648	0.00542868	3.49101	5.72685	104.616	-0.242556
0.0355648	0.00686649	3.37736	6.42165	101.937	-0.310673
0.0355648	0.00868511	3.25915	7.12689	99.1936	-0.372399
0.0355648	0.0109854	3.13816	7.82815	96.4386	-0.427672
0.0355648	0.013895	3.01633	8.51031	93.7283	-0.476634
0.0355648	0.0175751	2.89568	9.15765	91.1233	-0.519522
0.0355648	0.02223	2.77821	9.75492	88.684	-0.556661
0.0355648	0.0281177	2.66575	10.2885	86.4668	-0.588438
0.0355648	0.0355648	2.55973	10.7482	84.5166	-0.615309
0.0355648	0.0449843	2.46099	11.1289	82.8609	-0.637821
0.0355648	0.0568987	2.36976	11.4319	81.503	-0.656599
0.0355648	0.0719686	2.28557	11.6652	80.4222	-0.672337
0.0355648	0.0910298	2.20751	11.8411	79.5804	-0.685732
0.0355648	0.11514	2.1345	11.9742	78.9318	-0.697421
0.0355648	0.145635	2.06554	12.0786	78.4325	-0.707931
0.0355648	0.184207	1.99982	12.1664	78.0456	-0.717663
0.0355648	0.232995	1.93677	12.2475	77.7435	-0.726913
0.0355648	0.294705	1.87601	12.3303	77.5057	-0.735891
0.0355648	0.372759	1.8173	12.422	77.3178	-0.744749
0.0355648	0.471487	1.76052	12.5295	77.1695	-0.753602
0.0355648	0.596362	1.70563	12.66	77.0534	-0.76254
0.0355648	0.754312	1.65263	12.8215	76.9637	-0.771644
0.0355648	0.954095	1.60157	13.0235	76.896	-0.780984
0.0355648	1.20679	1.5525	13.2776	76.8465	-0.790628
0.0355648	1.52642	1.50552	13.598	76.8122	-0.800639
0.0355648	1.9307	1.46074	14.0027	76.7905	-0.811072
0.0355648	2.44205	1.41826	14.5143	76.7788	-0.821968
0.0355648	3.08884	1.37815	15.1612	76.7754	-0.833349
0.0355648	3.90694	1.34051	15.9793	76.7782	-0.845205
0.0355648	4.94171	1.30542	17.0141	76.7858	-0.857484
0.0355648	6.25055	1.2729	18.323	76.7968	-0.870085
0.0355648	7.90604	1.24297	19.9785	76.81	-0.882857
0.0355648	10	1.21559	22.0724	76.8244	-0.895604
0.0449843	0.0001	5.41765	0.231781	124.16	0.917945
0.0449843	0.000126486	5.40716	0.290904	123.945	0.897894
0.0449843	0.000159986	5.3941	0.364378	123.678	0.873447
0.0449843	0.000202359	5.37792	0.455448	123.347	0.843847
0.0449843	0.000255955	5.35792	0.567574	122.939	0.80843
0.0449843	0.000323746	5.33336	0.705039	122.439	0.766482
0.0449843	0.000409492	5.30337	0.872156	121.829	0.717544
0.0449843	0.000517947	5.26704	1.07398	121.093	0.66126
0.0449843	0.000655129	5.22337	1.31523	120.211	0.597702
0.0449843	0.000828643	5.17139	1.60062	119.166	0.527285
0.0449843	0.00104811	5.11016	1.93466	117.94	0.450758
0.0449843	0.00132571	5.03887	2.32024	116.521	0.369424
0.0449843	0.00167683	4.95685	2.75983	114.897	0.284711
0.0449843	0.00212095	4.86373	3.2534	113.068	0.198386
0.0449843	0.0026827	4.75942	3.79942	111.036	0.112165
0.0449843	0.00339322	4.64422	4.39402	108.811	0.0276815
0.0449843	0.00429193	4.5188	5.031	106.414	-0.0536341
0.0449843	0.00542868	4.38426	5.70191	103.872	-0.130639
0.0449843	0.00686649	4.2421	6.39612	101.221	-0.202479
0.0449843	0.00868511	4.09419	7.10112	98.5066	-0.268589
0.0449843	0.0109854	3.94272	7.80281	95.7784	-0.328644
0.0449843	0.013895	3.7901	8.48602	93.0931	-0.382525
0.0449843	0.0175751	3.63887	9.13503	90.5106	-0.430264
0.0449843	0.02223	3.49157	9.73457	88.0911	-0.47202
0.0449843	0.0281177	3.35048	10.2709	85.8906	-0.508057
0.0449843	0.0355648	3.21741	10.7337	83.9548	-0.538759
0.0449843	0.0449843	3.09348	11.1175	82.3115	-0.564634
0.0449843	0.0568987	2.97899	11.4234	80.9651	-0.58632
0.0449843	0.0719686	2.87337	11.6591	79.8958	-0.604557
0.0449843	0.0910298	2.77549	11.8369	79.066	-0.620118
0.0449843	0.11514	2.684	11.9715	78.4301	-0.633721
0.0449843	0.145635	2.59761	12.0768	77.9441	-0.645969
0.0449843	0.184207	2.5153	12.1652	77.5709	-0.657328
0.0449843	0.232995	2.43635	12.2468	77.2827	-0.668143
0.0449843	0.294705	2.36026	12.3299	77.0587	-0.67866
0.0449843	0.372759	2.28673	12.4218	76.8845	-0.68906
0.0449843	0.471487	2.21561	12.5294	76.7497	-0.699476
0.0449843	0.596362	2.14685	12.6599	76.6467	-0.710018
0.0449843	0.754312	2.08043	12.8215	76.5697	-0.720783
0.0449843	0.954095	2.01643	13.0235	76.5142	-0.731857
0.0449843	1.20679	1.95492	13.2775	76.4765	-0.743322
0.0449843	1.52642	1.89601	13.598	76.4535	-0.755258
0.0449843	1.9307	1.83985	14.0027	76.4425	-0.767734
0.0449843	2.44205	1.78655	14.5143	76.4411	-0.780803
0.0449843	3.08884	1.73623	15.1612	76.4473	-0.794498
0.0449843	3.90694	1.689	15.9793	76.4592	-0.808811
0.0449843	4.94171	1.64495	17.0141	76.4753	-0.823684
0.0449843	6.25055	1.60413	18.323	76.4941	-0.839001
0.0449843	7.90604	1.56655	19.9785	76.5145	-0.854579
0.0449843	10	1.53217	22.0724	76.5355	-0.870181
0.0568987	0.0001	6.78094	0.229476	122.897	0.934533
0.0568987	0.000126486	6.76798	0.288056	122.687	0.918352
0.0568987	0.000159986	6.75179	0.360849	122.425	0.898533
0.0568987	0.000202359	6.73175	0.451069	122.101	0.874403
0.0568987	0.000255955	6.70697	0.562231	121.7	0.845311
0.0568987	0.000323746	6.6765	0.698397	121.21	0.810601
0.0568987	0.000409492	6.63934	0.864213	120.612	0.769652
0.0568987	0.000517947	6.59427	1.06433	119.89	0.722055
0.0568987	0.000655129	6.54009	1.30363	119.025	0.667598
0.0568987	0.000828643	6.47558	1.58703	117.998	0.606324
0.0568987	0.00104811	6.39956	1.91868	116.794	0.538682
0.0568987	0.00132571	6.31099	2.30195	115.399	0.465467
0.0568987	0.00167683	6.20912	2.73893	113.804	0.387815
0.0568987	0.00212095	6.09327	3.23011	112.005	0.307094
0.0568987	0.0026827	5.9635	3.77373	110.004	0.224886
0.0568987	0.00339322	5.82013	4.36598	107.814	0.142758
0.0568987	0.00429193	5.66389	5.00113	105.452	0.0621436
0.0568987	0.00542868	5.49619	5.67072	102.946	-0.0156293
0.0568987	0.00686649	5.31891	6.36398	100.332	-0.0894532
0.0568987	0.00868511	5.13432	7.06877	97.6519	-0.158521
0.0568987	0.0109854	4.94514	7.77102	94.957	-0.222227
0.0568987	0.013895	4.75443	8.45547	92.3028	-0.280171
0.0568987	0.0175751	4.56533	9.10657	89.7481	-0.332158
0.0568987	0.02223	4.38099	9.70892	87.353	-0.378138
0.0568987	0.0281177	4.20435	10.2487	85.1734	-0.418207
0.0568987	0.0355648	4.03763	10.7153	83.2554	-0.452632
0.0568987	0.0449843	3.8824	11.1029	81.6273	-0.481841
0.0568987	0.0568987	3.73899	11.4125	80.2949	-0.506452
0.0568987	0.0719686	3.60676	11.6513	79.2397	-0.527232
0.0568987	0.0910298	3.48429	11.8316	78.4246	-0.54501
0.0568987	0.11514	3.36989	11.968	77.8042	-0.560579
0.0568987	0.145635	3.26193	12.0746	77.3345	-0.574619
0.0568987	0.184207	3.15911	12.1638	76.9783	-0.587662
0.0568987	0.232995	3.06049	12.2459	76.7071	-0.600103
0.0568987	0.294705	2.96545	12.3293	76.5003	-0.612227
0.0568987	0.372759	2.87359	12.4214	76.343	-0.624244
0.0568987	0.471487	2.78474	12.5292	76.2248	-0.636313
0.0568987	0.596362	2.69879	12.6598	76.1379	-0.648563
0.0568987	0.754312	2.61577	12.8214	76.0767	-0.661108
0.0568987	0.954095	2.53574	13.0235	76.0363	-0.674053
0.0568987	1.20679	2.45881	13.2775	76.0133	-0.687499
0.0568987	1.52642	2.3851	13.598	76.0043	-0.701546
0.0568987	1.9307	2.31482	14.0027	76.0067	-0.716278
0.0568987	2.44205	2.2481	14.5143	76.018	-0.731769
0.0568987	3.08884	2.18509	15.1612	76.0361	-0.748062
0.0568987	3.90694	2.12594	15.9793	76.0593	-0.765158
0.0568987	4.94171	2.07076	17.0141	76.0859	-0.782995
0.0568987	6.25055	2.01962	18.323	76.1144	-0.80144
0.0568987	7.90604	1.97252	19.9785	76.1438	-0.82028
0.0568987	10	1.92942	22.0724	76.173	-0.839227
0.0719686	0.0001	8.46532	0.226661	121.337	0.947846
0.0719686	0.000126486	8.44935	0.284541	121.132	0.934842
0.0719686	0.000159986	8.42939	0.356484	120.877	0.918851
0.0719686	0.000202359	8.40469	0.445666	120.56	0.899289
0.0719686	0.000255955	8.37413	0.55558	120.17	0.875566
0.0719686	0.000323746	8.33655	0.690256	119.692	0.847065
0.0719686	0.000409492	8.2907	0.854318	119.108	0.813162
0.0719686	0.000517947	8.23506	1.05234	118.403	0.773384
0.0719686	0.000655129	8.16817	1.28939	117.558	0.727331
0.0719686	0.000828643	8.08849	1.57029	116.554	0.674847
0.0719686	0.00104811	7.99454	1.89912	115.377	0.616093
0.0719686	0.00132571	7.885	2.2794	114.012	0.551493
0.0719686	0.00167683	7.75894	2.71314	112.451	0.481833
0.0719686	0.00212095	7.61553	3.20106	110.689	0.40812
0.0719686	0.0026827	7.45471	3.74181	108.728	0.331612
0.0719686	0.00339322	7.2769	4.33144	106.579	0.253736
0.0719686	0.00429193	7.0831	4.96405	104.261	0.175897
0.0719686	0.00542868	6.87483	5.63183	101.799	0.099387
0.0719686	0.00686649	6.65452	6.32396	99.2291	0.0254697
0.0719686	0.00868511	6.42493	7.02843	96.5925	-0.0448589
0.0719686	0.0109854	6.18945	7.73117	93.9391	-0.11075
0.0719686	0.013895	5.95181	8.4172	91.323	-0.171576
0.0719686	0.0175751	5.716	9.07082	88.8028	-0.226879
0.0719686	0.02223	5.48595	9.67663	86.438	-0.276383
0.0719686	0.0281177	5.26532	10.2207	84.2841	-0.319988
0.0719686	0.0355648	5.05704	10.692	82.3877	-0.357796
0.0719686	0.0449843	4.86299	11.0845	80.7785	-0.390125
0.0719686	0.0568987	4.68379	11.3987	79.4633	-0.417528
0.0719686	0.0719686	4.51863	11.6414	78.425	-0.440764
0.0719686	0.0910298	4.36581	11.8248	77.6277	-0.460699
0.0719686	0.11514	4.22317	11.9635	77.0262	-0.47819
0.0719686	0.145635	4.08866	12.0717	76.5764	-0.493989
0.0719686	0.184207	3.96061	12.162	76.2409	-0.508688
0.0719686	0.232995	3.83781	12.2448	75.9907	-0.522737
0.0719686	0.294705	3.71947	12.3286	75.8048	-0.536459
0.0719686	0.372759	3.60508	12.421	75.6683	-0.550098
0.0719686	0.471487	3.4944	12.5289	75.5705	-0.563836
0.0719686	0.596362	3.38732	12.6597	75.5035	-0.577825
0.0719686	0.754312	3.28384	12.8213	75.4616	-0.5922
0.0719686	0.954095	3.18406	13.0234	75.44	-0.607087
0.0719686	1.20679	3.08811	13.2775	75.4349	-0.622609
0.0719686	1.52642	2.99616	13.5979	75.4433	-0.638888
0.0719686	1.9307	2.90844	14.0027	75.4621	-0.656032
0.0719686	2.44205	2.82515	14.5143	75.4891	-0.674136
0.0719686	3.08884	2.74646	15.1612	75.5221	-0.693264
0.0719686	3.90694	2.67257	15.9793	75.5592	-0.713426
0.0719686	4.94171	2.60362	17.0141	75.5987	-0.734565
0.0719686	6.25055	2.53969	18.323	75.6393	-0.756533
0.0719686	7.90604	2.48081	19.9785	75.6798	-0.779084
0.0719686	10	2.42692	22.0724	75.7192	-0.801879
0.0910298	0.0001	10.5346	0.223203	119.421	0.958504
0.0910298	0.000126486	10.515	0.28023	119.222	0.948083
0.0910298	0.000159986	10.4905	0.351126	118.975	0.935227
0.0910298	0.000202359	10.4603	0.439003	118.668	0.919444
0.0910298	0.000255955	10.4228	0.5474	118.29	0.900203
0.0910298	0.000323746	10.3768	0.680253	117.826	0.876956
0.0910298	0.000409492	10.3205	0.84216	117.26	0.849112
0.0910298	0.000517947	10.2523	1.03767	116.575	0.816177
0.0910298	0.000655129	10.1702	1.27195	115.754	0.777672
0.0910298	0.000828643	10.0723	1.54948	114.779	0.733349
0.0910298	0.00104811	9.95682	1.87489	113.635	0.683073
0.0910298	0.00132571	9.82212	2.25143	112.307	0.627048
0.0910298	0.00167683	9.66684	2.68143	110.786	0.5657
0.0910298	0.00212095	9.49027	3.16536	109.069	0.49977
0.0910298	0.0026827	9.29202	3.70233	107.156	0.430164
0.0910298	0.00339322	9.07265	4.28838	105.059	0.358077
0.0910298	0.00429193	8.83325	4.91815	102.794	0.284705
0.0910298	0.00542868	8.57582	5.58356	100.386	0.211327
0.0910298	0.00686649	8.30319	6.27418	97.8701	0.139189
0.0910298	0.00868511	8.01879	6.97816	95.2864	0.0693898
0.0910298	0.0109854	7.7268	7.68152	92.6834	0.00293858
0.0910298	0.013895	7.43185	8.36932	90.1145	-0.0593293
0.0910298	0.0175751	7.13881	9.02599	87.6368	-0.116746
0.0910298	0.02223	6.85265	9.63602	85.3091	-0.168805
0.0910298	0.0281177	6.57795	10.1853	83.1868	-0.215193
0.0910298	0.0355648	6.31844	10.6625	81.3171	-0.255819
0.0910298	0.0449843	6.0766	11.0611	79.7306	-0.290851
0.0910298	0.0568987	5.85329	11.381	78.436	-0.32074
0.0910298	0.0719686	5.64764	11.6288	77.4181	-0.346202
0.0910298	0.0910298	5.45754	11.8162	76.642	-0.36811
0.0910298	0.11514	5.2803	11.9577	76.0633	-0.387366
0.0910298	0.145635	5.11331	12.068	75.6376	-0.404781
0.0910298	0.184207	4.95444	12.1596	75.3271	-0.42101
0.0910298	0.232995	4.80213	12.2433	75.1023	-0.436549
0.0910298	0.294705	4.65534	12.3277	74.942	-0.451766
0.0910298	0.372759	4.51345	12.4204	74.8308	-0.466932
0.0910298	0.471487	4.37612	12.5286	74.7579	-0.48226
0.0910298	0.596362	4.24321	12.6595	74.7152	-0.497925
0.0910298	0.754312	4.11472	12.8212	74.6969	-0.514084
0.0910298	0.954095	3.99077	13.0233	74.6982	-0.530887
0.0910298	1.20679	3.87153	13.2775	74.7153	-0.548483
0.0910298	1.52642	3.7572	13.5979	74.7448	-0.567021
0.0910298	1.9307	3.64809	14.0027	74.7839	-0.586637
0.0910298	2.44205	3.54446	14.5143	74.8301	-0.607452
0.0910298	3.08884	3.44651	15.1612	74.8813	-0.629561
0.0910298	3.90694	3.3545	15.9793	74.9355	-0.652992
0.0910298	4.94171	3.2686	17.0141	74.991	-0.677696
0.0910298	6.25055	3.18894	18.323	75.0465	-0.703519
0.0910298	7.90604	3.11554	19.9785	75.1006	-0.730187
0.0910298	10	3.04834	22.0724	75.1526	-0.757305
0.11514	0.0001	13.059	0.219012	117.084	0.967011
0.11514	0.000126486	13.0352	0.274962	116.893	0.958684
0.11514	0.000159986	13.0055	0.3446	116.655	0.948375
0.11514	0.000202359	12.9686	0.430921	116.36	0.935681
0.11514	0.000255955	12.9231	0.537455	115.996	0.920144
0.11514	0.000323746	12.8671	0.668106	115.549	0.901279
0.11514	0.000409492	12.7986	0.82732	115.004	0.878567
0.11514	0.000517947	12.7155	1.01977	114.344	0.85151
0.11514	0.000655129	12.6154	1.25054	113.552	0.819624
0.11514	0.000828643	12.496	1.52421	112.612	0.78257
0.11514	0.00104811	12.355	1.84516	111.506	0.740122
0.11514	0.00132571	12.1905	2.21717	110.222	0.692223
0.11514	0.00167683	12.0007	2.64226	108.751	0.639109
0.11514	0.00212095	11.7846	3.12147	107.088	0.58118
0.11514	0.0026827	11.5416	3.65374	105.233	0.519096
0.11514	0.00339322	11.2725	4.23545	103.198	0.45377
0.11514	0.00429193	10.9785	4.86155	100.997	0.386169
0.11514	0.00542868	10.6621	5.52377	98.6555	0.317456
0.11514	0.00686649	10.3264	6.21257	96.205	0.248736
0.11514	0.00868511	9.97595	6.91571	93.686	0.181169
0.11514	0.0109854	9.61562	7.61965	91.1448	0.115807
0.11514	0.013895	9.25123	8.30955	88.6331	0.0536239
0.11514	0.0175751	8.88853	8.96989	86.2072	-0.00455566
0.11514	0.02223	8.534	9.58504	83.9248	-0.0580073
0.11514	0.0281177	8.19326	10.1407	81.8411	-0.106219
0.11514	0.0355648	7.871	10.6251	80.0037	-0.148904
0.11514	0.0449843	7.57066	11.0314	78.4446	-0.186039
0.11514	0.0568987	7.29335	11.3585	77.1746	-0.21795
0.11514	0.0719686	7.03818	11.6125	76.1808	-0.245264
0.11514	0.0910298	6.80262	11.805	75.4299	-0.268835
0.11514	0.11514	6.58329	11.9503	74.8781	-0.289584
0.11514	0.145635	6.3769	12.0632	74.4811	-0.308366
0.11514	0.184207	6.18069	12.1566	74.2004	-0.325888
0.11514	0.232995	5.99268	12.2414	74.0063	-0.342695
0.11514	0.294705	5.81148	12.3265	73.8767	-0.359193
0.11514	0.372759	5.63632	12.4197	73.7961	-0.375686
0.11514	0.471487	5.46672	12.5282	73.7532	-0.392414
0.11514	0.596362	5.30251	12.6592	73.7401	-0.409577
0.11514	0.754312	5.1437	12.8211	73.7504	-0.427356
0.11514	0.954095	4.99041	13.0233	73.7795	-0.44593
0.11514	1.20679	4.84289	13.2774	73.8233	-0.465474
0.11514	1.52642	4.70136	13.5979	73.8786	-0.48617
0.11514	1.9307	4.56625	14.0027	73.9424	-0.508184
0.11514	2.44205	4.43781	14.5143	74.0121	-0.531681
0.11514	3.08884	4.31637	15.1612	74.0855	-0.556785
0.11514	3.90694	4.20223	15.9793	74.1606	-0.583557
0.11514	4.94171	4.09565	17.0141	74.2356	-0.611967
0.11514	6.25055	3.99675	18.323	74.3092	-0.641864
0.11514	7.90604	3.90559	19.9785	74.3801	-0.672954
0.11514	10	3.82211	22.0724	74.4474	-0.704794
0.145635	0.0001	16.1131	0.213932	114.259	0.973794
0.145635	0.000126486	16.0844	0.268642	114.077	0.967145
0.145635	0.000159986	16.0486	0.336738	113.85	0.958898
0.145635	0.000202359	16.0042	0.421189	113.569	0.948715
0.145635	0.000255955	15.9493	0.525384	113.221	0.936219
0.145635	0.000323746	15.8818	0.653353	112.795	0.920974
0.145635	0.000409492	15.7991	0.809359	112.274	0.902537
0.145635	0.000517947	15.6987	0.99807	111.644	0.880447
0.145635	0.000655129	15.5778	1.22457	110.886	0.854238
0.145635	0.000828643	15.4334	1.49346	109.986	0.82354
0.145635	0.00104811	15.2628	1.80915	108.927	0.788056
0.145635	0.00132571	15.0632	2.17539	107.696	0.747614
0.145635	0.00167683	14.833	2.59465	106.284	0.702236
0.145635	0.00212095	14.5705	3.06791	104.685	0.652133
0.145635	0.0026827	14.2751	3.59422	102.9	0.597722
0.145635	0.00339322	13.9472	4.17074	100.938	0.539602
0.145635	0.00429193	13.5888	4.79185	98.815	0.478597
0.145635	0.00542868	13.2023	5.45044	96.552	0.415587
0.145635	0.00686649	12.7918	6.1365	94.1812	0.351607
0.145635	0.00868511	12.3625	6.83857	91.7396	0.287687
0.145635	0.0109854	11.9204	7.54307	89.2726	0.224898
0.145635	0.013895	11.4724	8.23533	86.8304	0.164255
0.145635	0.0175751	11.0261	8.8999	84.4673	0.106704
0.145635	0.02223	10.589	9.52117	82.2399	0.0530984
0.145635	0.0281177	10.1681	10.0846	80.203	0.00412711
0.145635	0.0355648	9.76987	10.5779	78.4042	-0.0397128
0.145635	0.0449843	9.39827	10.9936	76.8778	-0.0782313
0.145635	0.0568987	9.05528	11.3298	75.6368	-0.111576
0.145635	0.0719686	8.73999	11.5918	74.6709	-0.140262
0.145635	0.0910298	8.44939	11.7907	73.9491	-0.165082
0.145635	0.11514	8.1793	11.9408	73.4289	-0.186952
0.145635	0.145635	7.92555	12.057	73.0656	-0.206753
0.145635	0.184207	7.6846	12.1527	72.8201	-0.225237
0.145635	0.232995	7.45381	12.239	72.6623	-0.24299
0.145635	0.294705	7.2315	12.325	72.5693	-0.260452
0.145635	0.372759	7.01649	12.4188	72.5251	-0.277964
0.145635	0.471487	6.80826	12.5276	72.5183	-0.295789
0.145635	0.596362	6.60656	12.6589	72.5403	-0.314154
0.145635	0.754312	6.41137	12.8209	72.5851	-0.333268
0.145635	0.954095	6.22286	13.0231	72.6475	-0.353335
0.145635	1.20679	6.04129	13.2774	72.7236	-0.374564
0.145635	1.52642	5.86705	13.5979	72.8099	-0.397167
0.145635	1.9307	5.70059	14.0027	72.9034	-0.421355
0.145635	2.44205	5.54222	14.5143	73.0014	-0.447339
0.145635	3.08884	5.39241	15.1612	73.1016	-0.475283
0.145635	3.90694	5.25154	15.9793	73.202	-0.505292
0.145635	4.94171	5.1199	17.0141	73.3007	-0.537373
0.145635	6.25055	4.9977	18.323	73.3962	-0.571393
0.145635	7.90604	4.88501	19.9785	73.4875	-0.607054
0.145635	10	4.78176	22.0724	73.5734	-0.643873
0.184207	0.0001	19.7711	0.207863	110.876	0.979192
0.184207	0.000126486	19.7369	0.261068	110.704	0.973891
0.184207	0.000159986	19.6943	0.327319	110.491	0.967303
0.184207	0.000202359	19.6414	0.40951	110.225	0.959153
0.184207	0.000255955	19.5758	0.510982	109.898	0.949123
0.184207	0.000323746	19.4953	0.635687	109.495	0.936845
0.184207	0.000409492	19.3965	0.787792	109.003	0.92194
0.184207	0.000517947	19.2766	0.972108	108.407	0.903983
0.184207	0.000655129	19.1319	1.19333	107.69	0.882576
0.184207	0.000828643	18.959	1.45639	106.837	0.857324
0.184207	0.00104811	18.7545	1.76579	105.832	0.827898
0.184207	0.00132571	18.5151	2.12512	104.663	0.79408
0.184207	0.00167683	18.2382	2.53716	103.32	0.755753
0.184207	0.00212095	17.9223	3.00306	101.797	0.712975
0.184207	0.0026827	17.5661	3.5222	100.095	0.665958
0.184207	0.00339322	17.1706	4.0918	98.2206	0.615113
0.184207	0.00429193	16.7368	4.70717	96.188	0.560979
0.184207	0.00542868	16.2686	5.3608	94.0191	0.504304
0.184207	0.00686649	15.7704	6.04345	91.7423	0.445907
0.184207	0.00868511	15.2483	6.7437	89.3938	0.386714
0.184207	0.0109854	14.7097	7.44857	87.0156	0.327693
0.184207	0.013895	14.1628	8.14341	84.6565	0.269853
0.184207	0.0175751	13.6168	8.81288	82.3687	0.214176
0.184207	0.02223	13.0809	9.44136	80.2073	0.161597
0.184207	0.0281177	12.5642	10.014	78.2263	0.112947
0.184207	0.0355648	12.0742	10.5182	76.4739	0.0688694
0.184207	0.0449843	11.6167	10.9454	74.9858	0.0297532
0.184207	0.0568987	11.1945	11.2929	73.7782	-0.00437704
0.184207	0.0719686	10.8068	11.565	72.8442	-0.033891
0.184207	0.0910298	10.4501	11.7721	72.1557	-0.059487
0.184207	0.11514	10.1195	11.9284	71.6713	-0.0820455
0.184207	0.145635	9.80939	12.049	71.3467	-0.10246
0.184207	0.184207	9.51543	12.1476	71.1422	-0.121505
0.184207	0.232995	9.23414	12.2358	71.0266	-0.139807
0.184207	0.294705	8.96322	12.3231	70.9764	-0.157841
0.184207	0.372759	8.70122	12.4176	70.9751	-0.175975
0.184207	0.471487	8.44738	12.5269	71.0106	-0.194501
0.184207	0.596362	8.20134	12.6585	71.0743	-0.21367
0.184207	0.754312	7.96311	12.8206	71.1598	-0.233717
0.184207	0.954095	7.73285	13.023	71.2617	-0.254875
0.184207	1.20679	7.51089	13.2773	71.3762	-0.277388
0.184207	1.52642	7.29775	13.5978	71.4993	-0.301503
0.184207	1.9307	7.09394	14.0026	71.6281	-0.327479
0.184207	2.44205	6.89992	14.5143	71.7599	-0.355575
0.184207	3.08884	6.71625	15.1612	71.8922	-0.386011
0.184207	3.90694	6.54341	15.9793	72.0227	-0.418951
0.184207	4.94171	6.38179	17.0141	72.1497	-0.454453
0.184207	6.25055	6.23166	18.323	72.2717	-0.492425
0.184207	7.90604	6.09313	19.9785	72.3872	-0.532585
0.184207	10	5.96614	22.0724	72.4956	-0.574434
0.232995	0.0001	24.1012	0.200689	106.875	0.983484
0.232995	0.000126486	24.061	0.252112	106.715	0.979261
0.232995	0.000159986	24.011	0.31619	106.516	0.974005
0.232995	0.000202359	23.9486	0.395689	106.269	0.967492
0.232995	0.000255955	23.8715	0.493978	105.964	0.959453
0.232995	0.000323746	23.7764	0.614744	105.588	0.949593
0.232995	0.000409492	23.6601	0.762325	105.129	0.937572
0.232995	0.000517947	23.5185	0.941253	104.572	0.923037
0.232995	0.000655129	23.3475	1.15635	103.902	0.905619
0.232995	0.000828643	23.1429	1.41245	103.104	0.884958
0.232995	0.00104811	22.9006	1.71404	102.162	0.86073
0.232995	0.00132571	22.6165	2.06508	101.064	0.832663
0.232995	0.00167683	22.2873	2.46835	99.8006	0.800583
0.232995	0.00212095	21.911	2.9253	98.3657	0.764434
0.232995	0.0026827	21.4865	3.43556	96.7592	0.724295
0.232995	0.00339322	21.0133	3.99686	94.987	0.680381
0.232995	0.00429193	20.4941	4.60457	93.0615	0.633083
0.232995	0.00542868	19.9324	5.25193	91.0023	0.582921
0.232995	0.00686649	19.333	5.93018	88.8358	0.530527
0.232995	0.00868511	18.7036	6.62793	86.5964	0.476705
0.232995	0.0109854	18.0527	7.33272	84.3233	0.422289
0.232995	0.013895	17.3903	8.03019	82.0625	0.368212
0.232995	0.0175751	16.7273	8.70515	79.8641	0.315429
0.232995	0.02223	16.0749	9.34195	77.7812	0.264902
0.232995	0.0281177	15.4443	9.92556	75.8666	0.21753
0.232995	0.0355648	14.8452	10.4428	74.1688	0.174091
0.232995	0.0449843	14.2851	10.8841	72.7253	0.135126
0.232995	0.0568987	13.768	11.2456	71.5556	0.100844
0.232995	0.0719686	13.2939	11.5303	70.6572	0.0710421
0.232995	0.0910298	12.8588	11.7479	70.0053	0.0451443
0.232995	0.11514	12.4565	11.9122	69.5607	0.0223347
0.232995	0.145635	12.0803	12.0385	69.2794	0.00173467
0.232995	0.184207	11.7245	12.1409	69.1213	-0.0174503
0.232995	0.232995	11.3844	12.2316	69.0539	-0.0358738
0.232995	0.294705	11.0571	12.3205	69.0529	-0.0540427
0.232995	0.372759	10.7405	12.416	69.101	-0.0723567
0.232995	0.471487	10.4337	12.526	69.1856	-0.091129
0.232995	0.596362	10.1361	12.6579	69.2976	-0.110634
0.232995	0.754312	9.84775	12.8203	69.4304	-0.131134
0.232995	0.954095	9.56883	13.0228	69.5785	-0.152888
0.232995	1.20679	9.2997	13.2772	69.7377	-0.176175
0.232995	1.52642	9.04104	13.5978	69.904	-0.20128
0.232995	1.9307	8.79344	14.0026	70.0743	-0.228512
0.232995	2.44205	8.55755	14.5143	70.2457	-0.258181
0.232995	3.08884	8.33405	15.1612	70.4157	-0.290575
0.232995	3.90694	8.12353	15.9793	70.5819	-0.325928
0.232995	4.94171	7.92652	17.0141	70.7423	-0.36437
0.232995	6.25055	7.74337	18.323	70.8954	-0.405872
0.232995	7.90604	7.57426	19.9785	71.0398	-0.450199
0.232995	10	7.41913	22.0724	71.1746	-0.496864
0.294705	0.0001	29.1574	0.19237	102.207	0.986891
0.294705	0.000126486	29.1107	0.241706	102.061	0.983531
0.294705	0.000159986	29.0528	0.303226	101.878	0.979341
0.294705	0.000202359	28.9805	0.379621	101.652	0.97414
0.294705	0.000255955	28.8909	0.474084	101.372	0.967711
0.294705	0.000323746	28.7806	0.590355	101.027	0.9598
0.294705	0.000409492	28.6451	0.732484	100.605	0.950133
0.294705	0.000517947	28.4804	0.905108	100.092	0.938398
0.294705	0.000655129	28.2812	1.11292	99.4741	0.924276
0.294705	0.000828643	28.0422	1.36073	98.7371	0.907443
0.294705	0.00104811	27.7591	1.65317	97.8661	0.887586
0.294705	0.00132571	27.4264	1.99424	96.8492	0.864432
0.294705	0.00167683	27.0403	2.38699	95.6764	0.837771
0.294705	0.00212095	26.5979	2.8331	94.342	0.807475
0.294705	0.0026827	26.0972	3.33263	92.8449	0.77352
0.294705	0.00339322	25.5389	3.88353	91.1894	0.736015
0.294705	0.00429193	24.9239	4.4819	89.3867	0.695169
0.294705	0.00542868	24.2572	5.12134	87.4538	0.651356
0.294705	0.00686649	23.5442	5.79344	85.4154	0.605051
0.294705	0.00868511	22.793	6.48773	83.3023	0.556861
0.294705	0.0109854	22.0141	7.19175	81.1515	0.507514
0.294705	0.013895	21.2191	7.89165	79.0057	0.457819
0.294705	0.0175751	20.4209	8.57248	76.9122	0.40866
0.294705	0.02223	19.6332	9.21867	74.9216	0.360965
0.294705	0.0281177	18.8692	9.81495	73.0852	0.315654
0.294705	0.0355648	18.1418	10.3475	71.451	0.273584
0.294705	0.0449843	17.4604	10.8059	70.0586	0.235421
0.294705	0.0568987	16.831	11.1846	68.9312	0.201544
0.294705	0.0719686	16.2546	11.4853	68.0711	0.171929
0.294705	0.0910298	15.7271	11.7163	67.4581	0.146148
0.294705	0.11514	15.2412	11.8909	67.0561	0.12348
0.294705	0.145635	14.7885	12.0246	66.8219	0.103081
0.294705	0.184207	14.3616	12.1321	66.7147	0.0841498
0.294705	0.232995	13.9543	12.2261	66.7009	0.0660114
0.294705	0.294705	13.5627	12.3171	66.755	0.0481298
0.294705	0.372759	13.1841	12.414	66.8588	0.0300839
0.294705	0.471487	12.817	12.5247	66.9989	0.011532
0.294705	0.596362	12.4607	12.6572	67.1659	-0.00782144
0.294705	0.754312	12.1152	12.8199	67.3526	-0.0282612
0.294705	0.954095	11.7806	13.0226	67.5534	-0.0500719
0.294705	1.20679	11.4575	13.2771	67.7638	-0.0735642
0.294705	1.52642	11.1466	13.5977	67.9798	-0.0990599
0.294705	1.9307	10.8487	14.0026	68.1978	-0.126912
0.294705	2.44205	10.5645	14.5142	68.4149	-0.157494
0.294705	3.08884	10.2949	15.1612	68.6285	-0.191162
0.294705	3.90694	10.0408	15.9793	68.8359	-0.228227
0.294705	4.94171	9.80278	17.0141	69.0351	-0.268911
0.294705	6.25055	9.58128	18.323	69.2244	-0.313275
0.294705	7.90604	9.37657	19.9785	69.4024	-0.361162
0.294705	10	9.18862	22.0724	69.5681	-0.412136
0.372759	0.0001	34.9698	0.182825	96.8479	0.989598
0.372759	0.000126486	34.9166	0.229779	96.7164	0.986924
0.372759	0.000159986	34.8505	0.288358	96.5519	0.983588
0.372759	0.000202359	34.7679	0.361145	96.348	0.979439
0.372759	0.000255955	34.6659	0.451275	96.0949	0.974299
0.372759	0.000323746	34.5398	0.562271	95.7834	0.967964
0.372759	0.000409492	34.385	0.698175	95.4019	0.960199
0.372759	0.000517947	34.196	0.863403	94.9381	0.950746
0.372759	0.000655129	33.9677	1.06269	94.378	0.939327
0.372759	0.000828643	33.6931	1.30089	93.7087	0.925651
0.372759	0.00104811	33.3672	1.58253	92.9162	0.909439
0.372759	0.00132571	32.9835	1.91184	91.989	0.890424
0.372759	0.00167683	32.5372	2.29204	90.9174	0.868384
0.372759	0.00212095	32.0244	2.72516	89.6951	0.843155
0.372759	0.0026827	31.4429	3.21163	88.3201	0.814649
0.372759	0.00339322	30.7922	3.74999	86.7959	0.782875
0.372759	0.00429193	30.074	4.33672	85.1313	0.747944
0.372759	0.00542868	29.2923	4.9662	83.3417	0.710074
0.372759	0.00686649	28.4542	5.6304	81.4485	0.669622
0.372759	0.00868511	27.569	6.31942	79.4796	0.627045
0.372759	0.0109854	26.6472	7.02162	77.4689	0.582901
0.372759	0.013895	25.7031	7.72341	75.4555	0.537887
0.372759	0.0175751	24.7517	8.4102	73.4833	0.49278
0.372759	0.02223	23.8093	9.0666	71.5998	0.448435
0.372759	0.0281177	22.8921	9.6772	69.8541	0.405747
0.372759	0.0355648	22.0157	10.2276	68.2936	0.365596
0.372759	0.0449843	21.1926	10.7062	66.9591	0.328738
0.372759	0.0568987	20.4316	11.106	65.8779	0.295698
0.372759	0.0719686	19.7353	11.4266	65.0577	0.266631
0.372759	0.0910298	19.1	11.6746	64.4845	0.241282
0.372759	0.11514	18.5175	11.8627	64.126	0.21905
0.372759	0.145635	17.9775	12.0062	63.9406	0.199152
0.372759	0.184207	17.4702	12.1204	63.8872	0.180795
0.372759	0.232995	16.9878	12.2188	63.9309	0.163284
0.372759	0.294705	16.5246	12.3126	64.0449	0.14606
0.372759	0.372759	16.077	12.4113	64.2095	0.128676
0.372759	0.471487	15.643	12.5231	64.4108	0.110769
0.372759	0.596362	15.2216	12.6562	64.6386	0.0920221
0.372759	0.754312	14.8125	12.8193	64.8852	0.0721329
0.372759	0.954095	14.4159	13.0223	65.1447	0.0507922
0.372759	1.20679	14.0324	13.2769	65.4124	0.0276655
0.372759	1.52642	13.663	13.5976	65.6839	0.00239665
0.372759	1.9307	13.3085	14.0025	65.9557	-0.025413
0.372759	2.44205	12.97	14.5142	66.2244	-0.0561874
0.372759	3.08884	12.6485	15.1612	66.4871	-0.0903543
0.372759	3.90694	12.345	15.9793	66.7412	-0.128313
0.372759	4.94171	12.0604	17.0141	66.9844	-0.170383
0.372759	6.25055	11.7952	18.323	67.2149	-0.216738
0.372759	7.90604	11.5499	19.9785	67.4312	-0.267332
0.372759	10	11.3245	22.0724	67.6323	-0.321823
0.471487	0.0001	41.5354	0.172079	90.8042	0.991748
0.471487	0.000126486	41.4761	0.216349	90.688	0.989622
0.471487	0.000159986	41.4018	0.271591	90.5433	0.986966
0.471487	0.000202359	41.3098	0.340326	90.3626	0.983658
0.471487	0.000255955	41.1951	0.425477	90.1393	0.979554
0.471487	0.000323746	41.0539	0.530512	89.8633	0.974485
0.471487	0.000409492	40.8801	0.65928	89.5252	0.968258
0.471487	0.000517947	40.6677	0.816099	89.1134	0.960655
0.471487	0.000655129	40.41	1.00566	88.6156	0.951436
0.471487	0.000828643	40.1004	1.23268	88.0191	0.940354
0.471487	0.00104811	39.7314	1.50186	87.3116	0.927153
0.471487	0.00132571	39.2966	1.81739	86.4815	0.911592
0.471487	0.00167683	38.7892	2.18287	85.5198	0.893446
0.471487	0.00212095	38.2047	2.60061	84.4197	0.872535
0.471487	0.0026827	37.5398	3.0715	83.1787	0.848737
0.471487	0.00339322	36.7931	3.59466	81.7986	0.821993
0.471487	0.00429193	35.9665	4.16715	80.2866	0.792336
0.471487	0.00542868	35.064	4.78394	78.6556	0.75989
0.471487	0.00686649	34.0927	5.43786	76.9241	0.724878
0.471487	0.00868511	33.0624	6.1197	75.1168	0.687627
0.471487	0.0109854	31.9859	6.81832	73.2636	0.648578
0.471487	0.013895	30.8786	7.52086	71.4	0.608283
0.471487	0.0175751	29.758	8.21316	69.5658	0.567401
0.471487	0.02223	28.6427	8.88018	67.8048	0.526679
0.471487	0.0281177	27.552	9.50646	66.1636	0.486947
0.471487	0.0355648	26.5053	10.0771	64.6875	0.449074
0.471487	0.0449843	25.5192	10.5793	63.4181	0.413863
0.471487	0.0568987	24.6054	11.0044	62.3866	0.381947
0.471487	0.0719686	23.7696	11.3495	61.6069	0.353657
0.471487	0.0910298	23.0095	11.6193	61.0718	0.328925
0.471487	0.11514	22.3163	11.8248	60.7548	0.307297
0.471487	0.145635	21.6777	11.9813	60.6171	0.288079
0.471487	0.184207	21.0813	12.1045	60.6176	0.270501
0.471487	0.232995	20.5165	12.2089	60.7203	0.253859
0.471487	0.294705	19.9756	12.3065	60.8967	0.237565
0.471487	0.372759	19.4537	12.4076	61.1256	0.221151
0.471487	0.471487	18.9477	12.5209	61.3919	0.204229
0.471487	0.596362	18.4561	12.6549	61.6846	0.186467
0.471487	0.754312	17.9785	12.8186	61.9956	0.167545
0.471487	0.954095	17.5148	13.0219	62.3187	0.147132
0.471487	1.20679	17.0659	13.2767	62.6484	0.124883
0.471487	1.52642	16.6328	13.5975	62.9805	0.100406
0.471487	1.9307	16.2167	14.0025	63.3107	0.0732733
0.471487	2.44205	15.8187	14.5142	63.6359	0.0430073
0.471487	3.08884	15.4402	15.1612	63.9527	0.00911823
0.471487	3.90694	15.0824	15.9793	64.2582	-0.0288771
0.471487	4.94171	14.7463	17.0141	64.5501	-0.0714042
0.471487	6.25055	14.4329	18.323	64.8263	-0.118761
0.471487	7.90604	14.1425	19.9785	65.0851	-0.171037
0.471487	10	13.8754	22.0724	65.3256	-0.228026
0.596362	0.0001	48.8103	0.160208	84.1223	0.993457
0.596362	0.000126486	48.7451	0.201487	84.0224	0.991767
0.596362	0.000159986	48.6642	0.253053	83.8971	0.989654
0.596362	0.000202359	48.5628	0.317251	83.7416	0.987019
0.596362	0.000255955	48.4374	0.396892	83.5482	0.983745
0.596362	0.000323746	48.282	0.495237	83.3095	0.979694
0.596362	0.000409492	48.0905	0.616027	83.0167	0.974705
0.596362	0.000517947	47.8564	0.763416	82.6592	0.968596
0.596362	0.000655129	47.5721	0.941944	82.2261	0.961168
0.596362	0.000828643	47.2293	1.15631	81.7061	0.952204
0.596362	0.00104811	46.8202	1.41118	81.0876	0.941483
0.596362	0.00132571	46.3359	1.71098	80.3604	0.928779
0.596362	0.00167683	45.7697	2.05942	79.5151	0.913884
0.596362	0.00212095	45.1153	2.45921	78.545	0.896616
0.596362	0.0026827	44.3684	2.91172	77.447	0.876831
0.596362	0.00339322	43.5272	3.41658	76.2214	0.854439
0.596362	0.00429193	42.5914	3.97177	74.874	0.829403
0.596362	0.00542868	41.566	4.57285	73.4147	0.801779
0.596362	0.00686649	40.4581	5.21345	71.8594	0.771698
0.596362	0.00868511	39.277	5.88539	70.2291	0.739367
0.596362	0.0109854	38.0377	6.57812	68.5498	0.705122
0.596362	0.013895	36.7568	7.27961	66.8524	0.669382
0.596362	0.0175751	35.4533	7.97637	65.1729	0.632677
0.596362	0.02223	34.1496	8.65364	63.5502	0.595655
0.596362	0.0281177	32.8673	9.29631	62.0273	0.559037
0.596362	0.0355648	31.6303	9.88908	60.647	0.52364
0.596362	0.0449843	30.4589	10.4182	59.4509	0.490267
0.596362	0.0568987	29.37	10.8729	58.4727	0.459635
0.596362	0.0719686	28.3731	11.248	57.7328	0.432221
0.596362	0.0910298	27.469	11.5452	57.2319	0.408155
0.596362	0.11514	26.6495	11.7735	56.951	0.387163
0.596362	0.145635	25.9004	11.9473	56.8558	0.368667
0.596362	0.184207	25.2063	12.0827	56.9067	0.351943
0.596362	0.232995	24.5531	12.1952	57.0662	0.336284
0.596362	0.294705	23.9304	12.2981	57.3041	0.321079
0.596362	0.372759	23.3307	12.4025	57.5975	0.305829
0.596362	0.471487	22.7499	12.5178	57.9299	0.290126
0.596362	0.596362	22.1856	12.6531	58.2893	0.273617
0.596362	0.754312	21.6368	12.8175	58.6668	0.255971
0.596362	0.954095	21.1035	13.0213	59.0557	0.236843
0.596362	1.20679	20.5865	13.2763	59.4502	0.215875
0.596362	1.52642	20.0868	13.5973	59.8455	0.192656
0.596362	1.9307	19.6059	14.0024	60.2374	0.16673
0.596362	2.44205	19.1452	14.5142	60.6222	0.137585
0.596362	3.08884	18.7062	15.1611	60.9964	0.104676
0.596362	3.90694	18.2906	15.9793	61.3567	0.0674438
0.596362	4.94171	17.8997	17.0141	61.7005	0.0253643
0.596362	6.25055	17.5345	18.323	62.0256	-0.0219892
0.596362	7.90604	17.1957	19.9785	62.3302	-0.0748566
0.596362	10	16.8836	22.0724	62.6131	-0.133196
0.754312	0.0001	56.7048	0.147349	76.8926	0.994816
0.754312	0.000126486	56.6353	0.185387	76.8085	0.993475
0.754312	0.000159986	56.5486	0.232935	76.7031	0.991795
0.754312	0.000202359	56.4403	0.292203	76.572	0.989699
0.754312	0.000255955	56.3053	0.365809	76.4094	0.98709
0.754312	0.000323746	56.1383	0.456839	76.2081	0.983856
0.754312	0.000409492	55.9323	0.56884	75.9607	0.979865
0.754312	0.000517947	55.6799	0.7058	75.6581	0.974965
0.754312	0.000655129	55.3724	0.872097	75.291	0.968989
0.754312	0.000828643	55.0014	1.07233	74.8487	0.961753
0.754312	0.00104811	54.5564	1.3112	74.3217	0.95306
0.754312	0.00132571	54.0289	1.59316	73.6997	0.942715
0.754312	0.00167683	53.4098	1.92216	72.9742	0.930523
0.754312	0.00212095	52.6917	2.30129	72.1388	0.916306
0.754312	0.0026827	51.8688	2.7324	71.1894	0.899914
0.754312	0.00339322	50.9379	3.21585	70.1256	0.881233
0.754312	0.00429193	49.8985	3.75018	68.951	0.860195
0.754312	0.00542868	48.754	4.33199	67.6734	0.836794
0.754312	0.00686649	47.5112	4.95583	66.3055	0.811088
0.754312	0.00868511	46.1807	5.61427	64.8646	0.783212
0.754312	0.0109854	44.7764	6.298	63.3729	0.753379
0.754312	0.013895	43.3173	6.99564	61.8566	0.721915
0.754312	0.0175751	41.8233	7.69475	60.3468	0.689214
0.754312	0.02223	40.3193	8.38112	58.8778	0.655809
0.754312	0.0281177	38.8311	9.03989	57.4876	0.622323
0.754312	0.0355648	37.3853	9.65585	56.2158	0.589472
0.754312	0.0449843	36.0077	10.2144	55.1021	0.558029
0.754312	0.0568987	34.7205	10.7032	54.1817	0.528738
0.754312	0.0719686	33.539	11.1141	53.4806	0.502204
0.754312	0.0910298	32.469	11.4454	53.0081	0.478741
0.754312	0.11514	31.5047	11.7031	52.7545	0.458286
0.754312	0.145635	30.6316	11.9	52.6922	0.440416
0.754312	0.184207	29.831	12.0522	52.7845	0.424485
0.754312	0.232995	29.0845	12.1761	52.9938	0.409795
0.754312	0.294705	28.3774	12.2864	53.2879	0.39571
0.754312	0.372759	27.6996	12.3954	53.6419	0.381699
0.754312	0.471487	27.0443	12.5136	54.0375	0.367327
0.754312	0.596362	26.408	12.6506	54.4615	0.352223
0.754312	0.754312	25.7889	12.8161	54.9042	0.336038
0.754312	0.954095	25.1867	13.0205	55.3579	0.318428
0.754312	1.20679	24.602	13.2759	55.8166	0.299016
0.754312	1.52642	24.0361	13.5971	56.2751	0.277386
0.754312	1.9307	23.4901	14.0023	56.7289	0.253061
0.754312	2.44205	22.9662	14.5141	57.1739	0.225509
0.754312	3.08884	22.4662	15.1611	57.6061	0.194143
0.754312	3.90694	21.9919	15.9793	58.0222	0.158345
0.754312	4.94171	21.5449	17.0141	58.4192	0.117501
0.754312	6.25055	21.1266	18.323	58.7945	0.0710683
0.754312	7.90604	20.738	19.9785	59.1462	0.0186528
0.754312	10	20.3793	22.0724	59.4731	-0.0398825
0.954095	0.0001	65.0857	0.133706	69.248	0.9959
0.954095	0.000126486	65.0131	0.16829	69.1795	0.994836
0.954095	0.000159986	64.9222	0.211559	69.0937	0.993504
0.954095	0.000202359	64.8086	0.26555	68.9867	0.991839
0.954095	0.000255955	64.6675	0.33269	68.8534	0.989763
0.954095	0.000323746	64.492	0.415858	68.6889	0.987186
0.954095	0.000409492	64.2755	0.518389	68.4859	0.983999
0.954095	0.000517947	64.0096	0.644049	68.2372	0.980077
0.954095	0.000655129	63.6851	0.797028	67.9346	0.975279
0.954095	0.000828643	63.292	0.98181	67.5694	0.969449
0.954095	0.00104811	62.8197	1.20301	67.1325	0.962419
0.954095	0.00132571	62.2578	1.46514	66.615	0.954015
0.954095	0.00167683	61.5957	1.77237	66.0095	0.944061
0.954095	0.00212095	60.824	2.12813	65.3096	0.932389
0.954095	0.0026827	59.9364	2.53473	64.5105	0.918851
0.954095	0.00339322	58.9274	2.99326	63.6111	0.90332
0.954095	0.00429193	57.7958	3.50298	62.6131	0.885708
0.954095	0.00542868	56.5427	4.06157	61.5227	0.865964
0.954095	0.00686649	55.1749	4.66448	60.3492	0.8441
0.954095	0.00868511	53.7022	5.30538	59.1064	0.82018
0.954095	0.0109854	52.1393	5.97594	57.8122	0.794342
0.954095	0.013895	50.5044	6.66611	56.4886	0.766799
0.954095	0.0175751	48.8198	7.3642	55.1613	0.737854
0.954095	0.02223	47.1111	8.05711	53.8598	0.707908
0.954095	0.0281177	45.4077	8.73046	52.6165	0.677475
0.954095	0.0355648	43.7395	9.36935	51.4665	0.647164
0.954095	0.0449843	42.1373	9.95883	50.4462	0.617675
0.954095	0.0568987	40.6291	10.4851	49.5906	0.589738
0.954095	0.0719686	39.2379	10.9374	48.929	0.564033
0.954095	0.0910298	37.9763	11.3102	48.479	0.541042
0.954095	0.11514	36.8446	11.6057	48.2411	0.520924
0.954095	0.145635	35.8301	11.8334	48.1976	0.503459
0.954095	0.184207	34.9118	12.0087	48.317	0.488125
0.954095	0.232995	34.0665	12.1487	48.5633	0.474257
0.954095	0.294705	33.2744	12.2695	48.9026	0.461201
0.954095	0.372759	32.5204	12.3852	49.308	0.44839
0.954095	0.471487	31.7944	12.5075	49.7592	0.43535
0.954095	0.596362	31.0908	12.6471	50.241	0.421686
0.954095	0.754312	30.4064	12.8141	50.7428	0.407037
0.954095	0.954095	29.7403	13.0193	51.2562	0.391045
0.954095	1.20679	29.0926	13.2753	51.7746	0.373332
0.954095	1.52642	28.4646	13.5968	52.2922	0.353478
0.954095	1.9307	27.8577	14.0021	52.8043	0.330999
0.954095	2.44205	27.274	14.514	53.3063	0.30535
0.954095	3.08884	26.7158	15.1611	53.794	0.275921
0.954095	3.90694	26.1852	15.9793	54.2637	0.242049
0.954095	4.94171	25.6842	17.0141	54.712	0.203054
0.954095	6.25055	25.2144	18.323	55.1362	0.158288
0.954095	7.90604	24.7771	19.9785	55.534	0.107219
[truncated: 501 more rows]
