# Supplementary material for: Integrated culturing, modeling and transcriptomics uncovers complex interactions and emergent behavior in a three-species synthetic gut community
Source: eLife journal article supplement (doi:10.7554/elife.37090), 2018-10-15
Supplement: supp [file elife_poa_e37090_Supplementary_File_2.xlsx]

## Sheet: Model parameters
Parameters of model parameterized on mono-cultures (parameterization 1)
Organism	m	K - fructose	K - formate	K - acetate	K - unknown compound	w	a - formate	a - acetate	a - butyrate	n - fructose	n - formate	n - acetate	n - unknown compound
RI	0.76	80.065	0	104.621	0	1.081	0.067		0.625	0.576		1.093	0
FP	2.4	11.418	0	40.866	61.173	0.237	1.684		2.264	1.962		11.443	2.485
BH	2	200	200	0	0	1		0.6	0	3	5		0
Parameters of model parameterized on mono- and bi-cultures (parameterization 2)
Organism	m	K - fructose	K - formate	K - acetate	K - unknown compound	w	a - formate	a - acetate	a - butyrate	n - fructose	n - formate	n - acetate	n - unknown compound
RI	2.125	205.384	0	70.525	0	0.848			0.528	0.364	0.012	1.03	0
FP	2.397	11.418	0	40.866	61.173	0.237	1.684		2.263	1.962		11.443	2.485
BH	1.823	93.661	412.844	0	0	1		0.617	0	0.389	2.516		0
m: maximal growth rate parameter in 1/h
K: Monod constant in mM
w: weight parameter
a: production rate in mM/(10ˆ8 bacterial counts/mL)
a: production rate in mM/(10ˆ8 bacterial counts/mL)
RI: Roseburia intestinalis L1-82
FP: Faecalibacterium prausnitzii A2-165
BH: Blautia hydrogenotrophica S5a33
Parameterization 1: on RI_8, RI_14, FP_4, FP_15 and BH_14
Parameterization 2: on FP_4, FP_15, FP_BH_1, FP_BH_2 and RI_BH_4

## Sheet: Lag phases and init abundances
Lag phases and initial abundances in mono-cultures
Experiment identifier	Lag phase	Initial abundance
RI_8	1	1.469
RI_14	1	2.646
RI_15	1	4.396
FP_4	1e-05	0.006067
FP_14	1e-06	0.01641
FP_15	1e-10	0.01554
BH_14	0.01	0.08502
BH_15	0.01	0.2419
BH_16	0.01	0.3246
Lag phases and initial abundances in co-cultures
Experiment identifier	Lag phase RI	Lag phase FP	Lag phase BH	Initial abundance RI	Initial abundance FP	Initial abundance BH
RI_FP_8	100000	0.001	NA	1.193	0.07072	NA
RI_FP_9	100000	1e-06	NA	1.721	0.07544	NA
RI_BH_4	100000	NA	100000	2.356	NA	0.2373
RI_BH_5	0.1	NA	0.1	1.434	NA	0.2159
RI_BH_6	10	NA	0.1	2.033	NA	0.414
RI_BH_7	0.1	NA	100000	1.791	NA	0.4213
FP_BH_1	NA	0.1	0.001	NA	0.1046	0.3875
FP_BH_2	NA	0.1	0.1	NA	0.07282	0.5162
FP_BH_3	NA	0.1	0.001	NA	0.08005	0.4022
RI_FP_BH_10	1	1e-05	0.1	1.31	0.1106	0.2838
RI_FP_BH_11	1	0.1	0.1	1.878	0.107	0.484
RI_FP_BH_12	1e-05	0.1	0.1	0.2865	0.02245	0.3837
RI_FP_BH_13	1e-05	0.1	0.1	0.00558	0.001368	0.03008
RI_FP_BH_14	1e-05	0.1	0.1	0.007403	0.001864	0.02984
RI_FP_BH_15	1e-05	0.1	0.1	0.007177	0.001541	0.0311
RI: Roseburia intestinalis L1-82
FP: Faecalibacterium prausnitzii A2-165
BH: Blautia hydrogenotrophica S5a33

## Sheet: Predicted max abundances
Predicted maximal abundances in mono-cultures
Experiment identifier	Parameterization 1	Parameterization 2
RI_8	86.8238	132.549
RI_14	90.767	137.975
RI_15	92.4447	139.614
FP_4	12.0785	12.0785
FP_14	12.0888	12.0888
FP_15	12.088	12.088
BH_14	32.5623	147.29
BH_15	33.2058	147.258
BH_16	33.4878	149.97
Predicted maximal abundances in co-cultures
Experiment identifier	RI Parameterization 1	FP Parameterization 1	BH Parameterization 1	RI Parameterization 2	FP Parameterization 2	BH Parameterization 2
RI_FP_8	57.2641	11.1466	NA	102.204	6.85278	NA
RI_FP_9	72.1183	4.33081	NA	119.206	1.89506	NA
RI_BH_4	73.2342	NA	4.05758	101.313	NA	24.3324
RI_BH_5	65.1881	NA	6.64147	68.7306	NA	61.0703
RI_BH_6	74.553	NA	4.50836	108.902	NA	22.1979
RI_BH_7	45.5508	NA	10.8216	43.334	NA	84.6562
FP_BH_1	NA	12.1771	18.0066	NA	12.1659	79.6309
FP_BH_2	NA	12.1442	18.7097	NA	11.4359	86.7008
FP_BH_3	NA	12.1519	15.6067	NA	12.091	71.0967
RI_FP_BH_10	49.1391	7.02681	7.5585	59.9769	4.9572	47.8015
RI_FP_BH_11	38.3182	10.9283	9.55103	48.9763	9.92861	42.2313
RI_FP_BH_12	0.491587	12.0088	16.9782	2.17704	8.39281	94.8636
RI_FP_BH_13	0.0465628	12.0656	18.4386	0.221685	6.74925	108.515
RI_FP_BH_14	0.082093	12.0726	17.4331	0.304186	8.20934	100.776
RI_FP_BH_15	0.077621	12.0712	17.3012	0.292398	7.49957	103.013
RI: Roseburia intestinalis L1-82
FP: Faecalibacterium prausnitzii A2-165
BH: Blautia hydrogenotrophica S5a33
Parameterization 1: on RI_8, RI_14, FP_4, FP_15 and BH_14
Parameterization 2: on FP_4, FP_15, FP_BH_1, FP_BH_2 and RI_BH_4

## Sheet: RMSE and MAE values
RMSE of model fit to mono-cultures						MAE of model fit to mono-cultures
Experiment identifier	RMSE Parameterization 1	RMSE Parameterization 2				Experiment identifier	MAE Parameterization 1	MAE Parameterization 2
RI_8	0.15	0.7399				RI_8	0.11	0.57
RI_14	0.161	0.975				RI_14	0.11	0.782
RI_15	0.218	0.774				RI_15	0.19	0.622
FP_4	0.087	0.0867				FP_4	0.064	0.069
FP_14	0.247	0.246				FP_14	0.17	0.161
FP_15	0.129	0.129				FP_15	0.093	0.09
BH_14	1.509	3.237				BH_14	1.19	2.298
BH_15	1.642	4.68				BH_15	1.38	3.623
BH_16	1.131	2.671				BH_16	0.93	1.95
RMSE of model fit to co-cultures						MAE of model fit to co-cultures
Experiment identifier	RMSE Parameterization 1	RMSE Parameterization 2				Experiment identifier	MAE Parameterization 1	MAE Parameterization 2
RI_FP_8	0.728	0.66				RI_FP_8	0.54	0.521
RI_FP_9	0.808	0.706				RI_FP_9	0.59	0.553
RI_BH_4	1.034	0.335				RI_BH_4	0.78	0.239
RI_BH_5	0.777	0.292				RI_BH_5	0.574	0.203
RI_BH_6	0.519	0.273				RI_BH_6	0.368	0.218
RI_BH_7	1.014	0.345				RI_BH_7	0.778	0.199
FP_BH_1	0.505	0.209				FP_BH_1	0.361	0.144
FP_BH_2	0.7	0.312				FP_BH_2	0.521	0.227
FP_BH_3	0.628	0.461				FP_BH_3	0.448	0.325
RI_FP_BH_10	1.257	0.684				RI_FP_BH_10	0.871	0.445
RI_FP_BH_11	0.872	0.594				RI_FP_BH_11	0.643	0.438
RI_FP_BH_12	0.725	0.515				RI_FP_BH_12	0.463	0.324
RI_FP_BH_13	0.592	0.689				RI_FP_BH_13	0.334	0.445
RI_FP_BH_14	0.764	0.407				RI_FP_BH_14	0.479	0.244
RI_FP_BH_15	0.493	0.566				RI_FP_BH_15	0.279	0.366
RI: Roseburia intestinalis L1-82
FP: Faecalibacterium prausnitzii A2-165
BH: Blautia hydrogenotrophica S5a33
Parameterization 1: on RI_8, RI_14, FP_4, FP_15 and BH_14
Parameterization 2: on FP_4, FP_15, FP_BH_1, FP_BH_2 and RI_BH_4
