# Supplementary material for: Integrated culturing, modeling and transcriptomics uncovers complex interactions and emergent behavior in a three-species synthetic gut community
Source: eLife. 2018 Oct 16;7:e37090. doi: 10.7554/eLife.37090 (PMC6237439; doi:10.7554/eLife.37090)
Supplement: Supplementary file 1. — Fermentation experiments selected for RNA-seq or model parameterization are marked accordingly. [file elife-37090-supp1.xlsx]

## Sheet: Mono- and co-cultures
Mono-cultures
Experiment identifier	Strain	Energy source	Carbon recovery	O/R balance	50 mM Initial Acetic acid	Model parameterization 1	Model parameterization 2	RNA-seq	Remarks
RI_8	Roseburia intestinalis L1-82	50 mM D-Fructose	1.01	0.76	yes	yes	no	no	Measurements of hydrogen concentration not reliable
RI_14	Roseburia intestinalis L1-82	50 mM D-Fructose	0.91	0.66	yes	yes	no	no
RI_15	Roseburia intestinalis L1-82	50 mM D-Fructose	1.03	0.91	yes	no	no	yes
RI_16	Roseburia intestinalis L1-82	50 mM D-Fructose	1.25	1.12	yes	no	no	yes	Bacterial contamination in last time point (16S)
FP_4	Faecalibacterium prausnitzii A2-165	50 mM D-Fructose	0.98	0.95	yes	yes	yes	no
FP_14	Faecalibacterium prausnitzii A2-165	50 mM D-Fructose	0.98	1.07	yes	no	no	yes
FP_15	Faecalibacterium prausnitzii A2-165	50 mM D-Fructose	1.04	1.06	yes	yes	yes	yes
BH_14	Blautia hydrogenotrophica S5a33	50 mM D-Fructose, 50 mM Formate	0.59	0.68	no	yes	no	no
BH_15	Blautia hydrogenotrophica S5a33	50 mM D-Fructose, 50 mM Formate	0.62	0.79	no	no	no	yes
BH_16	Blautia hydrogenotrophica S5a33	50 mM D-Fructose, 50 mM Formate	0.59	0.81	no	no	no	yes	Yeast contamination at 3h and 9h (RNA-seq)
Co-cultures
Experiment identifier	Strains	Energy source	Carbon recovery	O/R balance	50 mM Initial Acetic acid	Model parameterization 1	Model parameterization 2	RNA-seq	Remarks
FP_BH_1	Faecalibacterium prausnitzii A2-165, Blautia hydrogenotrophica S5a33	50 mM D-Fructose	0.98	1.06	yes	no	yes	no
FP_BH_2	Faecalibacterium prausnitzii A2-165, Blautia hydrogenotrophica S5a33	50 mM D-Fructose	0.85	0.7	yes	no	yes	no
FP_BH_3	Faecalibacterium prausnitzii A2-165, Blautia hydrogenotrophica S5a33	50 mM D-Fructose	1.07	1.11	no	no	no	no	Weak bacterial contamination in last time point (16S)
RI_BH_4	Roseburia intestinalis L1-82, Blautia hydrogenotrophica S5a33	50 mM D-Fructose	1	1.02	yes	no	yes	no
RI_BH_5	Roseburia intestinalis L1-82, Blautia hydrogenotrophica S5a33	50 mM D-Fructose	0.91	1.09	no	no	no	no
RI_BH_6	Roseburia intestinalis L1-82, Blautia hydrogenotrophica S5a33	50 mM D-Fructose	1	0.85	yes	no	no	no
RI_BH_7	Roseburia intestinalis L1-82, Blautia hydrogenotrophica S5a33	50 mM D-Fructose	0.92	1.01	no	no	no	no	Weak bacterial contamination in last time point (16S)
RI_FP_8	Roseburia intestinalis L1-82, Faecalibacterium prausnitzii A2-165	50 mM D-Fructose	1.03	0.79	yes	no	no	no
RI_FP_9	Roseburia intestinalis L1-82, Faecalibacterium prausnitzii A2-165	50 mM D-Fructose	1.03	0.79	yes	no	no	no	Bacterial contamination in last time point (16S)
RI_FP_BH_10	Roseburia intestinalis L1-82, Faecalibacterium prausnitzii A2-165, Blautia hydrogenotrophica S5a33	50 mM D-Fructose	1.01	0.98	no	no	no	no	Bacterial contamination in last time point (16S), RI co-abundant with BH
RI_FP_BH_11	Roseburia intestinalis L1-82, Faecalibacterium prausnitzii A2-165, Blautia hydrogenotrophica S5a33	50 mM D-Fructose	0.95	0.89	no	no	no	no	RI co-abundant with BH
RI_FP_BH_12	Roseburia intestinalis L1-82, Faecalibacterium prausnitzii A2-165, Blautia hydrogenotrophica S5a33	50 mM D-Fructose	0.95	0.8	no	no	no	no	FP co-abundant with BH
RI_FP_BH_13	Roseburia intestinalis L1-82, Faecalibacterium prausnitzii A2-165, Blautia hydrogenotrophica S5a33	50 mM D-Fructose	0.94	0.74	no	no	no	no	FP co-abundant with BH
RI_FP_BH_14	Roseburia intestinalis L1-82, Faecalibacterium prausnitzii A2-165, Blautia hydrogenotrophica S5a33	50 mM D-Fructose	0.79	0.85	no	no	no	yes	FP co-abundant with BH
RI_FP_BH_15	Roseburia intestinalis L1-82, Faecalibacterium prausnitzii A2-165, Blautia hydrogenotrophica S5a33	50 mM D-Fructose	0.94	0.78	no	no	no	yes	FP co-abundant with BH

## Sheet: Test mono-cultures
Experiment identifier	Strain	Energy source	Carbon recovery	O/R balance	Initial Acetic acid	Number of time points	qPCR data	Remarks
RI_7	Roseburia intestinalis L1-82	80 mM D-Fructose	0.97	0.7	50 mM	16	no	hydrogen measurements unreliable
RI_9	Roseburia intestinalis L1-82	80 mM D-Fructose	0.89	0.72	80 mM	16	no	hydrogen measurements unreliable
RI_10	Roseburia intestinalis L1-82	80 mM D-Fructose	0.9	0.66	80 mM	16	no	hydrogen measurements unreliable
FP_5	Faecalibacterium prausnitzii A2-165	50 mM D-Fructose	0.97	1.34	50 mM	18	yes	50mM filter-sterilized distilled water added after 16.5h
FP_6	Faecalibacterium prausnitzii A2-165	50 mM D-Fructose	0.94	1.07	50 mM	18	no	50 ml autoclaved 2 times concentrated mMCB and acetate added after 16.5h
FP_7	Faecalibacterium prausnitzii A2-165	50 mM D-Fructose	1	1.25	50 mM	14	yes	30 mM initial butyrate added
FP_8	Faecalibacterium prausnitzii A2-165	25 mM D-Fructose	1.03	1.26	25 mM	17	no
FP_9	Faecalibacterium prausnitzii A2-165	50 mM D-Fructose	0.97	1.04	50 mM	4	yes	pH 5.8
FP_10	Faecalibacterium prausnitzii A2-165	50 mM D-Fructose	1	1.07	50 mM	4	yes	Continuous addition of potassium ferrocyanide trihydrate (2g/l solution in 250 ml bottle, flow rate = 4.5 ml/ 100 min)
FP_12	Faecalibacterium prausnitzii A2-165	50 mM D-Fructose	1.1	1.1	50 mM	17	yes	6 g of granulated yeast extract instead of 3 g
BH_1	Blautia hydrogenotrophica S5a33	50 mM D-Fructose	0.65	1.5	no	17	no	hydrogen measurements unreliable
BH_2	Blautia hydrogenotrophica S5a33	300 mM Formate	1.12	0.73	no	19	no	hydrogen measurements unreliable
BH_5	Blautia hydrogenotrophica S5a33	140 mM Formate	1.23	0.84	no	12	no	hydrogen measurements unreliable
BH_6	Blautia hydrogenotrophica S5a33	140 mM Formate	1.21	0.76	no	12	no	hydrogen measurements unreliable

## Sheet: Screening
Experiment identifier	Strain	Energy source	Remark
BH_Fructose_S2	Blautia hydrogenotrophica S5a33	55 mM D-Fructose
BH_Glucose_S2	Blautia hydrogenotrophica S5a33	55 mM D-Glucose
BH_Galactose_S2	Blautia hydrogenotrophica S5a33	55 mM D-Galactose
BH_Fucose_S2	Blautia hydrogenotrophica S5a33	56 mM L-Fucose
BH_Formate_S2	Blautia hydrogenotrophica S5a33	50 mM Sodium formate
BH_Acetate_S2	Blautia hydrogenotrophica S5a33	54 mM Sodium acetate trihydrate
BH_Lactate_S2	Blautia hydrogenotrophica S5a33	74 mM Lactate
BH_Oligofructose_S2	Blautia hydrogenotrophica S5a33	49 mM Oligofructose
BH_Inulin_S2	Blautia hydrogenotrophica S5a33	51 mM Inulin
BH_NoSubstrate_S2	Blautia hydrogenotrophica S5a33	None	Autotrophic growth on 10% CO2 and 10% H2 in the headspace
BH_Fructose_S3	Blautia hydrogenotrophica S5a33	57 mM D-Fructose
BH_Fructose_S3_replicate	Blautia hydrogenotrophica S5a33	54 mM D-Fructose
BH_Glucose_S3	Blautia hydrogenotrophica S5a33	60 mM D-Glucose
BH_Glucose_S3_replicate	Blautia hydrogenotrophica S5a33	59 mM D-Glucose
BH_Galactose_S3	Blautia hydrogenotrophica S5a33	58 mM D-Galactose
BH_Fucose_S3	Blautia hydrogenotrophica S5a33	57 mM L-Fucose
BH_Formate_S3	Blautia hydrogenotrophica S5a33	52 mM Sodium formate
BH_Acetate_S3	Blautia hydrogenotrophica S5a33	61 mM Sodium acetate trihydrate
BH_Lactate_S3	Blautia hydrogenotrophica S5a33	57 mM Lactate
BH_Oligofructose_S3	Blautia hydrogenotrophica S5a33	50 mM Oligofructose
BH_Inulin_S3	Blautia hydrogenotrophica S5a33	50 mM Inulin
BH_NoSubstrate_S3	Blautia hydrogenotrophica S5a33	None	Autotrophic growth on 10% CO2 and 10% H2 in the headspace
BH_GC-FID	Blautia hydrogenotrophica S5a33	350 mM Formate	GC-FID results for ethanol, acetoin, acetic acid, propionic acid, butyric acid, isobutyric acid and isovaleric acid
