# Supplementary material for: Integrated culturing, modeling and transcriptomics uncovers complex interactions and emergent behavior in a three-species synthetic gut community
Source: eLife. 2018 Oct 16;7:e37090. doi: 10.7554/eLife.37090 (PMC6237439; doi:10.7554/eLife.37090)
Supplement: Supplementary file 3. [file elife-37090-supp3.xlsx]

## Sheet: triculture vs monoculture
Strain	Locus_tag	Log2 Fold Change	P-value	Benjamini-Hochberg adjusted P-value	COG_categories	COG_numbers	KO_numbers	COG_annotations
B. hydrogenotrophica S5a33	RUMHYD_RS08885	-2.92583	1.47785e-05	0.000931048
B. hydrogenotrophica S5a33	RUMHYD_RS17560	-2.88364	0.000105657	0.0038728
B. hydrogenotrophica S5a33	RUMHYD_RS17575	-2.87059	2.09771e-05	0.00117472
B. hydrogenotrophica S5a33	RUMHYD_RS08845	-2.84316	2.08687e-09	5.22487e-07
B. hydrogenotrophica S5a33	RUMHYD_RS17590	-2.78444	2.82011e-06	0.000247189	[X] Mobilome: prophages, transposons	COG3561		Phage anti-repressor protein
B. hydrogenotrophica S5a33	RUMHYD_RS14875	-2.72793	0.000954255	0.0184979
B. hydrogenotrophica S5a33	RUMHYD_RS00995	-2.71174	0.00105551	0.0198871
B. hydrogenotrophica S5a33	RUMHYD_RS08825	-2.60881	2.86892e-08	5.78374e-06	[R] General function prediction only	COG1724		Predicted RNA binding protein YcfA, dsRBD-like fold, HicA-like mRNA interferase family
B. hydrogenotrophica S5a33	RUMHYD_RS08905	-2.5424	0.000254042	0.00775982
B. hydrogenotrophica S5a33	RUMHYD_RS08695	-2.50686	0.000297728	0.00857457
B. hydrogenotrophica S5a33	RUMHYD_RS14870	-2.47316	5.35827e-05	0.0024005
B. hydrogenotrophica S5a33	RUMHYD_RS14965	-2.47124	1.88524e-05	0.00111784	[L] Replication, recombination and repair	COG4974		Site-specific recombinase XerD
B. hydrogenotrophica S5a33	RUMHYD_RS08895	-2.43095	0.00318153	0.0413805
B. hydrogenotrophica S5a33	RUMHYD_RS08705	-2.34987	0.000120304	0.00418161
B. hydrogenotrophica S5a33	RUMHYD_RS14775	-2.34984	0.00109678	0.0204733
B. hydrogenotrophica S5a33	RUMHYD_RS08780	-2.33344	0.000400435	0.0102187
B. hydrogenotrophica S5a33	RUMHYD_RS08715	-2.32636	0.000321267	0.00912218
B. hydrogenotrophica S5a33	RUMHYD_RS08650	-2.32564	0.000382172	0.00987768
B. hydrogenotrophica S5a33	RUMHYD_RS08495	-2.30782	1.01703e-05	0.000732264
B. hydrogenotrophica S5a33	RUMHYD_RS12810	-2.30144	1.8808e-10	7.58339e-08	[R] General function prediction only	COG1724		Predicted RNA binding protein YcfA, dsRBD-like fold, HicA-like mRNA interferase family
B. hydrogenotrophica S5a33	RUMHYD_RS08785	-2.286	0.000185661	0.00613594
B. hydrogenotrophica S5a33	RUMHYD_RS08890	-2.27819	0.000547664	0.0127378
B. hydrogenotrophica S5a33	RUMHYD_RS07520	-2.27745	0.000154097	0.00526542	[Q] Secondary metabolites biosynthesis, transport and catabolism	COG3653	KO:K01465 - KO:K06015	N-acyl-D-aspartate/D-glutamate deacylase
B. hydrogenotrophica S5a33	RUMHYD_RS14085	-2.24548	2.87184e-07	3.40566e-05	[M] Cell wall/membrane/envelope biogenesis	COG1136	KO:K02003	ABC-type lipoprotein export system, ATPase component
B. hydrogenotrophica S5a33	RUMHYD_RS14715	-2.22623	8.11697e-06	0.000606067
B. hydrogenotrophica S5a33	RUMHYD_RS08690	-2.2253	0.000367083	0.00961089
B. hydrogenotrophica S5a33	RUMHYD_RS08875	-2.22108	1.41314e-10	7.12222e-08
B. hydrogenotrophica S5a33	RUMHYD_RS08480	-2.21939	9.68917e-08	1.30223e-05
B. hydrogenotrophica S5a33	RUMHYD_RS08765	-2.21707	0.000423501	0.0106722
B. hydrogenotrophica S5a33	RUMHYD_RS08700	-2.20655	0.000196035	0.00637429
B. hydrogenotrophica S5a33	RUMHYD_RS17580	-2.20028	0.00118271	0.0214805
B. hydrogenotrophica S5a33	RUMHYD_RS14865	-2.18948	0.000549697	0.0127378
B. hydrogenotrophica S5a33	RUMHYD_RS08775	-2.18248	0.00334645	0.042971
B. hydrogenotrophica S5a33	RUMHYD_RS08710	-2.18003	0.000479852	0.011381
B. hydrogenotrophica S5a33	RUMHYD_RS08770	-2.17713	0.000630489	0.0139677	[X] Mobilome: prophages, transposons	COG3646		Phage regulatory protein Rha
B. hydrogenotrophica S5a33	RUMHYD_RS14710	-2.15951	5.51269e-05	0.002416	[K] Transcription	COG1476		DNA-binding transcriptional regulator, XRE-family HTH domain
B. hydrogenotrophica S5a33	RUMHYD_RS08660	-2.13398	0.0017299	0.0274605
B. hydrogenotrophica S5a33	RUMHYD_RS08655	-2.11267	0.000890829	0.017607
B. hydrogenotrophica S5a33	RUMHYD_RS08530	-2.10292	0.00122169	0.0219904
B. hydrogenotrophica S5a33	RUMHYD_RS08835	-2.0857	8.50075e-05	0.0033603
B. hydrogenotrophica S5a33	RUMHYD_RS17585	-2.0825	4.48858e-12	6.77401e-09
B. hydrogenotrophica S5a33	RUMHYD_RS14780	-2.06488	0.000720485	0.0154329
B. hydrogenotrophica S5a33	RUMHYD_RS14920	-2.02785	0.00285548	0.0383777
B. hydrogenotrophica S5a33	RUMHYD_RS13165	-2.02375	0.00205123	0.0318099	[C] Energy production and conversion	COG1014	KO:K00180	Pyruvate:ferredoxin oxidoreductase or related 2-oxoacid:ferredoxin oxidoreductase, gamma subunit
B. hydrogenotrophica S5a33	RUMHYD_RS08685	-2.01774	0.00233606	0.0339969
B. hydrogenotrophica S5a33	RUMHYD_RS08680	-2.00639	0.00283933	0.0383777
B. hydrogenotrophica S5a33	RUMHYD_RS17600	-1.94346	0.00269354	0.0374495
B. hydrogenotrophica S5a33	RUMHYD_RS14730	-1.93754	0.000282098	0.00830316
B. hydrogenotrophica S5a33	RUMHYD_RS08615	-1.92733	0.00259028	0.0367747
B. hydrogenotrophica S5a33	RUMHYD_RS08790	-1.92289	0.00281513	0.0383777
B. hydrogenotrophica S5a33	RUMHYD_RS12655	-1.91668	1.21652e-06	0.000122625			KO:K07339
B. hydrogenotrophica S5a33	RUMHYD_RS08820	-1.90855	2.026e-06	0.000185655	[V] Defense mechanisms	COG1598		Predicted nuclease of the RNAse H fold, HicB family
B. hydrogenotrophica S5a33	RUMHYD_RS08665	-1.90769	0.00373928	0.0465225
B. hydrogenotrophica S5a33	RUMHYD_RS17565	-1.90309	0.00211224	0.0320172
B. hydrogenotrophica S5a33	RUMHYD_RS14740	-1.89704	0.000819969	0.0165306
B. hydrogenotrophica S5a33	RUMHYD_RS08830	-1.82765	0.00022642	0.0070225
B. hydrogenotrophica S5a33	RUMHYD_RS08525	-1.82154	0.00240548	0.0343933
B. hydrogenotrophica S5a33	RUMHYD_RS12830	-1.78952	3.43801e-05	0.00169049
B. hydrogenotrophica S5a33	RUMHYD_RS06990	-1.7625	0.00226982	0.0336043
B. hydrogenotrophica S5a33	RUMHYD_RS14725	-1.74075	0.000362981	0.00961089
B. hydrogenotrophica S5a33	RUMHYD_RS08850	-1.7336	1.1556e-05	0.00077656
B. hydrogenotrophica S5a33	RUMHYD_RS08880	-1.70383	1.12615e-05	0.00077656
B. hydrogenotrophica S5a33	RUMHYD_RS08805	-1.64715	0.000364104	0.00961089
B. hydrogenotrophica S5a33	RUMHYD_RS14090	-1.63201	0.000471188	0.011381			KO:K02004
B. hydrogenotrophica S5a33	RUMHYD_RS17605	-1.62458	2.64509e-05	0.00144122	[V] Defense mechanisms - [F] Nucleotide transport and metabolism	COG0737		2',3'-cyclic-nucleotide 2'-phosphodiesterase/5'- or 3'-nucleotidase, 5'-nucleotidase family
B. hydrogenotrophica S5a33	RUMHYD_RS14785	-1.5933	0.00372676	0.0465225
B. hydrogenotrophica S5a33	RUMHYD_RS14735	-1.57751	0.00170585	0.0272937
B. hydrogenotrophica S5a33	RUMHYD_RS14940	-1.57092	0.000727246	0.0154329	[L] Replication, recombination and repair	COG1484	KO:K02315	DNA replication protein DnaC
B. hydrogenotrophica S5a33	RUMHYD_RS08810	-1.52398	0.00148644	0.0251821	[V] Defense mechanisms	COG2026	KO:K06218	mRNA-degrading endonuclease RelE, toxin component of the RelBE toxin-antitoxin system
B. hydrogenotrophica S5a33	RUMHYD_RS12815	-1.50215	0.000200931	0.00642981	[V] Defense mechanisms	COG1598		Predicted nuclease of the RNAse H fold, HicB family
B. hydrogenotrophica S5a33	RUMHYD_RS12835	-1.46357	0.00162892	0.0266985
B. hydrogenotrophica S5a33	RUMHYD_RS15990	-1.45347	0.000556548	0.01275	[K] Transcription	COG1278	KO:K03704	Cold shock protein, CspA family
B. hydrogenotrophica S5a33	RUMHYD_RS17805	-1.38853	0.00152491	0.0256185
B. hydrogenotrophica S5a33	RUMHYD_RS14705	-1.2904	3.14518e-05	0.00162582	[K] Transcription - [T] Signal transduction mechanisms	COG1974	KO:K01356	SOS-response transcriptional repressor LexA (RecA-mediated autopeptidase)
B. hydrogenotrophica S5a33	RUMHYD_RS16025	-1.22588	0.00234403	0.0339969
B. hydrogenotrophica S5a33	RUMHYD_RS04970	-1.19579	0.000476652	0.011381	[C] Energy production and conversion	COG0280	KO:K00634	Phosphotransacetylase
B. hydrogenotrophica S5a33	RUMHYD_RS13445	-1.18884	0.000963511	0.0184994	[C] Energy production and conversion	COG3426	KO:K00929	Butyrate kinase
B. hydrogenotrophica S5a33	RUMHYD_RS12720	-1.16762	0.00341862	0.0436198
B. hydrogenotrophica S5a33	RUMHYD_RS12660	-1.15335	0.00141411	0.0245763
B. hydrogenotrophica S5a33	RUMHYD_RS17685	-1.1295	0.0029053	0.0387886
B. hydrogenotrophica S5a33	RUMHYD_RS08490	-1.11634	0.0020915	0.0319429
B. hydrogenotrophica S5a33	RUMHYD_RS12685	-1.08899	0.00114097	0.0210514
B. hydrogenotrophica S5a33	RUMHYD_RS14525	-1.08403	0.000477996	0.011381	[I] Lipid transport and metabolism	COG0446		NADPH-dependent 2,4-dienoyl-CoA reductase, sulfur reductase, or a related oxidoreductase
B. hydrogenotrophica S5a33	RUMHYD_RS04980	-1.06982	0.00124868	0.0220897	[C] Energy production and conversion	COG1014	KO:K00180	Pyruvate:ferredoxin oxidoreductase or related 2-oxoacid:ferredoxin oxidoreductase, gamma subunit
B. hydrogenotrophica S5a33	RUMHYD_RS15420	-1.01438	0.000747013	0.0156873
B. hydrogenotrophica S5a33	RUMHYD_RS05660	-0.91542	0.00164331	0.0267171	[J] Translation, ribosomal structure and biogenesis	COG0102	KO:K02871	Ribosomal protein L13
B. hydrogenotrophica S5a33	RUMHYD_RS14520	-0.906013	0.00124912	0.0220897	[P] Inorganic ion transport and metabolism	COG2221		Dissimilatory sulfite reductase (desulfoviridin), alpha and beta subunits
B. hydrogenotrophica S5a33	RUMHYD_RS16035	-0.870292	6.40668e-05	0.00270813	[L] Replication, recombination and repair	COG4974		Site-specific recombinase XerD
B. hydrogenotrophica S5a33	RUMHYD_RS04990	-0.827189	0.0021844	0.0326203	[C] Energy production and conversion	COG3426	KO:K00929	Butyrate kinase
B. hydrogenotrophica S5a33	RUMHYD_RS16310	-0.783973	0.00156595	0.0258767	[E] Amino acid transport and metabolism	COG0079	KO:K00817	Histidinol-phosphate/aromatic aminotransferase or cobyric acid decarboxylase
B. hydrogenotrophica S5a33	RUMHYD_RS02540	-0.63274	0.000877965	0.0175245	[I] Lipid transport and metabolism	COG1502	KO:K06131	Phosphatidylserine/phosphatidylglycerophosphate/cardiolipin synthase or related enzyme
B. hydrogenotrophica S5a33	RUMHYD_RS13745	0.70211	0.00228362	0.0336043	[E] Amino acid transport and metabolism - [R] General function prediction only	COG0493	KO:K00266	NADPH-dependent glutamate synthase beta chain or related oxidoreductase
B. hydrogenotrophica S5a33	RUMHYD_RS17435	0.790056	0.00359721	0.0453248	[M] Cell wall/membrane/envelope biogenesis - [I] Lipid transport and metabolism	COG1887		CDP-glycerol glycerophosphotransferase, TagB/SpsB family
B. hydrogenotrophica S5a33	RUMHYD_RS01415	0.807755	0.000758417	0.0157626			KO:K00194
B. hydrogenotrophica S5a33	RUMHYD_RS14480	0.809732	0.0030721	0.0402166
B. hydrogenotrophica S5a33	RUMHYD_RS08155	0.815355	0.000284186	0.00830316
B. hydrogenotrophica S5a33	RUMHYD_RS02430	0.817558	0.000329197	0.00914228	[C] Energy production and conversion	COG1883	KO:K01572	Na+-transporting methylmalonyl-CoA/oxaloacetate decarboxylase, beta subunit
B. hydrogenotrophica S5a33	RUMHYD_RS07650	0.884742	0.00376149	0.0465225	[G] Carbohydrate transport and metabolism	COG0149	KO:K01803	Triosephosphate isomerase
B. hydrogenotrophica S5a33	RUMHYD_RS00290	0.898757	0.00137291	0.0240677
B. hydrogenotrophica S5a33	RUMHYD_RS02445	1.01888	0.000331045	0.00914228	[I] Lipid transport and metabolism	COG4799		Acetyl-CoA carboxylase, carboxyltransferase component
B. hydrogenotrophica S5a33	RUMHYD_RS03280	1.02688	0.0015581	0.0258767	[E] Amino acid transport and metabolism - [C] Energy production and conversion	COG0473	KO:K00052	Isocitrate/isopropylmalate dehydrogenase
B. hydrogenotrophica S5a33	RUMHYD_RS16570	1.05749	0.000794272	0.0163393	[S] Function unknown	COG3883		Uncharacterized N-terminal domain of peptidoglycan hydrolase CwlO
B. hydrogenotrophica S5a33	RUMHYD_RS12030	1.08085	0.00237602	0.0342148	[K] Transcription	COG0583		DNA-binding transcriptional regulator, LysR family
B. hydrogenotrophica S5a33	RUMHYD_RS03295	1.10469	0.00189384	0.0298279	[R] General function prediction only	COG3581		Predicted nucleotide-binding protein, sugar kinase/HSP70/actin superfamily
B. hydrogenotrophica S5a33	RUMHYD_RS14430	1.15927	0.00333617	0.042971
B. hydrogenotrophica S5a33	RUMHYD_RS03195	1.18243	0.00114864	0.0210514	[G] Carbohydrate transport and metabolism	COG1080	KO:K08483	Phosphoenolpyruvate-protein kinase (PTS system EI component in bacteria)
B. hydrogenotrophica S5a33	RUMHYD_RS00280	1.2055	0.00195135	0.0304955	[V] Defense mechanisms - [M] Cell wall/membrane/envelope biogenesis	COG0845	KO:K02005	Multidrug efflux pump subunit AcrA (membrane-fusion protein)
B. hydrogenotrophica S5a33	RUMHYD_RS08165	1.22858	0.00394038	0.0484379	[T] Signal transduction mechanisms	COG2205	KO:K07646	K+-sensing histidine kinase KdpD
B. hydrogenotrophica S5a33	RUMHYD_RS10465	1.26176	0.00295003	0.0391266	[R] General function prediction only	COG5496		Predicted thioesterase
B. hydrogenotrophica S5a33	RUMHYD_RS04855	1.29237	0.00208594	0.0319429
B. hydrogenotrophica S5a33	RUMHYD_RS00925	1.39551	1.53222e-05	0.000936047	[P] Inorganic ion transport and metabolism	COG0310	KO:K02007	ABC-type Co2+ transport system, permease component
B. hydrogenotrophica S5a33	RUMHYD_RS03320	1.46414	0.00212991	0.0320441
B. hydrogenotrophica S5a33	RUMHYD_RS03470	1.49129	0.00347277	0.0440321	[T] Signal transduction mechanisms	COG0642		Signal transduction histidine kinase
B. hydrogenotrophica S5a33	RUMHYD_RS02845	1.54101	0.000275315	0.0082841	[E] Amino acid transport and metabolism	COG0747	KO:K02035	ABC-type transport system, periplasmic component
B. hydrogenotrophica S5a33	RUMHYD_RS05315	1.54488	0.00147283	0.0251629
B. hydrogenotrophica S5a33	RUMHYD_RS02855	1.67592	0.00280577	0.0383777	[P] Inorganic ion transport and metabolism - [E] Amino acid transport and metabolism	COG0601	KO:K02033	ABC-type dipeptide/oligopeptide/nickel transport system, permease component
B. hydrogenotrophica S5a33	RUMHYD_RS07895	1.72458	8.92433e-05	0.00339461
B. hydrogenotrophica S5a33	RUMHYD_RS07905	1.7466	4.72492e-05	0.00221522
B. hydrogenotrophica S5a33	RUMHYD_RS07900	1.78349	8.44807e-08	1.21652e-05
B. hydrogenotrophica S5a33	RUMHYD_RS16530	1.83482	0.000909607	0.0178036	[N] Cell motility	COG3225	KO:K01992	ABC-type uncharacterized transport system involved in gliding motility, auxiliary component
B. hydrogenotrophica S5a33	RUMHYD_RS03350	1.83501	0.000347577	0.00946913	[F] Nucleotide transport and metabolism	COG0504	KO:K01937	CTP synthase (UTP-ammonia lyase)
B. hydrogenotrophica S5a33	RUMHYD_RS07145	1.83719	0.00264275	0.0372572	[K] Transcription	COG1802		DNA-binding transcriptional regulator, GntR family
B. hydrogenotrophica S5a33	RUMHYD_RS03475	1.86705	4.89699e-05	0.00224371
B. hydrogenotrophica S5a33	RUMHYD_RS03355	1.88535	0.000599968	0.0134393	[E] Amino acid transport and metabolism	COG0367	KO:K01953	Asparagine synthetase B (glutamine-hydrolyzing)
B. hydrogenotrophica S5a33	RUMHYD_RS00905	1.89542	0.000707582	0.0153386	[H] Coenzyme transport and metabolism	COG4822	KO:K02190	Cobalamin biosynthesis protein CbiK, Co2+ chelatase
B. hydrogenotrophica S5a33	RUMHYD_RS07910	1.90271	0.000473786	0.011381
B. hydrogenotrophica S5a33	RUMHYD_RS07920	1.92026	3.36992e-06	0.00027175
B. hydrogenotrophica S5a33	RUMHYD_RS09855	1.92677	7.19486e-05	0.00292867	[S] Function unknown	COG3212		Uncharacterized membrane protein YkoI
B. hydrogenotrophica S5a33	RUMHYD_RS07925	1.93218	2.72321e-05	0.00144474
B. hydrogenotrophica S5a33	RUMHYD_RS07890	1.94087	5.78314e-07	6.13621e-05
B. hydrogenotrophica S5a33	RUMHYD_RS07825	1.9663	5.12809e-08	8.29868e-06
B. hydrogenotrophica S5a33	RUMHYD_RS07850	1.9833	0.00100354	0.0190862
B. hydrogenotrophica S5a33	RUMHYD_RS07760	2.06217	0.00166546	0.0268605
B. hydrogenotrophica S5a33	RUMHYD_RS16715	2.07064	3.38152e-05	0.00169049	[P] Inorganic ion transport and metabolism	COG1116		ABC-type nitrate/sulfonate/bicarbonate transport system, ATPase component
B. hydrogenotrophica S5a33	RUMHYD_RS07745	2.08714	0.0028369	0.0383777
B. hydrogenotrophica S5a33	RUMHYD_RS07935	2.09543	0.000812792	0.0165306
B. hydrogenotrophica S5a33	RUMHYD_RS14195	2.09892	0.000100664	0.00375814	[O] Posttranslational modification, protein turnover, chaperones	COG0492	KO:K00384	Thioredoxin reductase
B. hydrogenotrophica S5a33	RUMHYD_RS07955	2.10204	1.51332e-06	0.000145278
B. hydrogenotrophica S5a33	RUMHYD_RS03360	2.1572	3.0283e-06	0.000254377	[E] Amino acid transport and metabolism	COG3968	KO:K01915	Glutamine synthetase type III
B. hydrogenotrophica S5a33	RUMHYD_RS07835	2.17249	0.000591427	0.0133968
B. hydrogenotrophica S5a33	RUMHYD_RS07810	2.18	1.17044e-07	1.47475e-05
B. hydrogenotrophica S5a33	RUMHYD_RS07950	2.19943	3.5265e-05	0.00169272
B. hydrogenotrophica S5a33	RUMHYD_RS07735	2.21856	0.00269073	0.0374495
B. hydrogenotrophica S5a33	RUMHYD_RS07820	2.22243	7.26357e-05	0.00292867
B. hydrogenotrophica S5a33	RUMHYD_RS07790	2.2731	2.33253e-09	5.22487e-07			KO:K07474
B. hydrogenotrophica S5a33	RUMHYD_RS07845	2.29489	5.58201e-06	0.00043282
B. hydrogenotrophica S5a33	RUMHYD_RS07780	2.35959	0.00011578	0.00409496
B. hydrogenotrophica S5a33	RUMHYD_RS03755	2.36077	1.35462e-11	9.10303e-09	[M] Cell wall/membrane/envelope biogenesis	COG3409		Peptidoglycan-binding (PGRP) domain of peptidoglycan hydrolases
B. hydrogenotrophica S5a33	RUMHYD_RS16535	2.36903	0.000184104	0.00613594			KO:K01992
B. hydrogenotrophica S5a33	RUMHYD_RS07840	2.39842	5.35133e-08	8.29868e-06
B. hydrogenotrophica S5a33	RUMHYD_RS14190	2.43056	0.000226168	0.0070225	[V] Defense mechanisms	COG0450	KO:K03386	Alkyl hydroperoxide reductase subunit AhpC (peroxiredoxin)
B. hydrogenotrophica S5a33	RUMHYD_RS07915	2.4531	1.47389e-09	4.24481e-07
B. hydrogenotrophica S5a33	RUMHYD_RS17660	2.47316	0.00298297	0.039305
B. hydrogenotrophica S5a33	RUMHYD_RS07870	2.50045	2.05152e-05	0.00117472
B. hydrogenotrophica S5a33	RUMHYD_RS07880	2.62216	6.44794e-05	0.00270813
B. hydrogenotrophica S5a33	RUMHYD_RS07940	2.63682	6.72025e-12	6.77401e-09	[X] Mobilome: prophages, transposons	COG5412		Phage-related protein
B. hydrogenotrophica S5a33	RUMHYD_RS07930	2.64699	5.72897e-07	6.13621e-05
B. hydrogenotrophica S5a33	RUMHYD_RS07875	2.69699	0.00146356	0.0251629
B. hydrogenotrophica S5a33	RUMHYD_RS18015	2.85785	4.5037e-10	1.51324e-07	[X] Mobilome: prophages, transposons	COG1783		Phage terminase large subunit
B. hydrogenotrophica S5a33	RUMHYD_RS07860	2.90352	1.23891e-05	0.00080569
B. hydrogenotrophica S5a33	RUMHYD_RS07865	2.98859	8.77847e-05	0.00339461
B. hydrogenotrophica S5a33	RUMHYD_RS07945	3.13169	3.75295e-08	6.87813e-06
B. hydrogenotrophica S5a33	RUMHYD_RS04890	3.67989	0.000655353	0.0143608	[C] Energy production and conversion	COG0716		Flavodoxin
B. hydrogenotrophica S5a33	RUMHYD_RS04895	3.69192	0.00011023	0.00396829
F. prausnitzii A2-165	FAEPRAA2165_RS13240	-6.8805	1.8032e-19	3.62721e-17
F. prausnitzii A2-165	FAEPRAA2165_RS12165	-6.77076	4.52007e-61	1.182e-57	[H] Coenzyme transport and metabolism	COG4822		Cobalamin biosynthesis protein CbiK, Co2+ chelatase
F. prausnitzii A2-165	FAEPRAA2165_RS13245	-5.41207	1.31129e-09	1.27001e-07	[M] Cell wall/membrane/envelope biogenesis	COG0451	KO:K00091	Nucleoside-diphosphate-sugar epimerase
F. prausnitzii A2-165	FAEPRAA2165_RS12160	-5.05606	1.05588e-41	1.38056e-38
F. prausnitzii A2-165	FAEPRAA2165_RS12155	-4.81604	5.92755e-33	5.16685e-30	[P] Inorganic ion transport and metabolism	COG0614	KO:K02016	ABC-type Fe3+-hydroxamate transport system, periplasmic component
F. prausnitzii A2-165	FAEPRAA2165_RS12150	-4.76281	1.89039e-23	5.49263e-21	[P] Inorganic ion transport and metabolism	COG0609	KO:K02015	ABC-type Fe3+-siderophore transport system, permease component
F. prausnitzii A2-165	FAEPRAA2165_RS13250	-4.65279	3.73014e-07	2.70953e-05	[R] General function prediction only - [I] Lipid transport and metabolism - [Q] Secondary metabolites biosynthesis, transport and catabolism	COG1028		NAD(P)-dependent dehydrogenase, short-chain alcohol dehydrogenase family
F. prausnitzii A2-165	FAEPRAA2165_RS12130	-4.53392	2.57272e-29	1.68192e-26	[H] Coenzyme transport and metabolism	COG1010	KO:K05934	Precorrin-3B methylase
F. prausnitzii A2-165	FAEPRAA2165_RS12145	-4.52178	9.9391e-24	3.24884e-21	[H] Coenzyme transport and metabolism	COG1903	KO:K02188	Cobalamin biosynthesis protein CbiD
F. prausnitzii A2-165	FAEPRAA2165_RS12125	-4.46089	5.17588e-28	2.70699e-25	[H] Coenzyme transport and metabolism	COG2099	KO:K05895	Precorrin-6x reductase
F. prausnitzii A2-165	FAEPRAA2165_RS12070	-4.4303	2.2493e-24	8.40276e-22	[H] Coenzyme transport and metabolism	COG1492	KO:K02232	Cobyric acid synthase
F. prausnitzii A2-165	FAEPRAA2165_RS12140	-4.4202	1.10285e-26	4.80658e-24	[H] Coenzyme transport and metabolism	COG2875	KO:K05936	Precorrin-4 methylase
F. prausnitzii A2-165	FAEPRAA2165_RS12135	-4.39162	1.05504e-16	1.6229e-14	[H] Coenzyme transport and metabolism	COG2073	KO:K02189	Cobalamin biosynthesis protein CbiG
F. prausnitzii A2-165	FAEPRAA2165_RS12065	-4.35564	3.37159e-16	4.89818e-14	[H] Coenzyme transport and metabolism	COG2082	KO:K06042	Precorrin isomerase
F. prausnitzii A2-165	FAEPRAA2165_RS12120	-4.34902	5.90389e-20	1.28656e-17	[H] Coenzyme transport and metabolism	COG2242	KO:K00595	Precorrin-6B methylase 2
F. prausnitzii A2-165	FAEPRAA2165_RS12080	-4.32659	3.89643e-19	7.27797e-17	[H] Coenzyme transport and metabolism	COG1270	KO:K02227	Cobalamin biosynthesis protein CobD/CbiB
F. prausnitzii A2-165	FAEPRAA2165_RS12115	-4.28553	3.2487e-22	8.49536e-20	[H] Coenzyme transport and metabolism	COG1797	KO:K02224	Cobyrinic acid a,c-diamide synthase
F. prausnitzii A2-165	FAEPRAA2165_RS02110	-4.26001	0.00153226	0.0170505
F. prausnitzii A2-165	FAEPRAA2165_RS12075	-4.19149	4.59897e-18	8.01754e-16	[E] Amino acid transport and metabolism	COG0079	KO:K04720	Histidinol-phosphate/aromatic aminotransferase or cobyric acid decarboxylase
F. prausnitzii A2-165	FAEPRAA2165_RS12110	-4.0839	2.8252e-15	3.88837e-13	[H] Coenzyme transport and metabolism	COG2038	KO:K00768	NaMN:DMB phosphoribosyltransferase
F. prausnitzii A2-165	FAEPRAA2165_RS12090	-3.98759	1.01912e-17	1.66562e-15			KO:K02231
F. prausnitzii A2-165	FAEPRAA2165_RS12085	-3.89073	8.01863e-13	9.53124e-11	[G] Carbohydrate transport and metabolism	COG0406	KO:K02226	Broad specificity phosphatase PhoE
F. prausnitzii A2-165	FAEPRAA2165_RS12095	-3.68786	3.65426e-14	4.77794e-12	[H] Coenzyme transport and metabolism	COG0368	KO:K02233	Cobalamin synthase
F. prausnitzii A2-165	FAEPRAA2165_RS07805	-2.89567	0.00127563	0.0147293	[L] Replication, recombination and repair	COG0629	KO:K03111	Single-stranded DNA-binding protein
F. prausnitzii A2-165	FAEPRAA2165_RS07725	-2.82506	2.17001e-06	0.00012336			KO:K02005
F. prausnitzii A2-165	FAEPRAA2165_RS15485	-2.81547	1.39205e-05	0.000529807
F. prausnitzii A2-165	FAEPRAA2165_RS07735	-2.80384	2.46383e-06	0.000137083	[M] Cell wall/membrane/envelope biogenesis	COG4591	KO:K02004	ABC-type transport system, involved in lipoprotein release, permease component
F. prausnitzii A2-165	FAEPRAA2165_RS07740	-2.80348	1.64038e-06	9.9049e-05
F. prausnitzii A2-165	FAEPRAA2165_RS12605	-2.71491	1.23859e-06	7.89979e-05	[S] Function unknown	COG4720		Uncharacterized membrane protein
F. prausnitzii A2-165	FAEPRAA2165_RS12610	-2.58657	6.25379e-07	4.30359e-05	[H] Coenzyme transport and metabolism	COG0285	KO:K11754	Folylpolyglutamate synthase/Dihydropteroate synthase
F. prausnitzii A2-165	FAEPRAA2165_RS01465	-2.3526	6.36599e-09	5.94538e-07	[J] Translation, ribosomal structure and biogenesis	COG0480	KO:K02355	Translation elongation factor EF-G, a GTPase
F. prausnitzii A2-165	FAEPRAA2165_RS12720	-2.32735	1.26317e-05	0.000500103
F. prausnitzii A2-165	FAEPRAA2165_RS12725	-2.29281	0.000328712	0.0055817
F. prausnitzii A2-165	FAEPRAA2165_RS00185	-2.22782	1.32141e-06	8.22733e-05
F. prausnitzii A2-165	FAEPRAA2165_RS09490	-2.20635	1.28122e-08	1.11679e-06	[K] Transcription - [T] Signal transduction mechanisms	COG0745		DNA-binding response regulator, OmpR family, contains REC and winged-helix (wHTH) domain
F. prausnitzii A2-165	FAEPRAA2165_RS04695	-2.05116	0.00127861	0.0147293	[O] Posttranslational modification, protein turnover, chaperones	COG0465	KO:K03798	ATP-dependent Zn proteases
F. prausnitzii A2-165	FAEPRAA2165_RS13235	-2.03547	0.000201168	0.00383982	[K] Transcription - [T] Signal transduction mechanisms	COG0745		DNA-binding response regulator, OmpR family, contains REC and winged-helix (wHTH) domain
F. prausnitzii A2-165	FAEPRAA2165_RS15270	-2.01039	0.000102205	0.00236519
F. prausnitzii A2-165	FAEPRAA2165_RS06280	-1.98241	0.00605547	0.0432652	[S] Function unknown	COG4716	KO:K10254	Myosin-crossreactive antigen (function unknown)
F. prausnitzii A2-165	FAEPRAA2165_RS13230	-1.97867	0.000187745	0.00363669	[T] Signal transduction mechanisms	COG0642		Signal transduction histidine kinase
F. prausnitzii A2-165	FAEPRAA2165_RS03055	-1.9523	0.000232821	0.00434876	[M] Cell wall/membrane/envelope biogenesis	COG1210	KO:K00963	UTP-glucose-1-phosphate uridylyltransferase
F. prausnitzii A2-165	FAEPRAA2165_RS09500	-1.93944	1.81123e-05	0.000631517
F. prausnitzii A2-165	FAEPRAA2165_RS15210	-1.93086	1.99528e-06	0.000115948
F. prausnitzii A2-165	FAEPRAA2165_RS00035	-1.9005	0.000167067	0.00336662	[O] Posttranslational modification, protein turnover, chaperones	COG0265	KO:K04771	Periplasmic serine protease, S1-C subfamily, contain C-terminal PDZ domain
F. prausnitzii A2-165	FAEPRAA2165_RS07700	-1.8986	0.000240274	0.00445615	[C] Energy production and conversion	COG1454	KO:K00048	Alcohol dehydrogenase, class IV
F. prausnitzii A2-165	FAEPRAA2165_RS13450	-1.87499	0.00291589	0.0266423	[V] Defense mechanisms	COG1131	KO:K01990	ABC-type multidrug transport system, ATPase component
F. prausnitzii A2-165	FAEPRAA2165_RS10980	-1.87387	5.65499e-06	0.000259435
F. prausnitzii A2-165	FAEPRAA2165_RS08205	-1.86978	0.000242656	0.00446864
F. prausnitzii A2-165	FAEPRAA2165_RS13455	-1.85752	0.00550899	0.0410126
F. prausnitzii A2-165	FAEPRAA2165_RS00410	-1.81588	0.00442079	0.0347158
F. prausnitzii A2-165	FAEPRAA2165_RS09495	-1.77096	2.52996e-06	0.00013783
F. prausnitzii A2-165	FAEPRAA2165_RS00275	-1.7033	9.55026e-05	0.00229333	[K] Transcription	COG1595	KO:K03088	DNA-directed RNA polymerase specialized sigma subunit, sigma24 family
F. prausnitzii A2-165	FAEPRAA2165_RS10110	-1.68339	1.11246e-05	0.000454545
F. prausnitzii A2-165	FAEPRAA2165_RS01645	-1.68218	0.00100163	0.0128409
F. prausnitzii A2-165	FAEPRAA2165_RS04545	-1.67897	0.00030402	0.00523036	[E] Amino acid transport and metabolism - [R] General function prediction only	COG1168	KO:K14155	Bifunctional PLP-dependent enzyme with beta-cystathionase and maltose regulon repressor activities
F. prausnitzii A2-165	FAEPRAA2165_RS02090	-1.67033	0.00124278	0.0146391	[V] Defense mechanisms	COG2337	KO:K03497 - KO:K07171	mRNA-degrading endonuclease, toxin component of the MazEF toxin-antitoxin module
F. prausnitzii A2-165	FAEPRAA2165_RS12035	-1.6417	0.002715	0.0257237			KO:K07027
F. prausnitzii A2-165	FAEPRAA2165_RS04540	-1.63942	0.00350903	0.0302842	[E] Amino acid transport and metabolism	COG1113	KO:K03294	L-asparagine transporter and related permeases
F. prausnitzii A2-165	FAEPRAA2165_RS10675	-1.5965	0.000244666	0.00447413	[T] Signal transduction mechanisms	COG0642		Signal transduction histidine kinase
F. prausnitzii A2-165	FAEPRAA2165_RS10155	-1.59539	0.000979923	0.0127955	[K] Transcription - [G] Carbohydrate transport and metabolism	COG1940	KO:K00845	Sugar kinase of the NBD/HSP70 family, may contain an N-terminal HTH domain
F. prausnitzii A2-165	FAEPRAA2165_RS13745	-1.57379	0.000531443	0.00822321
F. prausnitzii A2-165	FAEPRAA2165_RS02775	-1.57135	6.19687e-08	4.91055e-06	[I] Lipid transport and metabolism	COG1307		Fatty acid-binding protein DegV (function unknown)
F. prausnitzii A2-165	FAEPRAA2165_RS10680	-1.56248	0.000142344	0.00302625
F. prausnitzii A2-165	FAEPRAA2165_RS04735	-1.53072	0.000146669	0.00309307	[G] Carbohydrate transport and metabolism	COG3250	KO:K01195	Beta-galactosidase/beta-glucuronidase
F. prausnitzii A2-165	FAEPRAA2165_RS04550	-1.51897	0.000616348	0.00910593	[O] Posttranslational modification, protein turnover, chaperones	COG1225		Peroxiredoxin
F. prausnitzii A2-165	FAEPRAA2165_RS04575	-1.51355	0.00467067	0.0358176			KO:K05366
F. prausnitzii A2-165	FAEPRAA2165_RS10150	-1.51068	0.00249223	0.0242275	[G] Carbohydrate transport and metabolism	COG3010	KO:K01788	Putative N-acetylmannosamine-6-phosphate epimerase
F. prausnitzii A2-165	FAEPRAA2165_RS01210	-1.50496	1.47304e-05	0.000529807
F. prausnitzii A2-165	FAEPRAA2165_RS14525	-1.50447	1.48316e-05	0.000529807			KO:K03545
F. prausnitzii A2-165	FAEPRAA2165_RS13840	-1.504	3.7578e-08	3.07083e-06	[T] Signal transduction mechanisms - [K] Transcription	COG0745		DNA-binding response regulator, OmpR family, contains REC and winged-helix (wHTH) domain
F. prausnitzii A2-165	FAEPRAA2165_RS02085	-1.48248	0.00260153	0.0251963	[L] Replication, recombination and repair	COG4974		Site-specific recombinase XerD
F. prausnitzii A2-165	FAEPRAA2165_RS06755	-1.47325	0.00269414	0.0256188	[V] Defense mechanisms	COG1131	KO:K01990	ABC-type multidrug transport system, ATPase component
F. prausnitzii A2-165	FAEPRAA2165_RS11400	-1.45886	3.88486e-06	0.000188128
F. prausnitzii A2-165	FAEPRAA2165_RS02595	-1.45849	0.000983518	0.0127955
F. prausnitzii A2-165	FAEPRAA2165_RS02590	-1.44914	0.00125535	0.0146551
F. prausnitzii A2-165	FAEPRAA2165_RS00505	-1.44482	4.02056e-05	0.0012063	[M] Cell wall/membrane/envelope biogenesis	COG0463		Glycosyltransferase involved in cell wall bisynthesis
F. prausnitzii A2-165	FAEPRAA2165_RS10960	-1.44086	0.00107786	0.0133879	[T] Signal transduction mechanisms - [K] Transcription	COG0745		DNA-binding response regulator, OmpR family, contains REC and winged-helix (wHTH) domain
F. prausnitzii A2-165	FAEPRAA2165_RS10480	-1.44016	1.28134e-05	0.000500103			KO:K07813
F. prausnitzii A2-165	FAEPRAA2165_RS01900	-1.4326	8.86232e-06	0.000386249
F. prausnitzii A2-165	FAEPRAA2165_RS04355	-1.42559	0.00564751	0.0413676	[I] Lipid transport and metabolism	COG1307		Fatty acid-binding protein DegV (function unknown)
F. prausnitzii A2-165	FAEPRAA2165_RS01905	-1.39693	1.44375e-05	0.000529807
F. prausnitzii A2-165	FAEPRAA2165_RS14615	-1.38684	8.52281e-05	0.002143	[O] Posttranslational modification, protein turnover, chaperones - [J] Translation, ribosomal structure and biogenesis	COG1670	KO:K03790	Protein N-acetyltransferase, RimJ/RimL family
F. prausnitzii A2-165	FAEPRAA2165_RS14610	-1.35873	0.000561786	0.00859106	[J] Translation, ribosomal structure and biogenesis	COG2262	KO:K03665	50S ribosomal subunit-associated GTPase HflX
F. prausnitzii A2-165	FAEPRAA2165_RS12930	-1.33923	1.90706e-05	0.000656178
F. prausnitzii A2-165	FAEPRAA2165_RS10160	-1.32551	0.00672896	0.0469233	[E] Amino acid transport and metabolism	COG2755		Lysophospholipase L1 or related esterase
F. prausnitzii A2-165	FAEPRAA2165_RS10135	-1.31167	0.00615233	0.0435998	[G] Carbohydrate transport and metabolism	COG0395	KO:K02026	ABC-type glycerol-3-phosphate transport system, permease component
F. prausnitzii A2-165	FAEPRAA2165_RS08220	-1.30777	0.00574173	0.0417817	[J] Translation, ribosomal structure and biogenesis	COG1188		Ribosomal 50S subunit-recycling heat shock protein, contains S4 domain
F. prausnitzii A2-165	FAEPRAA2165_RS08225	-1.30453	0.00139278	0.0158353
F. prausnitzii A2-165	FAEPRAA2165_RS13325	-1.27988	0.000762613	0.0106076	[S] Function unknown	COG4443		Uncharacterized protein
F. prausnitzii A2-165	FAEPRAA2165_RS08740	-1.27659	0.00012654	0.0027807	[H] Coenzyme transport and metabolism - [R] General function prediction only	COG0596		Pimeloyl-ACP methyl ester carboxylesterase
F. prausnitzii A2-165	FAEPRAA2165_RS14570	-1.2695	0.0042238	0.0338811
F. prausnitzii A2-165	FAEPRAA2165_RS08865	-1.26907	0.00699324	0.0483791
F. prausnitzii A2-165	FAEPRAA2165_RS04580	-1.26267	0.00359274	0.0306154	[V] Defense mechanisms	COG0534		Na+-driven multidrug efflux pump
F. prausnitzii A2-165	FAEPRAA2165_RS01910	-1.25812	0.00429641	0.0343581	[F] Nucleotide transport and metabolism	COG0461	KO:K00762	Orotate phosphoribosyltransferase
F. prausnitzii A2-165	FAEPRAA2165_RS08260	-1.24038	0.00552063	0.0410126	[K] Transcription	COG1609	KO:K02529	DNA-binding transcriptional regulator, LacI/PurR family
F. prausnitzii A2-165	FAEPRAA2165_RS15030	-1.22591	0.00222524	0.0223808
F. prausnitzii A2-165	FAEPRAA2165_RS04345	-1.22282	0.000880864	0.011935
F. prausnitzii A2-165	FAEPRAA2165_RS13845	-1.20978	0.000159824	0.00329086
F. prausnitzii A2-165	FAEPRAA2165_RS02400	-1.20303	0.00265516	0.0254998			KO:K19302
F. prausnitzii A2-165	FAEPRAA2165_RS04135	-1.20226	0.000732615	0.0104119	[G] Carbohydrate transport and metabolism	COG1216		Glycosyltransferase, GT2 family
F. prausnitzii A2-165	FAEPRAA2165_RS04655	-1.19277	0.0039988	0.032987
F. prausnitzii A2-165	FAEPRAA2165_RS10555	-1.18133	6.78752e-05	0.00177494
F. prausnitzii A2-165	FAEPRAA2165_RS03775	-1.17732	0.00100572	0.0128409			KO:K01992
F. prausnitzii A2-165	FAEPRAA2165_RS03620	-1.16636	0.00317266	0.0284733
F. prausnitzii A2-165	FAEPRAA2165_RS08215	-1.13774	0.0055785	0.0411339	[L] Replication, recombination and repair	COG0776	KO:K03530	Bacterial nucleoid DNA-binding protein
F. prausnitzii A2-165	FAEPRAA2165_RS03765	-1.12774	0.00188921	0.0203056
F. prausnitzii A2-165	FAEPRAA2165_RS14575	-1.12421	0.000746577	0.0104857	[G] Carbohydrate transport and metabolism	COG0205	KO:K00850	6-phosphofructokinase
F. prausnitzii A2-165	FAEPRAA2165_RS02585	-1.11037	0.00344842	0.0301285			KO:K01190
F. prausnitzii A2-165	FAEPRAA2165_RS03880	-1.10366	0.00558658	0.0411339	[O] Posttranslational modification, protein turnover, chaperones	COG0691	KO:K03664	tmRNA-binding protein
F. prausnitzii A2-165	FAEPRAA2165_RS03780	-1.10356	0.000193291	0.00371659
F. prausnitzii A2-165	FAEPRAA2165_RS13430	-1.09982	0.00194327	0.0206571			KO:K07646
F. prausnitzii A2-165	FAEPRAA2165_RS06250	-1.09455	0.001176	0.0141066	[R] General function prediction only	COG0714	KO:K03924	MoxR-like ATPase
F. prausnitzii A2-165	FAEPRAA2165_RS04650	-1.08215	0.00436018	0.0345511	[V] Defense mechanisms	COG3853		Uncharacterized conserved protein YaaN involved in tellurite resistance
F. prausnitzii A2-165	FAEPRAA2165_RS02575	-1.08022	0.0010095	0.0128409	[J] Translation, ribosomal structure and biogenesis	COG0742		16S rRNA G966 N2-methylase RsmD
F. prausnitzii A2-165	FAEPRAA2165_RS00450	-1.08008	0.000178351	0.00351573	[G] Carbohydrate transport and metabolism	COG1820	KO:K01443	N-acetylglucosamine-6-phosphate deacetylase
F. prausnitzii A2-165	FAEPRAA2165_RS03770	-1.07873	0.00074984	0.0104857	[V] Defense mechanisms	COG1131	KO:K01990	ABC-type multidrug transport system, ATPase component
F. prausnitzii A2-165	FAEPRAA2165_RS00455	-1.07851	0.000847087	0.0116586	[G] Carbohydrate transport and metabolism	COG0363	KO:K02564	6-phosphogluconolactonase/Glucosamine-6-phosphate isomerase/deaminase
F. prausnitzii A2-165	FAEPRAA2165_RS04645	-1.06688	0.00591688	0.0423908
F. prausnitzii A2-165	FAEPRAA2165_RS04340	-1.06369	0.00215741	0.0219519	[R] General function prediction only	COG2270	KO:K06902	MFS-type transporter involved in bile tolerance, Atg22 family
F. prausnitzii A2-165	FAEPRAA2165_RS12185	-1.06323	0.00266202	0.0254998	[R] General function prediction only	COG1040		Predicted amidophosphoribosyltransferases
F. prausnitzii A2-165	FAEPRAA2165_RS15685	-1.03598	0.000258134	0.00468764
F. prausnitzii A2-165	FAEPRAA2165_RS13330	-1.02128	0.00334146	0.029581
F. prausnitzii A2-165	FAEPRAA2165_RS00285	-1.01907	0.00414415	0.0333582
F. prausnitzii A2-165	FAEPRAA2165_RS11595	-1.01302	0.00317943	0.0284733
F. prausnitzii A2-165	FAEPRAA2165_RS03520	-1.00809	0.00248117	0.0242275
F. prausnitzii A2-165	FAEPRAA2165_RS13850	-0.99373	0.00193534	0.0206568	[M] Cell wall/membrane/envelope biogenesis	COG1136	KO:K02003	ABC-type lipoprotein export system, ATPase component
F. prausnitzii A2-165	FAEPRAA2165_RS15690	-0.988621	0.00106297	0.0133638
F. prausnitzii A2-165	FAEPRAA2165_RS13425	-0.978973	0.0030528	0.0275278	[T] Signal transduction mechanisms - [K] Transcription	COG0745	KO:K07667	DNA-binding response regulator, OmpR family, contains REC and winged-helix (wHTH) domain
F. prausnitzii A2-165	FAEPRAA2165_RS05080	-0.96698	0.00530029	0.0398283	[L] Replication, recombination and repair	COG0322	KO:K03703	Excinuclease UvrABC, nuclease subunit
F. prausnitzii A2-165	FAEPRAA2165_RS08325	-0.966601	0.00015331	0.00318178	[J] Translation, ribosomal structure and biogenesis	COG3041	KO:K19157	mRNA-degrading endonuclease (mRNA interferase) YafQ, toxin component of the YafQ-DinJ toxin-antitoxin module
F. prausnitzii A2-165	FAEPRAA2165_RS15680	-0.959711	0.00101626	0.0128409
F. prausnitzii A2-165	FAEPRAA2165_RS10740	-0.95162	0.00268797	0.0256188	[U] Intracellular trafficking, secretion, and vesicular transport	COG1826	KO:K03116	Sec-independent protein translocase protein TatA
F. prausnitzii A2-165	FAEPRAA2165_RS09530	-0.950572	0.000552657	0.00850116
F. prausnitzii A2-165	FAEPRAA2165_RS05950	-0.947206	0.000796417	0.0110192	[K] Transcription	COG2207		AraC-type DNA-binding domain and AraC-containing proteins
F. prausnitzii A2-165	FAEPRAA2165_RS03205	-0.940317	2.35737e-05	0.000785938	[H] Coenzyme transport and metabolism	COG0351	KO:K00941	Hydroxymethylpyrimidine/phosphomethylpyrimidine kinase
F. prausnitzii A2-165	FAEPRAA2165_RS11580	-0.934722	0.00279515	0.0260747
F. prausnitzii A2-165	FAEPRAA2165_RS00445	-0.919644	0.000663095	0.0096333
F. prausnitzii A2-165	FAEPRAA2165_RS03950	-0.919121	0.00118615	0.0141489	[F] Nucleotide transport and metabolism	COG0813	KO:K03784	Purine-nucleoside phosphorylase
F. prausnitzii A2-165	FAEPRAA2165_RS00100	-0.915254	0.00275497	0.0259145	[I] Lipid transport and metabolism	COG0204	KO:K00655	1-acyl-sn-glycerol-3-phosphate acyltransferase
F. prausnitzii A2-165	FAEPRAA2165_RS02365	-0.914079	0.000592452	0.00885293
F. prausnitzii A2-165	FAEPRAA2165_RS08320	-0.913499	0.000443912	0.00707823	[V] Defense mechanisms	COG3077	KO:K07473	Antitoxin component of the RelBE or YafQ-DinJ toxin-antitoxin module
F. prausnitzii A2-165	FAEPRAA2165_RS12935	-0.91252	0.000725582	0.0103683	[G] Carbohydrate transport and metabolism	COG3839	KO:K10112	ABC-type sugar transport system, ATPase component
F. prausnitzii A2-165	FAEPRAA2165_RS10735	-0.905568	1.33147e-08	1.12316e-06	[U] Intracellular trafficking, secretion, and vesicular transport	COG0805	KO:K03118	Sec-independent protein secretion pathway component TatC
F. prausnitzii A2-165	FAEPRAA2165_RS09150	-0.888909	0.0015024	0.0168617			KO:K08884
F. prausnitzii A2-165	FAEPRAA2165_RS12655	-0.887782	0.00108843	0.0133879
F. prausnitzii A2-165	FAEPRAA2165_RS07715	-0.8767	0.00505806	0.0381177	[K] Transcription - [T] Signal transduction mechanisms	COG0745		DNA-binding response regulator, OmpR family, contains REC and winged-helix (wHTH) domain
F. prausnitzii A2-165	FAEPRAA2165_RS15015	-0.873976	0.000863423	0.0118212	[U] Intracellular trafficking, secretion, and vesicular transport	COG1826	KO:K03117	Sec-independent protein translocase protein TatA
F. prausnitzii A2-165	FAEPRAA2165_RS01975	-0.870446	0.00478326	0.0362557
F. prausnitzii A2-165	FAEPRAA2165_RS13005	-0.868269	0.000645231	0.00947909	[G] Carbohydrate transport and metabolism	COG1653	KO:K02027	ABC-type glycerol-3-phosphate transport system, periplasmic component
F. prausnitzii A2-165	FAEPRAA2165_RS02395	-0.867842	0.00578393	0.0417817	[K] Transcription	COG1476		DNA-binding transcriptional regulator, XRE-family HTH domain
F. prausnitzii A2-165	FAEPRAA2165_RS12190	-0.858361	0.00448941	0.035012
F. prausnitzii A2-165	FAEPRAA2165_RS14540	-0.85392	0.00238877	0.0236615	[M] Cell wall/membrane/envelope biogenesis	COG2385	KO:K06381	Peptidoglycan hydrolase (amidase) enhancer domain
F. prausnitzii A2-165	FAEPRAA2165_RS13855	-0.853107	0.00119035	0.0141489			KO:K02004
F. prausnitzii A2-165	FAEPRAA2165_RS03875	-0.851376	0.000152114	0.00318178	[E] Amino acid transport and metabolism	COG1247	KO:K03823	L-amino acid N-acyltransferase YncA
F. prausnitzii A2-165	FAEPRAA2165_RS08140	-0.844439	0.00228176	0.022774	[O] Posttranslational modification, protein turnover, chaperones	COG0606	KO:K07391	Predicted ATPase with chaperone activity
F. prausnitzii A2-165	FAEPRAA2165_RS06260	-0.837563	0.00215075	0.0219519
F. prausnitzii A2-165	FAEPRAA2165_RS09540	-0.836944	0.00382308	0.0319405
F. prausnitzii A2-165	FAEPRAA2165_RS10565	-0.834413	0.00038558	0.00638159	[S] Function unknown	COG1649		Uncharacterized lipoprotein YddW, UPF0748 family
F. prausnitzii A2-165	FAEPRAA2165_RS07515	-0.823479	0.00138191	0.0157804	[E] Amino acid transport and metabolism	COG4166	KO:K15580	ABC-type oligopeptide transport system, periplasmic component
F. prausnitzii A2-165	FAEPRAA2165_RS13000	-0.823091	0.000463339	0.00729898
F. prausnitzii A2-165	FAEPRAA2165_RS10985	-0.819996	0.00475246	0.03619	[T] Signal transduction mechanisms	COG2199		GGDEF domain, diguanylate cyclase (c-di-GMP synthetase) or its enzymatically inactive variants
F. prausnitzii A2-165	FAEPRAA2165_RS00330	-0.818466	0.00360594	0.0306154
F. prausnitzii A2-165	FAEPRAA2165_RS00835	-0.816334	0.00156531	0.0173445
F. prausnitzii A2-165	FAEPRAA2165_RS02570	-0.81331	0.0028019	0.0260747
F. prausnitzii A2-165	FAEPRAA2165_RS14955	-0.812811	0.000574035	0.00867689
F. prausnitzii A2-165	FAEPRAA2165_RS06875	-0.811524	5.9229e-05	0.0016477			KO:K06889
F. prausnitzii A2-165	FAEPRAA2165_RS09085	-0.799497	0.00360471	0.0306154	[M] Cell wall/membrane/envelope biogenesis - [O] Posttranslational modification, protein turnover, chaperones	COG1086		NDP-sugar epimerase, includes UDP-GlcNAc-inverting 4,6-dehydratase FlaA1 and capsular polysaccharide biosynthesis protein EpsC
F. prausnitzii A2-165	FAEPRAA2165_RS01630	-0.787448	0.00272914	0.0257642
F. prausnitzii A2-165	FAEPRAA2165_RS03955	-0.775818	0.00175681	0.0191419	[M] Cell wall/membrane/envelope biogenesis	COG0739		Murein DD-endopeptidase MepM and murein hydrolase activator NlpD, contain LysM domain
F. prausnitzii A2-165	FAEPRAA2165_RS00910	-0.758987	0.00471141	0.0360243
F. prausnitzii A2-165	FAEPRAA2165_RS10860	-0.753499	0.00107358	0.0133879	[O] Posttranslational modification, protein turnover, chaperones	COG0652	KO:K03768	Peptidyl-prolyl cis-trans isomerase (rotamase) - cyclophilin family
F. prausnitzii A2-165	FAEPRAA2165_RS06805	-0.749888	0.00175147	0.0191419	[H] Coenzyme transport and metabolism	COG1488	KO:K00763	Nicotinic acid phosphoribosyltransferase
F. prausnitzii A2-165	FAEPRAA2165_RS00845	-0.739037	0.00109049	0.0133879
F. prausnitzii A2-165	FAEPRAA2165_RS00850	-0.713807	0.00209154	0.0217039			KO:K06919
F. prausnitzii A2-165	FAEPRAA2165_RS06880	-0.709425	5.06528e-05	0.00146034	[E] Amino acid transport and metabolism	COG1247		L-amino acid N-acyltransferase YncA
F. prausnitzii A2-165	FAEPRAA2165_RS14375	-0.703892	0.00198513	0.0209319	[G] Carbohydrate transport and metabolism	COG0524	KO:K00874	Sugar or nucleoside kinase, ribokinase family
F. prausnitzii A2-165	FAEPRAA2165_RS08080	-0.70267	0.00466686	0.0358176	[R] General function prediction only - [C] Energy production and conversion - [I] Lipid transport and metabolism	COG1304		FMN-dependent dehydrogenase, includes L-lactate dehydrogenase and type II isopentenyl diphosphate isomerase
F. prausnitzii A2-165	FAEPRAA2165_RS09535	-0.695174	0.00161755	0.0178476	[K] Transcription	COG1396		Transcriptional regulator, contains XRE-family HTH domain
F. prausnitzii A2-165	FAEPRAA2165_RS11440	-0.683214	0.00550068	0.0410126	[C] Energy production and conversion	COG1866	KO:K01610	Phosphoenolpyruvate carboxykinase, ATP-dependent
F. prausnitzii A2-165	FAEPRAA2165_RS10195	-0.678344	0.00647869	0.0456652
F. prausnitzii A2-165	FAEPRAA2165_RS07075	-0.67344	0.00225544	0.0225976			KO:K03070
F. prausnitzii A2-165	FAEPRAA2165_RS09245	-0.667098	0.00368089	0.0309502
F. prausnitzii A2-165	FAEPRAA2165_RS07080	-0.654972	0.00693314	0.0480906	[R] General function prediction only	COG4226		Predicted nuclease of the RNAse H fold, HicB family
F. prausnitzii A2-165	FAEPRAA2165_RS05310	-0.637203	0.00229693	0.0228383	[I] Lipid transport and metabolism	COG0584	KO:K01126	Glycerophosphoryl diester phosphodiesterase
F. prausnitzii A2-165	FAEPRAA2165_RS10685	-0.632323	4.05944e-05	0.0012063
F. prausnitzii A2-165	FAEPRAA2165_RS02390	-0.573595	0.00391037	0.0324623
F. prausnitzii A2-165	FAEPRAA2165_RS12020	-0.544443	0.00165965	0.0182353	[G] Carbohydrate transport and metabolism	COG3594		Fucose 4-O-acetylase or related acetyltransferase
F. prausnitzii A2-165	FAEPRAA2165_RS10900	-0.524883	0.00587915	0.0422362	[K] Transcription	COG0583		DNA-binding transcriptional regulator, LysR family
F. prausnitzii A2-165	FAEPRAA2165_RS05725	-0.494144	0.00407735	0.0331537	[D] Cell cycle control, cell division, chromosome partitioning	COG2884	KO:K09812	ABC-type ATPase involved in cell division
F. prausnitzii A2-165	FAEPRAA2165_RS05480	-0.446524	0.00354626	0.0305049
F. prausnitzii A2-165	FAEPRAA2165_RS13735	0.456737	0.00630158	0.0445369
F. prausnitzii A2-165	FAEPRAA2165_RS10000	0.502877	0.00145367	0.0163852	[L] Replication, recombination and repair	COG0323	KO:K03572	DNA mismatch repair ATPase MutL
F. prausnitzii A2-165	FAEPRAA2165_RS11905	0.505831	0.00200242	0.0210295
F. prausnitzii A2-165	FAEPRAA2165_RS00070	0.50721	0.00476075	0.03619	[E] Amino acid transport and metabolism	COG0757	KO:K03786	3-dehydroquinate dehydratase
F. prausnitzii A2-165	FAEPRAA2165_RS15010	0.520204	0.00360502	0.0306154
F. prausnitzii A2-165	FAEPRAA2165_RS00065	0.538898	2.37435e-05	0.000785938	[E] Amino acid transport and metabolism	COG2876	KO:K03856	3-deoxy-D-arabino-heptulosonate 7-phosphate (DAHP) synthase
F. prausnitzii A2-165	FAEPRAA2165_RS09890	0.541851	6.43192e-05	0.00171627	[R] General function prediction only	COG1768	KO:K07099	Predicted phosphohydrolase
F. prausnitzii A2-165	FAEPRAA2165_RS00075	0.55272	0.000321018	0.00548668	[E] Amino acid transport and metabolism	COG0169	KO:K00014	Shikimate 5-dehydrogenase
F. prausnitzii A2-165	FAEPRAA2165_RS10400	0.567911	0.00583645	0.042045	[S] Function unknown	COG4990		Uncharacterized protein YvpB
F. prausnitzii A2-165	FAEPRAA2165_RS03245	0.568814	0.00408241	0.0331537	[J] Translation, ribosomal structure and biogenesis	COG0050	KO:K02358	Translation elongation factor EF-Tu, a GTPase
F. prausnitzii A2-165	FAEPRAA2165_RS10795	0.569183	0.00210879	0.0217964	[S] Function unknown	COG3641	KO:K07035	Uncharacterized membrane protein (does not regulate perfringolysin O expression)
F. prausnitzii A2-165	FAEPRAA2165_RS05180	0.577377	0.00410392	0.0332252	[L] Replication, recombination and repair	COG0305	KO:K02314	Replicative DNA helicase
F. prausnitzii A2-165	FAEPRAA2165_RS00060	0.595782	0.00449867	0.035012	[E] Amino acid transport and metabolism	COG0128	KO:K00800	5-enolpyruvylshikimate-3-phosphate synthase
F. prausnitzii A2-165	FAEPRAA2165_RS00810	0.619218	6.94488e-05	0.00179811
F. prausnitzii A2-165	FAEPRAA2165_RS09995	0.629108	0.000304021	0.00523036	[J] Translation, ribosomal structure and biogenesis	COG0324	KO:K00791	tRNA A37 N6-isopentenylltransferase MiaA
F. prausnitzii A2-165	FAEPRAA2165_RS04885	0.634789	0.00685875	0.0477012	[K] Transcription - [T] Signal transduction mechanisms	COG4753	KO:K07720	Two-component response regulator, YesN/AraC family, consists of REC and AraC-type DNA-binding domains
F. prausnitzii A2-165	FAEPRAA2165_RS00815	0.657387	0.00652757	0.045886	[L] Replication, recombination and repair - [K] Transcription	COG1061	KO:K01156	Superfamily II DNA or RNA helicase
F. prausnitzii A2-165	FAEPRAA2165_RS08110	0.664127	0.00292403	0.0266423	[F] Nucleotide transport and metabolism	COG0503	KO:K00759	Adenine/guanine phosphoribosyltransferase or related PRPP-binding protein
F. prausnitzii A2-165	FAEPRAA2165_RS07615	0.679487	0.00339205	0.029866	[J] Translation, ribosomal structure and biogenesis	COG0779	KO:K09748	Ribosome maturation factor RimP
F. prausnitzii A2-165	FAEPRAA2165_RS00055	0.680006	0.000270443	0.0048439	[E] Amino acid transport and metabolism	COG0287	KO:K04517	Prephenate dehydrogenase
F. prausnitzii A2-165	FAEPRAA2165_RS08180	0.687397	0.00331181	0.0294571	[K] Transcription - [T] Signal transduction mechanisms	COG0317	KO:K00951	(p)ppGpp synthase/hydrolase, HD superfamily
F. prausnitzii A2-165	FAEPRAA2165_RS02210	0.699328	0.00116329	0.0140834
F. prausnitzii A2-165	FAEPRAA2165_RS08185	0.702789	0.00460173	0.0355377	[J] Translation, ribosomal structure and biogenesis	COG1490	KO:K07560	D-Tyr-tRNAtyr deacylase
F. prausnitzii A2-165	FAEPRAA2165_RS02030	0.703573	0.00113154	0.0137627			KO:K02968
F. prausnitzii A2-165	FAEPRAA2165_RS02205	0.704682	0.000139001	0.00300402	[O] Posttranslational modification, protein turnover, chaperones	COG4930	KO:K01338	Predicted ATP-dependent Lon-type protease
F. prausnitzii A2-165	FAEPRAA2165_RS09860	0.712255	5.16616e-06	0.000241241	[K] Transcription	COG1327	KO:K07738	Transcriptional regulator NrdR, contains Zn-ribbon and ATP-cone domains
F. prausnitzii A2-165	FAEPRAA2165_RS09865	0.720028	2.98364e-05	0.000940026	[U] Intracellular trafficking, secretion, and vesicular transport	COG0342	KO:K12257	Preprotein translocase subunit SecD
F. prausnitzii A2-165	FAEPRAA2165_RS00545	0.7264	0.0029945	0.0270955	[C] Energy production and conversion	COG1757		Na+/H+ antiporter NhaC
F. prausnitzii A2-165	FAEPRAA2165_RS08195	0.730427	0.00189468	0.0203056	[H] Coenzyme transport and metabolism	COG0635	KO:K02495	Coproporphyrinogen III oxidase or related Fe-S oxidoreductase
F. prausnitzii A2-165	FAEPRAA2165_RS07655	0.739986	0.00404628	0.0330657	[H] Coenzyme transport and metabolism	COG0196	KO:K11753	FAD synthase
F. prausnitzii A2-165	FAEPRAA2165_RS07640	0.75187	0.001003	0.0128409	[J] Translation, ribosomal structure and biogenesis	COG0858	KO:K02834	Ribosome-binding factor A
F. prausnitzii A2-165	FAEPRAA2165_RS07625	0.766554	0.00124846	0.01464	[R] General function prediction only	COG2740	KO:K07742	Predicted RNA-binding protein YlxR, DUF448 family
F. prausnitzii A2-165	FAEPRAA2165_RS00715	0.774803	0.00444576	0.0348074	[E] Amino acid transport and metabolism	COG0002	KO:K00145	N-acetyl-gamma-glutamylphosphate reductase
F. prausnitzii A2-165	FAEPRAA2165_RS10340	0.775698	0.00366694	0.0309324	[J] Translation, ribosomal structure and biogenesis	COG2384	KO:K06967	tRNA A22 N-methylase
F. prausnitzii A2-165	FAEPRAA2165_RS07475	0.77794	0.0043579	0.0345511	[C] Energy production and conversion	COG0055	KO:K02112	FoF1-type ATP synthase, beta subunit
F. prausnitzii A2-165	FAEPRAA2165_RS07645	0.783916	0.00195663	0.0207149	[F] Nucleotide transport and metabolism	COG0618	KO:K06881	nanoRNase/pAp phosphatase, hydrolyzes c-di-AMP and oligoRNAs
F. prausnitzii A2-165	FAEPRAA2165_RS01035	0.801812	9.82228e-05	0.00229333	[J] Translation, ribosomal structure and biogenesis	COG2501	KO:K14761	Ribosome-associated protein YbcJ, S4-like RNA binding protein
F. prausnitzii A2-165	FAEPRAA2165_RS14060	0.807414	0.0038012	0.0318594	[E] Amino acid transport and metabolism	COG1126	KO:K02028	ABC-type polar amino acid transport system, ATPase component
F. prausnitzii A2-165	FAEPRAA2165_RS00050	0.809495	2.49593e-05	0.000805786	[K] Transcription	COG2378		Predicted DNA-binding transcriptional regulator YafY, contains an HTH and WYL domains
F. prausnitzii A2-165	FAEPRAA2165_RS08230	0.812245	0.000298043	0.00523036	[F] Nucleotide transport and metabolism	COG0504	KO:K01937	CTP synthase (UTP-ammonia lyase)
F. prausnitzii A2-165	FAEPRAA2165_RS09920	0.813801	0.0011149	0.0136236	[J] Translation, ribosomal structure and biogenesis	COG0335	KO:K02884	Ribosomal protein L19
F. prausnitzii A2-165	FAEPRAA2165_RS09915	0.819478	0.000428222	0.00698973	[U] Intracellular trafficking, secretion, and vesicular transport	COG0681	KO:K03100	Signal peptidase I
F. prausnitzii A2-165	FAEPRAA2165_RS05325	0.836969	5.08187e-05	0.00146034	[S] Function unknown	COG4720	KO:K16924	Uncharacterized membrane protein
F. prausnitzii A2-165	FAEPRAA2165_RS08190	0.848757	0.000301711	0.00523036	[R] General function prediction only	COG0491		Glyoxylase or a related metal-dependent hydrolase, beta-lactamase superfamily II
F. prausnitzii A2-165	FAEPRAA2165_RS09910	0.849197	0.000496105	0.00772211	[J] Translation, ribosomal structure and biogenesis	COG1161	KO:K14540	Ribosome biogenesis GTPase A
F. prausnitzii A2-165	FAEPRAA2165_RS04435	0.849632	0.00284196	0.0263081	[E] Amino acid transport and metabolism	COG0559	KO:K01997	Branched-chain amino acid ABC-type transport system, permease component
F. prausnitzii A2-165	FAEPRAA2165_RS01030	0.85066	0.000463	0.00729898	[L] Replication, recombination and repair	COG1195	KO:K03629	Recombinational DNA repair ATPase RecF
F. prausnitzii A2-165	FAEPRAA2165_RS04880	0.85274	0.0015298	0.0170505
F. prausnitzii A2-165	FAEPRAA2165_RS07650	0.856872	0.000964067	0.0127924	[J] Translation, ribosomal structure and biogenesis	COG0130	KO:K03177	tRNA U55 pseudouridine synthase TruB, may also work on U342 of tmRNA
F. prausnitzii A2-165	FAEPRAA2165_RS06585	0.864616	0.00438231	0.0345698	[C] Energy production and conversion	COG2025	KO:K03522	Electron transfer flavoprotein, alpha subunit
F. prausnitzii A2-165	FAEPRAA2165_RS07635	0.868675	0.000436064	0.00699575	[J] Translation, ribosomal structure and biogenesis	COG0532	KO:K02519	Translation initiation factor IF-2, a GTPase
F. prausnitzii A2-165	FAEPRAA2165_RS00490	0.870229	0.00334836	0.029581	[K] Transcription	COG1959		DNA-binding transcriptional regulator, IscR family
F. prausnitzii A2-165	FAEPRAA2165_RS00710	0.873405	0.00347845	0.0301285	[E] Amino acid transport and metabolism	COG1364	KO:K00620	N-acetylglutamate synthase (N-acetylornithine aminotransferase)
F. prausnitzii A2-165	FAEPRAA2165_RS00130	0.874559	0.000662108	0.0096333	[R] General function prediction only	COG2509	KO:K07137	Uncharacterized FAD-dependent dehydrogenase
F. prausnitzii A2-165	FAEPRAA2165_RS10345	0.876663	2.60167e-05	0.000829678
F. prausnitzii A2-165	FAEPRAA2165_RS07620	0.88331	0.00127808	0.0147293	[K] Transcription	COG0195	KO:K02600	Transcription antitermination factor NusA, contains S1 and KH domains
F. prausnitzii A2-165	FAEPRAA2165_RS00120	0.896375	0.000331648	0.00559521	[V] Defense mechanisms	COG0534		Na+-driven multidrug efflux pump
F. prausnitzii A2-165	FAEPRAA2165_RS09905	0.910875	5.58117e-05	0.00158639	[L] Replication, recombination and repair	COG0164	KO:K03470	Ribonuclease HII
F. prausnitzii A2-165	FAEPRAA2165_RS04430	0.912248	0.00276489	0.0259146	[E] Amino acid transport and metabolism	COG4177	KO:K01998	ABC-type branched-chain amino acid transport system, permease component
F. prausnitzii A2-165	FAEPRAA2165_RS04440	0.915264	0.00342018	0.0300127	[E] Amino acid transport and metabolism	COG0683	KO:K01999	ABC-type branched-chain amino acid transport system, periplasmic component
F. prausnitzii A2-165	FAEPRAA2165_RS07630	0.919495	0.000260907	0.00470532
F. prausnitzii A2-165	FAEPRAA2165_RS11765	0.923006	0.00297946	0.027053
F. prausnitzii A2-165	FAEPRAA2165_RS01025	0.928201	0.000178811	0.00351573
F. prausnitzii A2-165	FAEPRAA2165_RS01670	0.931894	0.00460698	0.0355377
F. prausnitzii A2-165	FAEPRAA2165_RS00705	0.942071	0.00266212	0.0254998	[E] Amino acid transport and metabolism	COG0548	KO:K00930	Acetylglutamate kinase
F. prausnitzii A2-165	FAEPRAA2165_RS07470	0.944819	0.00569213	0.041578	[C] Energy production and conversion	COG0355	KO:K02114	FoF1-type ATP synthase, epsilon subunit
F. prausnitzii A2-165	FAEPRAA2165_RS01240	0.948565	0.00285717	0.0263081	[V] Defense mechanisms	COG0534		Na+-driven multidrug efflux pump
F. prausnitzii A2-165	FAEPRAA2165_RS00125	0.955668	0.000116464	0.00262546	[S] Function unknown	COG3247		Uncharacterized membrane protein HdeD, DUF308 family
F. prausnitzii A2-165	FAEPRAA2165_RS04595	0.957155	0.00488685	0.0369338	[R] General function prediction only	COG0523		GTPase, G3E family
F. prausnitzii A2-165	FAEPRAA2165_RS13700	0.95982	0.00556103	0.0411339
F. prausnitzii A2-165	FAEPRAA2165_RS08370	0.966916	0.00667495	0.0467962	[S] Function unknown	COG5294		Uncharacterized protein YxeA
F. prausnitzii A2-165	FAEPRAA2165_RS12985	0.968674	0.004592	0.0355377	[P] Inorganic ion transport and metabolism - [H] Coenzyme transport and metabolism	COG1120	KO:K02013	ABC-type cobalamin/Fe3+-siderophores transport system, ATPase component
F. prausnitzii A2-165	FAEPRAA2165_RS10775	0.973672	0.00135675	0.0155609
F. prausnitzii A2-165	FAEPRAA2165_RS06750	0.983957	0.00365751	0.0309324	[J] Translation, ribosomal structure and biogenesis	COG0254	KO:K02909	Ribosomal protein L31
F. prausnitzii A2-165	FAEPRAA2165_RS04425	1.0149	0.000165138	0.00336662	[E] Amino acid transport and metabolism	COG0411	KO:K01995	ABC-type branched-chain amino acid transport system, ATPase component
F. prausnitzii A2-165	FAEPRAA2165_RS12215	1.01565	0.000578783	0.00869838	[S] Function unknown	COG3543	KO:K09706	Uncharacterized protein
F. prausnitzii A2-165	FAEPRAA2165_RS05315	1.02452	7.18757e-05	0.00184269	[H] Coenzyme transport and metabolism	COG0619	KO:K16785	Energy-coupling factor transporter transmembrane protein EcfT
F. prausnitzii A2-165	FAEPRAA2165_RS01020	1.02543	0.000749521	0.0104857	[L] Replication, recombination and repair	COG0187	KO:K02470	DNA gyrase/topoisomerase IV, subunit B
F. prausnitzii A2-165	FAEPRAA2165_RS10300	1.02885	0.00247218	0.0242275
F. prausnitzii A2-165	FAEPRAA2165_RS13205	1.03023	0.00577039	0.0417817	[J] Translation, ribosomal structure and biogenesis	COG0291	KO:K02916	Ribosomal protein L35
F. prausnitzii A2-165	FAEPRAA2165_RS04420	1.05044	0.000369593	0.00619542	[E] Amino acid transport and metabolism	COG0410	KO:K01996	ABC-type branched-chain amino acid transport system, ATPase component
F. prausnitzii A2-165	FAEPRAA2165_RS12880	1.05422	0.000965784	0.0127924	[S] Function unknown	COG3610		Uncharacterized membrane protein YjjB, DUF3815 family
F. prausnitzii A2-165	FAEPRAA2165_RS01015	1.09126	0.000714168	0.0102613	[L] Replication, recombination and repair	COG0188	KO:K02469	DNA gyrase/topoisomerase IV, subunit A
F. prausnitzii A2-165	FAEPRAA2165_RS06350	1.09563	0.00438898	0.0345698	[J] Translation, ribosomal structure and biogenesis	COG0227	KO:K02902	Ribosomal protein L28
F. prausnitzii A2-165	FAEPRAA2165_RS02455	1.10768	0.00550743	0.0410126	[J] Translation, ribosomal structure and biogenesis	COG0102	KO:K02871	Ribosomal protein L13
F. prausnitzii A2-165	FAEPRAA2165_RS13775	1.13883	0.00213434	0.0219519
F. prausnitzii A2-165	FAEPRAA2165_RS04585	1.1524	0.000181305	0.00353816	[M] Cell wall/membrane/envelope biogenesis	COG1346		Putative effector of murein hydrolase
F. prausnitzii A2-165	FAEPRAA2165_RS11895	1.15858	0.00285217	0.0263081	[H] Coenzyme transport and metabolism	COG0327		Putative GTP cyclohydrolase 1 type 2, NIF3 family
F. prausnitzii A2-165	FAEPRAA2165_RS10850	1.16175	0.00248416	0.0242275	[E] Amino acid transport and metabolism - [K] Transcription	COG1167	KO:K00375	DNA-binding transcriptional regulator, MocR family, contains an aminotransferase domain
F. prausnitzii A2-165	FAEPRAA2165_RS05320	1.17846	7.9193e-07	5.30999e-05	[O] Posttranslational modification, protein turnover, chaperones	COG1123	KO:K16787	ABC-type glutathione transport system ATPase component, contains duplicated ATPase domain
F. prausnitzii A2-165	FAEPRAA2165_RS11890	1.17973	0.00404288	0.0330657	[J] Translation, ribosomal structure and biogenesis	COG1293		Predicted component of the ribosome quality control (RQC) complex, YloA/Tae2 family, contains fibronectin-binding (FbpA) and DUF814 domains
F. prausnitzii A2-165	FAEPRAA2165_RS03895	1.19846	0.00347947	0.0301285	[J] Translation, ribosomal structure and biogenesis	COG0016	KO:K01889	Phenylalanyl-tRNA synthetase alpha subunit
F. prausnitzii A2-165	FAEPRAA2165_RS13200	1.20248	0.000964565	0.0127924	[J] Translation, ribosomal structure and biogenesis	COG0292	KO:K02887	Ribosomal protein L20
F. prausnitzii A2-165	FAEPRAA2165_RS11205	1.20676	0.00120397	0.014246			KO:K01154
F. prausnitzii A2-165	FAEPRAA2165_RS05670	1.24239	0.00670341	0.0468701	[F] Nucleotide transport and metabolism	COG0041	KO:K01588	Phosphoribosylcarboxyaminoimidazole (NCAIR) mutase
F. prausnitzii A2-165	FAEPRAA2165_RS10545	1.24419	9.04455e-06	0.000387729
F. prausnitzii A2-165	FAEPRAA2165_RS01660	1.26041	9.81242e-05	0.00229333
F. prausnitzii A2-165	FAEPRAA2165_RS02450	1.26336	0.00222304	0.0223808	[J] Translation, ribosomal structure and biogenesis	COG0103	KO:K02996	Ribosomal protein S9
F. prausnitzii A2-165	FAEPRAA2165_RS01355	1.26687	0.000969773	0.0127924	[E] Amino acid transport and metabolism	COG1045	KO:K00640	Serine acetyltransferase
F. prausnitzii A2-165	FAEPRAA2165_RS02610	1.28291	0.0024829	0.0242275	[J] Translation, ribosomal structure and biogenesis	COG0215	KO:K01883	Cysteinyl-tRNA synthetase
F. prausnitzii A2-165	FAEPRAA2165_RS11810	1.3205	0.00038373	0.00638159	[J] Translation, ribosomal structure and biogenesis	COG0096	KO:K02994	Ribosomal protein S8
F. prausnitzii A2-165	FAEPRAA2165_RS01915	1.32229	3.75104e-05	0.001154	[V] Defense mechanisms	COG0534		Na+-driven multidrug efflux pump
F. prausnitzii A2-165	FAEPRAA2165_RS14470	1.32916	0.0020837	0.0217039	[K] Transcription	COG1959		DNA-binding transcriptional regulator, IscR family
F. prausnitzii A2-165	FAEPRAA2165_RS14970	1.33835	0.000923757	0.0124517	[L] Replication, recombination and repair	COG3598		RecA-family ATPase
F. prausnitzii A2-165	FAEPRAA2165_RS01275	1.35317	0.00141176	0.0159816	[V] Defense mechanisms	COG0534		Na+-driven multidrug efflux pump
F. prausnitzii A2-165	FAEPRAA2165_RS11795	1.38903	0.000140919	0.00302052	[J] Translation, ribosomal structure and biogenesis	COG0098	KO:K02988	Ribosomal protein S5
F. prausnitzii A2-165	FAEPRAA2165_RS11800	1.39442	0.000178701	0.00351573	[J] Translation, ribosomal structure and biogenesis	COG0256	KO:K02881	Ribosomal protein L18
F. prausnitzii A2-165	FAEPRAA2165_RS03890	1.39522	2.44144e-05	0.000798045	[J] Translation, ribosomal structure and biogenesis	COG0072	KO:K01890	Phenylalanyl-tRNA synthetase beta subunit
F. prausnitzii A2-165	FAEPRAA2165_RS11785	1.40586	9.48036e-05	0.00229333	[J] Translation, ribosomal structure and biogenesis	COG0200	KO:K02876	Ribosomal protein L15
F. prausnitzii A2-165	FAEPRAA2165_RS11885	1.41978	0.00101647	0.0128409	[J] Translation, ribosomal structure and biogenesis	COG0051	KO:K02946	Ribosomal protein S10
F. prausnitzii A2-165	FAEPRAA2165_RS05120	1.43168	0.00705578	0.048683	[H] Coenzyme transport and metabolism	COG1893	KO:K00077	Ketopantoate reductase
F. prausnitzii A2-165	FAEPRAA2165_RS11780	1.44549	0.000167365	0.00336662	[U] Intracellular trafficking, secretion, and vesicular transport	COG0201	KO:K03076	Preprotein translocase subunit SecY
F. prausnitzii A2-165	FAEPRAA2165_RS07215	1.45016	0.00432079	0.0344477			KO:K15533
F. prausnitzii A2-165	FAEPRAA2165_RS11805	1.45027	0.000121567	0.00269404	[J] Translation, ribosomal structure and biogenesis	COG0097	KO:K02933	Ribosomal protein L6P/L9E
F. prausnitzii A2-165	FAEPRAA2165_RS01115	1.45209	0.000478828	0.00749782
F. prausnitzii A2-165	FAEPRAA2165_RS10415	1.45685	0.000291478	0.0051501	[E] Amino acid transport and metabolism	COG1104	KO:K04487	Cysteine sulfinate desulfinase/cysteine desulfurase or related enzyme
F. prausnitzii A2-165	FAEPRAA2165_RS11790	1.48284	6.33201e-05	0.00170703	[J] Translation, ribosomal structure and biogenesis	COG1841	KO:K02907	Ribosomal protein L30/L7E
F. prausnitzii A2-165	FAEPRAA2165_RS12870	1.48451	0.00215277	0.0219519			KO:K01421
F. prausnitzii A2-165	FAEPRAA2165_RS06505	1.48898	0.00178712	0.0193914
F. prausnitzii A2-165	FAEPRAA2165_RS10460	1.49014	0.00222366	0.0223808	[I] Lipid transport and metabolism	COG4667		Predicted phospholipase, patatin/cPLA2 family
F. prausnitzii A2-165	FAEPRAA2165_RS05775	1.50294	1.72827e-12	1.96497e-10	[E] Amino acid transport and metabolism	COG4166	KO:K15580	ABC-type oligopeptide transport system, periplasmic component
F. prausnitzii A2-165	FAEPRAA2165_RS03885	1.51635	1.05105e-06	6.87126e-05	[L] Replication, recombination and repair	COG0350	KO:K00567	O6-methylguanine-DNA--protein-cysteine methyltransferase
F. prausnitzii A2-165	FAEPRAA2165_RS12865	1.52683	0.000872367	0.0118815	[R] General function prediction only	COG1033	KO:K07003	Predicted exporter protein, RND superfamily
F. prausnitzii A2-165	FAEPRAA2165_RS11835	1.54837	9.71442e-05	0.00229333	[J] Translation, ribosomal structure and biogenesis	COG0186	KO:K02961	Ribosomal protein S17
F. prausnitzii A2-165	FAEPRAA2165_RS14430	1.56304	0.00330763	0.0294571	[K] Transcription	COG1695	KO:K10947	DNA-binding transcriptional regulator, PadR family
F. prausnitzii A2-165	FAEPRAA2165_RS11825	1.59622	6.1398e-05	0.00167246	[J] Translation, ribosomal structure and biogenesis	COG0198	KO:K02895	Ribosomal protein L24
F. prausnitzii A2-165	FAEPRAA2165_RS11830	1.62406	4.92828e-05	0.00144803	[J] Translation, ribosomal structure and biogenesis	COG0093	KO:K02874	Ribosomal protein L14
F. prausnitzii A2-165	FAEPRAA2165_RS02825	1.63015	0.00396822	0.0328383
F. prausnitzii A2-165	FAEPRAA2165_RS05075	1.6625	0.000136059	0.00296496	[E] Amino acid transport and metabolism - [T] Signal transduction mechanisms	COG0834	KO:K02424	ABC-type amino acid transport/signal transduction system, periplasmic component/domain
F. prausnitzii A2-165	FAEPRAA2165_RS05070	1.6668	0.000291149	0.0051501	[E] Amino acid transport and metabolism	COG1126	KO:K10010 - KO:K16960	ABC-type polar amino acid transport system, ATPase component
F. prausnitzii A2-165	FAEPRAA2165_RS11850	1.66796	6.62677e-05	0.0017504	[J] Translation, ribosomal structure and biogenesis	COG0092	KO:K02982	Ribosomal protein S3
F. prausnitzii A2-165	FAEPRAA2165_RS11820	1.67163	3.96939e-05	0.0012063	[J] Translation, ribosomal structure and biogenesis	COG0094	KO:K02931	Ribosomal protein L5
F. prausnitzii A2-165	FAEPRAA2165_RS11550	1.68816	0.00576318	0.0417817
F. prausnitzii A2-165	FAEPRAA2165_RS11855	1.69207	6.00119e-05	0.00165191	[J] Translation, ribosomal structure and biogenesis	COG0091	KO:K02890	Ribosomal protein L22
F. prausnitzii A2-165	FAEPRAA2165_RS11865	1.71327	8.21212e-05	0.00208492	[J] Translation, ribosomal structure and biogenesis	COG0090	KO:K02886	Ribosomal protein L2
F. prausnitzii A2-165	FAEPRAA2165_RS01655	1.71373	0.00611021	0.0435092
F. prausnitzii A2-165	FAEPRAA2165_RS11870	1.72936	5.8694e-05	0.0016477	[J] Translation, ribosomal structure and biogenesis	COG0089	KO:K02892	Ribosomal protein L23
F. prausnitzii A2-165	FAEPRAA2165_RS11815	1.7312	3.35695e-05	0.00104505	[J] Translation, ribosomal structure and biogenesis	COG0199	KO:K02954	Ribosomal protein S14
F. prausnitzii A2-165	FAEPRAA2165_RS11880	1.76866	0.000103271	0.00236888	[J] Translation, ribosomal structure and biogenesis	COG0087	KO:K02906	Ribosomal protein L3
F. prausnitzii A2-165	FAEPRAA2165_RS06840	1.76908	0.00559987	0.0411339	[C] Energy production and conversion	COG0716		Flavodoxin
F. prausnitzii A2-165	FAEPRAA2165_RS07200	1.77972	0.00346415	0.0301285	[G] Carbohydrate transport and metabolism	COG1175	KO:K10201	ABC-type sugar transport system, permease component
F. prausnitzii A2-165	FAEPRAA2165_RS11875	1.79763	8.81975e-05	0.00219654	[J] Translation, ribosomal structure and biogenesis	COG0088	KO:K02926	Ribosomal protein L4
F. prausnitzii A2-165	FAEPRAA2165_RS11845	1.8076	2.23408e-05	0.000758717	[J] Translation, ribosomal structure and biogenesis	COG0197	KO:K02878	Ribosomal protein L16/L10AE
F. prausnitzii A2-165	FAEPRAA2165_RS06845	1.81303	3.87513e-06	0.000188128
F. prausnitzii A2-165	FAEPRAA2165_RS05810	1.81951	0.000605077	0.0089902	[C] Energy production and conversion	COG1883	KO:K01572	Na+-transporting methylmalonyl-CoA/oxaloacetate decarboxylase, beta subunit
F. prausnitzii A2-165	FAEPRAA2165_RS15835	1.85679	2.37653e-07	1.82783e-05
F. prausnitzii A2-165	FAEPRAA2165_RS06595	1.88894	0.00108203	0.0133879	[F] Nucleotide transport and metabolism	COG2233	KO:K03458	Xanthine/uracil permease
F. prausnitzii A2-165	FAEPRAA2165_RS11860	1.92984	5.86159e-06	0.000264277	[J] Translation, ribosomal structure and biogenesis	COG0185	KO:K02965	Ribosomal protein S19
F. prausnitzii A2-165	FAEPRAA2165_RS11840	1.98024	2.6319e-06	0.000140457	[J] Translation, ribosomal structure and biogenesis	COG0255	KO:K02904	Ribosomal protein L29
F. prausnitzii A2-165	FAEPRAA2165_RS11555	1.99923	0.00414585	0.0333582
F. prausnitzii A2-165	FAEPRAA2165_RS13515	2.00599	0.00201973	0.0211264	[V] Defense mechanisms	COG1132	KO:K06147	ABC-type multidrug transport system, ATPase and permease component
F. prausnitzii A2-165	FAEPRAA2165_RS12395	2.03993	0.00404009	0.0330657	[U] Intracellular trafficking, secretion, and vesicular transport	COG3451		Type IV secretory pathway, VirB4 component
F. prausnitzii A2-165	FAEPRAA2165_RS11775	2.03999	3.33389e-06	0.000167656	[F] Nucleotide transport and metabolism	COG0563	KO:K00939	Adenylate kinase or related kinase
F. prausnitzii A2-165	FAEPRAA2165_RS10410	2.04304	2.84476e-06	0.000148781	[O] Posttranslational modification, protein turnover, chaperones	COG0822	KO:K04488	NifU homolog involved in Fe-S cluster formation
F. prausnitzii A2-165	FAEPRAA2165_RS05560	2.08997	0.00188927	0.0203056
F. prausnitzii A2-165	FAEPRAA2165_RS11460	2.1203	9.75117e-05	0.00229333
F. prausnitzii A2-165	FAEPRAA2165_RS11770	2.1212	1.6666e-06	9.9049e-05	[J] Translation, ribosomal structure and biogenesis	COG0024	KO:K01265	Methionine aminopeptidase
F. prausnitzii A2-165	FAEPRAA2165_RS14420	2.13562	0.000566945	0.00861953
F. prausnitzii A2-165	FAEPRAA2165_RS13510	2.15872	0.000434126	0.00699575	[V] Defense mechanisms	COG1132	KO:K06147	ABC-type multidrug transport system, ATPase and permease component
F. prausnitzii A2-165	FAEPRAA2165_RS07090	2.20511	1.49926e-05	0.000529807
F. prausnitzii A2-165	FAEPRAA2165_RS09265	2.36566	0.000430343	0.00698973
F. prausnitzii A2-165	FAEPRAA2165_RS11465	2.43448	0.000110342	0.00250907	[E] Amino acid transport and metabolism	COG1687		Branched-chain amino acid transport protein AzlD
F. prausnitzii A2-165	FAEPRAA2165_RS09280	2.45546	0.0061229	0.0435092	[H] Coenzyme transport and metabolism	COG1893	KO:K00077	Ketopantoate reductase
F. prausnitzii A2-165	FAEPRAA2165_RS06855	2.51565	1.47753e-05	0.000529807	[R] General function prediction only	COG1873		Sporulation protein YlmC, PRC-barrel domain family
F. prausnitzii A2-165	FAEPRAA2165_RS12770	2.51883	1.40617e-05	0.000529807	[F] Nucleotide transport and metabolism	COG2252	KO:K06901	Xanthine/uracil/vitamin C permease, AzgA family
F. prausnitzii A2-165	FAEPRAA2165_RS09310	2.61898	0.000695435	0.0100473
F. prausnitzii A2-165	FAEPRAA2165_RS09120	2.64612	0.000219136	0.00415248	[E] Amino acid transport and metabolism - [R] General function prediction only	COG0493	KO:K00266	NADPH-dependent glutamate synthase beta chain or related oxidoreductase
F. prausnitzii A2-165	FAEPRAA2165_RS05815	2.66714	0.00287996	0.0264249
F. prausnitzii A2-165	FAEPRAA2165_RS09835	2.69174	0.00387151	0.032242
F. prausnitzii A2-165	FAEPRAA2165_RS09275	2.73336	0.00040368	0.00663914
F. prausnitzii A2-165	FAEPRAA2165_RS04390	2.83796	1.24982e-05	0.000500103	[P] Inorganic ion transport and metabolism	COG1918	KO:K04758	Fe2+ transport system protein FeoA
F. prausnitzii A2-165	FAEPRAA2165_RS09320	2.8653	1.01733e-05	0.000429085
F. prausnitzii A2-165	FAEPRAA2165_RS13490	3.08531	7.73881e-06	0.000343	[E] Amino acid transport and metabolism	COG0747	KO:K15584	ABC-type transport system, periplasmic component
F. prausnitzii A2-165	FAEPRAA2165_RS04450	3.09609	1.04046e-05	0.000431875	[G] Carbohydrate transport and metabolism	COG0148	KO:K01689	Enolase
F. prausnitzii A2-165	FAEPRAA2165_RS09295	3.30919	9.45135e-05	0.00229333
F. prausnitzii A2-165	FAEPRAA2165_RS09325	3.35311	0.000120992	0.00269404	[R] General function prediction only	COG3976		Uncharacterized protein, contains FMN-binding domain
F. prausnitzii A2-165	FAEPRAA2165_RS09270	3.50105	0.000973491	0.0127924
F. prausnitzii A2-165	FAEPRAA2165_RS04385	3.54885	6.23633e-07	4.30359e-05	[P] Inorganic ion transport and metabolism	COG1918	KO:K04758	Fe2+ transport system protein FeoA
F. prausnitzii A2-165	FAEPRAA2165_RS09305	3.5845	0.000230748	0.00434105	[R] General function prediction only	COG0491		Glyoxylase or a related metal-dependent hydrolase, beta-lactamase superfamily II
F. prausnitzii A2-165	FAEPRAA2165_RS13480	3.67663	0.00117556	0.0141066	[P] Inorganic ion transport and metabolism - [E] Amino acid transport and metabolism	COG1173	KO:K15586	ABC-type dipeptide/oligopeptide/nickel transport system, permease component
F. prausnitzii A2-165	FAEPRAA2165_RS06105	3.79191	4.314e-06	0.000205111	[P] Inorganic ion transport and metabolism	COG4779	KO:K02015	ABC-type enterobactin transport system, permease component
F. prausnitzii A2-165	FAEPRAA2165_RS06110	3.80758	2.71572e-07	2.02903e-05	[H] Coenzyme transport and metabolism - [P] Inorganic ion transport and metabolism	COG1120	KO:K02013	ABC-type cobalamin/Fe3+-siderophores transport system, ATPase component
F. prausnitzii A2-165	FAEPRAA2165_RS06100	3.81765	3.30875e-06	0.000167656	[P] Inorganic ion transport and metabolism	COG0609	KO:K02015	ABC-type Fe3+-siderophore transport system, permease component
F. prausnitzii A2-165	FAEPRAA2165_RS04360	4.26376	8.75432e-11	9.15702e-09	[V] Defense mechanisms	COG1132	KO:K06148	ABC-type multidrug transport system, ATPase and permease component
F. prausnitzii A2-165	FAEPRAA2165_RS06095	4.68918	7.96436e-09	7.18165e-07	[P] Inorganic ion transport and metabolism	COG0614	KO:K02016	ABC-type Fe3+-hydroxamate transport system, periplasmic component
F. prausnitzii A2-165	FAEPRAA2165_RS04380	4.72875	4.75728e-10	4.78472e-08	[P] Inorganic ion transport and metabolism	COG0370	KO:K04759	Fe2+ transport system protein B
F. prausnitzii A2-165	FAEPRAA2165_RS04365	4.86791	1.35352e-13	1.68546e-11	[C] Energy production and conversion - [O] Posttranslational modification, protein turnover, chaperones	COG4988		ABC-type transport system involved in cytochrome bd biosynthesis, ATPase and permease components
F. prausnitzii A2-165	FAEPRAA2165_RS04375	5.49956	4.51332e-11	4.91764e-09
F. prausnitzii A2-165	FAEPRAA2165_RS04370	5.64908	1.36709e-21	3.24995e-19	[K] Transcription	COG1321		Mn-dependent transcriptional regulator, DtxR family
R. intestinalis L1-82	ROSINTL182_RS19035	-3.80243	2.74557e-12	5.08943e-10			KO:K07813
R. intestinalis L1-82	ROSINTL182_RS19015	-2.85335	2.10389e-07	1.17326e-05
R. intestinalis L1-82	ROSINTL182_RS18415	-2.74846	2.52772e-11	4.23935e-09
R. intestinalis L1-82	ROSINTL182_RS19025	-2.6927	2.79827e-06	8.60002e-05
R. intestinalis L1-82	ROSINTL182_RS19005	-2.64357	4.78613e-05	0.000868904
R. intestinalis L1-82	ROSINTL182_RS19600	-2.6273	3.08916e-08	2.59048e-06
R. intestinalis L1-82	ROSINTL182_RS17790	-2.6271	5.54709e-06	0.000151448	[G] Carbohydrate transport and metabolism	COG3839	KO:K10112	ABC-type sugar transport system, ATPase component
R. intestinalis L1-82	ROSINTL182_RS19020	-2.60858	0.000255198	0.0028808
R. intestinalis L1-82	ROSINTL182_RS01310	-2.59176	0.000936257	0.00768647	[G] Carbohydrate transport and metabolism - [T] Signal transduction mechanisms	COG1925	KO:K11189	Phosphotransferase system, HPr and related phosphotransfer proteins
R. intestinalis L1-82	ROSINTL182_RS19030	-2.57802	9.42409e-08	6.0239e-06
R. intestinalis L1-82	ROSINTL182_RS01045	-2.52487	2.94945e-08	2.53365e-06
R. intestinalis L1-82	ROSINTL182_RS06745	-2.49193	0.000819732	0.00696767	[M] Cell wall/membrane/envelope biogenesis	COG0463		Glycosyltransferase involved in cell wall bisynthesis
R. intestinalis L1-82	ROSINTL182_RS01315	-2.46273	9.90884e-06	0.000244049	[G] Carbohydrate transport and metabolism	COG1299	KO:K02770	Phosphotransferase system, fructose-specific IIC component
R. intestinalis L1-82	ROSINTL182_RS17265	-2.46016	2.13199e-07	1.17326e-05
R. intestinalis L1-82	ROSINTL182_RS02255	-2.39951	2.24477e-06	7.32044e-05
R. intestinalis L1-82	ROSINTL182_RS09240	-2.37797	0.0111461	0.0437642	[E] Amino acid transport and metabolism	COG2873	KO:K01740	O-acetylhomoserine/O-acetylserine sulfhydrylase, pyridoxal phosphate-dependent
R. intestinalis L1-82	ROSINTL182_RS08410	-2.35235	2.65001e-07	1.37255e-05	[K] Transcription	COG1278	KO:K03704	Cold shock protein, CspA family
R. intestinalis L1-82	ROSINTL182_RS18430	-2.32653	0.00143236	0.0106429
R. intestinalis L1-82	ROSINTL182_RS06795	-2.29372	0.000814204	0.0069434
R. intestinalis L1-82	ROSINTL182_RS18380	-2.28853	9.00093e-07	3.72956e-05
R. intestinalis L1-82	ROSINTL182_RS18420	-2.27041	0.000106354	0.00152268
R. intestinalis L1-82	ROSINTL182_RS19165	-2.24514	0.000156364	0.00200259	[J] Translation, ribosomal structure and biogenesis	COG0480	KO:K02355	Translation elongation factor EF-G, a GTPase
R. intestinalis L1-82	ROSINTL182_RS19010	-2.2263	0.000147946	0.00191455
R. intestinalis L1-82	ROSINTL182_RS19000	-2.21652	2.20333e-06	7.25245e-05
R. intestinalis L1-82	ROSINTL182_RS06805	-2.2135	0.00505306	0.0254969	[M] Cell wall/membrane/envelope biogenesis - [G] Carbohydrate transport and metabolism	COG1682	KO:K09692	ABC-type polysaccharide/polyol phosphate export permease
R. intestinalis L1-82	ROSINTL182_RS18705	-2.20096	0.000334431	0.00348481
R. intestinalis L1-82	ROSINTL182_RS06780	-2.18499	0.00011574	0.00162406
R. intestinalis L1-82	ROSINTL182_RS04445	-2.13546	0.00651937	0.0300147	[M] Cell wall/membrane/envelope biogenesis - [D] Cell cycle control, cell division, chromosome partitioning	COG0768	KO:K08384	Cell division protein FtsI/penicillin-binding protein 2
R. intestinalis L1-82	ROSINTL182_RS17260	-2.13036	0.00357195	0.0196262	[K] Transcription	COG1846		DNA-binding transcriptional regulator, MarR family
R. intestinalis L1-82	ROSINTL182_RS13965	-2.08207	2.58535e-06	8.27781e-05	[K] Transcription	COG1609	KO:K02529	DNA-binding transcriptional regulator, LacI/PurR family
R. intestinalis L1-82	ROSINTL182_RS03340	-2.07962	7.99428e-08	5.25078e-06	[M] Cell wall/membrane/envelope biogenesis	COG1089	KO:K01711	GDP-D-mannose dehydratase
R. intestinalis L1-82	ROSINTL182_RS00315	-2.06544	9.57803e-08	6.0239e-06	[M] Cell wall/membrane/envelope biogenesis	COG0791		Cell wall-associated hydrolase, NlpC family
R. intestinalis L1-82	ROSINTL182_RS01305	-2.05996	0.000386394	0.00385519	[G] Carbohydrate transport and metabolism	COG1080	KO:K08483	Phosphoenolpyruvate-protein kinase (PTS system EI component in bacteria)
R. intestinalis L1-82	ROSINTL182_RS12810	-2.03593	0.000246746	0.00283999	[G] Carbohydrate transport and metabolism	COG1263	KO:K02804	Phosphotransferase system IIC components, glucose/maltose/N-acetylglucosamine-specific
R. intestinalis L1-82	ROSINTL182_RS05135	-2.03335	8.17503e-16	2.6175e-13	[G] Carbohydrate transport and metabolism	COG0448	KO:K00975	ADP-glucose pyrophosphorylase
R. intestinalis L1-82	ROSINTL182_RS18240	-2.02858	0.000975893	0.00795624	[F] Nucleotide transport and metabolism	COG1781	KO:K00610	Aspartate carbamoyltransferase, regulatory subunit
R. intestinalis L1-82	ROSINTL182_RS00790	-2.01628	0.0127702	0.048676	[O] Posttranslational modification, protein turnover, chaperones	COG1310		Proteasome lid subunit RPN8/RPN11, contains Jab1/MPN domain metalloenzyme (JAMM) motif
R. intestinalis L1-82	ROSINTL182_RS18390	-2.01603	0.00243771	0.0149575
R. intestinalis L1-82	ROSINTL182_RS03330	-2.01516	8.97462e-05	0.00135659	[M] Cell wall/membrane/envelope biogenesis	COG0836	KO:K00971	Mannose-1-phosphate guanylyltransferase
R. intestinalis L1-82	ROSINTL182_RS02260	-2.00279	4.49799e-06	0.000127757	[G] Carbohydrate transport and metabolism	COG4211	KO:K10541	ABC-type glucose/galactose transport system, permease component
R. intestinalis L1-82	ROSINTL182_RS18410	-2.00066	3.64483e-05	0.000717157
R. intestinalis L1-82	ROSINTL182_RS04450	-1.96837	0.000514823	0.00482236	[M] Cell wall/membrane/envelope biogenesis - [D] Cell cycle control, cell division, chromosome partitioning	COG0768	KO:K08384	Cell division protein FtsI/penicillin-binding protein 2
R. intestinalis L1-82	ROSINTL182_RS12815	-1.96709	0.000540341	0.00502132	[G] Carbohydrate transport and metabolism	COG2190	KO:K02757	Phosphotransferase system IIA component
R. intestinalis L1-82	ROSINTL182_RS16380	-1.96166	5.78003e-08	4.2411e-06	[J] Translation, ribosomal structure and biogenesis	COG0495	KO:K01869	Leucyl-tRNA synthetase
R. intestinalis L1-82	ROSINTL182_RS17270	-1.95784	0.00797423	0.0346731
R. intestinalis L1-82	ROSINTL182_RS12820	-1.93106	0.00632857	0.0294196			KO:K03488
R. intestinalis L1-82	ROSINTL182_RS17290	-1.92177	1.24593e-05	0.000290607	[G] Carbohydrate transport and metabolism	COG1640	KO:K00705	4-alpha-glucanotransferase
R. intestinalis L1-82	ROSINTL182_RS00775	-1.91735	0.00132224	0.0100149	[I] Lipid transport and metabolism - [Q] Secondary metabolites biosynthesis, transport and catabolism	COG0236	KO:K02078	Acyl carrier protein
R. intestinalis L1-82	ROSINTL182_RS11165	-1.91523	8.98365e-06	0.000225146	[S] Function unknown	COG4708		Uncharacterized membrane protein
R. intestinalis L1-82	ROSINTL182_RS16625	-1.90667	0.00575642	0.0276969
R. intestinalis L1-82	ROSINTL182_RS03335	-1.90604	1.98687e-06	6.79393e-05	[M] Cell wall/membrane/envelope biogenesis	COG0451	KO:K02377	Nucleoside-diphosphate-sugar epimerase
R. intestinalis L1-82	ROSINTL182_RS17300	-1.89941	6.97882e-07	3.19213e-05	[G] Carbohydrate transport and metabolism	COG1175	KO:K15771	ABC-type sugar transport system, permease component
R. intestinalis L1-82	ROSINTL182_RS07480	-1.89574	0.000192925	0.00236166	[K] Transcription	COG1609	KO:K02529	DNA-binding transcriptional regulator, LacI/PurR family
R. intestinalis L1-82	ROSINTL182_RS14505	-1.88828	7.38332e-06	0.000191206
R. intestinalis L1-82	ROSINTL182_RS03980	-1.88088	1.9222e-06	6.63724e-05	[J] Translation, ribosomal structure and biogenesis	COG0227	KO:K02902	Ribosomal protein L28
R. intestinalis L1-82	ROSINTL182_RS07505	-1.87999	0.000995535	0.00802351
R. intestinalis L1-82	ROSINTL182_RS02250	-1.87407	0.000321123	0.00339756	[T] Signal transduction mechanisms - [K] Transcription	COG4753	KO:K07720	Two-component response regulator, YesN/AraC family, consists of REC and AraC-type DNA-binding domains
R. intestinalis L1-82	ROSINTL182_RS06785	-1.84652	0.00469301	0.0240785
R. intestinalis L1-82	ROSINTL182_RS02245	-1.83024	0.00217122	0.0138785	[T] Signal transduction mechanisms	COG2972	KO:K07718	Sensor histidine kinase YesM
R. intestinalis L1-82	ROSINTL182_RS17305	-1.80454	0.00398095	0.0213408	[G] Carbohydrate transport and metabolism	COG3833	KO:K15772	ABC-type maltose transport system, permease component
R. intestinalis L1-82	ROSINTL182_RS06810	-1.80029	0.00168852	0.0117529
R. intestinalis L1-82	ROSINTL182_RS06760	-1.799	0.00479341	0.0243965
R. intestinalis L1-82	ROSINTL182_RS14185	-1.79757	0.00685667	0.0310412	[G] Carbohydrate transport and metabolism	COG1175	KO:K15771	ABC-type sugar transport system, permease component
R. intestinalis L1-82	ROSINTL182_RS05130	-1.79109	3.20529e-09	3.42092e-07	[G] Carbohydrate transport and metabolism	COG0448	KO:K00975	ADP-glucose pyrophosphorylase
R. intestinalis L1-82	ROSINTL182_RS08900	-1.7854	8.03889e-05	0.00126397	[K] Transcription	COG1954	KO:K02443	Glycerol-3-phosphate responsive antiterminator (mRNA-binding)
R. intestinalis L1-82	ROSINTL182_RS05140	-1.77455	2.05125e-06	6.94663e-05	[D] Cell cycle control, cell division, chromosome partitioning	COG2088	KO:K06412	DNA-binding protein SpoVG, cell septation regulator
R. intestinalis L1-82	ROSINTL182_RS13650	-1.77392	1.86599e-05	0.00041075	[U] Intracellular trafficking, secretion, and vesicular transport	COG1314	KO:K03075	Preprotein translocase subunit SecG
R. intestinalis L1-82	ROSINTL182_RS10565	-1.76987	0.00142054	0.0105999	[N] Cell motility	COG1684	KO:K02421	Flagellar biosynthesis protein FliR
R. intestinalis L1-82	ROSINTL182_RS05660	-1.75826	0.01288	0.0488303	[I] Lipid transport and metabolism	COG1307		Fatty acid-binding protein DegV (function unknown)
R. intestinalis L1-82	ROSINTL182_RS05105	-1.75166	5.36099e-07	2.48439e-05	[E] Amino acid transport and metabolism - [F] Nucleotide transport and metabolism	COG0462	KO:K00948	Phosphoribosylpyrophosphate synthetase
R. intestinalis L1-82	ROSINTL182_RS13120	-1.74301	0.00178129	0.0122166	[J] Translation, ribosomal structure and biogenesis	COG0016	KO:K01889	Phenylalanyl-tRNA synthetase alpha subunit
R. intestinalis L1-82	ROSINTL182_RS13955	-1.70069	0.00154175	0.011196
R. intestinalis L1-82	ROSINTL182_RS21315	-1.68554	0.00161359	0.0114118
R. intestinalis L1-82	ROSINTL182_RS06800	-1.67362	0.00319299	0.0180321	[M] Cell wall/membrane/envelope biogenesis - [G] Carbohydrate transport and metabolism	COG1134	KO:K09693	ABC-type polysaccharide/polyol phosphate transport system, ATPase component
R. intestinalis L1-82	ROSINTL182_RS17000	-1.6504	0.0015045	0.0110163
R. intestinalis L1-82	ROSINTL182_RS02270	-1.64304	2.10433e-06	6.99194e-05	[G] Carbohydrate transport and metabolism	COG1879	KO:K10540	ABC-type sugar transport system, periplasmic component, contains N-terminal xre family HTH domain
R. intestinalis L1-82	ROSINTL182_RS12940	-1.63508	1.29272e-05	0.000299536
R. intestinalis L1-82	ROSINTL182_RS06750	-1.62337	0.00236968	0.0146497	[R] General function prediction only - [E] Amino acid transport and metabolism	COG1063		Threonine dehydrogenase or related Zn-dependent dehydrogenase
R. intestinalis L1-82	ROSINTL182_RS14515	-1.62288	0.00121454	0.00944285
R. intestinalis L1-82	ROSINTL182_RS01240	-1.61815	7.02148e-05	0.00116102	[J] Translation, ribosomal structure and biogenesis	COG0441	KO:K01868	Threonyl-tRNA synthetase
R. intestinalis L1-82	ROSINTL182_RS04460	-1.59385	0.0123725	0.0475885	[J] Translation, ribosomal structure and biogenesis	COG0275	KO:K03438	16S rRNA C1402 N4-methylase RsmH
R. intestinalis L1-82	ROSINTL182_RS10220	-1.58905	2.80807e-06	8.60002e-05	[H] Coenzyme transport and metabolism	COG4822		Cobalamin biosynthesis protein CbiK, Co2+ chelatase
R. intestinalis L1-82	ROSINTL182_RS00070	-1.58141	3.47099e-05	0.000686789
R. intestinalis L1-82	ROSINTL182_RS06860	-1.57938	0.000112973	0.00159796	[M] Cell wall/membrane/envelope biogenesis	COG3307		O-antigen ligase
R. intestinalis L1-82	ROSINTL182_RS13210	-1.56415	4.90582e-08	3.83962e-06
R. intestinalis L1-82	ROSINTL182_RS18395	-1.56278	0.000452191	0.00438737
R. intestinalis L1-82	ROSINTL182_RS12000	-1.56144	0.00207219	0.0135605
R. intestinalis L1-82	ROSINTL182_RS15115	-1.55411	0.000748326	0.00645981	[S] Function unknown	COG4509	KO:K08600	Uncharacterized protein
R. intestinalis L1-82	ROSINTL182_RS18405	-1.54113	1.2001e-07	7.28749e-06
R. intestinalis L1-82	ROSINTL182_RS12330	-1.52452	0.00158464	0.0113668	[J] Translation, ribosomal structure and biogenesis	COG0522	KO:K02986	Ribosomal protein S4 or related protein
R. intestinalis L1-82	ROSINTL182_RS18385	-1.51783	0.0059629	0.0283037
R. intestinalis L1-82	ROSINTL182_RS14190	-1.50804	0.00287492	0.0168056	[G] Carbohydrate transport and metabolism	COG2182	KO:K15770	Maltose-binding periplasmic protein MalE
R. intestinalis L1-82	ROSINTL182_RS15930	-1.50695	4.00408e-05	0.000766433	[J] Translation, ribosomal structure and biogenesis	COG0231	KO:K02356	Translation elongation factor P (EF-P)/translation initiation factor 5A (eIF-5A)
R. intestinalis L1-82	ROSINTL182_RS00010	-1.50236	0.00414925	0.0220537
R. intestinalis L1-82	ROSINTL182_RS11520	-1.48676	1.17036e-08	1.08474e-06	[D] Cell cycle control, cell division, chromosome partitioning	COG0850	KO:K03610	Septum formation inhibitor MinC
R. intestinalis L1-82	ROSINTL182_RS15605	-1.48318	1.18036e-05	0.000277149	[S] Function unknown	COG4913		Uncharacterized protein YPO0396
R. intestinalis L1-82	ROSINTL182_RS01800	-1.47594	0.0107985	0.0430231	[T] Signal transduction mechanisms	COG2200		EAL domain, c-di-GMP-specific phosphodiesterase class I (or its enzymatically inactive variant)
R. intestinalis L1-82	ROSINTL182_RS06765	-1.45383	0.000245482	0.00283471	[H] Coenzyme transport and metabolism - [E] Amino acid transport and metabolism	COG0028	KO:K01652	Acetolactate synthase large subunit or other thiamine pyrophosphate-requiring enzyme
R. intestinalis L1-82	ROSINTL182_RS15110	-1.44582	0.00157547	0.0113241	[K] Transcription	COG2378		Predicted DNA-binding transcriptional regulator YafY, contains an HTH and WYL domains
R. intestinalis L1-82	ROSINTL182_RS06770	-1.4176	0.00989305	0.0406099	[M] Cell wall/membrane/envelope biogenesis	COG0399	KO:K12452	dTDP-4-amino-4,6-dideoxygalactose transaminase
R. intestinalis L1-82	ROSINTL182_RS03320	-1.41327	5.32867e-07	2.48439e-05
R. intestinalis L1-82	ROSINTL182_RS18750	-1.38356	0.00538949	0.0263934
R. intestinalis L1-82	ROSINTL182_RS05630	-1.38091	0.00906177	0.03804	[K] Transcription	COG4189		Predicted transcriptional regulator
R. intestinalis L1-82	ROSINTL182_RS02265	-1.36408	0.007011	0.0315764	[G] Carbohydrate transport and metabolism	COG1129	KO:K10542	ABC-type sugar transport system, ATPase component
R. intestinalis L1-82	ROSINTL182_RS16660	-1.36383	0.000823665	0.00697343	[R] General function prediction only	COG1434		Uncharacterized SAM-binding protein YcdF, DUF218 family
R. intestinalis L1-82	ROSINTL182_RS06875	-1.35609	0.00773675	0.0338958
R. intestinalis L1-82	ROSINTL182_RS03185	-1.3555	0.00322602	0.0181792	[I] Lipid transport and metabolism	COG1024	KO:K01715	Enoyl-CoA hydratase/carnithine racemase
R. intestinalis L1-82	ROSINTL182_RS15445	-1.35483	6.82022e-08	4.70996e-06	[C] Energy production and conversion	COG0282	KO:K00925	Acetate kinase
R. intestinalis L1-82	ROSINTL182_RS08735	-1.35273	0.00507587	0.0255754	[J] Translation, ribosomal structure and biogenesis	COG0143	KO:K01874	Methionyl-tRNA synthetase
R. intestinalis L1-82	ROSINTL182_RS16235	-1.33984	0.00717451	0.0321075	[P] Inorganic ion transport and metabolism	COG1055		Na+/H+ antiporter NhaD or related arsenite permease
R. intestinalis L1-82	ROSINTL182_RS10480	-1.33015	5.44791e-05	0.000941072	[J] Translation, ribosomal structure and biogenesis	COG0264	KO:K02357	Translation elongation factor EF-Ts
R. intestinalis L1-82	ROSINTL182_RS16325	-1.32515	0.000137573	0.00183535	[O] Posttranslational modification, protein turnover, chaperones	COG0822		NifU homolog involved in Fe-S cluster formation
R. intestinalis L1-82	ROSINTL182_RS20520	-1.31012	0.000484591	0.00460035
R. intestinalis L1-82	ROSINTL182_RS02170	-1.30876	0.005244	0.0261236
R. intestinalis L1-82	ROSINTL182_RS14500	-1.28624	0.00311678	0.0178284			KO:K07258
R. intestinalis L1-82	ROSINTL182_RS04465	-1.28327	0.00750947	0.0332266	[J] Translation, ribosomal structure and biogenesis	COG2001	KO:K03925	MraZ, DNA-binding transcriptional regulator and inhibitor of RsmH methyltransferase activity
R. intestinalis L1-82	ROSINTL182_RS14520	-1.28007	0.00235223	0.0146112	[R] General function prediction only	COG0325	KO:K06997	Uncharacterized pyridoxal phosphate-containing protein, affects Ilv metabolism, UPF0001 family
R. intestinalis L1-82	ROSINTL182_RS00610	-1.2778	4.27508e-06	0.000124085	[C] Energy production and conversion	COG0712	KO:K02113	FoF1-type ATP synthase, delta subunit
R. intestinalis L1-82	ROSINTL182_RS09995	-1.23414	0.0115434	0.0451731
R. intestinalis L1-82	ROSINTL182_RS03440	-1.22999	0.00252678	0.0153535
R. intestinalis L1-82	ROSINTL182_RS13275	-1.2208	0.000191971	0.00236166	[R] General function prediction only	COG2081	KO:K07007	Predicted flavoprotein YhiN
R. intestinalis L1-82	ROSINTL182_RS11080	-1.22037	0.00317436	0.0180135	[L] Replication, recombination and repair	COG1961		Site-specific DNA recombinase related to the DNA invertase Pin
R. intestinalis L1-82	ROSINTL182_RS00605	-1.21946	4.54668e-05	0.000829711	[C] Energy production and conversion	COG0711	KO:K02109	FoF1-type ATP synthase, membrane subunit b or b'
R. intestinalis L1-82	ROSINTL182_RS07445	-1.2083	0.00213625	0.0137297	[T] Signal transduction mechanisms	COG2199		GGDEF domain, diguanylate cyclase (c-di-GMP synthetase) or its enzymatically inactive variants
R. intestinalis L1-82	ROSINTL182_RS01190	-1.20648	0.00625352	0.0293274
R. intestinalis L1-82	ROSINTL182_RS02410	-1.2017	0.00289092	0.0168429	[J] Translation, ribosomal structure and biogenesis	COG0172	KO:K01875	Seryl-tRNA synthetase
R. intestinalis L1-82	ROSINTL182_RS03665	-1.19852	0.00160627	0.0114118			KO:K00931
R. intestinalis L1-82	ROSINTL182_RS15355	-1.1951	0.00128842	0.0098434	[J] Translation, ribosomal structure and biogenesis	COG0335	KO:K02884	Ribosomal protein L19
R. intestinalis L1-82	ROSINTL182_RS21285	-1.19322	0.000675172	0.00598981
R. intestinalis L1-82	ROSINTL182_RS06865	-1.18904	0.000329395	0.00346307
R. intestinalis L1-82	ROSINTL182_RS16330	-1.18385	8.44732e-06	0.00021559
R. intestinalis L1-82	ROSINTL182_RS21660	-1.18377	0.0036777	0.0201444	[M] Cell wall/membrane/envelope biogenesis	COG0438		Glycosyltransferase involved in cell wall bisynthesis
R. intestinalis L1-82	ROSINTL182_RS05740	-1.17993	0.0032436	0.0182491	[G] Carbohydrate transport and metabolism	COG1653	KO:K17234	ABC-type glycerol-3-phosphate transport system, periplasmic component
R. intestinalis L1-82	ROSINTL182_RS12770	-1.17819	8.42632e-05	0.00129596	[X] Mobilome: prophages, transposons	COG3344		Retron-type reverse transcriptase
R. intestinalis L1-82	ROSINTL182_RS12835	-1.17636	0.000219907	0.00260479	[C] Energy production and conversion	COG0674	KO:K03737	Pyruvate:ferredoxin oxidoreductase or related 2-oxoacid:ferredoxin oxidoreductase, alpha subunit
R. intestinalis L1-82	ROSINTL182_RS00595	-1.1592	0.000298815	0.00326841	[C] Energy production and conversion	COG0356	KO:K02108	FoF1-type ATP synthase, membrane subunit a
R. intestinalis L1-82	ROSINTL182_RS17435	-1.14864	0.00024362	0.00282247	[J] Translation, ribosomal structure and biogenesis	COG2265	KO:K03215	tRNA/tmRNA/rRNA uracil-C5-methylase, TrmA/RlmC/RlmD family
R. intestinalis L1-82	ROSINTL182_RS00615	-1.13848	9.11935e-07	3.73469e-05	[C] Energy production and conversion	COG0056	KO:K02111	FoF1-type ATP synthase, alpha subunit
R. intestinalis L1-82	ROSINTL182_RS10485	-1.13291	0.000723841	0.00629474	[J] Translation, ribosomal structure and biogenesis	COG0052	KO:K02967	Ribosomal protein S2
R. intestinalis L1-82	ROSINTL182_RS14535	-1.13015	0.00106937	0.00850183	[E] Amino acid transport and metabolism	COG0337	KO:K01735	3-dehydroquinate synthetase
R. intestinalis L1-82	ROSINTL182_RS18145	-1.13002	6.82275e-05	0.00113348
R. intestinalis L1-82	ROSINTL182_RS10560	-1.1104	8.91753e-05	0.00135377	[N] Cell motility	COG1377	KO:K02401	Flagellar biosynthesis protein FlhB
R. intestinalis L1-82	ROSINTL182_RS00210	-1.11025	0.012719	0.0485336	[F] Nucleotide transport and metabolism - [E] Amino acid transport and metabolism	COG0505	KO:K01956	Carbamoylphosphate synthase small subunit
R. intestinalis L1-82	ROSINTL182_RS00205	-1.10716	0.000102994	0.00149437	[E] Amino acid transport and metabolism - [F] Nucleotide transport and metabolism	COG0458	KO:K01955	Carbamoylphosphate synthase large subunit
R. intestinalis L1-82	ROSINTL182_RS03325	-1.10019	6.3144e-08	4.53864e-06	[K] Transcription	COG3682		Predicted transcriptional regulator
R. intestinalis L1-82	ROSINTL182_RS08740	-1.09481	0.00349905	0.0193464
R. intestinalis L1-82	ROSINTL182_RS15440	-1.0904	0.000728424	0.00631898	[S] Function unknown	COG1399	KO:K07040	Uncharacterized metal-binding protein YceD, DUF177 family
R. intestinalis L1-82	ROSINTL182_RS06905	-1.08459	0.00437337	0.0229553	[M] Cell wall/membrane/envelope biogenesis - [I] Lipid transport and metabolism	COG1887	KO:K09809	CDP-glycerol glycerophosphotransferase, TagB/SpsB family
R. intestinalis L1-82	ROSINTL182_RS13940	-1.07549	0.000238834	0.00277615	[V] Defense mechanisms	COG0841	KO:K03296	Multidrug efflux pump subunit AcrB
R. intestinalis L1-82	ROSINTL182_RS00625	-1.07381	0.00147744	0.0109089	[C] Energy production and conversion	COG0055	KO:K02112	FoF1-type ATP synthase, beta subunit
R. intestinalis L1-82	ROSINTL182_RS20230	-1.0738	0.000409572	0.004052	[G] Carbohydrate transport and metabolism	COG3507	KO:K01198	Beta-xylosidase
R. intestinalis L1-82	ROSINTL182_RS05725	-1.0719	0.0101825	0.041269	[M] Cell wall/membrane/envelope biogenesis	COG0707	KO:K03429	UDP-N-acetylglucosamine:LPS N-acetylglucosamine transferase
R. intestinalis L1-82	ROSINTL182_RS06880	-1.06029	0.0011465	0.00903353
R. intestinalis L1-82	ROSINTL182_RS05080	-1.05419	0.000984252	0.00796904	[G] Carbohydrate transport and metabolism	COG1501	KO:K01187	Alpha-glucosidase, glycosyl hydrolase family GH31
R. intestinalis L1-82	ROSINTL182_RS10025	-1.03977	0.0094936	0.0391987			KO:K06320
R. intestinalis L1-82	ROSINTL182_RS21445	-1.03447	0.000369619	0.00375158
R. intestinalis L1-82	ROSINTL182_RS18400	-1.02794	0.00162656	0.0114657
R. intestinalis L1-82	ROSINTL182_RS13240	-1.01337	0.000280067	0.00313142	[C] Energy production and conversion	COG4656	KO:K03615	Na+-translocating ferredoxin:NAD+ oxidoreductase RNF, RnfC subunit
R. intestinalis L1-82	ROSINTL182_RS02615	-1.0064	7.41594e-05	0.00118722	[J] Translation, ribosomal structure and biogenesis	COG0222	KO:K02935	Ribosomal protein L7/L12
R. intestinalis L1-82	ROSINTL182_RS17770	-1.00435	0.00390353	0.0210218	[L] Replication, recombination and repair	COG0188	KO:K02469	DNA gyrase/topoisomerase IV, subunit A
R. intestinalis L1-82	ROSINTL182_RS05645	-1.00016	0.00309584	0.0177582	[C] Energy production and conversion	COG1882	KO:K00656	Pyruvate-formate lyase
R. intestinalis L1-82	ROSINTL182_RS03255	-0.986908	0.00682405	0.0310172	[M] Cell wall/membrane/envelope biogenesis	COG0771	KO:K01925	UDP-N-acetylmuramoylalanine-D-glutamate ligase
R. intestinalis L1-82	ROSINTL182_RS00430	-0.98658	0.000734482	0.00635589	[E] Amino acid transport and metabolism	COG3968	KO:K01915	Glutamine synthetase type III
R. intestinalis L1-82	ROSINTL182_RS15695	-0.984293	0.00749192	0.0331906	[E] Amino acid transport and metabolism	COG0182	KO:K08963	Methylthioribose-1-phosphate isomerase (methionine salvage pathway), a paralog of eIF-2B alpha subunit
R. intestinalis L1-82	ROSINTL182_RS12635	-0.951781	0.012268	0.0473169	[J] Translation, ribosomal structure and biogenesis	COG0595	KO:K12574	mRNA degradation ribonuclease J1/J2
R. intestinalis L1-82	ROSINTL182_RS00630	-0.949785	0.000129794	0.00177874	[C] Energy production and conversion	COG0355	KO:K02114	FoF1-type ATP synthase, epsilon subunit
R. intestinalis L1-82	ROSINTL182_RS11750	-0.94558	0.00356674	0.0196262	[L] Replication, recombination and repair	COG0592	KO:K02338	DNA polymerase III sliding clamp (beta) subunit, PCNA homolog
R. intestinalis L1-82	ROSINTL182_RS11280	-0.940468	2.1451e-05	0.0004635	[J] Translation, ribosomal structure and biogenesis - [R] General function prediction only	COG1418	KO:K18682	HD superfamily phosphodieaserase, includes HD domain of RNase Y
R. intestinalis L1-82	ROSINTL182_RS15950	-0.938033	0.00220681	0.0140277	[K] Transcription	COG1327	KO:K07738	Transcriptional regulator NrdR, contains Zn-ribbon and ATP-cone domains
R. intestinalis L1-82	ROSINTL182_RS03490	-0.937614	0.00198749	0.0132771	[P] Inorganic ion transport and metabolism	COG0168	KO:K03498	Trk-type K+ transport system, membrane component
R. intestinalis L1-82	ROSINTL182_RS12200	-0.934186	0.0122372	0.0473099
R. intestinalis L1-82	ROSINTL182_RS13415	-0.932328	0.00130791	0.00994919
R. intestinalis L1-82	ROSINTL182_RS13220	-0.920702	0.00834449	0.0357969	[C] Energy production and conversion	COG4657	KO:K03617	Na+-translocating ferredoxin:NAD+ oxidoreductase RNF, RnfA subunit
R. intestinalis L1-82	ROSINTL182_RS09270	-0.917657	0.00902931	0.037949	[T] Signal transduction mechanisms	COG0642		Signal transduction histidine kinase
R. intestinalis L1-82	ROSINTL182_RS13265	-0.916201	0.00183138	0.012428	[I] Lipid transport and metabolism	COG0761	KO:K03527	4-Hydroxy-3-methylbut-2-enyl diphosphate reductase IspH
R. intestinalis L1-82	ROSINTL182_RS11525	-0.915252	0.00311819	0.0178284	[D] Cell cycle control, cell division, chromosome partitioning	COG2894	KO:K03609	Septum formation inhibitor-activating ATPase MinD
R. intestinalis L1-82	ROSINTL182_RS11435	-0.908124	0.00570198	0.0276124	[T] Signal transduction mechanisms	COG2199		GGDEF domain, diguanylate cyclase (c-di-GMP synthetase) or its enzymatically inactive variants
R. intestinalis L1-82	ROSINTL182_RS04210	-0.905322	0.0101695	0.0412639	[R] General function prediction only	COG1032		Radical SAM superfamily enzyme YgiQ, UPF0313 family
R. intestinalis L1-82	ROSINTL182_RS13235	-0.893889	0.00593348	0.0282402	[C] Energy production and conversion	COG4658	KO:K03614 - KO:K03615	Na+-translocating ferredoxin:NAD+ oxidoreductase RNF, RnfD subunit
R. intestinalis L1-82	ROSINTL182_RS14315	-0.890478	0.00645777	0.0298823	[F] Nucleotide transport and metabolism	COG0503	KO:K03816	Adenine/guanine phosphoribosyltransferase or related PRPP-binding protein
R. intestinalis L1-82	ROSINTL182_RS00620	-0.887776	0.00123608	0.0095681	[C] Energy production and conversion	COG0224	KO:K02115	FoF1-type ATP synthase, gamma subunit
R. intestinalis L1-82	ROSINTL182_RS06955	-0.878414	0.00742987	0.0329988
R. intestinalis L1-82	ROSINTL182_RS18075	-0.860834	0.00631284	0.0294196	[S] Function unknown	COG1655	KO:K09766	Uncharacterized protein, DUF2225 family
R. intestinalis L1-82	ROSINTL182_RS00075	-0.84912	0.00257979	0.0155328	[F] Nucleotide transport and metabolism	COG0519	KO:K01951	GMP synthase, PP-ATPase domain/subunit
R. intestinalis L1-82	ROSINTL182_RS17170	-0.841747	0.000285179	0.00317848	[J] Translation, ribosomal structure and biogenesis	COG0292	KO:K02887	Ribosomal protein L20
R. intestinalis L1-82	ROSINTL182_RS12250	-0.840295	0.00362592	0.0198917	[X] Mobilome: prophages, transposons	COG2801		Transposase InsO and inactivated derivatives
R. intestinalis L1-82	ROSINTL182_RS04420	-0.832549	0.00055269	0.00508244	[D] Cell cycle control, cell division, chromosome partitioning	COG0206	KO:K03531	Cell division GTPase FtsZ
R. intestinalis L1-82	ROSINTL182_RS08105	-0.818805	0.00514166	0.0257964
R. intestinalis L1-82	ROSINTL182_RS05910	-0.810153	0.000101152	0.00148013	[O] Posttranslational modification, protein turnover, chaperones	COG0641	KO:K06871	Sulfatase maturation enzyme AslB, radical SAM superfamily
R. intestinalis L1-82	ROSINTL182_RS12740	-0.808265	0.00190096	0.0127771	[E] Amino acid transport and metabolism	COG0436	KO:K10206	Aspartate/methionine/tyrosine aminotransferase
R. intestinalis L1-82	ROSINTL182_RS08440	-0.791725	0.0099371	0.0406959
R. intestinalis L1-82	ROSINTL182_RS12400	-0.767162	0.00993205	0.0406959	[J] Translation, ribosomal structure and biogenesis	COG0096	KO:K02994	Ribosomal protein S8
R. intestinalis L1-82	ROSINTL182_RS12320	-0.757919	0.00265937	0.0159021	[J] Translation, ribosomal structure and biogenesis	COG0203	KO:K02879	Ribosomal protein L17
R. intestinalis L1-82	ROSINTL182_RS13215	-0.738806	0.0129925	0.0492037	[C] Energy production and conversion	COG2878		Na+-translocating ferredoxin:NAD+ oxidoreductase RNF, RnfB subunit
R. intestinalis L1-82	ROSINTL182_RS00435	-0.737333	0.00251511	0.0153522	[G] Carbohydrate transport and metabolism	COG0191	KO:K01624	Fructose/tagatose bisphosphate aldolase
R. intestinalis L1-82	ROSINTL182_RS12430	-0.728795	0.0110922	0.0436012	[J] Translation, ribosomal structure and biogenesis	COG0255	KO:K02904	Ribosomal protein L29
R. intestinalis L1-82	ROSINTL182_RS10520	-0.723343	0.0114434	0.0448815	[T] Signal transduction mechanisms	COG1776	KO:K03410	Chemotaxis protein CheY-P-specific phosphatase CheC
R. intestinalis L1-82	ROSINTL182_RS10725	-0.718356	0.00821046	0.0354378	[G] Carbohydrate transport and metabolism	COG1523	KO:K02438	Pullulanase/glycogen debranching enzyme
R. intestinalis L1-82	ROSINTL182_RS05360	-0.713179	0.00959697	0.0395791	[G] Carbohydrate transport and metabolism	COG0366	KO:K01187	Glycosidase
R. intestinalis L1-82	ROSINTL182_RS02220	-0.700855	0.00921159	0.0384854	[M] Cell wall/membrane/envelope biogenesis	COG0449	KO:K00820	Glucosamine 6-phosphate synthetase, contains amidotransferase and phosphosugar isomerase domains
R. intestinalis L1-82	ROSINTL182_RS18080	-0.700121	0.00037973	0.00381798	[J] Translation, ribosomal structure and biogenesis	COG0008	KO:K01886	Glutamyl- or glutaminyl-tRNA synthetase
R. intestinalis L1-82	ROSINTL182_RS17650	-0.688133	5.50428e-05	0.000941072	[J] Translation, ribosomal structure and biogenesis	COG0050	KO:K02358	Translation elongation factor EF-Tu, a GTPase
R. intestinalis L1-82	ROSINTL182_RS04980	-0.686527	0.00998285	0.0408064	[V] Defense mechanisms	COG3853		Uncharacterized conserved protein YaaN involved in tellurite resistance
R. intestinalis L1-82	ROSINTL182_RS15130	-0.67646	0.00846382	0.0362206
R. intestinalis L1-82	ROSINTL182_RS12385	-0.666704	0.000657439	0.00586203	[J] Translation, ribosomal structure and biogenesis	COG0098	KO:K02988	Ribosomal protein S5
R. intestinalis L1-82	ROSINTL182_RS10530	-0.650541	0.00252637	0.0153535	[T] Signal transduction mechanisms - [N] Cell motility	COG0643	KO:K03407	Chemotaxis protein histidine kinase CheA
R. intestinalis L1-82	ROSINTL182_RS12370	-0.639447	0.00470357	0.0240785	[U] Intracellular trafficking, secretion, and vesicular transport	COG0201	KO:K03076	Preprotein translocase subunit SecY
R. intestinalis L1-82	ROSINTL182_RS12335	-0.573989	0.0028669	0.0168056	[J] Translation, ribosomal structure and biogenesis	COG0100	KO:K02948	Ribosomal protein S11
R. intestinalis L1-82	ROSINTL182_RS17660	-0.567737	0.00280199	0.0165619	[J] Translation, ribosomal structure and biogenesis	COG0049	KO:K02992	Ribosomal protein S7
R. intestinalis L1-82	ROSINTL182_RS06640	-0.516292	0.0130797	0.0494276	[L] Replication, recombination and repair	COG0629	KO:K03111	Single-stranded DNA-binding protein
R. intestinalis L1-82	ROSINTL182_RS12455	-0.505514	0.00250137	0.0152949	[J] Translation, ribosomal structure and biogenesis	COG0090	KO:K02886	Ribosomal protein L2
R. intestinalis L1-82	ROSINTL182_RS12325	-0.43143	0.0110374	0.0434342	[K] Transcription	COG0202	KO:K03040	DNA-directed RNA polymerase, alpha subunit/40 kD subunit
R. intestinalis L1-82	ROSINTL182_RS19495	0.602152	0.00794762	0.0346001
R. intestinalis L1-82	ROSINTL182_RS01065	0.725646	0.00601311	0.0284653
R. intestinalis L1-82	ROSINTL182_RS00945	0.746043	0.0102694	0.0413831	[H] Coenzyme transport and metabolism	COG1521	KO:K03525	Pantothenate kinase type III
R. intestinalis L1-82	ROSINTL182_RS07065	0.751989	0.0116563	0.0455052	[M] Cell wall/membrane/envelope biogenesis	COG1091	KO:K00067	dTDP-4-dehydrorhamnose reductase
R. intestinalis L1-82	ROSINTL182_RS11245	0.756568	0.00685692	0.0310412	[G] Carbohydrate transport and metabolism	COG1015	KO:K01839	Phosphopentomutase
R. intestinalis L1-82	ROSINTL182_RS02725	0.77806	0.0115032	0.0450658	[M] Cell wall/membrane/envelope biogenesis	COG2089	KO:K01654 - KO:K15898	Sialic acid synthase SpsE, contains C-terminal SAF domain
R. intestinalis L1-82	ROSINTL182_RS10625	0.800319	0.000695146	0.0061055
R. intestinalis L1-82	ROSINTL182_RS04015	0.813979	0.000799629	0.00685229	[J] Translation, ribosomal structure and biogenesis	COG1293		Predicted component of the ribosome quality control (RQC) complex, YloA/Tae2 family, contains fibronectin-binding (FbpA) and DUF814 domains
R. intestinalis L1-82	ROSINTL182_RS03515	0.826296	0.00174428	0.0119988	[E] Amino acid transport and metabolism	COG0410	KO:K01996	ABC-type branched-chain amino acid transport system, ATPase component
R. intestinalis L1-82	ROSINTL182_RS00970	0.837145	0.0105633	0.0422772			KO:K07027
R. intestinalis L1-82	ROSINTL182_RS15670	0.849386	0.00373893	0.0203532	[E] Amino acid transport and metabolism	COG0703	KO:K00891	Shikimate kinase
R. intestinalis L1-82	ROSINTL182_RS03570	0.858827	4.93112e-05	0.000890636	[E] Amino acid transport and metabolism	COG0747	KO:K02035	ABC-type transport system, periplasmic component
R. intestinalis L1-82	ROSINTL182_RS16080	0.862422	0.00474962	0.0242532	[V] Defense mechanisms	COG0534		Na+-driven multidrug efflux pump
R. intestinalis L1-82	ROSINTL182_RS14840	0.867067	0.00914238	0.0382871	[E] Amino acid transport and metabolism	COG0548	KO:K00930	Acetylglutamate kinase
R. intestinalis L1-82	ROSINTL182_RS07095	0.867614	0.00084902	0.00714542
R. intestinalis L1-82	ROSINTL182_RS01180	0.883998	2.44505e-05	0.000518762
R. intestinalis L1-82	ROSINTL182_RS11350	0.885774	0.000642219	0.00575545
R. intestinalis L1-82	ROSINTL182_RS15010	0.892823	0.0021289	0.0137075	[O] Posttranslational modification, protein turnover, chaperones	COG0465	KO:K03798	ATP-dependent Zn proteases
R. intestinalis L1-82	ROSINTL182_RS04250	0.896828	0.00282217	0.0166494	[J] Translation, ribosomal structure and biogenesis	COG1534	KO:K07574	RNA-binding protein YhbY
R. intestinalis L1-82	ROSINTL182_RS00355	0.904587	0.00572642	0.027628	[M] Cell wall/membrane/envelope biogenesis	COG5009	KO:K05366	Membrane carboxypeptidase/penicillin-binding protein
R. intestinalis L1-82	ROSINTL182_RS06080	0.905081	0.00160077	0.0114118
R. intestinalis L1-82	ROSINTL182_RS08570	0.908206	0.00888766	0.0374545	[G] Carbohydrate transport and metabolism	COG1879	KO:K17213	ABC-type sugar transport system, periplasmic component, contains N-terminal xre family HTH domain
R. intestinalis L1-82	ROSINTL182_RS07070	0.923628	0.0125375	0.047997	[T] Signal transduction mechanisms - [G] Carbohydrate transport and metabolism	COG1925	KO:K11189	Phosphotransferase system, HPr and related phosphotransfer proteins
R. intestinalis L1-82	ROSINTL182_RS21940	0.923712	0.0125871	0.0481344
R. intestinalis L1-82	ROSINTL182_RS14760	0.929731	0.000160717	0.0020423	[S] Function unknown	COG5523		Uncharacterized membrane protein
R. intestinalis L1-82	ROSINTL182_RS02300	0.937129	8.63608e-05	0.00131672	[E] Amino acid transport and metabolism	COG2309		Leucyl aminopeptidase (aminopeptidase T)
R. intestinalis L1-82	ROSINTL182_RS03510	0.9375	0.0036929	0.0201888	[F] Nucleotide transport and metabolism	COG1102		Cytidylate kinase
R. intestinalis L1-82	ROSINTL182_RS04245	0.940621	3.29207e-05	0.00066636	[D] Cell cycle control, cell division, chromosome partitioning - [L] Replication, recombination and repair	COG0536	KO:K03979	GTPase involved in cell partioning and DNA repair
R. intestinalis L1-82	ROSINTL182_RS08255	0.943384	0.00882973	0.0372954	[V] Defense mechanisms	COG1566		Multidrug resistance efflux pump
R. intestinalis L1-82	ROSINTL182_RS20215	0.947344	0.00983819	0.0404318	[V] Defense mechanisms	COG1680		CubicO group peptidase, beta-lactamase class C family
R. intestinalis L1-82	ROSINTL182_RS00325	0.949008	0.00162773	0.0114657
R. intestinalis L1-82	ROSINTL182_RS10685	0.952589	0.00999167	0.0408064	[N] Cell motility	COG1815	KO:K02387	Flagellar basal body rod protein FlgB
R. intestinalis L1-82	ROSINTL182_RS03150	0.9764	0.0126798	0.0484363	[P] Inorganic ion transport and metabolism - [C] Energy production and conversion	COG1668	KO:K09696	ABC-type Na+ efflux pump, permease component
R. intestinalis L1-82	ROSINTL182_RS15755	0.9778	0.0041515	0.0220537	[J] Translation, ribosomal structure and biogenesis	COG1214		tRNA A37 threonylcarbamoyladenosine modification protein TsaB
R. intestinalis L1-82	ROSINTL182_RS05500	0.993541	0.0105629	0.0422772	[J] Translation, ribosomal structure and biogenesis	COG0101	KO:K06173	tRNA U38,U39,U40 pseudouridine synthase TruA
R. intestinalis L1-82	ROSINTL182_RS10100	1.00555	3.96245e-05	0.000762609
R. intestinalis L1-82	ROSINTL182_RS10105	1.01667	0.0022105	0.0140277	[N] Cell motility - [K] Transcription	COG2747	KO:K02398	Negative regulator of flagellin synthesis (anti-sigma28 factor)
R. intestinalis L1-82	ROSINTL182_RS02750	1.04502	0.00851694	0.0364037	[R] General function prediction only	COG2333	KO:K02238	Metal-dependent hydrolase, beta-lactamase superfamily II
R. intestinalis L1-82	ROSINTL182_RS15515	1.0481	0.000380497	0.00381798	[S] Function unknown	COG4485		Uncharacterized membrane protein YfhO
R. intestinalis L1-82	ROSINTL182_RS08265	1.05515	0.00224626	0.0141527	[V] Defense mechanisms	COG0577	KO:K02004	ABC-type antimicrobial peptide transport system, permease component
R. intestinalis L1-82	ROSINTL182_RS21510	1.07317	0.00457976	0.0236509
R. intestinalis L1-82	ROSINTL182_RS05895	1.09983	5.48363e-05	0.000941072	[E] Amino acid transport and metabolism	COG0112	KO:K00600	Glycine/serine hydroxymethyltransferase
R. intestinalis L1-82	ROSINTL182_RS01000	1.10121	4.40466e-07	2.15461e-05
R. intestinalis L1-82	ROSINTL182_RS07780	1.10404	7.38213e-05	0.00118721
R. intestinalis L1-82	ROSINTL182_RS04780	1.1058	0.00396179	0.0212705	[J] Translation, ribosomal structure and biogenesis - [U] Intracellular trafficking, secretion, and vesicular transport	COG0252	KO:K01424	L-asparaginase/archaeal Glu-tRNAGln amidotransferase subunit D
R. intestinalis L1-82	ROSINTL182_RS15780	1.11161	0.00586216	0.028088	[J] Translation, ribosomal structure and biogenesis	COG0533	KO:K01409	tRNA A37 threonylcarbamoyltransferase TsaD
R. intestinalis L1-82	ROSINTL182_RS06325	1.12003	0.00166324	0.011646			KO:K02004
R. intestinalis L1-82	ROSINTL182_RS07915	1.12159	0.00334687	0.0186514	[R] General function prediction only	COG0488	KO:K06158	ATPase components of ABC transporters with duplicated ATPase domains
R. intestinalis L1-82	ROSINTL182_RS13625	1.12528	0.00689131	0.0311569	[K] Transcription	COG1609	KO:K02529	DNA-binding transcriptional regulator, LacI/PurR family
R. intestinalis L1-82	ROSINTL182_RS01735	1.13058	0.00204924	0.0135063
R. intestinalis L1-82	ROSINTL182_RS03145	1.13064	0.0101087	0.0412069	[G] Carbohydrate transport and metabolism - [M] Cell wall/membrane/envelope biogenesis	COG0726		Peptidoglycan/xylan/chitin deacetylase, PgdA/CDA1 family
R. intestinalis L1-82	ROSINTL182_RS03715	1.13899	0.00646517	0.0298823	[O] Posttranslational modification, protein turnover, chaperones	COG0826	KO:K08303	Collagenase-like protease, PrtC family
R. intestinalis L1-82	ROSINTL182_RS15520	1.14382	0.000331671	0.00346631
R. intestinalis L1-82	ROSINTL182_RS14835	1.1555	0.000238339	0.00277615	[E] Amino acid transport and metabolism	COG4992	KO:K00821	Acetylornithine/succinyldiaminopimelate/putrescine aminotransferase
R. intestinalis L1-82	ROSINTL182_RS17095	1.17585	0.00344988	0.0191648	[I] Lipid transport and metabolism	COG0821	KO:K03526	4-hydroxy-3-methylbut-2-en-1-yl diphosphate synthase IspG/GcpE
R. intestinalis L1-82	ROSINTL182_RS07100	1.18645	8.36549e-07	3.54979e-05
R. intestinalis L1-82	ROSINTL182_RS00225	1.19134	0.0076103	0.0335463	[E] Amino acid transport and metabolism	COG0460	KO:K00003	Homoserine dehydrogenase
R. intestinalis L1-82	ROSINTL182_RS19100	1.19488	0.00657805	0.0301665	[M] Cell wall/membrane/envelope biogenesis	COG0787	KO:K01775	Alanine racemase
R. intestinalis L1-82	ROSINTL182_RS04030	1.22641	0.000477002	0.00456522
R. intestinalis L1-82	ROSINTL182_RS16070	1.23285	2.82829e-05	0.000592162	[P] Inorganic ion transport and metabolism	COG2217	KO:K17686	Cation transport ATPase
R. intestinalis L1-82	ROSINTL182_RS19105	1.24813	0.000481203	0.00458053	[F] Nucleotide transport and metabolism	COG0063	KO:K17759	NAD(P)H-hydrate repair enzyme Nnr, NAD(P)H-hydrate dehydratase domain
R. intestinalis L1-82	ROSINTL182_RS03245	1.25729	1.17915e-05	0.000277149	[E] Amino acid transport and metabolism - [K] Transcription	COG1167		DNA-binding transcriptional regulator, MocR family, contains an aminotransferase domain
R. intestinalis L1-82	ROSINTL182_RS14040	1.25761	0.00199664	0.0132933	[V] Defense mechanisms	COG1132	KO:K06147	ABC-type multidrug transport system, ATPase and permease component
R. intestinalis L1-82	ROSINTL182_RS10750	1.2596	0.000909718	0.00750357	[G] Carbohydrate transport and metabolism	COG2182	KO:K15770	Maltose-binding periplasmic protein MalE
R. intestinalis L1-82	ROSINTL182_RS16105	1.26377	0.000458075	0.00443225
R. intestinalis L1-82	ROSINTL182_RS04500	1.26626	0.00317268	0.0180135	[K] Transcription	COG1846		DNA-binding transcriptional regulator, MarR family
R. intestinalis L1-82	ROSINTL182_RS04585	1.26963	0.00173586	0.0119642
R. intestinalis L1-82	ROSINTL182_RS05495	1.27063	0.000229689	0.00268759	[H] Coenzyme transport and metabolism	COG0619	KO:K16785	Energy-coupling factor transporter transmembrane protein EcfT
R. intestinalis L1-82	ROSINTL182_RS05475	1.27509	0.00828515	0.0356292	[E] Amino acid transport and metabolism	COG0436	KO:K10907	Aspartate/methionine/tyrosine aminotransferase
R. intestinalis L1-82	ROSINTL182_RS13920	1.28285	0.00634001	0.0294196
R. intestinalis L1-82	ROSINTL182_RS14345	1.28658	0.000310746	0.00334018	[L] Replication, recombination and repair	COG0177	KO:K10773	Endonuclease III
R. intestinalis L1-82	ROSINTL182_RS03860	1.29059	0.00780478	0.0340625			KO:K05364
R. intestinalis L1-82	ROSINTL182_RS10680	1.30941	0.000119002	0.0016632	[N] Cell motility	COG1558	KO:K02388	Flagellar basal body rod protein FlgC
R. intestinalis L1-82	ROSINTL182_RS06705	1.32093	0.0035614	0.0196262	[G] Carbohydrate transport and metabolism	COG0524	KO:K00847	Sugar or nucleoside kinase, ribokinase family
R. intestinalis L1-82	ROSINTL182_RS06220	1.32888	0.00444785	0.0231356
R. intestinalis L1-82	ROSINTL182_RS15775	1.32987	0.000462526	0.00445594
R. intestinalis L1-82	ROSINTL182_RS17955	1.34222	4.35571e-05	0.000803184
R. intestinalis L1-82	ROSINTL182_RS13335	1.35376	7.3306e-07	3.28451e-05	[I] Lipid transport and metabolism	COG1502	KO:K06131	Phosphatidylserine/phosphatidylglycerophosphate/cardiolipin synthase or related enzyme
R. intestinalis L1-82	ROSINTL182_RS01210	1.35842	0.00347472	0.0192421	[T] Signal transduction mechanisms - [K] Transcription	COG0745		DNA-binding response regulator, OmpR family, contains REC and winged-helix (wHTH) domain
R. intestinalis L1-82	ROSINTL182_RS05490	1.35998	0.000561358	0.00513533	[R] General function prediction only - [P] Inorganic ion transport and metabolism	COG1122	KO:K16787	Energy-coupling factor transporter ATP-binding protein EcfA2
R. intestinalis L1-82	ROSINTL182_RS09615	1.36303	0.00222329	0.0140582	[M] Cell wall/membrane/envelope biogenesis	COG4591	KO:K02004	ABC-type transport system, involved in lipoprotein release, permease component
R. intestinalis L1-82	ROSINTL182_RS16275	1.36731	0.000141613	0.00186802	[M] Cell wall/membrane/envelope biogenesis	COG0438		Glycosyltransferase involved in cell wall bisynthesis
R. intestinalis L1-82	ROSINTL182_RS05465	1.37418	0.000418936	0.00412149	[O] Posttranslational modification, protein turnover, chaperones	COG0309		Hydrogenase maturation factor
R. intestinalis L1-82	ROSINTL182_RS14855	1.37796	6.06081e-05	0.00102135	[E] Amino acid transport and metabolism	COG0002	KO:K00145	N-acetyl-gamma-glutamylphosphate reductase
R. intestinalis L1-82	ROSINTL182_RS16190	1.38179	0.00029045	0.00321687
R. intestinalis L1-82	ROSINTL182_RS05690	1.3849	0.0116799	0.0455052	[S] Function unknown	COG4466		Uncharacterized protein Veg
R. intestinalis L1-82	ROSINTL182_RS10280	1.38527	0.00294306	0.0170484	[P] Inorganic ion transport and metabolism - [E] Amino acid transport and metabolism	COG1173	KO:K15582	ABC-type dipeptide/oligopeptide/nickel transport system, permease component
R. intestinalis L1-82	ROSINTL182_RS15225	1.39768	0.000141027	0.00186729	[C] Energy production and conversion	COG1979		Alcohol dehydrogenase YqhD, Fe-dependent ADH family
R. intestinalis L1-82	ROSINTL182_RS17825	1.40567	7.06585e-05	0.00116289	[R] General function prediction only	COG1160	KO:K03977	Predicted GTPases
R. intestinalis L1-82	ROSINTL182_RS00695	1.41303	6.39906e-06	0.000172042	[E] Amino acid transport and metabolism	COG0334	KO:K00262	Glutamate dehydrogenase/leucine dehydrogenase
R. intestinalis L1-82	ROSINTL182_RS10715	1.42267	0.00698035	0.0314786	[J] Translation, ribosomal structure and biogenesis	COG0564	KO:K06180	Pseudouridylate synthase, 23S rRNA- or tRNA-specific
R. intestinalis L1-82	ROSINTL182_RS16300	1.42711	0.0019669	0.01317	[L] Replication, recombination and repair	COG0550	KO:K03169	DNA topoisomerase IA
R. intestinalis L1-82	ROSINTL182_RS04785	1.43217	0.00574193	0.027665	[E] Amino acid transport and metabolism	COG2008	KO:K01620	Threonine aldolase
R. intestinalis L1-82	ROSINTL182_RS10675	1.44065	0.000142271	0.0018697	[N] Cell motility	COG1677	KO:K02408	Flagellar hook-basal body complex protein FliE
R. intestinalis L1-82	ROSINTL182_RS05480	1.44289	0.011961	0.0462929	[J] Translation, ribosomal structure and biogenesis	COG0219	KO:K03216	tRNA(Leu) C34 or U34 (ribose-2'-O)-methylase TrmL, contains SPOUT domain
R. intestinalis L1-82	ROSINTL182_RS16955	1.44498	0.00535558	0.0263934	[K] Transcription	COG3695	KO:K07443	Alkylated DNA nucleotide flippase Atl1, participates in nucleotide excision repair, Ada-like DNA-binding domain
R. intestinalis L1-82	ROSINTL182_RS06295	1.44713	0.00131158	0.00995553	[R] General function prediction only	COG1373	KO:K07133	Predicted ATPase, AAA+ superfamily
R. intestinalis L1-82	ROSINTL182_RS17740	1.45104	0.00154051	0.011196	[E] Amino acid transport and metabolism	COG0069	KO:K00284	Glutamate synthase domain 2
R. intestinalis L1-82	ROSINTL182_RS14135	1.46747	1.38662e-05	0.000317123	[E] Amino acid transport and metabolism	COG0436	KO:K11358	Aspartate/methionine/tyrosine aminotransferase
R. intestinalis L1-82	ROSINTL182_RS10275	1.47254	8.39403e-05	0.00129596	[P] Inorganic ion transport and metabolism - [E] Amino acid transport and metabolism	COG0444	KO:K15583	ABC-type dipeptide/oligopeptide/nickel transport system, ATPase component
R. intestinalis L1-82	ROSINTL182_RS05470	1.52277	3.44838e-05	0.000686168	[K] Transcription	COG1522		DNA-binding transcriptional regulator, Lrp family
R. intestinalis L1-82	ROSINTL182_RS13550	1.52887	0.000723338	0.00629474	[K] Transcription	COG0583		DNA-binding transcriptional regulator, LysR family
R. intestinalis L1-82	ROSINTL182_RS14845	1.53729	0.000145356	0.00189609	[E] Amino acid transport and metabolism	COG1364	KO:K00620	N-acetylglutamate synthase (N-acetylornithine aminotransferase)
R. intestinalis L1-82	ROSINTL182_RS02420	1.55282	0.000708497	0.00619187	[V] Defense mechanisms	COG0577	KO:K02004	ABC-type antimicrobial peptide transport system, permease component
R. intestinalis L1-82	ROSINTL182_RS13345	1.57306	5.2119e-05	0.000930737
R. intestinalis L1-82	ROSINTL182_RS03535	1.57733	0.000275383	0.00308884	[E] Amino acid transport and metabolism	COG0683	KO:K01999	ABC-type branched-chain amino acid transport system, periplasmic component
R. intestinalis L1-82	ROSINTL182_RS16115	1.5828	0.000201702	0.00243286	[F] Nucleotide transport and metabolism - [T] Signal transduction mechanisms	COG2357	KO:K07816	ppGpp synthetase catalytic domain (RelA/SpoT-type nucleotidyltranferase)
R. intestinalis L1-82	ROSINTL182_RS10745	1.61861	1.36116e-06	5.21088e-05	[N] Cell motility - [T] Signal transduction mechanisms	COG0840		Methyl-accepting chemotaxis protein
R. intestinalis L1-82	ROSINTL182_RS05205	1.63404	0.000190485	0.00236166	[T] Signal transduction mechanisms	COG0642		Signal transduction histidine kinase
R. intestinalis L1-82	ROSINTL182_RS02745	1.64285	0.00813343	0.0352496	[I] Lipid transport and metabolism	COG0245	KO:K01770	2C-methyl-D-erythritol 2,4-cyclodiphosphate synthase
R. intestinalis L1-82	ROSINTL182_RS02435	1.64833	9.01351e-06	0.000225146	[M] Cell wall/membrane/envelope biogenesis - [V] Defense mechanisms	COG0845	KO:K02005	Multidrug efflux pump subunit AcrA (membrane-fusion protein)
R. intestinalis L1-82	ROSINTL182_RS00305	1.65483	0.00112602	0.00889202
R. intestinalis L1-82	ROSINTL182_RS00980	1.66214	0.00289322	0.0168429
R. intestinalis L1-82	ROSINTL182_RS16545	1.66452	0.00682732	0.0310172	[G] Carbohydrate transport and metabolism	COG3250	KO:K01190	Beta-galactosidase/beta-glucuronidase
R. intestinalis L1-82	ROSINTL182_RS12120	1.66849	0.000467318	0.00448473	[P] Inorganic ion transport and metabolism	COG2217		Cation transport ATPase
R. intestinalis L1-82	ROSINTL182_RS04855	1.70881	0.00818545	0.0353732	[P] Inorganic ion transport and metabolism	COG0659		Sulfate permease or related transporter, MFS superfamily
R. intestinalis L1-82	ROSINTL182_RS18520	1.70894	0.0018865	0.0127041
R. intestinalis L1-82	ROSINTL182_RS06710	1.71566	7.7703e-05	0.00123514
R. intestinalis L1-82	ROSINTL182_RS12270	1.72013	0.000249833	0.00284294
R. intestinalis L1-82	ROSINTL182_RS17735	1.72098	0.000758998	0.00651998	[R] General function prediction only - [E] Amino acid transport and metabolism	COG0493	KO:K00266	NADPH-dependent glutamate synthase beta chain or related oxidoreductase
R. intestinalis L1-82	ROSINTL182_RS10285	1.72163	1.94406e-05	0.000422654	[P] Inorganic ion transport and metabolism - [E] Amino acid transport and metabolism	COG0601	KO:K15581	ABC-type dipeptide/oligopeptide/nickel transport system, permease component
R. intestinalis L1-82	ROSINTL182_RS07195	1.74717	0.00172236	0.0119178
R. intestinalis L1-82	ROSINTL182_RS14025	1.77152	1.14679e-05	0.000272905			KO:K03574
R. intestinalis L1-82	ROSINTL182_RS16970	1.77196	0.00285462	0.0167846
R. intestinalis L1-82	ROSINTL182_RS03075	1.79136	1.12926e-05	0.000270562	[G] Carbohydrate transport and metabolism	COG0058	KO:K00688	Glucan phosphorylase
R. intestinalis L1-82	ROSINTL182_RS04720	1.79509	1.40182e-05	0.000318529
R. intestinalis L1-82	ROSINTL182_RS18255	1.81651	2.09461e-07	1.17326e-05
R. intestinalis L1-82	ROSINTL182_RS17835	1.82694	7.26627e-05	0.00118372	[V] Defense mechanisms	COG1131	KO:K01990	ABC-type multidrug transport system, ATPase component
R. intestinalis L1-82	ROSINTL182_RS11070	1.84888	0.00873032	0.0370907	[L] Replication, recombination and repair	COG1961		Site-specific DNA recombinase related to the DNA invertase Pin
R. intestinalis L1-82	ROSINTL182_RS03940	1.85809	0.000548731	0.00505924	[G] Carbohydrate transport and metabolism	COG0395	KO:K17320	ABC-type glycerol-3-phosphate transport system, permease component
R. intestinalis L1-82	ROSINTL182_RS07310	1.86463	1.80624e-06	6.32617e-05	[K] Transcription	COG0583		DNA-binding transcriptional regulator, LysR family
R. intestinalis L1-82	ROSINTL182_RS05040	1.8683	3.41654e-05	0.000683695	[M] Cell wall/membrane/envelope biogenesis	COG1136	KO:K02003	ABC-type lipoprotein export system, ATPase component
R. intestinalis L1-82	ROSINTL182_RS16280	1.86906	5.5536e-05	0.000944916	[R] General function prediction only	COG1636	KO:K09765	Predicted ATPase, Adenine nucleotide alpha hydrolases (AANH) superfamily
R. intestinalis L1-82	ROSINTL182_RS07250	1.8898	0.00410893	0.02196	[K] Transcription	COG2207		AraC-type DNA-binding domain and AraC-containing proteins
R. intestinalis L1-82	ROSINTL182_RS12020	1.9031	0.0128039	0.0486991
R. intestinalis L1-82	ROSINTL182_RS16075	1.90961	0.00319478	0.0180321	[K] Transcription	COG1937		DNA-binding transcriptional regulator, FrmR family
R. intestinalis L1-82	ROSINTL182_RS19125	1.91109	1.29272e-07	7.71686e-06	[C] Energy production and conversion	COG0538	KO:K00031	Isocitrate dehydrogenase
R. intestinalis L1-82	ROSINTL182_RS01730	1.9198	8.02484e-07	3.47661e-05
R. intestinalis L1-82	ROSINTL182_RS13320	1.92047	0.000898392	0.00748023	[K] Transcription	COG1386	KO:K06024	Chromosome segregation and condensation protein ScpB
R. intestinalis L1-82	ROSINTL182_RS17990	1.94363	7.48604e-08	5.07035e-06			KO:K07814
R. intestinalis L1-82	ROSINTL182_RS10300	1.94379	5.4047e-06	0.000148714	[J] Translation, ribosomal structure and biogenesis	COG1179		tRNA A37 threonylcarbamoyladenosine dehydratase
R. intestinalis L1-82	ROSINTL182_RS11960	1.95134	0.00178982	0.0122166	[C] Energy production and conversion	COG0055	KO:K02112	FoF1-type ATP synthase, beta subunit
R. intestinalis L1-82	ROSINTL182_RS10325	1.99051	2.57891e-09	2.94398e-07
R. intestinalis L1-82	ROSINTL182_RS01150	1.99059	1.64602e-06	6.03885e-05	[N] Cell motility - [K] Transcription - [T] Signal transduction mechanisms	COG4862	KO:K16511	Negative regulator of genetic competence, sporulation and motility
R. intestinalis L1-82	ROSINTL182_RS02430	2.00687	7.27776e-06	0.000189869	[M] Cell wall/membrane/envelope biogenesis	COG1136	KO:K02003	ABC-type lipoprotein export system, ATPase component
R. intestinalis L1-82	ROSINTL182_RS16965	2.01744	6.46425e-05	0.00108415
R. intestinalis L1-82	ROSINTL182_RS11970	2.01994	0.000560724	0.00513533	[C] Energy production and conversion	COG0056	KO:K02111	FoF1-type ATP synthase, alpha subunit
R. intestinalis L1-82	ROSINTL182_RS01695	2.02442	0.00207527	0.0135605	[K] Transcription	COG1414		DNA-binding transcriptional regulator, IclR family
R. intestinalis L1-82	ROSINTL182_RS16295	2.02611	3.70455e-05	0.000724858	[R] General function prediction only	COG1672	KO:K06921	Predicted ATPase, archaeal AAA+ ATPase superfamily
R. intestinalis L1-82	ROSINTL182_RS13560	2.04849	0.00648698	0.0299438
R. intestinalis L1-82	ROSINTL182_RS18260	2.05437	4.29825e-06	0.000124085
R. intestinalis L1-82	ROSINTL182_RS17860	2.05892	0.00240726	0.0147965	[X] Mobilome: prophages, transposons	COG3668		Plasmid stabilization system protein ParE
R. intestinalis L1-82	ROSINTL182_RS05210	2.08236	1.75712e-09	2.2102e-07	[K] Transcription - [T] Signal transduction mechanisms	COG0745		DNA-binding response regulator, OmpR family, contains REC and winged-helix (wHTH) domain
R. intestinalis L1-82	ROSINTL182_RS07545	2.10699	1.79705e-06	6.32617e-05	[H] Coenzyme transport and metabolism	COG0007	KO:K02302	Uroporphyrinogen-III methylase (siroheme synthase)
R. intestinalis L1-82	ROSINTL182_RS10315	2.11904	7.91143e-07	3.47661e-05	[C] Energy production and conversion	COG0546	KO:K01091	Phosphoglycolate phosphatase, HAD superfamily
R. intestinalis L1-82	ROSINTL182_RS16290	2.11925	4.79095e-06	0.000133918	[E] Amino acid transport and metabolism	COG0136	KO:K00133	Aspartate-semialdehyde dehydrogenase
R. intestinalis L1-82	ROSINTL182_RS14030	2.12504	3.94622e-08	3.23223e-06	[F] Nucleotide transport and metabolism	COG1051	KO:K03574	ADP-ribose pyrophosphatase YjhB, NUDIX family
R. intestinalis L1-82	ROSINTL182_RS19520	2.12603	0.000909323	0.00750357
R. intestinalis L1-82	ROSINTL182_RS13875	2.13226	0.000821006	0.00696767	[P] Inorganic ion transport and metabolism - [C] Energy production and conversion	COG1151	KO:K05601	Hydroxylamine reductase (hybrid-cluster protein)
R. intestinalis L1-82	ROSINTL182_RS06660	2.15506	0.00210286	0.0136395	[G] Carbohydrate transport and metabolism	COG3693	KO:K01181	Endo-1,4-beta-xylanase, GH35 family
R. intestinalis L1-82	ROSINTL182_RS05230	2.15667	2.69517e-12	5.08943e-10	[T] Signal transduction mechanisms	COG2199		GGDEF domain, diguanylate cyclase (c-di-GMP synthetase) or its enzymatically inactive variants
R. intestinalis L1-82	ROSINTL182_RS10305	2.19638	7.36731e-07	3.28451e-05	[R] General function prediction only	COG1606	KO:K06864	ATP-utilizing enzyme, PP-loop superfamily
R. intestinalis L1-82	ROSINTL182_RS19130	2.19896	3.56702e-09	3.69501e-07	[K] Transcription	COG1802		DNA-binding transcriptional regulator, GntR family
R. intestinalis L1-82	ROSINTL182_RS22285	2.2063	1.12584e-07	6.95653e-06
R. intestinalis L1-82	ROSINTL182_RS16220	2.23283	0.00452699	0.0234471
R. intestinalis L1-82	ROSINTL182_RS08470	2.27502	5.46015e-13	1.13122e-10	[O] Posttranslational modification, protein turnover, chaperones	COG0484	KO:K03686	DnaJ-class molecular chaperone with C-terminal Zn finger domain
R. intestinalis L1-82	ROSINTL182_RS11955	2.27551	0.000319161	0.00339603	[C] Energy production and conversion	COG0355	KO:K02114	FoF1-type ATP synthase, epsilon subunit
R. intestinalis L1-82	ROSINTL182_RS11480	2.28506	0.00178917	0.0122166	[R] General function prediction only	COG1917		Cupin domain protein related to quercetin dioxygenase
R. intestinalis L1-82	ROSINTL182_RS10310	2.32979	3.65513e-11	5.85153e-09
R. intestinalis L1-82	ROSINTL182_RS20360	2.3602	0.0104338	0.0419496
R. intestinalis L1-82	ROSINTL182_RS12160	2.38447	1.35434e-10	1.98749e-08	[O] Posttranslational modification, protein turnover, chaperones	COG0234	KO:K04078	Co-chaperonin GroES (HSP10)
R. intestinalis L1-82	ROSINTL182_RS04525	2.39181	1.78304e-11	3.13993e-09	[F] Nucleotide transport and metabolism	COG0104	KO:K01939	Adenylosuccinate synthase
R. intestinalis L1-82	ROSINTL182_RS10320	2.40108	2.63675e-14	7.14357e-12	[R] General function prediction only	COG1453		Predicted oxidoreductase of the aldo/keto reductase family
R. intestinalis L1-82	ROSINTL182_RS15625	2.42842	5.10968e-10	6.92165e-08
R. intestinalis L1-82	ROSINTL182_RS15620	2.43483	2.59124e-09	2.94398e-07	[P] Inorganic ion transport and metabolism	COG2239	KO:K06213	Mg/Co/Ni transporter MgtE (contains CBS domain)
R. intestinalis L1-82	ROSINTL182_RS11990	2.43726	0.00442053	0.0230404	[C] Energy production and conversion	COG0356	KO:K02108	FoF1-type ATP synthase, membrane subunit a
R. intestinalis L1-82	ROSINTL182_RS13880	2.49238	0.00178883	0.0122166
R. intestinalis L1-82	ROSINTL182_RS19335	2.49452	1.16869e-08	1.08474e-06
R. intestinalis L1-82	ROSINTL182_RS01355	2.50325	0.00586772	0.028088	[L] Replication, recombination and repair	COG0863		DNA modification methylase
R. intestinalis L1-82	ROSINTL182_RS01445	2.51717	0.00330176	0.0184292			KO:K06405
R. intestinalis L1-82	ROSINTL182_RS08460	2.53954	8.05059e-08	5.25078e-06	[O] Posttranslational modification, protein turnover, chaperones	COG0576	KO:K03687	Molecular chaperone GrpE (heat shock protein)
R. intestinalis L1-82	ROSINTL182_RS08455	2.58287	1.06787e-08	1.04473e-06	[K] Transcription	COG1420	KO:K03705	Transcriptional regulator of heat shock response
R. intestinalis L1-82	ROSINTL182_RS14215	2.59088	0.00014389	0.00188394	[G] Carbohydrate transport and metabolism	COG3405	KO:K15531	Endo-1,4-beta-D-glucanase Y
R. intestinalis L1-82	ROSINTL182_RS07540	2.59276	3.85721e-07	1.94073e-05	[P] Inorganic ion transport and metabolism	COG0614	KO:K02016	ABC-type Fe3+-hydroxamate transport system, periplasmic component
R. intestinalis L1-82	ROSINTL182_RS01215	2.59343	5.59473e-06	0.000151574	[M] Cell wall/membrane/envelope biogenesis	COG1316		Anionic cell wall polymer biosynthesis enzyme, LytR-Cps2A-Psr (LCP) family
R. intestinalis L1-82	ROSINTL182_RS20365	2.60452	0.000500688	0.00470246	[O] Posttranslational modification, protein turnover, chaperones	COG0526		Thiol-disulfide isomerase or thioredoxin
R. intestinalis L1-82	ROSINTL182_RS01690	2.647	1.71821e-06	6.2387e-05
R. intestinalis L1-82	ROSINTL182_RS20565	2.71185	1.81415e-06	6.32617e-05
R. intestinalis L1-82	ROSINTL182_RS13845	2.71736	0.0001086	0.00154541	[O] Posttranslational modification, protein turnover, chaperones	COG0071		Molecular chaperone IbpA, HSP20 family
R. intestinalis L1-82	ROSINTL182_RS20740	2.73414	0.00219783	0.0140231
R. intestinalis L1-82	ROSINTL182_RS17680	2.74734	1.11257e-06	4.38895e-05
R. intestinalis L1-82	ROSINTL182_RS22080	2.82497	2.3619e-08	2.13298e-06
R. intestinalis L1-82	ROSINTL182_RS15795	2.83078	4.9997e-05	0.000898416
R. intestinalis L1-82	ROSINTL182_RS04565	2.8394	1.22813e-09	1.60203e-07
R. intestinalis L1-82	ROSINTL182_RS13805	2.91529	9.07601e-05	0.00136606			KO:K05349
R. intestinalis L1-82	ROSINTL182_RS10870	2.94915	0.00325799	0.0183009
R. intestinalis L1-82	ROSINTL182_RS09315	2.98527	5.33911e-08	4.0879e-06	[M] Cell wall/membrane/envelope biogenesis	COG1368		Phosphoglycerol transferase MdoB or a related enzyme of AlkP superfamily
R. intestinalis L1-82	ROSINTL182_RS04520	2.99409	1.99741e-18	8.79359e-16	[H] Coenzyme transport and metabolism	COG1011	KO:K07025	FMN phosphatase YigB, HAD superfamily
R. intestinalis L1-82	ROSINTL182_RS11320	2.99757	2.30027e-10	3.24062e-08	[K] Transcription	COG1846		DNA-binding transcriptional regulator, MarR family
R. intestinalis L1-82	ROSINTL182_RS06035	2.99944	0.00165138	0.011586	[G] Carbohydrate transport and metabolism	COG1312	KO:K01686	D-mannonate dehydratase
R. intestinalis L1-82	ROSINTL182_RS08465	3.00658	1.017e-16	3.97988e-14	[O] Posttranslational modification, protein turnover, chaperones	COG0443	KO:K04043	Molecular chaperone DnaK (HSP70)
R. intestinalis L1-82	ROSINTL182_RS20355	3.05053	0.00170311	0.0118311
R. intestinalis L1-82	ROSINTL182_RS15230	3.16596	4.86001e-15	1.42641e-12			KO:K04079
R. intestinalis L1-82	ROSINTL182_RS11330	3.18031	2.20149e-21	1.29228e-18	[V] Defense mechanisms	COG1132	KO:K06147	ABC-type multidrug transport system, ATPase and permease component
R. intestinalis L1-82	ROSINTL182_RS12295	3.44211	1.7611e-06	6.32617e-05			KO:K01992
R. intestinalis L1-82	ROSINTL182_RS07845	3.68676	1.85689e-07	1.08999e-05			KO:K01449
R. intestinalis L1-82	ROSINTL182_RS12870	3.79982	1.93894e-07	1.1195e-05	[O] Posttranslational modification, protein turnover, chaperones	COG0484	KO:K03686	DnaJ-class molecular chaperone with C-terminal Zn finger domain
R. intestinalis L1-82	ROSINTL182_RS03055	3.83121	2.59007e-13	6.08148e-11	[G] Carbohydrate transport and metabolism	COG0524	KO:K00874	Sugar or nucleoside kinase, ribokinase family
R. intestinalis L1-82	ROSINTL182_RS12285	3.87973	0.000105292	0.00151362	[V] Defense mechanisms	COG1131		ABC-type multidrug transport system, ATPase component
R. intestinalis L1-82	ROSINTL182_RS13800	3.92571	2.46002e-06	7.9488e-05
R. intestinalis L1-82	ROSINTL182_RS05430	3.9606	2.07669e-09	2.52211e-07	[R] General function prediction only	COG1033	KO:K07003	Predicted exporter protein, RND superfamily
R. intestinalis L1-82	ROSINTL182_RS03050	3.98951	7.68396e-21	3.86613e-18	[G] Carbohydrate transport and metabolism	COG0524	KO:K00874	Sugar or nucleoside kinase, ribokinase family
R. intestinalis L1-82	ROSINTL182_RS05435	4.17213	3.13283e-13	6.89615e-11			KO:K01421
R. intestinalis L1-82	ROSINTL182_RS16520	4.2405	0.00140389	0.0104979	[P] Inorganic ion transport and metabolism	COG0735	KO:K03711	Fe2+ or Zn2+ uptake regulation protein
R. intestinalis L1-82	ROSINTL182_RS20305	4.63432	4.46035e-08	3.57031e-06
R. intestinalis L1-82	ROSINTL182_RS15030	4.69244	6.61303e-08	4.65822e-06
R. intestinalis L1-82	ROSINTL182_RS01700	4.82274	2.34134e-31	2.74873e-28	[G] Carbohydrate transport and metabolism	COG0800	KO:K01625	2-keto-3-deoxy-6-phosphogluconate aldolase
R. intestinalis L1-82	ROSINTL182_RS20300	4.88169	7.18294e-14	1.80702e-11
R. intestinalis L1-82	ROSINTL182_RS05440	4.94613	6.33411e-23	4.46175e-20	[P] Inorganic ion transport and metabolism	COG1971		Putative Mn2+ efflux pump MntP
R. intestinalis L1-82	ROSINTL182_RS18880	5.09357	6.94161e-09	6.98524e-07
R. intestinalis L1-82	ROSINTL182_RS05035	5.13263	0.00559907	0.0272075	[G] Carbohydrate transport and metabolism	COG0148	KO:K01689	Enolase
R. intestinalis L1-82	ROSINTL182_RS02055	5.21422	1.70704e-23	1.50305e-20	[O] Posttranslational modification, protein turnover, chaperones	COG0542	KO:K03695	ATP-dependent Clp protease ATP-binding subunit ClpA
R. intestinalis L1-82	ROSINTL182_RS02040	5.26607	4.56044e-07	2.20026e-05	[R] General function prediction only - [G] Carbohydrate transport and metabolism	COG0637	KO:K01838	Beta-phosphoglucomutase or related phosphatase, HAD superfamily
R. intestinalis L1-82	ROSINTL182_RS01705	5.46957	5.19343e-16	1.82913e-13	[R] General function prediction only - [G] Carbohydrate transport and metabolism - [F] Nucleotide transport and metabolism	COG0537		Diadenosine tetraphosphate (Ap4A) hydrolase or other HIT family hydrolase
R. intestinalis L1-82	ROSINTL182_RS10185	5.76703	1.02902e-37	1.8121e-34	[E] Amino acid transport and metabolism - [G] Carbohydrate transport and metabolism	COG0129	KO:K01687	Dihydroxyacid dehydratase/phosphogluconate dehydratase
R. intestinalis L1-82	ROSINTL182_RS10190	6.08245	1.29953e-62	4.57694e-59	[G] Carbohydrate transport and metabolism - [R] General function prediction only	COG2610	KO:K03299 - KO:K06156	H+/gluconate symporter or related permease
R. intestinalis L1-82	ROSINTL182_RS09150	6.19899	2.62528e-08	2.31156e-06
