# Supplementary material for: Integrated culturing, modeling and transcriptomics uncovers complex interactions and emergent behavior in a three-species synthetic gut community
Source: eLife. 2018 Oct 16;7:e37090. doi: 10.7554/eLife.37090 (PMC6237439; doi:10.7554/eLife.37090)
Supplement: Supplementary file 4. [file elife-37090-supp4.xlsx]

## Sheet: flow cytometry counts
	24h	48h
0-A	424500000	453500000
0-B	426500000	456500000
0-C	457000000	305500000
10-A	366500000	489000000
10-B	405000000	470500000
10-C	380500000	430000000
50-A	382000000	457000000
50-B	425500000	447500000
50-C	339500000	423500000
100-A	317500000	460000000
100-B	339000000	434500000
100-C	379500000	410500000
0, 10, 50, 100: Addition of B12 solution in μL
A-C: biological replicates
Counts are reported as means of 2 technical replicates
