# Supplementary material for: Integrated culturing, modeling and transcriptomics uncovers complex interactions and emergent behavior in a three-species synthetic gut community
Source: eLife. 2018 Oct 16;7:e37090. doi: 10.7554/eLife.37090 (PMC6237439; doi:10.7554/eLife.37090)
Supplement: Supplementary file 5. [file elife-37090-supp5.xlsx]

## Sheet: Primer and probe sequences
Target organism	Sequence ID	Forward primer (5’ -> 3’)	Reverse primer (5’ -> 3’)	Probe (5’ -> 3’)	Amplicon length (bp)	GC content amplicon (%)
Roseburia intestinalis DSM 14610T (L1-82)	NZ_GG692714.1	CCGTCAAGGCGTAAATAAGAGC	GCCGCATAGTACAACGGGTA	TGGACGCTGCTTGCATGGCGCGGA	106	58
Faecalibacterium prausnitzii DSM 17677T (A2-165)	NZ_GG697156.2	ATTCGCCATCCACAACGATG	TAAGCGGAATGGCGTATTGC	TCGCCCACCGCAACGCTTTCCGGAGA	116	53
Blautia hydrogenotrophica DSM 10507T (S5a33)	NZ_GG657681.1	CAAGTGCTGATCCAGAAAGTCC	GCTCAAAGTGCAGGTCGAATAC	TGGAGCCGCGCCGAAATCCCACGCT	112	57
location in genome:Blautia hydrogenotrophica DSM 10507 genomic scaffold Scfld3, whole genome shotgun sequence
region: 67-178
/product="plasmid recombination enzyme"
Sequence ID: ref|NZ_GG657681.1|
location in genome: Faecalibacterium prausnitzii A2-165 genomic scaffold Scfld7, whole genome shotgun sequence
region: 95277-95392
product="cadmium transporter"
Sequence ID: ref|NZ_GG697156.2|
cadmium-translocating P-type ATPase
location in genome Roseburia intestinalis L1-82 genomic scaffold Scfld1, whole genome shotgun sequence: 44212-44317
Not in gene, not in CDS
Sequence IDS: NZ_GG692714.1
in between /product="hypothetical protein" and product="reverse transcriptase"

## Sheet: Specificity
Target organism	Sequence ID	Forward primer (5’ -> 3’)	Reverse primer (5’ -> 3’)	Probe (5’ -> 3’)	Optimized primer concentration (forward/reverse) (μM)	Optimized probe concentration (forward/reverse) (μM)	Ct value with 50 ng/μl genomic DNA of R. intestinalis	Ct value with 50 ng/μl genomic DNA of F. prausnitzii	Ct value with 50 ng/μl genomic DNA of B. hydrogenotrophica	Ct value with 50 ng/μl genomic DNA of R. intestinalis, F. prausnitzii, and B. hydrogenotrophica
Roseburia intestinalis DSM 14610T (L1-82)	NZ_GG692714.1	CCGTCAAGGCGTAAATAAGAGC	GCCGCATAGTACAACGGGTA	TGGACGCTGCTTGCATGGCGCGGA	0.300/0.300	0.15	17.3427	32.8969	34.4278	17.4047
Faecalibacterium prausnitzii DSM 17677T (A2-165)	NZ_GG697156.2	ATTCGCCATCCACAACGATG	TAAGCGGAATGGCGTATTGC	TCGCCCACCGCAACGCTTTCCGGAGA	0.300/0.300	0.15	32.5371	15.4573	29.38	15.4095
Blautia hydrogenotrophica DSM 10507T (S5a33)	NZ_GG657681.1	CAAGTGCTGATCCAGAAAGTCC	GCTCAAAGTGCAGGTCGAATAC	TGGAGCCGCGCCGAAATCCCACGCT	0.300/0.300	0.15	22.8234	24.8411	8.7621	8.90035
Each qPCR assay mixture of 20 μL contained 10.0 μL of TaqMan® Fast Universal PCR Master Mix (2X), no AmpErase® UNG (Thermo Fisher Scientific), 2.0 μL of each primer (3.0 μM), and 2.0 μL of the Taqman probe (1.5 μM), 1.0 - 3.0 μL of sterile nuclease-freewater (Thermo Fisher Scientific) and 1.0 - 3.0 μL of extracted genomic DNA solution. The qPCR amplification program consisted of an initial denatu…
Samples were run in quadruplicate.
Ct: threshold cycle
