# Supplementary figures and images for: Integrated culturing, modeling and transcriptomics uncovers complex interactions and emergent behavior in a three-species synthetic gut community
Source: eLife journal article supplement (doi:10.7554/elife.37090), 2018-10-15

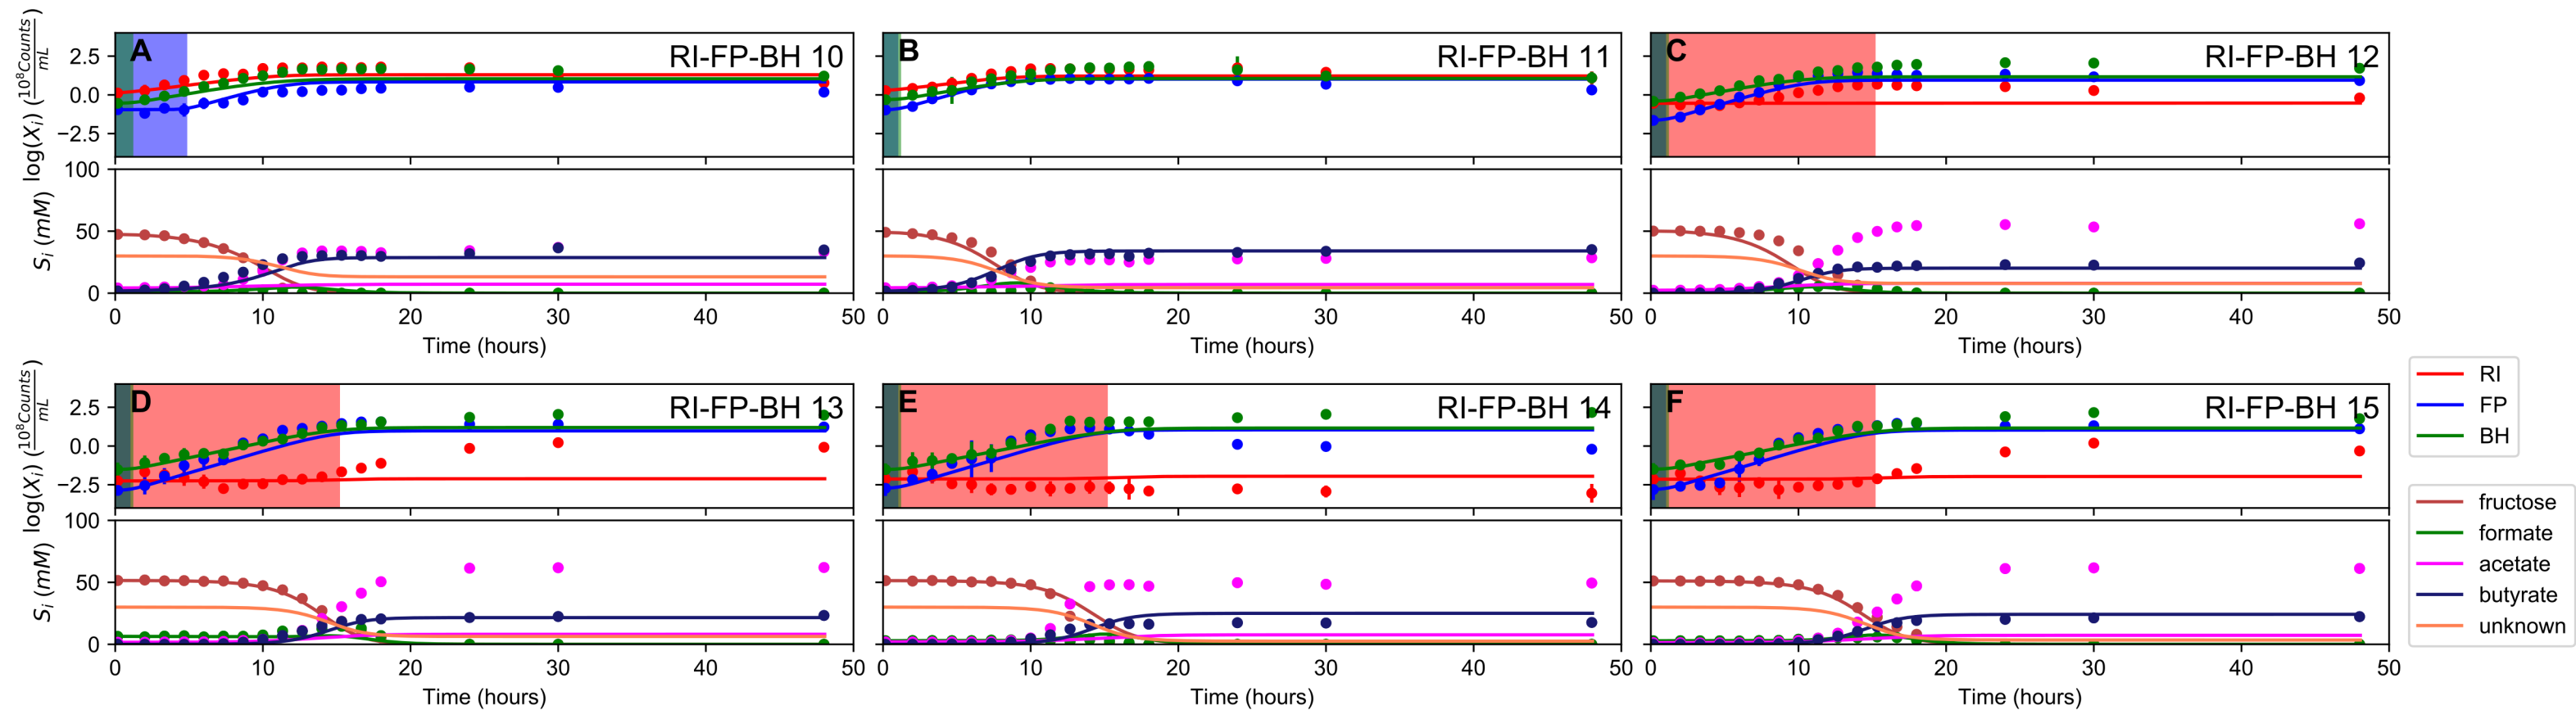

Supplement: supp [file elife-37090-supp-v1.zip]

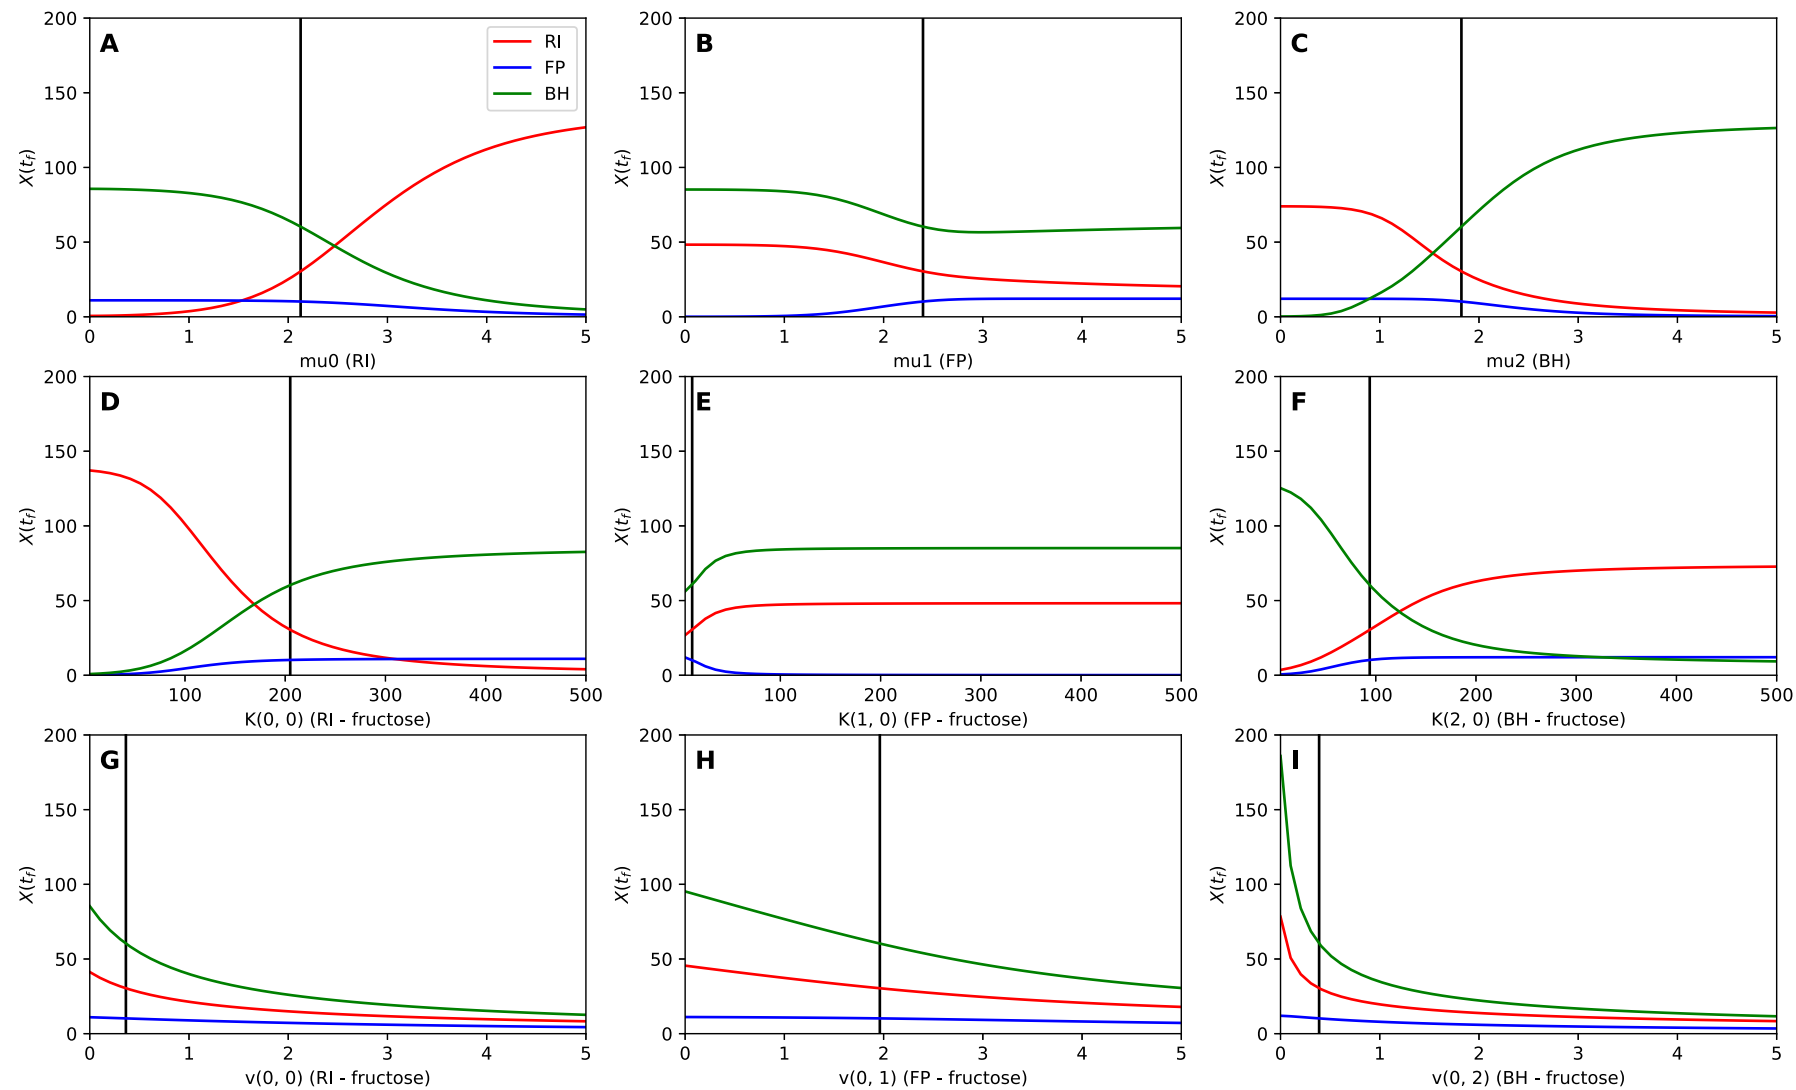

Supplement: supp [file elife-37090-supp-v1.zip]

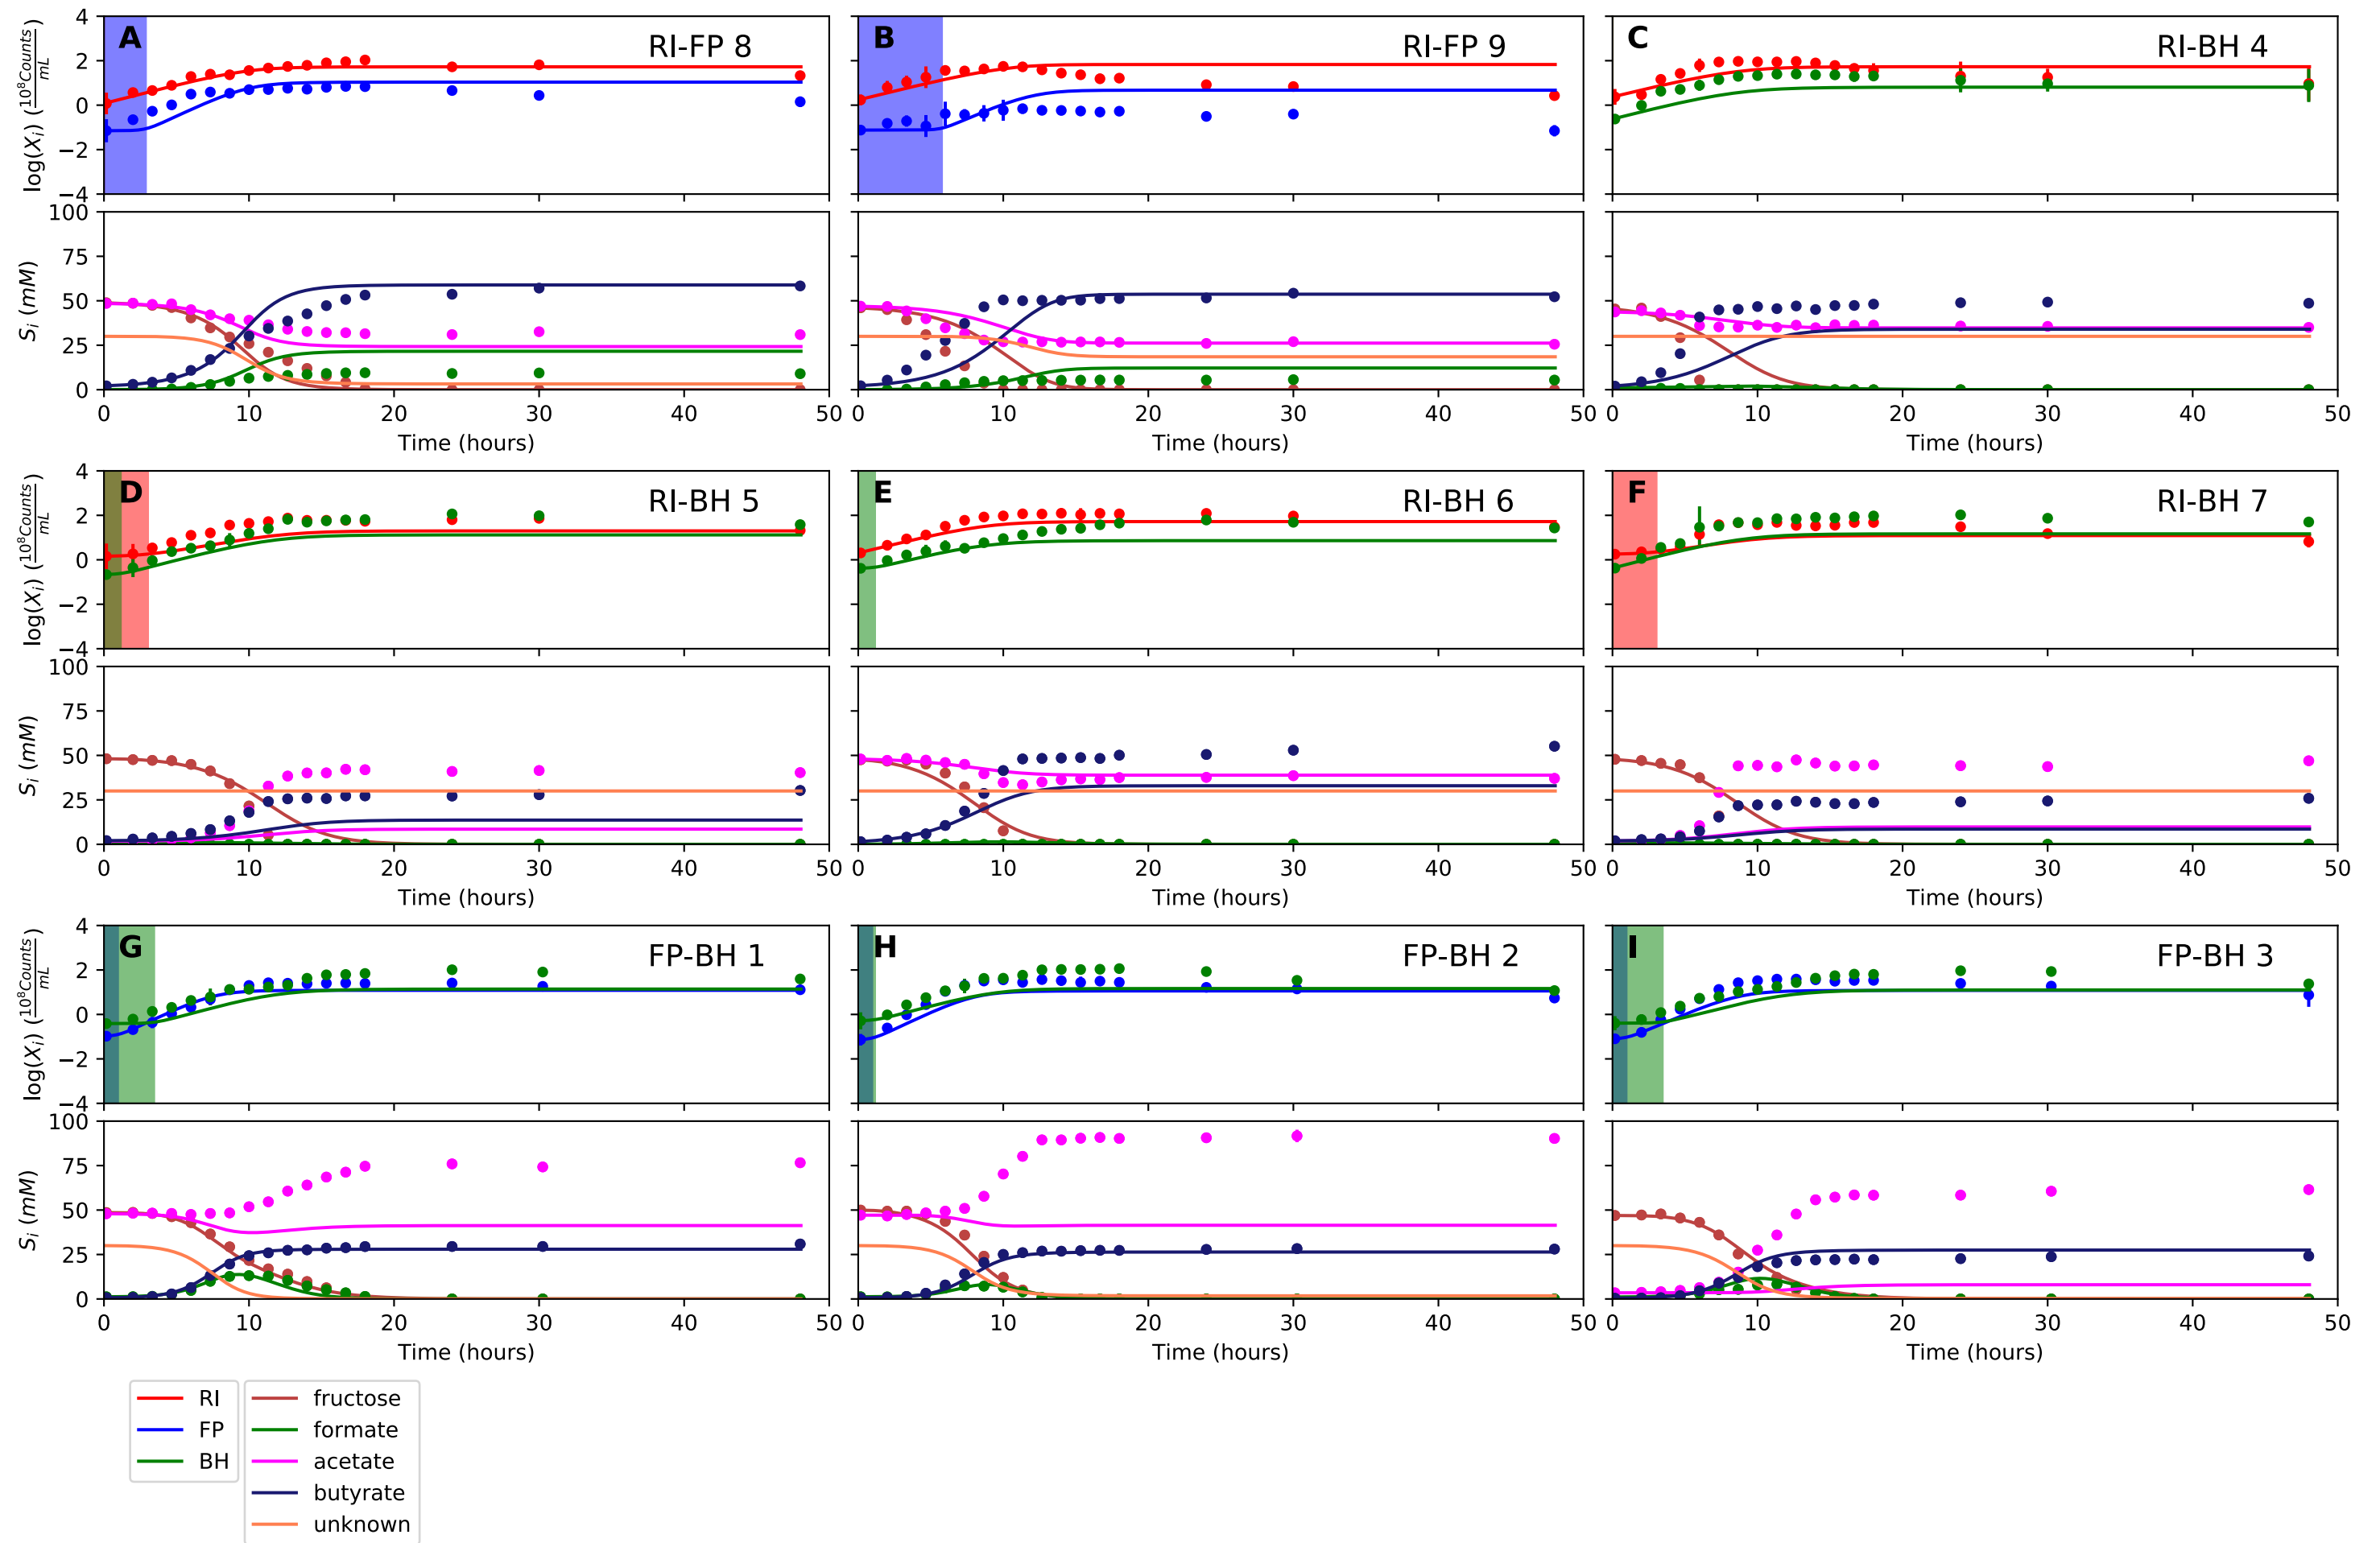

Supplement: supp [file elife-37090-supp-v1.zip]

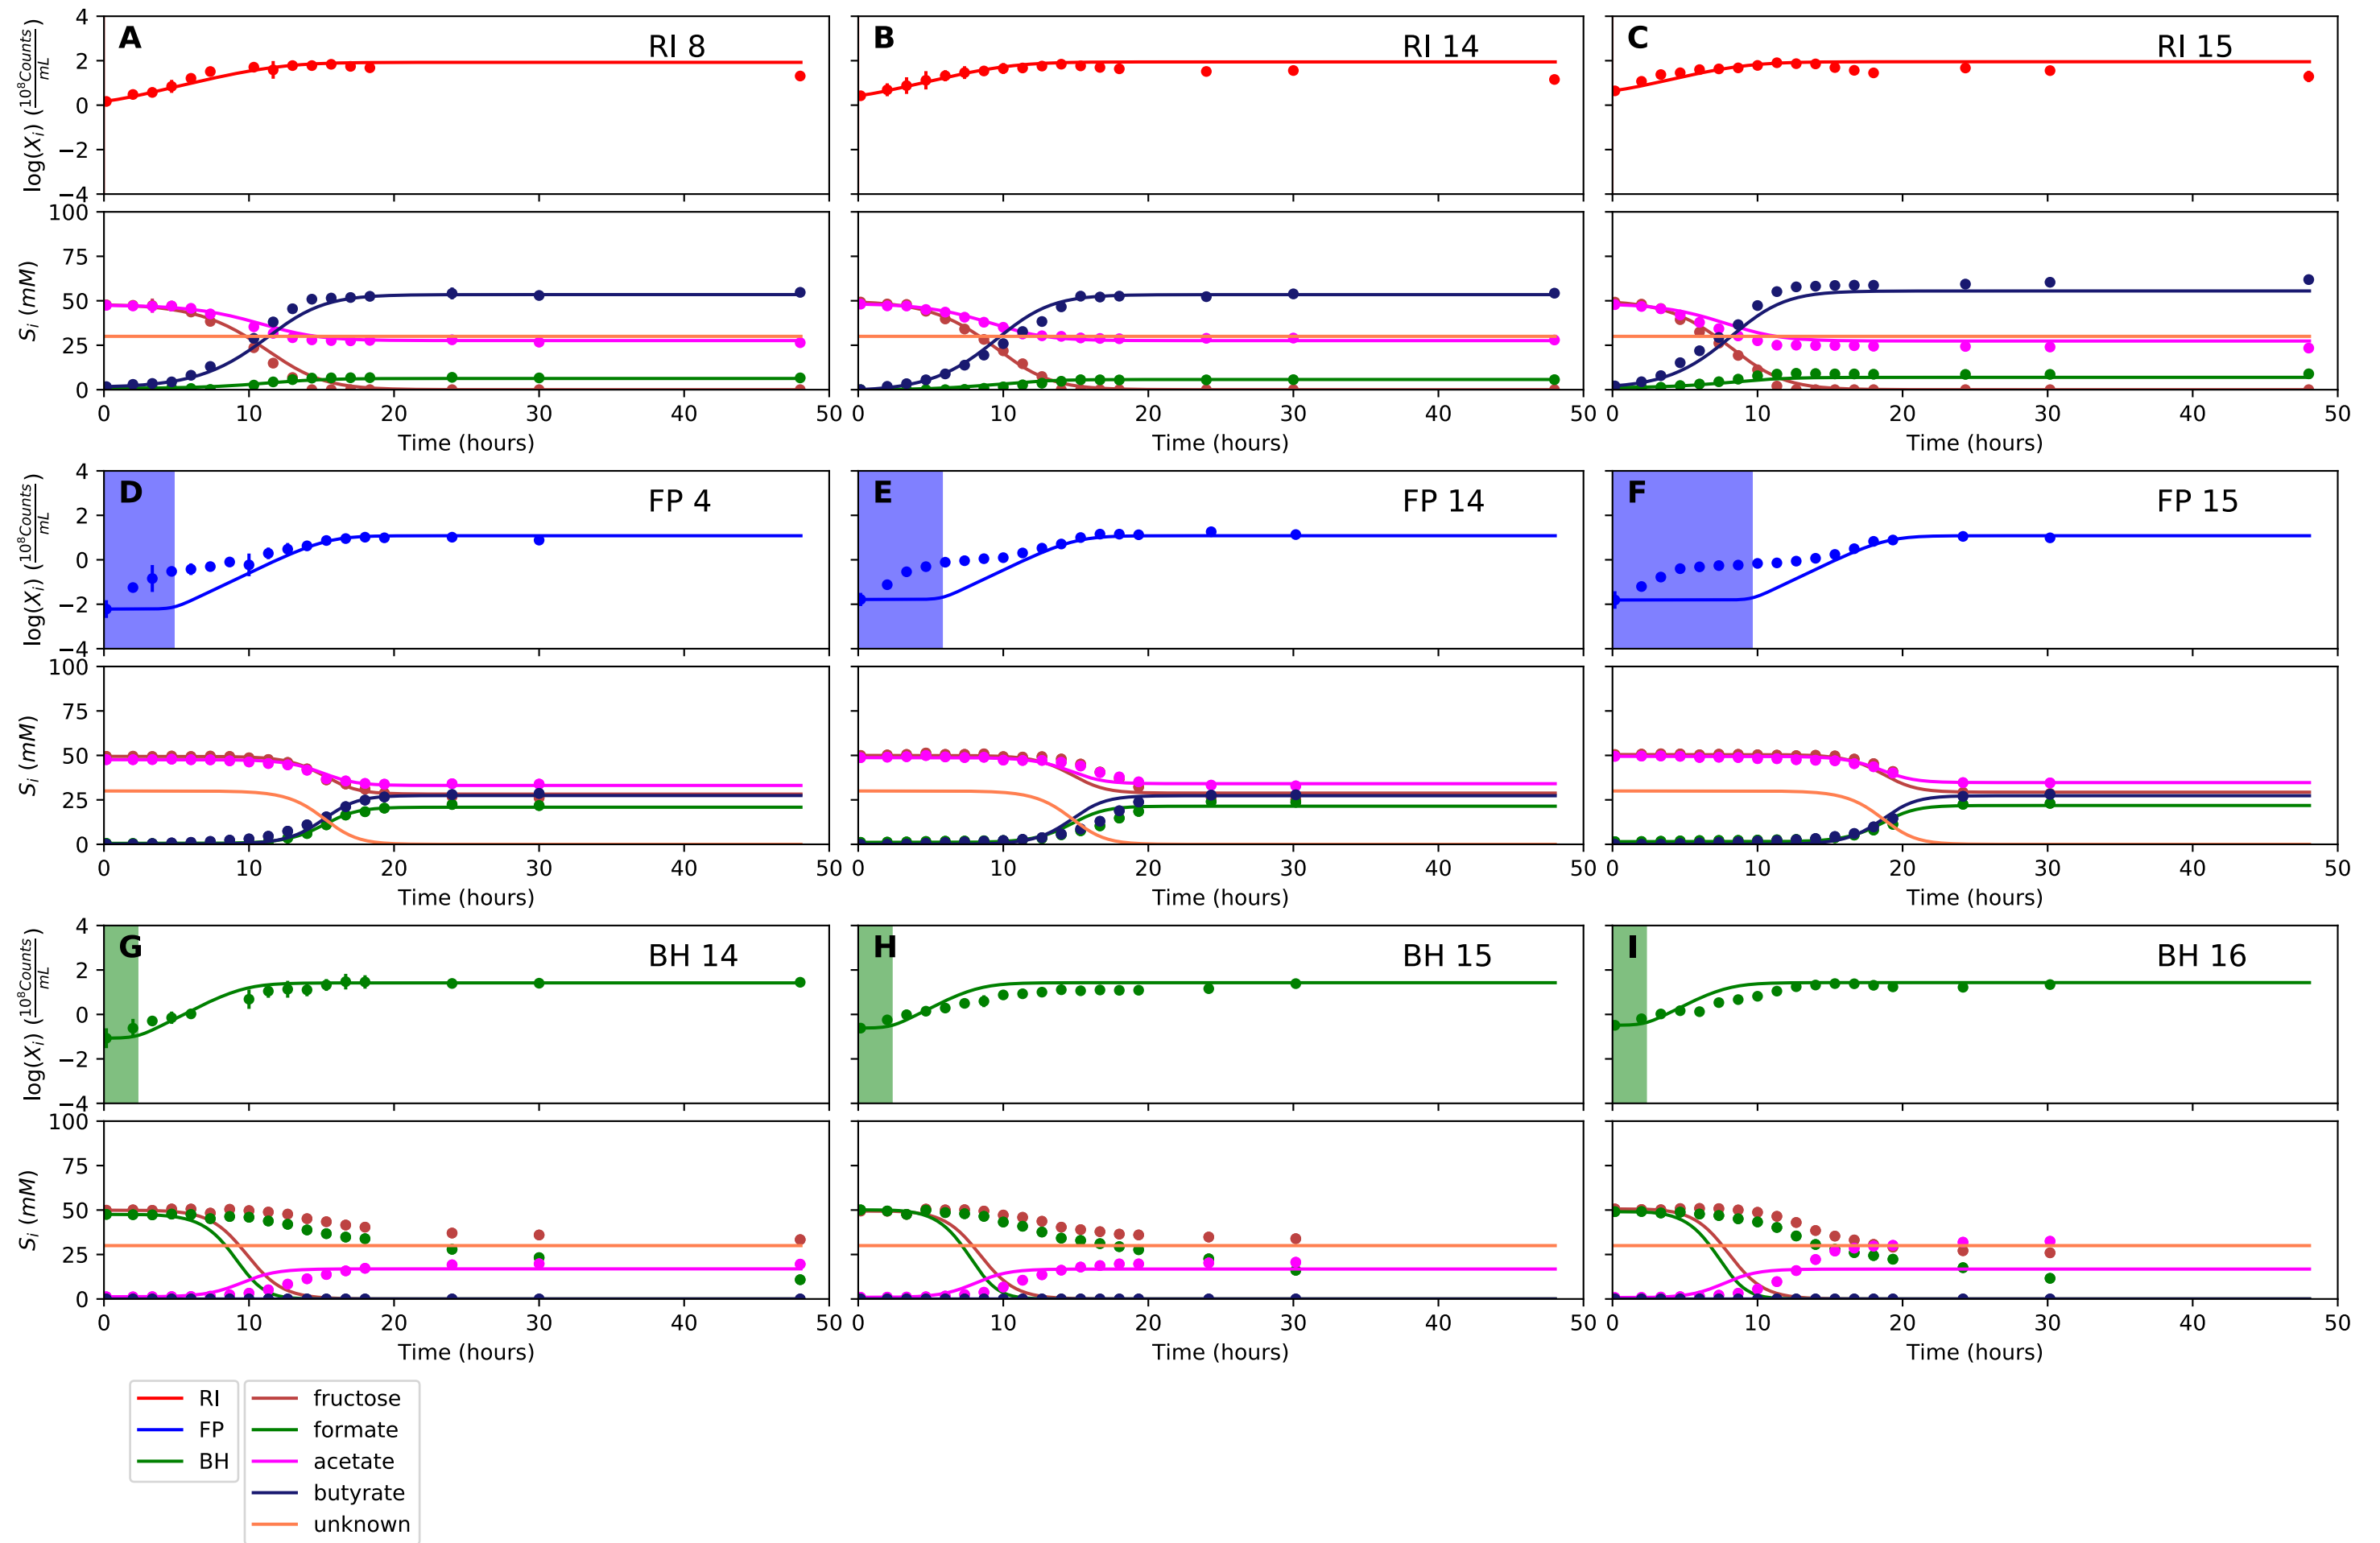

Supplement: supp [file elife-37090-supp-v1.zip]

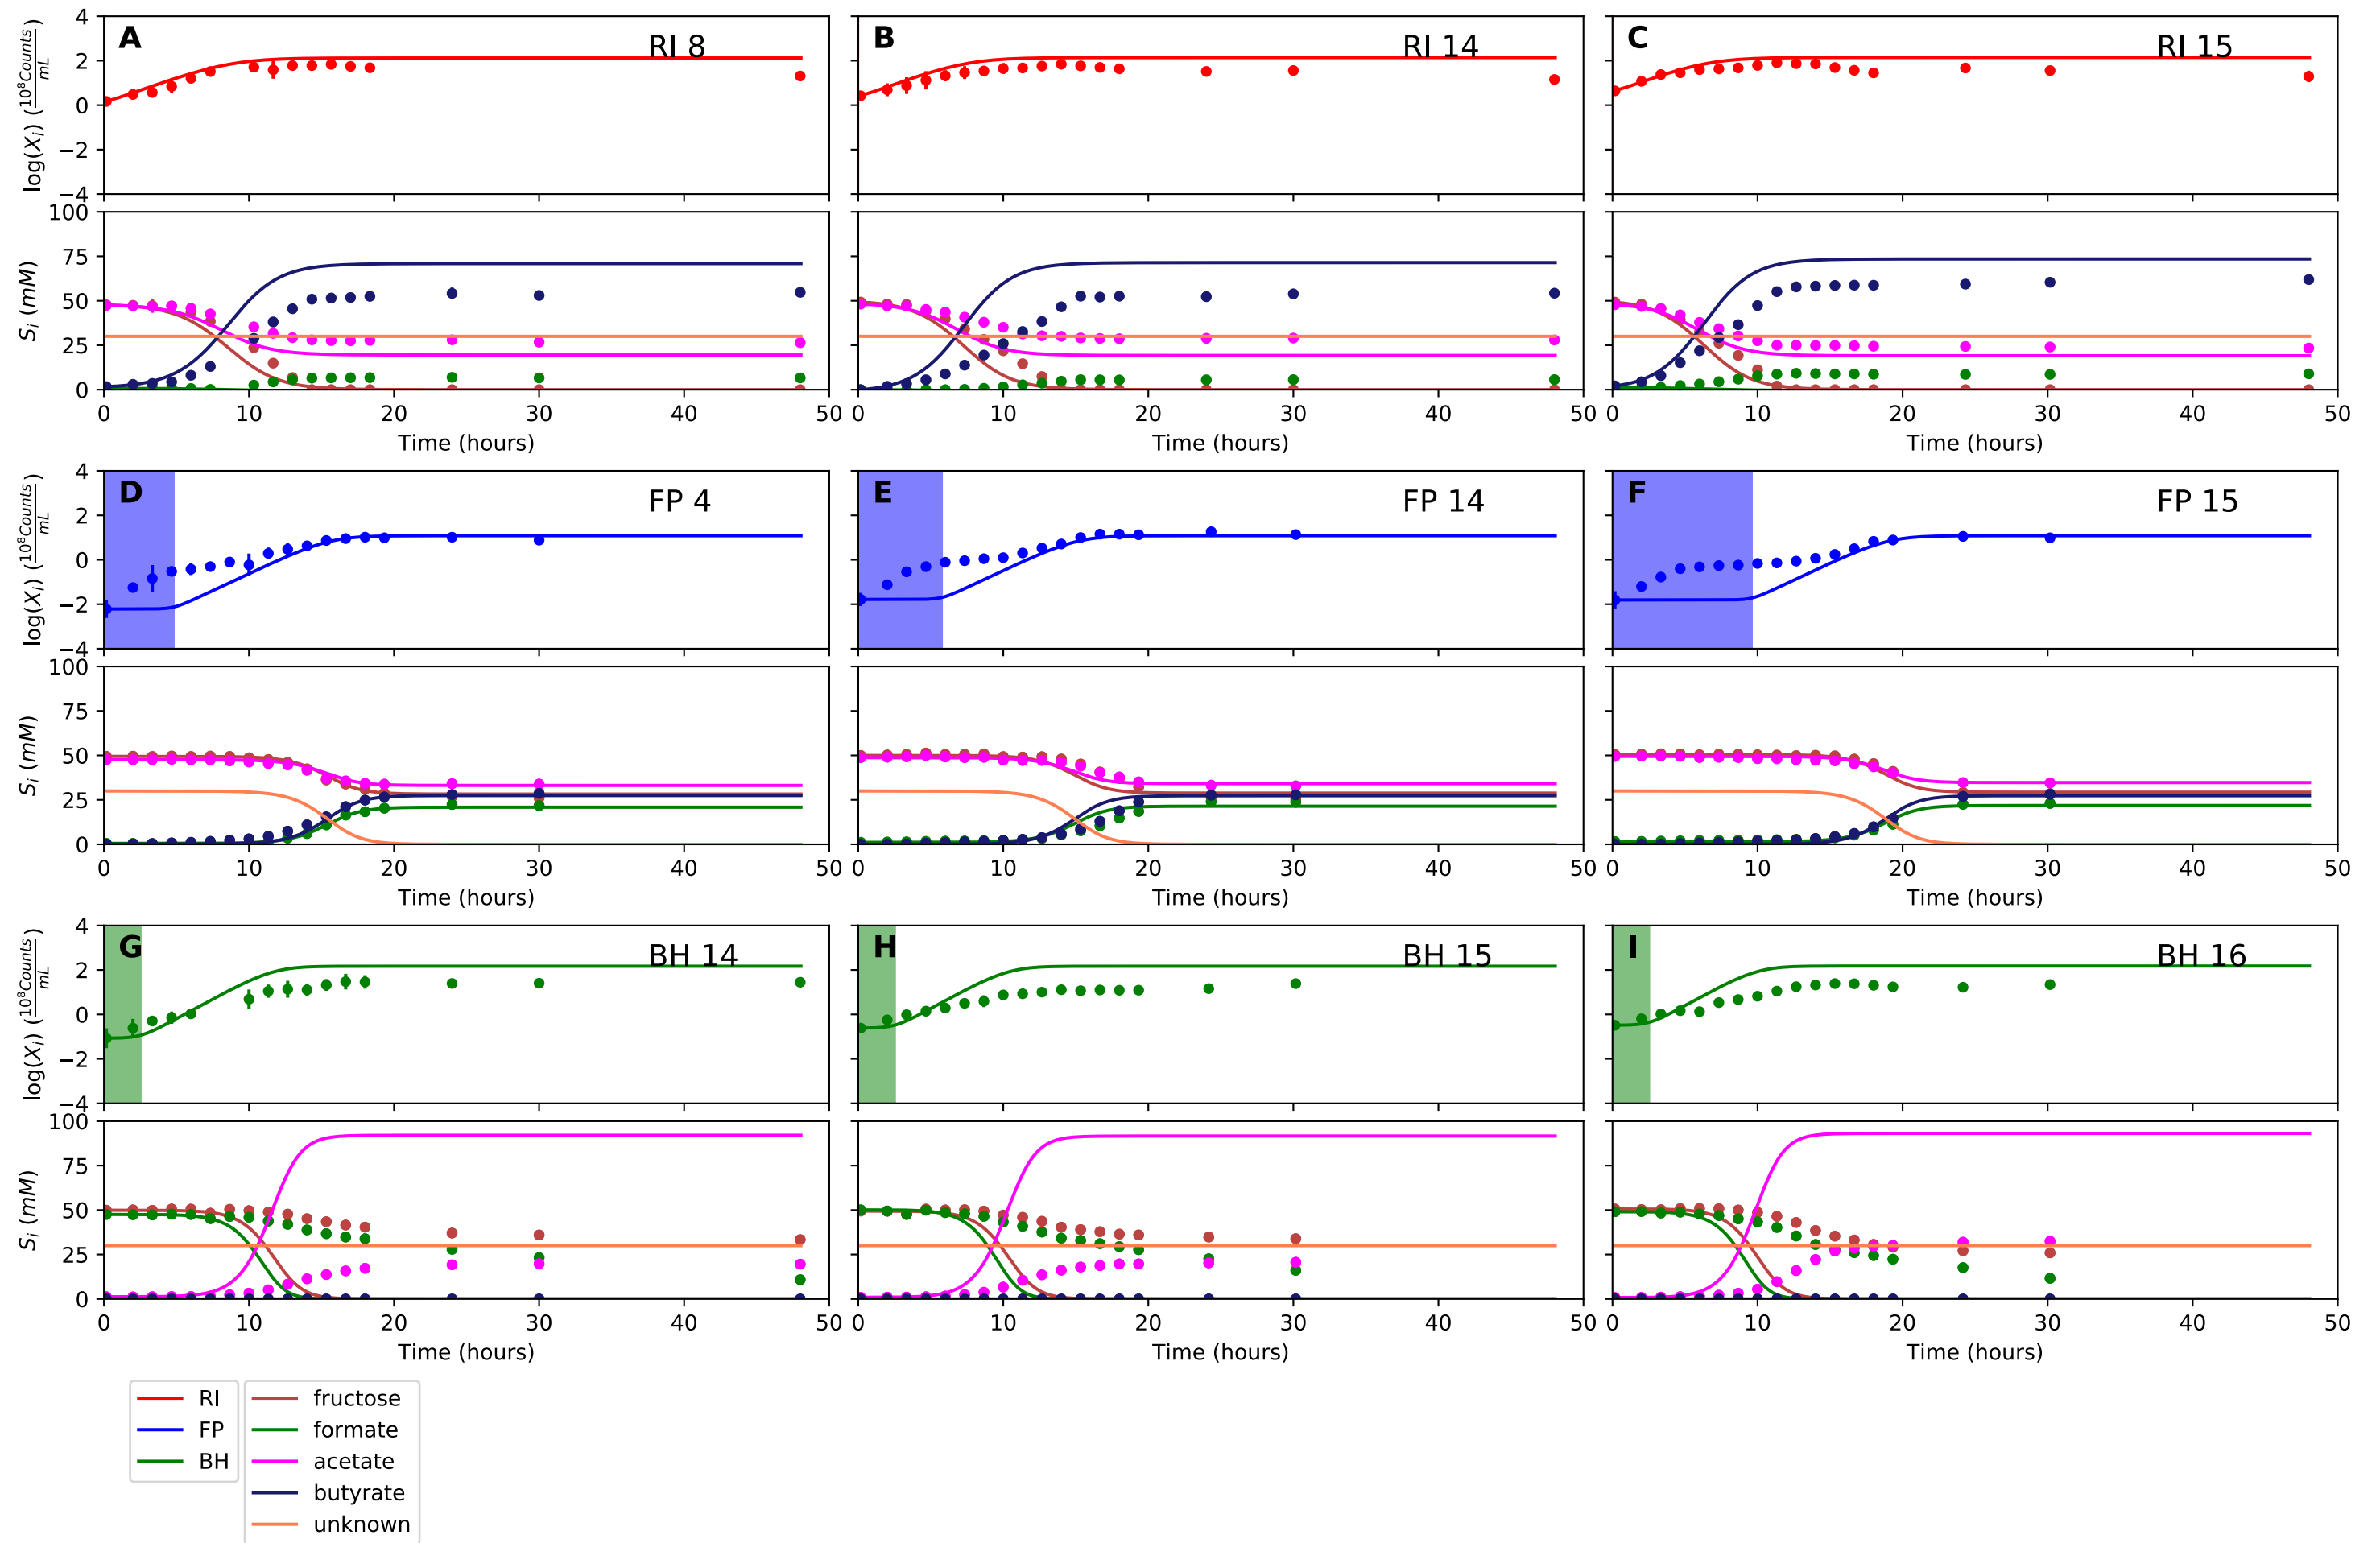

Supplement: supp [file elife-37090-supp-v1.zip]

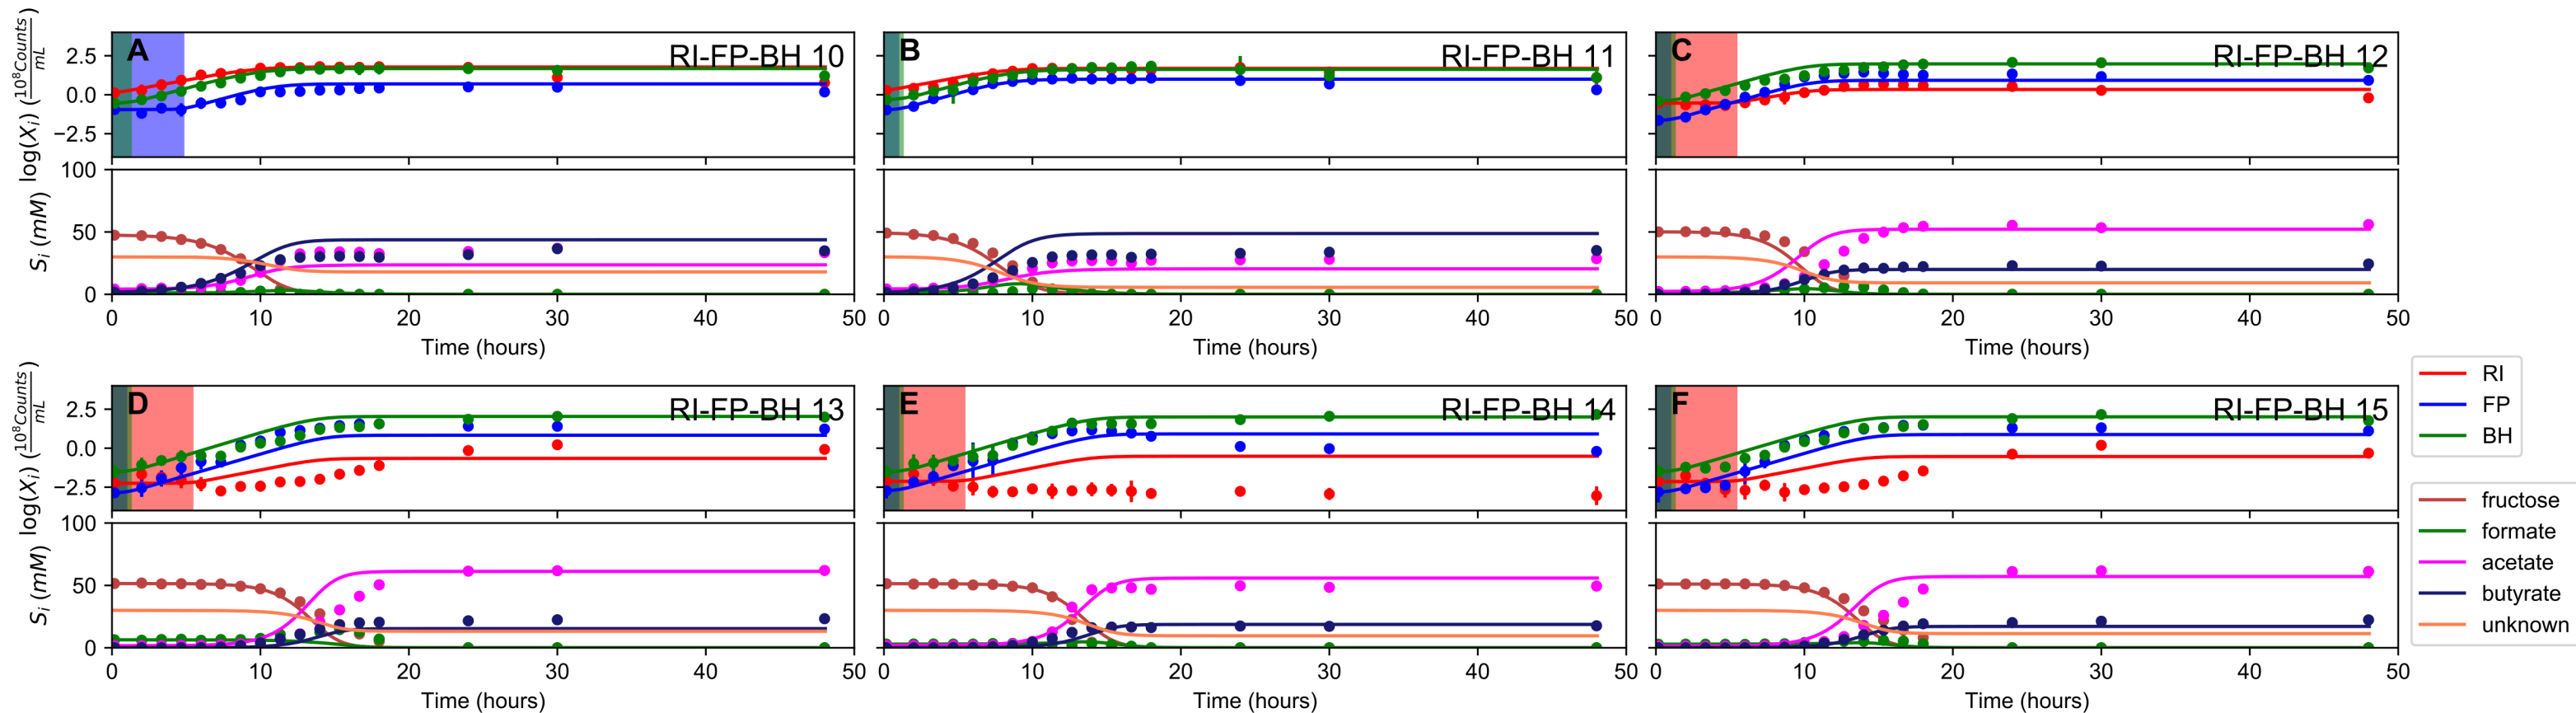

Supplement: supp [file elife-37090-supp-v1.zip]

### Top 10 taxa in rarefied samples

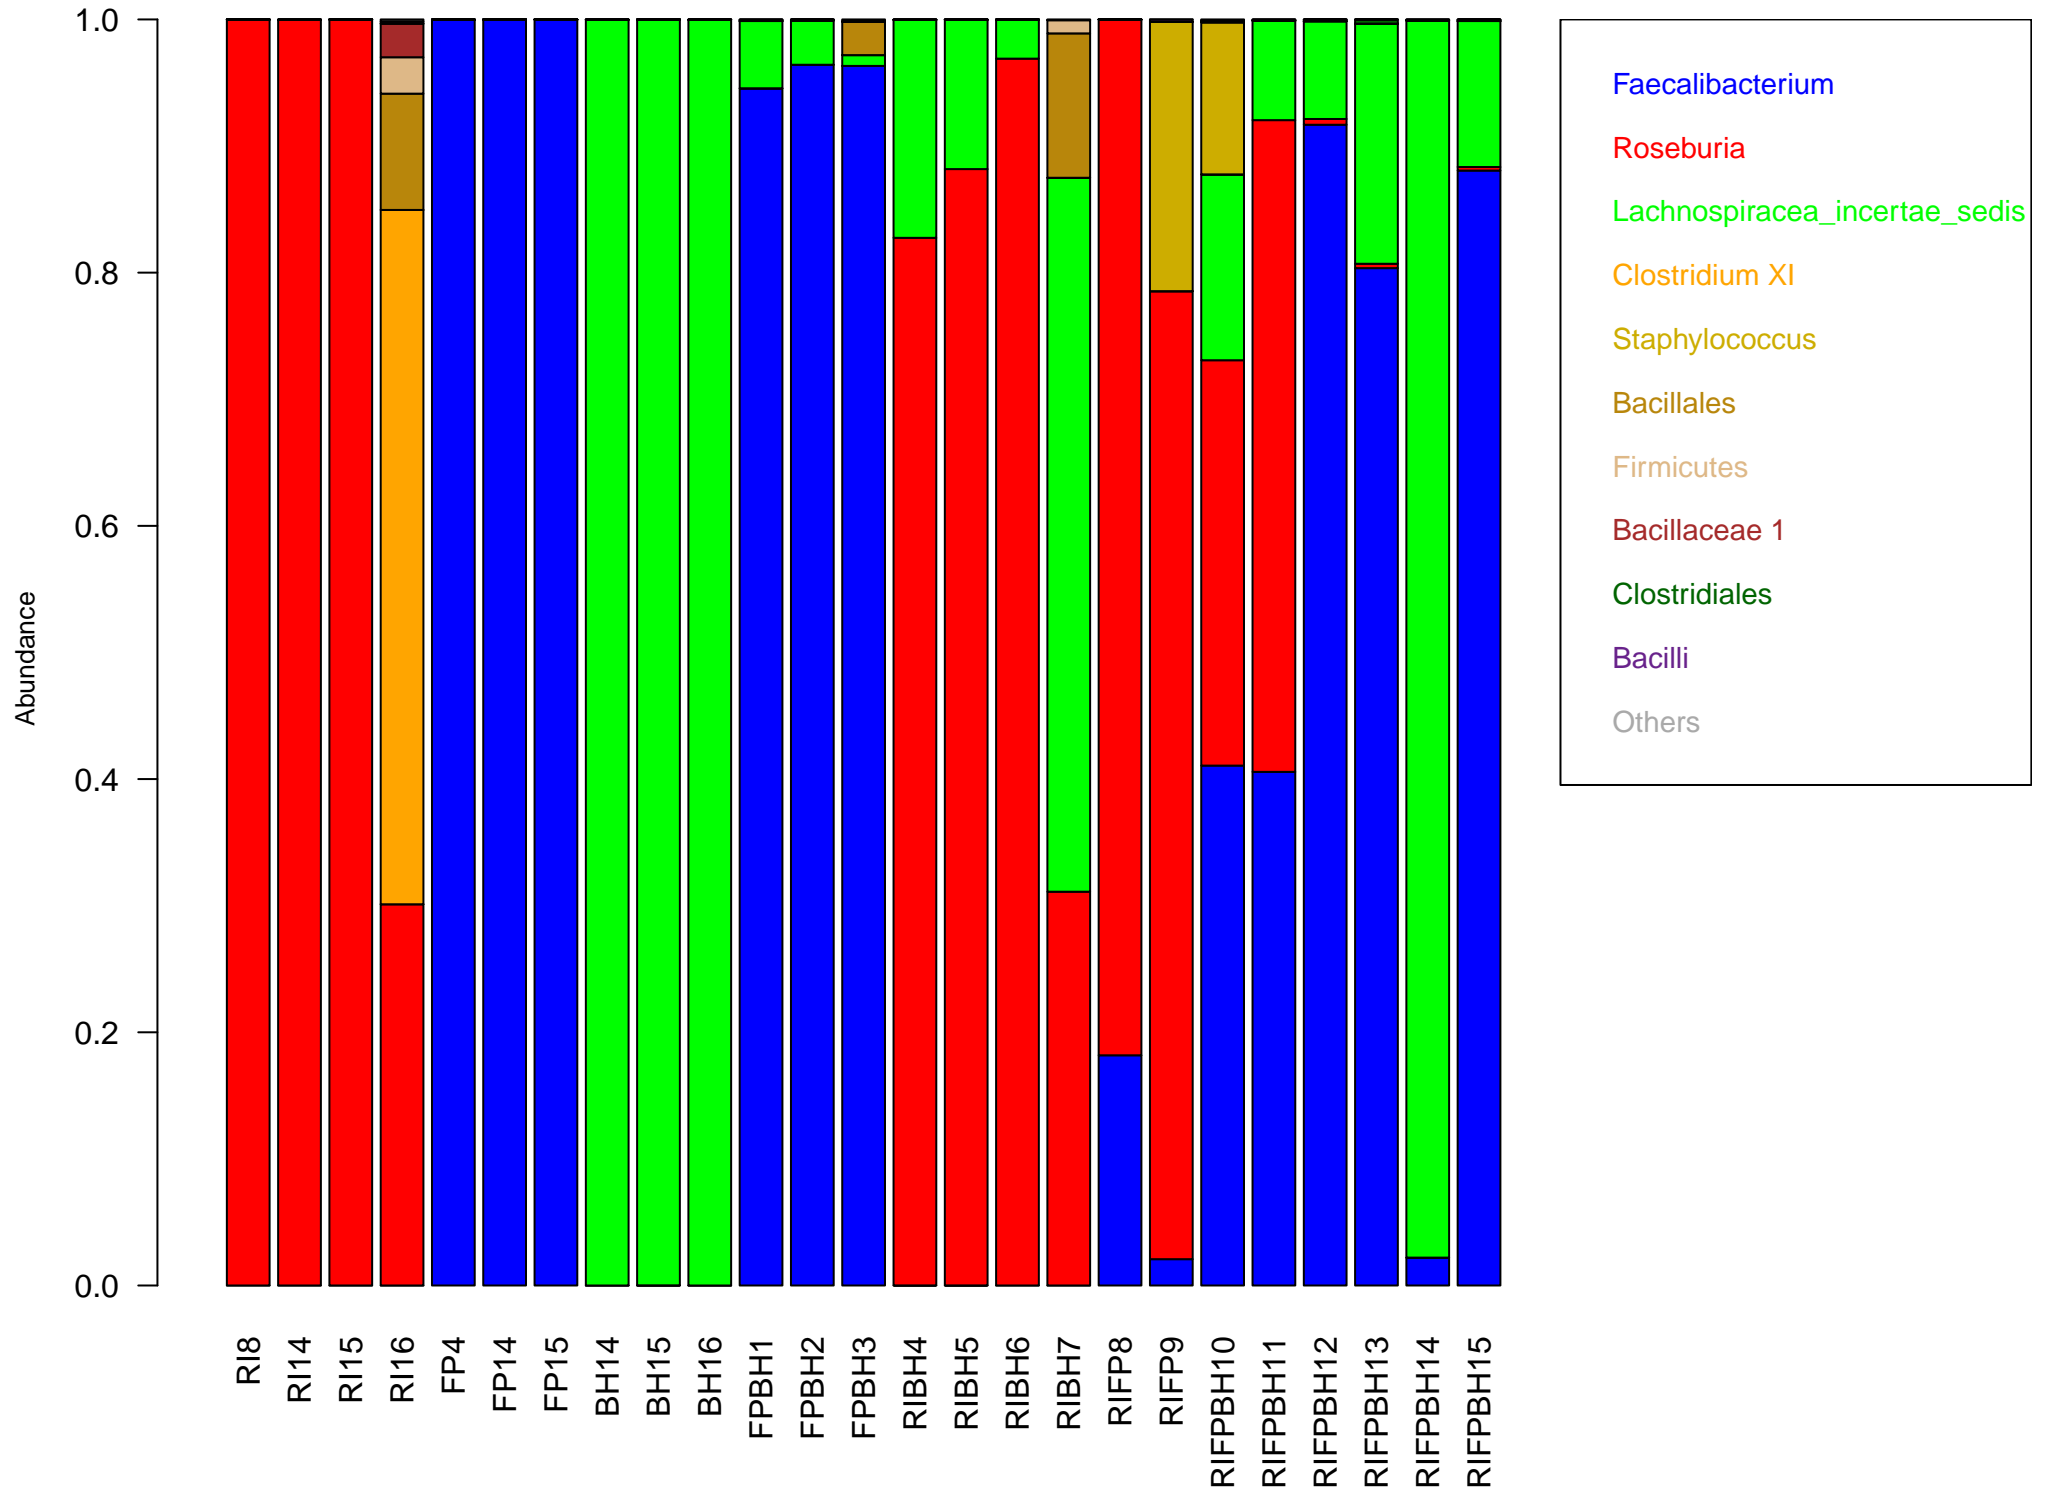

Supplement: supp [file elife-37090-supp-v1.zip]

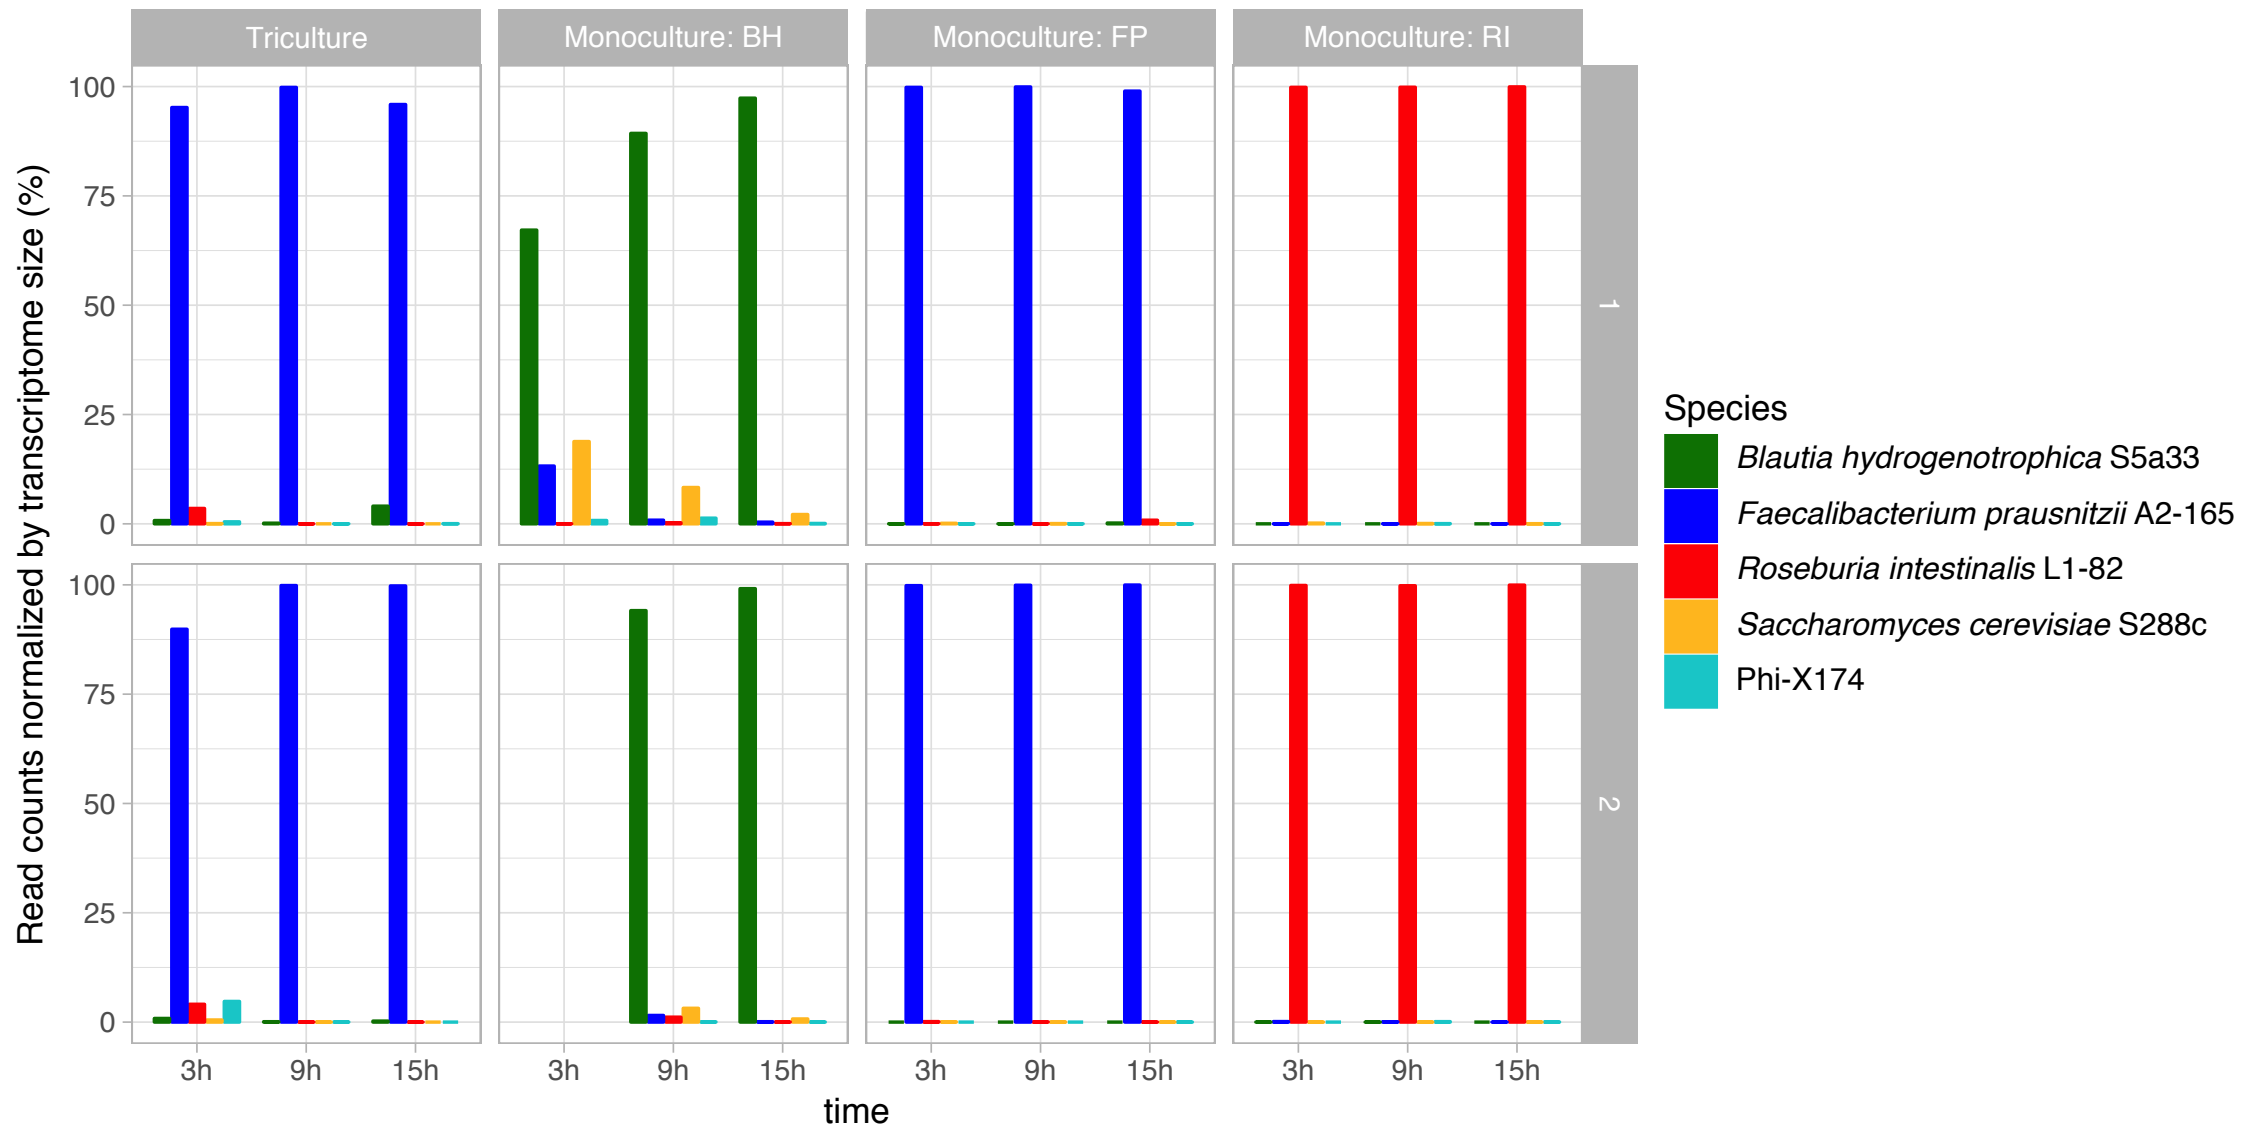

Supplement: supp [file elife-37090-supp-v1.zip]

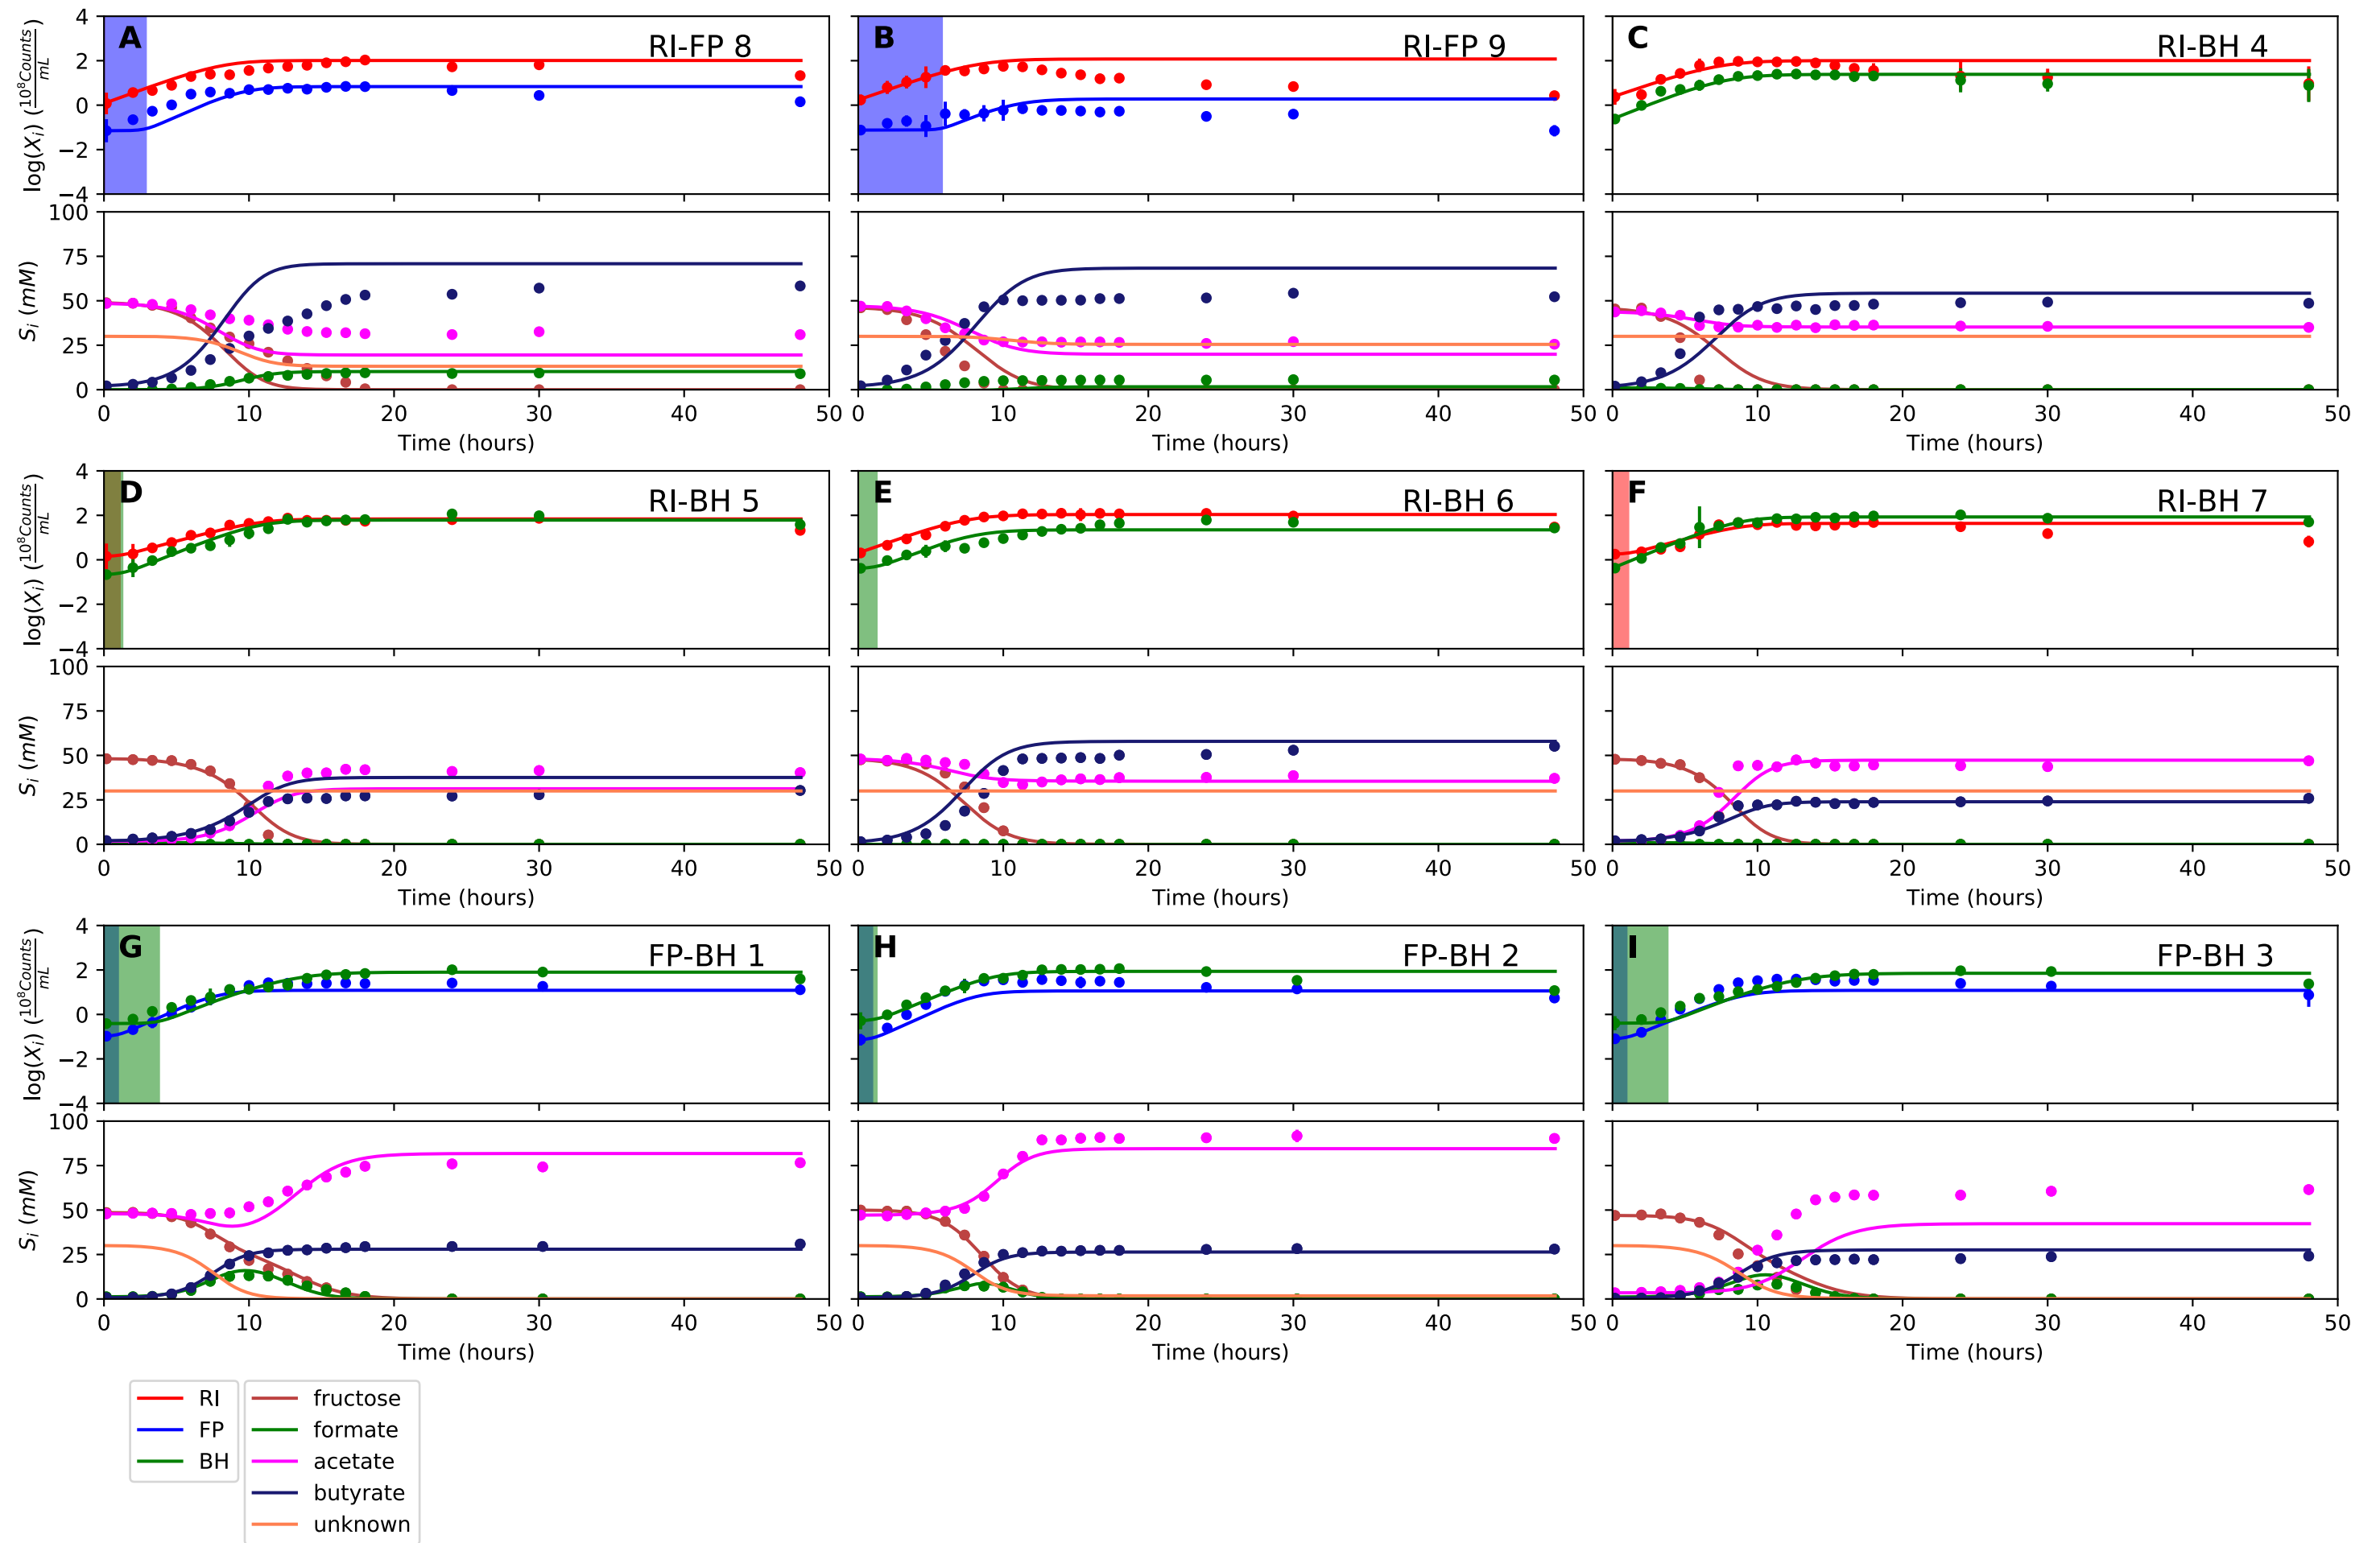

Supplement: supp [file elife-37090-supp-v1.zip]
